# Supplementary material for: Global sleep homeostasis reflects temporally and spatially integrated local cortical neuronal activity
Source: eLife. 2020 Jul 2;9:e54148. doi: 10.7554/eLife.54148 (PMC7332296; doi:10.7554/eLife.54148)
Supplement: Figure 1—source data 1. [file elife-54148-fig1-data1.zip]

Archive with 23 entries (20 files):
- Figure 1/Correlation-Values-Fig1D.csv
- Figure 1/Firing Rates/
- Figure 1/Firing Rates/Firing-Rate-Mouse-1.csv
- Figure 1/Firing Rates/Firing-Rate-Mouse-2.csv
- Figure 1/Firing Rates/Firing-Rate-Mouse-3.csv
- Figure 1/Firing Rates/Firing-Rate-Mouse-4.csv
- Figure 1/Firing Rates/Firing-Rate-Mouse-5.csv
- Figure 1/Firing Rates/Firing-Rate-Mouse-6.csv
- Figure 1/Sleep Wake States/
- Figure 1/Sleep Wake States/Sleep-Wake-States-1.csv
- Figure 1/Sleep Wake States/Sleep-Wake-States-2.csv
- Figure 1/Sleep Wake States/Sleep-Wake-States-3.csv
- Figure 1/Sleep Wake States/Sleep-Wake-States-4.csv
- Figure 1/Sleep Wake States/Sleep-Wake-States-5.csv
- Figure 1/Sleep Wake States/Sleep-Wake-States-6.csv
- Figure 1/Slow Wave Activity/
- Figure 1/Slow Wave Activity/Slow-Wave-Activity-Mouse-1.csv
- Figure 1/Slow Wave Activity/Slow-Wave-Activity-Mouse-2.csv
- Figure 1/Slow Wave Activity/Slow-Wave-Activity-Mouse-3.csv
- Figure 1/Slow Wave Activity/Slow-Wave-Activity-Mouse-4.csv
- Figure 1/Slow Wave Activity/Slow-Wave-Activity-Mouse-5.csv
- Figure 1/Slow Wave Activity/Slow-Wave-Activity-Mouse-6.csv
- Figure 1/Source Data Legend.pdf
