# Supplementary material for: Global sleep homeostasis reflects temporally and spatially integrated local cortical neuronal activity
Source: eLife. 2020 Jul 2;9:e54148. doi: 10.7554/eLife.54148 (PMC7332296; doi:10.7554/eLife.54148)
Supplement: Figure 1—source data 1. [file elife-54148-fig1-data1.zip › Figure 1/Correlation-Values-Fig1D.csv]

Mouse	LFP Channel	Wake Duration (s)	Mean Firing Rate (Hz)	Change in SWA (%)
1	1	716	78.999	71.871
1	1	568	60.713	-21.499
1	1	356	68.017	23.654
1	1	2240	74.038	17.917
1	1	784	65.788	19.882
1	1	1804	71.723	13.506
1	1	2084	86.12	56.427
1	1	24468	108.32	77.974
1	1	9628	109.99	75.154
1	1	21764	116.12	121.21
1	1	1336	98.015	-0.42482
1	1	1092	99.849	42.062
1	1	428	100.91	12.075
1	1	19840	105.65	81.112
1	1	3984	106.78	58.122
1	1	860	108.89	21.041
1	1	8532	115.91	53.253
1	2	716	47.869	80.526
1	2	568	43.403	-30.856
1	2	356	59.357	28.554
1	2	2240	56.233	21.038
1	2	784	50.149	11.089
1	2	1804	45.422	8.528
1	2	2084	59.81	50.965
1	2	24468	59.085	64.842
1	2	9628	55.32	78.332
1	2	21764	60.579	108.96
1	2	1336	38.773	0.97403
1	2	1092	40.308	56.96
1	2	428	41.629	23.713
1	2	19840	54.705	85.781
1	2	3984	51.883	72.748
1	2	860	45.531	15.823
1	2	8532	57.817	55.229
1	3	716	58.388	71.766
1	3	568	53.75	-23.937
1	3	356	52.458	22.792
1	3	2240	61.092	23.852
1	3	784	49.68	15.778
1	3	1804	46.625	12.227
1	3	2084	60.527	53.273
1	3	24468	80.595	72.386
1	3	9628	81.746	75.072
1	3	21764	105.93	132.37
1	3	1336	65.918	1.1647
1	3	1092	63.407	46.423
1	3	428	62.72	15.759
1	3	19840	93.923	88.167
1	3	3984	85.412	61.224
1	3	860	75.038	17.291
1	3	8532	88.116	51.481
1	4	716	30.054	77.394
1	4	568	31.289	-26.762
1	4	356	33.817	34.725
1	4	2240	37.611	19.199
1	4	784	35.568	12.079
1	4	1804	27.355	17.161
1	4	2084	35.984	47.302
1	4	24468	39.576	68.174
1	4	9628	54.332	70.359
1	4	21764	59.028	110.6
1	4	1336	27.953	3.4267
1	4	1092	30.001	50.052
1	4	428	32.465	20.06
1	4	19840	36.858	89.154
1	4	3984	41.539	67.72
1	4	860	44.916	14.831
1	4	8532	48.588	53.392
1	5	716	56.584	84.877
1	5	568	50.1	-30.931
1	5	356	57.098	29.327
1	5	2240	58.513	19.561
1	5	784	55.162	11.623
1	5	1804	56.523	16.861
1	5	2084	56.447	56.042
1	5	24468	82.38	60.227
1	5	9628	59.972	73.378
1	5	21764	77.908	98.03
1	5	1336	62.622	6.1714
1	5	1092	55.41	52.725
1	5	428	55.386	24.586
1	5	19840	76.389	84.916
1	5	3984	47.927	85.476
1	5	860	51.66	10.153
1	5	8532	50.038	47.105
1	6	716	38.311	79.392
1	6	568	34.665	-30.037
1	6	356	43.199	25.882
1	6	2240	44.776	25.092
1	6	784	35.173	11.918
1	6	1804	37.451	9.1393
1	6	2084	43.145	49.2
1	6	24468	43.657	64.163
1	6	9628	49.557	80.458
1	6	21764	63.273	120.59
1	6	1336	41.32	-5.3984
1	6	1092	45.218	53.589
1	6	428	42.023	20.341
1	6	19840	51.148	90.699
1	6	3984	50.844	70.037
1	6	860	51.628	17.197
1	6	8532	60.099	52.905
1	7	716	15.704	85.471
1	7	568	15.85	-30.633
1	7	356	21.747	33.964
1	7	2240	22.504	22.363
1	7	784	17.151	17.466
1	7	1804	18.055	12.204
1	7	2084	26.24	55.825
1	7	24468	26.249	65.684
1	7	9628	28.788	74.999
1	7	21764	33.768	106.01
1	7	1336	23.109	5.9207
1	7	1092	18.016	53.721
1	7	428	20.126	20.601
1	7	19840	24.139	84.624
1	7	3984	23.596	85.553
1	7	860	24.851	3.2479
1	7	8532	26.822	43.556
1	8	716	93.133	46.95
1	8	568	67.915	-14.558
1	8	356	68.303	6.3615
1	8	2240	91.028	28.162
1	8	784	74.578	3.6268
1	8	1804	72.788	11.958
1	8	2084	93.605	64.468
1	8	24468	104.72	91.607
1	8	9628	130.42	49.696
1	8	21764	146.84	58.389
1	8	1336	107.28	9.3393
1	8	1092	118.6	34.548
1	8	428	115.6	17.308
1	8	19840	131.05	71.542
1	8	3984	138.89	42.754
1	8	860	142.61	25.355
1	8	8532	148.72	57.288
1	9	716	77.251	40.436
1	9	568	51.009	-17.624
1	9	356	58.185	17.853
1	9	2240	77.782	20.011
1	9	784	62.962	-1.7547
1	9	1804	61.252	12.474
1	9	2084	83.186	48.485
1	9	24468	93.622	82.135
1	9	9628	111.4	47.75
1	9	21764	125.7	56.7
1	9	1336	83.457	5.91
1	9	1092	79.832	29.087
1	9	428	87.572	19.005
1	9	19840	106.38	63.141
1	9	3984	114.94	39.443
1	9	860	112.35	9.9826
1	9	8532	123.96	54.544
1	10	716	56.81	39.39
1	10	568	45.743	-11.127
1	10	356	50.225	12.298
1	10	2240	68.839	19.557
1	10	784	54.849	0.40124
1	10	1804	51.439	13.287
1	10	2084	70.988	39.185
1	10	24468	68.806	70.59
1	10	9628	79.179	53.196
1	10	21764	94.815	57.719
1	10	1336	61.76	6.9097
1	10	1092	64.708	33.583
1	10	428	71.105	19.311
1	10	19840	80.84	69.442
1	10	3984	82.317	35.085
1	10	860	85.898	1.6953
1	10	8532	91.697	50.134
1	11	716	65.321	53.644
1	11	568	51.384	-20.909
1	11	356	50.289	16.059
1	11	2240	75.206	29.996
1	11	784	60.552	7.4418
1	11	1804	55.864	11.404
1	11	2084	76.953	55.403
1	11	24468	83.104	98.638
1	11	9628	91.672	54.252
1	11	21764	105.82	73.174
1	11	1336	75.05	7.5361
1	11	1092	79.889	30.25
1	11	428	83.876	15.798
1	11	19840	89.653	71.008
1	11	3984	98.56	51.451
1	11	860	101	24.701
1	11	8532	110.32	62.267
1	12	716	156.73	51.875
1	12	568	130.1	-20.32
1	12	356	138.19	9.4984
1	12	2240	166.67	29.832
1	12	784	142.81	2.4688
1	12	1804	143.82	11.51
1	12	2084	170.83	41.475
1	12	24468	190.4	64.958
1	12	9628	193.43	51.551
1	12	21764	207.21	67.113
1	12	1336	169.43	6.3602
1	12	1092	181.79	30.171
1	12	428	180.6	20.113
1	12	19840	199.73	73.978
1	12	3984	192.88	43.034
1	12	860	190.57	-0.24423
1	12	8532	204.36	37.453
2	1	528	37.172	33.165
2	1	2572	40.535	34.486
2	1	1408	41.811	27.718
2	1	1772	34.875	-36.693
2	1	956	26.992	34.048
2	1	9844	37.143	40.054
2	1	480	35.533	10.04
2	1	472	34.977	-20.703
2	1	4392	45.05	38.789
2	1	1204	42.934	-3.9871
2	1	1092	45.622	-7.5137
2	1	6108	41.241	51.794
2	1	864	40.525	22.09
2	1	25088	42.678	99.974
2	1	900	38.073	2.6775
2	1	1496	32.957	83.146
2	1	1232	37.22	-27.814
2	1	12888	34.604	20.284
2	1	752	35.02	13.599
2	1	1328	35.954	-36.359
2	1	932	39.514	-36.063
2	1	1860	35.272	17.092
2	1	788	27.485	30.753
2	1	840	38.93	-8.7879
2	2	528	12.712	38.703
2	2	2572	17.861	17.098
2	2	1408	17.369	27.51
2	2	1772	13.751	-39.459
2	2	956	9.6736	16.736
2	2	9844	18.794	29.525
2	2	480	14.969	5.8517
2	2	472	16.754	-9.2273
2	2	4392	26.659	30.731
2	2	1204	23.894	4.1341
2	2	1092	23.557	-10.722
2	2	6108	23.494	30.353
2	2	864	20.003	10.741
2	2	25088	36.932	78.127
2	2	900	25.507	-8.806
2	2	1496	20.039	73.727
2	2	1232	22.666	-40.094
2	2	12888	20.832	-3.8813
2	2	752	21.108	-1.299
2	2	1328	24.66	-36.24
2	2	932	28.288	-28.715
2	2	1860	24.502	13.39
2	2	788	14.284	25.577
2	2	840	17.736	-17.504
2	3	528	25.345	29.536
2	3	2572	32.617	36.691
2	3	1408	37.696	25.573
2	3	1772	28.102	-40.735
2	3	956	14.725	30.1
2	3	9844	21.216	40.066
2	3	480	29.144	8.1296
2	3	472	17.373	-19.042
2	3	4392	31.171	40.431
2	3	1204	34.175	-3.453
2	3	1092	38.295	-8.8508
2	3	6108	25.284	49.38
2	3	864	38.042	19.315
2	3	25088	38.095	98.056
2	3	900	41.717	3.6578
2	3	1496	29.618	83.456
2	3	1232	43.584	-39.408
2	3	12888	22.806	11.8
2	3	752	40.356	5.8436
2	3	1328	37.084	-49.617
2	3	932	42.438	-35.001
2	3	1860	30.696	17.069
2	3	788	16.995	34.182
2	3	840	34.445	-13.116
2	4	528	24.648	29.182
2	4	2572	34.082	26.988
2	4	1408	33.781	22.523
2	4	1772	26.697	-42.308
2	4	956	18.889	20.417
2	4	9844	36.845	31.941
2	4	480	31.61	3.7658
2	4	472	28.449	-8.7792
2	4	4392	45.151	31.765
2	4	1204	41.438	6.0817
2	4	1092	44.973	-10.238
2	4	6108	42.108	44.074
2	4	864	39.841	12.27
2	4	25088	54.174	88.08
2	4	900	42.286	-11.052
2	4	1496	31.626	79.317
2	4	1232	38.155	-45.774
2	4	12888	37.161	-0.2887
2	4	752	38.32	2.4865
2	4	1328	40.477	-53.525
2	4	932	48.519	-31.918
2	4	1860	40.655	17.23
2	4	788	24.525	31.049
2	4	840	34.713	-18.39
2	5	528	2.9981	29.205
2	5	2572	5.1928	29.829
2	5	1408	7.2791	25.587
2	5	1772	4.759	-42.843
2	5	956	1.2333	25.565
2	5	9844	5.5458	39.389
2	5	480	6.0708	12.107
2	5	472	2.5932	-17.432
2	5	4392	7.7976	42.919
2	5	1204	7.2176	-5.9131
2	5	1092	11.638	-7.0583
2	5	6108	7.1105	49.13
2	5	864	8.3484	18.873
2	5	25088	8.4936	95.834
2	5	900	9.4367	-4.6793
2	5	1496	6.7146	96.116
2	5	1232	11.681	-41.224
2	5	12888	7.1262	8.3741
2	5	752	10.968	-0.72756
2	5	1328	9.2274	-56.86
2	5	932	11.108	-37.491
2	5	1860	7.9263	15.344
2	5	788	3.3135	31.969
2	5	840	8.9	-15.802
2	6	528	7.9602	29.895
2	6	2572	12.74	30.981
2	6	1408	14.135	30.99
2	6	1772	10.132	-38.915
2	6	956	5.0554	9.0725
2	6	9844	16.873	36.536
2	6	480	15.435	3.5751
2	6	472	9.7733	-12.356
2	6	4392	20.108	35.435
2	6	1204	17.501	6.5782
2	6	1092	20.468	-6.1009
2	6	6108	20.094	41.938
2	6	864	16.485	10.067
2	6	25088	23.384	79.09
2	6	900	18.154	-12.717
2	6	1496	10.298	70.411
2	6	1232	16.727	-37.507
2	6	12888	19.064	-7.3631
2	6	752	20.613	6.0838
2	6	1328	18.87	-40.34
2	6	932	22.435	-31.533
2	6	1860	15.254	18.94
2	6	788	6.9239	26.166
2	6	840	14.117	-25.143
2	7	528	19.328	25.867
2	7	2572	24.184	19.594
2	7	1408	18.999	24.167
2	7	1772	13.902	-47.438
2	7	956	16.667	27.662
2	7	9844	16.734	32.9
2	7	480	18.677	8.9099
2	7	472	20.025	-11.812
2	7	4392	18.428	37.341
2	7	1204	23.457	-4.6519
2	7	1092	15.489	-1.639
2	7	6108	14.842	44.678
2	7	864	13.513	15.915
2	7	25088	24.016	83.036
2	7	900	15.98	-7.3491
2	7	1496	14.077	95.232
2	7	1232	16.958	-49.97
2	7	12888	10.165	0.42607
2	7	752	9.6955	4.4604
2	7	1328	13.315	-59.969
2	7	932	14.443	-39.458
2	7	1860	11.398	10.306
2	7	788	9.75	35.358
2	7	840	9.3512	-19.769
2	8	528	14.063	31.442
2	8	2572	19.832	30.269
2	8	1408	22.759	34.415
2	8	1772	19.125	-34.082
2	8	956	12.196	8.4995
2	8	9844	23.475	37.221
2	8	480	28.929	7.0808
2	8	472	19.578	-8.5877
2	8	4392	27.773	40.554
2	8	1204	28.955	0.71489
2	8	1092	35.602	-3.6682
2	8	6108	26.997	44.904
2	8	864	29.978	18.277
2	8	25088	32.85	89.263
2	8	900	26.718	-6.2807
2	8	1496	16.873	69.726
2	8	1232	27.002	-32.011
2	8	12888	24.951	-2.7452
2	8	752	32.565	9.3535
2	8	1328	27.553	-26.439
2	8	932	33.563	-28.618
2	8	1860	25.739	24.319
2	8	788	13.868	19.603
2	8	840	25.669	-19.578
2	9	528	48.629	25.201
2	9	2572	54.136	35.299
2	9	1408	61.696	32.14
2	9	1772	53.228	-35.757
2	9	956	41.628	35.685
2	9	9844	46.837	34.403
2	9	480	48.715	16.2
2	9	472	43.358	-18.99
2	9	4392	57.438	36.514
2	9	1204	56.687	4.144
2	9	1092	58.614	-7.0279
2	9	6108	45.197	45.817
2	9	864	48.896	12.677
2	9	25088	55.243	77.037
2	9	900	57.326	6.1072
2	9	1496	49.509	99.853
2	9	1232	53.86	-38.411
2	9	12888	48.772	17.326
2	9	752	56.48	15.611
2	9	1328	56.375	-58.319
2	9	932	59.541	-40.042
2	9	1860	55.726	19.23
2	9	788	42.629	40.397
2	9	840	58.711	-5.7243
2	10	528	42.676	35.051
2	10	2572	46.999	54.532
2	10	1408	51.766	41.672
2	10	1772	52.339	-24.579
2	10	956	42.679	28.265
2	10	9844	57.366	64.231
2	10	480	48.194	7.0873
2	10	472	40.511	-19.23
2	10	4392	55.132	51.4
2	10	1204	53.445	-3.4883
2	10	1092	56.762	-13.165
2	10	6108	58.559	66.458
2	10	864	49.325	19.346
2	10	25088	45.912	117.35
2	10	900	37.33	-0.40288
2	10	1496	33.902	61.917
2	10	1232	40.737	-10.095
2	10	12888	54.058	40.674
2	10	752	49.137	23.773
2	10	1328	44.333	0.44384
2	10	932	44.973	-25.902
2	10	1860	47.96	36.079
2	10	788	31.114	18.761
2	10	840	44.035	-3.4704
2	11	528	18.742	22.829
2	11	2572	24.36	33.471
2	11	1408	25.343	24.292
2	11	1772	20.639	-45.716
2	11	956	15.212	33.558
2	11	9844	23.644	24.908
2	11	480	22.204	12.769
2	11	472	15.691	-18.259
2	11	4392	28.542	27.681
2	11	1204	25.644	12.618
2	11	1092	27.682	-11.524
2	11	6108	25.606	46.093
2	11	864	23.15	11.317
2	11	25088	31.49	68.242
2	11	900	26.036	-1.811
2	11	1496	19.102	106.6
2	11	1232	25.277	-45.956
2	11	12888	24.182	3.2892
2	11	752	26.867	5.6834
2	11	1328	25.765	-67.228
2	11	932	30.902	-39.124
2	11	1860	25.118	17.423
2	11	788	12.964	40.946
2	11	840	22.638	-10.953
2	12	528	63.072	27.119
2	12	2572	68.367	54.606
2	12	1408	69.29	41.74
2	12	1772	64.19	-24.966
2	12	956	48.477	33.032
2	12	9844	57.053	61.442
2	12	480	56.706	13.281
2	12	472	49.85	-32.019
2	12	4392	63.597	52.766
2	12	1204	60.042	-6.4549
2	12	1092	69.913	-2.5537
2	12	6108	58.648	71.305
2	12	864	59.941	26.878
2	12	25088	55.591	105.09
2	12	900	56.687	8.6968
2	12	1496	47.937	78.999
2	12	1232	56.276	-20.64
2	12	12888	51.579	33.153
2	12	752	56.967	23.73
2	12	1328	52.865	-17.382
2	12	932	63.727	-25.032
2	12	1860	57.488	29.572
2	12	788	42.072	31.417
2	12	840	57.427	-6.685
2	13	528	6.1648	25.608
2	13	2572	11.033	28.226
2	13	1408	12.783	24.484
2	13	1772	10.564	-44.447
2	13	956	5.0481	28.231
2	13	9844	14.8	24.761
2	13	480	11.59	11.32
2	13	472	7.9068	-15.465
2	13	4392	20.085	29.081
2	13	1204	18.752	3.8341
2	13	1092	21.217	-3.396
2	13	6108	21.589	43.406
2	13	864	15.148	12.286
2	13	25088	23.727	65.685
2	13	900	18.687	-0.22126
2	13	1496	13.888	108.48
2	13	1232	19.339	-43.277
2	13	12888	19.735	2.2253
2	13	752	18.101	5.3813
2	13	1328	16.468	-76.124
2	13	932	20.896	-36.221
2	13	1860	18.93	17.728
2	13	788	6.8591	41.307
2	13	840	14.852	-4.1409
2	14	528	34.231	34.495
2	14	2572	30.481	43.446
2	14	1408	33.661	38.588
2	14	1772	29.54	-23.925
2	14	956	23.75	32.549
2	14	9844	22.04	53.83
2	14	480	26.087	11.352
2	14	472	25.636	-22.363
2	14	4392	26.029	43.79
2	14	1204	29.948	-2.1122
2	14	1092	31.166	-5.7809
2	14	6108	22.412	58.13
2	14	864	35.606	20.75
2	14	25088	28.805	95.093
2	14	900	26.899	2.5794
2	14	1496	23.783	87.517
2	14	1232	28.838	-20.79
2	14	12888	22.708	22.728
2	14	752	29.75	26.958
2	14	1328	28.471	-23.681
2	14	932	29.412	-28.063
2	14	1860	29.492	27.188
2	14	788	22.845	36.639
2	14	840	29.542	-2.2981
2	15	528	11.777	27.231
2	15	2572	16.852	27.5
2	15	1408	20.768	19.448
2	15	1772	16.487	-51.622
2	15	956	9.6956	30.382
2	15	9844	20.727	22.128
2	15	480	21.66	9.1331
2	15	472	10.841	-18.085
2	15	4392	23.95	31.721
2	15	1204	23.879	1.7247
2	15	1092	29.823	-3.3411
2	15	6108	24.018	40.027
2	15	864	23.486	15.398
2	15	25088	27.991	58.881
2	15	900	29.428	3.8243
2	15	1496	19.9	113.52
2	15	1232	30.921	-46.686
2	15	12888	27.165	-7.3806
2	15	752	31.988	1.5246
2	15	1328	26.383	-88.936
2	15	932	29.845	-38.485
2	15	1860	23.229	14.648
2	15	788	10.704	45.199
2	15	840	22.614	-15.14
2	16	528	17.347	24.203
2	16	2572	20.591	31.658
2	16	1408	19.139	30.342
2	16	1772	14.828	-45.348
2	16	956	10.786	32.224
2	16	9844	12.304	37.919
2	16	480	12.908	10.633
2	16	472	12.263	-19.06
2	16	4392	17.666	38.914
2	16	1204	19.497	1.3159
2	16	1092	17.853	-9.5025
2	16	6108	14.944	48.377
2	16	864	15.323	16.48
2	16	25088	19.898	90.664
2	16	900	19.088	-0.67888
2	16	1496	14.164	100.61
2	16	1232	15.055	-40.638
2	16	12888	12.652	16.12
2	16	752	13.303	9.8056
2	16	1328	14.698	-54.369
2	16	932	18.54	-37.554
2	16	1860	17.412	17.041
2	16	788	13.282	43.757
2	16	840	17.049	-11.701
3	1	1268	13.789	-19.413
3	1	1116	13.455	16.849
3	1	1652	14.005	35.984
3	1	884	18.577	15.931
3	1	1660	11.473	28.436
3	1	696	7.2989	10.146
3	1	16948	18.882	89.323
3	1	1068	15.158	22.735
3	1	7536	15.962	52.88
3	1	1488	13.21	-30.14
3	1	2592	17.451	100.54
3	1	1572	9.2786	-30.129
3	1	23624	16.31	96.397
3	1	888	21.617	7.0376
3	1	900	20.376	15.524
3	1	836	20.764	30.509
3	1	540	28.17	37.883
3	1	1052	17.325	20.085
3	1	12144	15.427	41.786
3	1	744	31.351	24.984
3	1	12296	17.449	64.186
3	1	2832	25.796	72.461
3	1	1376	24.544	-41.56
3	2	1268	3.4338	7.0666
3	2	1116	2.6129	17.678
3	2	1652	2.5406	34.967
3	2	884	3.0011	23.054
3	2	1660	2.8265	31.422
3	2	696	3.4684	-5.1366
3	2	16948	5.6768	74.132
3	2	1068	2.8699	0.14211
3	2	7536	4.6336	46.415
3	2	1488	4.9872	-25.693
3	2	2592	6.1667	68.937
3	2	1572	3.5013	-24.809
3	2	23624	10.049	99.581
3	2	888	4.4752	1.3705
3	2	900	4.2656	16.821
3	2	836	3.1352	21.532
3	2	540	2.4389	32.463
3	2	1052	3.0827	4.5751
3	2	12144	4.9638	36.174
3	2	744	2.7298	26.222
3	2	12296	8.2268	59.573
3	2	2832	6.0297	66.572
3	2	1376	6.2376	-40.934
3	3	1268	2.4976	4.9495
3	3	1116	2.1559	22.316
3	3	1652	2.2978	38.621
3	3	884	4.0362	21.047
3	3	1660	2.7024	30.147
3	3	696	1.602	8.9352
3	3	16948	6.2042	84.056
3	3	1068	4.7313	8.2327
3	3	7536	5.8473	60.974
3	3	1488	4.1882	-21.428
3	3	2592	5.9225	79.378
3	3	1572	3.1291	-14.392
3	3	23624	8.5263	118.18
3	3	888	8.5462	-0.71592
3	3	900	7.1933	18.237
3	3	836	7.299	27.235
3	3	540	7.1315	46.828
3	3	1052	5.9477	5.9357
3	3	12144	6.4837	49.431
3	3	744	9.0081	24.025
3	3	12296	7.3976	68.55
3	3	2832	8.2479	76.984
3	3	1376	7.6105	-38.479
3	4	1268	2.8194	15.846
3	4	1116	2.2437	20.767
3	4	1652	2.3929	30.851
3	4	884	2.7149	24.975
3	4	1660	2.0193	21.246
3	4	696	1.9598	-8.1199
3	4	16948	4.128	79.722
3	4	1068	3.5524	-3.8674
3	4	7536	4.4602	53.126
3	4	1488	3.0054	-31.932
3	4	2592	4.7816	62.73
3	4	1572	3.0674	-42.923
3	4	23624	6.077	105.91
3	4	888	4.7038	2.0015
3	4	900	4.8667	23.371
3	4	836	3.3481	21.911
3	4	540	3.1111	27.508
3	4	1052	3.3726	1.1981
3	4	12144	4.5992	34.225
3	4	744	5.3011	26.301
3	4	12296	5.843	54.061
3	4	2832	6.5067	50.883
3	4	1376	6.4302	-32.367
3	5	1268	2.5505	-2.6404
3	5	1116	2.5699	19.826
3	5	1652	2.8674	41.051
3	5	884	5.2511	18.705
3	5	1660	2.2163	33.356
3	5	696	0.70977	10.376
3	5	16948	4.6415	78.827
3	5	1068	4.5506	9.7999
3	5	7536	5.2199	60.775
3	5	1488	3.4671	-30.662
3	5	2592	5.0548	87.045
3	5	1572	2.0312	-35.503
3	5	23624	3.4868	164.45
3	5	888	3.3468	8.4846
3	5	900	4.1289	26.16
3	5	836	4.1555	27.417
3	5	540	6.6185	47.173
3	5	1052	3.1587	14.795
3	5	12144	3.7782	37.603
3	5	744	9.2097	21.039
3	5	12296	4.9612	84.178
3	5	2832	6.7044	82.422
3	5	1376	5.7471	-45.06
3	6	1268	28.535	11.931
3	6	1116	20.4	21.01
3	6	1652	23.27	25.603
3	6	884	20.316	20.542
3	6	1660	17.135	21.018
3	6	696	24.333	-8.7769
3	6	16948	28.519	74.542
3	6	1068	23.419	-6.7499
3	6	7536	26.74	33.365
3	6	1488	20.655	-45.208
3	6	2592	29.102	64.02
3	6	1572	20.022	-42.301
3	6	23624	48.787	90.377
3	6	888	32.029	-5.5346
3	6	900	31.353	20.031
3	6	836	24.702	15.465
3	6	540	19.28	30.378
3	6	1052	22.977	-5.4393
3	6	12144	31.278	29.794
3	6	744	17.723	17.181
3	6	12296	40.859	44.374
3	6	2832	39.512	53.249
3	6	1376	46.609	-27.458
3	7	1268	21.417	19.625
3	7	1116	17.001	21.176
3	7	1652	17.364	30.45
3	7	884	19.363	28.653
3	7	1660	18.728	20.768
3	7	696	16.843	-11.523
3	7	16948	37.856	74.565
3	7	1068	20.14	-10.286
3	7	7536	33.546	28.59
3	7	1488	27.649	-56.004
3	7	2592	28.283	74.381
3	7	1572	24.699	-62.959
3	7	23624	49.93	100.52
3	7	888	28.343	0.30194
3	7	900	28.591	22.734
3	7	836	26.739	18.075
3	7	540	20.55	42.306
3	7	1052	25.476	-10.147
3	7	12144	46.983	31.039
3	7	744	23.044	24.564
3	7	12296	42.25	49.123
3	7	2832	38.886	46.092
3	7	1376	33.033	-36.913
3	8	1268	13.599	15.481
3	8	1116	9.2912	29.658
3	8	1652	12.711	32.623
3	8	884	10.777	27.327
3	8	1660	11.37	26.078
3	8	696	12.315	11.619
3	8	16948	19.125	87.151
3	8	1068	12.209	-3.8933
3	8	7536	17.506	46.498
3	8	1488	12.254	-36.998
3	8	2592	15.493	58.896
3	8	1572	12.15	-15.236
3	8	23624	19.253	81.962
3	8	888	11.55	12.586
3	8	900	13.672	17.859
3	8	836	14.11	17.824
3	8	540	11.956	35.729
3	8	1052	12.712	1.9249
3	8	12144	12.283	39.641
3	8	744	9.2688	25.504
3	8	12296	17.6	52.689
3	8	2832	17.647	50.454
3	8	1376	21.584	-32.404
3	9	1268	13.33	13.8
3	9	1116	10.569	25.618
3	9	1652	11.88	31.855
3	9	884	14.055	29.555
3	9	1660	12.047	26.347
3	9	696	11.073	9.6992
3	9	16948	23.245	88.194
3	9	1068	14.307	-3.3096
3	9	7536	24.248	44.748
3	9	1488	18.235	-44.652
3	9	2592	22.534	59.856
3	9	1572	19.615	-39.7
3	9	23624	30.934	71.622
3	9	888	24.586	11.209
3	9	900	23.752	19.051
3	9	836	18.14	22.567
3	9	540	17.046	41.355
3	9	1052	15.901	1.7079
3	9	12144	24.896	36.758
3	9	744	18.296	24.723
3	9	12296	25.884	47.339
3	9	2832	26.038	36.168
3	9	1376	20.706	-21.141
3	10	1268	28.058	20.384
3	10	1116	21.027	35.769
3	10	1652	21.802	33.281
3	10	884	19.158	23.628
3	10	1660	17.512	31.102
3	10	696	23.797	17.817
3	10	16948	22.04	85.651
3	10	1068	18.806	-6.0674
3	10	7536	23.528	45.863
3	10	1488	19.905	-35.104
3	10	2592	23.782	63.291
3	10	1572	19.399	-15.639
3	10	23624	43.072	75.468
3	10	888	26.983	11.625
3	10	900	22.914	21.45
3	10	836	20.374	30.479
3	10	540	16.587	40.659
3	10	1052	22.135	2.7436
3	10	12144	27.184	55.267
3	10	744	13.961	25.743
3	10	12296	23.119	53.314
3	10	2832	19.986	41.905
3	10	1376	20.501	-26.934
3	11	1268	6.4353	20.296
3	11	1116	5.5376	23.848
3	11	1652	6.4576	37.006
3	11	884	7.4378	32.261
3	11	1660	5.5898	25.975
3	11	696	4.5704	6.1268
3	11	16948	13.46	82.481
3	11	1068	8.6742	-7.2984
3	11	7536	12.852	36.802
3	11	1488	8.7466	-60.713
3	11	2592	11.728	76.484
3	11	1572	6.5038	-57.001
3	11	23624	20.123	72.738
3	11	888	10.554	10.883
3	11	900	10.441	20.812
3	11	836	10.099	26.711
3	11	540	10.856	46.947
3	11	1052	9.6625	-5.8948
3	11	12144	15.38	36.978
3	11	744	13.952	28.392
3	11	12296	13.838	42.397
3	11	2832	15.016	47.089
3	11	1376	12.761	-26.464
3	12	1268	1.6041	19.277
3	12	1116	1.2643	31.143
3	12	1652	1.4419	36.462
3	12	884	1.5577	29.634
3	12	1660	1.2627	31.64
3	12	696	1.1997	14.7
3	12	16948	1.7965	88.364
3	12	1068	2.4101	-0.55597
3	12	7536	2.38	49.657
3	12	1488	2.6505	-32.652
3	12	2592	2.5868	63.827
3	12	1572	2.9936	-18.829
3	12	23624	3.7277	73.213
3	12	888	2.2984	12.315
3	12	900	2.8622	21.927
3	12	836	2.1041	25.585
3	12	540	1.8778	36.275
3	12	1052	1.7158	0.48156
3	12	12144	2.2134	48.039
3	12	744	2.3495	23.311
3	12	12296	3.2203	57.458
3	12	2832	2.8397	50.532
3	12	1376	2.6344	-33.61
4	1	328	2.7591	20.671
4	1	1664	7.5451	49.732
4	1	1712	7.809	15.207
4	1	820	7.2488	15.252
4	1	1952	6.8233	31.848
4	1	316	1.1456	2.3076
4	1	520	5.7846	-5.1431
4	1	2080	4.2404	45.989
4	1	25184	2.8427	172.92
4	1	1256	4.6115	-60.004
4	1	1892	7.0581	91.408
4	1	360	2.1028	-17.653
4	1	2416	4.9404	87.416
4	1	21552	6.4771	63.429
4	1	848	3.8703	-14.501
4	1	504	2.9107	10.118
4	1	1100	2.0155	12.713
4	1	504	2.7024	20.27
4	1	13580	2.458	48.611
4	1	556	3.7374	-14.585
4	1	640	5.7375	-13.037
4	1	568	2.1901	-5.3723
4	1	812	3.0062	-2.0635
4	1	15932	2.8578	57.704
4	1	720	3.8458	7.3096
4	2	328	13.058	13.172
4	2	1664	31.056	62.639
4	2	1712	29.382	27.2
4	2	820	29.55	21.613
4	2	1952	22.533	31.898
4	2	316	11.991	13.812
4	2	520	32.081	3.8581
4	2	2080	22.533	35.297
4	2	25184	16.309	157.99
4	2	1256	32.478	-52.344
4	2	1892	42.794	84.405
4	2	360	18.2	-7.3205
4	2	2416	33.82	87.612
4	2	21552	39.701	66.843
4	2	848	25.777	3.2907
4	2	504	28.76	12.745
4	2	1100	18.855	12.949
4	2	504	25.917	9.3906
4	2	13580	20.591	43.818
4	2	556	30.948	-21.265
4	2	640	34.619	-12.55
4	2	568	21.956	0.11063
4	2	812	27.514	-7.6093
4	2	15932	24.6	58.756
4	2	720	34.987	7.0284
4	3	328	22.311	14.806
4	3	1664	43.203	68.192
4	3	1712	37.633	31.396
4	3	820	38.313	23.445
4	3	1952	29.86	26.465
4	3	316	29.557	11.553
4	3	520	45.146	-0.24811
4	3	2080	28.678	36.785
4	3	25184	19.802	171.15
4	3	1256	40.236	-57.756
4	3	1892	48.398	79.188
4	3	360	23.217	-7.7321
4	3	2416	38.416	94.523
4	3	21552	46.595	83.645
4	3	848	35.157	5.0067
4	3	504	41.171	16.459
4	3	1100	26.917	10.258
4	3	504	33.685	12.837
4	3	13580	25.111	44.408
4	3	556	42.025	-22.286
4	3	640	45.798	-14.658
4	3	568	29.773	2.1597
4	3	812	35.97	-7.0419
4	3	15932	31.848	66.694
4	3	720	44.039	12.484
4	4	328	26.543	15.078
4	4	1664	47.131	44.58
4	4	1712	47.669	4.8733
4	4	820	43.665	9.9459
4	4	1952	37.87	55.536
4	4	316	21.373	14.295
4	4	520	48.796	-8.3713
4	4	2080	35.615	47.496
4	4	25184	28.236	135.14
4	4	1256	35.537	-33.425
4	4	1892	41.218	77.053
4	4	360	24.919	-22.917
4	4	2416	46.227	84.283
4	4	21552	39.864	-3.1854
4	4	848	27.442	-4.9948
4	4	504	25.899	17.035
4	4	1100	19.356	11.326
4	4	504	25.167	14.025
4	4	13580	18.485	49.277
4	4	556	25.606	-7.42
4	4	640	29.295	-14.727
4	4	568	15.891	-0.62448
4	4	812	22.522	-4.5919
4	4	15932	22.887	64.45
4	4	720	27.482	2.7112
4	5	328	18.476	17.905
4	5	1664	25.813	74.89
4	5	1712	24.954	3.4247
4	5	820	21.627	16.129
4	5	1952	18.594	39.821
4	5	316	9.7627	9.7191
4	5	520	19.988	1.9481
4	5	2080	19.04	53.387
4	5	25184	28.58	136.33
4	5	1256	34.404	-25.823
4	5	1892	35.624	76.35
4	5	360	12.644	-28.547
4	5	2416	27.623	83.8
4	5	21552	28.262	33.839
4	5	848	16.377	-20.65
4	5	504	13.669	19.458
4	5	1100	13.361	31.345
4	5	504	16.482	24.745
4	5	13580	22.242	68.023
4	5	556	17.61	-6.0753
4	5	640	22.609	-10.751
4	5	568	13.364	1.4219
4	5	812	19.33	-2.7236
4	5	15932	20.216	78.766
4	5	720	16.6	8.0981
4	6	328	41.354	36.907
4	6	1664	59.795	71.09
4	6	1712	69.041	3.0704
4	6	820	64.61	8.8637
4	6	1952	55.067	43.995
4	6	316	38.703	8.7605
4	6	520	72.248	-8.9343
4	6	2080	59.459	54.53
4	6	25184	44.133	152.16
4	6	1256	57.818	-37.355
4	6	1892	60.655	86.017
4	6	360	44.206	-28.166
4	6	2416	52.423	94.694
4	6	21552	55.52	75.601
4	6	848	62.087	-23.52
4	6	504	62.472	11.897
4	6	1100	57.326	20.138
4	6	504	73.421	36.232
4	6	13580	42.719	80.082
4	6	556	76.849	-13.947
4	6	640	74.267	-0.9396
4	6	568	62.984	-2.0433
4	6	812	54.913	-9.5672
4	6	15932	49.735	76.062
4	6	720	63.529	0.96187
4	7	328	42.78	19.75
4	7	1664	52.386	71.21
4	7	1712	56.706	15.569
4	7	820	44.006	17.635
4	7	1952	47.825	48.244
4	7	316	24.731	12.899
4	7	520	41.59	5.6843
4	7	2080	44.551	57.11
4	7	25184	54.822	165.51
4	7	1256	62.948	-57.711
4	7	1892	62.392	74.346
4	7	360	40.956	-25.422
4	7	2416	56.168	64.531
4	7	21552	58.429	61.734
4	7	848	54.851	-23.576
4	7	504	41.891	7.5812
4	7	1100	46.706	28.754
4	7	504	42.962	3.2971
4	7	13580	53.238	25.242
4	7	556	52.622	2.3024
4	7	640	55.603	-12.636
4	7	568	47.437	14.518
4	7	812	52.55	-12.778
4	7	15932	52.195	49.462
4	7	720	50.589	7.1157
4	8	328	11.555	11.566
4	8	1664	23.406	90.989
4	8	1712	17.961	26.504
4	8	820	14.006	15.397
4	8	1952	14.295	45.985
4	8	316	6.9842	17.667
4	8	520	12.713	2.1301
4	8	2080	12.25	67.233
4	8	25184	15.672	182.21
4	8	1256	17.322	-63.782
4	8	1892	19.051	110.9
4	8	360	12.731	-31.07
4	8	2416	23.803	95.997
4	8	21552	24.623	67.55
4	8	848	13.52	-26.303
4	8	504	13.548	31.07
4	8	1100	11.89	25.257
4	8	504	10.246	55.944
4	8	13580	15.985	71.401
4	8	556	17.525	-13.198
4	8	640	20.295	-8.9432
4	8	568	14.697	-1.3316
4	8	812	16.959	-1.7531
4	8	15932	17.647	87.53
4	8	720	15.976	20.272
4	9	328	30.753	18.926
4	9	1664	67.447	68.58
4	9	1712	63.974	7.0166
4	9	820	48.091	6.6882
4	9	1952	55.541	41.85
4	9	316	26.263	10.994
4	9	520	50.758	-5.3425
4	9	2080	58.516	50.691
4	9	25184	54.34	112.4
4	9	1256	60.793	-23.967
4	9	1892	68.822	67.013
4	9	360	38.756	-27.589
4	9	2416	62.647	75.275
4	9	21552	54.637	71.171
4	9	848	56.46	-4.7164
4	9	504	49.631	16.67
4	9	1100	54.449	18.943
4	9	504	55.506	16.096
4	9	13580	57.262	58.087
4	9	556	61.977	-17.879
4	9	640	74.117	-4.4998
4	9	568	53.25	0.8701
4	9	812	57.275	-7.5919
4	9	15932	57.159	55.484
4	9	720	57.822	5.8451
4	10	328	26.771	16.723
4	10	1664	42.416	44.319
4	10	1712	35.72	-1.4201
4	10	820	30.509	31.833
4	10	1952	35.306	33.545
4	10	316	14.231	0.98692
4	10	520	24.504	-3.5695
4	10	2080	29.56	48.497
4	10	25184	39.652	91.964
4	10	1256	48.214	-29.458
4	10	1892	52.1	61.664
4	10	360	28.903	-11.362
4	10	2416	42.895	54.329
4	10	21552	40.251	27.481
4	10	848	29.007	-6.8713
4	10	504	14.51	14.695
4	10	1100	24.147	20.486
4	10	504	19.804	25.13
4	10	13580	29.144	42.035
4	10	556	32.552	8.7323
4	10	640	36.664	15.744
4	10	568	27.319	-18.765
4	10	812	28.287	17.399
4	10	15932	27.736	24.615
4	10	720	29.579	8.4541
5	1	2412	93.96	53.279
5	1	852	81.613	1.2768
5	1	1780	95.175	17.24
5	1	432	81.345	10.153
5	1	1668	81.977	20.791
5	1	744	83.001	-22.054
5	1	684	68.908	1.2061
5	1	532	73.932	26.258
5	1	28380	101.4	167.03
5	1	4308	119.91	-20.642
5	1	604	95.627	-23.038
5	1	10252	108.61	14.605
5	1	11904	104.83	100.28
5	1	756	72.247	-12.54
5	1	396	64.904	9.1098
5	1	1008	67.104	11.383
5	1	19092	107.13	42.087
5	1	15768	117	32.844
5	1	760	97.522	15.076
5	2	2412	92.109	22.899
5	2	852	78.697	18.803
5	2	1780	85.967	-0.054187
5	2	432	83.37	15.063
5	2	1668	83.576	11.509
5	2	744	69.055	-4.4461
5	2	684	64.135	12.382
5	2	532	62.893	23.652
5	2	28380	103.2	77.736
5	2	4308	111.59	10.326
5	2	604	83.972	-1.6345
5	2	10252	114.95	44.624
5	2	11904	115.07	38.194
5	2	756	70.876	17.682
5	2	396	60.77	16.247
5	2	1008	57.874	24.96
5	2	19092	101.53	57.785
5	2	15768	113.09	27.679
5	2	760	81.074	28.234
5	3	2412	39.98	50.433
5	3	852	31.327	4.0967
5	3	1780	40.587	28.653
5	3	432	30.419	10.417
5	3	1668	30.965	11.186
5	3	744	30.667	-16.198
5	3	684	22.232	2.0157
5	3	532	25.821	27.534
5	3	28380	43.894	135.92
5	3	4308	56.844	-3.5468
5	3	604	41.772	-14.943
5	3	10252	52.405	16.783
5	3	11904	54.611	81.828
5	3	756	36.401	3.1803
5	3	396	27.629	11.591
5	3	1008	25.784	11.726
5	3	19092	44.735	50.862
5	3	15768	52.029	45.206
5	3	760	48.943	30.973
5	4	2412	30.714	47.057
5	4	852	20.398	9.1754
5	4	1780	31.597	20.029
5	4	432	16.891	16.251
5	4	1668	17.695	7.9375
5	4	744	12.516	-7.1673
5	4	684	9.6316	5.051
5	4	532	9.6673	26.297
5	4	28380	55.632	124.45
5	4	4308	62.747	8.6906
5	4	604	36.823	5.3236
5	4	10252	60.608	29.725
5	4	11904	65.207	60.725
5	4	756	41.231	17.698
5	4	396	17.611	22.622
5	4	1008	25.242	17.639
5	4	19092	65.668	49.524
5	4	15768	73.01	40.734
5	4	760	42.17	27.489
5	5	2412	50.139	39.962
5	5	852	43.426	16.997
5	5	1780	49.182	17.035
5	5	432	46.042	5.3158
5	5	1668	51.33	13.307
5	5	744	52.546	-3.3836
5	5	684	44.246	15.981
5	5	532	58.31	12.901
5	5	28380	45.935	148.57
5	5	4308	46.625	-33.468
5	5	604	42.022	-2.0827
5	5	10252	57.533	57.89
5	5	11904	52.541	64.775
5	5	756	30.825	30.799
5	5	396	30.263	10.881
5	5	1008	28.128	18.114
5	5	19092	56.229	77.173
5	5	15768	64.518	32.802
5	5	760	36.343	23.432
5	6	2412	69.01	31.769
5	6	852	52.126	9.2621
5	6	1780	61.311	11.244
5	6	432	38.426	12.544
5	6	1668	39.706	16.285
5	6	744	29.429	-7.0606
5	6	684	26.949	14.845
5	6	532	25.404	24.781
5	6	28380	94.333	93.222
5	6	4308	99.789	9.7072
5	6	604	66.515	0.9946
5	6	10252	97.965	28.206
5	6	11904	101.98	62.635
5	6	756	62.484	25.878
5	6	396	39.515	15.572
5	6	1008	49.071	25.517
5	6	19092	99.062	43.078
5	6	15768	108.12	31.164
5	6	760	72.861	28.172
5	7	2412	98.014	44.84
5	7	852	77.347	20.798
5	7	1780	89.248	24.314
5	7	432	74.676	1.8127
5	7	1668	77.08	18.726
5	7	744	67.665	-13.619
5	7	684	58.947	19.666
5	7	532	78.942	17.639
5	7	28380	126.93	155.08
5	7	4308	118.02	-19.263
5	7	604	74.31	11.427
5	7	10252	123.66	72.082
5	7	11904	119.99	54.211
5	7	756	76.012	25.547
5	7	396	71.593	12.481
5	7	1008	65.453	22.497
5	7	19092	127.14	68.787
5	7	15768	128.47	37.967
5	7	760	78.163	14.234
5	8	2412	42.25	53.61
5	8	852	40.277	7.4792
5	8	1780	45.693	18.227
5	8	432	35.87	11.815
5	8	1668	41.612	14.426
5	8	744	33.931	-8.0811
5	8	684	37.516	10.918
5	8	532	35.654	26.712
5	8	28380	51.574	177.75
5	8	4308	47.071	30.758
5	8	604	38.197	27.526
5	8	10252	47.722	16.574
5	8	11904	50.231	70.492
5	8	756	39.476	-13.622
5	8	396	35.793	21.155
5	8	1008	40.883	-4.2257
5	8	19092	54.8	82.591
5	8	15768	45.886	36.135
5	8	760	31.728	25.198
5	9	2412	49.483	62.016
5	9	852	40.593	11.958
5	9	1780	57.056	25.16
5	9	432	44.058	17.05
5	9	1668	49.357	10.178
5	9	744	47.614	-16.849
5	9	684	37.746	4.8955
5	9	532	32.977	29.494
5	9	28380	49.317	202.34
5	9	4308	61.38	6.3561
5	9	604	52.672	2.8839
5	9	10252	57.598	43.638
5	9	11904	58.513	60.312
5	9	756	53.556	-1.9153
5	9	396	36.838	34.029
5	9	1008	39.936	3.4131
5	9	19092	53.533	82.215
5	9	15768	55.39	27.397
5	9	760	61.536	22.068
5	10	2412	35.847	65.762
5	10	852	26.876	1.6833
5	10	1780	37.217	28.663
5	10	432	21.97	8.3055
5	10	1668	24.455	35.653
5	10	744	18.224	-5.7113
5	10	684	16.231	10.539
5	10	532	20.222	26.865
5	10	28380	51.928	198.6
5	10	4308	50.154	-1.6683
5	10	604	35.315	3.025
5	10	10252	48.126	42.916
5	10	11904	48.147	39.752
5	10	756	38.858	-1.8401
5	10	396	26.598	3.1127
5	10	1008	29.258	4.8257
5	10	19092	54.01	88.815
5	10	15768	55.366	39.673
5	10	760	37.955	19.839
5	11	2412	45.636	50.615
5	11	852	45.633	2.4448
5	11	1780	48.865	24.512
5	11	432	46.329	12.942
5	11	1668	51.109	15.735
5	11	744	51.312	-14.733
5	11	684	49.718	11.232
5	11	532	50.586	28.393
5	11	28380	47.074	167.23
5	11	4308	52.795	35.002
5	11	604	40.012	41.877
5	11	10252	49.672	22.725
5	11	11904	50.083	56.588
5	11	756	38.168	3.6357
5	11	396	28.682	23.162
5	11	1008	38.033	0.42373
5	11	19092	42.301	75.986
5	11	15768	49.333	23.945
5	11	760	38.75	26.837
5	12	2412	37.231	67.316
5	12	852	34.604	18.897
5	12	1780	34.574	12.838
5	12	432	31.123	6.3276
5	12	1668	34.456	27.401
5	12	744	32.644	-7.1858
5	12	684	31.648	13.185
5	12	532	33.118	30.87
5	12	28380	48.708	192.15
5	12	4308	47.755	12.094
5	12	604	35.169	6.6028
5	12	10252	42.327	58.129
5	12	11904	37.233	35.896
5	12	756	31.511	-13.633
5	12	396	28.619	-2.2791
5	12	1008	31.277	16.606
5	12	19092	41.756	89.14
5	12	15768	41.284	27.802
5	12	760	30.639	15.659
6	1	1460	21.492	22.302
6	1	932	25.17	25.612
6	1	564	26.183	-1.8892
6	1	704	25.852	-8.6411
6	1	1080	22.485	2.4421
6	1	1372	23.499	45.195
6	1	2376	22.673	-12.532
6	1	440	13.47	0.99456
6	1	34400	18.09	134.12
6	1	25404	30.845	96.411
6	1	360	22.386	25.677
6	1	888	20.082	14.173
6	1	508	18.136	19.187
6	1	900	17.659	18.183
6	1	912	21.371	37.511
6	1	15192	21.856	38.174
6	1	8712	25.453	126.8
6	1	1808	35.481	96.408
6	1	1096	31.827	-5.1431
6	1	3332	35.176	80.623
6	2	1460	8.4062	13.636
6	2	932	7.4721	10.356
6	2	564	7.1915	-2.3196
6	2	704	8.5114	-13.507
6	2	1080	7.1407	5.7519
6	2	1372	9.0612	34.113
6	2	2376	11.178	-8.2048
6	2	440	7.6545	0.51918
6	2	34400	6.8469	96.986
6	2	25404	15.973	82.629
6	2	360	11.056	0.63468
6	2	888	9.848	-8.6295
6	2	508	8.3622	8.3297
6	2	900	8.2011	22.239
6	2	912	10.125	23.529
6	2	15192	11.195	29.6
6	2	8712	10.537	119.06
6	2	1808	14.752	77.668
6	2	1096	12.935	-5.2736
6	2	3332	18.462	63.153
6	3	1460	10.053	10.321
6	3	932	11.98	24.407
6	3	564	12.415	-13.971
6	3	704	12.348	-5.843
6	3	1080	11.217	2.4963
6	3	1372	11.87	35.191
6	3	2376	12.638	-12.261
6	3	440	7.1955	5.9183
6	3	34400	10.49	117.33
6	3	25404	19.344	99.04
6	3	360	11.919	12.697
6	3	888	11.488	9.1372
6	3	508	9.9902	17.031
6	3	900	10.248	13.086
6	3	912	11.68	29.615
6	3	15192	12.193	54.737
6	3	8712	13.646	99.675
6	3	1808	20.226	98.332
6	3	1096	17.609	-16.894
6	3	3332	18.784	74.687
6	4	1460	26.162	6.8418
6	4	932	23.601	19.49
6	4	564	21.766	-18.358
6	4	704	23.118	-0.55768
6	4	1080	19.456	2.0343
6	4	1372	20.021	35.252
6	4	2376	24.16	-8.8047
6	4	440	17.207	-13.231
6	4	34400	24.811	78.136
6	4	25404	34.888	37.976
6	4	360	24.739	4.4613
6	4	888	23.427	-14.456
6	4	508	21.488	11.171
6	4	900	20.747	23.43
6	4	912	23.45	16.464
6	4	15192	28.848	36.744
6	4	8712	27.134	77.42
6	4	1808	31.601	74.454
6	4	1096	29.656	-45.391
6	4	3332	36.508	73.454
6	5	1460	9.0623	23.782
6	5	932	8.5665	22.716
6	5	564	8.7074	1.2368
6	5	704	8.9574	-10.128
6	5	1080	8.3074	5.2829
6	5	1372	7.4913	38.817
6	5	2376	7.984	-14.568
6	5	440	4.2818	-1.5708
6	5	34400	9.3963	117.9
6	5	25404	10.248	93.89
6	5	360	7.5917	16.381
6	5	888	6.5315	12.996
6	5	508	5.565	9.3255
6	5	900	5.97	21.798
6	5	912	6.6151	26.481
6	5	15192	9.144	45.241
6	5	8712	7.9291	110.38
6	5	1808	10.834	98.139
6	5	1096	11.136	-5.946
6	5	3332	12.963	76.795
6	6	1460	10.911	11.743
6	6	932	10.405	12.434
6	6	564	10.954	-1.7413
6	6	704	11.358	-9.8689
6	6	1080	10.704	5.4997
6	6	1372	10.549	30.779
6	6	2376	12.499	-10.111
6	6	440	6.8659	-11.931
6	6	34400	10.678	90.329
6	6	25404	17.457	49.584
6	6	360	9.6417	8.0459
6	6	888	8.9437	-6.1354
6	6	508	8.0512	6.8344
6	6	900	7.6889	8.817
6	6	912	9.8257	18.1
6	6	15192	10.909	28.184
6	6	8712	12.685	100.53
6	6	1808	16.061	59.762
6	6	1096	14.97	-11.275
6	6	3332	17.956	59.021
6	7	1460	3.7281	15.005
6	7	932	3.3916	19.659
6	7	564	2.9947	4.3848
6	7	704	3.3224	-14.064
6	7	1080	3.8991	6.1491
6	7	1372	4.2945	33.919
6	7	2376	6.3758	-9.0084
6	7	440	3.0523	2.5526
6	7	34400	3.2174	108.95
6	7	25404	8.0772	91.407
6	7	360	5.2306	6.3787
6	7	888	5.0698	5.5246
6	7	508	4.0118	9.2487
6	7	900	3.8167	22.156
6	7	912	4.2368	22.723
6	7	15192	5.9756	39.524
6	7	8712	5.107	113.82
6	7	1808	7.5271	85.403
6	7	1096	6.1651	-7.7212
6	7	3332	9.3013	70.65
6	8	1460	22.794	12.296
6	8	932	23.685	10.781
6	8	564	24.046	9.3311
6	8	704	22.119	-10.993
6	8	1080	22.768	4.8999
6	8	1372	22.227	38.21
6	8	2376	24.145	-12.255
6	8	440	16.157	-0.76001
6	8	34400	28.868	73.751
6	8	25404	34.456	19.718
6	8	360	20.447	17.935
6	8	888	20.106	-11.574
6	8	508	18.929	4.107
6	8	900	17.974	6.5892
6	8	912	21.167	11.083
6	8	15192	29.592	13.416
6	8	8712	28.388	85.734
6	8	1808	30.976	50.557
6	8	1096	27.487	-22.526
6	8	3332	31.544	48.813
6	9	1460	24.331	23.949
6	9	932	28.414	20.683
6	9	564	29.651	-4.9014
6	9	704	29.352	0.021322
6	9	1080	25.931	5.6779
6	9	1372	22.235	41.492
6	9	2376	19.801	-10.815
6	9	440	13.898	-1.9769
6	9	34400	14.187	125.02
6	9	25404	25.592	79.056
6	9	360	25.544	15.509
6	9	888	30.077	10.666
6	9	508	29.474	15.62
6	9	900	29.329	20.62
6	9	912	30.588	26.675
6	9	15192	20.647	44.919
6	9	8712	22.755	112.95
6	9	1808	29.682	90.452
6	9	1096	33.549	-18.348
6	9	3332	37.772	65.599
6	10	1460	26.948	34.421
6	10	932	27.506	25.733
6	10	564	24.42	-6.2122
6	10	704	25.676	-9.6617
6	10	1080	29.441	0.013575
6	10	1372	31.98	49.148
6	10	2376	38.625	-9.8237
6	10	440	41.195	-0.5818
6	10	34400	35.251	142.42
6	10	25404	34.22	89.763
6	10	360	28.1	22.786
6	10	888	31.757	24.677
6	10	508	30.646	15.196
6	10	900	29.922	20.294
6	10	912	34.458	29.54
6	10	15192	36.392	63.936
6	10	8712	33.992	118.33
6	10	1808	33.507	100.82
6	10	1096	33.036	-42.382
6	10	3332	35.782	65.833
6	11	1460	8.9349	21.64
6	11	932	9.2768	19.251
6	11	564	8.8883	-3.8662
6	11	704	9.0298	-2.1809
6	11	1080	9.5972	6.6184
6	11	1372	9.4628	34.761
6	11	2376	11.152	-14.305
6	11	440	7.4205	-9.0089
6	11	34400	8.9862	116.4
6	11	25404	14.475	73.082
6	11	360	7.8056	10.451
6	11	888	8.3626	3.9852
6	11	508	5.5118	11.351
6	11	900	6.4389	21.169
6	11	912	7.9397	20.587
6	11	15192	12.415	38.088
6	11	8712	11.797	127.6
6	11	1808	11.238	79.766
6	11	1096	10.307	-7.0394
6	11	3332	13.749	59.743
6	12	1460	31.393	31.14
6	12	932	30.914	21.683
6	12	564	29.321	-4.2156
6	12	704	27.73	-1.3221
6	12	1080	29.662	4.0966
6	12	1372	30.612	50.359
6	12	2376	33.308	-10.665
6	12	440	23.275	2.605
6	12	34400	26.742	144.1
6	12	25404	34.742	83.821
6	12	360	26.575	32.893
6	12	888	26.676	20.284
6	12	508	19.51	14.402
6	12	900	22.967	24.082
6	12	912	27.283	30.111
6	12	15192	30.047	57.921
6	12	8712	32.623	103.67
6	12	1808	36.363	98.747
6	12	1096	37.065	-38.252
6	12	3332	39.143	61.774
6	13	1460	21.084	23.736
6	13	932	21.079	22.277
6	13	564	20.869	-5.0492
6	13	704	21.646	-1.8837
6	13	1080	24.744	6.1537
6	13	1372	27.61	39.778
6	13	2376	28.752	-16.799
6	13	440	19.066	-5.3893
6	13	34400	26.395	115.45
6	13	25404	30.563	80.01
6	13	360	15.731	11.703
6	13	888	18.3	5.5072
6	13	508	17.142	9.2873
6	13	900	18.734	16.173
6	13	912	20.958	16.137
6	13	15192	29.931	36.18
6	13	8712	30.148	126.41
6	13	1808	28.073	77.317
6	13	1096	30.259	-9.7055
6	13	3332	31.77	64.137
6	14	1460	7.889	31.279
6	14	932	9.3938	21.434
6	14	564	10.998	1.9669
6	14	704	11.824	-4.7068
6	14	1080	8.8935	-1.0316
6	14	1372	8.9235	50.692
6	14	2376	9.6288	-7.5656
6	14	440	6.7455	2.8254
6	14	34400	6.3893	138.84
6	14	25404	8.8038	75.188
6	14	360	8.175	22.547
6	14	888	8.2444	19.203
6	14	508	7.4429	16.198
6	14	900	7.7856	22.631
6	14	912	7.7039	28.551
6	14	15192	7.1112	55.779
6	14	8712	9.0169	106.21
6	14	1808	13.013	103.38
6	14	1096	12.703	-28.934
6	14	3332	13.027	64.901
6	15	1460	11.884	19.076
6	15	932	13.209	26.847
6	15	564	14.456	-1.9508
6	15	704	14.945	-1.1499
6	15	1080	20.081	7.8142
6	15	1372	20.92	37.355
6	15	2376	19.388	-14.159
6	15	440	12.275	-6.804
6	15	34400	18.939	98.414
6	15	25404	23.06	68.1
6	15	360	9.8083	14.439
6	15	888	10.36	-0.52036
6	15	508	8.8406	7.3416
6	15	900	9.55	22.167
6	15	912	10.482	4.5825
6	15	15192	18.3	29.267
6	15	8712	19.025	93.505
6	15	1808	18.624	63.073
6	15	1096	16.582	-12.247
6	15	3332	19.637	57.216
6	16	1460	13.168	24.272
6	16	932	16.818	20.706
6	16	564	16.887	-3.3751
6	16	704	16.81	-5.877
6	16	1080	17.881	4.4129
6	16	1372	17.911	45.755
6	16	2376	17.231	-8.8803
6	16	440	12.03	-0.88011
6	16	34400	10.071	130.48
6	16	25404	17.047	81.729
6	16	360	12.178	7.7802
6	16	888	15.788	13.749
6	16	508	17.719	18.832
6	16	900	17.753	21.453
6	16	912	16.499	22.179
6	16	15192	11.557	51.468
6	16	8712	13.445	106.79
6	16	1808	18.209	93.626
6	16	1096	21.527	-21.061
6	16	3332	22.255	60.571
