# Supplementary material for: Global sleep homeostasis reflects temporally and spatially integrated local cortical neuronal activity
Source: eLife. 2020 Jul 2;9:e54148. doi: 10.7554/eLife.54148 (PMC7332296; doi:10.7554/eLife.54148)
Supplement: Figure 1—source data 1. [file elife-54148-fig1-data1.zip › Figure 1/Firing Rates/Firing-Rate-Mouse-1.csv]

LFP 1	LFP 2	LFP 3	LFP 4	LFP 5	LFP 6	LFP 7	LFP 8	LFP 9	LFP 10	LFP 11	LFP 12
73.75	57.5	75.25	61.75	50.25	54.5	25	78.25	71.5	59.5	58.25	163.5
74.5	59	81.75	48.25	63.75	67.25	18	69	75	70	57.5	173.5
91.5	62.75	94.5	44	64	64.5	21.25	97.5	97	64.5	68.5	176.5
84	62.5	74.75	48.75	63.75	74.25	42.75	74.5	86.25	61.75	66.25	170.25
94	54.25	115.75	45.75	54	58.5	11.5	89.25	93.25	73.75	65.75	190.5
62.75	86.75	66	18.25	52.75	29.5	14.5	114.25	79	56.5	70.25	152.25
86.5	54.5	61.75	27.5	30.5	28	25.75	99	70	66.5	72.75	164.75
79.75	51.5	48.5	12.25	30.25	21	14	96.25	62.75	47	61.5	150.5
80.75	54	56.5	18	32	26.75	17.25	84.5	63	66.25	70.25	151.5
84.75	55.5	62	19.5	40.75	23.25	23.25	84.5	64.25	63.75	61.75	161.75
76.25	43.75	65.5	19.5	38.5	21	25.75	86	66.5	57.5	62	161
62.75	44.5	56	13.25	30.75	26.25	13.75	80.5	54.5	51.25	53.75	136.75
72	48.25	60	19	34.5	20.5	24.75	80	56	63.25	62.75	152.25
66.5	61.25	46.75	13.75	32.75	19.5	10.5	87.75	58.75	47.25	64	158.25
63.25	43.5	65.5	19	31.75	29.75	15.75	75.5	60.5	60.75	58	149
64.75	45.25	62.5	14.5	30.5	28.25	19.75	73	60.75	56.25	62.5	146
76.75	50.25	60.25	27	41.5	26	20.75	75.5	66.5	54.5	57.25	159.75
106.75	55.25	89.75	60.75	66.75	44	39	79.5	97.75	72.5	65.25	182
89.5	66.5	95.75	73.25	67.25	55	29.75	86	104	80	79	167.25
88.5	68.5	77.5	82.5	68.25	69.75	29	87.5	92.75	81	82.75	152.25
97.5	72.75	77.25	71.75	48.75	59.25	31.5	92.75	84	70.25	86.75	173.75
74.5	63.75	79.25	58.5	68	70.25	27.5	81.5	79.25	58.75	72.25	159.5
77.75	77.25	62.25	51.75	57	52.5	28.25	92.5	76.25	65.25	99.25	164
91	74.25	66.75	64.25	56.5	64.5	27	85.75	89	64.5	59.5	163
79.5	70.25	70.75	54	62.75	70.75	30.5	87.25	85.75	63.75	67.5	163.25
89.75	68	72.5	52	62	68.75	24.5	78.75	70.75	61.25	74	154.25
84	98.75	96.25	81.75	92.25	68	41.75	79.5	83.25	74.75	87.75	154.25
66	63.5	92.75	69.75	76.5	54.75	34	82	87.5	77.5	78.5	167.5
87.75	70.25	68.75	67	72	68	33.75	80.5	83.75	66.75	76.25	143.5
69.5	76.75	98	70.5	63	63.75	22	85	90.5	77.5	68.5	152.5
77	64.75	104	45.25	77.75	57.5	13	83.25	83.25	68.25	70	151.75
83.75	71.25	70	44.75	71.5	58	20.5	72.25	97	72.25	68.75	174.75
77.25	59	58.75	56.25	95	76.5	28.25	79.75	82.25	74.25	63.75	171.5
93.75	50.25	55.75	71.75	62.5	66	41.25	67	81	64.75	65.5	170
89.25	66.5	80.5	64.5	73.5	61.5	24.5	82.5	92	63	76	178
90.25	72.75	87.25	67.25	84.25	67	40	66.5	103.25	64	64.5	148.25
79.25	66.75	70	61.75	77.5	63.5	20	81.25	88	64	89.5	150.25
93.5	47	79.25	46.75	64.5	55.5	17	96.5	84.75	68.5	116.75	172.25
96.5	51.75	60.75	45.5	54.25	46.75	23.5	114.25	89	69.5	98.25	191.75
88.5	51	64.5	41.5	52.75	38.25	16.25	105.25	94.75	82.25	86.25	188.5
89.25	85.5	81.75	47	66	64	30.25	74	87.25	60	80.75	173.25
91.25	67.75	71.5	42.5	68.5	49.25	29.25	100	90	73	96	170.25
111	59.75	69.75	42.5	60.75	49	22.5	112	100.75	87	93	190.75
69.5	50.5	73.5	50.5	73.5	54	33	92.75	78.5	69.25	98.25	182.25
100	43.5	74.75	32.25	56.75	40	19	105	80	74.25	97.5	188.75
92.5	45.75	62.75	51.25	68.5	40.25	25.25	115	79	71.5	96.75	174.75
92.75	55.25	69	29.25	64.25	40.25	24	96	72.25	63.75	94.5	172.75
76.75	68.25	69.5	55.75	70.75	64.25	30	81.75	73.5	69.25	73.25	172.5
80	63.25	65.5	49	70.75	48.5	22.25	96	78.75	67.25	97.5	165.75
87	70.75	64.75	44.25	82.5	47.25	24.25	92.5	79	70.75	92	162.25
90.75	53.75	64.25	28	76.25	37.75	22.25	107.75	81	72.5	82.75	179.75
94.25	58.5	65.75	41	71.75	47	32.75	105	80.75	78	94.5	185.5
88.25	70.5	69	41.75	70.75	59	34	96	88	85.5	72.75	183.25
80	91.75	91	47	72.75	66.25	36.75	92.5	90.5	73.5	85	169.5
100.25	82	84.25	56.5	86.75	81.75	49.75	114.25	90.25	81.75	91	183.75
82.75	86.5	69	69	56.25	71.5	41.75	79	91.25	63.25	65	171
88.25	64.75	80.25	45	81	70.5	33.25	89.75	84	74.5	94.25	171.75
80.75	69.5	87	44.25	79	71	36.25	93	75.75	70	100.5	171.75
71.75	72.25	72.5	57.75	45	69	53	73.25	86.5	62.75	82.5	144.5
91	57.25	76.25	85.75	50.5	59.25	66.75	99.5	101.5	79.75	90.5	150.75
102.25	74.75	81	72	58.25	72.5	45.25	116.25	111.5	84	111.75	178
88.5	60	75.5	79.75	53.75	62.5	30.25	101.5	105.5	71.25	79.25	150
93.25	74	63.5	53.75	41	41.5	16.25	107.75	95.25	70.75	82.5	155.75
88	61	77	74	40.25	80.75	35.25	83.25	82.75	63	62	164.75
98.5	65	71.75	65.75	66	93.25	41	76	89.25	68.25	66	156.5
122.25	76.25	69.75	71.75	70	79.5	45.75	118	112.25	79.25	80.75	199.25
62.25	77	45.5	29.75	34.5	38.5	14.5	106.75	87.5	65	78.25	145
65.75	53	41.5	26.5	36.75	38	11	96.5	60.5	55.25	69.75	151
64	53	44.25	17.5	34	38	8.25	96.25	67.5	60.25	64.5	142.75
59.25	46.5	44.25	28.25	42.75	27.25	8.25	80.25	56.5	51.75	55.5	146
66.5	44.5	46.25	19	47.5	27.75	8.75	63.75	67.5	61.5	70.75	171.75
59	37.5	39.5	15.25	43	33.75	9.75	67.25	69.25	57	58.5	164.25
81	56.25	50.25	51.75	51.75	57	35	90	89.25	71.5	76	165.5
91	63.75	73.75	94.5	53.5	63.25	57.75	105.75	116	92.75	98.25	162.5
91.5	64.75	56	61.25	42.75	53.25	48	125.5	122.5	113	126	191.25
92.5	56.25	74	50.25	39	72.5	20.75	130.75	115	109.75	119	194.75
85.75	77.5	55.75	25.5	38.5	47	17	109.25	100.5	91	90.25	178.75
100	71	68.5	36	31.75	55.25	13.25	126.5	126.25	97.25	89.75	202.5
81.5	69.75	54	30.25	44.5	58	24.5	111.25	97.5	81.75	88.25	187.25
92.5	81.75	56.5	36.5	47.75	82.25	24.25	119.25	108.75	90.5	103.25	197.25
91	71	49.25	31.75	37.75	71.75	17.5	113	96.75	89.5	91	188
91.75	60.5	68.25	31.75	50.5	68.25	21.25	117.5	96.5	85.25	105	188.75
95.25	69.75	61.25	41.25	40.75	65	16.5	124.25	120	89.75	102.25	203
77.25	67.5	51.25	23.75	39.5	52.75	13.75	101	84.25	71.75	73.75	167.5
96	61.25	74.75	55.5	42.25	78.25	30.5	121	102.25	93.5	119.5	216.75
99.5	64.75	55	40.5	37.5	65	21.25	111	100.5	90.5	120	195.25
87.75	88.75	50.5	25	39.5	59.5	11.5	119.5	107.25	83.75	88.75	175.75
77.5	65.25	52	24.25	42.5	48.75	10.5	125.25	100.25	71.75	86	164.5
92.25	66.75	57.5	35.5	35.75	69.5	16.75	125	108.25	91.5	104.25	194
100.25	77	55.75	37.5	49.25	66.75	23	106.25	98.5	86.25	100	180
79.75	66.5	54	43.75	40.25	55.25	16.75	121.75	86.5	86.25	96.5	188
94	76.75	67	46.25	46	61	24	105.25	97.75	83	100	186
99.25	77.5	70	40.5	36.5	42.5	25.25	111.25	105.75	96.25	102	174.75
65	62	54	34.25	25.25	42.75	27.25	117.75	89.25	72.5	88.75	159
74.25	79.25	50.5	24.5	40	42.25	18.25	104.25	78	84.25	78.5	167.25
77.25	68	57.5	43	35	41	30.75	119.25	100.25	84.5	86.5	175.75
61.75	53.75	52.5	37	32	27.5	16	110.5	65.75	57.5	62.25	135.75
61	45.5	48.75	38.25	36	30.25	18	95.75	80	65.5	64.25	154.25
91	64.75	69.75	59.5	31.5	45.75	28.25	108.75	100.25	87.25	98.25	183.25
104.5	67.5	60.5	50.5	43.5	59	21	106.25	99.5	79	102.5	192.75
88.25	65.25	57.5	44.75	34.75	43	22.5	111	94.5	86.75	129	176.75
86.25	57.25	54	42.5	38.5	47.25	17.75	102.25	88.5	82.75	108	173.5
90.75	66.25	53.25	38.5	39.5	45.5	18.75	100.5	90.25	84	87.75	177
96.25	64.75	54.5	38.75	48	41.25	22.25	102	92	71.5	83.5	172.5
86.5	53.25	56.75	45.75	32.25	40.75	21	113	95.75	85	96.75	182
90	48.75	52.25	44	27.5	47	27	105.25	85	79	99.5	164
97.75	69	52	44.25	40.75	47	18.75	99.5	81.75	78.75	90.5	166
109.75	74	66.25	40	40	63	26.25	114.5	105.5	92.25	97	188.75
89	52.5	65.25	30.5	33.5	46.75	17.25	101.25	95.75	92.25	97	177.25
95.25	78.5	54	43.75	37.25	58.25	16.25	110.5	88	86.25	111	188.75
104.25	64.25	61.25	60.25	35.25	70	21.75	113.25	101.25	84.25	96.25	175.5
66.25	64	44.5	29	38.25	43.75	12.5	112.5	98	75.25	100.75	168.25
78	85.25	46	25.75	53.75	39.5	18.75	110.5	79.5	75.25	82	161.75
84.25	66.75	48.5	27.75	52.25	40.5	12.5	108.75	78	61.75	72.25	152
90.25	74.5	56	52.5	55	39	23.75	109.25	111	83.5	115.25	182.5
101	66.75	52.25	55.75	55.75	59	19.25	112.25	101.25	75.5	104.5	182.5
97.25	69.25	57.25	52.5	39	53.75	25.25	109.25	105	84.25	106.75	181.5
93.25	66.75	64.5	58	50.25	63	20	100	97.75	67.5	90.25	172.75
80.75	75.75	55.5	36.5	48.25	50.25	31.5	108	111.75	97.75	103.75	193.5
86.5	75.75	61.25	40.5	41.25	39.5	13.25	123.5	109.25	79.5	113	173.75
81.25	63.75	48.25	38	48.5	33.5	9.25	118.5	108	66.75	79.25	164
96.5	97.5	55.25	46.75	69.75	51.5	13.5	82	93.5	55.5	76.5	151.25
99.75	77.75	53	61.25	62	65	19.75	78	100	57.25	82.25	161
92.75	62.5	59.75	62.5	65.5	57	41.25	107.5	120.5	82.5	104	165
94.75	63.5	73.75	38.75	37.25	39.25	22.75	120.5	100.75	103.5	113	197.25
88	62.75	59.75	49.25	41.75	39.75	23	121.25	98	86.5	113	179
60.75	61.75	45.25	34.75	45.25	34.75	15.5	112.25	84.5	78.25	89.25	164.75
81	63.75	58.5	48	46.75	42	30.75	120.5	98.25	90.25	107	184.5
55.5	66.75	51.5	31.25	48	29.5	13.75	102	76.25	65.75	76.25	159
62.75	48.25	60.25	29	53	37	16.5	101.25	78	67.75	67.25	152.5
84.5	66.25	65	46.5	46.5	39	36.25	103.75	102.25	90.5	108.75	195.25
98	69.75	66.25	52.75	42.5	33.75	22.75	110	103	75.5	95.75	178.75
100.5	65.75	66.5	44.5	40.25	37.5	27	108	104.75	84.5	97	185.75
85	66	71	51	42	32.5	21.5	119.75	100.75	80.5	114.75	186.75
82	53.75	57.5	35.75	42.75	23.5	25.25	101.75	91.25	72.25	101.75	166
82.75	72	55.75	42.5	52.75	31.75	20.75	113.5	93.75	75	85.5	173.5
58.25	73.75	43.5	32	39.25	25.25	23.25	103	90.75	65.5	86	160.25
64.5	73.5	61.5	49	41	27.5	27	108.75	97.75	62.25	77.75	167.5
66.75	51.75	61.75	51.75	30	24.25	29.75	112	92.5	67.5	88	151.75
83.75	67.75	56.25	49.75	44.75	45.25	30.75	124	90.25	86.25	102	195.25
53.75	46.75	51.75	42.5	30.25	25.25	19.5	101.25	78.25	57.5	58.75	140.25
87.5	64	68.5	59.5	48	43.5	35.25	125.5	103.25	91.5	104.25	200.25
100.5	68	68	55.25	40.25	36.75	41	126.5	117	105.5	113.75	203.25
65.5	65.75	61	39.75	36.5	35.5	26	118	100.5	80	84	159.25
77.25	68.5	71.5	39.5	41.25	33	32	119.75	109	92.5	126	193.75
68	49.5	65.25	50.25	32.25	30	31.25	121.5	92.25	86.75	104.75	186.5
80	71	58	44.75	38.75	27.5	24.5	127	103.75	83.75	106.75	194
85.5	57.75	55	33.5	36.25	23.5	19	113.25	93	85.75	112.5	186
77.5	58.75	57	33.25	35.25	27.25	17.5	112	88.75	69.75	91	169.75
84.75	69.25	49.25	35.25	42.25	35.75	26.25	114.25	97	89	96.75	186.25
90	89.5	51.5	50.75	56.5	35	21.75	82.75	83.25	69	80.75	167
104	69	69.5	64	49.75	53.5	17.75	126.5	110.5	88.25	97.25	186.5
100.25	73.5	70.5	55.25	40.25	36.5	24.25	115	113	79.75	97	195.5
87.25	93.75	49	45	60.25	68.5	15	78.75	84.5	52.5	83	147.5
84	86.5	65.25	56.75	67.5	71	25.75	82.75	93	58.5	80	156.25
96.25	91	79	76.5	60.5	79.75	43	81.75	95.25	76.25	83.75	155.25
84.25	74.75	71.5	56.75	56.25	56.25	18.75	77.75	76.75	60.25	67	143.75
86.75	78.75	66.5	54	70.25	81.25	35.75	86.25	94.25	74	76.5	166.75
79.75	69.75	76	60.5	68.25	83.25	39.75	92	108.25	81.75	90.75	171.75
96.75	68.25	74.5	77.25	65	81	66.25	93.75	108.75	83.75	90.25	170.25
83.75	50	79.5	53.75	60.25	56	33.25	81.5	80.5	62	73	167.75
80.25	74.75	70	46.25	78.75	65	21.5	66.25	74	66	68.5	157
73	68	63.5	25.75	76	35	11.25	68.25	67.75	60.75	56.75	154
61.75	55	53.75	24.75	64.5	23.5	3.5	58.75	69	53.75	44.5	144.75
93.25	67.25	66.5	42.5	73.5	40.25	13.25	69	88.25	65	56	161.75
89	61.25	83	60	67.5	55	33.5	71.75	85.75	74	72	163.25
80.25	64.75	72.25	47.25	50.25	50	21.5	71.25	78.25	64.25	65.5	152
75.5	70	78.5	59.75	62.25	63.75	44.25	75.5	92	75.25	78.75	167
81	91.75	57.75	71.5	62.75	59	37.25	89.25	93.25	94	87.75	183.5
67.25	66.5	77.75	51	70.25	63	42.25	91	93	83.75	86.25	206.5
75.75	57	84.75	51.75	82.25	70.75	32.5	93.75	98	85.25	69.5	195.25
81.75	57.75	88	78	51	46.5	46.25	90.5	104.25	81	101.75	183.75
92.25	57.5	67.5	53	41.5	30	37.5	82.5	83.75	80	95.75	178.75
94.5	54	65.75	32.5	45.25	38.25	21.75	87	84.25	79.5	92.5	175.5
79.25	51.5	64.5	25.75	50.25	36	16	73.5	79.25	65.5	83.75	169.75
83.75	63	52.5	35.75	48.25	40	15.25	76	83.75	70	79	167.75
75.25	26.25	43.25	16.5	33.25	25.75	3.75	56.75	69	50.25	61.25	129
87.25	45	60.25	34.5	45.5	51	30.5	92.5	94.25	90.75	100.5	190.25
75.75	41.25	38	16.25	40	24.5	5.5	57.5	62.5	54	65.5	128.75
77.5	30.5	43.5	14.5	49	30.75	10	63.5	68.5	64	68.75	138.5
78.75	32.25	38	12.5	55	31.5	4.5	53.25	63.75	46.5	59.5	127.5
81	44.75	37.25	28	37.25	47	10	62	78.5	59.25	88.25	148.5
91	49.5	48.25	39.25	40.75	40.75	17	99.25	84.75	79.25	85.5	172
67.5	31.25	31.25	27.25	21.25	26.5	8.5	73.75	69.25	55.25	73.25	138
81	42.5	37.75	33.25	45.25	37.75	13	72	70.25	64	87.5	151.75
67.25	30.25	41.75	19	37	32.75	5.25	59.75	62.25	60	70.75	131.5
79.25	38.75	35.75	24.25	39.75	30.5	8	67	60.5	67	82.5	149.5
80	38.25	43.75	25	35.75	33.75	9.5	53.75	59.5	60.75	76.25	148.75
71.75	34.25	42.75	28.25	41.5	25	4	53.25	57.75	48.25	60.25	135
75	36.5	40.75	23	35.75	30.25	7	60.25	60.25	52.75	71.25	143.75
74	42.75	43.25	23	39.5	34.5	7.5	60.25	69.5	56.5	71.5	149.5
86	39.5	45.5	28.75	46.25	31	10.5	52.25	65.5	71.75	73.25	158.25
58.5	32.75	33.75	18.5	34.25	30.5	4.5	57.25	59.75	57.75	72.75	134.75
66.25	37.75	37.5	21.5	41.5	34.25	7.5	51.75	63.75	60.25	85	140.25
53.25	42	38	17	36	27.25	3.5	51.5	58	46.25	57.25	134.5
63.75	40.75	41.5	17	37.25	25.75	5.25	45.75	57	50.75	58.25	134.5
55	37.5	43.5	22.25	37.75	26.5	4.25	45.75	60.75	39.25	51.25	132.75
46.5	36.5	34.5	12	32.25	20.5	7	39.75	52.5	48.5	60	129.75
70.5	35	37.5	20	36.5	32	4.5	53	63	50.75	68	132.25
46	29.75	39	15.5	31.25	22.75	5.5	46	48.5	41.5	57.75	124.75
73.75	40.75	49.25	25.5	32.25	43	9.5	69.75	71	64.25	99.75	147.5
59.75	29.5	44.25	19.75	35	33.5	6.25	62	55	56.25	66	144
70.75	48.5	44	25.5	41.75	34.25	7.5	63.25	60.5	56	69	152.75
65	39.25	41.5	27.75	37.25	26	6.75	68	55.75	58.75	75	147.5
73.25	37.25	50.75	40.25	39	46.5	23.25	77.75	81.25	76	94.5	159.75
74.5	47.25	46.25	40.75	47.75	45.75	23.5	78.75	83.25	73.5	94.75	160.75
80	70	71.75	50.25	67	58.75	46.75	105	87	70.75	81.75	174.75
83.5	78.5	67.25	46.5	52.25	39	25.25	74.75	77.5	57.25	71	159.25
101.5	76.75	77.75	69.5	51.5	59	42.25	94.5	98.5	74	76.25	177.75
94	76	71.5	43	55.25	37.75	24	69	76	70.5	74.5	171.5
73.25	68.5	50.25	42.5	56	37.75	17.25	67.25	65	58	62.25	148.75
79.25	61.25	63	52.5	56.75	39.5	22.25	71	76.25	64	56.75	163.25
66	54.75	65.5	41.5	55.25	31.75	17.5	58.25	67.25	52.75	49.5	150
86.25	69.75	69	50.75	57.75	45.5	33.5	74.5	85.5	65.25	69	155.25
89.5	72.25	81.75	46.75	51.5	49.5	30	67.25	80.75	58	68	155
84.5	56	63.25	48.5	34	52.75	24.75	56.25	77.75	49	58	149
78.25	113.25	56.5	54.5	56	56.5	51.5	108.75	107	72.75	91.75	175.25
74	101.75	45.5	25	41.25	22.75	10.75	117.5	73.25	73.5	69.25	168
76.25	59.75	66.25	33.5	48	29.75	22.75	108	66.5	77	91	172.25
72	64.75	49.25	32.5	40.75	24.5	17	96.75	62.75	58.25	78.25	164.5
80.75	63.75	55.5	33.5	46.25	30.25	21.5	78	71.5	66.5	68.75	181.5
79.75	66	64.75	33.75	44	26.25	30.5	81.5	76.75	79.5	84.75	185.25
99	72.25	66	45.75	58	36	41.25	79.5	81.5	81.75	97.25	186
96.5	86.5	78.25	59.25	70.25	59.75	60.5	90.5	93.25	98	102.5	188.25
66	68.5	59.5	27.5	40	27.5	16.75	62.75	76.75	61.75	71.5	140.75
83.75	63.5	66	50	63.25	56.5	42.25	72.25	85	74.5	77.75	160.25
58	66.5	61.5	35.75	47	44.25	23.75	67.25	77.75	58	65.25	150.5
85.75	82.75	70.5	51.75	59.75	60.5	30	80.25	80.25	64.5	79.25	163.75
97.75	96.5	53.75	26.5	57.5	52.25	25.75	109	87.5	72.25	68.75	175.5
86.5	85.75	40.5	18	48.5	30.25	11.25	101	69.75	65.25	53.25	160.5
67.75	77.5	55	23	61	34.75	18.75	77.5	64	45.25	56.5	162.5
71	61.75	56.25	40	55.25	45	35.5	78.5	86.75	61.75	70.5	151
86	87.75	75.5	73	53.75	74	41	86.75	97.25	71.5	76.5	167
77.25	78	65.5	53.5	66.25	58.5	26.5	71.5	83.25	64.75	69.25	151.5
87.5	82.5	78.75	78.75	50	75.75	47.75	87.25	96.5	74.5	80.25	163.5
97	100.75	98	69.75	59	76.25	43.75	98	120	73	83.5	165
119.25	107.75	78	77.75	79.25	78.25	42	89.5	99.25	65	76.5	173.75
54.75	38.5	53	35.25	44.5	40.5	12.75	62.75	84.25	47.25	52.75	142
91.25	72.5	91.5	62.5	61.75	86.5	48.5	75.25	100.75	79	65.5	189.25
91.25	96.5	76.75	69.75	54.75	59.75	43.25	106	111.25	79.25	94.5	173.75
67.25	109.75	44.75	36	40.5	23.5	15	110.5	71	68.5	77.5	179.25
96.5	80.25	69.25	49.25	56.5	31.5	35.25	114.5	96.75	98.5	79.75	184.5
79.75	75.5	47	29.75	45.75	29.25	20	96	81.25	59.5	69.5	174
88.25	77.25	64.25	31.5	49.5	31	22.75	93	83	71.75	63.5	175.5
79.75	76.75	54	31.25	51.75	32	18.75	99.5	80.25	71.25	75	182
69.75	66.25	52.25	28.25	43.5	32	18.25	86.75	80	59.75	68.25	160.25
67.25	50.75	60.75	37.75	49	23.75	20.25	77.5	76.5	62.75	67.75	182.25
65	60.25	56.75	33	49	28.75	25.75	72.75	85.75	77	74	181
112.75	90	93.25	77.75	66.25	79.75	57	92.5	125	92	91.25	193.25
92.5	64.25	65.5	65.25	61.5	58.5	36.25	79.5	86.25	64.75	72.75	161.5
104.75	78.25	72.5	73.25	61	89	43.25	90	106.25	85.25	78.75	180.75
105.5	62	63.75	59.5	66.25	69.25	35.5	87.25	97	66.75	69	157.25
70.5	58.75	62	38.25	55.5	57.75	19	67.5	77.75	56.5	68	144.75
100.25	92	79.25	72.75	62.25	78	38.75	93.5	107.75	77.25	80.75	172.25
67.5	92.5	54.5	32.25	28.5	41.5	22.25	121	86.75	76.75	95	173
110	55	75.25	34	42.25	34	32.5	107.5	85	89	83.5	182
89.5	67.75	55.25	29	44.25	43	26.5	124.5	80.5	78.5	86.5	198.25
98.5	63.75	75	30.5	45.75	35.5	29.5	101.5	90.75	82.75	90.5	183.25
97	53.25	69.5	34.75	44.75	30.75	34.25	91.75	89	83.75	77	188
127.25	72.75	107.25	74.5	57	73.5	66.75	97.5	119.25	110.75	107.75	197
110.5	84.25	103.25	99.75	64.75	62.75	80	103	117.75	100.5	108.75	189.5
98.25	73.25	65.75	80.25	55	72	37.5	91.75	108.25	85.25	89.25	175.25
97.75	80.5	60.5	61.25	59	68.75	33	81.25	87.25	64.75	72	171
98.25	78.5	71.25	55.5	58	68.75	38.25	85.75	90.5	77.75	86.25	171.25
98.25	60.25	76.25	76.25	62.75	57.5	83.25	101.5	108.75	80	103.75	168.5
104.5	72.75	66	70	50.5	66.75	47.75	85.25	96	76	99	160.5
97.75	58.25	83.75	58.75	62.25	53	39	86.75	101	72	98.5	158.5
101.25	56	76.75	58	64.5	55	29.5	99	118.25	85.5	86	172.75
104.5	92.5	86.25	57	89.75	56.75	39.25	92	94	81.5	94.5	173
93	90.5	84	48.5	78	52	14.75	71.75	87.25	67	68	161.5
90.25	79	67.5	39.75	84.5	58.75	29	78.5	85	64.75	65.75	176.25
84	73	57	24.5	79.5	41.5	14	70.25	76.5	63.25	69.75	150.25
89.5	83.75	58.75	36.75	80.75	51.25	20.25	110.25	101.25	77.5	73.75	181
79.25	94.75	57.75	27.25	79.75	36.75	10.25	97.75	79.5	64.5	55.5	167.75
94	93.25	50.5	19.25	63.5	29.5	13	101.75	78.25	57.25	53.5	164.25
82.25	70.25	57.25	24.25	65.5	33.5	11.25	77.25	69.75	50.25	53.75	158.5
51	42.5	40.75	16	54.75	22.5	4.5	54	60.5	40	54.5	137.25
99	79.25	64.75	47	86.25	67.75	31.25	84	92.75	68.25	64.5	167.25
79.75	67.75	64.25	32.5	69	43.5	23	74.25	77.25	50.75	73.5	156.75
68.5	75.5	52	29	74	30	7.75	62	72.5	57.25	62.75	145
85.25	69.75	58.75	43	84.5	59.25	17.25	71.5	86.5	54.25	63.75	152.5
87	90.75	82.75	46	79.75	57	38	88	85.5	65.75	71.25	168
105	66.25	93.5	64	58.5	62.75	55.75	92.5	101.75	77	83	179
95	76.75	73.75	60.5	42.5	49.75	30	105	95.5	89.5	90	172.75
85.25	78.75	58.75	39.25	68	78.5	28	80	76.5	68.25	70.75	167
96.25	84.5	78.25	56.5	52.75	69.5	36.25	84.75	92	66.5	78.75	154.25
88.5	77.5	68.75	72.5	62.75	66.25	42.75	79.5	92	80	73.25	159
87.5	79.5	69	77	70.25	94	57.75	100	110.5	80.75	86	184.5
87.25	85.25	60.25	47	62	65.25	34.25	72	82.5	69.5	74	150.5
87.25	75.75	70.5	74.25	59.5	75.5	37.75	83.75	93	69.25	84.75	161.75
86.25	88	75.75	63.75	63.75	67	51.75	86.5	92	63	70.75	159
85	98.25	84.75	70.25	78.25	74.75	39.25	96.75	104	79	76.5	173.25
94.25	77.75	78.25	85.75	66.5	66.5	39.75	98.5	108.25	87.25	78.5	174.75
71	59	67.75	17.75	29.5	25	4.5	107.75	84	72	78.75	157.75
95.25	101.75	85	76	73.75	93.5	60	104.75	105.75	76.25	93.25	192.75
90.75	76	75.5	60.5	59	80.25	47.75	81.75	97.25	68.75	72	161.75
98.25	87.25	95	58.5	60.75	81.5	59.75	79.25	107.75	69.5	71.75	170.25
83.75	73.75	73.75	56.5	57.25	67	36	93.25	102.75	68.5	66.75	163.75
79	73	85	62.75	66	64.5	28.25	100.75	102.5	83.75	83	180.25
87.75	68	87.5	66.25	74.5	59	19.25	102.5	89.5	84.25	82	186
88.5	52	85.5	56.75	55	38.25	13.5	149	123.25	90	80	200.75
98.25	49.5	96.25	41.25	91	47	11.5	131.25	115.25	87.5	83.75	206.25
68	65.75	49.5	34.75	69.25	44	14	89.5	98.75	59.25	62.5	163.75
86.5	56.25	56.5	44.75	55.75	57	18.25	80	69.75	57	62.75	156.75
93.25	40	59.25	32.25	55.25	47.75	13.5	69	84.75	55.25	64.25	155
103.75	65.25	85.5	59	83.75	62.75	26.25	97.25	105.5	87.25	89	184.5
113.5	58.75	86.5	65.5	88.5	83.25	33.25	110.75	110.25	83.5	90.5	195.25
104.75	80.25	74.25	54.5	83.75	70.5	22.25	114.25	98.75	75.75	90.25	195.5
60.5	42.5	54.75	29	70.25	45.25	13.25	83.5	91.25	54.25	60.25	143.5
70	30.25	50.25	29	63.25	39.75	8.75	58.25	75	50.75	57.5	136
115.25	87	89	75.75	89.5	83.75	36	133.25	113	93	90.5	218.5
109.5	74	93	60	102.25	61.75	31	112	101.5	84.75	87.25	197.75
95.75	80.25	94.5	51.75	95.5	63.5	28.75	107	100.5	89	76.75	194.5
102.75	88	86	63.75	95.75	78.25	30.75	97	110.25	88	86.75	173.75
88.75	71.25	81.5	92.25	74	70.25	30.25	104.5	102	76.25	102.25	186.75
79.75	62	101.75	58.75	46.75	46.5	28.75	111.75	98	76.75	111.75	183.5
83.75	60.5	86.25	64.75	65.25	54.5	31	109.25	101.25	77.25	105	171
93	61.75	81.75	53.25	73.5	50.75	36	110.25	94	77	105	173
87.5	58.25	75.5	43.25	88.25	46.25	22.25	120.25	95.25	75.75	96	188
96.75	47.75	67.75	53.5	74.5	53.75	37.75	110.25	97.25	79.25	98.75	197
102.75	53.25	72	42	76	59.25	23.25	105.75	101	78	82	181.5
98.75	81.25	73.75	71.5	81.25	57.5	17.25	103	102.5	80.5	82	187.25
108.25	59.25	93.5	71.25	68.25	65	19	111.75	99.75	79	81.75	199.5
98.5	68.25	67	61.75	82.5	69.5	19.25	109	116	87.25	71.5	194.5
88.75	70.75	81	64.25	84.5	69.5	19.75	89.25	100	75.75	65	185
99.5	65	87.25	53.5	85.75	67.75	22.5	102.75	96	83.25	62.25	173.75
111.25	68.75	91.25	70.75	93.5	75	28.25	86.5	106.25	78.75	72	173.25
87.5	70	83.25	75	83	71.5	24.5	88.75	98.5	81.5	77.5	166.5
87	76.25	89.25	61.5	86.25	67.5	26	100.25	102.5	80	83.5	176.5
94	68	76.25	67.5	76.5	68.25	27.5	100	110	79.25	79.25	173.25
107.75	67.75	69	69.5	85.75	68.25	37	95.75	100.25	78.75	86.75	177.25
80.25	71.75	72.25	61.75	89.75	87.75	35.5	90.5	95	71.75	75	156
94	70.5	77.5	63.25	74.75	65.75	35.25	93.75	101.75	78.25	92.25	170.25
97	83.75	92.5	68	82	59	41.5	109.25	105.25	82.25	89.5	173.25
87	72.5	103.5	69.5	56.75	49.75	33.75	114.5	110.25	83	102.75	177
77.5	69.25	98.75	58.5	76.75	52.25	17	104	94.75	72.75	104.75	174.5
80.5	60.75	84.25	49.75	61.25	51.25	23	97	95.25	83.5	90.25	178.25
92	50.25	81	43.5	66.25	46	27	117.75	102	88	104.5	176.75
106	67.5	77.75	52	74.5	50	29.25	111	104	79	100.5	181.75
121	67	69	43.25	69.75	43.25	32.5	125.75	100	85.75	114.75	195.5
89.25	67.25	79.75	45.75	79	49.5	22.25	111	96.5	83.75	101.25	179.5
116	52.25	62.75	32	70.25	53	22.75	122.5	102	89.25	90.5	198.5
97	51	55.25	44.5	70.25	49.75	41.25	109.5	91.75	85	92.25	186
107.5	69.75	66.5	46.75	70.25	53.5	25.5	116.75	97.5	82.75	70.25	196.5
89.75	90.25	81	62.5	92.25	57.75	21.25	101.5	94	75.25	88.5	176.5
76	70.75	57.25	62.75	74.25	73	16.5	81.75	105.25	59.25	82.5	162.25
96	91	76.75	61.25	80.75	70.75	22.75	137	118	86.25	91.25	198
90.5	86.25	79.75	73.25	83	70.5	27.25	106.25	102.5	80.25	71.5	177.25
78.5	73.75	69.25	71.5	88.25	69.25	32.5	93.75	104.5	72.5	80.75	171.5
91	69.25	60	74.75	74	68.25	27	93.25	99.5	68	67.5	180
80.75	47.25	52	53.5	70.75	46.5	17	101.75	115.75	68.75	74.25	165.25
100.75	69.75	72	88.75	89.25	69	27.5	92.5	104.5	80.5	64.25	184
87.75	57.5	62	77.75	74.5	48.5	33	89.75	93.25	72	66.5	172.75
96.25	62.5	74	80	75.5	59.75	19.5	108	105.25	85.5	84	196
87.75	59.75	65.5	54.25	56	53.5	19	101.5	103	76	73.75	175.75
73.25	59.75	81.5	56.25	56.75	46.25	24	105.75	101.25	81	96.25	183.5
91.75	63.5	71.75	58.25	80.75	51.5	32.5	101.5	93.5	87.75	96.25	188.25
94.5	75	89	38.5	64.25	41.75	38.75	112	95.25	80.25	103.5	188.25
101.25	62.5	70.25	36	63	45	28.5	119.75	104	79.5	100	194.75
90	68.25	79.75	51	76.5	60.5	32	109.25	90.25	82.75	101.5	194
79	72	72.25	42.75	67.25	48	30	108.5	80	74.5	86	183.5
96.25	59.25	79.5	29	62	52	18.25	102.5	90.25	78.5	95.5	187.25
104.5	62	80.5	40.5	71.5	55.5	24	113.5	95	77.25	80	197.75
81.25	60	87.25	47	72	54.5	24.75	102.5	95.5	75.75	99	192.5
78.5	63	83	49.25	88.5	52.25	26.5	101	98.25	69.75	88	181.75
101.75	55	71.25	28	61.75	40.75	15.5	111.75	89.5	73.75	92.75	191.5
98.25	68.25	75	46.25	69.25	59.5	25.5	112.25	91	76	83.5	195.5
89.75	78	87.5	57.25	99.5	64.5	34.5	87.25	110.5	72.25	86.5	164.25
76.75	100.75	111.75	93.5	91.25	59.5	43.75	109	97.75	85.25	102	186.75
84	66.5	79.5	68.5	67.25	51	27.75	107.75	92.75	78	114	174.5
95.5	57.25	76.75	67.5	73	57.75	30.5	112	103.5	78.25	116.5	189
84	60.5	78.75	52.25	83.75	47	31.75	108	99.25	83	99.75	185.75
92.75	55.75	76.5	44.25	87	48	26.25	107.5	102.5	71.25	103.5	180.25
87.25	67.75	66.75	39.5	82.25	44.25	20.5	100.25	84.25	78.25	95.25	169.5
96	66.5	73.5	47.5	84.25	41.25	26.75	93.25	89	75.5	97	176.5
101.75	47	78.5	54	87.25	51	26	120	93.25	81.25	103	189.25
105.25	51.75	63.75	36.5	76.75	41.25	25.5	110	99.5	68.75	98	191.5
108.25	54.75	53.5	32	80.5	56.5	28.25	104.5	93.25	82.75	90.75	192.5
80	62.25	71.25	46.75	77.5	53.75	30.75	115.75	98.5	81.25	88	200
82	72	78	45	93.25	53.5	34.5	102.25	98.25	73.75	100.5	195.5
87.25	72	72	42.25	96.5	60.5	32.5	95	90.5	73.75	85	200.75
99.75	73.75	81.75	50.25	87.25	62.5	38.75	102	101.25	75.25	104.5	193
98.25	69.5	68.75	53.5	67.75	60	22.5	120.5	103	82.5	75.5	209.75
81.5	61	51.75	47	81.75	45.75	11.5	95.25	88.25	66.75	77.75	171.5
76	58.75	54	47.25	74.25	53.25	15.75	93	101.5	60	78.5	148.25
88	63.5	76.25	48	94.25	65.25	21.25	87.75	97	73.5	81.25	175.75
74.25	41.75	56.75	29	53	43.5	13	62.25	86.75	52.25	48.25	123
49	36.75	40.25	17.25	48.5	34	8	38.75	59.75	27.5	27.5	100.5
45.5	35.75	40.75	19.75	39.25	21.5	13.75	34.25	49.75	32.25	29.25	103.25
50	27	44.25	22.25	34.25	31.25	11.25	45	46.5	26.75	24.75	99.75
74.25	54.75	64.75	35	77.75	47	11	64.75	81.5	55.75	52.75	135.75
95	85.75	90.75	77.5	94.5	73	26.75	114.75	96.75	84.5	83	181.5
75.25	72.25	76.75	58.5	85.25	71.25	18.25	112.25	98.5	80.75	85	175
89.5	61	73.25	36	84	71	23.5	88.5	101.75	65.25	75.25	169.5
51.25	29.25	40.5	10.5	40.5	29.75	15.5	41	56.75	37.75	38.25	120.5
54.75	22.75	40	11	47.25	26.75	9.5	46.25	53.75	30.75	36.5	112.25
34.75	26.5	42	15.5	32.25	28.25	17.75	34.25	51.25	30	36	110.75
48	39	48.5	28.75	46.75	28.75	20.25	42.5	40.25	31.75	39.75	120.75
36.75	21.25	40.75	14.5	37	33	10.25	45.5	52	25	38	111.75
34	29.75	45.5	16.5	41.25	19	16	37.75	39.25	30	41	103.5
40	33	39	23.75	50.5	37.5	21	44.5	43.5	27.5	38.25	90
27	29.5	44	21.5	33.25	17.75	12.5	40.5	35.25	23	29.5	102.75
38	27	41.5	22	36	20.25	17	46	40.5	30	31.25	103.75
42.75	22.5	35	13.5	33.5	22	15.25	29	50.5	28.5	30.5	101
27.75	21	35	10.25	27.75	22.5	8.5	33.75	40	25	23.25	91.75
48.25	32	38.5	22.25	34	25.75	13.25	36.75	36.25	32.25	32.5	98.25
45.25	24.75	44.5	11.5	37.75	28	9	41.75	48.25	25.25	28.5	97.25
38.25	39	38.5	23	41.75	30.75	22.5	36.75	41	24	35	95.25
90.75	62.25	68	25	74.5	62	18.75	105.5	103.25	70	72	169
61.25	49.25	43.5	34.5	37.5	35.5	13.25	100.5	88	54	56.5	151.75
68.5	48.25	54.5	23.75	48.25	34	10.75	92.5	87.5	55.5	58	150
89.5	66.25	67.25	40.25	60.5	47.75	15	112.25	97.5	59.75	72	173
61.5	40	48	23.5	41	35	12.75	79.75	78.25	45.25	47.25	134.25
70.25	50.25	49.5	25.25	55.5	38.5	12.5	82.5	85	47.25	50.25	145.25
77.5	55.75	59.25	20.25	58.5	38.5	13.75	94.75	85.25	52.25	52.75	154.25
75.5	39.5	57	28.5	44.25	36.5	14.75	88	80.5	44	54.25	142
72.75	56	63.75	34	54.25	41	17.5	91.25	81	53.5	53.75	147.25
79.75	50.75	61.5	24	48.5	36	16	97.75	87	50	61.75	154.25
84.5	50.5	55.5	21.75	62.5	47.75	16	102.5	91	57.25	55	165.75
62.5	38.75	49.5	23.75	46.75	37.75	18.25	83	75.25	44.25	46.75	133.5
80	53.25	58	19.75	62.75	39.75	16.25	84.75	83.5	43.5	52.5	143.5
83.5	55.5	59	17	43.75	28.75	20.75	76.25	75.25	49	51.75	153.75
83.5	67.5	56.5	29.75	64	43.75	23.25	92.5	82.25	60.25	56.25	150
103.5	65.5	66	36.75	66.5	63	27.25	106.75	93.75	70	75	187.75
68	37.25	49	19.75	33	41.25	17.25	105.5	91.75	50.5	66.25	159.75
91.25	67	87.75	42.5	71.25	62	28.5	111.75	102.5	64.25	83.5	175
83.25	67.25	62.25	45.5	73.75	51.5	23.25	91.75	91.75	56.75	71.75	165.25
90.25	74	74.25	53.5	93.75	69.25	28.25	95.75	110.75	64.5	78.5	166.5
109.25	75.25	74	45.5	97.75	60.5	25.25	99	107.25	68	61.75	165.25
96.75	66.75	66.75	51	81.75	51	24.25	85.25	101	60.25	72.75	159.5
94.5	43.25	63	30.75	70.25	51.25	17.75	85.5	100.75	51.75	60	145.25
100.75	81	46.25	18.75	51.5	33.25	17	96.75	87.75	72.25	54.5	164.75
78.75	46.25	66	21	58.25	42.5	14.5	115	96.25	69	55.5	168.75
79.75	37.5	46	21.75	65.25	41.25	15.25	93.5	79.75	58	51.25	175
96.75	48.75	75.25	29.75	90	66.75	26.75	105.25	101.5	77.25	58.25	189.5
98.25	66.5	77	37	92.5	63.75	45.75	118	91.5	84.25	69.75	178
114.25	79.5	100.5	58	99.5	66.25	27	114.5	96.5	84.75	72	184.75
93	77.25	81.75	63.25	70.5	66.5	37	105.5	103.25	71.25	87.25	175.75
53.25	27.75	43.25	13.75	47.25	37.5	7	93	70.75	60.75	71.75	167.5
91.25	58.25	69.5	37.75	73.75	57	25.5	112.25	101	84.5	85.75	193
64	28.5	43	14.5	40.5	27.25	8.5	94.25	77.75	65.25	73.5	158.25
74.25	38.25	63.5	16.5	53	36.25	14.25	95.75	75.25	60	64.25	171
76.75	42	73.5	24.5	57	42	12	85	87	54.75	62.5	160
91	57.25	84.5	50	69.5	57.75	21	99	104	72.25	70.75	166.5
97.25	67.25	60.5	74.25	102	93.25	35.75	91.75	91.5	63.75	90.25	166.5
92.75	58.25	44	73.25	90.25	61.5	35.75	95	102.5	69.5	88.5	153.25
97.5	60.25	49.75	91	71.75	62.25	31.25	93.25	89.5	66.25	77	174
90.25	71.75	61.5	76.5	88.25	68	22	96.25	97	68.5	77.25	167.75
99.75	55.25	56	68.25	104	71.25	19.75	101.75	106.25	78	69.75	175.25
100.5	67	57.75	72	83.5	60.5	25.5	103.75	92	68	79.25	167
96.75	68.5	63.5	72.5	94.5	59.5	28	108.75	94.5	82.25	81.25	191
87.25	77.75	82.25	56	104.75	72.5	26.5	119.25	94.25	84.25	76.25	178.75
125.5	78	75.25	55.75	87.25	74	27.5	113.75	99.75	76	93.75	171.5
122.25	76.5	63	56	81.25	65.25	36.25	110	107	77.5	96.75	167.75
109.5	54.5	83.75	37.5	56	45	30	125.5	126.75	83.25	95.5	205.5
92	36.5	63.5	35	45.25	38	16.5	102	98.5	80	84.75	178.75
79.5	36	45.25	21	45	28.25	12.25	95.75	76.5	53.25	86.75	178.5
75.75	33.5	42	26.75	38	29.75	9.5	86.25	66.75	46.25	88.25	156.75
84.25	36.75	48.5	26.75	33.75	28.5	8.75	88.75	67.25	50.25	93	161.25
83.75	38.75	50.5	28.25	43	26	9.75	102	78.75	55.75	102.5	165.75
81	35.25	40.75	28	47	31.5	9	95.5	66.75	53.25	112	153.25
75.25	28	55	24.5	51.25	31.75	13	87.25	87.5	58.75	65.5	173
103.5	60.5	90	37.5	65.5	39	21.25	100	96.75	70	71.25	159.5
87.75	64.5	69.25	28.25	51.75	38	13.5	101	73.5	48	54.5	147.25
87.75	57	76.25	23	53.25	34.75	17.25	98.25	84.5	60.75	62	177.75
72	45	61.75	17.75	37.75	38.75	11.75	93	58.5	51.25	52.25	157.5
83.5	47	64.25	22.75	42	37	12	99.75	74.25	54.75	61.25	159.5
90.5	53	69.5	26.75	60.5	48	14.5	95.75	77.75	56.5	64.25	168.5
76.25	42	78.5	23.5	51.5	35.75	9	84.5	74.75	53.5	57.25	166.75
90.25	56.25	77.5	19	60.25	42.25	11	95.25	75.75	54	60.5	171.75
83	43	59.25	24.5	63.5	38.75	7	87.75	62.75	59	66.75	171.75
84.5	44.25	67.75	22.25	53.5	39.5	11.5	92.5	66.5	50	64.75	168
86.25	54.75	72	23.5	55.5	41.25	10.5	97.25	76	57.5	65.25	175.25
86	47.5	76.5	35	72.5	38.5	13.25	105.5	82.5	67	72	184.5
90.5	56	77	30.5	66.75	38.25	13.75	109.5	73	63.25	74.25	190.5
83.75	61.5	47.25	26.5	70.75	40.25	9.25	103.75	82	59.25	63	155.5
78.5	52.75	69.5	20.25	55.25	32.25	12.75	102.5	71.75	52	59.25	174.25
78	58	66.25	34.5	52.75	37.75	15.5	111.25	92.25	60.75	62.25	154.5
65	50	49	23	41.25	27.75	7.5	78.25	67.25	41.25	50.25	131.75
85	47.5	71.75	27	61	42	10.75	98.25	74.5	60.5	60	171.25
81.75	52	67.5	21.75	55.75	42	10.75	91.5	78.25	65	65.25	183.25
68.25	48.25	73.25	31.5	62	35.75	10	103.5	89.5	52.5	58.5	147.25
75.5	44.75	50.5	32.5	44	33.75	15.75	100.75	73.75	50	57.5	147
80.25	46.25	79	26.25	65.25	43.25	13.75	98.25	81.5	46.75	56.75	153.5
66	50.75	47.5	29.5	48	28.75	16.75	79.25	71.75	51.25	58.5	144.5
76.25	47.25	59	26	52.5	46.25	11.75	98	72.75	60	70.5	169.25
73.75	51.5	54.5	22.25	47.5	34.5	13.5	98.75	78	65.5	60.75	173
74.25	49.5	62	28.25	54.25	39.75	11	101.25	73.5	48.25	56	162.75
84	60.5	80	31.25	61	37.75	15.25	104.75	85.5	60.25	74.75	192.5
98.5	73.25	62.75	46.75	60.25	52.75	31	104.25	79.75	69.75	78.5	176.5
68.5	46.5	60	17.75	48.25	39.5	12.25	100.5	84.5	58.25	62.75	177.25
81.5	46.5	69.5	15.5	56.25	38.75	26.5	103.5	87	55.75	61.75	159
115.25	83.5	78.75	43.5	79.75	59	29	129	110.25	83.5	99.5	182.75
83.25	68.25	80.5	46.75	60.75	56.25	23.25	104.5	97.5	66.5	72.25	186.75
75	40	60.5	13.25	47	38.5	12.25	83.25	75.25	46	49.5	157
103	98.25	77.5	59	80	54.25	22.75	118	114.5	72.75	86	186.5
73.25	60.75	66.75	36.25	53.75	41	16.25	97.25	87	51.5	73.25	158.5
88.75	84.5	78	29.5	59	38.5	23.75	104.25	77.75	70.25	76.25	172.5
90.5	67	79.25	47.5	72	39.25	15	112	74.75	60	72.5	178.5
99.5	64.75	74	38	55.75	42.25	31	121.75	90.75	82.25	108.25	197.5
76.25	45.75	68.5	35.5	30.75	32.75	15.75	126.25	92.75	73	106.25	191.25
84	48	62.5	23	50.25	44.75	18.5	134.25	79.25	67	102.5	201.5
54.25	26.25	49.5	19.25	42	27	8.25	107.5	63.75	52.75	77.75	164.5
82	42.75	62.5	22.5	49.5	35.25	11.75	113.5	74.5	62.25	92.75	195.75
105.25	66.5	92	42.5	71.25	58.5	32.25	124	89	76.25	83.5	192.75
112.25	89	84.75	53.75	83.5	55.25	36.25	107.25	99	76	74.75	177.5
115.25	90.75	87.75	47	72.5	56.25	30.5	120.5	107	98.25	91	194.25
72.5	69.75	43.25	27.75	48.5	40.75	15.5	114.25	87.5	79.25	82	206
82.25	65	52	31.5	68.75	44.25	19	114.5	88.25	75	105	200.25
91	52.75	83.75	31.25	79	61	15.25	99	108.5	64.75	75.75	153.25
104.25	70.25	91.5	36	77	51.5	10.25	118.5	104	79.5	74.5	169.5
91.75	37.5	61.75	29.5	39	30.5	5.75	99.75	70.5	55.5	63.75	146
72	30	69.25	24.5	42.75	29.5	5.25	93.75	73.25	51.25	50.75	137
75.75	21.75	59.5	19.75	38.5	23.25	7	78.25	62.5	40.25	52.75	126.5
42.5	27.5	43	22.25	25	19.5	6.75	59.75	46.75	24.75	33.25	96.25
47.25	38	44	24.5	36.75	26	15.5	55.75	43	27.25	24.75	110.25
37.25	27	37.75	12.75	31	19.75	15.75	40.5	44	18.5	26.5	78.5
37	22.5	35.75	20.25	37	18.5	7.5	42.75	29.25	21.5	29	92.25
42.25	19.25	45.75	29.25	23.25	31	21.75	42	44.5	22.25	28.25	90.5
42.75	22	41.75	13.75	37.25	20.5	14.25	47.75	41	26	34	80.25
66.25	29.75	61	18.5	44.5	20.5	6.25	72	58.25	45.25	58.25	133
54.25	26.25	55.75	14.25	33.75	16	6.25	67.25	54.5	34.5	42.25	111.25
39.75	28.75	41.75	17.5	39.75	14.75	14.75	57.5	32	25.75	21.75	103.75
27	39.25	31.5	27.5	26.75	28.5	20	43.5	38.5	25	43.25	74.5
38.5	33.75	31.5	26.75	33	16.75	14	42.25	33	26.5	32.5	82.5
47.25	27.25	44.5	19.25	39	31.5	20.25	51.5	41.75	31.75	42.75	81.25
66.5	37	57.75	10.75	48	22.5	3.5	106.25	62.75	60	73.25	140.25
74.75	36	57.75	16	48.25	23.25	9	110.5	65	51.75	67.5	140
83.75	35.25	63.75	13.25	48.75	27.25	3.5	103.75	64	54	68.25	139.75
80	48	61	23.25	52.75	29.25	8	102.75	66.25	55.25	68.5	147.75
69.5	33	54	22.75	43	24.75	5.25	83	63	52.25	58.75	141.25
67	33	54.5	25.5	42	26.5	6.25	87.25	65.25	47	55.25	126
44.25	23.75	40.25	19	28	18.25	7.25	52.5	38	25.25	26	91.5
41.75	28.25	35.25	23.75	47.25	14.75	12.25	46.25	29	21.75	18.5	88.25
55	32.75	44.5	28	37.5	23.75	17	72.25	56.25	33	53.25	112.75
74.25	37.25	61.5	15.75	43	23.5	7.25	79.75	65.75	50.5	54	137
71	35.5	64.5	24.5	51.75	26.5	6.25	96.5	65.75	63.25	65	145
63.75	31.5	53	22	34	25.25	8	89.75	57.25	40.25	59.25	135.75
77.75	39	51	21	45.25	27	9.75	95	65.5	44.25	69.25	141
51.5	21.25	41	19.75	34.25	19.5	9.5	84.5	45	27.75	38.25	107
32.75	44.5	38.75	35	44.25	38.75	37.25	49.25	35.75	27.5	37.75	85.5
49.75	37.75	45.25	28.25	31.75	27.5	17.5	38	26	24	28.5	93.25
68.25	28	51.5	14.25	39.25	17.5	6	88.5	62	39	54.75	126.75
83.5	50	63.25	24.75	51	26.25	8.5	89.75	77.5	52.25	72.5	155
75	34	60.5	34.25	45	27.25	6	92	65	46.25	68.25	146.25
76.25	54.75	50.25	27.5	71.5	54.25	9	84.5	79.25	65.5	83.5	151.5
87.25	60.5	68	33.75	75	50	19.25	100	85.75	67.25	78	172
79.75	42.25	63.75	40	60.25	35	7	110	74.25	50.75	70.5	158
94	58.5	76.75	49.5	76.5	49	21	100	80	65.5	72.5	168.5
98	71	61.5	25	75.75	37.5	18.5	95.25	89.75	66	67.5	182.25
88.5	64	72	30	73.25	37.5	22.5	88.75	84.5	75	82.75	179
92.5	56.75	67	31.25	74.5	35.5	30	92.25	96.75	73	68.5	190.5
96.75	39.75	66.25	24.25	87	38	26.75	94.25	88	71.5	64	172.5
99.5	55.25	71.75	33.75	77.5	49.25	33.75	109	91.75	74.5	80.5	175
99.75	56	66.5	32.25	88.25	45.5	17.25	103.75	88.5	71.5	80.75	194
95.75	48.75	52.5	24	75.25	26.75	11	112	94.25	67	81.25	194
103.25	54.25	72.25	33.25	77.75	43.75	17.25	98.75	92.25	64	64	179.25
93.75	48.25	62	32	72.5	36.5	14.75	80.5	91	59.25	56	165.75
89	41	60.25	35	71.25	34.25	16.25	93.75	106.25	67	54	171.75
99.25	39	73	45.5	88.5	49.5	14	90.25	93	64.75	79.5	160.5
79.75	34.5	38.5	17.5	37.25	17.25	8.25	98.25	72.25	56	61.25	167.75
76.75	26.25	36.25	20.25	40.5	22.75	7.5	97.5	61.75	64.75	68.25	159.5
73	26.25	38.25	25	42.75	24.5	11.5	83.75	71.5	54.5	63.75	171.75
87	34.75	36.75	18.75	50	31	10.75	85	73.5	59.25	63	167
63.75	35.25	35.25	25	35.75	24.25	7.25	82.75	66.75	61	53.75	163
62.75	29.25	35.5	20.75	38.25	24	11	79.5	65	56.25	58.75	149.5
70.75	29.25	39.5	19.5	45.5	25	4.5	98.5	65	53.75	68.5	168.5
67.75	35.25	41	20.5	54.75	27.5	9.25	97.25	68	61	71	165.75
53.75	34.75	38.75	25	37	25.25	9.25	82.5	56.75	54.5	53.75	153
84.5	37	48.5	21	64	31	9	94.75	79.25	70.75	71.25	179.25
67.25	31	32.25	22.75	39.5	20.5	12.75	91.25	61.25	56.5	58	159
78.25	36.5	32	22	45.5	24.5	6.5	96.75	66.25	59.25	64.75	161.25
71.25	32.75	36.25	23.75	41.25	22.25	7.5	89.75	64.75	58	59.75	145.75
65.75	38.25	34	20.25	47.25	21.75	8.75	85	58	49.75	52.25	152.75
65.75	35.5	31.75	21.75	41	28.5	6.5	87.75	67.75	57.25	62	145.5
57	30.5	32.75	16.25	42.25	29	8.75	82.75	53.75	45.5	59	138.75
61.75	32.25	36	17.5	40.25	26	7.75	73	54.5	51.5	56	141.5
55.75	28.25	29.75	19.5	39.5	23.5	8.75	75	60.5	47	46.25	136.75
74.75	36	48.5	15	47.5	26.5	9	88.75	73.5	48.25	77	163.75
64.5	39.25	39.5	25.25	57	35.25	10	102.75	59.25	50.75	71.75	139.25
62.75	37.75	33.5	16.25	46.5	25.25	7.75	88.5	51	38.25	59.75	146.5
67.75	38	39.5	23.25	52.5	32.5	9	82.25	63	49.75	58.5	140.5
95	52.5	59.75	42.5	55.75	47.5	14.25	103.5	79	58.75	69	177.75
45.75	30.25	37.5	22.75	32	14.75	14.5	64.25	57.5	24.75	36.25	102.75
95	40.75	58.25	31.25	61	43.75	14.75	82.5	82	47.75	71.75	150.75
70.5	31.25	42.25	24	50.25	24.5	10	78.25	61	47.5	53.5	133
108.5	49.25	64	39	79.75	45.5	22.5	87.25	75.75	53	68.75	148.25
41.75	27.5	47.25	11.5	40.5	19.25	12.25	44.25	47.25	26.5	26.25	87.25
30	26.75	29	22	40.25	16	25.25	47.5	33.75	22.75	27.75	89.75
40	47.75	28.25	37.75	47	27.5	26.25	37.5	32	24.5	29.5	83
45.75	40.25	39.75	39	24.75	34.5	25.5	53.25	53.75	33.25	72	102
41.25	42	34.75	31.25	29.5	35.75	24	38	39.5	21.5	30	65.75
43.25	32.75	37.25	27.25	30.5	22.25	13	50.75	39.75	25.25	27.75	79.5
38.75	30.25	31.5	27.5	31.5	20.25	12.5	21.25	21.25	18	32.5	77.75
43	30.5	33.75	30	21.25	18.25	15.75	40.25	33	18.25	56	79.5
31.25	29.75	30.25	36.75	21.25	30.25	24.5	42.5	49.5	22.75	32.5	69.5
50	23.75	28.25	13.5	39.25	22.25	16.25	33.5	18.25	19.75	29	88.75
58.75	37.75	44.5	36.25	24.5	27.25	21.25	40.25	36.5	23.25	47.5	71.75
47	26	35.25	22.75	37	20.25	18.25	37.75	29	30	37	70
31	27.75	35	16.25	31.5	14	6.75	22.75	34	13.5	16.75	49.25
28.25	31.75	23	24.25	26.75	26	15	34	27.5	17.25	31.25	65.25
53	41.25	51.25	27.25	28.5	28	16.5	37.75	27.25	20.25	39.5	73
42	31.25	33.5	36.75	25	25.75	28	37.75	39.25	20.25	34.25	70.5
37	27.25	28.75	29.5	21.5	15	14.25	26	29.25	13	30.25	54.5
41	32.25	34	34	36	21.25	25.75	23.5	27.75	24.25	32.75	74.75
30.75	43	35.25	24	23.75	22.75	23.25	18.25	24.5	17	29.25	64.75
33	36	26.5	27	18.25	17.75	10.5	39.25	38.5	21.75	37	66.5
49.75	15.5	35.5	15.25	30.25	16.5	12	24.5	18.25	16.5	22.75	71
49	40.25	42	41.25	26.75	20	20.25	35	31.5	18.25	27.5	52.25
65	36.5	46.75	29	33	33.75	25.75	40.75	28.75	27.25	57.75	75.5
37.25	22.25	29.5	11	18.5	13.25	8.25	37.25	30.5	16.5	34.25	65.25
38.25	30.75	33.25	18.75	32.75	18.75	14.75	23.5	24.5	17.5	33.5	54.5
21.75	30.5	20	24.75	28.75	23.5	12	19.25	20	18	22.75	63
29.5	29.5	25.5	33	19.25	19.75	21.25	32.75	34.75	13	41.75	56.75
29.75	34.75	31	17.75	28.75	24.5	14.75	29.5	17.5	15.75	28	69.75
56.75	40.75	35	27	30.5	33.75	21.75	31.25	22.75	20.5	29	61.75
36.25	18.5	27	14.75	22	14.25	13.75	24	25.5	17.25	34	50.25
41	36	33	32	24.25	30.25	15.25	34.75	32.75	22	34.75	62.5
66	35.75	51.5	30	33	32.5	26.75	36.25	36	27	47	80.75
49.25	25	30.5	19.25	26	30.75	18.75	39	31.25	18.5	45.75	64.75
59.5	38.5	47	26	37.25	22.25	17.75	42	25.75	21.75	48.75	78.75
59.5	33.25	51.75	25.5	52.75	15.5	9	37.75	30.75	19.5	34	68.25
36	21.25	32.25	15.5	19	16.25	10.5	31	31.5	15.25	26.25	55
23	35.5	24.5	26.5	29.25	23.75	14	37.75	21.5	21.5	38.5	66.25
30	37.5	25	25.75	38.75	17	15.25	30	30.25	22.5	32.75	62.5
38.5	30.75	39	29.5	31.5	21.75	17	31.25	26.5	18.25	37.75	70.5
50	32.5	47	34.75	36	31.75	16	27.5	21.5	17	39.5	75.75
29.5	23.75	32	27.5	25.75	15.75	15	30	27.75	17.25	25.5	45.5
33.25	24	27.5	22.5	25.25	18.75	14	26.75	28.5	21.25	36	60
61.25	23.5	33.25	9	32.25	18	10.25	26	14.5	19.5	32.5	87.25
52.25	31.25	38	25.5	27.5	18	17.75	42	25	23	45.75	64.75
59.75	40	51.5	37.75	36.5	45	21.5	32	24.75	24.75	39.5	73.5
33	31.75	24.5	18.5	18.5	20.25	7	20.75	31.75	12.25	18.75	41.5
24.75	32.75	31.5	20.75	20.5	19.5	12	21.25	21.25	13	23.75	56.75
40	32	36.25	26.75	31.75	18	11.75	25.25	20	16.75	41.5	59.5
41.25	29.25	33.25	21.75	26.25	15.75	9.75	30.75	25.25	15.5	34.5	73.75
50.25	30	33.5	27	21	21.5	11.75	42	29.25	18	41	62.5
42.5	19.25	27	21.25	33.25	19.25	15.25	26.75	19.75	13.75	22.75	68
26.25	31	25.75	29.25	29.75	25.5	13.25	20.75	18.25	14.5	21.25	54.75
34.25	27.5	23.75	28	17.75	18.25	9.5	31.5	28.75	20.25	37.5	61
51.25	20.25	34.75	16.75	23.25	17	11.25	19.25	13.5	14.5	24.75	56
39.75	33.5	32.25	22.75	25.75	29.5	18.75	39.25	31.25	20.25	44.25	67
42.5	29	30.5	15.75	33.5	22	9.75	28.25	25	16.25	30.5	66.5
64.75	47.75	46.5	42.25	42	38.25	25.75	31.75	23.75	26.5	39.75	89.25
55.25	26.5	40.5	28.75	33.5	28.75	24.25	36	23.75	22.75	35	73.25
52	38.5	44.5	31.75	25	41.25	20.75	28.25	32.25	19.75	33	61.25
48.75	33	39.25	18.5	26.25	25	19.75	37.5	31.25	20.5	37.75	62.5
50.5	27.25	34.5	22.5	21.75	27.5	8.25	32.25	39.75	16	33	68.5
52.25	33.75	52.75	26.5	32.75	35.5	20.75	33.25	33	22.5	43	75.75
47.5	18.5	32.75	12	34.25	11	16.25	28.5	25.75	16	26	58.5
59.5	24.75	41.75	11.5	28.5	22.25	12.75	48.25	28	19	35.75	79
25.75	16.25	29	12	14	18.5	8.75	30.5	24.25	15.5	24.25	61
57	20.25	31.75	19.25	18.75	23.25	12.75	47.75	34.5	28.5	58	93.25
31.5	27	31.5	13.5	35	16.5	11.75	29.5	29.25	21.25	33	63.75
36	29.75	32	24.75	45.25	17.75	10.25	19.75	21.5	15.25	46.75	58.5
41	33.75	35.25	26.25	25.5	22.25	16.75	33.5	17.5	19.5	31	58
47.25	25.5	48	19.5	61.75	20.75	9	30.25	33.25	22.5	26.5	65.5
48	22	44.75	18.75	38.5	20.25	13.25	38	31.75	23.25	22.75	77.25
31	19	27.25	13	38.5	14.5	12	18.5	14.25	13	20.25	56.25
32	31.5	24.25	16	25.25	23	11	31.75	27.5	17.75	35	66.25
41	47.75	32	42.5	37.5	30.5	24	29	20.75	19.75	40.75	74.75
30.25	34.75	31.25	24.75	38	25.25	14.25	24.5	28.25	15.25	36.25	57.25
38.5	25	29.75	26	22.75	19.75	15.5	32.75	24.25	13.25	29.5	53
20.25	20.25	21	20.5	26.25	14	7.75	28.25	15.5	13.5	27	55.75
46	29.5	39	21.5	26	24.5	16	33.75	25.25	32.5	39.5	82.5
43.25	43	40	38.75	17.75	24	18.5	31	32	25	41.5	63.75
32.75	27	31.5	18.5	37.75	15.25	13.5	20	17	16.75	36	57
42.25	32.75	47.75	30.75	35.5	24.5	12.25	28.75	16.75	17	31.5	64.75
41.75	36.5	40	33.5	19.25	22	23.75	28.25	25.5	25	45	70.5
38.25	28.5	31.25	22.25	22.75	17.75	16.75	27.5	18.25	18	41	71
40.75	32.5	33.25	19.25	30.5	22.25	11.25	32.75	22.5	18.25	24.25	66.75
42.5	35.5	38	30.5	33.5	24.75	16.5	20.25	27.75	15	34.5	50
45.25	29	30.75	20.5	27.5	24.25	13.5	42	25	16.5	38.25	71.75
35.5	29.25	25.25	23.25	27.75	18.25	12.5	20.25	18	18.5	22.5	53
42	34.5	42.25	20.5	28	16.75	12.5	29.25	25.5	17.5	22.25	57.25
37.75	29.75	26.5	24.25	19	17.25	16.25	23.75	21.5	15	32.5	62.75
30	22	21.25	7.5	16	15.25	5.5	28.75	21	13.75	34.5	58.75
41.5	31.75	42	25.25	34.5	24.25	12.75	27.5	19.25	18.5	34.25	64.75
43	32.75	44.5	36.5	30.75	32.5	24.25	20.75	20.25	18	36.25	57
47	32	28.75	14	27	24.25	12	24.75	21.5	15.75	26.75	62
37	26	24.75	25.25	30	20.5	13	29.75	21.75	18	47	68.5
35.25	32.25	31.5	19.25	23.25	17.5	14.5	20	19.25	12	30.5	56
31.75	28.25	31	25.25	37.25	19	14	20	16.25	17.75	30.75	60.5
54	30.25	43.75	28	41.75	19.25	10.5	25.5	24.5	15.5	28.5	61.75
33.75	29.5	36	26.25	24.5	21.25	16.25	21	17	13.75	30	43.75
48	27	36.75	13.75	24.75	21.25	13.5	26	27	17.75	38.5	62
25	25.5	21.75	16.75	16	11.5	14.5	31.5	17.75	14.5	47.75	56.5
32.25	28	17.75	24.25	24.5	29.5	10.75	15.5	11.75	16.25	27.5	58.75
47.25	30	38.5	15.25	19.25	18.75	11.25	27.25	20.75	17.25	37.5	74.75
40	28.75	42.25	23.25	29.25	20	20.75	18.25	13.25	12.25	33.5	60.25
40.75	34	34	32.25	31.25	31.75	15.75	31	26.5	18.75	33.5	71
32	24.25	24.25	13.75	23.5	16.75	6.5	23.75	25.75	13.75	21.25	41.25
41.25	21.5	32	9.25	38.75	16.5	3.25	21.5	22	12.75	20.75	39
32	25.25	30.25	23	31	20	8.25	15.75	8.75	15.5	22.75	43.75
24.5	26.75	23.25	18	28	28.75	14.25	29.5	19	16	32	48.5
56.75	30.5	29.25	23.25	35.25	25	10.25	32	18	24.25	38.25	82.25
43	32.25	43.5	26.5	34.5	35	18.5	22	18.5	15.75	40.5	62
41.5	30.5	33	19	24.5	21.75	10.75	28.75	31.25	15.25	30.25	44.75
24.75	27	25.75	22.75	18.75	18	12.75	24.5	17	19	33.5	53
43.25	30.75	30.75	21.25	25.5	17	7.75	33.75	31.75	22.25	40.25	63.25
43	22.75	32.25	15	25.75	22.5	7	35.5	25.5	22	41.5	64
40	24.25	41.5	31	31.75	21.5	12.25	27.5	18.75	14.25	32.5	51.25
29	22.5	32.25	19.25	29.75	11.25	13.25	16.5	12.25	15.25	33.75	58.5
35.75	25.5	25.25	17.25	17.5	16.25	11.5	30	20.75	16.75	38	63.75
45.5	29.25	26	18	37.75	24.75	18.25	25.25	15	10.25	25.75	54.75
57.75	29.5	37.25	23.5	35.75	27	13.75	25.5	20.25	17.75	32	66.75
49.25	31.5	34.5	34.25	36.25	25.75	22.25	25.5	23.75	25.5	37.25	73.5
44	36.5	43.25	25.25	28.75	27.5	14.75	25.75	29.75	16.75	26.75	49
35.5	16.25	21.25	10.25	14	15	5.5	25.75	16.75	14.25	39.5	69.75
25.75	25.5	26	20.75	18	16.75	11.5	21.75	20.75	14	35	50
35.5	24.75	41.25	15.25	22.25	15	12.75	21.25	17.75	16.75	37.5	72.25
24	17	26.75	17	24.25	16.75	13.5	15.5	11.5	9.5	21.25	46.75
38.5	44.25	42.75	32.25	27.5	29	15	26	21	21	36.75	68
29.75	36.25	28.5	20.5	19.5	30.5	15.75	25.5	21.75	21.75	42.75	59.25
33	24.25	31	14.75	19.75	12.75	9.25	30.75	15.25	14	27.5	53.25
46.75	24.5	27	17	26.75	15.75	11.75	29.75	17.5	15.25	36.5	62
65.25	41.25	43.75	30.5	39.25	29	17	19.75	15	12.25	35.5	67.5
35.25	18	25.25	23.75	20	19.25	9.25	28.75	23.25	14.75	26	58
51.5	29.75	34	18	36.25	20.5	23.25	21	11.75	17	24.75	57
54.25	33	38.5	29.25	32.5	37.5	22.25	32.5	23	28.25	43.25	72
38.25	21.5	29.25	23.25	17.25	17	12	38	25.25	19.5	38.75	62
49.75	27.75	37.75	14.25	41.75	20.5	18.5	18	21.25	14.25	26	48
31.5	20	24.75	10.75	23.25	8	8	25	16.5	13.75	29	51
42	19.75	34	15	29.25	13.75	12.5	26.5	16.25	19.25	29.75	56.25
30.5	23.75	36.25	13.25	27.25	11	10.5	20	15.5	12	26.25	45.25
32.5	25.75	20.75	11	24.75	19.75	8.5	24.75	19.5	14	31.25	50.5
35.25	34	35.75	25.75	21.75	24	19.75	32.25	23.5	19.75	40.75	65.5
47.75	29.25	31	17	37.5	20.25	13.25	31	16.25	14.75	35.5	67
40.25	25.5	43.25	24.5	25.75	24.5	17.75	28.25	17.5	16.25	30	70.5
50.5	29	28.5	18.5	33	17.75	12.25	26.75	16.25	12.25	23.75	47
34.25	26	34.5	20.5	25.5	18	16.25	19.75	18.5	12.25	25.5	63.5
33.25	35.5	39	30.5	33.5	21.75	14.75	20.75	19.25	22	27.5	61.75
31.25	17.75	29.5	12.5	18.75	11.5	8.75	29	18	17.25	30.75	63.25
40	35.25	35	25	35	30	16	15.5	11.75	15.25	37	53
42	27.5	32.5	18	22.5	23	7.25	20.5	22.25	12.5	29.25	54
47.5	20	29.25	5.75	28	18.75	12.5	17.75	16	11.75	24.75	37.25
32.5	18.75	22	19.25	30.5	20	10	16.75	11.75	14.5	24.5	51.5
27.75	35.25	36	31.5	28.75	15.5	18.75	30.75	24.25	20.25	46	57.25
49.25	25	27	14	26	18.5	10.5	23.75	17.5	9.25	22	60.75
54	32.25	48.25	21.75	31.75	23.75	8.5	36.75	24	25.25	36.25	80.75
32.75	35.75	39.5	26.25	40.5	21.5	24.75	20.25	17.5	10.5	26	55.5
41.75	38	33.25	25.5	27.25	31.25	18.75	20.25	17.5	14.75	29.5	48.75
47.5	31.25	29.75	16	15.5	16.25	9.75	45.25	26.25	18.75	44.25	63.25
61.25	26.75	37.25	19.75	32.25	21	21	29.75	22	19.25	37	70.5
46.75	25	33.5	16.75	33.5	24	12	22.75	18.5	13.75	28.75	62.5
25.25	24.25	22	20.25	18.75	20.25	8.75	20.25	22	14	29.75	52
28	28.5	8.5	12	24	18.75	13.25	18.75	16.5	16.25	28.75	51.25
43	26.75	48	31	24.25	24.25	14.25	28.75	16.75	12.25	27.25	62.25
27.75	30.25	37.75	29.75	27.25	21.25	17.75	13.75	13.5	18.75	30.75	51.5
41	43	29.5	31	25	29	19	32	22.5	18	46.5	61.5
40.75	31.75	39.25	21.5	34.75	25.25	11.75	32.25	19	16.25	29.75	61.5
46.75	24.75	30.5	18.5	17.5	15.75	16.25	27	26.75	16	36.5	63
45.75	29	35.25	22.5	23	27	16	35	25.25	14.5	30.75	63.75
50.25	21.75	36	18	37.5	23.25	18	26	17	17	22.25	62.25
59	29.25	41	29.25	36.25	28.75	20	37.5	33	28	41.25	83
46	30.5	36.5	18	19	17.5	11.25	30.25	29	16	29.25	63.75
51.25	15	38.75	12	33.25	13.75	14.5	18.25	14.5	14.75	24.5	70.5
48.25	18.25	36.25	9.5	44.25	22	18.75	24.25	23.5	13.75	22	63
36.25	24	40.25	11	22.75	20	14.25	28	20.5	14.5	23.5	57.25
43	29.25	33.25	10.75	34.25	28	8.75	30.5	20.75	10.25	25	51.5
46	38.5	37	13.75	32.25	26.75	10	35.5	24.75	14.5	20.25	56.5
43	34.25	45	18	50.25	31.5	15.75	38	28.5	12.75	14.5	56.5
51.75	45	38	7.5	41.75	40	19	36.75	24	17.25	22.5	52.5
35.75	35.25	33	7.75	22	17	5.75	30.25	19.5	15.5	32.5	50.5
54.5	30.5	23.25	12.5	30.75	23.25	7.75	40	20.25	14.5	19.25	71.5
69	48.25	50	33.75	41	48	12.25	40.25	39.75	23.75	30.5	72.5
46.75	47.75	56.75	23.5	62.5	52.5	25	43	34	20	17	66.25
56	50	50.25	21	51	45.75	28.75	48.5	37.25	24	24	72
55.25	51	49	36.5	58	52.5	33	53.5	45.5	33.25	31.5	76
54	50	43.75	44.75	56	42.25	31.25	52.25	47.75	33.5	29	71
64.75	45.5	53.5	28.5	62.75	41.75	26.25	48	38.25	31.25	22.25	68.75
61.75	46.25	52.75	13.25	71.5	36.25	13.5	49.75	36.25	29.25	22.5	71.75
65.25	66	68.25	32	39.5	30	19.25	69.25	51.5	40.5	44	108
63.5	44.25	60.75	25.5	44.25	33	14	74.25	51	45.25	30	89.75
56.5	46	33.5	25.5	69.25	48.5	14.75	49	48.5	25.25	32.25	95.75
59.25	41.25	40.5	57.25	82.5	63.25	23.25	60	52.5	36.25	48.25	131.75
62.5	36.5	27	50	63.5	59	23.25	62	53.75	37.75	57	142.5
60.75	23.5	30.75	25.75	55	50.25	19.25	45	60	28.25	34.25	100.5
40.25	23.75	37	12.75	45.25	28.5	9	34.75	39	24	23.5	91.75
41.5	17.75	27.25	8.25	35.75	27.25	8.5	34.75	42.5	17.75	23.25	72.75
44.5	20.25	30	11.75	39.75	19	15.5	34.5	34.75	18	32	61.25
43.75	38.5	40.5	18.5	58	23.25	14.5	42.25	37	24.75	43	91.5
49.75	20.75	39.25	17	39.75	35	9.5	32	39.25	21	27.25	86.5
36.25	9.5	25.25	10.5	28	17.75	7	43.25	37.25	19	20	61
40.75	33	32.75	25.25	41.25	26.5	14.25	33.5	32.5	20.75	26	72.5
40.25	31	27.5	20.25	28.75	16.5	13.25	19.5	21.25	29.25	23	77.5
30.5	20.5	30.75	18	36.75	12.5	8.75	24.25	15.75	15.75	19.5	64.5
41.25	44	28.25	34.25	30.25	27	22.5	42.25	37	32.5	60	90
31	23.5	40	12.5	31.25	16.25	10.25	20	27.5	15.5	19	57.5
38	29	27.75	14.5	30.75	18.25	7.75	33.5	29.75	14.5	30.25	69.75
25.25	25	20	27.5	33.5	26	15.25	24	20.5	19	24	48
38	24.5	22.75	33	25.75	20.75	16.5	26	29	23.75	35.5	60
41.5	37.5	46	31	37	22.25	16.25	24.75	18.75	25	40.75	78.75
49.5	37.5	54.75	24.25	23.75	29.75	14.75	33.25	23	24	36.5	81.5
33.25	20.75	31.5	15.5	30.75	12	8.75	19.75	21.75	16	21.5	50.75
30	32	30.25	19	10	14.5	13	40.5	29.5	22.25	41	87.25
40.75	36	30	28.25	38.5	21.25	23	20.25	12.5	20.25	31.25	67.5
31	40	24	21.25	22.5	18.5	12	24.25	26	14.5	21.5	46.75
45.5	29.75	38.5	16.75	39.75	15.75	9.5	16.75	17.5	13	35.5	52.75
44.75	11	42.5	12.5	21	14.5	5.25	24.75	20	24	29	77.25
22.75	29.75	27	18.25	27	21.75	19.5	20	19	12.5	27.75	54.5
34.25	35.5	19	22.75	21.5	20.25	18.75	18.25	18.5	17.25	38.25	57
32.75	21.75	35	17.25	21.75	18	14.5	19.75	14.75	13	19.5	46.75
35	26.25	22.25	13.75	29	16.75	13	14.75	10.5	7.25	26.75	61.25
52	38.5	41.5	31.5	40.25	24.75	13.75	29	20.5	26.5	30.75	88.75
41.75	23.5	42	29.75	27.5	27	19	25.75	16.5	11.75	44.75	56
45.75	23.75	32.25	8.75	16.25	17	9.5	29.75	26.25	16.25	35	62.75
39.5	14	32.75	18.75	30.75	15.5	8.5	17.25	22.25	8.75	23.25	57
20.25	23.5	28.25	15.75	18.75	16.5	7	29	25.5	14.75	28.75	65
18	29.5	21.25	16.25	17.5	10.5	8.75	19.5	20.75	19.5	34.25	49.5
40	30	41	19.5	31.5	22.75	10.75	17.25	13.25	14.5	25	55.25
45.75	28.5	26.75	16	29.75	18.75	13.5	19.75	12	14	19.75	45.75
43	23.25	41	23	14.75	17.75	10.5	32.75	24	16.25	34.75	63
50.25	28.5	39.75	27	31.5	25.25	24.5	23.75	23	19.5	31	56.75
41	29	32.75	16.75	19.75	19.5	8.5	38.75	20.25	17.5	46	52
47.25	24	34.75	12.25	21.5	21	12.5	41	19.75	19.25	38.75	68
46.5	31.25	42.25	27.25	39.5	25	15.25	21.25	16.5	22.5	24.75	72.25
45.75	30.75	30.75	25.25	30.75	22.5	17.5	23.5	21.75	19.5	25.75	58.75
32.5	20	36.5	18.5	39.25	17.25	9.75	21.75	23.5	17.5	34.25	52
33.25	8.75	28.5	7.25	15.75	15.25	5.75	21.25	18.75	15.5	30.5	56.25
33.25	25.75	32.25	25.25	26	12	10.75	21.75	20	15.5	25.5	46
26	18.25	27.75	14.75	27.5	11	9	19.5	19	12.5	19.5	32.75
47.5	40.75	41.25	23.5	60	31.25	14.75	48.75	41.5	29.5	40.5	91
59.5	25.25	48.25	30.75	67.25	44.5	7.25	45.25	44.5	32.5	35.75	96.25
34.25	9.5	31.5	4	26.25	10.75	6	16	18.75	10.5	15	45.75
32.25	19.5	29	17.25	35.75	14.5	8.75	36.75	23.5	14	34	52.75
30	28.75	28.75	24.75	31.5	13	17	26.75	15.25	15.5	30	58.75
36	34.5	29	12.5	28.75	23.75	19	27.5	18.75	13	24.75	63.75
37.25	29.75	40.25	18.75	34	15.5	14	17.5	11	14.75	18.5	54.75
49.5	30	39	21.5	37.25	23.5	13.75	33	17.25	19.25	31	82
34	43.25	37	29	29.5	37.75	19.25	22.25	23.25	25.5	43.75	65
36	35.75	33.25	18	26.75	19.5	7.75	29.75	28.75	12.5	24.5	42.5
20.25	16.25	19.75	9	12.75	14	6.75	24.5	22.25	23	34.5	53.25
25.75	20.5	27	8.25	13.75	19.75	5.75	27.75	14.25	17.75	38.25	61.75
42.5	29.5	42.5	15.25	24.75	17.75	19.25	24.25	14.25	22	35.5	67
45.75	23	37.25	14.75	32.25	17.75	17.75	18	19.5	11.5	25.75	53
43.75	37.75	43	23.25	33.25	24	18.25	14.5	19.25	16.25	22.25	55.5
47.25	29	36.25	13.25	17.25	23	11.25	46.25	37.5	22.5	53.5	73
41.75	21.25	27.5	16.5	24.5	21.25	11	24.5	20.75	17.25	34.75	56.25
43.25	23	39.5	20	24.25	19.5	11	22.5	18.25	16.5	22.25	60.25
21.5	24.5	26.25	20.75	21.75	14.5	10.75	18.75	14.25	16.5	24	58.5
40.75	19.75	33.5	6.25	20.5	8	8.5	26	14.25	24.75	36.25	88.5
42.25	22.75	34.25	14.75	36	18.5	14	24.75	11.5	17	34.75	69.5
27.75	19.5	24.25	24.75	36	14	10.5	21.75	16	8.25	16.75	34.25
26	11.75	20	13.25	21.5	8.25	15.75	18.75	12.5	12.75	24.5	44.75
43	42	34.75	31.75	33	25.25	21	23.75	20.75	19	43.5	69
35.75	23	34	30.75	32.5	17.75	14	18.25	16.25	10.75	26.25	53.5
26.5	19.75	27.25	16.25	29	23.25	13.25	14.75	11	11	24	49.25
51.75	27.75	36.5	15.75	27.75	13.5	10.25	28.75	21.5	13.5	24.25	57.25
47.25	29.5	33	23	30.75	20.75	15.25	25.5	20.75	17.75	39	63.5
24.75	16.5	27.25	10.25	19.25	14.75	6.75	28.25	16.5	12.25	33.75	42.25
26.75	32	43.25	23.75	30.25	20.5	9.75	19.5	17.5	12.75	26.25	58.75
34	11.5	30.5	5.75	26	12.25	7	18.25	15	18.25	26.75	64
57.25	15.25	19	1.5	42.5	17.75	6.75	29.75	20.5	11.75	24.75	49.75
30.5	9.75	20.75	4.75	17.75	10.25	8.75	18.25	9.25	9.25	14.25	44.75
36.5	31.5	34.25	23	24.5	21	17.25	22.5	20.25	16.25	25.75	42.5
31	32.75	25	24	15	17	12.25	26	21	12.25	21	45.25
41	31.5	37.75	23.5	33.75	23.5	13	19	7.5	12.25	20	58
34.5	12.5	28.75	9	31.75	12.5	13.5	16.25	8.5	10.5	22	58.5
32.25	24	39	20	30.5	13	11.5	25.75	18.5	11.75	20.5	43.5
53.5	19.5	32.75	11.25	45.75	31	10.75	32.75	30.75	17.75	37.5	69.25
35.5	15	36	19.25	33.75	20.25	11.5	17.25	21	12.75	20.5	62.25
32.5	19.5	28.5	18.5	25.75	11.75	18.75	20	16.75	11.25	28	50
24.5	19.75	19	15.5	9	13	5	38	26	14	35.5	55.25
42.5	25	29.75	23.25	36.25	12.25	13.75	19.25	9.5	16	32.5	58.75
51	29.5	30	25	39.5	28	14.75	25.25	14.25	14.75	31	70.5
48	36.25	47	27	22.5	24	21	32.25	24	20.25	39	62.25
27.5	18	31.5	12	19.25	15	18.75	13.5	13.75	14	28.75	58.75
37.5	28.75	22.75	13.75	20.5	15.5	7.75	16.5	12.75	10	27.5	43.5
44.25	26	45	24	33.25	18.75	13.25	23.25	18	14	38	70.75
42.25	28	27.75	22	32.25	20	15	21.5	15.5	16.25	28.75	51.75
60.75	20.25	30.25	10.75	22.5	17.25	13	31.25	21.25	17.5	25.5	58.5
45	25.75	38.5	14	17.5	19.5	11.25	43.75	33	23.25	54.75	81.75
35	24.5	25.25	27.25	30.5	22.75	17.25	20.75	17.75	12.5	26.5	54.75
47.5	22.5	29	13.25	24.5	14.25	10.25	25.5	16.25	21	39.75	68.5
42	27.75	39.75	25.5	29.25	15.75	18.75	20	18.75	17.25	24	58.75
45.75	25.5	27.25	20.75	23.75	17.75	9	27	15.5	13.75	30.25	49
45	25.75	37.25	16.75	39.75	21.25	9.5	24.75	19.25	12.75	38.25	49.75
42	14	25.25	18	29.25	13.25	8.75	20.5	20.25	14.25	23.75	53
44.25	25.25	31.25	14.25	38.25	20.75	9.25	19.75	17.75	14	26.5	44.75
31	10.25	21.5	2.5	32.25	10	5.5	17.5	14.25	11.5	20.5	51.25
26.5	25.25	32.75	16.5	22	25	10.75	24.75	19.75	9.25	28	39.75
34.25	30.25	33.5	28.5	19.75	17	18.75	30.5	25	23.75	30.25	66.5
38	28.75	40	21.75	27.5	18.5	14	31.25	22.5	17.75	37.25	80.75
43.5	20.25	34.5	14	31.75	16.5	15.5	17	16.25	15.75	21.75	71
43	25.25	40.5	27.25	30	26.75	20.25	27.75	25	19	30	44.5
49.75	35.25	41.25	24.5	31.75	23	21.75	26	18.25	18.25	25.5	57
49.5	19.75	47.75	17.75	28.75	22.75	7	17.75	13.5	17.5	28.5	57.75
41.25	20	31.5	10.5	23	17.5	10	32	19	19	40.5	64
47.75	34.5	35.25	26.25	40	23.25	24.25	22.75	16.25	19.25	37.75	62.5
50.75	37.75	49.25	29	34.25	23	8.75	26	24.5	18.75	34	75.25
29	22.75	24.25	14	11.75	19	12	19.5	19.5	13.5	30.25	42
46	23.5	32	22	30.75	19.75	14.25	19	18.75	22.75	32	58.25
50.75	29.5	39	25.25	32.25	28.25	22.5	17.75	17.25	16.75	27.25	69.75
58	34.5	54	21	32.75	28.25	20.25	33.25	27	22	34.5	74
57.5	25.5	46.25	11.25	17	19	6.5	26.75	20	16.75	28.25	61
46.75	22	26.75	10.5	14.5	15.25	9.25	46	33.75	19.5	43.25	67
39	19.5	31.75	12.5	26.5	16	21.75	28.75	15	20	25.5	56.25
38.5	18.5	46.25	20	29.25	19.5	6.75	31.75	24.5	15.5	29	57.75
34.25	27.25	35.25	31.75	25.75	24.75	17.75	19	17	14	15.75	60.25
22.5	12.25	16	9.25	18.25	19.25	9.25	15.5	12.5	13.75	15.75	29.75
20.75	7	15.25	9.5	24	17.5	8.25	14.25	12.75	16.25	20.5	48.5
37.25	14.5	25.75	7.25	29	12.75	5.25	19	16.5	11.25	24.25	39
26	17	29.25	12.25	25.75	14	14.5	15.5	10.75	12.5	20.5	47.75
39.25	31.5	38.75	35.5	41.5	26.5	20.5	33.5	26.75	21	41.25	82.25
47	30.5	40	18	27	22.75	14.75	20.25	16	13.5	27.5	56
47.75	39	38	26.5	31	22.5	17.5	22.25	20.5	19	32.5	63.5
28.75	21.5	27.25	17.5	9.5	14.5	5.75	36	22	23.25	45.5	66
34.25	22.25	30.5	16.5	27.5	14.5	13.25	27.5	24	12.5	24.5	46.5
46.25	33.5	37	25.25	39	20.75	19	11.75	15.5	16.75	26.75	68.5
44.75	34.5	29.5	18	26.5	20.25	15.75	24.5	19	15.75	31.5	53
40.75	26.5	25.75	20.75	13.25	14.75	10	27	29.25	24	36.5	56.5
41.5	36.5	38.25	25.25	25.75	22.5	19.75	24.5	24	16.5	25.75	51.5
61.25	17.5	38.25	13.25	33.25	16	10.25	25.25	18.5	24.25	30	77.25
48	21.25	33.5	15.5	18.25	19	11.5	28.75	17.5	18.75	36.75	66.75
29.75	21	21.25	16.5	15.5	15.25	12.25	27	22.25	16.75	30.75	58
31.5	25	37.25	20.5	31.5	18.5	17.75	17	17	16.25	31.75	61
37	16.25	26.75	11.5	20.75	13.25	10.75	17.25	12	11.75	24	51.5
49.25	28.75	40	27.25	36.5	17.25	16	25.25	21	15.5	36.25	70.5
55.25	31.5	40.25	23	32.25	18	13.5	21.75	18.5	18.25	34.75	59.5
33.75	26	34	20.25	36.5	25.25	10.75	20	16.25	13.75	26.5	66.5
52.25	27.75	28.5	20	30.75	23.25	18.75	23.5	17.25	16	30.75	62
49.75	38.25	49	16.5	32.75	22.25	17	24.25	23.75	22.5	30.75	61.5
43	53.25	41.75	13.75	23.25	17.75	11.25	26.25	28	15.25	30	47.75
34.5	30	38.75	9	13.5	16.75	7.5	36.25	19.5	19.75	52	69.75
34.25	16.75	24.75	7	16.5	12.25	12.25	25.5	23.25	11.5	38	52.5
16	12.75	12.75	14.5	26	21.5	9.25	10	13.75	10.5	24	46.75
40	24.75	30	14	22.5	21.25	11.5	15	19.75	13.75	33.5	49.25
52.75	33	40.25	12	72	27.75	13	31	33	21.25	30	69.75
43.25	10.75	26.5	6	39	25.25	6.75	14.75	13.25	10.25	22.5	60.25
24.75	15.25	24.5	7.5	27	8	13.5	13.75	13.5	11.25	17.25	35.5
36.5	38.25	20.25	22	28.25	22	10.25	31.25	17.5	15	44.75	61.75
47.5	21	30.5	17.75	34.75	16.5	11	23.5	17.75	13.75	40.25	62
29.5	30.5	26.25	12.5	18.75	13	10	28	25.5	18.75	46.5	69.75
44	30.75	35.5	17	36.75	14.25	16.5	22.25	14	19.5	23	70
34.5	29.75	24.75	22.5	21.5	25.5	15	16.75	21.25	18	18.5	35.25
30.5	21.25	36.5	12.25	20.25	20.25	13.25	16.75	23.25	13	21	55.75
39	26.75	40	22.75	31.5	19.25	16.5	14.25	14	22	29.5	66.25
36.25	21.5	21.25	13.5	23.75	14.5	8	17.5	13	16.5	20.5	48.25
36	29	25.75	18.25	20	18	13	21	13.75	13	29.5	51.25
27.5	22.75	32	21.75	17.5	17.5	10.25	23	27	19.5	32	66.25
28.25	30	25.75	24.25	20.5	18	10.75	19.25	14	15.25	24	44.25
53.75	21.5	39.25	18.25	32.25	14.5	7.25	18	10.75	14.75	28.25	65
39.5	33.5	40.75	29.5	21.75	29.75	19	18.25	19	19	32.5	61.75
47.5	28	34.5	16	28.25	18.75	18.25	29.75	21.25	18.5	33	64
54.75	25.5	25.5	8.5	39.75	12.5	9.5	19.25	19.25	10	27.5	44.5
44.75	10.25	21.5	4.75	31.75	12	3.5	21	23	8	24.5	62.25
28.25	16.25	27.5	5.75	25.25	9	8.75	25	17.5	13.75	18	43.25
28	13.5	19	8.5	27.5	14.25	9	24	20.5	7.75	29.5	49.25
38.75	29	30.5	16.75	33.25	12	14	14.75	10.75	13.75	19	57.25
44.25	33	34.5	34.75	20.75	20.25	17	29	23.75	24.75	41.75	65.25
42.25	33.75	31.75	26	36.75	25.25	16.5	16.25	12.75	16.25	23.75	57.5
50.5	32.25	50.75	23.75	26.25	29	14.75	17.75	22.25	15.75	36	64.5
45.5	29.25	42.75	23.25	33.5	17.5	19.25	24.75	16.5	16.5	31.25	65.5
23.75	31.75	30.25	24.25	21.5	20.25	12.75	20.5	18.25	12.5	30.25	51.75
39.25	27.25	28.5	19.5	27	15.25	12.5	12.75	11.75	17.25	30.5	59.25
48	29	31.25	19.5	21	19.75	13	21.5	14.75	18	32.75	68.75
46.75	26.25	32.5	15.25	31.25	22	12.25	21	20.25	14.75	29.75	74.25
18.25	31.5	33.5	27	19.5	12.75	17.25	15.5	15.25	21.5	23.5	57.25
31.25	25.5	31.25	20.25	9.5	14.25	16.5	12.75	19	11.5	27.75	47.75
37.75	19	23.25	12.25	20.5	17.5	7.25	16	16.25	10.5	23.75	44.5
44.25	24.75	35.75	19.5	28.75	22.25	18.25	22.25	14.25	23.5	35	77.75
42	36.75	45.25	22.75	16.75	23.25	11.75	13	18.25	13	27.5	42
31.5	18	28.5	12	22.75	13.5	11.25	25.5	24.25	12.25	30.5	65
52.75	27	38	21.75	27.75	23.75	14.5	18.25	16.5	13.25	29	54.5
32.25	18.5	25.75	9	21	19	16.75	21.25	12	8	26	35.5
56.5	30.5	40.25	30.5	25.75	15.5	13.5	32	19.5	21.75	44.25	72.75
44.25	18	34.5	13.75	24.75	16.5	12.25	17.25	14.75	11.75	24.5	52.25
52.25	36	40.25	21	33.5	23.5	21	28.25	19	20.25	30	55.75
54	31	39.25	27	38.5	31.25	26.25	25.5	21	20.25	26.75	69.75
39.25	18.5	25.75	8.75	20.25	17.25	8.25	29	23.75	16.25	27	63
65.75	37.25	54.5	32.5	23.75	38.75	18.5	34	27	21.5	37.5	68.75
37.75	10.75	36	6	22.75	8.5	5.5	21.25	18.75	13.5	29.75	60
44.5	9.25	27	9.25	25	14	11.25	19.5	12.25	12.25	19	54.5
46.75	17.25	34.5	6.75	26.5	14.75	7.75	19	17.75	14.25	19.5	41.25
26	15	21.25	12	27.75	13.5	5	18.25	10.75	10	13.75	54.5
40.75	15.25	18.5	7.75	32.25	12.75	11.5	17.75	11	11.75	22.5	46.25
45.5	25.25	34.5	12.25	30.5	18.25	10	32.75	19	14.75	43.75	49.5
57.75	17	31.25	7	24.25	25.5	7	30.75	23	16.25	34	63.5
24.5	13	12	4	34.5	12.25	7.75	17	16.75	10.75	14.25	43.25
29	26	22.5	13.25	56.5	18.25	13.25	24.75	23.25	14	30.25	64
32.25	24.5	26	19.75	45.75	21.75	13.75	26.25	30	16.5	20.25	72.75
44.25	12.5	30	13.25	42.5	9.5	7	26.5	13.75	13.25	25	82
45.25	31	25.75	8.5	43.5	17.5	12.75	21.25	20.25	19.25	25.75	55.25
32.25	18.25	33.5	14	40.75	24	9	32.75	32	13.25	21.75	58
28.5	9.25	31.75	5.75	26	10.25	10	29.25	14	9.25	33.25	43.75
28.25	35	37.25	23	33.25	15.25	16	29.5	23.25	24.5	38.5	66.5
41.5	44.75	41.25	34.25	28.25	32.5	19.5	30.75	32.75	26.25	37.25	71
45.5	32	39.75	18.25	28	37.5	23.75	22	14.75	20.25	27.25	62.25
40.75	18.5	34.75	11.75	32.25	22.25	8.25	21.75	18.5	10.75	21.25	55.25
46	25.75	53.25	21.5	41.75	22	13.25	24.25	20.25	17.75	35.25	83
37.25	23.5	31.25	20	19.5	19.25	15.25	33.5	20.5	16	34.5	54.5
41.5	20.25	32	19.75	26.5	16.75	16	22.75	19.75	16.75	22.5	56.75
38.5	27	31.5	24	19.75	22.25	11	29.25	15.25	21.25	35.75	77.5
26.5	34.25	30.75	31.5	34	32.25	29.75	18.25	11.75	20.5	40	57.5
28.75	35	33.25	26	32.5	19.25	13	24.5	13.75	14.75	25.5	71.25
48.25	24.25	25	25.25	14.5	15.5	9.5	26.5	23.25	18	42.5	64.5
19.25	16	13.25	10.25	17.25	11.75	10	18.75	18	11.75	21	37.5
38.5	26.5	34.5	15	43.75	19.75	11	22.75	25.5	12.25	24.25	40.25
30.25	7.25	30.5	7.5	22.75	10	12.75	17.75	11.75	15.5	18.5	51.25
25.25	18.5	25.5	19.25	39.75	21	16.25	17.75	11	15.75	23	57.25
56.75	33.75	32.25	6.5	32.25	18.75	12	21	14.75	13.75	30	70.25
33.75	30.25	26.5	21.25	34.25	21.5	16	18.25	18.25	13.5	31.5	51.25
36.25	26.75	33.75	21	29.25	21	23.75	23.75	20.5	14.5	21.25	49.25
60.75	25.5	46.75	11	52.75	32.5	12	31.25	33.5	16.5	29	69.75
28.75	11.25	25.5	8.25	31.5	13.75	4.25	17.5	22.75	9.75	16	46.25
46.5	24.5	48.75	28	29	23.25	12.25	34.5	24	24.5	42.75	68.5
23.5	21.75	29.75	10.75	29.25	11	11.5	19.25	13.75	10.75	20.75	52.75
41.25	29.75	26.75	17.25	37.75	22	18.25	20.25	16.5	17.75	25.75	65.75
35.5	33	39	14.75	17	18.75	8.25	28.5	27	13.75	25.5	52
34	19.75	35	23.75	37	21.5	9.5	14	11	13	24.5	53.75
13.5	18.75	21	15	20	18.25	15.75	18.5	14.5	14.25	29.75	57.25
43.75	26.75	23.25	5.75	18.5	17.5	5.25	32.5	23.75	10.75	27.5	50.75
37.5	37.25	40.25	31	28.75	24	17.25	19	15.25	13.5	22.75	51.5
54	21.25	38.5	14.75	22.75	20.75	20.5	18.5	11.75	12	26.75	62.5
24	13.5	16.5	9	25	16.75	5.75	16.75	19.75	14.75	23.5	38.5
21.75	18.25	25	13	7.75	7.75	8	33.5	20.5	19	43.75	49.25
30	11.75	23.25	7.75	21.5	16.75	13.25	16.25	11	11.75	31.25	42.5
37.25	29.75	35.5	29.75	25	22.25	9.75	18.75	17.25	15	25.25	49.25
52.25	37	46	24.25	37.75	29.25	10.75	18.75	15.5	17.25	40.5	72.25
42.5	30.25	30.75	29	32	23.75	18.75	16.25	15.25	13.25	20.25	49.5
30.25	21.5	21.5	8	25	18.5	8.25	20.25	12	9	25.25	41.75
51.25	32	36.75	19.25	31	23.25	22.5	27	19.25	15.25	31	64.5
37.25	20.75	23.25	15.5	19.75	16	4.75	16.5	19	13.5	16.5	52.25
68.75	34.25	55.5	24	36.75	18.25	18.5	41	29	21.25	35.5	87.5
42.25	36.25	39.5	21	26.75	23.5	16.5	25.75	22.5	16.25	27	53.25
32.5	17.75	29.25	14.25	17.5	13.25	10	28.25	23.25	18.75	36.5	59.75
31.75	21	27	20.25	21.5	16.75	10.5	20.75	17	11	22	46
37	13.25	26.75	7.5	45.25	20.25	7	24.5	21.75	17.75	36	71
32	6.75	32.25	7.75	32.5	14	7	19	17.5	13.75	22.75	55.5
32.25	13.25	27.25	9.25	42.75	10.5	8.75	13.5	11.25	9	10.25	42.75
56.5	34.25	44	22.5	63	41.5	16.75	35.75	35.5	22.25	32.75	80.25
37	13.75	31	8.25	35	13.25	6.5	22.5	15.75	14.25	10.25	54
28.75	15.75	26	9.5	16.25	9.25	9.5	30.25	26	14.75	34	52.25
33.5	26.25	33.75	10.75	33.5	20	11.5	27.75	17.5	15.5	37	64.5
46.75	37	28.75	20	43.25	27.75	17.25	20	15.5	14.5	26.5	64.75
32.5	15.75	30.75	18.25	34.75	18.75	7.25	21.5	20.75	14	20	48
23	26.75	31.5	16.25	18.75	14.5	8	25	20.75	11.5	21.5	53.75
23.5	27.25	31.5	23.75	27.5	19.5	19	20	13.5	13.5	24.25	68.25
37.5	29.5	31	21.75	20	18.5	16.25	21.5	26	20.75	46.5	70.5
58	41	49	28.75	41	30.5	17.75	24.5	21	21.25	34	83
50	26.25	38.25	24.5	22.5	21.25	16.25	26	20.25	16.25	24.25	56.25
35	19	21.25	6	17.75	13.75	6	19.25	13.5	11.75	22.75	46.25
27	27.75	31.5	29	26.5	43.5	18.5	17.75	16.5	21	33	61.5
45.25	15	34.5	14	23.75	12.75	5.5	17	13	22.75	28	74.5
21.5	23.75	17	7.75	25	11.25	7.5	21.5	11.75	9.25	27.75	38
36.25	17.5	28.25	23.5	20	14.75	12	19	14.25	16	28.25	44
40.25	22.25	30.25	21.25	26.5	19.5	10.25	18	19.5	19.5	32	60.25
39.25	17.25	27.5	12.25	18.75	14.25	7.75	24.5	14.25	17.5	39.75	64.5
48.25	19.25	34.75	12.25	31.5	18.75	16	12	9.25	12.5	27.25	58
45.5	40.75	51	27.25	34.75	25	26.75	22	21.5	20.75	34.5	75.5
69	36.5	55.75	29.75	43.5	28.75	18	30.75	24.75	20.5	44.5	82.25
37.25	15.5	30	9	18	16.75	12	37	19.75	13	49.25	59
24	15.25	24	7.25	13.5	12.75	11.75	29.75	16.75	11	22.25	42
24.5	26.75	25.5	25	15.75	19.5	8	12.75	17.25	16.5	21.5	43.25
28.75	18	27	12.75	22.5	15.5	13.5	16	8.5	12.5	28.25	52.5
26.5	40	29.25	20.75	15.25	18.25	13.75	16	15.25	10.25	18.25	56.25
31	19.5	42.75	17.5	20.5	18.25	11.25	16.5	8.75	13.75	28	37.75
31.25	30.5	32	20.75	18.5	22.75	12.75	35.25	17.25	22.75	46.25	66.25
47	17.75	28	6.25	19.75	13.5	6.75	21.5	7.5	17.5	32	70.75
53	27.25	50.5	19.75	44.25	20.75	17	20.25	18.25	14.5	28	71.75
36.25	21.5	26.25	15.75	21.75	17.25	9	24.5	23	12.75	28	58.25
41.25	23.75	36.25	17.75	28.5	21.25	14.25	19.5	13.25	13.25	19	52.75
49.25	24.75	36.25	22.25	22.75	25	14.25	30.5	26.25	18.75	34.5	64.25
60.5	39.5	66.75	24.5	42.5	29	26.5	25	22.25	18	27.5	75.5
46.25	15.5	35.5	13	27.75	16.75	10	23.25	14	14.75	34.5	60.25
54	8.5	33.75	5.75	22.75	18.75	11.5	25.75	15.5	16.5	24.5	60.5
26.25	11	28.25	14.5	24.25	12	11.25	14.25	9.5	12.5	18.5	50.5
42	11.5	26	5.75	18.25	11.75	15	13.25	9	11.25	18.5	45.5
51	24.5	35.25	11.5	31.25	20	12	25.25	15.25	15	38.75	61
40.5	14.5	24.25	13.75	18.5	20.25	12	25.25	22	15.25	32	49.5
25	17.75	14.25	12.5	23.75	15.75	9.75	14.75	10.25	10.25	20	42.25
44.5	38.75	26.25	13.75	57.75	28.25	20.5	24.5	22.75	13.75	29	54.5
56.25	32.5	31.25	19.5	60.5	37	13.25	34.25	33.25	23.25	48	83.25
31	11.75	26.5	8.25	17.75	11.75	5	23.25	15.75	6.75	30	57
29	15	18.5	5.75	43.25	12.5	5.5	26	24.5	18	22	42.5
45.75	25.5	38.25	15.5	55.75	32	9.25	38.75	31.5	20.25	32.25	73.25
23	17.75	26.25	16.5	33	17.75	5.5	24	14	7.75	19	48.75
20.25	26.25	32.25	21.25	35.25	10.25	16.75	22.25	13.75	19	22.25	55.75
40.25	36.75	27	11.75	15.75	18.25	10.75	39.5	22.5	14	40.5	71.5
49.25	30	25.5	10.25	39	17.25	6.5	28.5	13.25	17	25.5	72.75
34.75	30.5	38.25	32.75	37.25	29.75	24.5	27.75	20	25.25	39.25	69
26.25	29.25	27.75	19	20.5	21.75	20.25	19.5	17.75	12.25	27.75	50
49.5	17.5	34	8.25	21.75	13.5	8.25	26.75	21.5	12.5	30	52.5
46.5	46.25	56.5	42	45.5	32.5	16.25	22.5	24.25	26.25	35.75	91.25
42.75	18.25	33.75	20	13	15	15.25	30.75	17	16.25	35.75	63.5
26.5	17.75	22.25	11.5	24.25	15.5	10.5	23.5	13.5	13.75	20.25	49
21.25	16	22.5	25	25.75	21.5	14.75	20.75	14.75	15	27.5	54.5
37.75	39	35.25	32	26.25	20	21.25	23.5	19.25	17	27.25	60.5
43	29.75	42.75	22	19.25	21	13.75	18.75	19.5	17.75	26.75	51
27.25	16.5	24.5	12.75	22.25	11.75	9.5	19.25	15.75	12.25	18	54.75
21.5	19.25	19.5	12	26.5	14.75	15.5	10.75	10.25	11.75	22	45.5
51	14.75	25.5	13.5	19	14.25	11.25	29.5	14.75	17.5	41.5	79.5
49.5	35.75	54.25	27	35.25	22.25	14.25	26.75	14.75	19.75	43.75	70.5
37.5	33	31	20.75	32.5	24.75	15.25	15.75	15.25	15.5	28.25	57.25
39.25	25.25	40.5	23.75	28.25	17.5	16.25	21.75	18	18.5	32	62
23.5	23.25	31.25	18	23.75	23.25	14	20.5	25.25	20.75	29.75	55.25
21.75	20.75	28.25	20	18.5	11.75	15.5	16.75	14.25	9.75	16	43.25
24	31.25	36	18.5	26.75	18.5	18.25	9	8.5	10.5	21.75	45.75
31	13.75	20.75	9	28.25	15.25	7	20	9.75	15.75	22.75	52.25
15.75	7.75	15.5	11.25	21	18.25	7.75	12.5	5.5	11.5	12	39
23	17	13.25	13.25	10.5	9.75	8	26.5	21	17.75	27	48.75
50	22.5	29.5	16.5	35.5	17.25	15.5	19	13	12.5	30.5	62.75
45.5	31	34.75	22.5	26.5	19.25	7.75	17.25	12.5	9.5	19.25	56
27.75	14	31	11.75	17.75	17.25	9.5	11.75	7.5	9	16.75	43.5
29.5	16.25	20.5	13.75	34.5	18	15.5	13.75	10.5	13.75	15.25	35.5
34.75	19	28.75	10.5	30	17.5	5.25	23.5	15.75	9.75	29.25	44.25
43.25	20.75	37	15.75	20	11	8	29.5	17.75	19.5	31	78
32.5	16	22.5	10.75	29.5	20	12	13.5	9.5	10	17	42.25
35.5	32.75	29.5	25.75	32.25	15.25	18.25	17.75	15	16.5	35.75	54.75
35.5	26	29.25	22.75	30.25	15	22.75	14.75	13.25	17.75	39	50
36.5	28.25	48.25	24.25	32.25	26	9.5	19.25	14	15.75	23.75	63.5
44.25	26	32.5	18.25	29.75	15	11.5	18.75	15	14.5	33	65
54.75	24	30.5	22.25	35	19	19.5	24.5	17.5	14.5	49.75	72.5
48	28.75	31	21.25	8.25	22.25	6.75	25	24.25	19.5	33.25	56
58.75	28.25	42	16.5	21.75	16.75	13	45	22	26.5	58	81.5
48.25	16.75	39.25	12.5	31.25	16.5	14.75	21.75	14	18.75	35.25	76.75
39.75	30	27.5	16.25	26.25	22	13.5	27.5	15.5	15	35.75	52
49	31.5	36.25	11.5	19.5	22.75	10.25	38.25	25	14.75	32.25	56.5
40	27	39	22	28.25	25.25	16	24.5	22.75	15.25	31	62.25
22.75	27.25	28.25	16.5	25.75	12	19.75	17	9	16.25	15.25	44.5
23.75	26.75	21.5	25	24.25	16	15	17.25	12	19.75	28.75	59
32	29.25	27.25	22.25	32.25	16.25	13	19.25	14.75	13.25	31	48.5
39.25	32	51.75	29.25	39.75	25.75	18	15.5	8.25	13.5	25.75	62.25
66.25	17.5	41.25	10.75	32	18	11.5	24.25	13.5	14.75	35	79.75
49	24.75	34.75	13.5	25.5	17.75	12.75	23.5	20	13.25	25	52
32.25	25	32	12.75	22.75	15	9.25	26.5	27.25	17.75	26.5	50
48	18	37.5	8.25	31.5	21	8	25.5	21.5	12.25	15.5	45.25
57	12.75	31	13.5	33.5	17.25	6.25	18.25	16.75	8	11.5	52
19.5	7.25	20.5	19.75	21.5	9.5	4.75	18	11	10	10	51.25
14.25	4.25	12.75	6.25	30.75	13.75	9.25	7.25	12.25	13.5	18.25	47.25
12.5	10.75	18.5	7.75	24.25	6	16.5	20	8	12	17.25	43.75
23.5	25.25	21.25	8.5	31.5	8	19	20.5	16.5	17.75	36	57.25
48.25	25.5	32.5	17	49.75	26	13.75	23	19.5	15.75	31.5	59.5
36	15.25	22.5	18.25	35.75	16.75	12	21	16.5	14.75	15.5	43
45.75	26.25	26.75	31.25	49.25	19.25	17.5	15.25	13.5	21.25	30.25	49.75
28.5	24.75	30.5	15.25	27	19.5	13.5	30.75	18.5	20	43.75	57.75
41.25	36	37.25	27	31.25	29.25	21.5	28.25	19.25	16.5	43.75	80.25
40.25	25.75	36	19.5	35.75	21.5	14.75	17.25	11.5	12	18.5	51
39.5	26.75	35.75	22.5	17	18.25	8.75	28.25	21.75	20	29	60.5
43.5	16.5	30.75	12.5	28.5	12.25	10.25	26.25	13.75	19.75	21.75	63.75
21.5	14.25	18.5	9.25	18	7.75	9	20	15.75	18.75	26.75	54
54.75	27.25	43.5	28.5	30.25	23.5	14.75	20.75	16	16.25	33.75	68.75
34.5	21.5	24.5	20.25	31.75	13	9	14	6.75	12	15.5	51
44.5	32.25	35.25	23.5	28.25	22.75	16	17.75	13	17.75	28.5	59.25
36	24.25	36.5	23.75	24.25	20.5	15	18	13.25	12	25	60.75
27.5	20.5	19.75	16	17.25	14	12.25	21.5	19.75	15.75	25.5	51.75
52.25	36.25	40.5	37.75	25	21.25	23.5	21.75	18.25	22.5	37.75	65.25
55.75	22.25	37.25	14	27.75	15.5	15.25	22.25	13	8.5	23	65.5
46.75	21.5	27.75	11.25	20.75	11.75	11.5	33	26.25	17.5	44.25	58.75
43	25.25	39	19.75	35.75	15.75	20.75	15	11.25	20.5	15.75	60.25
36.5	25.5	39.75	16	30.75	23	19.5	31.5	19.5	19.25	34	68.5
38.75	16.5	21.5	13.5	29	14.5	12	13.75	12	11	25	48.5
35.25	20	38	15	33.25	21	16	20	15.5	11	30	43.25
29.75	27.75	32.5	17.75	24.5	15	11.5	24.75	14.75	15	25.25	54.25
38	17	22.25	13.75	25.25	9.25	10.5	13.25	8	13.25	19.75	49.25
39	29	29	19.75	13	21.5	15	40	22.25	20.25	50.5	57
33.5	28	27.25	13.75	34.5	17.25	14	17.75	12	13	19.75	43.25
29.25	25.25	34.75	17.25	22.25	15.75	13.5	19.75	13.25	13.5	21.75	43.75
25.25	18.75	23.5	12.5	24.25	13	11.25	16.25	12.25	17.75	30.5	54.75
39.25	29.25	30.25	28.5	35.75	20.25	15	21.75	14.75	18	37	61
49.5	31	43	21	37.25	24.25	19.75	16	13.25	14	22.25	55.25
34.75	24.5	26.5	19	26.25	15.75	11.75	19	16.25	19	29.5	52
39	23.75	37.25	7.75	14.25	17	6.25	23.25	20.25	14.75	37	58
45.5	19	26.5	9.5	35.75	10.25	15.75	15.75	4.5	16.5	28	56
63.25	22.25	54.75	30.25	29.75	27.25	19.75	26.75	22	24.75	27.25	78.5
49.5	43.75	57.75	32.75	39.25	24.25	25.25	26	17.5	20.5	35.25	80.75
31.5	15.25	21.5	12.25	22.25	12.75	10.5	17.75	12.5	6.75	18.75	35.25
44.5	21	31.25	16	42.25	32.75	11.5	21.75	12.25	11.5	18.5	46.5
49.25	27.75	50.25	18.75	42.25	32.25	12.25	23.25	17	14.75	21.5	61.75
67.75	65.25	71.5	36.5	52.5	58.5	31.25	53.25	49.75	39.5	31.25	90.75
51.25	41.75	56.5	29.5	55.5	55	19	38	37.5	22.25	22.5	62.5
75	68.25	83	71.5	57.75	51.25	31	64	48	43.25	39.5	91.5
42.25	32.75	43.5	22.75	22.75	35.5	8.75	32.25	23.5	20.5	29.75	59.5
61.5	74.5	71.5	36.5	32.25	62	20.5	71.75	44.75	44	47.25	101.5
49.25	46.5	65.5	27.25	27.75	51.25	16.75	56.5	28	29.5	52.25	90.5
55	20.75	45.25	9.5	18.75	34	9.75	36.75	24.75	21.5	28.75	67.25
60.5	52.75	69	28.25	45.25	36.5	26	55.75	37.5	30.75	42.5	80.5
39.25	29.75	35	21	36.5	18	11.75	19.5	15.75	13.75	13.25	39.5
37.75	40.25	48.5	14.75	34.5	21	14.25	26.75	23.5	22.75	16.5	79.25
51.75	63.5	53.25	17.25	57.5	32.75	31	39.75	34.5	21	16.5	67.5
58.75	34.5	37	11.25	25.75	28	10.25	28.75	22.5	14.75	17	60
47.5	46.5	54	11.25	31.5	17	8.25	29.25	22.25	24.75	27.5	61.5
50.25	37.75	42.75	8.75	31.25	31.5	10.5	42.5	24	23.75	35	71
40.5	24.75	26.25	23.25	34.25	24.75	8.75	28	25.5	17	17.75	69
46.75	28	33	17	44.25	33.25	22.5	38	31.75	21.5	23	79.5
34.75	14.25	25	8.75	36.25	17.25	11.5	24.75	24.75	12.5	17.25	62.75
51.25	23	40.25	16	44.75	16.75	8	24.5	30.5	21.25	22	81.75
31	29.5	34	22.75	35.75	12.25	19.5	21.75	14.25	19.75	28	67.5
36.75	33.75	30.25	18.5	19.25	18.75	10	43.25	36.75	24.5	36.5	74
36	33.25	30.25	34	43	23.75	11.25	17.5	16	17.25	22	87
27.75	36.25	38	24.75	38.25	22.5	24.25	23.75	16	19.75	26.25	65.75
26.5	27	18	5.5	10.25	10.5	4.75	29	24.25	12.25	35.25	64.25
54.25	30	37	24.5	29.75	27.75	21.25	22.25	21.75	20	26.5	65
40	23	34.25	19.25	24.5	14.25	9	26.75	23	19.25	15.75	65
32	12.25	28.25	19.75	37	12.5	16.5	23.25	10.25	27	25.25	83
20.5	22.75	23.5	11	9.75	17.75	8	31.25	27	19	37.75	63.25
42.5	35	48	22	25.5	11.75	16.5	37.75	25.5	18.75	35.25	62.75
40.25	47.25	44.25	36.5	38	31.75	23.25	26.25	19.25	21.25	35.75	86
41.25	24	34.5	7.5	25.25	18.75	11.25	17.75	14.75	10.5	16.5	45
41	22	32.75	8.5	15.25	15	6.25	42	30.25	23.25	34.25	73.25
30.5	43.5	37.25	22	34.5	19.25	18.25	24.5	20.75	17	17	67.75
34	19	30.5	15	31.5	20.5	18.25	20.5	12.25	24	18.75	55.75
56.75	18.75	36	14.25	30.25	13.75	6	22.75	21	14.5	20.25	63
48.25	15.25	34.25	6.75	28	14	12	31	15.5	27	29	89
25.75	29.75	22	14.75	15	7.75	14.25	32.75	15.25	11.5	37.5	52.25
29	26.25	42.25	20.75	29.75	18.25	15.75	25.75	17.75	23.25	31.25	54.5
31.5	17.75	31.75	17.5	17	11.25	8.5	18.25	17.75	19.25	26	57
22.75	16	23.5	11.5	26.75	9.5	17	20	5.75	13	18.75	48.25
16.75	18.25	19	14.5	18.5	10.75	9.75	22.5	10	12.75	27	48.25
44.25	39.5	44.5	27.25	33.75	27.25	18.75	22.25	17.25	17.25	26	71.5
49	17.75	42	18.75	29.25	21.75	10.25	22.75	14	19.5	41.5	74.25
23.75	23.5	27.5	17.25	32.5	22	16.75	22	13.75	12.25	28.5	50.75
45.75	28.5	47.25	11.5	17	22.75	10.75	42.75	24.75	19.25	41	62.75
39.25	41	37.25	39.25	22	25.5	22.5	14.5	13.25	29.75	25	69.25
48.25	25.5	39.75	16.25	28.75	20.25	11	27	18	15.75	26	73
40.5	23.5	35.75	5.5	27.5	9.75	8.25	19.75	12.5	13	29.5	53
24.75	19	21.75	4	16	8.5	7.75	14.25	10	8.25	17	37.5
32	18.5	23.5	5.5	28	8.25	16.5	14.25	12	15	25.25	40.75
41.75	17.5	30.75	5.75	29.25	14	9.75	21	18	17.25	28.75	64.25
20.5	14.25	30	14.5	19.25	10.5	13.75	17.25	14.25	13	24.5	47.5
32.5	26	30.25	16.5	16.5	26.25	10.25	34.75	29	29.75	46.75	70.75
53.5	36	40.75	23.75	38	23.5	16.5	23.25	10.75	12.75	30.5	76.5
41.5	32.75	41.5	23	26	18.5	23	23.5	15.75	20.5	32.75	53.25
41	26.25	38	19	16.25	17	12.5	28	21	21.25	41.75	53.25
36	13.5	24.25	15.5	24.25	24.75	15	24.75	20.5	15.5	26.25	53.5
34.75	18.75	37.25	13	38.75	18.75	5.5	16.75	16.5	10	11.5	49
33.5	26.25	45.25	23	38.25	18	7.5	17.75	9.75	15.75	34.25	68
27	22.75	27.75	20.25	23.25	13	16	26	9.75	19.5	31.5	59
29.25	20.5	20.25	14.5	24	9.75	14.75	16.25	6.5	11.25	23.25	50
30.75	20	38	10.5	18.75	8.75	7.5	21	13.75	15.75	13.25	60
24	14.25	29.5	9.75	15.5	13.5	16.75	17.75	9.25	9.75	13.25	43
35	35.5	31.75	28.25	29	24.5	26.5	14.25	10.75	18	25.5	58
43	37.25	31.5	19	26.5	20	9	27	17.25	20.5	35.75	64.5
27.25	18.25	25	11.25	21.5	17	9	21	21	16.25	26	57
62.25	30	48.75	13.5	35.25	16	13.25	21.75	14.25	17	26	68
32.25	46.5	35.5	24.5	31.25	22	25	24.75	17.5	18.75	35.25	63
68	36.75	54.5	30.25	27.75	33.5	32	26.5	18.25	18.75	24.5	66.5
34	28	37	29	26.25	16.75	16.5	15.25	12.5	13.75	20.75	67.5
24	18.5	16.25	14.5	8.75	11	6	17.5	18.75	14	25	49.5
31	30.25	30.5	21.25	12	14.75	8.25	14.75	14.75	11.5	26	40
34.5	23	35.25	14.5	21.25	15.25	9.25	10.25	13.75	16.75	18.5	58.25
34.75	25.25	32.5	16.75	22.5	16	7	25.5	10.25	15.5	37.5	56.5
39.25	25	39.5	28.75	21.5	14.75	17.5	17	12.25	13.25	23	55
54.75	27.5	38.25	22.5	40.25	17.5	19	16.25	14	18.5	25	67.5
44.25	32.5	36.75	21.75	20.5	11.5	13.5	33.75	29	19.75	33.75	62
54.5	29	46	26.25	29.5	21.75	15.5	20.5	10.5	13.5	20	53.75
38.75	19.5	25.5	8.25	18.75	11.5	11.75	24	12	13.75	23.5	50.75
48.5	20.5	37.25	9.25	25.75	22.25	12.75	31.5	21	15.25	35.5	60
51.75	18.75	41.25	10.5	35.75	14.75	18.5	28.25	20	22	38.75	71
42.75	37.25	46.5	21.25	37.25	29.75	20.75	24.25	30	23.75	29.5	87.75
50.75	12.25	39	12.25	19.75	19.75	6.25	15.75	18	8.25	10	32.5
15.25	3.5	17.5	2.5	19.25	15	10.5	11.5	10.25	10.75	9.75	42.25
13	6.75	16.25	6	30	5.75	7.5	14	13.75	23.75	17.75	70.25
15.75	14.75	32.25	4	26.75	8.5	18	19.25	16.75	14	15	46.75
27.25	14.75	25.75	4.75	29.5	11.5	16.5	18.5	9.25	13	17.5	45.5
23	30	28.25	7.5	29.75	10.75	18.75	25.75	23	19.5	30	57.75
24.25	34.25	27.75	19.25	17.5	12	21	23.5	21	23	36.5	67.25
26.25	22.5	39.5	18.25	33.25	15.75	12.75	17	17	12.25	27.75	59.25
25.75	20.25	31.75	19.25	31.25	14.75	13.25	11	9.75	12	17.5	47.5
33.75	23.75	22.5	8	28.25	15.25	9.25	12	8.25	8	19	38
31.75	19.75	28.25	6.5	28	11.5	11	18.25	12.5	7.25	19	33.75
30	38.75	44	25.25	20.5	25	12.25	19.25	20	18.25	25.75	65
24.75	26.75	33.25	24.5	30	12.75	21.75	12	7.25	16.75	21.75	50
38.25	16.5	31.25	7.75	21.25	15.25	9.25	21.25	12.25	16.25	29.5	42.75
52.5	28.75	38.5	13.25	47.5	18.75	8.75	29.25	30.5	24	27.5	57.5
24.5	7.25	22.75	2.5	26	11.5	7.25	11.75	16.5	11.25	8	57.5
24.5	11.75	19.75	9	28.25	13	17.75	20.25	7.75	11	14.75	39.5
41.75	32	31.25	18.75	30.5	23.5	15.5	27.25	24.25	22.5	39.5	74
31.75	36.5	43	35	33.25	23.75	32.25	13.5	9.5	23.5	33.75	78.25
42.75	24	40.75	19.25	26.75	14	15.25	21	12.25	15	24.25	46.25
19	46.5	28.25	28.75	28.5	17	21	23.5	25.25	19.25	27.75	58
30.75	27.25	26.5	33	23.25	16.75	16.25	23.75	25	24.75	35.5	57.5
49.25	24	42	16.75	32.5	19.5	8	14.5	7.25	10.25	16.75	62.75
33.5	28.25	36	21	34.5	27.75	20.75	17.75	7.5	17.75	24.25	46
32.5	20.25	24.5	8.25	16.75	11.25	9.75	32.75	19.5	15.75	49	51.75
55	32.25	47	18.25	23.25	22.5	17.25	30	21.75	18.25	32	66.25
43.75	50	49.5	27.75	32.25	29	18	29.25	20.75	28.25	37	85.75
39	36.75	30.75	31.75	23.75	20.75	17	26.5	18	20	26.5	51.5
40.5	38.5	34.5	15.75	18.5	13.75	7	26.75	17	17	35.25	53.25
30.5	25.5	26.5	14.25	25.75	18.5	17	20.5	12.75	18.25	27.75	50.5
29.25	21.25	24.75	11.75	33.75	16.5	10.5	20.25	15.25	16.25	22.25	52
26.75	18.25	31	12.5	25.5	17	6.25	19.5	6	9.75	12.25	46.75
33.5	27.5	36.25	18.5	33.25	22.25	12.5	20.75	11.25	16	20.25	68
28.25	18.5	24.5	9	28.75	7.25	14.75	17.25	11	9.75	17.25	42.75
42.75	16.5	39	13	60	28.75	12	24.25	33.5	18.5	28.25	65.25
43	12.25	30.75	12.75	36	18.75	6.25	28.25	24.25	19	22	61.5
23	14.75	29.75	13	30.5	12	19.25	12.75	7.75	11.75	19.5	47
25.75	14	22.75	9.75	17.75	13.25	13.5	23	16	14	22.25	47
27.5	31	32.25	18	13.75	9.5	7.5	36.5	19	17	45.75	57.25
33.25	18.75	30.75	11.5	22.25	11	12	29.25	13.25	15.5	29.75	59.25
46.75	40.5	52.5	31.25	32.25	21	15.5	18.25	14.5	19.25	31.5	82
44.25	44.5	43.25	24.75	20.5	32.25	23.5	21	22.75	17.5	33.25	56.75
21.75	20.25	20.25	14.75	12.75	11.5	10	34	15.5	22.75	34.5	61.75
35.25	22	43	17.5	43	18.25	19.5	11.5	7.75	11.25	17	55.25
27.75	18.75	23	11.5	12.25	15.5	9	24	22	11	24.75	48
43.25	32.5	43.25	34.75	27	23	24.25	19.5	15.5	19	27.5	54
45.5	25.25	40.75	18.5	36	15	17.25	18	14.25	14	22.25	53
51.75	19	38.5	11	29.75	20.75	10	21.75	15	28	33	69.25
53	25.5	47	12	23.5	16.75	11.25	27.25	17	19.5	26	59
41.5	29.25	34	30.75	26.25	22.25	29.75	28	21.75	22.75	25.75	64.75
48.5	29.25	53.75	18.75	39.5	26.5	23.5	33	18	24.5	44.5	77.75
35	27.25	24.5	18.25	15.25	16.25	11	35.25	13.25	22	51.25	68.75
49.25	18.75	37.5	21	21.25	17	13.75	25	23.5	20.75	28.75	51.75
25.5	20.25	24.75	14.5	25.5	14.25	14.5	12.25	11.25	19.75	16	61.5
43.75	15.5	41	4.75	16.5	15	7	33.25	16.25	16.25	20.5	67.75
39	20	41	9.5	15.75	26.75	11.75	26.5	14	16.5	15	50
37.75	22	49.5	15.25	41.5	25.5	13.5	25	23.5	17.25	22	57
34.5	18.5	26	10.5	43.5	20	16.25	20	19.75	13.5	18.5	53.75
46.25	34.75	38.5	30.25	58.5	37.25	16.5	32.5	38	31	40.5	92.25
56.25	43	52.5	48.5	69	50.75	20.25	47.75	48.25	40.5	47.25	110.75
36.25	30.25	39.25	26	43	26	9	31.5	30.75	26	30.5	82.5
42.25	40.25	39.5	43	64.25	33	14.25	37.75	38	22.75	36.5	89
56.75	61.75	89	70.75	72.75	51.5	39.25	54.25	51.75	50.75	69.5	115.25
58.75	38.25	58	72.75	70.75	43	37	48.75	52	42	54	128
48.5	40.75	59	65.25	65.25	47.5	25.75	62.75	55.75	53.5	49.25	142.75
57	43	70.5	41.5	55.75	56.75	21	61.25	54.5	45	56.5	146.75
60.5	21	63.75	28	55.25	47.5	15.5	52.5	52.25	38.5	46.25	117
43.25	14.25	26.25	11.75	38.5	28.75	7.5	38	46.75	19.75	19.25	77
34.75	19.25	28.75	9.25	41	15.5	6.5	24.5	30	14	17.75	55.5
41.75	14.5	44.75	11.5	31	19.75	8.5	36.5	33.5	14.75	29	80
50.5	21.25	35.5	12	38.75	27.5	8.75	30.75	19.5	16.25	26.5	73.75
32.5	23	19	17.75	21.25	18.25	7.5	21.75	24.75	15.5	21.5	56.25
44	36	32.5	31.25	37.25	26	18.5	20.25	18.5	23.25	24.5	68
33.25	22.75	41.25	16.5	10.25	16	4.5	35.75	23.75	26.5	41.5	75
26	18.75	26.25	25.5	39.25	22.25	18	21.25	19.75	18.25	18.5	55
44	27.25	25.25	20.75	30.75	20.75	15	27.25	15.5	20.25	33.75	75
37.75	28.5	45	29.25	29.25	26.25	18.75	29.5	35	24.25	32.5	72.75
30.5	19.75	36	17.5	23.5	14.25	5.5	26.25	24.5	15	23.25	71
25.75	23	28.25	13.25	15.5	11.5	7.25	28.75	16.75	19.25	33.75	52.5
23.5	20.75	28.5	20.75	37.5	9.75	21	11.25	14.25	14.75	16	48.25
22.5	46.25	30	27.25	34.25	27.5	23.5	15.5	19.25	17.5	23.75	54.25
31.75	15	21.25	9.5	14.75	18.25	5.25	23	12	12	24	52.75
42.5	20	46	19.5	35.25	15.25	20	22.75	17.5	16	25.75	62.75
31.25	17.25	30.75	24	25	18.25	6.5	20.25	22.75	12	20.25	56.25
34.5	14.5	31.75	14	19.75	13.5	7.5	20.25	9.75	19.75	26	72.75
28.25	20.25	36	18.25	28.25	20.25	20	23.25	17.25	14.75	41.25	45.75
48	41.75	51.25	34.25	24	36.75	14.75	30	19.5	22	36.75	72.5
23	12.75	32	9.25	14.5	10.25	6	24.25	17.75	13.5	20.75	57.5
34.25	28	33	17.75	27.25	26.5	10	17	15.75	8.75	23.5	52.25
48.5	11.75	32	9.75	34.75	15.75	12.25	18.5	12	15	27.5	63
46.25	25.25	47.75	19.25	40.75	23.75	16.25	24	15.25	22.25	35	77.5
36.25	40.25	33.75	31	30	20.75	16.75	14.75	14.5	19.25	24.25	57.25
34.75	18.75	29.25	11.25	26.5	14.25	10.25	33	16	18.25	30.75	69
21.75	31.5	31	25	23	19.25	20.75	27.25	15.25	18.75	35.5	62.5
18	7.5	17.75	3.25	17.75	6.5	3.75	18.5	17	11.5	30.5	43
47.5	19.75	47	16.75	24.25	20.25	6.75	18	12	21	30.75	71
33	29	35.75	14.5	34	21.25	17	16.75	10.25	13.25	23.5	59.25
35	26.75	32.75	21.5	29.5	15	13.25	24	24.25	16.5	32	57.5
33.25	12.5	39.5	11.75	14.25	20.75	9	22	14.5	13.75	24.25	70.25
46	34.5	44.25	25	28.75	28	25.5	18	17.25	18.75	31.75	50
43.25	25	40.5	24	42.75	31.25	15.75	17.5	11.5	21	25.25	61.5
61.25	36.75	46.25	37.25	41.75	28.25	20	38	22.5	25	39.5	89.5
44	23.25	29	18.25	17.25	16	16.5	23.75	12.75	15.5	29.5	60.5
30.5	22.75	30	11	18.75	15	5	30.25	24.25	13.75	27.25	50.75
53	31.25	30.75	22.5	20.25	28.75	15.75	19.75	16.75	17.5	20.25	53.5
43.25	16	31.5	9.5	18.25	21.25	8.5	27.5	16.75	19	40.25	59.75
36.75	6.5	33	14.25	41.25	11.5	5.25	15	14	8.25	15	60.5
30.75	12.5	27	18.5	23.75	11.5	5.75	17.25	8	12.25	19	54.25
33.25	15.5	21.25	9.25	23.25	13.25	13.5	22.25	16.25	14.25	19.5	53
22	33.25	27.75	12.5	27.25	11.5	16.25	20.25	10.5	14.5	32.25	62.5
30.25	28.5	36.75	26	23.5	20.75	25.25	28.75	13.25	21	34	57.25
34.25	36.5	45.75	21.5	26	22.5	22	24.5	12.75	16.75	28.5	73.5
54.25	16.25	34.25	11.25	30	27.5	8.5	25.25	13	20.75	37	96.5
29.75	24.5	23.25	20.25	17	17.75	10.75	27	22.75	18.75	26.25	41.5
15	20.5	25	21.5	21.25	17.75	7	21	11.75	9.75	18.25	43
40	29.5	30.25	22.5	41.5	25.25	23	22.5	14	20.5	36	71.5
31.75	27	27.25	22.25	10.75	20.75	10.75	34	26.5	26.75	36	75
44	24.25	45.5	9.25	26.75	15.5	15.25	20.5	15.25	12.5	24.5	53.75
46.75	28.75	42.25	24	39.25	22.75	18	20.25	17	22.75	35.25	76.5
42.75	24.75	46.5	23.5	35.75	20.5	17	22.25	22	16.25	25.75	75.25
43.25	42.5	54	25.75	19.75	33.75	17.5	31.5	25	15.25	35	61.75
22	20.5	20.75	12	13.25	9	8.25	26.5	17	11.75	35.25	46.25
32.5	11	26.5	11.25	21.75	7	10.25	14	7.75	17.5	22.5	56
25.25	29.25	23.5	17.5	28.25	14.25	11.25	17	12.25	14.75	22.5	51.5
51.75	25	53.25	21	35	28.75	14.75	19.5	18	19.25	29.5	72.75
52.75	29.25	47.5	19	39.75	20	25.5	21.75	14.75	17	28.25	59.25
44.25	26.5	38.75	17	28.5	18.5	20.5	30.5	24.5	20.25	28.5	69
41.75	17.25	30	16.75	28	8.5	16.5	23.5	12.75	12.75	23.5	51
60.25	27	50	16	24.75	22.5	13.75	48.5	38.5	30.5	57.75	81.25
30.75	25.5	44	4.75	24.25	18.5	7.25	32.25	27	18.5	33.75	60.25
73.25	49.25	77.25	42	71.25	52.25	25	45.75	32	27.5	23.5	70.25
53.75	41.5	56.75	17.5	66.5	49.5	30.25	38	25.75	20.75	18.75	68
61.25	58.25	62.5	21.5	52.25	60.5	33.25	51.25	31.5	32.75	26	90.25
76.5	55	91.75	24.75	48	38.25	27.25	77	53.75	45.25	65.75	104.5
61.5	49.75	62.5	22	44.25	39.25	13	49.25	27.75	24.5	25.25	72
34.5	31.25	39.5	9.75	29	20.75	4.5	29.5	24	18.25	20.5	54.5
47.5	37.75	57	6.75	33.25	26	4.25	33.75	16.5	14.5	26.75	53.25
60	42.75	56.5	41.5	37.75	36.5	11	54.75	47	38	43	84.75
62.75	57.75	74.25	50.5	62.75	62.5	30.75	53.25	37.5	38.5	27.75	93
52.25	66.75	64.75	37.5	59	57.25	34	45.75	33.5	36	29.25	94.75
60.5	57.25	62.75	30	56.75	54.75	21.75	50	41.25	27	24.25	88.5
55.5	49.25	57	26.5	50.25	46.75	25	38.75	28.25	31.25	18.25	69.25
79.75	55.25	67.5	35.5	50	43.25	19.25	47.75	39.75	37.25	25.5	84.25
53	62	67.25	36	35	38.5	14.75	60	42.25	43.75	43.5	86
80.75	55.25	100.25	59	49	57.75	20	81	59	54.5	58.25	127.5
77.5	52	84	44.25	57.75	48.75	15.25	53.25	42	54	39.25	100.25
72.5	49.75	56	42.75	32.25	51.75	17.75	49.5	35.25	36.75	31.25	84.25
54.25	22.5	29.5	20.75	50.5	33.25	10	25.5	34.25	15.75	19.25	80
28.25	15	19.5	7.25	38.25	24	6.5	27.75	19.5	17.25	18	79
34.75	40.25	52.75	27	44.5	19.25	10.25	35	18.75	24	29.75	81.25
50.5	37.5	50	20.5	40.75	31	17.75	36.75	37	20	24.75	76
37.25	32	42.75	22.5	41.25	20.25	10.5	31.5	26.75	22.75	35.5	71.5
35.25	48.25	51.5	29.75	36.5	28.5	15.5	36.75	26.25	32.75	36	84.75
63.25	65.25	72.25	50.75	42.25	62.75	16	73.25	63.5	55.75	53.75	102.75
39	46.25	50.5	32.25	28	53.25	12.5	49.25	44	33.25	32.25	90
48.5	51.25	46.75	24.75	20.5	45	14	36.25	26.75	27	27.25	65.5
41.5	46	68.5	38.25	49.5	48.75	33.5	40.25	31.75	35.25	24.75	81
46.75	40.5	54.5	34.5	32	24.25	9.25	44.25	28	21	28.5	67
50.75	67.5	78	28.5	53.5	45	23	37.5	33.75	37.75	21.25	78.5
43.25	59.75	42.75	23.25	49.75	42.75	23	39.25	25	29.25	23.5	75.25
74.25	47	106.25	25.5	71.75	43.25	29	73.25	53.75	44	54	108.5
54.75	56.75	60.75	19.5	60	63.25	30.5	59	39.75	40.75	36	97
49	71.25	53.5	17.5	44.75	38	22	40.5	30.75	25	37	82
51.25	39.75	53.25	23	32.75	38.5	12.25	33.75	25.25	26.75	16.5	73.5
55.5	45.75	61.5	29.75	44.5	41.75	38.5	42.75	38	29.25	27.5	71.5
62.25	50.75	71.5	22.75	53.75	43.75	28	47	38.5	34.75	22	82.25
63.5	62.25	74	36.75	57.5	62.75	28	62.5	38.25	47.5	36.75	99.25
90.75	53	84	44.25	51	54	34.25	65.5	41.25	62.5	48.5	105.75
54	42.25	56.75	36.75	45.25	51.5	16.5	46.25	39	34.25	25.25	89
69.25	45.25	50.25	52.25	67.5	51.5	31.25	42.5	54.5	38.25	42.75	126.75
48.75	16.25	28.5	12.75	44.25	17.5	10	31	33.5	29	20.5	94.75
40.75	10.5	30	9	37	15.75	8	33	28.75	18	26.25	66.75
31.75	17.25	30.75	16	29.25	13.5	18	27	22.5	24.25	26	69
37.75	13.75	21.5	11.5	30.25	16	10.5	30.75	29.5	23.5	36	70.5
31	15.75	29	14	31.25	12	16.25	23.25	14.75	16.75	17.75	56
39.75	21.5	32	11.25	28.25	14.25	11	20.25	24	18.75	18.75	73.25
39.5	20.25	38	26.5	42.25	25	18	14	15.25	17.25	22.25	73.75
29	29.5	35.75	27.75	32.75	23.25	13.75	25.25	21.25	24.25	32.25	78.5
38	16.75	22.5	9.75	16.25	8.25	4.75	33.25	16.75	27.25	49.5	100.5
31	20	33	14.5	39.5	12.75	18	22.5	11.5	15.5	18.25	61.5
23.5	27.5	42.75	21	31.75	24	16.5	26.25	24	25	28.25	55
27.5	13.25	31.25	16.25	34	17.5	13	21	22	13	12.75	58.5
26.25	17	30	10.25	8	6.75	6	34.25	26.75	16.75	25.75	54
30.5	40.25	44	21.5	17.5	28.5	20.25	28.5	21	23.25	35.5	62.75
31.75	11.25	20.75	4.25	32.25	8.75	9.25	13.75	15.25	14	13.5	49.75
28	14	18.5	2.5	32.5	13	4.75	19.5	20.5	17	15.75	55.75
29.25	14.5	23	7.25	36.75	10	7.5	28	27.5	20	16.25	65.5
26	16	30.75	9.5	30.5	12.25	8	28	22.5	12	21	44.75
27.25	16	28	7.5	22	13.75	14.5	24	19.5	17.75	18	45
40.25	28	39	19.5	31.75	18.25	21.5	40.5	20.25	31.25	42	93
40.25	53.5	52.5	30	28.75	22	14	39	31	31.25	40	90
32.75	28.5	38.5	21	37.5	16.25	21.25	23.75	11.5	17	24.75	59.25
35	32.25	44	32.25	40.5	21.25	20.75	33.75	26.75	24.5	37	96.25
47.75	38	43	29.75	37.75	48	24.75	33.25	20.75	30.75	53.75	96.5
31.75	23.75	25.25	15	17.75	14.5	9.5	36.75	19.5	19.75	34	60.5
37.25	24.5	38.75	13.75	13.5	14.75	6.5	38.75	17.75	17.5	40.75	55
55.75	27.75	42.75	18.25	25	16	17.25	22.25	15.25	28.5	25	79.5
33.5	28.75	36	22.75	30.25	16.75	8.5	26.5	12.25	19.75	36	85.25
27.5	25.5	25	23.5	15.5	21.5	13.25	22.5	14.5	14.5	35.75	57.5
37.75	27	39.75	30.5	28.25	19	13.5	25.5	19.25	20.75	30	61.75
41.5	15.75	20	12.5	21.25	13.5	13	15	10.25	15.75	37	54.5
18.25	10.75	19	8.25	18.5	9.25	13	17	9	12.25	21.75	45.5
49.25	30.25	44.5	21	43	24.5	23.5	17.75	12.75	23	32.5	74.75
45.25	31.25	39.75	18.5	19.5	25	13.25	35.75	28.75	38.25	58.25	96.5
25.75	25.25	31.5	8.75	9.5	14.75	6	27.75	19.5	11.75	32.5	49.25
33.75	38.75	34.75	20	34.25	10.5	17	15	10	13	22.5	54.75
34.75	16.75	33.75	14.5	31.25	15.75	11.75	19.5	14.25	17.25	23.75	59.5
35	15	34.5	14.75	24	13.25	4.25	17.5	18.25	14	22	60.25
24.5	36.25	35.5	30.5	18.25	14.5	15	27.5	23.75	21.75	26.25	53.75
45.5	24.75	31.5	8.5	40	13	11.5	40	31.5	29.25	36	74.75
34.75	14	27.5	8.5	34.25	11.75	4.75	27.5	25.25	14	13.75	73.75
47.25	21	31	14.75	41	15	6.5	18.75	13.75	19.5	24.25	75.5
23.75	16.25	25.75	11.5	21.25	8.5	17.25	17.75	11	19.25	14.5	43.75
33	34.75	32.75	22.25	13.5	21	12.25	28	21.75	17.75	27.75	52
38	24.25	37	17.5	30.5	18.5	21.75	18.5	14.5	21.25	25.75	74
34	17	22.25	2.75	28.75	6.75	2.25	13.25	17	15.5	14.25	59
25	12.25	29.25	1.5	32.25	7.5	3.5	20.25	15.5	15.25	10	62.5
24.25	19.25	34.75	1.5	26.5	14.25	6	22.5	16	13	14.25	53.75
33	28.75	30.75	14.5	33	17	3.5	33	30.75	24.25	22.75	72
29.25	16	25.25	5.5	23	9.25	2.5	30.5	26.75	21.75	14.25	66
30.25	18	26.25	5.25	28.75	9.25	5	25.75	26.25	19.5	14.5	64.25
19.25	10.75	25.25	4.5	17.5	9.5	5.75	28	26.25	12.75	15.5	53
23.5	14	25.75	2.75	27.75	7	6	32	23	13	18.5	56
33.25	16	30.5	5	22.75	10	1.5	24.75	26	20.75	16.75	68.5
25.5	11	24.75	2.5	26.5	6.5	2.75	24.5	24.75	18	18.5	55
21.5	11.75	27.25	1	18.75	9.75	8.75	15.75	23.75	17.75	33.25	62
26.75	16.25	23.25	9.75	22.5	11	8.25	32.5	27	20	17.25	66.5
30.75	22.25	30.25	2	28.5	9.75	9.75	23.5	25	13.75	16.25	67.25
21	20.25	36.25	4.75	29	17.75	16.25	17.5	24	17.75	22.75	66.75
23.75	17.75	27.25	5.25	32.25	9	8	15	13.75	12.75	11	49
22.25	11.75	24.75	5.5	16.25	8	12.75	21.75	23.75	17.25	19.5	46.75
37.5	20.75	27.75	4	32.75	11.5	10.25	30.75	27.25	21.25	25.75	64.75
18.75	11.5	24.25	3.5	18.5	9.75	5	19.75	16.5	13.75	14.5	45.5
18	14.25	32.5	4.75	22.75	11	11.75	22	18.5	13.5	15	51.5
37.5	19.5	31.25	6.25	28	11.75	12.75	24.5	24.5	15	22.25	55.25
45.5	24.25	28.25	20.75	43.25	20.5	12.25	31	36	27.75	20.25	82
70.25	45.75	48	68.5	63.25	64.25	28	69.75	69.25	56.5	56.5	159.5
78.5	17	18	22.25	41	28.5	7.75	43	48.25	26.25	23.5	94.5
85.5	12.75	29.25	19	49.25	18	3.75	33.5	40.5	24.5	23	104.75
88.25	23.25	39.75	48.5	60	45.25	16.25	49.25	68.75	44.25	47	138.5
68	54	68.75	55.25	56.25	73.75	32.5	67	66.75	52	66.5	148.25
88.25	65.5	102	54.75	68	62.5	32.5	85	73.75	70.25	74.5	181.75
71.75	99.25	69.25	54.75	73.25	40.75	24	98.75	79.75	56.25	95.25	170.75
74	65	56	33	71.75	44.75	22	84.5	70	53.25	88	165.75
66	67.5	89.5	62.75	61.5	59	24	71.25	68.75	60.5	77	142.5
49.5	70	104.25	63	69.25	37.25	29	90.5	71	60.5	76.25	166
60.5	66	73.75	45.75	61.75	47.75	27.25	86.5	69.75	58	60.75	159.75
62.25	64	73.75	48.5	69.5	36	25.5	79.5	71.25	57.75	67	147.75
54.5	75.75	69.75	49.75	75.5	46.5	21.25	78.75	59.75	51.25	68	145.5
65.75	81.5	60.5	37.25	69	50.75	22.75	80	60.5	56.25	71	151
70.75	38.5	64	42.75	62.75	47	19.75	84.25	61.75	57	82.5	164.5
78.5	52.25	71.5	51	63.5	51	22.5	73.25	63	53.25	85.25	159.5
78.75	41	66	42.75	61.5	38	21.5	78.5	62.5	57.5	82	163.5
79.25	40.75	62.75	42.75	60	35	16.25	73	65.75	52	96	158.5
80.5	36.25	50.25	29.75	68	36.5	16.75	79.25	66.25	56.5	85.25	167.5
84	40	60.25	27.25	48.75	36	18.75	85	56.25	59.5	77.75	168
64.75	61.5	80.25	47.25	73.75	42.5	22.75	85	54.75	60.25	61.25	169.5
48.75	38.75	50	30.75	42	29.5	11.5	51.25	49.75	36	47.5	106.5
36.5	24	43.25	19.25	30	19	7.5	38.25	33.75	23.75	32	72
35.5	17.25	42.25	15.75	35.5	13.5	7.5	32.75	26.75	13.75	25.75	67.25
36	20.25	42.25	22.75	22.25	19.75	10	34	27.75	22.25	26.25	88.25
27.25	29.75	43.75	20.75	29.75	15.75	16.5	23.75	20.5	24.25	24.25	77.5
34.5	13	47.75	12.25	31.25	18.25	4.5	32.75	25.5	20.5	21.25	81.5
31.5	18.5	39.75	16.25	23.5	20	7.75	26.25	24.75	17.25	20.75	76.75
28.5	22.75	47	15.25	31.25	20.25	13.25	25.25	17.25	23.5	30	74.75
46.5	29.5	57.75	32.25	56.5	31	12.75	44	42.75	41	45	120
39	18.75	42.5	42.75	36.25	20	8.25	49.75	45	33.75	36.25	111
26.5	17.25	45.5	32.25	35.5	11.5	7	35.25	25.75	21.25	29.5	85.25
28	11.25	49.75	23.75	29.75	17.5	9.25	28.25	24	20.5	34.5	91
21.25	14	32.25	17	19.75	17	15.5	22.5	17.25	23.75	25.5	94
34.75	12.75	45	27	35.25	26	9.25	36.5	34.25	22	36.25	102.5
24.75	11	44.5	24.25	29.25	19.75	9.75	27.5	22	19.5	27	86.25
29.25	19.5	47.25	31	23.75	23	20.75	22.75	24.5	24	23	79.75
43.25	25.25	48.5	41.75	53.75	27.25	12	48.75	40	32.5	46.5	104.5
52	33.25	55	50.25	42.5	33.25	14.25	56	46	40.25	54.5	129
62	44.25	55.75	60.75	66.5	38.5	11	66.5	70.5	53	61.5	156
72.75	51.25	70	44	69.25	50	16	68.5	71.5	49	60	150.5
34.75	29.75	51.25	14	39	31.75	13	41.5	26.75	21	36.75	89.5
32.5	34.75	46.5	15.25	41.5	25.25	10.75	22	25	18.25	25.25	75.75
29	28.5	41.25	16.25	34	27.5	10	33	26.25	22.5	35	89
51.75	33.5	45.25	31.5	45	26.5	13.25	38.25	30.5	22.25	32.75	83.25
44	22.25	49	16.5	39.5	24	9.25	32.75	35.75	27.25	33	102
39	42.5	45.25	36.25	30.75	26.25	20.25	32.5	25.75	28.75	29	86.25
27.25	24.5	43.25	19.5	33.5	20.5	13	32.5	20.25	21.75	26.25	87.25
34.25	40	43.75	26.25	38.75	21.5	24	34.25	24.5	22	33	70.75
30	35.25	40	22.25	40.5	19.25	15.5	28.75	17.5	16.25	28.25	77.75
34.75	21	29	18.5	29.75	26.25	15.5	27.25	20.5	30	26.75	88
41.5	19.25	33.75	9	36.5	15.75	9.75	25	16	19.75	30	72.5
21.25	18.5	29.75	10.75	24.25	14.25	12.75	25.25	17.75	13.5	33	62.75
34.25	27	39.25	22.25	33.25	14	14.5	33.5	18.25	18.75	35.25	69
36.25	44.75	32	26	38	22	17.5	29.75	24.25	24.5	41.5	78.25
27	19.25	35	10.75	38	12.5	9	25.5	18.25	11.5	22.75	63.5
40.75	30	38.25	26.5	17.25	34.75	14.25	41	31.5	25.25	49.25	77.5
50	22	49.75	16.25	27.5	18	15.5	25.25	16.25	16.25	31	69.5
29.75	45.75	41.25	39	35	22.25	23.5	27	21.5	24.75	29.75	71
19.5	27.5	31.25	30.5	29	29	24.75	20	11.75	21.75	23.25	61
41.25	30.75	30.25	18	17.75	13.75	10.75	36.75	29.25	21.5	40	72.25
48.75	25	38.5	14.75	40.25	23	5.5	23.75	19.75	20.5	24.25	63.25
31.75	20	25	9.75	28.25	18.5	5.5	23	19	17.25	23.25	52.25
26.5	23.25	40.5	11.75	18.5	24	11.5	36.25	19.75	16.75	51.75	68.25
31.25	31.75	33.5	26.75	40.75	25.5	18.75	26.75	14.75	11.25	28	62.5
35.75	48.75	47.5	29.5	31.5	16	20.25	26.5	16	23.75	36.25	70
30.25	14.75	27.75	11	17	14.25	5.5	38.25	18.5	23.25	26.5	77.75
44.75	27.25	45	23	23.5	18.75	13	28.75	25.75	16	22.75	65.25
32.5	30.75	31.75	21.75	32.75	16.5	13	24.5	15.75	13.5	30.25	67.75
37.75	31.75	32.5	26.75	31	23	17.25	31.75	15.25	22.25	34.25	67
29	31.75	38.25	16	22.25	23.5	14.75	21.75	21.75	14	35	69.5
19.25	26.25	30	24	24.25	16.25	19.5	26	13.75	22.25	30.75	59.5
28.25	31.25	42	26	23	19.25	14.5	23.25	14.75	17.75	39.75	75
30.5	17.25	34	6.25	14.5	12.25	7.75	18.25	15.25	15.5	33.5	46.5
58.5	37.75	50.5	25.75	36.5	31	22	32.25	22	23.5	42.75	81.25
40.25	43.5	31	26.25	22.5	21.25	25.25	24.25	18.5	14.5	25.25	60.25
31.75	24	34.5	19.25	25.5	14.25	16	27.5	18	16.5	25	67
22.75	28	31.25	22.75	11	14.25	12.25	19.75	22.5	14.5	19.5	44.5
26	23.5	23.75	19.5	19.5	12.5	5.5	16.25	14	15.75	23.75	52
35	29	34.5	14.5	41.5	13.75	22.75	18.25	6	16.25	25.75	62.75
35.5	25.75	36.25	18.25	28.5	17.5	15.25	22.5	16.75	33.75	46.75	78.25
23.5	32.75	37.25	26.25	25	15.5	13	19.5	16.5	18.25	32.75	49.5
45.5	19.75	39.5	12.5	31.25	10.75	9.5	24.5	16	18.75	32.75	71
28.5	10.5	36.25	10.75	21.25	6.25	13.25	15.75	10.75	24.75	15.25	63.5
37.5	36	32	27.5	24.25	17	16.75	27.75	18.5	18.5	19	54.25
42	27	39.25	22.5	37.5	22	18.5	18.25	19.25	17.25	41	59.75
37.25	32.75	30.75	26.5	30.25	17.75	15	26.25	15.75	19.5	28	72
54.25	40.75	41.25	21.75	23.5	28.75	18.25	33.5	24	26.75	45.5	69.5
56.5	53.5	46.25	42.5	23.5	26.25	20	35.25	25.75	28.25	39.75	77.5
46.25	33.5	37.25	19.25	37.75	22.5	20.25	20.75	14.75	14.5	26	59.75
46.75	25.5	36.75	21.75	28	16.75	20.25	32.5	19.5	21.75	43.5	68.25
28.75	26.75	44.5	20.5	31.75	20.5	11.75	26.25	6.75	13.75	21.75	73.25
25	25.5	23.5	25	21.5	10.25	15.75	18.75	13.5	13.5	34.75	44.25
32.5	17.5	26.5	11	22.75	9.5	12.5	23.5	14.25	10.5	26.75	50.25
26.5	26.5	28.25	31.75	32.75	10	22.75	15.75	13.75	18.5	34.75	63.75
30	32.75	35	21	16.75	24.25	17.25	21	20.25	24.25	28.75	60.25
33.75	25.5	33	10.25	26	12.75	13.75	23	7.75	10	20.25	61.25
45.5	30.75	41	14	27.75	18.25	13.5	17.75	12.25	13	27.5	49.5
25	24.5	37.25	26.5	28	15	12.5	19.5	10.5	14.75	26.25	54.5
34.75	20.75	25	12.5	23.5	9.5	11	23.25	6.25	14	35.25	61.75
29	28.5	39	30	17.25	22.25	11	22.75	17	14	31.25	51.75
49.5	19.5	36.25	15.25	23.5	15.5	13.75	25.5	16.25	15	30	81
38.25	26.75	40.25	19.25	33.75	21.75	23.5	20	12.75	22.75	32	56.75
54.25	37.5	45.75	32.75	28	38.25	19.75	33.25	17.75	23.75	44	68.75
33.25	19.5	25.5	14.25	26.75	14.75	10.5	29.25	15.5	16.25	30.25	58.75
33.5	21.25	29	20.5	33.25	13.75	15.75	12.25	10.5	13.75	32.5	60.5
22.25	25.25	28	21.5	19	16.25	10.25	12.5	11.5	11	34	46.5
30.5	27.75	21.75	11.75	15	13	8.75	30.25	20.5	17	33.25	49.5
37.5	34.5	34	20.25	30.5	22	15	20	15.25	15.5	34.5	62
31.25	23	27.25	11	31.5	9.25	18	15.5	18.25	21	33.75	60.75
34.25	22.25	35	17.25	23.75	28.25	15.25	28.25	18.75	15.5	44.25	58.75
43	26.5	36.5	19.25	57.25	32.5	8.5	23.5	19.25	19.75	26	58.25
27.25	32	36.25	19.5	43	21	18.5	22.75	21	16.25	27.75	60
32.25	26.25	35.75	24.25	40.25	14.25	24.75	23.25	13.25	18.25	33.75	54.25
32.5	31.5	29	20.75	21.75	14.5	12.75	31.75	29.25	18.5	32.5	68.75
38.75	32.5	37.75	18.5	35	20.25	20.25	19.5	10.75	15.25	39	56.75
37.5	27.75	41.5	34.25	20.75	14.75	8.5	33.25	18	18	36.75	69.5
40.25	35.25	41.5	16	34.5	18.75	13.5	26	17.5	19	54	68.75
22.25	29.75	51.25	26.75	23.5	18	17.5	19.5	16.25	16	28.5	58.25
23.25	30.5	28	27.75	25.75	17	16.75	19.5	12	14.25	30.5	52
52.5	27.75	34.75	21	39.25	20.5	13.25	23	13.5	16.5	26	67.25
42.75	36	44.5	35.5	27.5	28.5	37.5	16	17.25	14.25	30	59.25
49.75	34	30.75	20.75	17	21.5	9.5	43	30.25	25.25	55	66.25
58	26.5	47.25	13.25	27	16.5	16.25	31.25	16	16.5	33.25	63
53.25	35	45.75	26.5	35.25	22.5	27.75	28.5	19.25	32	43	68.75
49.25	35.25	48.25	36.25	42.75	25.5	14	37.25	18.5	26.25	39.25	92.25
56.5	27.75	36.25	14.5	31.75	19.75	9.25	24.75	14.25	12.5	29.25	49.25
41.75	36.25	26.75	20.5	22.5	19	23	32.25	27.75	23.5	50.25	65.25
59.5	20.25	47.25	14.75	35.75	16.75	15.75	34	16.75	17	40.75	74
57.25	41	49	31.75	30.75	33.5	20	28.75	23.5	25.75	31	72.5
32.5	24.5	39.25	8.25	14.5	11.5	13.25	25.25	18.75	13.75	18	42.5
30.75	27.75	32.25	19.75	22	15.5	19.5	20.25	13	20	22	65
44.5	22.25	31.75	21.25	11.75	18.5	12.5	28.75	24.25	18.25	31.75	70.75
38.25	33.75	45.25	12.75	17.25	16.5	8.75	33.25	34	23.25	40.25	80
45.75	28.5	49	22	43.5	19	21	23	14.75	18.25	18.75	64.5
57.75	36.5	57.75	25.25	61.5	28.75	10.75	46	32.25	28.75	41.5	77.25
34	51.5	29.25	19.75	17.75	23.5	5.5	41.25	39	22.5	27	56.75
45.75	56	57.25	10	24.25	28.75	8.5	54.75	35.75	25.5	44.75	70.5
35.5	19.75	28	9.5	34.5	19.5	6.75	22.5	20.25	14.5	20.5	47.75
50.25	43.5	35.75	36.75	61	46.5	26	44.5	39.25	32.75	34.25	94
69.75	54.5	53.25	38.25	71.25	52.75	28.75	87	66.5	47.5	55	130
61.75	35.75	48.75	34.75	45.75	46.25	11.75	74.25	42.25	43.25	28	118.75
37	19.75	38	8.5	37.5	26.75	13.75	40	16.75	15	14.75	65.75
37.75	32.5	50	22.5	31	17.25	24.5	30.5	20.75	23.5	28.25	98.5
36.5	14.5	37.25	30.5	36.5	28	5.75	28	23	16.5	15.5	64.75
39	21	37.75	20.5	36.75	23	9.25	29.25	26.5	17.75	20.75	69.5
30	29.5	39.5	24	42.5	23.75	16.75	19.5	9.75	17	17.75	58.75
24	35.75	24.75	21	14.5	19.75	10.5	33.75	20.75	20.5	54.75	75
43.25	29.75	39	19	22.25	22.5	19.5	44.5	19	21.5	47.25	67
38.5	26.25	36	17.75	27.5	19.5	16	42.5	17.75	17.25	33.25	70
34.5	30.25	29	23.5	41	16.5	15	18	9.75	18.5	41.75	69.5
40.75	44.75	49.5	37.5	36	26.5	15.25	22.5	23.75	18.75	23	76.75
27.5	29.75	29.75	29	16.75	18.5	18.75	19.25	23.25	16.5	32	56
52.5	34.75	31.75	13.25	33.25	12.5	11.75	24.25	14.5	14	37	64.25
37.25	26.75	38.75	31.25	31	14.25	10.75	31.5	18.75	21.5	31.5	82
27.75	28.75	29.25	21.5	30.25	18.75	16	20.75	20.25	13	37.25	52.25
28	29.5	25.25	17.75	31.25	19.5	23.25	22.25	13.25	17.5	22.75	48.5
38	32.5	33.5	17.25	14.75	20.5	10.25	29.5	20.5	19.25	29.75	58.25
59.5	24	53.5	15.5	29.5	15.75	12.25	27.5	15.5	26	35	88.5
37.25	39.25	40.25	28.25	29.25	24.75	14.75	27.5	18.5	22.5	36	66.5
58	34	45.5	19.25	32.5	29	27.75	31	21.25	20.5	48.75	75.5
42.5	29.75	29	12.75	12	19.75	10	33.5	21.25	23.5	40.5	62.5
45.25	19.25	42.75	12.5	31.25	17.5	16	31	14	22	31.25	57
58.75	36.25	45	26.25	37.75	26	19.75	24	19	19.5	32.5	76.25
29	33.5	25.25	20.25	29.5	18	14.5	22.5	20.25	14.5	35.25	78.5
18	30.75	31	24	22.25	12.25	22.5	11.5	9	19	23.25	50
37.25	30.75	24.5	16.75	12.75	17.25	8.5	26	24	19.5	35	67.75
25.25	29.25	29	21.75	27.25	20.25	16	13	7.75	12.75	26.25	45
45.25	38.75	45	20	22.5	22.75	9.5	26	16.75	24.75	46.25	74.75
40.75	22.75	29.5	11.75	33	17	11	16.25	11	11.25	29.25	69.25
46.75	33.25	39.5	32	26.5	19.25	21.5	25	16	17.75	39.5	61
54.25	23.75	42.25	10.5	26.75	17.5	12.75	35	19.5	16.75	35.25	71.5
44.25	27.5	31	17.75	21	19.25	15.5	30.25	26.25	22.5	36	70
50.5	34.5	35	22.5	29.75	28.5	25	36.75	20.25	32.25	38.75	74.75
48	44	42.25	26.5	39.75	28.25	16.5	33.25	23	21.25	36.25	72.5
40.25	19.25	34.25	10.5	25.25	15.75	11.25	31.5	18	16.75	29.5	42.75
43.25	43.75	36	16.5	26	21	25	22.5	15.5	20.75	23	59.5
34.5	20.5	34.5	16	25.25	16.25	13	36.5	26.75	20.5	36.75	82.75
36.5	38	28.25	18.25	29	23.25	10.25	22.25	15.25	12	15	44
36	40.25	39.5	18.5	25.75	29.25	10.5	21.75	15.5	16	19.5	44.25
32	37.75	28.25	21	35.75	28.5	18.75	21.5	15.25	18.25	14.5	59.75
58.75	53	54.25	26	48.75	41	21.75	54.75	39.5	34.25	29.5	81.75
60.5	45.25	46.75	20.75	35.25	39	16	53.5	36.25	33.75	47.5	96.75
41.25	19	38.75	13.5	14.5	18	3.75	33.5	16.5	14.25	28.25	64.75
63.75	32.5	65.75	8	34.75	33.75	8.5	40.25	25.5	25	45.25	80.5
51	55	57.5	25	65.75	45.25	36.25	41.25	34	24.25	27.75	76.25
53.25	69.75	67.25	41.5	45	61	33.25	40.25	36.5	27.25	32.5	65.75
116.75	66.75	75.5	41.25	58.5	65	45	93.5	66.25	60	64	140.25
44.5	60.5	66.75	42	37	81	20.5	60.5	45.75	41	34.5	103.75
51	72.25	58.5	48.75	52.75	54.5	28.75	48	41.25	41.25	40.75	94.75
48.75	63.5	49.5	15.75	66.25	25.25	18	35.5	27.25	26	17.5	63
49.5	64.75	74.5	25.5	66.75	40.75	26	55	46.25	43	40.5	84
47.25	52	49.25	14	51.25	34	25.5	46.5	34.25	35.5	27.25	71
64.75	37.5	37.5	29	53.25	46.25	23	43	39.75	30.25	31	98
43.75	12	30.75	6.25	29.25	29.75	6.25	26.25	20	17.5	14	64.75
36.5	7.25	28.25	7.75	38	24	10.5	31	23	18.25	23.25	56
34	14.25	40	15.25	34	20.5	19.5	31.75	21	17.75	27	66.75
39	17	37.5	16	37	14.75	17.25	26.25	25.25	19	23.75	69.5
53	30.75	40.75	23.5	44.75	22.75	18.75	35.5	29.25	31	28.5	77.75
32.5	18.5	38	7.75	20.25	19.25	10.75	30.75	29	20	22	77.25
40.5	25.5	49.25	14	19	22.25	8.75	39	34.75	22.75	43.75	66.25
29.75	36.75	37.25	19.75	43	15	20.75	30.5	13	18.5	33.75	64.5
51.25	32	26.75	20.5	46.75	24.75	15.5	29.5	15.5	18.25	38.25	94
32	46	46.75	41.5	32.5	24.75	23.75	36	25.75	24	38.5	80
36.5	33.5	29.5	32.25	31.75	31.75	22.25	36.25	27.75	30.75	42.75	75.5
35	29.5	38.25	30	39.5	28	19	38	15.5	20	19.25	69.25
36.25	18	28.75	10.75	26.25	21.25	7	28.75	15.75	13.75	26.25	56.75
34.75	16.25	26.75	9.5	16	13	4.5	35.75	16.25	25.75	31.5	82
29	23	37.5	10.75	26	25.25	6	31.75	21.5	23	45.75	71
36.25	20.75	39.75	4.75	49.5	19.75	9.25	23	33.25	16.5	26.75	59.25
42	26.5	39.25	13	32	16.25	10.25	26	18	28.5	21	74.25
22.25	15.25	28	12.5	40	7.75	16	19.5	9.75	15	21	51.25
37.25	33.25	40.25	39.5	34	18.75	30.25	38.5	22.25	34.5	54	83
30.5	40.75	27.75	27.5	23.25	19.5	13	28.25	20.25	17.25	32.5	66.25
47	43.5	61.25	26	43.75	26.5	19.25	31.25	11.25	21.75	36.75	78.25
29.75	39	41.25	23.25	27.75	20.5	17.75	19.75	11.25	17.5	26.5	58.75
27.25	26.5	27.25	18	21.75	15.75	8	23	13.25	17	25.25	55.75
28.25	37.5	32	22.25	25.25	18	14.25	34.5	27.25	17.75	32.75	58.5
28.25	21.25	21.75	5.25	7.5	18.75	4.5	34.25	15.75	14.75	42.75	54.5
39.5	36.25	45.75	20.5	35	27.75	11	20.5	12.75	20.25	27.25	77.25
49.75	25.75	31	17	28	16	13.75	27.5	14	30	45.75	97.75
27.5	27	20	13.75	23.5	17	10	19	14.5	9.75	30.5	44.5
32.5	31.5	29	26	12.75	15.75	7.75	25.75	26.75	23.25	28.75	48.5
21	23.5	27.5	19	21	7.75	15.5	13	6.25	15	12	42.75
37.5	23	28	19.25	23.5	12.25	8.75	24.5	9	17.5	30.75	62
49.75	35.25	39	16.75	36	23.5	20.25	22.25	10.75	15.25	23.75	63.25
43.75	47.75	38	26.25	22.5	21	16.5	31	26.25	22.75	34.5	59.75
38.75	27.75	36.5	22.25	25.5	16.25	21	26.5	12.75	19.25	26	56.75
52.25	35	37.75	25.5	41	27.5	26.5	29.5	16.75	21.75	39	76.25
53.25	33	43.75	19.25	29.75	18.25	14	34	16.5	21.75	47.75	76.25
41	29.5	35.5	11.5	15.75	17.5	9.25	39.5	19.25	19.5	40.5	63.25
48	31.5	41.75	26.5	39.25	24	19.75	36.25	27	24.75	35.75	76.5
30	25.75	29	9.5	25.25	18.75	11	15.25	11.5	14.25	15.5	51
27.5	18.5	15.75	12	17.5	13.5	7.75	14.5	10.25	12	15.75	52.25
38.5	29.75	37.5	23	32.25	22.5	13.75	16.5	14.75	17	24.5	59.75
16.5	24	21.5	26.5	23.25	27.5	18.75	20	13	21.5	25.5	50.5
42.25	25.5	30.25	20.5	12.75	19.5	8.75	37.25	18.25	20.25	49	61
36	23	31.75	13.5	36.25	14.25	15.5	13	9.75	14.75	19.5	54.5
43.25	43.5	46.25	31.75	34	28.25	19.75	21.25	16.75	19.75	33.25	81
48.25	44.5	40.75	35	35.25	27.25	28.5	29.25	17.5	25.5	26	68.25
60.25	23.25	43.5	15	21.25	27.25	13.5	32.5	16	27.5	37.5	86.25
50	33.75	33.75	20.5	23.25	18.5	16	40.5	27.5	20.5	52.75	75.5
51	36.5	48.5	28.25	34.75	22.5	29.25	29.5	23.25	23.5	38	72
55.5	34.25	47.75	21.25	36	21.25	14.75	25.25	15	19.5	39.25	72.75
34.5	39.5	34.25	21.25	20.5	28	14	25.5	19.75	16.25	28.25	71.5
43.75	25.25	48.5	18.75	20.75	20	11.75	44.75	30.25	23	30	64.75
55.5	32	54.75	16.5	20.75	11.75	12	49.75	27.5	19.25	34.75	67.75
42.5	36.25	43	9.5	21	20	12	46.75	16.75	12.25	33	66
42.5	39.25	48.25	19.25	23	27	14.25	45.75	29.25	25.75	44.25	79.5
51.5	45	55.5	14.75	33.25	46	12.5	60.5	34.75	35.25	78.75	100
69.5	60.75	59.75	28.25	37.25	51.5	28.5	52.25	30.5	39.25	43.75	81
36.5	31.75	46.5	12.75	23	15.5	12	25.25	12.5	21.5	19.75	53
28	29.5	30.75	11	13.75	19.75	9.5	23.75	13.5	19.25	20.75	49.5
38.25	30.75	45	13.75	19.25	27.75	15	30.5	21.75	16.25	32.75	63.5
32.75	19.25	21.25	8.75	21	15	7.75	22.25	14	12.25	24.75	54.5
23	15.75	19	10.75	24.75	12	9	12	15.75	10.75	21	54
22.75	12.25	28.75	7.25	36.5	15	21.75	28	13	19.25	22	61
32	41.75	22	36.75	42	21	19.75	26.75	14.5	27.75	28.25	68
36.75	30	30	13.75	17.25	19.75	7.5	33.5	26	19	48.25	80.25
43.25	21.75	35.25	9.25	34.25	11.5	9.5	24	22	17.25	15.75	71.5
40	16.25	34.25	10	36	12.5	14.75	20.75	14	19.25	18.5	81.75
20.25	22.75	29.5	18.75	31.75	13.25	13.25	26.5	20	19	30	76.5
50.5	44.25	36.75	23.5	38	24.5	19.25	20.25	12.25	22.25	31.75	62.5
39.25	23.5	30.5	12.25	28.5	12.5	9.75	16.5	7.75	16.75	22	63.5
43.75	37.75	27.5	25.5	22.5	18.75	14.5	40.25	25	25.75	38.5	67.25
36.5	25.75	29.25	13.25	18.75	17.25	15.5	21	19.5	12.5	17	48.75
24.25	22	30.5	22.75	20	26.75	20.25	27.25	12.5	21.25	34	67.75
30.5	50	37.75	27.25	31.5	19.75	19.25	20.5	16	14.5	30.5	57.25
26.5	33.75	29.25	22.25	30.25	22.25	22.75	29	15.5	22.75	31	70
29.75	19.75	36.75	15.25	25	10.25	13.5	28.75	15.75	17.5	24.75	63.5
46.25	26.75	32.5	25.25	34.75	25	15.5	26.25	16	22.75	30.75	66.5
48	18	37.25	9	29.5	18.5	11.5	25	20.75	24.75	25	75.25
18.5	25	19.5	5.5	8.5	13	6.25	22.75	29.25	17.5	32.75	55.25
23.75	18.25	23	9.5	10.75	12.75	14	20.5	17	11.25	24.5	45.5
29.5	38.25	32.5	24	25.25	34.25	22.25	36.5	24.75	24	55.75	85.25
51.75	16	34.5	4	27.5	11.25	8.25	20.25	9.25	12.5	28.5	74.25
40.75	55	45.25	33.5	44.75	30.75	19.25	21	14.5	22.75	42	88
36.25	31.25	38.75	26.5	27.25	18	17.75	14.5	11.5	24.5	23.5	64.5
45.75	37	53.5	25	31.25	17.25	13.5	41.25	26.5	26	43.75	92.5
40.75	38.5	39.25	35.5	39.25	31	29.5	25.75	19.5	25.5	27.75	69.25
38.25	20.75	31.25	11.5	17.5	16.75	8.25	28	15	10.75	23	60
25.75	24.25	19.5	6.25	10.25	8.75	7.5	25.75	20.5	23	38	62.25
29.25	33.25	30.25	24.75	21.5	15.5	28.5	14.75	18	18.5	25.5	45.25
23.25	18.25	23.5	16.25	22.25	8.25	8	19.75	15.5	11.5	11.75	50.5
20.25	23	28.5	9.75	27.75	11.25	17.75	21	5.75	13.5	22.5	50.25
40.25	25.5	31.25	15.25	38.25	17.5	19	17.5	9.75	15.5	20.75	68
43.5	35.75	36.5	30.25	22.75	20	13	35.75	18.75	22.75	47.75	72.5
51	31	31.5	22	34	20	21	22.75	17.5	25.25	40.25	88
52.25	32.75	49.25	19.75	23.75	20.5	10	33.75	19.75	23.75	35.5	69.25
38.25	29.75	28.75	23.75	16.75	15.75	16	31.5	26.5	20.5	39	67.5
52.5	24.75	44.25	16	33.5	14.75	15.25	20.5	13.75	16	18.25	51.5
43.5	52.5	39	35.75	37.5	23.5	29.75	28	22	35.25	48.5	86
52	36.5	51.75	23.75	36	20.75	12.25	32.75	22.5	21	38.75	78.5
44.25	29.5	34.75	24.75	29	21	18.75	33.75	22.5	14	32.5	55
43	24	31.75	8.75	23	18.25	8.75	20.5	14.25	16.25	25	50
29.25	20.5	33.75	15.75	15	15.5	16	15	14	14.25	21.5	45
24.75	19.5	36.25	13	21.5	15.25	9	18.25	11.75	12.75	15.25	50.75
23	27.5	35.25	25	14.75	19.25	11.25	16.5	14.5	15.25	22.75	43
33.25	26.75	26.75	15.25	28	15.25	12	11.75	9.5	6.75	24.75	46.5
20.75	18.25	19.75	9.5	20.5	7	12.25	29	9.75	11.75	24.25	45
30	24.75	24.75	21.5	23.25	15	10.5	18	8.25	13.25	25	48.5
25.5	31.5	20	14.5	12.75	19.5	14	23	15	27.75	35.5	58.25
24	17.25	28.5	7.5	19	10.5	9.25	13.25	5.75	10.5	18	37
49	24.5	35.25	15	29.5	18.5	13.25	20.75	10	18	30.5	59.5
39.75	38.75	42.75	30.5	28	30	21	15	10	13	22.25	53.25
38.75	13.5	32.5	10	26.25	18	9.75	19	14.25	16.5	24.5	54
48.75	36.25	42.5	23	23.25	22	26.5	32	29.5	29.25	49.75	72.75
51	18.25	28.75	12.5	24	13.5	11	32.75	15.5	13	33.25	73
25	32.5	40.75	27	22.25	27.25	21	17.75	12	21.75	22.75	49.75
44.5	28.25	41.5	16	27.75	14.25	11.75	22.75	17.75	20.25	36	58.75
31.75	17.75	22.5	9.25	18.25	9.25	7	16	8.75	8	12.5	40
35.5	15.75	32.25	6.75	32	11.5	12.25	20	9	11.5	9	50.25
34	26	36	15.75	21.5	13.75	12	27.75	14.75	19.75	41.25	57.25
33.75	20.5	28.25	9.25	20.25	12.25	7	25	10.75	15.75	36.25	59.5
35.5	19.75	28	12.25	33.75	8.25	13.5	16.25	9.5	11	22.75	46.25
37.5	38.25	41	27.5	30	20	22.25	23	17.75	27	45.75	74
47.75	35.75	44	24.5	35	26.25	17.5	19.75	13	15.25	25.75	57
41.25	35	42.75	13.25	16.5	22.75	9.75	35.25	27.5	21.5	41.5	70.75
43.25	19	30.75	14.75	28.25	20.25	14.5	24.25	18.25	16.5	20	54.25
56	35.75	44.5	26	39	28.25	15.75	22.25	17.5	19.5	27.75	84.5
23.25	20.25	23	11.25	16.25	8	9.75	17	8.75	10	21	42
27.75	29.75	26.5	14.5	13	11.25	9	20.25	11.75	9.5	18.75	37.75
20	25.75	25.75	14.5	21.25	7.5	12.75	17.5	15.5	14.25	27.75	46.25
32	35.25	30.5	32.25	30	17.25	22	27.25	13.5	26	34.25	75.75
40.75	27.75	40.5	17.75	33.25	15.25	9	20.5	10.25	12.25	29.25	68
55	38	42.5	25	36.25	20.75	13.75	12.75	10.5	15	31.25	58.5
27	36	25.75	17.5	15	14.75	11	23.5	17.75	16.25	30.5	45.5
51.75	37.75	39.75	26.5	23.5	24.25	19.75	30.75	16.25	16.75	36	65.25
49.5	26.5	41.5	11.75	22.75	12.75	13.5	33	19.75	23.5	38	68.25
32.75	27	40.25	20	24.25	19.25	17	25.5	17.25	18.5	26	56
51.25	33.5	45.25	26.25	35.5	22	23.25	26.75	17	31.5	29	75.5
33.5	17.25	33.5	12.25	23	17.25	6.5	25.75	18.25	17.5	22.25	59.25
55.75	30.25	41	19	39	24	26.25	31	18.25	22.25	33.25	69.5
38	28.5	28.5	13	14.75	12.5	9.5	35	23.25	16.75	29.75	56.25
32.25	38.25	60.25	20.75	25.25	15.25	12.75	33	23.75	24.5	26	67.5
46	30.25	32.75	17.75	21.75	21.25	20	31	15.25	18.25	23	64.5
37	22.25	30.25	16.25	33.25	22.75	17.75	25.75	8	18.75	21.5	67
55.5	41.75	43.5	17	47.75	29.75	14.75	26	16.75	11.75	14.5	56.5
51.25	51.25	54.75	20.25	43	46.25	26.75	28.5	19.25	19	23	57.25
64.25	39.25	85.25	29.75	48.75	43.5	21.75	52.5	36.5	32	54.75	85
72	60.5	74.5	42.25	50.75	46.25	29.75	77	45.5	41.25	63	111.5
48.5	28	46.5	14.5	14.25	24.5	7	40.25	21.5	21	46.5	67.25
61	77.75	66	39	58	54.25	25.75	71.5	50.75	56.25	43.25	96.25
81.25	67.5	74.5	51.5	63.75	81.25	38.25	58	44.25	44	35.75	107.25
49.5	50	45	39.75	55.5	40.75	24.5	34.5	25	31	26.25	67.5
52.5	39.25	68.5	15.25	47	24.5	16.25	41.75	27	25.25	39.75	63.25
62.5	79	69.5	32	41.25	36.5	25	73.25	44.75	38.75	57	104.25
54.25	58.25	47.75	26.5	33.25	55	24.25	63.5	37	29.5	37	85.75
49.5	50.5	53	15.25	50.75	36.25	20	44.75	33.75	31.75	24	71
40	48.25	47.25	28.5	46.25	28.25	28.5	44.75	30.75	29.5	29.25	70.5
55	61.5	66.75	37	33.5	38.75	20.25	59	47	45.5	38	93.5
50.5	65.25	67.25	38.75	34.5	39	22.25	74	53	45	57.75	97.75
63.5	79	64.75	22.25	37.75	19.75	7.5	66.5	44.5	31.75	61.5	91.5
54.75	44	38	25.5	51	32.75	20.5	37.5	31.75	26	28	81.75
44.75	11.75	24.75	14	38.5	41.5	7	25.75	21.25	21.5	15	79.75
29.25	16	21.75	6.25	29	24.25	7.5	20	10.75	14.25	11	52.5
26	24	41.5	19.75	46.75	17.5	22.25	30.5	15.25	26	23.25	72.5
37.25	32.5	37.75	23.25	17	25.5	15.25	49.75	32.25	30.5	57.5	91.75
45.5	28.75	29.5	14.25	25.75	24.25	14.75	26	14.25	14.25	24.75	50.25
36.25	41.75	55.25	23.75	22.5	16.5	7.75	45.5	27.5	29.25	32.5	67.5
28.75	43.75	41.5	46	37	28.5	26.5	36.75	32.5	29.75	26	64.75
32.25	42.25	36.25	20	32.75	23.5	13.25	33.75	10.5	23.75	23	72.75
21.5	30.25	30.25	32.75	15.75	13.5	15.75	32.5	21.5	18	24.5	52.75
50.75	53.5	57	57.25	46.75	49.25	27	47.25	31.5	31.75	32	89.25
31.75	58.5	44	25.75	22.25	20.5	15.5	34	28	33.5	25.25	60.5
61.75	79.75	81	48.75	44	44.75	26.5	61.25	48.25	45.75	44.25	98.5
71.5	85.25	96.25	59.75	43	50.75	36.25	87	54.25	49.5	64.75	130.75
63.75	84	76.25	35.75	35	40	16.75	61	50.5	39.75	48	113.75
48.75	67.25	78.5	40.25	37	43.75	12.25	83	45.5	51	75.25	112.75
70.75	72.5	70.5	61.5	37	58.75	26	79.75	52.5	55.25	60.25	120.5
93.75	77.25	82.25	34.75	57.75	53.75	25.75	70.75	43.25	56	42.75	119.25
49.25	59.75	47	26.75	43.25	35.25	33	52.5	33.5	37.25	35.25	69.75
71.75	54	80.75	47.5	46	34.5	29.25	68	43.25	60	44.75	101.5
72.5	32.25	70	26.75	44.75	38.5	8.75	50	39.75	39.75	28.75	91.5
49.5	48	57.75	32.75	39.75	40.5	31.75	45.25	41.5	49.5	37.5	89.5
43.75	40.25	57.5	11.75	37.75	24.25	16	32	24.25	27.75	20	57
40.25	51	65.25	16.25	56.25	31	12	31.25	22.75	25.5	18.75	58.25
48	49.75	47	19.75	40	34.25	11	29.75	22	19.5	16.75	60.25
54.25	53.75	55	38.25	49	34.25	28.25	44.5	31.75	28.5	23.25	85.75
38.75	53.75	40.25	31	51.75	49.75	30.75	40.25	30	37.25	28	82.25
54	69.5	67	40.5	52	47.25	32.25	52.25	47.25	45.5	38.5	99.25
65.75	77.5	67.75	58.25	37	58	32	80	51	50.25	60.25	106.75
38	70.75	52	31.25	27	28	13.5	44.25	25.25	28.5	38.5	81.5
49.5	55	60.25	18	39.25	33.25	16	68.5	36.75	38	57.5	86.75
39.25	64.25	59.75	35	31	53.25	21.25	69	41.25	37.5	43.25	117.25
57.25	60.75	57.25	24.5	27.25	47.5	17.5	65.25	38.75	40.75	62.25	111
45.75	47.75	61.75	26.5	41.25	34.75	20.75	60.75	39.25	36	51.5	92.5
59.5	92	62.25	34.5	36	47	15.5	75.5	50.25	42.75	50.25	115
52.5	74.25	57.75	37.25	30.25	34	16.75	49.75	31.5	26	36	84.25
39.75	41.25	51.75	19.5	46.25	43.5	19	38.25	24.5	29	20	59.25
41.75	42.75	44.25	16.5	52.5	43	17.25	38.75	27.5	30	18	78.25
48.5	40.5	51.5	9.75	30.75	31	9.5	35.5	26.5	18.5	22	71.5
43.75	42	51.75	31.5	47.75	31.25	29.75	43.75	33.5	38.75	40.75	83.5
52	59.75	71.75	49.75	51.25	32.5	26	56	45.5	44.5	38	87.25
50	60.5	74	47.5	43.25	31.75	25.75	69.25	49.25	46.5	45.5	83.5
50.5	64.75	53.25	59.25	49.75	42.75	33.25	70.5	60.25	49.5	41.5	104.25
59	72.75	65.5	63.5	33.25	60	29.25	77.75	56.5	50.25	57	127
40.5	53.75	50.5	25.75	16	24.75	7.5	59.5	33.25	33.25	39	98.5
56.5	73.5	72.25	55.75	55	48.75	33.25	76.75	50	50.25	43.5	107
71	66.5	72.75	55.5	51.25	45.25	31	78.5	54.75	58	58.5	115.75
52.75	61.5	42.25	29.25	30.25	24.25	15	43.25	36.5	34.75	41.75	86.25
50.25	60.25	62	35.75	61	43.5	35	44	36.25	38	27.75	63
29.5	47.75	62	10.75	27	16.25	9	41	20	22	39.75	67.5
47	40.75	29.5	12.75	38.75	25.5	13.75	32	38.25	25.75	35.75	76.5
68.5	37.25	47.75	19.5	44.25	31.25	11.5	44.5	45	36.75	26.5	100.25
42.25	10	41.75	10.5	25.5	17	11.25	31.25	18.75	18	14.25	69.5
34	24.25	33.25	13.75	35.75	17.25	17.5	27.25	22.25	15.75	26	73.5
38	25.5	31.75	24.5	27.25	17	18.5	28.5	25	22.75	21.25	72.25
38	26.75	25.5	7	25.75	20.25	5.25	20.75	28	17	24.75	63.75
35.5	15.25	39.25	12.75	41	13.75	19	20	13.25	17.25	24.25	67.25
33.5	31	41.25	25.25	32.5	36.75	15.75	29	17.25	32.25	30.5	80.5
40.25	40.5	39.75	24.5	31.5	30	22.25	25	14	23	32.25	81
38	31	32.5	15.75	29.5	16.25	15.5	28.75	14	20.5	29.5	85.25
32.25	15	22.75	5	19.75	15.75	7.75	31.25	24.25	22.25	21.5	73.25
22.75	32.75	30.5	17	23.25	25	14.75	25	25	23.25	36.5	59.75
30.5	26.25	32.75	21.25	36.5	10.5	24.5	17.75	13	22	21	63
33.5	30.5	37.5	21.5	23.25	16.75	11	30.25	22.75	34	39.25	82.5
48	28.5	35.75	16.25	31.25	17	15.75	30.25	21.5	23.25	54.5	100.25
36	41.5	39.75	33.25	27.75	23	25.5	25	24.25	21.25	26.5	66.5
40	46.75	31.75	24.25	12.5	15.5	8.5	39.5	26.25	22.25	41.75	62.75
39.75	31	39.75	18.5	32.25	21.75	18.25	32.25	19.5	23.25	34.5	64.75
27.5	23.25	26.25	17.25	25.5	15.25	12	20.5	11.75	17.25	31.75	56.5
36.5	13	29.25	6.75	16.75	12	6	17	19	12.25	10.75	49.25
65.75	46.25	41.25	12.25	55.25	32.25	20.25	43.5	31	38.25	33.5	103.75
42	17.5	36	9.5	23.5	9.5	5.25	26.75	18.5	13.25	13	68.5
34.25	20.75	34.5	5.75	35.75	14.25	9	21.25	11.25	18.25	18.5	61
29	20.25	41.5	21	39.25	10.5	22	22	10.25	20.75	25.25	62.5
27.75	27.75	19.5	13.75	9.25	16.25	11.25	43.75	36	17.25	48.75	72
44.25	38	30	20.25	28.25	22.75	13	28	17.5	18.75	35	79
46.75	36	36.75	17	31.75	17.5	11.5	26.75	20.5	15	32.5	76.75
28.5	30.75	45.25	18	26.75	18.5	13.5	25.5	14.25	18.5	25.5	65
27	39.5	29	29.5	33.75	22	19.75	19	12	23.75	32.75	67.5
34.75	35.25	28.25	22.5	24.25	19.5	19	33	19.5	17.25	47	69.25
29.5	26	34.25	11.25	26.25	12.75	15.75	21.25	8.5	12.75	17	42
37	23.75	33.75	18	19.5	18.5	15.75	29	16.25	22.25	20.75	70.75
20.5	33.25	32.25	23.25	20.5	13.25	15.75	22.25	15.5	19.25	21.5	66
33.25	27	30.25	18	23.5	17.5	9.5	17.5	12.25	8	22.25	38
32.75	29.5	31.5	18	22.75	20.25	13	12.75	8.25	19	31.5	49.75
32.5	33.5	39	19.25	26.25	12.5	15	30.5	20.75	30.5	48	73.5
49.75	18.75	39.75	12	28.5	17	20.75	18	12.5	14.75	20.25	69
43.5	27	41.25	18	21.75	17.25	11.75	16.5	15	19	29	56.5
48	31.75	42	27.5	27	23.25	23.75	29	17.25	24	23	60.25
41.75	16	40.25	12.25	19.25	10.5	8	26.75	20.5	20.75	35.25	82.25
24.5	21.5	36.5	22.75	29.75	12.75	20	14.5	18.25	17	29.25	53
50.5	27.75	33.5	17.5	32.75	16	11	25	16	11	25.75	68
22	19.25	25.25	11.25	23.5	13.25	10.5	20.5	11.75	20.25	38.5	59.5
20.25	26	19.5	21.75	18.75	15.25	15.5	17.25	14	14.5	28.5	48.5
35.25	20.75	36.25	12.75	24.25	10.75	7.25	19.75	14.75	12.75	22.75	46.5
30.5	22.5	34.25	23	25.25	10.75	11.75	18.25	6.75	11.75	24	55
31.75	13.75	29.75	11.75	24.25	7.5	18	11.5	7.5	14.25	14.5	55.25
32.75	31.5	34.5	19.75	27.5	18	17	13.75	9.25	13.75	29	56.75
24.75	27.75	26.25	5.75	11.75	10	3.25	30.75	16	16	40	54.5
39.5	30.75	36.75	13.5	29.25	12.75	13.25	28.25	15	26.75	31.75	74.5
35.5	34.75	38.75	31.5	38	23	19	27.75	21.25	19.5	33.5	68.25
34.25	21.25	38.5	20.25	28.25	14	18.75	22	10.5	19.75	31	59
36.25	22.5	21.75	12	20.25	15	9.25	37.25	22	25	44	66
53.75	24	35	12.5	25.5	16.25	9.25	35	17.75	18.25	33.5	58.5
48.5	32.25	42	17.25	40	23.25	20.75	23.75	17	30	41	79
40.75	24	43.5	23.75	26.5	21.5	16	21.75	17.25	19.75	24	56.5
17.5	9.5	19.25	4.25	17	9	10.25	21.25	10.5	10.25	24.25	48.25
20.25	48.25	33	30.25	32.25	19.25	20	9.25	10.75	15.25	17.25	43.75
37.5	24	28.75	12.5	24.75	14.5	10	12.5	12.5	12.75	19.25	48.75
36	27.25	39.25	17.5	17.5	12.5	9.75	30.25	14.25	18.75	46.75	64.25
57.25	33.25	48.5	26	33.75	24	15.25	32.75	27	22.25	44.5	77.75
46.5	45	55	34.5	36.25	24.75	27	26.5	20.5	23.75	45	88.5
30.5	17.75	27	13.25	20.75	12.5	17.25	17	13.75	10.75	15.25	46.25
19.25	17.5	23.75	6	13.5	8.25	4.75	13.5	11.25	16.25	18.75	40.75
22.5	29	34.75	17.5	26.5	12.75	21.5	15	14	13.25	20.25	44
24.75	29.75	28.75	27.5	15	11	16.75	18.5	18	21.25	31.25	63.5
28.75	15.5	18.25	4.25	19.5	8.5	3.75	14	6.5	6.75	26.25	46.25
26	22	35	4.25	9.75	12	7	22.25	9	13.5	40.75	46
36.5	25.25	36.25	17	39.25	16.5	20	18	9.5	20.25	24.75	71.5
42.25	40	45.25	37	36.25	23.25	17.5	20.25	17	21	29.25	73
30.25	26.5	28.25	24.25	26.5	15.75	19.75	14.5	10.5	18.5	26.5	47
43.25	25.25	39.25	20	26.75	22	18.5	20.25	13.75	18.25	31.25	55.5
62	34	43	15.75	30.25	17.25	11.5	25.25	18.75	17.5	26	64.75
34.75	26	42.5	21.5	27.75	18.75	24.75	20	14	20.5	22	66.75
49.25	19.25	25.25	7.5	16.25	9	6.75	28.25	24	18.25	47.25	74.25
44.5	20.25	44.25	24	34.25	16.25	22.25	22	14.5	16	34.75	69.25
39	28.5	36.75	27.25	25.5	20.5	24	18.25	16.75	21	35	62.25
37.5	30.75	36.25	12.25	21.75	16.25	11	30.75	21	22	38.75	63.75
16.25	37	24.25	26.75	21.5	18	14.25	18.25	21.5	25.25	33	53.75
27.5	24.75	30.5	15.75	20.25	14.75	13	18	10.75	12.5	25.25	55.5
24.25	15.75	32.75	9	22.25	12	6.5	10.75	11.75	9.25	16.5	39.75
20.75	25	26.5	8	14.25	6.25	7.5	19.25	19.75	15	34.5	53.25
25.5	40.75	36.25	23	29.25	20.5	16	27.75	16.25	12.75	34.25	55.25
34.75	14	25.75	15.5	22.25	14	13	16.25	7.5	14.25	27.25	54.75
51	25.75	34.75	9	39.25	16.75	16.75	17.25	12	12.25	21	50
40.75	31	32	25.25	31.25	22.5	14.25	26	13.25	13	27.5	64
20.25	16	18	8.5	6.25	8	6.5	15	11.75	14.25	23.5	32.75
26.75	28	34.75	18.25	36.25	20.5	21.25	17.25	8.75	18.75	29.5	56
22.25	25	34.5	23	29.25	15.25	18.75	16.5	7	12.5	16	44.75
53.5	22	34.75	17.5	25.75	12.5	8.5	22.75	13.25	24.25	33.5	77.75
30.25	34.5	30.25	21	22.25	15	10.75	17	11.5	12.5	33.25	54.5
40.75	27.75	33.75	17	28.75	21.5	20.5	16	14	11	31.25	57
30	26.5	22	14.5	23.25	16.25	9.5	24.75	20	22	36.25	54
55.5	28.25	49.5	18.75	43.25	16	24.75	15.5	12	21.25	24	71.5
54.75	38.25	43.5	30.5	37.5	33	25	28	19.5	22.5	44.25	87
33	30	34.75	20.75	22.5	25.75	18.75	31.5	21.75	25.5	50.25	71.25
38.75	32	36.75	15.25	24.5	15.75	11	38	19.75	16.5	37	57.75
45.25	45	47.5	31.5	38.5	28.25	23.5	19.5	16.75	28.25	33	74
40.75	34.75	39.5	20.5	32.25	18	12	25.25	15.75	18.25	33.75	69.75
36	13.25	22.25	7.25	12.5	11.5	3.5	23	10.25	23.5	43	78.5
47.5	44.25	43.25	29.5	25.25	25	19	19	16.5	17.75	34.75	48.75
18.5	10.75	12.75	6.5	15	6	6.5	17	15.25	12.75	25.5	43.5
21.25	27.5	21.5	21	29.75	19	16.75	15.75	14	19	32.75	55.75
34	32	27.5	24.25	27.75	20.5	11.5	13	14	15	29.5	47.5
40.75	27.25	32.25	18.25	22.25	14.75	8.25	18	14	14.75	36.75	69
34	20	28.75	11.5	27	16.75	9.5	19.5	10	17.5	34.25	42.5
15.75	31.75	29.25	20.25	20	20.75	12.5	11	8	13.25	20	36
28.5	15.75	28.25	12	26	8.25	12	13.25	9.75	17	23.25	52.75
42.5	25.75	33.25	23	30.5	13	13.25	19.75	13.5	14.5	27	56
[truncated: 41,201 more rows]
