# Supplementary material for: Global sleep homeostasis reflects temporally and spatially integrated local cortical neuronal activity
Source: eLife. 2020 Jul 2;9:e54148. doi: 10.7554/eLife.54148 (PMC7332296; doi:10.7554/eLife.54148)
Supplement: Figure 1—source data 1. [file elife-54148-fig1-data1.zip › Figure 1/Firing Rates/Firing-Rate-Mouse-2.csv]

LFP 1	LFP 2	LFP 3	LFP 4	LFP 5	LFP 6	LFP 7	LFP 8	LFP 9	LFP 10	LFP 11	LFP 12	LFP 13	LFP 14	LFP 15	LFP 16
36.5	39.25	29.25	48	2.5	30.25	8.75	23.5	48.5	41	27.75	53.75	17	12.75	15	17.75
41.75	50.25	24.5	54.5	3.75	29.25	20	27.25	70.5	43.25	25.75	52.75	20.25	15.25	17	16.5
46.5	37	18.25	56	5.5	30.5	13.25	25.75	47.75	48.75	28.75	50	15.5	13.75	20	13.25
32.5	36.5	28.75	52	1	20	9	20.25	73.5	56	28.75	86.75	18	30	18.25	23.75
45.75	40.5	21.5	51.25	3.5	22.5	12.25	25	75.75	42	30.5	69.75	21	29	21.25	15.5
41.75	32.25	15	47	2.25	25	9.25	19.75	38	44.25	23.25	48.5	11.25	21.5	20.25	9
33.25	23.75	9.5	36.25	4	27	12.25	15.5	31.5	45	18.75	48.75	12.25	13.75	18.5	12.5
31.75	19.25	5.75	42.75	3	16.5	12	13	19	40.75	18.75	36.75	16	20	16	7.5
33.25	21	9.25	36	2.5	19.5	11.5	14.75	21.5	45.5	20.25	44.25	10.5	21.75	17	9.75
34.5	20.5	7.75	37.75	2.25	15.75	10	11.5	30.5	47.25	20.75	38.25	10.75	18	20	7.25
28.75	16	6.25	39.5	3.5	16.5	11.5	12	20.5	47.5	18	38.5	12.75	21.5	11.75	10.5
30	20.75	6.75	33.75	3	14	10	11	21.75	41.5	15.5	39.5	10.5	18.5	18.75	6
35.5	19.5	12	43.25	4.75	15.25	15	13.25	37.25	43.75	25	46.25	17.5	14.75	17.5	11
26.5	23	5.75	36.75	4.5	11.75	11.75	21.25	20.75	41.5	13.5	37.5	7.75	17.25	18	8
36	18.25	9	38.75	5	16.75	15.75	17.5	42.75	49.75	25.25	46	15	13.75	17.25	12.5
39.25	33.75	15	42	8	17	11.75	24.75	61.25	45	29.75	64.25	19	21.75	22.75	15
36	19.75	9.25	36	3.75	13.75	11.25	14.5	25.75	44.25	18.75	39.75	10	20.25	17	7
31.5	18	8.25	38	2.75	13	10.25	11.5	18	42.25	20.5	44.25	11.5	17.75	17	8.5
35.25	15.5	10	39.25	2	14.75	12.75	17.75	35.25	50.25	26.75	43.25	12.25	15.5	14.75	11.25
25.75	18.5	8	41.75	3.75	13.5	13	13.5	22	49	20.25	37.5	10.75	17.5	20	9
34.25	25	10.25	40.75	4.25	16.25	15.5	18	33.75	49	26.5	57	13.5	15.75	19.75	13.5
35.5	17.75	11.25	40	4.5	17.75	16.75	15.75	42.25	53	25.25	50.25	16	16.25	20	13
31.25	20.75	6.5	37.75	3.75	14.25	10.5	13.5	19.75	47.25	21.75	53.75	12	17.5	20.25	8.25
31	17	9	28	2	16.75	12	15.25	17	43.75	24.75	39	10	21	13	7.5
30.75	19.25	8.75	38	4.25	12.25	11.75	13.25	20.75	48	20.75	38.75	9.5	16.75	15	8
28.5	14.25	8.25	32.5	2	12.5	14	13.75	20.5	40.75	20.5	38.75	12.25	11.5	17	7.5
35.25	21.25	13	44.75	5.5	18.75	15.75	18.75	45.25	61	22.25	46.5	14.75	15.5	19.5	11.75
29	20.5	10	32.25	2.25	14.25	13.5	14.5	20.75	47.25	18.25	39.5	10	14	15.25	8
31.25	17	7	40.75	1.25	16.5	12.5	12.5	24	48.75	18.75	38.5	11.75	16.75	17.75	7.25
42.25	14.5	16.75	41.75	6	22	12.25	16.5	36.5	51.75	26	66.25	16.5	17.25	18	12.5
52.75	29.25	28.5	56.25	21.25	25.5	16.75	36.25	86.25	54.5	26.5	90.75	26	26	32.5	23
38.75	31.25	25.5	58	7.25	24	18.25	35.75	82.5	54.75	25.5	92.75	23.5	21.25	24.5	16.5
41	34	13.75	44.5	5.5	17.5	10.25	24.75	53.5	53	27.25	62.25	14.25	22.25	23.75	14
41.25	19.25	16.25	40.25	6.75	21.75	13.5	22	39.25	53.25	28.25	55	23.75	16.75	19.5	11.5
34	23.5	18.5	38.5	6.5	17.25	13	19	49.5	45	23.5	50.5	20	20.75	13.75	14.75
32.5	17.75	12	35.75	4	15	14.25	13.25	14	41.25	19.5	39.5	9.25	20.5	16.75	10
30.5	16.25	6.5	35.75	6.25	19	20	15.25	30	48.25	24	44.75	14	14.25	19.75	9
28.75	22.25	8.25	37.75	5.75	12.5	14.25	15.75	28.25	45	18.75	46.75	11.25	11.75	15	12.5
31.5	16.5	10.25	33.75	4.25	15.75	11.5	12.25	20.5	44	20	37.75	12.75	17.25	19.25	7.5
29	15.5	8.75	33	2.5	15	14	10	19.75	47	20.75	36.25	11.75	13.25	13.5	8
41	21.75	15	37	3.25	21.75	20.25	19	73.5	47.5	28	66	17.75	13	20.75	15.25
32.25	27.75	5.5	35.75	4.5	20.25	15	18.25	42.25	49.75	23.5	51.25	15	12.5	13	15
40.25	24.5	8.5	38	4.75	21.75	15	18	30	45.5	25	55.75	13.5	18.25	16.75	12.5
45.75	32.75	12.25	41.5	5.75	18.5	14.5	25.75	39.25	56.25	27.75	52.5	13	16	20	14.25
28.75	31.5	12.25	40	5	19.75	18	18.5	30.25	56.75	24	45.5	13	15.25	19.25	13.5
51.75	34	16	41.75	19.75	21.25	13.5	32.25	79.75	51.25	31.25	59.75	20.5	14.25	21	15
49.5	32.5	13.75	47.75	8.75	18	9.5	20.25	41.25	56.75	21.75	53.25	19.25	12.75	17.25	13.75
40.75	25.75	9.25	44.25	8.25	18.25	10.75	18.5	52.25	45.5	23.5	53.5	17.5	10.5	19	11.25
41	30.75	17.25	49.75	8	18.25	11.75	26	44	51.25	30	56	25.5	13	37.5	14.5
45.5	42.25	34.25	51.5	9.75	19.5	13.25	51.5	70.75	47.75	32.75	62.5	28.25	10.75	43.25	14.5
44.5	34.5	22	41.75	4.75	22	12.75	32.25	61	47.75	27	61.75	22.5	14	34.5	13.5
40.5	35.25	29.5	56.25	6	20.5	18	39.5	61	47.25	36.75	66.25	22.75	9.5	41.25	19.75
51.25	38.5	28.5	52	5.5	32.5	15	28.5	51.5	40.75	26.25	56.75	22.25	8	42	15.25
47	38.75	54.5	46	10	28.75	14.25	54.5	59.75	44.5	43	64.25	33.75	13	59.5	15.75
44	55	18	50.25	9.75	23.25	13	27	39.5	45.5	33.25	45	17.5	12.25	21.25	12.5
40.5	45.75	19.25	70.25	6.25	36	15.75	21.5	46.25	38	26.5	46.25	20.75	11.75	20.25	21.25
41.75	41	18	46.5	6.25	26.25	13.5	17	52.5	42.5	31	55.5	14.5	14.5	19.75	18.75
47.5	39	21.5	46	5.25	37	11.75	27.75	64.25	47.75	26.5	66	19.25	13.75	21.75	12.5
41.75	48.5	17.5	58.25	5	30.5	16.25	30	35.25	40.25	22	46	17.25	6.25	16	14.75
38.5	55	34	61	4.75	26	15.25	31.25	70.25	41.25	25.5	57.75	29	16	25.75	24
49.75	44.25	26.25	59.25	3.25	37	13.5	28.5	51.75	43.5	27.5	57.5	19.75	20.25	20.25	16.25
49.75	36	18	62	6.75	31.5	11	26.5	58.75	49.5	24.75	47	17.75	21.75	17.75	13
46	33.5	17	55.25	7.25	22.5	9.25	32.75	35.5	47.75	26.5	73.75	18.25	24.25	20.5	18.25
43.75	41.75	39	58.25	3.25	35.75	13.5	47.5	75.25	46.75	30.25	59.75	30	17.75	37.5	16.5
45	37	27	52.75	6	26.25	18.75	43.75	79.25	47.5	37.5	73.5	25.75	14.25	45.25	13.75
33.25	27.25	21.25	52.5	5.25	21	14	43	51.5	39.25	32.75	63.75	23.25	12.25	45.75	9.5
39.75	32.5	26.75	48.5	9.5	26.25	12.5	40.75	35.25	36	32.5	53.5	27.25	8.5	32.75	15.5
47	31	27	53	6.25	26.5	17.5	43	53.5	47.75	33.5	58	25.75	14.5	38.5	10.25
36.5	31	18	45	4.25	23.5	14.25	38.5	33.75	44.75	24	51	15.75	14	38.5	10.5
36.25	25	14.25	45.75	4.75	21.75	10.75	21.5	24.25	47	31.5	44	18.5	18.75	32	9.5
35.5	27.5	12.75	37.25	7	17.75	10.25	19.75	21.25	45.75	17.75	41	12.75	15.75	35.5	8.75
34.25	28.25	26.75	50	7.5	22	22.5	29.25	36.25	53.5	26.75	55	27.5	16	38.25	15.75
42.25	31.75	25.5	38.5	10.75	26.75	14.5	39.75	43.5	55.5	30.75	58.5	18.5	13	39	12.25
45	31.25	32.5	44.5	9.5	25.5	19	33.75	30.75	55.75	31.75	53.25	21.75	17.25	34	13
32	31	21.5	44	11	24.5	12.75	35	37.25	44	26	46.75	23.25	17.25	36.5	10
43	29.25	28	43.75	12.5	25.75	21	35.75	37.75	53	34.75	47.5	20	20.25	43.75	14.25
34	31.25	18.75	34.75	3	14.25	16.75	23	18.75	41.5	25	37.5	14.5	15.75	36.75	11.25
34.5	24.75	19.25	35	7.75	21	18.75	18.75	21.75	44.25	22.5	36.25	14.75	14.25	24.75	7.5
42	27.75	23.75	43.5	8.25	22.5	16.25	27.5	52.25	46.25	36.75	52.25	19.25	15.25	41.5	11.75
31.5	32	19	35.75	8.75	20.75	14.75	29.5	18.5	43.75	24.25	43.25	17.25	16.25	36.25	9
29.75	28.5	18.25	41.25	8	16.25	14	23.25	18.75	51.75	28.25	39.75	18	16	35	9.75
35.5	24.5	21.5	35.5	8.25	16.5	18.25	21	34.25	47	28.25	46.75	20	13.75	34	10.5
46	35.75	44.25	51.5	11	20.75	16.75	47	83.5	53.75	37	65.75	28	18	45.75	17
45.5	42	28	44.5	13.25	24.25	17.5	36.25	69.25	56.75	39.25	60.5	31.75	16	39.25	17.5
52.5	41.75	34.25	41.25	17	22.25	12	37	53.5	57.5	39	60.25	30	26	46.5	15.25
40.25	37	33.5	54.5	14.75	23.75	12.5	46	81.25	51.5	27.75	60	25.75	13.5	45	16.5
50.5	42	35.5	44.25	10.25	23.75	19.25	53.75	34.75	58	37.25	67	28.5	21.75	44.75	19.25
41.25	31	28.75	44	9.75	23	16.5	30	34.5	57	34.25	52	21.75	17	43	12.75
34.75	38.5	34.75	48	17.75	20.5	15	45.25	74.75	45.75	25.5	52.5	33	13.25	45.25	13.25
47.75	46.75	40.75	39	10.25	35	10.75	50.5	57.25	51	30.25	65	26.25	13	39.5	15
48.5	35.5	42	41	8.25	24.25	8.75	33.25	49.25	57.25	30.25	48.5	26.75	13.25	46.25	16.5
49.5	40	41	48.75	8.25	30.25	11.5	46.75	60.5	46.5	37	73.75	30	14	48.75	14
45.75	52	46.25	52.75	5.25	28.5	19.25	53.5	47.75	55.5	34	74	28.5	10.25	49.25	14.5
49.25	36.25	41	48.25	5.25	32.25	13	31.5	61.5	46.5	34.5	61	32.25	18	41.75	14.25
45.75	36	40	53.5	3	33.25	10.5	40.5	58.75	56.75	30.5	69	24.75	14.25	51.75	10.25
54.25	30	42	52	12	32.5	11.5	43.5	44.25	55	36	81.75	29.5	26.25	47.25	14
43.5	26.75	44.25	51.25	6.75	27.25	13.5	49	65.25	56.25	31.75	79.25	30.25	19	54	23.75
30	33	46.5	51.25	8.25	28.25	14.75	50.75	56.25	51.5	27.75	56	37	11	57.75	15.25
26.75	41.25	38	44.5	10.5	28.5	19.75	46.25	53.5	41.5	35.25	58	25.75	13.5	45.5	11.75
29.75	55.25	29	61.75	8.75	28	10.75	39	41.25	41.5	19.5	50.75	15.75	12.25	16	9.75
35.5	38.5	22.75	54.25	11.25	33.5	9.75	28.5	49.75	35.25	18	47.5	22.5	9.5	16.25	11.5
29.25	28	12.75	42.5	9.75	29.75	6.75	21.75	42.5	46	16	39	22	11.25	8.5	8.75
39.75	35.5	20.75	59.75	9.75	21.75	7.5	19.5	38	51.75	18.5	54.75	19.5	16.75	13	11.75
28.25	28.25	12.75	48.75	5.25	17.5	7.5	17	41.25	43.25	15.75	50	19.25	14.5	7.75	13
31	36.25	12.25	55.25	6.75	18.25	6	18.75	43.5	43.75	20.75	44.25	21.75	11.75	11.25	11.25
26	36.5	15.25	55.25	3.75	21.75	10.25	17.5	44.75	40.25	19.75	49.75	18.5	14.75	12	11.25
32.5	35	9	63.75	6.5	18.75	9.25	20.75	33.75	43	26.75	48.75	21	13.75	14.25	9.25
42.25	45	31	53.5	7.75	41.25	13.25	48	37.75	51.5	31.5	62.75	31.75	15.25	44.5	14
34.5	40.25	29.75	48.25	7	30.75	14.75	45.5	22.5	46	34.25	67.75	21	13.75	49	13.75
40.5	58.5	14.5	64.25	5.25	25	10.5	26.25	22.75	38.75	23.75	50.5	15.5	11.75	19.75	11.25
40.75	41.25	35.25	63.25	6	31.5	15	49.75	43.75	44	34.5	64	26	12.25	42.75	15.25
40.5	29.5	30	47.25	14	19.5	16.25	42.25	36.75	38.25	34.25	56	28	13.5	37.5	14
33.75	37	18.25	49	8.75	26.5	10	27	24.75	39.25	22.25	46	17.25	17.25	11.75	13.25
31	35.5	16.75	55.5	6.75	26.25	10.25	23.25	42.25	46.5	20.75	47.5	20.25	15.75	11.75	14.25
35.75	35.75	23.5	66	9.25	25.75	11.5	25.5	29.5	40	22.25	47.75	18.25	12.75	17.25	14.25
34.75	34.5	18.25	49	8.75	16.75	6.5	19.5	37.75	45.25	19.75	51.75	19	14.75	11	9.5
33.75	36.5	19.75	54	8.5	16.25	9	26.5	36.5	47	19.5	54.75	18.25	18	9.75	13
41.5	45.25	28.5	60.5	11.25	22.25	10.75	35.25	36.75	54.5	31.25	69.75	23.25	26.75	22	16
38.75	35	28	59.75	8.5	39.5	11.75	34.75	38.5	47.5	29.25	47.75	24.25	19.75	23	13.75
36.25	45.5	37.5	53.75	5.5	38.25	14.25	32.25	42.5	54.75	29.5	56.75	22	15.5	28.25	20.25
40.25	62.25	34.25	64.75	7.75	35.25	15	35.5	37.75	43.75	26.5	52.75	23	14	26	15.75
29.5	30.25	24.75	56.75	11	28	9.75	26	46.25	37.25	23	49	18.5	9	20.75	14.75
28.25	24.5	12.5	50.25	8.5	15.75	7.25	20.5	39.25	37	17.75	47	18.5	6.25	8.5	10.25
43.75	33.25	26.75	62.5	9.5	25.25	13	40.5	36	43.5	32	59.75	25.75	19	23.5	16.5
42.75	37.75	27	51	7.25	23.5	22.25	50	48.25	45.75	30.75	72	27.75	12	51	14
35.75	55.75	26	47	10	28	22.75	47.5	29	45.75	31	57	25	10.25	36.75	16
40	37.5	26.5	67	3	23.25	20.25	20.75	60.25	48.75	36.25	54.75	27	11.5	23.25	40.75
34.75	36.25	21	60.25	4.5	38	18.25	24.75	51.25	44	28.5	52.5	19.25	15.5	20.5	15.5
35.5	37.25	31	58.25	5.75	26.25	18.25	24.75	54.5	39.75	22.25	49	23.5	13.75	22.5	22
47	68	27.5	70.25	4.5	34	14.75	32.5	56.5	44	24	58.25	16.5	14.75	21	19.25
31	36	22.75	63.25	7.25	24.25	15.5	27	38.75	41.25	25.75	54.25	24	15.75	19.75	14.5
36.5	38	31.75	57.25	6.25	41	12.75	43	59.75	46	26.25	70	25.25	16.5	33.5	15
47.75	36	39.5	50	5.25	32	17	44	47.75	49.25	31.25	68.25	25.75	14.5	57.25	13.25
49.5	35.25	40.25	55	4.25	32.25	16.5	51.25	50.75	49.75	34.25	64	29.5	15	52.25	10.75
41	29.25	43.25	48.5	6.25	35.75	15.75	40.25	45.75	49	31.75	56.75	25	14.25	53.5	12
44.5	30.5	38.5	42.75	5.5	26.25	13.75	36.5	28.5	48.25	26.75	55.5	22.5	11	51.25	10
44.75	26.25	44	52.75	7	33.75	14.75	49.5	53.75	54.75	40.75	67.5	27.75	10.75	49	15.5
38	29.25	31.25	48.5	4.75	32.5	13	28.75	23	51.5	27.75	46.75	18.25	14	45.5	8
41.75	29.5	39	46	5.75	27.5	12.75	31.25	20	50.5	29	53.5	22.75	16.75	46.5	11
44.25	26.25	42	42.75	6.25	24.5	18.25	36.75	45.5	45	31	58.75	31.25	19.5	50.5	14.25
37.5	29.25	26.5	46	3.5	22	11.5	35	22	45.5	28.75	48.5	22	20	44.25	9.5
47.75	25.25	37.25	48.25	2.5	34	10.75	32	31.75	52.25	32.75	55.25	23.5	19.5	49	12.75
49.75	21.5	36.75	46.75	4.75	24	15.25	35.25	28.5	50.25	28	58.25	22.25	16.25	44.25	11.25
52	34	37.25	49	5.25	30.5	16.25	44.5	53.75	50.75	36	64.75	29.75	15.75	51	14
45.75	38.5	42.5	43.25	3.5	34	11.5	34	53.75	50	28.25	64.5	28.5	10.5	48.5	15.75
44.75	26	43	41.75	5.25	29.75	12.25	36.75	42.25	56.75	29.75	60.75	29.5	16	50.5	12
55	44.5	33.75	61.5	7.75	32.5	19.75	50.25	55.25	49.75	36.5	67	27.25	18	49	18
43.5	42.25	25	66.25	5.25	35.5	16	33	70	44	26	54.5	18	18.75	23.25	16.75
46.25	40	34.25	60	10.5	27.5	14.25	39.75	59	43.25	26.25	58	34.75	18.75	26.75	17
35.25	32.75	49.75	50	5.75	33	13.25	36.75	75.25	51.5	35.75	66.25	32.75	20.5	41.5	21.75
39.25	48.25	31	45.75	5	27.5	20.5	47.5	79	53.25	33.75	62.25	26.75	18.25	47.25	16.75
27.75	35.75	39.25	39.5	5.5	20.5	16.5	40.75	58.5	42.75	34	62.25	24.25	10.5	42.25	17.5
40.5	29.75	31.25	40.25	10.25	16.25	16.5	36	58.75	39.25	35.5	54.75	29.75	22.5	28.25	14.25
37.5	31	38.75	59.25	9	21	14	30	105.25	60.25	47	72.5	24.75	31.5	26.75	28
26.5	37.25	32.5	68.5	4.25	26.25	19.75	22.5	91.75	52.25	42.25	72.75	15.25	36.5	19.75	24.75
34	62.5	30.25	74.5	3.25	24.5	17	28.25	53.75	51	27	62.5	20	21.75	16.75	17
34	44.5	23.25	64.25	2.5	25.5	15.75	22.5	74.25	50.25	40	56.5	20.5	17.25	25.5	16
35.25	39.25	22	61	3.75	25.25	20.25	24.75	43.5	42.75	34.25	52.25	19.75	20.75	18.75	16.25
31.5	34.75	37.75	56.25	5.5	17.75	19.25	20.75	112.25	54.75	44.5	76.5	21.5	40	16.75	25.75
31.75	31.5	37.75	52.75	4.25	18.25	13.5	27.75	88	61	34	52	20.25	23.5	25.5	23.25
35.75	40.5	33.25	50.5	3.25	18.75	21.25	27	84.75	47.75	35	58.5	27.25	23.25	17.75	19.5
45.5	29.25	40	56	9.5	24.25	15	38	97.25	64.5	49	84.5	25.25	33.5	30.25	28.5
54	20.5	36.5	47.25	11.75	21.25	12.5	31	56.75	75.5	35	86.5	25.25	25.5	34.25	28.25
38.75	20.25	32.75	54	13	21.25	11	32.75	55	75	30.75	73.25	24.25	20.75	30.75	22.25
43.25	22	38.5	60.25	12.75	27.25	13.75	41	52	70.25	35.75	73.75	30.25	22	36	24.25
65.75	54	63.5	91	22	53	16	63.75	60.75	67.5	40	81.25	33.25	22.25	41.25	22.25
45.75	37.75	75.5	75.5	15	42	19.25	56.75	124.75	75.5	70.75	80.75	52	40.5	50.5	29.75
49.5	24.5	42	68.25	10.25	27	12	39	78.75	69	36.5	89.75	24.25	40.75	33	28
55	39.25	39.25	75.25	12	43	14.5	45.75	77.5	67.25	43	69.25	28.5	31	32.75	21.75
65.75	30.25	37.75	60.25	7	24.75	10.5	33	69	73	39.5	101	24.25	52.25	30.5	24.25
54.75	57.5	66	95.5	15.5	48.25	18.25	67.5	75.5	63	51.25	71	43	32.75	51	23.75
50.75	41.5	44	81.75	7.75	36	19.25	41.25	90.25	55	52.25	86.25	25.75	24.25	32.25	23.75
39	48	35.75	56.75	9.75	28.25	23.75	40.75	75	51	45	63.25	34.5	21	36.75	18.75
40.75	36.5	44.5	57.75	7	32.75	20.5	47.5	90.5	61.25	45.75	74.75	28.75	38.75	33.75	28.25
49.25	33.5	43	59.25	6.25	24	19.75	27.75	79.25	63.25	34.75	83.75	23.25	48	23.5	24
43.5	24.25	37	42.25	14.75	26.25	11.25	36.25	50.5	76.25	28.75	89.5	30	23.75	35.5	25.5
40	22	51.5	52.5	20.5	32.25	16.25	41.5	43	70.75	39	85.5	34.75	30	46	26.5
76	47.75	68.5	97.5	21.5	54.75	24	66.25	93.75	73	53.75	77.5	49.25	31	61.75	31
58.5	33.5	72.75	64	15	36.5	22	48.25	91.75	73.5	51	102.25	39	56.25	49.25	30.5
51	31.5	49	65.5	18	43.25	14.5	49.75	47.25	73	33.75	84.25	37.25	27.75	41.5	23.5
50	42.25	62	79.75	16.5	47.75	20	67.75	104.5	56	57.5	75	41.5	35.25	59.5	29.75
44	49.75	44.25	74.5	8.25	30.75	19.25	49.75	91	46.5	40.5	74.25	28.75	24	37.75	21.5
54	25.25	52.25	51.75	4	16.5	18.5	24.75	80.25	58	37	78	27	53	28	26.75
41	41	52.75	59.25	6.75	27.25	19.25	40.5	120.75	49.25	50.5	73.75	27.25	42	34.25	32
60.75	21.25	50.5	53.25	9.5	20.5	13.75	30.5	85.5	80	40.75	98.75	27.5	36.75	31.75	35.75
53.25	27.25	65.5	59.25	20.75	34.5	19	46.75	80.25	71.25	44.75	83.25	39.5	31.75	50.75	19.75
71.25	22	50.25	56.75	11.75	24.25	14.75	35.5	72	72	42	98.75	33	26.75	38.5	31.5
56	26	65.75	65.75	16.25	33.75	17.25	49	85.25	70.5	42.5	94.5	36.25	44.75	46.25	24.25
53.25	28.5	65.75	69.5	13.75	32	20.75	48	85	75.25	47.75	88.5	36.75	35.5	42.25	24
56.75	27.25	72	66	14.5	27.5	21	44.75	96.75	75.75	49.5	92.75	38.25	31	43	27.25
62.25	23	58.25	54.75	17.25	27	18	44	72.75	71	37	78.25	31.5	27.5	32.5	21.75
69.75	26.25	52.25	53.25	11.25	28	14.25	35.5	67	66.25	32.75	95.5	24	31	35.75	22
54	31.25	56.5	64.5	13	25.25	15	38	83.75	65	43.25	88.25	35.25	30	32.75	21.75
47.25	23.25	60.5	57	17	26	20.75	42	80.25	62	37.75	64.5	39.25	17.25	32.5	21.75
50.25	30.5	71.75	63	10	29	23	40.75	107	60.75	50	92.25	29.75	36	37.5	31.5
61	23.25	55.5	56.5	11.25	28.25	14.75	33	75.75	55.25	32	86.25	30	29.25	31.25	20.25
60.75	25.75	53.25	56.5	9.25	22.75	15.5	30.5	84	68.75	42.25	90.5	32.5	34	34	21.75
59.5	35	53	67	12.75	34.75	19	43.25	88	67.25	43.5	83.75	39	28	40.5	23.5
51	26	55	62	9.5	28.75	18	38.25	103.5	83.75	54	89	38.75	36	39.25	32.25
39.5	22.75	29.25	49.25	7.25	26.5	11.5	36.25	51.25	75	29.75	78	25.5	23.25	31.5	20.25
45	18.5	33.25	50.25	7	29.5	11.25	31.25	51.5	70.75	31.5	79.25	28.75	17.5	37.75	22.5
54	27	30	64.25	10.25	24.5	13.5	33	67.25	66.25	27.25	88.75	25.5	18.25	33.5	20.5
55.75	35.75	71.25	84.75	21.25	54.25	22	66.25	126.5	82	57.5	82	49.5	33.5	58.5	27
55.25	30.75	51.25	63.75	11	34	23	38.75	90.25	74.5	50.25	79.75	40.75	37.75	40	29.25
44	26.75	49.5	58.75	7	26.25	21.75	38	76.75	73.75	39.25	87	32.75	34.5	36	29.5
67.25	21.75	29.25	46.75	6	27	15	28.25	77.75	60.25	33.5	89.25	31	24.25	31.5	21.75
59.75	37	55.75	73.5	10.5	44	20.5	51.25	105.5	56.75	45.25	75.25	42	41.25	35	22.5
47.5	39	51.25	59.5	7.25	27	13.75	41.5	78.5	83.75	34.5	103.25	24.25	42.75	32.5	28
53.5	37.5	71.25	64.5	15.75	40.75	17	60.75	80	79.75	49.25	83	38.5	37.5	50	24.5
79.25	20.75	42.25	52.75	15.5	32.75	15.5	34	53.25	74	32.25	100.5	31.75	27	39	28
66.25	32	56.75	63.25	14	34.75	18	49.25	98.75	73	48.75	84.75	42	21.25	43	24.5
68.75	33.5	56.75	65.5	13.75	36.25	16.5	43.75	70.25	80	42	98.5	30.25	47	41.5	22.75
46	21.5	44.5	52	17.25	37.5	10.5	48.75	36.5	84.25	40.75	80.25	38.75	22.5	48	18.5
47.5	25.5	51.25	60.25	27.75	43.25	13	54.5	41.75	77.5	38.75	82.5	39.5	17.5	48	19.75
43.5	29	48.5	63.25	24	45.25	14.75	51.75	40.5	72.75	36	66	38	14.25	47.25	18
55	23.5	52.75	54.75	23.5	41.75	12.75	56	56.5	82.25	33.75	81.5	37.25	24.5	49.75	24.25
79.5	26.5	49.25	60.25	17.5	42.25	23.75	42.75	82.25	80.25	39.5	95	32	37	40	24.75
51.5	33.5	49	55	13	33.5	16.5	49.75	84.5	84.75	39.5	86.75	30.25	31.75	38	27.25
54	28.5	35.75	56.25	8.75	33.25	10.25	34.75	57	71.5	31.25	84.25	24.75	24.25	38.5	24.25
56.75	34	68.25	66	10	34.25	18.75	43.75	112.25	73.75	52	84.75	37.5	46.25	47.25	33.5
73	31.5	66.25	72.5	26.75	56.25	18	64	60.25	90.25	53.5	109	52.75	44.75	63.75	29.75
65.75	30	53.5	60	17.25	35	17.5	41.5	93.5	74	42	78.75	37.75	39	36.25	28.5
55.25	31.5	60	56.75	9.25	28.5	14.25	45	89.5	87.25	40.25	92.5	23.25	68.75	34.75	25.5
73.75	29.5	69.25	77.5	16.25	44.25	13.75	63.5	89.5	78.75	45	99	38	42.75	47.25	27.25
64.5	30.75	65	62.25	17.5	35.75	17.25	46.5	96.25	78.25	52.5	94.75	35.75	46.5	45.75	27.5
63.75	33.5	66	58.75	11.5	32	14.75	43.75	97.75	83.5	36.5	89.5	32.5	45	39.5	30
71.5	31.25	56.5	52	9	30.5	10.25	42.25	52	77.25	36.25	100	31	44.5	41	29.5
68.25	24.75	73.5	57.25	16.5	34.5	21.25	54.25	106	81.5	49.25	92.75	39	35	46.5	33.25
69.5	27.75	60	54.25	10.75	33	12.25	46.5	73	80.25	33.75	110.25	33	54.25	39.25	27.5
72	23.75	60.75	65.25	12	38.25	19.75	45.75	89.5	83.25	46.5	97.25	33.25	34	42.75	26.25
63.75	29.5	81.5	63.75	19.25	38.5	13.75	58.75	85.5	90.75	49.5	93.5	34.75	50.75	54	25.5
56.25	31.75	69.75	56.5	17	35.5	18	54.5	86.5	80.5	44	90.75	39	40.5	46.75	27.5
47	22.75	76	49.5	12.5	29.75	14.25	40.25	65.75	73.25	34	83.5	33.5	45	37.25	21.25
61.25	32.75	67.75	63.75	13.5	34	19	53.25	95.5	74.5	44.75	99	35	54.75	45	31
65	21.25	60.75	48.75	13.25	27.25	14.75	45.75	95	59.25	31.5	83.75	34.25	36.25	33	20
52	35	72.5	68.5	16	35.75	23.75	55	82	75.75	47.75	96	36.25	46.5	48.25	29.25
53.25	33.5	70.5	62	15	37.75	17.5	50	75	96.25	42	84.25	43.25	43.25	45.5	27.75
66.5	27.5	66.25	64.75	19	36.75	27	46.75	87.75	86.75	46	104.5	43	33.75	46.75	35.75
54	30.25	45.5	57	9.5	21.25	16.5	37	69.75	83.75	39.75	104	25.5	54	39.5	27
69.25	39.5	71.25	66.25	27.75	34.75	17.25	53.75	101.75	77.25	53.75	87.25	43.5	40.5	50.75	29.5
69.25	31	73.5	67.75	16	40	19.5	59.75	87.75	95.75	56.5	109.75	41	52.5	59.25	28.25
65.75	21.25	49.75	52.75	10.75	23	13.5	32	75	71.25	33.75	92	28	53.75	31.25	23
53.25	30.75	65.25	66.5	17.75	34.25	16	57.75	104	81.75	57.25	94.75	38.75	58.25	54.75	31.5
48.5	32.5	56.75	56.25	15	29.75	15.75	45.5	65.5	82.25	41.75	70.75	34	34.5	42.25	23.25
67	34.25	71	66.5	16.5	35.25	18.75	48.5	74.75	79.75	44.75	98	40.5	42	51	30.25
50.5	25.5	74.5	52.5	13.75	28.25	17.5	48.5	79	82.5	49.25	93.5	31	48.25	44	24
59.5	32.5	56.75	61.25	10.25	26.25	15.75	44.5	74.75	71.5	36.25	85.5	29	31	37.75	23.25
40.25	30.5	43.25	61.25	17	36.5	11.75	42.5	56.25	77.25	36.75	89	30.75	31.25	45.75	23
46.5	31	47.75	61.25	19.5	37.75	15.75	44.5	64.5	72.25	34.75	90.25	36.5	23.75	46	25.75
70	25.5	27.75	53.75	12.5	30.75	18.25	36	60.75	68.25	32.5	93.75	30.75	40.75	34.75	25.75
70.25	59	85.5	94.25	26.75	64.75	22.5	75.25	127	62	53.25	73.25	46.5	29.5	59.5	24.25
57	31.5	44.25	44.75	11.75	21.75	18	41.75	104	85.5	47.5	95.25	29.25	54	36.25	31
60.75	29.5	65.75	66.5	14.5	35.5	22.75	53.75	95.5	87.5	52.75	93.25	43.75	49.75	46.5	31.25
56.5	33.25	55.75	58.75	18.25	38.75	12.25	50.5	58.5	81.25	41	91.5	38	25	48.25	26.25
79	33	60.75	74.5	19.25	43.75	20.25	52.25	85.5	73.75	53.5	98.75	47.75	30	55	34
59	38	74.25	71.5	19.5	41.25	17.75	59.5	82.75	90.75	50.25	114	41.75	39.5	61.5	33
70.75	40.25	68	75.5	12.75	38.5	28	56.25	126	72.75	63.5	88.75	44.25	34.5	55.25	28.25
49.5	30.75	30	51.25	11	25.75	10	37	54.5	69.75	33.75	87.25	25.25	27.75	30.5	24.75
30.75	26.5	26	48.5	10.25	26.75	12.75	29	44.5	66.75	26	89.25	27	23	29.5	21.25
35.25	31.25	43	56.5	12.75	32.75	9.5	38	47.75	75.5	34.25	80.5	32.5	27	40	21
54	29.25	48.25	61.25	13.5	40.25	12.75	44	56	69	34.5	89.25	40.75	25.75	40.5	24.5
50.25	27.5	31	57.25	8.25	30	11	33.25	47.5	67.75	34	98.5	27.75	26.5	35	24.75
74.5	61	78.75	82.5	33.75	62	23	74.5	101.75	75.5	56.75	85.75	54.25	27	69.75	28.75
62.75	47.75	78.25	74.25	20	45	23	66.5	111.5	78.5	50.75	90	45	34.75	53.25	29.75
54	34.25	60.25	62.5	13.75	33.75	13.5	52	89	95.25	43.25	108.5	33.5	35.75	51.75	27.75
52	22.5	37.5	53.5	14.25	31	14	37	46.5	75.5	39	98.75	35.25	27	39.5	27.75
80.75	53.75	69.25	80.5	24.25	55	22.25	62.25	101.75	70.75	55	95.5	44	31.25	60.75	34.25
68.75	96.25	71.25	104.25	14.5	62	24.5	81.75	71	66	54.5	108.5	42	36.5	72.25	35
31.75	46.5	28.75	41	9.5	16.5	14	18.5	75.25	48	23	75.75	24.25	20.25	18.25	18.75
41	27	23.5	45.5	7	15.25	8.75	13	56.75	39.75	15	62.5	20.5	13.25	15.75	10.75
34	31.5	17	38.5	2.5	16.5	9.25	14.75	52	40.75	13.75	65	22.5	10.5	20.75	13.75
32.5	38.75	26.5	45.25	4.25	23.5	14	23.75	68.75	36.25	22	74	25.5	12.5	20.75	17.25
29.25	50.75	32.75	57.5	7.5	30.25	15	29.75	71	36.5	24.75	68	25.25	14.5	28	14.25
39.5	58.75	53.25	58.5	9.5	35.5	16	40.75	83.75	41.75	30	78.75	40.5	23.5	36.5	22.5
48	45.5	51	81.75	14.75	47.5	26.5	50	59.75	50.75	36.75	64.75	26	19.75	40.75	19.75
42.5	46	42.75	80.5	19	42.5	15.25	51.25	51.5	44	36	63.25	27.25	17	36.5	14.75
43.5	48	54.5	80.5	11.5	45.75	18.25	56	49.75	50.25	48.25	88	31.75	28.5	53.75	20.75
42.25	38.25	40	62.5	22.25	30.5	13.25	40.25	36	45	31.75	63	22.5	21.5	29.5	26.5
49.25	32	30.75	55.25	15.5	25.25	12.25	36.5	49.75	54.25	34.5	75.5	26.25	30.25	35	19
38	24.5	32.75	34.5	7.25	12.5	5.25	16	103.5	61.25	26.25	89.25	26.75	32.25	21.25	25.75
33.75	32	23.5	52.5	2.75	13.5	12.25	17.75	74	62	27.25	98.75	21.75	34.25	25	31
40	19.25	18	45.25	2	15.5	7.75	17.5	47.75	66.25	39.75	76.5	21.5	34	29.25	31.75
42.75	26	18	54.25	4.75	21.5	7.5	18.5	60.75	57.75	29.5	83.25	21	39.25	29.25	25.25
56.75	20.5	25	48.5	2.5	17.25	6.75	16.25	61	57.75	21.75	75.5	25.5	31.5	22.75	31.5
39.75	26	34.75	44	6	14	11.25	19.25	84.25	77.75	32.75	71.5	27.75	40.5	24.75	34
27.25	24.5	18	42.25	2.25	13	12	11.25	85.75	71.75	29.5	81.5	22.25	29.25	18.75	22.25
22.5	20.5	22.75	44.5	1.25	11	10.5	15.25	71.75	71	26	76	18.5	24	18	20.5
26.75	23.75	20.5	45	1.5	21.5	13.75	13.5	84.5	81	28.5	84.75	19.25	24.25	20.25	26
29.75	21.25	27.25	43.75	0.5	13.25	12	16	85.5	68.5	29.25	79.75	19.75	23.5	18.75	27
46.5	29.5	37.25	50.25	5	23.75	11.5	19.25	73.5	50	26.5	71.5	22.5	36	18.75	28.75
50	35.5	46	65.75	8.75	31.75	22	37.5	56	44	36.5	69.5	27.5	32.5	37.75	25.25
42.25	45	33.25	64.75	10.25	26.75	14.5	43.75	52.25	37.75	36.75	63.5	19.75	24.5	32.25	17.75
38.75	53.25	47	75.75	6.5	31.25	19.5	28.25	64.25	39	38.25	70.25	28.5	18.75	29.75	29.75
44.75	44.25	28.25	50	6.75	42.5	16	27	59.5	33.25	19.5	53.25	25.5	17.25	23	19.75
37.25	34.75	18.75	58.25	8	36.25	10.25	31.5	54.75	30	17.75	55.25	16.5	17.25	11.5	14.25
44	34.5	20.5	57.5	4	31.25	15.25	35.25	55	49	28.5	65.5	27	23.5	25.5	17.75
46	40	16.5	55	5.75	43.25	15	31.5	34.5	49	31	59	19.25	15	22	15
49	75.5	31.25	50.75	3	37	19	41	46.5	53	40.5	83	25.75	19.5	28.25	21.25
50.75	62.25	38	58.5	2.75	36	20.5	33	29.5	48.75	28	65	25	20	31.25	18
42.5	46.25	29.25	66.5	6.5	27.75	25.25	27.25	46.5	38.5	34	50.75	21	21.75	29.75	25.5
41	45	31.75	63.5	4.5	31.25	17.25	29.25	35.5	52.25	34.25	62.25	29.25	21.25	32	20
40.25	33.5	28.25	67	4.5	29	12.25	28.75	44	46	40.25	72.25	32.25	20.75	35	24.25
37.25	31	18	51.25	5.5	34	14.75	21	49.25	46.25	29.5	48.25	22.25	23.25	16.75	22.5
48.75	47	26.75	70.5	3.5	31.25	23.5	32.75	48.75	50	28.75	56	17.5	19.25	32	31.5
46	39	26	52.25	2.5	35.25	18.5	32.75	62.75	49	35.25	71.25	24.25	19.75	26	17.75
49	41.75	43.75	39.75	4.25	26.25	12	30.5	79	43.5	34.25	77.75	30	23.75	40	19
49.75	45.25	57.75	53.5	5.25	29.25	16	32.75	64.5	45.5	29	72.25	26.5	17.75	49	14.25
42.5	36.75	37.25	45.75	2.75	23.25	11.75	28.5	67.5	42.5	31.5	67.75	31.25	17.25	51	17.25
41.5	36.5	40	42.5	3	24.75	12.25	38.5	61.5	50	36	71	31.75	16	45.5	17
43.25	42.25	40	52	4	30.25	16.5	43.5	46.5	47.75	23.75	65.75	31.25	12.25	41.25	16.5
47.75	37.5	44	45.5	3.75	27.75	14	33.25	45.5	44.5	41.5	53.25	27.75	13.25	44.75	16.5
46	48.75	23.5	63	7.75	30	19	30.25	39	37.75	33.25	59.25	19.25	15.5	19.5	14.25
55.75	36.25	25.75	59.75	5	23.5	10	19	59	41.5	34.25	57	22.75	21.75	19.25	17.25
47.5	39.75	26	65.25	7.5	29	22.25	21.5	78	43.75	47.5	66.25	28	22.5	25.25	19
33.5	53.5	27.25	66.25	3.75	22.25	15	32.25	59.5	49.25	23	80.5	20	18	18.75	17.5
30.75	40.25	33	40.25	2.5	20	12.25	22.25	67.5	47.75	18.75	67.5	28.75	15	19.25	17.5
44	52	27.75	52.75	3.25	39	15	38.25	44.75	41.75	25.25	60.75	22	17.5	21	15.5
47	56	30.75	59	4.75	33	19.75	36.5	49.75	44	34.25	62	28.5	21	21.5	16
58.75	48.75	26.5	60.25	6.75	35.5	13.5	41.25	58.75	42.5	30	60	24.25	22.5	31.5	18
45.25	42.5	26	59.25	4	35.25	24	39.75	56.25	39	31.25	63	27.5	17	36.25	17
41.5	30.75	28.25	52.25	5.5	37.75	17.5	36.5	63.5	36.75	39.5	57.75	27	17	47.25	15.5
38	32.5	24	49.5	2.5	26	17.75	31.25	44	41.5	29.25	58.25	19.5	14	36	15.5
40	33.75	27.25	47.5	4.25	30	18.25	32.5	61.75	43.5	39.25	62	25.25	15.25	46	14.5
42.25	30.25	20.75	47	5.25	24.5	12.25	28	38.25	40.5	27.5	52.75	17.25	13.5	45	14.5
39.25	25.25	25.75	46.75	3.5	21.25	16.5	28.75	43.75	43.25	33	55.75	24.5	14.25	35	11.5
42.75	26.75	22.75	45.75	3.25	24.5	16.75	26	33.25	47	30.25	49	15.75	14.5	39.75	16.25
42.75	22.25	28.25	40.25	4.25	24	16.25	29.5	33.25	45.5	30	49.5	21.5	14.5	39.25	13.75
39	23.5	25.75	41.75	5.5	22	16.5	33.5	32.25	42.5	23.5	53	20.25	16	37.5	14.5
47	27.25	28.75	45.5	7	26	15.5	27.5	41.75	41.25	27.75	63.5	23.5	13.25	29	15.25
50.25	31.5	24.5	47	4	22.5	20	33.75	52	45	30.5	56	21.75	16	35.5	12.5
49.75	28.75	30	50	5.25	23	15.25	40.75	28.5	47.25	31	55.25	25.25	16	44	15
57.25	24.25	29.75	37.25	4	23.25	18.75	34.75	64.25	52.5	27.5	66.5	27.5	19.5	41.5	16.75
52	30.75	26.25	42.75	3.25	21.5	14.75	28.25	52.25	40.25	28.25	58.25	18	20.75	35	12.5
47	28.5	28.25	50.25	5	22.25	14.25	27.75	56.5	49.5	29.25	58.5	20	13	30.25	13.25
45	33.25	36	46.5	4.5	23.25	16	34.25	71.25	50	42.75	72.5	25.5	18.25	34.75	17.75
43	38.5	26.75	38.25	3	25.25	12.25	37	62	47	24.25	61	35.25	18	29.5	16
47.75	44.5	32	62.25	7.75	28	16.5	35.75	38.5	36.75	31.75	50.25	21	12.5	31	15
45.25	41.75	30.5	61.25	2.75	40	16	33.25	55.25	48	30	61.75	22.75	18.25	25.75	19
33.75	64.5	25	58	5.25	20.75	18.25	29	93.75	49	48.25	64	21.5	23.25	21.5	21
40.5	54.25	21	57	2.75	30	21.5	21	48	44.25	23.75	49.5	18.25	18	17	25
39	48	20.5	56.25	2.75	24.25	18.25	24.25	50.5	44	27	52	13.5	23.25	18.25	22.75
39.25	47	25.75	49.75	3.5	27.75	25.5	27.75	60.75	43	26.5	54	25	17	29	25.25
40.5	26.5	36.25	43.5	5.75	14.75	21.25	20.75	75	46	32	82.5	14.5	37.25	17	31.75
43	45.75	31	56	5.25	29	17	30.75	52	53.5	29	63.75	15.5	27.5	17.5	23.5
39.25	50	26.25	55.5	5	24.5	20	33	60.25	54.75	26.5	47.5	22.25	19	20.25	20.5
39.25	58.75	17	62.25	4.25	25.25	22.75	20.5	51.5	50.75	26	48.25	19.5	23.25	22.75	19
32.25	42.25	22	65.75	8.5	17.5	23.5	18.5	41	47.25	28.25	51.5	17.5	16.25	17.5	17.75
32.5	50.75	19	51.5	6	23.25	20.5	21.75	39.75	43.5	29.75	46.75	18.25	21.75	20	11
37.25	41.5	29	62.25	10	23	21	18.75	53.25	55.25	32	63.5	22.25	18.75	19	21.75
23.5	38.75	20	47	13.25	16	19.75	14.75	33.75	53.75	24.25	51.5	16.5	16.5	14.25	20.75
38.5	33.5	29	52.25	12.5	17	15	15.25	58.75	55.75	34	59.25	23.5	25.5	22	23.25
33.5	55	17.5	53.5	4.5	29	18.5	27.25	38	51	26.5	47	16.75	16.75	21.75	13.5
26.25	41.5	26	52.75	9	20	23.25	19.25	51.75	56.5	31.75	68.25	19.25	15.5	22.5	17
32.75	29.75	22.5	58.75	9.5	14.25	19.75	13.75	32.5	47.25	24.5	57.75	18.25	22.75	13.75	22
33.5	34.5	50.25	54	10.75	22	21.75	22	99.75	58.25	42	74.75	24.5	28.75	28	31.75
28	39.25	24	56.75	9	23	20	20.5	65.75	56.5	32.25	57.5	18.75	28.5	20.25	20.5
27.25	29	17	47.75	20.25	19	21	16.5	28.5	60.5	25.5	65.5	19.75	18.5	12	16.5
38.25	33.75	21.75	60	5.25	23.25	17.5	18	38.5	57.5	24.25	49.25	17.25	18.25	19.5	13.75
37.5	60.75	21	42.75	6	25.75	11.75	21.5	52.75	55.25	25.5	64.5	12.75	22.5	20.75	19.25
36	35.25	22	49.75	10.25	18.25	14.75	16	49.5	59.5	24.25	70.75	13.75	23.75	19.5	21.75
40.25	27.75	13.5	48	6	17.75	14.25	15	30.5	54	22	55	21.75	30.5	20	18
32.75	31	16.5	50	3.25	12	15.5	18.25	40.25	47.5	21.75	59.25	26.25	34.5	15.75	21.5
37.75	38.75	26	53.25	4.5	15.75	15.5	16.25	46.25	57.75	32.5	67.25	23.5	46.5	19	21.75
53.5	35.5	37	60.25	8.75	26	14.5	26.75	53.75	56.75	28.75	89.5	19	50.75	22	23
39	36	11.25	43	9.75	15	15	17.75	57	51.75	30.5	57.5	21.25	32.25	21.25	20.5
45	36.25	24.25	52	7.5	20.25	13.5	21.5	53.25	50.25	29	67	21.5	30.5	17	20.75
49.75	48	32.75	63.25	4.75	30.5	19.75	29	50.25	52.75	25	52.5	28	26	18.5	17
41.25	39.25	24.25	53.5	5.5	19.5	25	18.75	39	50.25	30.5	53.25	10.5	27.75	22.5	20
41	37.5	26.75	48	9.75	20	22	23	49	56.25	31.25	58.75	21.75	22.5	19.25	17.5
35.25	44	23.25	52.25	11	31	20.5	23.75	35.75	61	33.25	55.75	19.5	19	21	15.5
34.75	33.25	21.75	54.5	17	14.75	22	13.25	49.75	52	31	62.25	15.5	17.5	15.5	21
36	28	33.25	48.25	7.25	18.25	15.5	19	43.25	57.5	23.25	59.25	11.75	27.75	17.25	18.25
41	27	28.5	46.5	7	21	16	17.5	49.5	53.75	26.75	59.75	14	32.75	18.75	17
48.75	32.75	30	63.5	10.5	33	17.5	28.25	43.5	64.75	25.25	85	15.5	33.25	14.25	19.25
49.5	33.25	21.25	54	6.5	21.25	13	24.25	45	54	29.75	52	20	25.5	24.25	14.5
42.75	45.5	27	55.75	4.75	30	17.25	24.25	71	47.75	41.5	58.25	24.5	24.5	25.75	20.25
46.5	38.5	15	48.25	9.25	20.5	19	17.5	29.75	60.25	19.5	57	18.25	29	15.5	21
37.5	37.75	17.25	47.5	4	19	17.5	15.5	38.25	62.5	23.25	62.5	20.25	33.5	20.25	21.25
44.5	36.5	22.75	47.75	7	18.25	18.25	13.75	53.75	52.75	26.5	62.75	22	44.5	19.75	31
59.25	36.75	30.25	52.25	5.75	21.75	19.25	27	65.75	60.75	33.75	71.25	26	52.5	25.25	26
62	38	58	65.75	11.5	41.75	20	57	70	66.5	49.75	89.75	42	42.25	61.5	21
54.5	25	31	50	4.25	22	14.75	36.5	59.5	64	34	90.75	33.25	36.5	39	19.75
56	29.25	49.75	70.75	16.75	43.25	21.25	54.75	63	78.5	44.75	93.25	47.75	33.75	52.5	17.75
63.75	48.5	96.25	108.75	31.75	82.75	27.5	94.5	76	79	68	91.5	66.25	59.5	95	31.25
60	45.25	67.25	73.5	18.5	57.5	23	55.5	70.5	71.5	50.5	99.75	47	46.75	58	28.75
57.5	54.75	72.5	85.75	18.75	57.5	26.5	69.75	70.25	69.25	57.5	105.25	40.5	44.25	58	34.75
47.75	49	70	87.5	28.75	70	29	67.5	60.5	77	68.25	89.5	41.25	36	63.75	29
43.75	34.25	33.5	61.75	24	29.75	24.5	32.5	31.25	59	34.25	63.25	22.25	28.5	31.25	23
48.25	35.5	35	74.5	15.5	31.75	20.75	30.5	66.25	64	31.25	72.5	26	26.25	33.5	26.25
48.25	46.5	26	47.5	5.5	24.75	18.75	21	33.75	50.25	32.5	54	21.5	26.25	24.75	18.75
45.5	57.75	36.25	58.25	3.75	26.5	21.5	28.5	69	48.25	38.5	65.5	21.25	29.25	25.75	24
54.25	41	41.25	70.5	7.75	40.5	25	45.25	71.25	56.5	47	71.25	27.25	28.75	39.25	23
44	47.75	24.25	57.75	5.25	30	16.75	22	48	50.25	30.75	59	19.75	21.25	26	20
40.25	44.5	26	53.25	12.25	20.25	21.75	21.75	57.5	48.5	36	58.75	23.5	21.25	24.5	22.5
49	42.5	29	51.25	8	29.25	16.25	28.5	67.75	49.25	28.75	63.25	18	22	20.25	21
41	40.75	36.5	71	9.25	34.75	27.5	39.5	83.5	67	41.5	75.25	20.5	26.25	36.5	18
52.5	30.5	33.25	56.5	4.75	23	19.25	24.5	68	52.25	38	80.5	26.25	43	30	26.75
63.75	45.75	64	81.75	22.25	51	15.5	63.75	57.25	68.5	55.25	105.5	49	34	61.75	26.5
43.5	46	61	72	13.25	39.25	24	41	79.75	54.25	50.25	80.75	45.25	30	52.75	23.5
46.75	41	34.75	56.25	9.75	35.25	22.75	33.25	67.5	47.25	28.5	59	35.75	13	37	18.5
46	45	34.5	56.5	6.25	37.75	17.5	34.75	71.75	55	36.25	77.5	27.5	24.5	27.25	18.25
37.75	49.75	29.25	59.25	6.25	28.25	20.25	31	61.25	50.5	31.5	61.25	21.25	19.25	29.5	17.25
42.25	37.25	17.5	49.5	5.75	28.25	23.25	26	39.5	41	30.75	53	22.5	17	25.5	28
32.75	27.75	29	44.25	5.5	18	29	36.5	60.75	46.25	29.75	56.5	21.25	20.75	19.25	23.5
32.75	33.75	39.75	50	5.75	18.5	22.75	32.25	70	53.25	27.25	65	20.75	19.5	21.75	22
33.25	33	28	56.25	7.25	15.25	22.75	27.25	66.75	54.5	26.5	56.5	23.75	14.25	20.75	19.25
30	32.25	39.5	47.5	3.25	11.75	20.25	22	73.25	52.75	26	52.75	17.25	15	20.5	28.5
39.75	30	37	52.25	3.25	23.5	27.25	27.5	59.5	55.75	36.5	59	23.5	21.5	21	23
49.5	18.75	37	36	7.75	14.5	17	27	68	77	41.25	90.5	36.25	34.75	37.75	26.75
45	16.5	32	38.5	9	19.75	15.25	30.25	42.5	62.5	30.5	87.25	37.5	27	45	19.75
61.5	28.75	54	68.75	23	42	21.25	53.75	66.25	79.5	43.5	89.25	42.5	48.75	53	24.25
71.5	24	45.75	52.25	17	25.25	17	37.75	65	79	40.5	94	35.75	54	43	20.5
60.25	31.25	77	72.25	31.75	48	24.75	70	87	70.75	52.75	94.75	49.75	75	67	30.5
37.5	14.75	29	39.75	9.5	19.5	20.75	30	48.25	84.5	33.25	79.75	34.5	18.25	43	19.75
40	18.75	40.5	49.5	12	22.25	17.25	30.75	59.5	84.75	30.5	76.25	32.5	27	44	16
40.5	23.25	40	52.25	17.5	29.5	19.25	40.75	43.75	82.5	34.25	80.75	37	17.25	44.75	16.75
56.25	25	52	62.25	21.25	36.75	22.25	55	42.25	71.75	46.5	89.5	43.75	30.75	55	19
60	26.75	49.75	72.25	26	40	26.25	46.5	57.25	73.25	50.75	98.75	40.25	45.75	57.75	17.75
89.5	39.75	74.75	75.25	31.5	52.75	29	53	107.75	79.75	65.5	101	42.5	81.25	55.75	37.25
55.5	29.75	40.25	45	16.5	29	15.5	37.75	64.75	70.75	36.25	71.75	30.25	29.5	36.75	19.75
54.75	22.75	52.5	54.25	24.25	38.25	19.5	51.5	70	76.5	38.75	67.5	35.75	33	51.75	16.75
40.75	22	39.25	44	15	24.5	14.75	36.75	66.5	60.75	32.5	53.75	31	29.5	39	15
36	15.75	33.25	38.75	14.25	17	17.5	30.75	61.75	67.5	28	61.25	24.75	37	32.5	13.5
45.25	17.25	35.5	46.75	13.25	23	20.5	36.25	68.25	66.25	32.25	61	30.25	27.25	39.25	13.5
42.5	18.75	40.5	45.25	17	29	14.25	44.25	91.75	61	39.5	59	38.5	24.25	38.75	17.5
45.5	14.75	23.5	41	7.75	17	17.5	25.25	79.75	54.5	29.75	79.25	29	45.25	31.75	15.75
60.25	23.75	32.75	56.5	16.5	28.25	14	32.75	70.25	68.5	29.5	88.75	31.25	46.25	30.75	22.5
61.25	22.75	29	45.75	17.5	17.5	20.75	27.75	71.75	54.5	42.25	96	25	39.5	30.25	23
63	27.25	24	54.75	20.75	20.5	18.5	27.25	58.25	60.75	33	95.25	21.5	37.5	24.5	22.25
55.25	20.5	20	42.5	8.5	14.5	13	15.75	80.5	55.25	24.25	89.25	28.75	29	16	32.75
35.5	17.5	27.75	37	3.25	9	11.5	16.5	87.75	57.5	25.5	80	26.25	42	22.5	25.5
37	14	25.25	33.25	1.75	8	14.25	11.75	76	53.5	17.5	90.75	19.75	33.75	20.75	23.5
25.5	16	20.75	31.75	3.25	10.5	15.5	17	71.75	59.75	21	89.5	20.75	31.25	15	26.5
40.25	28.25	14	49.75	6	22.75	17	21.5	66.5	47.25	23.25	79	20.75	24.25	18.5	21.5
35.5	21.75	11.25	45.5	6	12.25	13.75	16	72.5	50.25	23.25	49.5	19	16.5	14.5	27.25
38.75	32.75	23.5	60.5	10.25	26.5	15.75	29.25	78	40.25	25.75	49.75	21.75	23.25	22.25	27.25
50.75	31	23.25	59	9	19.5	16.25	26.5	62.25	46.25	20.75	50.75	22	26.25	19.5	19.25
47.5	48.75	25.75	62.25	7.75	24.5	16.25	24.75	77.5	43.75	30	49.75	27.25	24	27.75	25.25
49	33.25	27.25	57.25	10.5	26.25	13.5	21.75	62	46.75	23.5	45.75	25.25	24.25	19.5	17.25
51.25	29.75	40	46	1.5	15	11	14.5	79.25	68	31.25	72.75	22.25	43.25	25	25.5
38.5	23	35.5	43.75	3.25	15.25	15	21	85.25	51.25	29.75	64.25	20.5	29	19.5	13
40	21.75	25	51	1	13.25	11.5	25.5	47.5	43.25	22	73.5	18	29.5	15.25	18.25
29.75	22	21.75	48	2.25	16.25	11	12.25	63.25	47.5	28.25	54.25	27.5	60.5	22.25	22.5
28.25	17.75	28.25	39.25	2.5	11.75	14.5	17.5	49.25	61.25	24.25	64.75	22.75	73.75	17	21.25
36	26.5	17.75	49	2	13	11.75	20.5	65	42	22.5	59.75	17	33.25	15.75	18
35.25	16.5	14	30.75	1.25	11.25	9.5	12.25	67.5	72	27.5	86.5	18.5	42.25	18.25	21.25
32.75	24.5	22.75	47.25	4.75	14.5	15.75	19.25	50.75	42.5	22.25	54	13.75	34.5	14.75	21
27.5	35.5	23.75	51.25	8.75	17.75	14.75	23.25	46.5	28.25	13.25	44.5	13.25	19	11.75	17.75
35	34.25	24.25	61.75	8	14.75	10.25	30.5	55.75	33.75	16.75	37.25	17.5	17.25	12.75	16.5
40.75	30.75	25	51.75	2.75	11.25	12.5	22	80.5	56.75	28.25	76.5	24.75	28.5	14.25	24.5
34	19.75	30.75	35.5	4.25	14.25	20	13.5	107.25	72.5	30	78.5	32	27	22	22.25
33.5	21.25	24.75	38.75	3.75	20	16.75	16.25	92.5	71	30.75	71.25	29.5	22.75	22.25	28.25
37	24.5	25	50.75	4	19	18.75	15.75	81.5	56.25	29.25	69	25	27.25	16.75	22.5
55.75	28	33.25	53	9	18.25	13.5	21.75	76	43.75	30	78	26.5	30.5	22.5	20
38.5	13.5	12.5	34.75	2	7	15.25	13.75	37.75	57.75	29.5	83.25	22.25	26.75	24.75	20.75
53.75	12.25	20.25	35	5	12.25	13.75	21	20.5	44	26	88.75	25.75	36.5	30.75	13.25
51	15.5	31.75	43.5	10.75	19.25	12.5	30.5	38.5	64	29.75	102.5	24.25	28.75	32.25	15.5
36.5	19.25	20.75	45.5	7.25	14.5	15.5	18.5	35.5	69	25.5	85.75	24.75	25.25	24.25	18.25
54.25	25.5	36.5	53.5	20	26	15.5	37	49.5	63.25	33.5	92	36.5	40.75	39.5	22.25
43.75	17.5	18.75	41.5	11	9.5	14.5	16.5	36.75	53.75	16	72	19.25	28.5	20.75	12.25
51.25	15	38.75	42.5	16	15.5	11.25	25.5	38.75	58.75	24	79.25	24	40.75	34.75	16.5
55.5	32.25	48	62.75	28.5	34	19.75	45.25	62.75	82.75	38.75	93.5	31.25	44.25	44.25	24.75
67	39.75	68	76.75	27.25	51.75	25.5	74	74.25	59.5	50.25	83.5	45.5	44.25	59.75	29.5
55.25	27.75	44.75	53	10.75	22.5	14.75	39.25	63	73.75	42.75	101.25	35	43.25	38.5	26.75
48	22	36.25	47.5	14	23.75	17	31	37.5	72	38.75	83	27.75	22.25	44.25	20
35	14	19.75	42.5	7	12.75	11.25	18.25	32	65.5	25.75	67.75	19	13	27.25	13
36	17.25	32.5	39.75	7.75	15.5	11.5	24.25	35.5	59.25	27.5	69.25	28.5	16.5	35.75	15
49.25	16.5	21	39.25	10	12	17.25	18.25	39.5	58	25.5	88.75	20	39.75	22.5	17.5
64	26.25	69.5	56	22.25	32.75	19	47	56.5	79	44.5	118	42.25	41.5	50.25	23.75
55	30	50	67.25	20	37.5	20.75	40.75	63	67.5	53.5	96.5	35.25	37.75	48	19
58.5	23.25	49.5	52	19	30.5	12.25	46.25	44.75	69.5	40.25	107.75	38	44	48	19
44.75	22.25	25.5	46.5	15	17.75	12.25	33.75	32.25	61.75	27.25	92.25	23	35	30.25	17.5
50.25	31	59.25	74.5	25.75	42	21.75	61.25	61.75	73.75	46.25	87	43.5	38.25	57.5	22.75
65.75	34.5	60.5	60.25	28.75	39	17.25	58.5	82.25	69.75	54.75	98	43	55	51.25	24.25
59	28.5	44.25	54.75	16.5	30.25	13.5	42	63.25	52.25	29.25	85.5	28.25	30	35.25	21.75
55.25	44.5	51	66	14.5	33	19.75	51.25	61.25	52.75	38.75	60.5	30.5	32	41.5	20
61	29.75	39.75	54.75	16.25	21.25	16.25	45.5	63.25	68.75	42	76.75	33.25	48	40.5	26.25
45.25	16.75	18.75	44	6.25	15.75	11.25	27.5	32.25	67.25	27.5	88.5	29	19.5	30.5	14.5
47	21.5	35.25	53.25	14.5	23	12.5	34.25	44	62.25	29.5	85.25	30.5	27.75	37.5	19.5
56.75	19	45.75	47.5	8	19.75	15.25	30	57.25	74	42.75	107	26.25	50.5	33.5	23.75
37	18.75	34.75	39.5	9.25	13.5	15.5	25	38.75	67.5	28	107.75	24.75	31.75	29.75	24.75
45.75	21.25	40	47.25	14	24.5	15.25	36	35.25	77.5	33.75	85.75	31.5	31	42.25	15.25
24.25	17.5	17.75	35.25	5.75	10.5	10.75	14.75	37.5	70	25.5	91.75	17	34	20.5	17.25
58.5	26.5	59.75	64.25	26	40	20.25	48.5	85	78.5	60.5	99.25	38.75	49.75	55	24.5
42.75	18	46	46.25	11.5	27	15.25	38.5	61	72	46	101.5	29.75	40.5	46.75	22.25
69.25	20.25	37.25	48.25	9	21.75	18.75	25.25	57	66.25	42	98.5	28.25	51	39	20
64.25	22.5	67.5	54.25	16.5	34	23	43.5	84.75	62.5	57	92	38.75	61	48.25	28.75
65.75	30.25	73.25	62.75	20	41	22	52	77.25	49.75	48	79.75	32.75	40.25	53.75	24.5
57.5	15.75	26.75	39.5	6.25	14.25	17.5	20.25	61	64	31.25	94	24.75	46.75	29.25	21.75
48	14.5	20.25	42.25	7.5	14.25	15.5	19.5	30.75	68.5	22	102.5	24	36.75	31.5	15.25
42	12.75	23.25	44.5	7.5	15.75	11.75	21.25	30.75	65.75	23.5	86.25	24.25	46	30.75	15.75
63.75	26.5	56.75	66	22.75	36	22.5	42.75	78.25	75	48.5	84.75	37	61.25	48.25	23.75
55.5	28.75	70.75	67.25	16.75	37.75	20.75	51.5	83.75	69.5	47.5	88	33.5	57.25	57	29
43	27.25	40.75	57	13.25	25	17.5	32.25	61.75	62	35	86.5	23	29.75	41.25	17.5
75.5	29.5	56.5	54.5	18	25.5	25.25	39.25	112.25	66.75	55.25	95.25	37.5	78.25	40	33.5
45.25	12.5	16	35	13.75	9.75	16	18.25	58.75	59.75	20.75	64.25	19.25	28.75	24.25	19.25
44.75	20.5	34.75	47	13.5	25.75	12.25	39.25	57	62.75	26.25	69.5	23.5	31.75	32.75	16
44.5	18	33.25	40.5	16	21.5	14.5	29	52	69.25	30	65.5	26.5	35.25	39.25	12.5
48	23.75	47.75	55.25	17.75	34.75	12.25	45.5	62	63.75	40.25	82.25	37	38.5	53.25	20.25
47	18	32	45.25	11.25	27.5	14.75	36	62.75	49.75	28.25	74.25	25	43.5	35.5	19
36.5	22.25	43	47.25	19	29.75	14.5	45.5	43	57	31.25	62	29.25	30.75	49	17.5
52.5	32.5	40.75	63.5	17	32	21.25	45.5	67.25	69.5	38.75	83.25	30.5	44.5	41	15
55.75	26.25	50	63.25	15.5	38.75	11.25	54	64.75	57	31.75	79.5	35.25	27	44	18.5
44.75	25.5	34.5	53	6.5	18	16.75	21.75	87.75	44.25	33.5	81.5	23.5	32.75	26.75	31
58	24.5	29.5	44.25	9.75	12.75	12	22.25	80.5	46.75	26	70.5	17.5	27.5	20.5	20
39.75	15.75	24	37	1.25	9.75	10.25	8	60.75	71.5	26	74.75	17.25	25	21.5	22
49.25	16.5	28.25	37.75	0.25	9.25	12.5	12.5	62.5	71.25	20.75	74.75	16.75	23.5	20.25	22.5
54.25	15.75	22.5	35.75	1.25	8.25	13	15	60.5	62.5	27.25	87.75	12.25	51.5	16.5	19.75
54	13	19.25	32	1	8	13.75	13.5	67	61.5	17.5	74.25	14.25	33.5	13.25	21.5
51.75	13.75	17.5	27.75	1.25	7.75	12.25	14.25	54.25	67	20.75	76	14.5	36.5	15.25	20.25
53.25	17.75	11.5	31.5	1.5	9.25	11.5	12	52.25	66	18.25	80.25	11.25	32.75	9.75	16
71.5	19	22.25	38.5	1.5	8.5	12.25	13.75	60	64	22.5	85.25	12.5	38.5	16.25	17.25
67.75	17	14.75	32	0.5	7.25	7.5	9.25	63.5	73.75	20	86.75	11.25	33.5	11.5	20.25
38.25	16	11.5	29.75	1.25	7.25	11.5	11.5	47.25	53.5	17.5	70	12	23.75	9.5	19.25
36.5	14.5	15	35.75	1.25	6.75	12	14.25	54.5	67.75	25.5	76.25	12.5	26.25	12	16.5
30.75	12.5	13	30.5	1.75	7	12	11.25	46.75	58.5	24	55.25	9.5	18.5	13.75	14
15.5	11.25	9.75	20.5	3.75	6	12.25	11.25	47.75	54	16.5	54.75	11.75	18.5	8.25	10.25
33.75	14.75	20	26.75	0.5	6.25	11.75	7.75	56	57.25	20.75	61.75	7.5	35.75	13.5	17.5
59.75	18	19.75	35.5	1.75	8.5	15.5	9.25	74	65.5	18.75	68.75	10	29.75	13	17
28.5	11	12.5	27.25	0.5	5.25	10	9.25	54	57	20.5	63.25	10	21	8.25	14
65	20.5	18.25	32.75	1	11	19.75	15.5	69.25	60.5	24.75	70.25	13	36.25	12.5	18.75
57	21.75	19.5	42.75	1.75	10.75	24	13.5	77	62	27.25	82.75	15	39.5	18	25.75
57.5	30.25	15	44.5	6.75	14	16.5	15.75	87.75	51.75	28.25	56	20	29.25	16.5	27
51.75	21	22.25	35	1.75	9.25	10	24.25	44	47.75	22.25	80	12.5	30.5	20.25	24.25
56.75	21	16	42.5	2.5	11.75	15.75	15	63.75	49	23.25	62.75	13.5	31	14	25.75
37	25	20.75	54.25	1.75	12.75	13.75	20	50.75	41.5	17.25	63.25	16.25	25.5	19.25	22.75
38.25	27.75	27.75	40.5	2.5	12	10.75	20.5	79	51	24.25	64	18.25	43.75	19.5	24
39.75	29.5	16.5	55.25	2.5	14.5	17	17.75	83	37.25	24.25	51.5	17.25	26.25	15.5	23.75
43.5	17.25	25.25	31.5	3.75	9	16.25	16.25	127	68.5	28.5	105.25	20.5	21.5	21	34
42.5	17	28.5	39.25	3.75	9.75	16.5	14.25	106.75	64.25	28.5	86.25	15.75	23.25	22.5	27.75
39.5	18	22	36.25	1.75	9	15	15.5	97	69.5	31	65	17.5	16.75	17.5	29.25
21.25	10.5	18.25	26	0.5	6.75	12	13	75.5	85.25	24.5	69	13.5	18	19.5	22
34	19.75	25.25	42.25	2	14.75	22.5	13.75	79	60.5	39	54.25	19.75	24	18.5	22.25
52	23.75	33.25	33.75	1.5	10	11.5	12	68.5	76.5	37.25	87.75	16.5	60	19	32.5
49.5	16	20.75	32.5	1.5	9.25	10.75	13.75	55.25	54.5	27.25	89.5	12.25	56.5	14.75	18
41.5	23.5	22	32	8.25	11	15.25	12	74.5	67.75	29.75	79.5	14	43.5	15.75	26.25
28.5	11	21.5	27.25	1.25	7.25	13.5	10	80	70.25	30.25	81	16.25	18.25	15.25	18.75
37.5	25	30.75	38.25	1	8	12.5	9.5	80	62.25	34.25	76	15.5	16.5	16.5	23.25
32.25	13.75	22.75	21.25	0.25	4.5	11.75	11.25	90	43.5	22.25	107.75	15.25	22.25	19.5	24.75
31	15.75	30	33.25	3.25	9	11.5	13.25	67.75	50.75	18.75	84	12.25	23.75	18.25	24
34	15.25	31	27.25	4.75	10	13	12.75	55.5	65.5	17.75	86.25	11.75	38.75	21.25	24.75
37	16	15.5	32.25	1.5	6.5	9.75	7.75	64.5	70.75	22	96.25	9.75	54	11.25	36.5
19.5	14.75	9.75	30.5	1.75	5	16.25	7.25	61.75	51.25	18	84.25	10.5	33.25	16.75	23.75
54	18.25	20.75	37.25	2	8	16.25	14	86.25	51.75	27	84.25	11.75	28	19.5	25.25
58.5	19.5	28.75	44.5	3.5	12.25	15.75	19	82	49.5	35	68.25	19	28.5	21	24.5
59	23.25	28.75	34.75	2.25	12.25	15	18.75	69	66.25	32.75	79.75	21.5	36.75	29	26.75
63.5	35.5	30.25	51.5	2.5	13.75	16.5	13.25	71.5	49.5	37	79.75	18.5	47.75	13.75	25
64.5	25.5	20.5	35	4.75	14	14	16	80.75	61.25	33.5	76	19.5	54.75	25.25	24
43	19.5	26.5	45.5	16.25	20.25	19	33	62.5	67.25	26.25	80.75	24.75	35.25	37.5	20.75
49.75	19.5	32.25	45.25	13.25	22.5	18	28.25	59	56	29.75	76.5	26.75	38.75	32.5	18.75
37.25	17.5	21.25	41.75	8.5	10.75	16.25	20.5	61.75	67.75	26	80.5	20.75	37.5	23.5	16
45.25	22.75	31.75	44.5	13.5	19.25	15.5	31.75	51.25	62.5	31.75	73	24.25	39.75	41.25	18.25
32.25	18.25	43.5	48.5	18.25	34.5	18	46.5	39.25	80.25	29.25	72.25	33	24.75	39.25	20.25
33.25	26	40.75	47	17.75	29	15.25	41.5	61.5	77.5	32.25	77.75	32.5	33.5	41.25	20
47	21.5	37	53.25	11.5	24	15.25	37.25	58.25	63	30.25	86.25	31.25	43	40.75	17.75
43	30.5	67.5	60.75	23	43.5	13.25	65	73.5	65.5	35	70.75	39.75	28.25	52.75	19.5
43.75	27.75	42.75	44.75	9.5	20.75	17.75	26.5	106.25	38.5	31.25	79.75	26	30	31.25	24.25
79.25	36	41.25	45.5	6	21.25	24	16	88	59.75	31.75	90.75	15.25	77.5	27	30.25
82.5	43	31.25	46.75	4.25	17.75	22.75	28	76	60.5	36.5	87.5	17.75	60.5	21	25.25
57.5	30	19.75	44.25	7	18.25	17.75	24	63.75	57.25	20	55.25	21.5	33	27.5	16
94.75	52	70.25	73.25	16.5	54.5	31	55	84.5	75.75	52.5	100.75	43	62.25	54	33.25
40.5	33.5	66.5	58	7.75	32.5	21.25	37	70	57.75	35.5	75.75	24	34.75	35	27.25
33.75	34	33.75	40.25	2.5	11.5	21.5	24.5	53.75	57.25	29.5	64.5	16.75	26.5	20	26.5
30.25	29	34.25	39	3.75	14	18	18.5	56.5	55.25	30.25	70.25	13.5	22.25	18	29.5
38.75	29.75	20.25	39.75	3.25	13.5	18.5	16	51	59.75	29.25	65.75	10.75	21.25	14.5	23.25
34.75	36.75	30.75	34.25	2.75	22	17.75	17.25	66	60.25	28.25	70	13.75	21.25	20.75	32.75
34	29.5	27	41	2.75	17	21	16.75	61.75	53	29.75	62.25	14.5	17.5	14	24.75
37.75	29.25	29	46	2.5	16	15	18.75	58.25	56.5	36.25	67	15.25	25	18.25	26
38	28.5	25.25	47	3.25	16.5	21.25	15.75	58.5	66	37.25	70.25	15.5	25.25	19.5	22.75
33	30.25	29.5	39.5	3.25	17.25	16	18.75	61.25	57.75	24.5	67	18.25	19	15.25	21.25
29.5	30	32	45	7.25	13.25	20	15	52.75	61.5	33.5	55.25	20	17.75	18.25	26.25
35.5	28.5	25.75	50.25	3.25	19.75	22.75	21	55.25	55.5	26.5	61.75	11.5	30.75	16.25	26.75
39.75	41.75	18.75	42	2.75	18	25	21.25	48	51.75	27	47.5	12.5	27.5	17	19.5
35	44.5	22.5	45	1.75	17.5	23.5	23	55	48.5	22	45	18.75	25.75	17.5	23.25
40.75	31.25	27	34	4	14.75	28.75	25.75	47.25	50.75	27.5	46	11.75	20.5	14.5	20.25
33.25	32.25	27.25	39.75	4.25	10.5	20.75	22.75	48.75	42.75	24.75	38.75	15	22.25	18.75	22.75
31.25	37	29.5	30.75	2	12	20.5	22.25	55.25	41.75	31	45.25	14	21.75	18	30.5
50.5	35.5	19.75	39.25	3	16.75	20	23.25	59.25	44.25	18.75	56.25	13.75	24.75	17.75	27.5
37.75	37.75	32.25	47.25	3	20.25	17.75	19.25	76.75	40.25	32.75	57.75	21.25	26	20.25	22.25
31.5	30	33.5	41.5	1.75	17.75	16.25	22.25	76.25	52.75	34.5	61.75	17.5	24.75	26	24
30.5	27.5	27.25	36.5	2.5	15.25	17.5	21.5	52	40.75	23	49.75	16.75	19.5	15.25	20.5
28.5	29.5	30	39.75	4.5	18.25	24.5	24.25	52.25	53.25	31.25	45.75	15.25	22.25	14.25	23.25
35	25	34	39	2.75	11.5	20.25	22.75	46	45.75	28.5	51.5	13	23.25	12	23.5
35	22.5	26	35	4	11.5	20.25	25.75	41.75	56.75	29.5	51.25	10.75	22	17	22
49.25	32.75	42.75	47.5	2.75	11.25	21	26.5	56	51.75	30	68.25	15.5	27.25	19.75	25.5
45.5	38	37.25	48.25	2.5	13.5	16	10.5	68.75	49	23.75	62.25	18	21.25	15.25	30.75
41.5	25.75	37.75	43.5	1.75	16.25	17.5	22.5	69	50.75	30.25	66.75	16.25	19.5	15.5	20.75
47.75	36.75	30	47	2	26.5	14.75	16.75	63.25	51	24	67.5	19.25	18.5	16.5	24
34	35.75	24	37.25	3.25	15.5	22	17	53.75	42.5	21.75	52.25	14.75	15.25	15	25.25
28.25	25.5	31.25	41	3	12.25	19.75	15.5	59.25	50	26.25	60.5	11.5	22.5	15	23.25
37.75	32.25	33.25	37.75	2	13	18.75	23	53	42.25	18	56	13.25	16.25	16.25	22
42.75	23.25	23.75	38	2.25	17.5	23.25	20	61	41.5	20	41.75	14.5	21	14.5	16.5
46	26.5	38.25	47.5	3.5	14.75	24.75	24.25	76.75	49.75	30.75	58.5	17.5	35.5	15.75	20
37.25	27.75	27.75	42.5	2	13.75	24	20	64	47.25	26.5	38.75	14.25	22.25	18	20.5
36	31.25	28.75	45.75	1	10.5	16.5	22	52	43.75	23.5	45.5	15	31	20.25	17.5
52.75	24.75	27.25	39.25	1	12.25	19.25	11	83.75	71.25	32.25	92	20.75	24.5	25.5	42.75
35	24.75	25.75	41.5	1	13.5	21.75	17	65.5	58.75	32.75	66.25	23.25	26	21	18
54	20	30.5	39.75	3.25	13.75	16	17	61	55	29.25	90.5	23.5	41.5	29.25	23.75
66.5	21.5	23.75	46.75	2.75	15	16.5	16.5	88.5	60.75	37	92	18.5	54.75	24.25	17.75
53.25	14.5	29.75	30.5	6.75	19	11.75	20.75	37.25	72	30	100.25	25.25	32.75	35.25	19.25
39.25	12.75	32.5	31.25	7.25	13	11.25	18.75	19.5	62.5	24.25	89.25	18.5	25.25	37	19
28.75	13.5	24.75	33.5	6	10.25	12	16	25.5	62.75	23.5	79.5	17.75	17.25	28.75	10.75
38.25	19	40.25	39.25	9	22.75	14.75	25.75	45	67.75	28	85.25	25.75	23	41.75	18.25
37.25	15.5	26.5	39	11.25	14.25	14.25	19.5	38.25	68	24.5	85.75	20.5	28.5	25.5	18.5
43.25	20.25	29	37.5	7	17	19.75	19.25	44.5	67.5	28.75	92	17.75	31.75	26.25	20.25
50.25	21.25	50	56.25	17.75	29.25	17.25	39	36	78.75	34.25	88.75	30.5	42.25	44.75	23.5
58.5	24.25	55.25	54.75	19	35	25.75	39	78	69.75	54.75	101.25	33.25	52	50.25	22
40.75	15.5	23	43.25	6.5	15.5	18.75	17	29	59	24.5	87.25	21.5	30.5	34.25	15.5
69.25	27.5	61.25	74.5	29.25	51	30.25	56.25	67.5	78.25	60.75	101.25	46	68	63.75	27.75
53.5	12	27.75	36.5	3.25	15	14	16.25	65.5	60.75	32.5	98.25	23.75	29.75	34.75	18.5
50	13.5	31.75	48.75	14.25	23.5	19.25	26.5	38.25	60.5	29	82.25	24.75	47.5	34.25	18.75
57.75	14.25	36.25	40.5	11.25	28.25	11.25	30.25	60.75	62.75	34.5	94.25	29.5	44.5	40	16.75
57	23.75	56.5	67.75	25	44.5	16.25	51.25	66.5	67.25	43.25	83.75	38.25	46.75	57.5	24.75
44.75	17	19.25	32.5	8.25	9.75	10.25	11	41.5	66	22.75	98.75	13.75	33	23	15.75
54.75	26	40.75	47	18	27.25	16.5	35.5	23.25	60.5	28.75	90.5	27.5	64.25	39	18.25
39.75	19.25	40	48.75	14.25	29	12.5	36.5	41.75	70	34.75	97.75	31	29.75	46	13.25
47.25	13.75	38.5	49.25	15.5	27	10.5	36.5	45.5	73.75	36.25	104.5	26.5	44	41.5	19.5
35.75	15	24.75	40.5	9.75	18.25	13.5	24.5	28.25	60.5	23.5	85.5	17.5	37.25	27	15.75
56.75	15.5	21.5	40.75	6.25	18.5	13.5	17	48.75	82.75	31.75	108	19.5	51.5	24.25	21
58.5	25	62.25	64.5	34.25	49	20.5	59	42.75	65.5	51	88.25	41	47.25	61.25	22
69.75	30.25	61.5	55.75	27	33.75	24	45.25	81.5	66.75	49.5	82.5	33.25	63.25	46	35.25
52	12	9.5	32.5	4.25	10	13	9	42.75	56.25	16	96	14	34.5	14.5	15
44	16.5	16	36.75	9.5	14.5	13.5	13.25	25.25	53.25	20.25	91.75	17.75	35	23.75	13
53.75	31.5	57.5	62	28.75	42.75	26.5	54.75	60	63.5	47.25	76.75	36	53.75	53.5	38.75
49.75	28.5	40	53	12.25	23.5	17.75	30.25	48.75	54.75	28.5	67.25	18.75	42	31.75	22.75
48.5	25.5	31.5	52.75	9.75	19	17.25	22	71.5	52.75	34.5	71.25	19.75	40.75	22.75	30
40.25	13.75	18.5	34.25	2.5	13	20	7.25	116.25	72.5	30.75	80.75	18	21.5	23.5	35.75
31.75	12.5	17.5	36.25	2	10.5	9	12.25	38.75	42	19.75	48.5	11.75	27.5	14.25	18
64.25	20	29.25	42.75	3.25	12	17.75	14.75	99	58.5	33.5	90.25	22	55.25	25.5	31.25
57.5	12.25	12	38.75	5.5	14.75	16.25	10.75	42.75	59	25.5	97.25	19	48	24.75	15
53.5	18	26.75	45.75	14	18.75	17	25.75	88.5	60.75	28.5	65	21.75	49.75	26.25	26.25
56.5	19.75	24	40.25	11.75	17.5	16.75	17.25	80	66.25	29.75	82.5	24.5	40.75	28.5	21.75
63.25	14	23.5	37	5.25	17.75	15	19.75	81.25	64.25	32.75	94.5	22.25	47.75	28.25	20
52.75	21	35	49.75	9.5	15.25	17.75	21	83.25	61	41.75	79	16	37.5	23.5	28
32.25	15.75	26.25	41.25	6.75	12.5	18	20.25	70.5	44.5	36.5	70.75	19.25	38.75	26.75	26
43	21.75	20.75	39.5	3	10.5	16.5	14	84.5	49	32.25	81.25	12.75	63	28.25	22.25
58.5	10.25	8.75	29.25	3.5	9	9.5	9.5	30.5	52.25	19.25	97.75	16	40.5	16	21
37.5	12.75	25.25	36.5	7.75	17.75	18.25	20.75	39.5	52.5	21.25	103.75	17	54.75	22.5	19.5
59.75	21.75	32.75	50.5	14.25	26.25	19.75	33.5	65.75	60	35.5	97.5	27	56.25	38	28.5
64.75	19.75	28.5	47.75	6.25	15.5	17.5	25.75	80.5	62.75	34.5	85.75	23.75	62.75	28	26.25
48.25	16.5	24	39	4.5	16	15.25	19.75	73.75	67.25	32.5	88	18	45.5	28.25	22
52.25	15	18	33.75	4.75	12.25	13.75	16	39.75	64.75	25	96	14.5	45.5	24.25	19.75
41.5	14.75	17.5	40.75	8	13	13	15	38.75	64.25	27.5	90	13.25	42	22.75	21.75
55.5	17	24	36.5	6.5	13.25	13.75	21	65.25	61	31.5	87.5	14.5	56.5	24	22.5
47.25	17.5	25.25	42.75	17.75	12.75	18.5	14.25	55.5	53.25	30.75	69.75	18.25	41.5	24.25	15
70.5	14	26	40.5	8.5	11	17.75	16.25	85.75	53.5	33.5	97.75	16	63.75	23.25	24.25
57	19.25	19	37.75	4.25	10.25	16	15.75	87.25	50.5	33.5	84.25	16	51	24.5	28
40.25	23.25	28.75	40.75	7.75	14.75	19.25	23.75	46.25	33.5	30.5	48.75	11.75	33.75	17.75	30
31	24.75	26.75	49.25	8.5	22.5	20	25	61	33.5	24	50	15	26.5	18	26
39	34.25	17.5	48	5.75	15.25	17.5	23.5	65.5	40	28.5	56.5	14.5	40	19.5	27.75
41.75	36.25	22.25	48	10	10.5	14.25	21.5	65.25	30	21.5	40	15.5	29.75	16.75	19.5
40.75	27.25	26	51.75	4	16	14.25	17.75	70	35.75	22.25	51.5	16	29	16.75	25
44.5	23.75	24	35.25	2.5	14	20	20	70	63.75	24	75.5	13.75	35	16.5	30
37.5	12.75	22	36	1	12.5	14.5	14.75	86	64.5	25	70.75	16.75	32.25	20.25	26.25
32.5	21	32.25	41.5	1.5	12.25	21.5	14.25	68	55.75	20.5	62.75	16.25	25.75	12.5	22.5
46	18.5	28.75	30.25	1.75	11.25	13.5	19	82.75	57.25	23.25	62.75	20.25	33	16.5	29
40.5	28.5	23.5	44.25	4	14.25	15	15.25	68.25	38.75	23.75	49.25	15.5	23.5	12.5	27
31.5	20.5	13.5	33.75	3	6.75	13	19.75	66.75	47.75	24.5	60.25	14.25	30	17.75	28.75
36.75	12.75	15	36	1.25	6.75	11.5	16	64	49.5	19.5	73.25	13	33.5	15.5	33.25
30.25	10	16	29	5.25	8.5	11	11	68.75	57.75	18.25	87.75	13.25	30.25	19.5	23.25
29	10.25	14.25	27	3.5	7.25	9	9	68	61.25	20	74	11.25	38	13.75	23.25
32.25	9.5	19.75	24	2.25	6.75	11.75	12	69.25	57.5	19.5	92.5	9.25	36.5	16.5	21.75
29	10.75	12.25	23.75	2.75	4.25	10	14.5	59.5	53.5	19.5	75	10.75	29	14	22.5
30	10	12	27.75	4	6	13.25	11.25	58.75	50	15.5	101.75	7	28.75	16.5	18.75
30.75	10.75	13.25	24.75	2	6.25	10.25	13	56	64.5	17.5	81.75	10.75	29.25	15.5	19.5
26.5	8.5	13	23.75	1.75	5.25	7	10.5	48.75	47.25	12.75	80	9.5	21.5	13.25	17.75
30.25	14.75	16.5	29.75	0.75	8.5	11	13.5	63.25	43.75	18.25	99.25	9.75	29	13.25	19.25
30.25	10	11.5	30	3.5	8.75	13	9	57.25	55.75	17	81.25	8.75	28.5	12	19.5
44	15.25	28.75	34.5	3	6	14	19.75	65.25	50.75	32.25	89.5	12.5	39.75	21.75	19.25
54.75	14.75	31.25	35.75	5	13.75	13.25	21.75	31.5	63.5	26.25	109.75	17	57.5	34	19
53.75	20	34.25	40.25	11.25	25.75	19.25	28.5	61	80.75	30.5	110	26.25	58.25	35.75	29
45.75	15.5	38.75	38.25	3.25	19.5	10.5	21.25	53.5	69.75	24.5	76.75	15.75	57	26.5	25
37.25	12.75	30.75	28	0.75	10.25	11.75	11	63.25	60	20.25	56	14.5	40.75	17	21.5
38	14	23	26.25	2	7.5	8.25	20.25	54.75	62.75	17	78	9	53.25	15.25	19.75
46.75	16.75	17.25	27	2	7.75	9.75	13.5	52.5	56	22.5	75.5	11.75	47.5	14.75	17.25
41.5	15.5	20	34.25	0.25	9.75	12.5	16.75	68.75	65.5	21	64.75	11.75	53.25	11.25	20.25
55.5	13.25	18.25	28.75	1.5	7.75	10.5	12.5	46.75	65.75	19.25	84.25	9.25	46.75	12.75	20.75
41.75	8.25	19	28.25	0.25	6.75	10.25	11.5	57.75	55.25	26.5	54.5	9.75	36.5	12.75	18
41.25	13	16.25	23.75	0.75	7	9.5	11	42.5	58.75	18	69.75	6	38.25	11.5	14.75
40.75	12.25	23.25	21.75	0.75	7.5	16.25	9.25	74.25	57.5	25.25	87.5	6.25	49.5	12.5	20
35.75	18.5	17	32.5	2.25	10	13.25	18.5	57.25	53.75	22.5	83.25	10	35	20	24
42.25	12	15.5	25.25	1.5	8	15	14.25	50.75	52.5	23.25	79	9	40	10	25
44	19.75	16	33.25	2.25	10.75	18	18.5	61.25	66.75	36.75	96	16	44.75	15.5	31
41.25	17.25	16.25	25.25	1.5	5.75	8.5	15.5	49.5	66.25	21.5	70	8.5	46.5	12.5	19.75
50.75	14.75	20.75	31.5	0.75	16	13.75	12.5	43	56.25	25.75	98.25	11.5	47.25	14.25	20.25
53.75	18.25	19.25	37	1.75	16.25	19.25	20	68	54.75	29.25	108.75	12	55.25	16.75	23.25
52.25	20.5	20.5	41.75	2.5	14.25	18	19	65.5	44.5	31	90	11.5	57	16	24.25
35.5	13.5	18	30	0.5	9.5	10.5	16.5	59.25	71.75	25.25	97.25	11.5	45.25	13.5	25.25
43.75	14.5	20	28.5	1	7.5	12.25	12.5	54	60.25	22.25	72	7.25	56.75	13.5	22.25
47.25	17	13	32	0.75	13.25	12.25	15	61.75	51.5	20.25	75.5	12.5	32.25	13	25.75
32.25	13.75	12.75	30.75	0.5	9.5	10	18.25	45.5	47.75	19.25	74.75	10	35.25	13.25	18
36.5	17	10.25	39.75	0.5	12.25	13	10.5	47.25	43.5	21.5	51.25	10.75	25.5	14.25	24.5
39.25	16	18	30.75	2.25	9	15.75	12.25	91.25	69.25	25.75	70.25	11.75	24.5	13.75	33.25
45.75	9.5	20.25	24.75	1.5	7.75	10	11.25	67.25	64.75	20	78	12.25	46.5	10.5	24.75
34.75	8.5	28.25	30	1	9.25	11.75	8	56	45.75	17.75	52.5	11.25	28.5	14.25	19.25
34.5	17.25	26.75	35.25	1.5	13.25	12.75	18	76.25	53.75	22.75	65.75	11	31.5	15.75	28.25
45.5	16.5	27	31.5	1.5	7	15.75	10	95.5	57.75	27.5	74.5	11.75	43	14.25	32.5
37.75	13	12.25	31.75	0.25	8.75	9.5	15.75	39.25	48	20	63.5	10.5	32.5	10	18.5
26.75	11.25	12.5	26.75	1	7.75	6.25	14.25	44	40.25	20.5	59.75	11	28.75	17.25	16.5
36.5	13	18.75	20.5	0.5	5.5	8.5	11.25	67	52.25	14.5	82.5	11.5	36.5	14	20
44	13.75	17	24	0.5	11	13.5	12.25	64.25	49	13.25	74.5	11.75	27	8.75	19.75
44	19	31.75	38.75	6.5	15.75	15.75	23.5	84	54.75	27	67.5	15	35	24.75	23.5
33.75	10	22.25	28.25	0.5	6	9.25	13	65.5	59.25	23.5	54.5	14.75	31	13.25	18.25
46.5	6.5	21.5	23.75	0.75	7	6.5	12.75	60.5	59.25	18.5	87	10	53.25	11.75	26
41.75	5.5	22.5	21	0.5	4.75	11.5	13.5	48.25	62.5	23.5	55.5	7.5	40.75	13.25	21.75
40.75	14	17	29	0.5	7	14.5	10	47.75	36.75	18.75	46	10.75	27	8.75	18.75
40.75	18.75	15.25	34.75	1.5	10.5	17.75	13.5	52.75	38.75	19.25	41.25	11.5	30.5	16	20.75
35	16.5	15.5	34	1.75	10.75	15.25	15.75	56.5	37	16.5	43.75	12.75	29.75	15.25	20.5
40.75	13	13	38.25	0.75	7.75	13	17.5	43.75	35.25	16.5	46.25	10.75	33.5	14.75	17.75
43.25	17.5	24	36.25	3	10.25	18.5	18.75	75	42	26.25	50	14	31.5	17	24.5
45.75	15.25	23	29	3.25	7.5	14.75	13.75	76.5	46.25	16.5	67.5	14.5	33.25	21.25	20.25
24.25	12.5	19.5	22.5	4	3	12.5	5	89	54.5	15	57.75	16.25	31.5	18.25	17.5
26	10	19.75	28	0.25	7	13	6.25	110	44	19.5	44.25	18	32.5	18	23.75
35.75	19.75	16.75	34	2.25	14	11.5	19	76.75	49.5	22.5	59.5	16.75	28.5	15	29.5
34.5	16.75	20.5	32.25	1.5	12.25	10	16.75	69.25	41.5	21.75	52.5	19	26.75	21.5	31.5
29.5	14	24.5	29.5	1.25	10.25	10.25	15.25	52.5	46.75	16.5	58.75	14	36	11.75	18.5
42.75	21	29.5	38.25	1.75	12.5	17	15.25	47	46.25	24.25	66	13	36.5	21	26
33.5	19.5	24	32.5	1.25	12.75	15	13.5	93.25	50.5	28.75	61	11	37	17.25	22.25
34.25	15.5	39.25	34.25	1.25	17.75	11.25	19.5	50.5	44	19.75	69.25	12.75	39.25	17.5	22
36.75	19	19	35.75	1.5	9	14.25	14.5	53.25	36.5	22.5	42.25	14.5	28	13.25	17.75
48.75	11.5	18.5	27	3	7.5	18.25	18.5	64	36.75	18	57.25	16.5	33	18.75	17
38.75	14.25	10.25	33.5	0.75	7.5	18.25	14.25	71.5	44.5	17.5	48.25	14.5	38.5	14.75	21
31.25	13.75	9.25	32	1.25	12.5	14	13	57.25	42	18	57.5	15.5	32.25	15.5	16.75
36	17.75	13	31	1.75	10	15.5	17	56.5	38.25	15.25	50.75	15.25	36.75	15.5	20.5
38.75	14.5	17	28.75	0.25	6.75	16.75	13	89.25	44.25	16.25	60.75	16.5	33.5	17	21.25
31.75	11.75	13.75	38.25	0.5	9.75	15	13.25	63.5	34.5	13.5	46.75	12.75	29.25	13	20.75
31	13.5	13.75	33	2	9.5	9.75	17.5	62	38.5	19.5	55.75	12.75	40.75	14.5	19.25
61.75	16.5	22	34	2	11.25	15.75	14	80.5	47	34	91	13	58.75	18.75	25.75
41	26.75	25.5	41.25	3.25	15.25	16.25	20.25	54.25	45.5	27.75	67.5	14.5	28.5	21.5	23.75
41	12.75	22.25	30.5	0.5	8	13.75	16.75	70.75	42.5	17.25	48.25	14.25	31	18.5	16.25
53.5	19	17.5	35.75	1	8.25	13.5	11.75	69.25	50	25.5	79.25	14	57.5	16.75	22.5
48	10	22.5	29.75	3	11.75	14.25	19.25	43.75	53.5	32.5	95.75	13	40.75	29	17.5
45	21.25	30.5	42.75	3.5	19.75	16	29.5	48	47.75	29.75	63.75	17.75	29.5	30.25	16.5
28.25	14	8.75	23.75	0.75	7.75	7.75	15	38	48	19.75	70.75	8.25	34	18	19.75
26.75	12.5	16.5	21.75	1.75	7.75	8.75	10.75	39.75	39.75	18.25	61.5	9.5	26	14.25	21.75
32.75	9	16.75	29.75	2	6.5	10.5	12.25	55.75	40.75	15.75	70.5	10	32.5	12.75	18.5
35	18.5	23	33	3	11.5	14.75	17.75	43.5	33.25	17.25	88	12.5	31	14.5	15
29.5	10	13.75	24.75	0.25	4.75	10	8.5	41.25	31.25	12.5	77	8	40.5	14.5	13.5
37.5	11.75	27.5	33.25	2.5	10.75	14.5	12.75	49.25	43.25	21	81.25	17.25	40.25	18.75	14
50.5	23	29	27.75	2.25	12.25	19.75	16.25	71	53	25	77.75	13.75	39	15.5	25.25
46.25	22.5	23.5	33.5	3.75	11.25	20.25	12.25	54.25	53.75	25.25	69.75	11.75	32.5	17.25	24.25
40.75	28.75	12	37	1.25	12.5	19.75	19.5	71	40	24.5	42.5	11.5	35	15.25	13.5
51.75	21.75	18.5	37.25	1.5	13.5	17.5	23.5	93	41	26	49.25	12	28.5	12.75	20.75
53	28.5	23.25	37.25	2.75	9.5	15	15	71.25	44.75	23.75	65.75	6.25	32.75	15	17
27.5	12.75	6.75	21.25	3.25	6.75	7.5	10	6.75	24.25	7.75	25.5	3.75	17	3	5
19.75	10.75	6.25	22.5	2.5	7	9.5	10.5	8.25	23.25	4.75	21.75	2.75	12.75	8	7.75
19.5	15.25	7	24	1.75	8.75	7.25	9.75	21.5	27.25	11.25	26	5.25	9.75	8.75	8
39	11.75	17.5	21	2.25	6	15	8.5	54.5	39.5	16.25	54	7.25	35.5	9.5	18
20.25	7.75	15	13.5	0.75	4	11.75	7.75	26.5	45	14.75	41.5	6.75	18.5	5.75	13.25
19	26.5	11	26.75	1.75	12.25	9	18.5	22.25	23.5	12	19.5	5.25	14.25	6	6.75
22	12.25	3.25	19.25	1.25	9.5	8.25	6.75	19.75	23.75	10	21	4.5	15	6.5	8
19.5	13.75	6.5	23.5	3.25	9.5	6.25	10	23.5	30.25	8	32.75	6	12.25	7.25	12
18.75	10.5	7	16.75	1	6.5	7.5	10.25	23.25	15	9.5	25.5	7	15.25	6	7.5
19	23.25	10	24.25	2.5	12	7.75	11.5	31.75	30	9.5	23	4.75	7.25	4.5	5.75
32	12	12.5	18.75	0.75	3	10.5	6.5	23	43.5	10	52	7.75	24.75	3.25	14.5
23.25	8.5	9.25	14	0.25	3.25	8.5	4.75	9.5	31.5	6.25	23.5	4	12.5	3.75	10.5
18	10.25	3.5	20	0.5	7	7.5	7.75	20.5	32.5	5.75	19.25	3	14.75	8.75	7.75
15	20.25	9.5	18.25	2.5	12	6	9.5	40.25	25.75	10	28.75	6.25	15.25	5.25	8.75
16.75	16	9.25	15.5	4	11.25	6.25	8.25	28.25	27.75	8.75	26	2.75	15	6	9
20.25	8	6.25	11	5.25	8	4	6.5	22.5	25	3	29	2.25	17.5	5.5	5
15.75	13.75	5.75	11.75	2.25	8	3.75	5	33.25	28.5	5	20.75	3	9.25	5.75	7
21.5	8.25	7.5	16.75	3.25	7.75	10.5	4.25	29.25	28.75	9	17.75	5	9	3.75	9.75
40	28.5	29.5	32.25	7.25	14	18.75	21	64.25	22.5	20.5	42	12.5	10.25	16	19
49.25	20.5	31.25	32.75	0.5	14.25	19.25	18.75	68.5	31	27.75	59.5	13.75	13	15.5	21.25
38.25	29.75	17	35	1.25	7.75	18.5	13	35	28.5	16	49.25	7.75	13	9	9.25
31.75	19.25	11.5	29.5	1.75	7.5	9.75	13	21.75	29.25	6	30.5	5	13.75	7	5.25
25.25	15.25	1.75	22.25	0.25	5.75	9	9.25	9.5	34.75	3	29.5	2.75	13.25	7	4.25
25	12.5	5.5	28.5	0.25	4.25	12.5	7	9.5	27.75	6.75	26.5	5.25	21.75	8.5	8.75
42	25.5	26	38	4.75	16.75	14	23	45.75	27.25	18.5	43	7.5	21.25	18.25	17.25
54.75	24.5	26.5	62.25	1.75	14.75	18	36.5	57.25	38.5	24.25	54.5	12	28.5	18.5	14.25
42.5	22.25	15.25	42.5	4	13	17.75	18.25	43.75	35.75	16.25	44.75	10.75	26	10	14.5
35	18.25	8.75	39.5	3.25	6.25	13.5	7	24.5	31.25	8.5	35.25	6	17.25	6.5	10.25
34.75	25.75	20.25	40.5	3.25	19.75	15.25	22.5	57.5	30.5	18.5	42.5	11.75	17	16.5	15.75
43.5	26.5	20.75	44.25	2.75	18.25	9.5	30.75	51.5	40	19.5	53.25	9.25	17.75	12.5	15.25
44.5	30.5	26.5	36.75	3.5	14	11.25	26.75	51.75	39	21.75	56.25	10.25	25.25	20.25	11.5
44.25	25.75	14.25	49.25	2.5	16.25	7.75	29.25	40	34.25	17	45.75	7.75	15.25	10.75	8.75
39.75	14.75	11.75	40.5	2.5	11	11.5	21	28.25	34.5	12.75	43.25	8.25	19.25	13.5	14.25
39.5	17	17	36.25	4.5	11	10	20.5	29.25	31.25	11	33.75	7.5	17.75	11.5	14.25
38.75	13.75	19.5	33.5	5.25	9	13.25	26.5	56.5	36	23.25	51	9.75	26	15.75	15.25
32	12.5	15.75	39.75	5	9.5	8	22.5	38	37	10.25	24.75	7.75	16	9	8.5
33.25	13.5	10.75	33	1.75	11.25	9.75	15.25	20.25	33.5	7	22	6.75	20	9.25	7.25
41.25	17.75	27.5	42.75	7.25	16.75	15.25	27.75	46.25	48.25	21.75	56	13	24.75	13.75	15.5
30.75	10.25	10	18.25	3.75	7.25	8.25	15.5	25	46.75	12	35.25	8.5	19.25	11.75	8
22.25	10.5	6.75	16.75	2.75	4.25	10	6.75	17.75	27.5	8.25	34.5	4	16.5	10.5	6.75
14.25	8.5	9.25	16	1	4.25	4.5	5.25	10.75	36.5	9	23	3.25	12.25	4.5	5.5
34.5	16	18	31.25	6.75	11.75	16.25	17.5	31	43.75	17.5	45.75	4.75	29.75	11	10.25
59.75	10.75	23.75	31	3.5	7.25	10.25	14.75	36.75	65.75	19.75	92.75	11.75	31	21.5	23.25
44.75	11.75	24.25	29.25	3.5	15.75	15.25	18.75	32.5	64.5	18.5	78.75	12.75	33.5	21.25	17.25
41.5	7	25	29	1.75	6.5	12.25	18.5	37.5	63	25.75	97	11.5	27	23.75	21.5
32.5	16.5	43.25	52.25	16.75	35.75	18.5	49.75	25.25	73.75	32.5	74.75	31.25	20.75	51	12.75
60.75	16	32.75	38.25	12	16.75	15.5	19	44.5	73.75	29.75	105.5	17.5	38.25	30.5	19.25
46	12	40.25	36	8	13.5	11.5	25	24.5	62.5	25.75	89.5	16	38.5	32.75	15.5
47.25	11.75	27.5	37.25	7	17	12.75	20.25	38.25	67.25	24	91.25	14	35.25	24.75	18
40.75	14.75	36.5	40.75	9.25	20.25	12.25	29.25	26.75	63.5	25.25	76.5	18.5	37.25	32.75	15.25
52.75	14	41.25	44.75	15.5	25	10.25	37.25	37	60.25	26.5	77	20	40.5	36.75	17
47.25	12.5	41	40.75	16	29.25	14.75	45.75	20	62	31.25	89.25	24	32.75	38.5	13.5
47.25	11.5	16.25	31.25	7	10.75	11.75	17.75	30	49.5	18	99.25	14	29.5	24.75	11.25
49.25	12.25	52.75	47.75	20	33.75	16	52.75	18.75	57.75	30.5	84.5	24.25	29.5	49	12.75
27.75	11.75	10	21.75	1.5	5.25	9.25	12.75	31.25	40.5	16.25	100.5	8.5	27.25	18.75	12.25
54.5	21	43.5	52.25	15.75	29.25	23.5	46.5	49.25	65.25	34.5	95.25	24	39	46	17
40.25	15.75	39.25	44	15.75	26.25	18.5	43.75	38.75	62.5	24.75	75.25	17.75	30	35.25	13.25
64.25	23.25	46.25	53	31.25	30.75	17	46.5	56.75	63.25	45.75	96.5	30	63	48.5	20.5
50.75	9.75	22.25	24	4	5.5	14.25	15	22.75	44.75	17.25	98.5	12.25	52	20	13.25
58.25	16.25	48.75	46.25	17.25	35	18.5	48.5	21	51.5	31.25	80.75	25.5	51.5	38.5	12.5
49.5	14.5	53.75	52.25	26.25	34.75	16.75	56.5	25.25	54.5	32	57.75	31	35.5	55	12.75
49	8.25	32.75	32.5	11	22.5	13.25	36.75	26	63	32.75	91.25	21	34.5	36.5	18.75
30	20.25	47.25	45.25	16.25	32.25	10.75	53.25	18	50	27.5	60.5	26	24.25	45.5	13.25
43.75	17.5	29.5	37.25	10	13.75	10.5	24.25	33.5	57.75	24	98.5	11.75	37.5	28.25	21
42.75	10.75	30	34	10.5	16.25	10.25	26	42.25	59.75	28.75	79.25	16.75	26.25	32.5	15.5
23.25	9.25	13.5	23	2	5.5	9	10.75	27.25	60.5	15.25	70.75	7.25	20.75	14.5	13
39.75	19.75	58.75	48.5	21.5	42	15.75	59	22.5	77.5	36.5	85.75	33	35.5	54.75	14
44.75	11.75	27.5	33	9.25	16	11.75	26	31.75	63.25	27.5	86.25	13.5	35.75	30	17
40.5	12	27.5	35.5	12.5	23.5	12.75	34.5	21.75	61.5	29.75	85.25	22	32.5	35.25	16.5
45.5	20.5	54	38	19.25	38.25	14.5	57.5	27.5	53.75	35.25	68.75	28.75	30.75	47.25	15
45.75	12.25	33	33.5	12.75	20	9.5	36.25	37.75	67.75	29.75	77.75	21.25	30	35.75	17.25
47.75	15	36.25	32.25	12.5	18	12.5	30.75	32.5	64	30	84.25	18.25	38	36.5	16
39.25	12.75	27.75	29.75	8.5	14	10.25	25.25	36.75	58	22.5	81.75	17	33.75	27.5	16.25
45.75	14.5	48	45.5	22.25	30.25	9.5	54	25.5	53.75	33	65.75	29.25	25.75	45	14
49.25	22	35.5	56.5	28.25	31	20.75	49.5	52.5	50.75	32.5	72.5	21.75	35	35.75	16.5
44.75	27	49.25	56.25	20	32.75	23.5	48.5	50.75	54.75	36	51	27.75	37	42.5	18
63	25.5	30.5	45.5	9	22.25	18.5	39.5	60.25	45	28	79.75	16.75	40	26.5	19.75
63.5	27.5	54	54	17.5	30.5	20.75	42.5	63	49	35.5	76.5	24.25	61.5	40.75	21.5
73.75	15.5	38	43.25	9.25	26	20	30	101	69.5	41	86	22.75	65.5	41.5	26.5
57.5	24.25	40.25	55.75	16.75	28.25	19.75	43.5	62	47.5	30.75	81.75	24	41.75	39.5	16.25
48.75	24.25	58	56.75	21	42.25	21	62.75	37.25	59.5	35	65	33.5	38.25	55.75	15.75
38	33	37.75	40.75	11.25	16.25	17.5	33.25	74	45.5	27.75	84.25	14.5	34.75	26	16.5
20.5	12	15	19.75	1.5	6.5	13	14.5	13.75	39.75	7.5	28.75	4.75	14.5	7	5.5
22	9.5	6	18.5	0.75	6.5	9	7.5	12.25	30.25	12.25	20.75	3.5	11	8.5	4.5
17	10.5	10.25	18	0.75	6.5	10.75	13.25	12	33	9.5	21	3	16.75	4.75	7
14.25	14.5	3.25	22.5	1.5	6.75	7	11.75	18.5	29.5	10.5	19	4.25	9.75	9.75	7.25
17.5	9.5	7.5	15	1	2.5	8.5	7.75	31.75	34.25	8.75	27	3.5	15	4.25	15.75
16.75	16.5	4	12	2.25	6	8.25	12.5	29	32.75	11.5	31.25	4.75	21.25	6	8.25
22.25	11.75	8	16.75	0.75	11.75	10	8.75	29	27.75	13.25	31.25	5.25	18	5	10.25
10.75	10.75	2.5	14.25	0.5	5.25	7.5	6.25	18	24	4.5	19.75	3.25	14.75	7.5	5
14	10.5	5.75	13.25	1	7	5.5	12.75	21.75	26	6	16	1.25	20	5.25	7.75
31.5	22.5	28.25	29.25	6.5	19.75	21	25	31	30	19.25	40	13.75	19.25	22.75	12.5
44.5	34.75	54	52.5	10.75	28.25	17.5	42	29.75	55.25	30	91.25	19.5	32.75	37.75	14.75
20.25	8.75	6.5	14.5	1.25	2.5	4.75	5.75	11.25	37.25	6.5	28.25	2	14.25	4.75	5.5
29.5	12.75	7.5	13.25	1	5.5	7.75	6.5	21.5	33	5.25	33.5	2.25	23.75	5.25	7
19.25	8	6	15.5	1	6	5.5	5.75	10.25	41.5	5.75	16.75	2.75	13	7.75	6.5
20	12.5	5.75	16	0	11.25	8.25	6.25	13	32.5	8.5	29.75	2	14.75	8	4.5
11.75	6.25	7.25	14	1.25	4.5	4.5	7.5	25	25.5	8.75	24.75	5.75	11	5.25	9
19	11.5	4.25	16.25	0.75	9.5	5	8.25	21.5	27.5	4.25	26	3	11.5	3.25	7.25
13	10.75	1.5	14.75	2	7.75	3.75	10.25	15	25.5	5.25	21	1.75	12.25	8	6
16.5	14	9.5	15.25	1	5	5.5	10.25	42.25	33	11	36.75	4	12	4.5	7.75
24	11.75	18.25	15.5	4.5	11.75	7	10.25	43.25	31.75	11.75	29.5	3.5	15.5	6	8.5
21.75	6.5	4	10.5	0.75	7	5.75	7	20.25	25.5	6.25	23.75	1.75	15.75	4.25	5.25
16	5.25	7	12.75	1.25	4.75	6	7	9.25	24.75	6.75	20.75	1.75	9.5	4	6
11.25	8.5	2.25	15.75	0.75	4	6.5	5.75	6.25	29.75	5.75	23.25	1.75	12.5	2.75	4.5
16.75	4.25	8.25	6.75	2.25	6.5	4.5	4.75	27.75	20	7.75	20	3.75	10.75	4.25	8
17.5	13.25	8	14.75	1	10	6.25	12.25	40	43	4.75	26.75	5.25	12	4	7.5
26.5	11.5	6	17.25	3.75	4.75	6.75	10.5	25.5	24.75	5.75	27.75	3	15.75	4.5	9.5
18.5	13.75	5.75	18.25	1.25	11.75	5.25	8	16.25	26.75	7.75	25.25	1.75	14	4	5.25
28.25	10.25	11.5	12.5	2	7.25	8.75	8.75	27.25	29	11.75	31.25	4.25	19.5	5.25	6.75
19.75	8.25	4.25	9.25	0	3.5	5	4.25	11	24.75	3.5	22	2.25	14	2	4.75
16.75	5.25	3	12	0.5	2.5	4.75	6.25	16.5	25	4.75	29.75	1.5	10.25	3.5	6.25
15.5	17.75	4	15.25	2.25	6.75	5	13.25	26	23	4	21.75	3.5	8.5	4.25	6.25
20	10	9.5	15.25	2.5	6	5.75	5.25	27	30.25	7.5	30	1.5	14	3	6.5
16	9	6.5	11.5	2	8	8	8.75	26.5	25	5	19	2.25	13	4	8.25
23.5	14.75	9	17	2.5	11	5.25	10.5	27.75	34	12.5	32	5.75	18.75	5.5	9.25
32.25	8.25	9	13.75	0.25	3.25	5.25	5.75	39.25	29.25	12	33.75	3.75	21.5	3.75	13.25
16.75	7	8.5	6	2	4	5.75	5.5	24.75	18	6.75	25.25	3.5	17.25	3	5.25
27.5	3.5	13	10.5	0.75	3	5.25	5.5	11.5	30.5	8	34.5	2.25	11	2	7.5
22.5	6.75	11.75	12.25	0.75	2.75	5.25	6	6.25	22.5	4.75	25.25	2.75	16	4	5.75
14.75	3.75	3.25	5.75	0.75	2.25	4.75	1.75	8.5	24.25	4.25	14.75	1	10.5	4.5	6.5
20	13.75	5.75	19.5	2.5	8.25	7.75	13	36	26.5	11.5	25.25	2.5	13.5	5.5	8.25
24.75	12.5	10.5	16	2	6.25	4	7.25	31	32.75	5.25	39.25	2.25	15.5	4.5	6.75
10.5	12.5	8.5	13.75	2.5	6.25	6	8.25	35	26.25	10.25	16.75	4.5	10	3.25	8.25
27.25	18.5	3.75	19	1.5	9	4.25	9.75	30.5	24	6.25	22	2	19.25	3.25	10.25
18.25	15.25	2.75	17.5	1.5	7.5	3.5	7.75	19.75	26.5	5.75	21.5	1.25	14.75	2.75	7
30.5	8.75	8.25	13.5	1	7.5	2.5	5.75	28.75	28.75	6.75	30.75	1.5	21	3	9
25.5	5.5	5.25	10.5	2.5	5.5	6.25	5.5	26.5	28	7.75	37.75	1.5	11.5	2.25	9.5
18.75	6.25	5.5	11.75	1.5	6	5.75	6	11.25	28	4	25.5	2.75	9.5	4	3.75
10.25	7.25	4.25	12.75	1.25	3.5	5.5	2.75	13	14.75	2.5	14	1.25	10.25	1.25	3.75
20.75	7.25	7.75	10.5	1.5	6.75	2.75	6.75	18.5	20.5	5	22	2.5	13.5	2.25	5.25
15.5	9	5.25	10.5	1.25	4.75	4.75	9.25	23	23	3.25	19.75	2.5	12.25	2.75	8.25
16.75	7.75	10	15.75	2	8.25	4.75	7.5	25.5	21.5	6	23.75	1.5	10.25	4.5	6.5
23.5	12.75	5	14	1.25	8	3.5	9.25	28	30.75	5	34.25	2	18.25	4.75	7.5
18.25	11.5	4.75	12.75	1.25	9.75	3.75	7	16.25	22.5	3	20.5	2	8	2	5.25
22.5	13	3.5	13.75	2.5	4.25	3	6	42	25.75	4	23.5	2.25	17.5	4.25	6.5
24	11.25	13.5	15.25	3	7.5	5	10.75	28.25	33.75	8.5	33.5	2	14.25	4.25	11.5
16	7.75	12.25	10.5	1.75	7.5	4	10.25	24.75	28	5.25	39	3.75	20.75	4.75	5.75
20	13.75	10.5	14.75	1.25	7	4	7.25	33.25	33.25	7.5	31	5.5	17.25	2.25	7.75
25	12.25	13.25	10.75	1	5.75	4.5	6.5	38.5	28.25	6	27.5	2.25	18.75	4.5	9.25
28	5.5	8.25	13.25	1.75	5.5	5.5	10	24.25	27.25	7	44.5	2.75	23.5	4.75	8.25
25	10	7.5	12	2	6	6.75	4.5	30.25	28.5	10.75	35.5	3	15.75	2.75	9.5
10.5	8.5	7.75	14.5	3.25	7.5	6.5	7.75	26	27.75	6.5	25.75	4	12.75	4	8.5
26.75	9	11	12.25	1.25	7.5	5	6.25	37	27.75	7	31	2.25	17.75	2.5	8.5
16.25	10.75	12.25	10.75	2.5	6.5	5	7	40	30	10.25	36.75	2.5	12.25	2.5	7
15.5	7.75	10	7.5	1.25	3.5	5.75	3.75	14.5	23	2.25	23.75	1.75	13.5	3.75	5.5
18.25	4	5.75	9	3.25	4.5	5.25	3.75	15.25	20.25	5.25	12	3.75	11	3	2.75
21.75	14.25	4	13	1.5	7	4.25	11.5	35.5	19.5	8.5	23	2	11.25	2.5	7.75
17.25	5.5	8.25	11.25	1.25	3.75	6.5	2.75	23	21.25	6.25	22	3	12.25	3.25	6.75
10.5	4.75	4	8	2	5.25	5.25	5.5	16.25	21.25	3.25	12.75	2	11	4.25	3.75
18.75	12.25	11	12.25	1.25	7	4	4.5	40	26.25	7	21.5	3.75	18	3.75	6.25
20.75	12.5	7.5	16	4	7.25	4.75	9.75	30.5	32	6.25	22.5	2.25	10.75	3	6
26.5	13.25	9.25	12.5	2.25	5	3.75	8.5	30.75	32.75	5.25	35.5	2.25	16.25	2	6.25
16.5	2.75	7	4.25	1.75	0.75	2.75	1.75	29	28.25	4.75	24.5	1.75	21.5	1.25	6.25
16.75	7.75	5	9.25	2.25	6.75	4.75	6	24	13	5.25	18.75	2.5	11	3.75	7.75
17.5	7.75	6.25	9.75	2	2.5	2.75	4.25	28.75	25.25	4.75	26.25	1	11.25	1.75	6.25
19.75	9.25	5.5	11	1.75	4.25	5.25	7.25	29.5	23	6.5	22	2.5	9.5	7.75	7
18	15	8.75	14.75	3	8	4.5	6.25	31.5	24.25	3	14.25	3	6.5	4.75	7.75
18.25	14.25	9.5	12.75	0.5	6.25	4.75	8	38.25	23.25	5.5	23.75	2.75	18.25	3	8
20.75	8.75	15.5	11.75	2.25	6	3.25	4.75	40.25	40.25	5	43.25	2.5	24.75	4	6.25
31.5	12	12	12.25	1.25	5.25	4.5	5.5	26	24.5	7.75	26	2.75	16.25	5.25	8.75
19.5	7	6.25	11.5	1.75	7.75	7.75	4.25	28	19.75	6.5	25.5	4	15.75	4.25	8.75
30.75	22.75	18.25	21	0.75	13.75	13.25	15	17.5	18.75	6.75	18.25	2.75	6.75	7.25	6.25
46	25.5	22.75	25.75	0.5	12	13.5	12	36.75	25.25	18.75	50	5.75	17.25	16.5	10.75
48.75	28.25	32.5	34.75	2.5	10.25	15.5	13.25	26.5	26.25	17.75	40	5	15.5	15.75	11
42.25	18.75	24.75	32.5	0.25	9	14.5	11.25	33	19.25	16.25	37.5	9.25	13.5	13.25	9.75
60.75	13.25	30	33.25	1.25	5.75	15.75	19.25	34.25	42.5	21.25	66.5	6.5	22.5	17.25	14.25
28.25	3.25	11	10.5	0	1.25	11	5.25	9	21.5	5.25	26.75	3.5	14.75	8.75	8.75
17.25	6.5	7	9.5	0	2	7.75	3.75	11.25	24.5	5	24	2.75	22.75	6.25	4.75
24	7.25	9.25	9.25	0.75	3.25	7.25	5.25	21	21.75	8.25	31.5	2	15.25	4	5
23.25	4.5	3.25	15.75	0.25	4.5	4.5	6.25	13	23.25	5.75	26.75	1	12.25	8.75	4.25
21.25	7	8.5	12.25	0.5	4	8.25	6.25	14	25.75	6.25	26.5	2.25	13.25	4.75	5.25
24.25	20.5	6.75	14	2.5	6.5	3.75	10.75	26.5	21.75	5.5	26.75	3.25	10.75	5.5	5
24.25	6.25	9.25	9.75	0.75	3.75	5.25	4.75	22	29.75	6.5	40	3.25	14.25	2.25	7.75
14.75	7.5	6.75	9.75	0.5	4.75	6.5	4.5	20.5	28.25	4.5	28.25	1.5	15	4.5	4.5
17	5	6	12.75	1.25	4.5	6.25	4.25	27	26.5	6.5	25.25	1.75	14.75	4.75	7.25
20	8.5	9	13.75	2.75	7.25	3.75	10.75	37.75	22.5	6.75	23	3.75	7.5	3.75	6.75
20.75	6	10.5	10	1	6.75	5.25	6.5	41.75	30	6.75	27	3.5	16.5	3.5	12.25
16	9.25	6.25	11.5	0.5	4	3.5	7.5	34	20.75	6.25	24.75	1.75	11	4.5	9.25
17.5	6.75	11	10	1	5.75	4.75	8.25	34.75	30.25	10	32.25	3.5	11.25	2.5	6
15.5	4.75	8.75	10.25	0.25	3.25	5.75	4.75	22.5	29.25	5.5	26.5	2	20.25	4.25	6.5
25	5	7.75	11.5	1.75	5	4.75	7.25	26.5	25	5.5	28.75	2.5	13.25	2.75	5.25
25	12.25	7	14.5	3	5.25	3.75	8.25	40.75	24.5	7	19.25	2.5	16.25	2.25	7.25
17.5	15.75	7.5	19.5	0.75	11.75	3	5.25	17.25	19.25	4.75	27	1.75	10	3	5.75
14.5	5.75	6	12.25	1.25	4	2.75	6.25	26.5	15.5	5.25	20	2.5	10.5	5.5	4.5
19.5	9	6.25	12.25	1.25	6.5	4.75	7.5	18.25	19.25	4	20	1.25	10.5	3.75	5
19	7.5	6	10	1.75	5.5	2.75	5	41.5	28.75	5	34.25	2.5	16	4	7.75
14.25	16.5	5.75	12.5	0.75	11.25	6.25	12	16.25	30	5.5	21.75	0.75	10.25	2.75	4.75
17.25	5.5	8.5	8	0.5	4.5	2.5	3	33.75	20.25	5	23.75	2.5	14.75	3	7.25
11	5.25	6.75	11.25	2	4.75	4.25	4	31	16	6.5	15.25	2	7	3	5
15.5	5.5	4.75	9.25	0.5	3.75	3	3.75	25	27	4	15.75	1.5	15.75	1.75	4.5
19.5	4.75	8	9.75	0.75	2.5	5.75	4.25	23	22.25	4.25	21.5	3.75	6.5	2.75	5.5
15.5	3.25	7	7.5	1.25	4.25	9	3.25	12.5	20.75	2.75	17.5	1.25	12.25	3.75	3
19.75	10.5	4.5	11	1	6.25	4.75	8	38.25	15.5	5.5	33.75	2.75	18.25	5.75	8
19	8.25	19.25	8.5	0.5	5.5	3.25	8.75	46.75	19.75	6.75	28.25	2	18.25	2	6.5
23	13.25	12.5	15.75	3.75	10.25	4.25	10.5	20.25	32.75	6.5	31.5	2.75	8	2	6.5
27.5	12	8.25	14.75	1.25	6.75	5	10.5	32	41.25	5	35	1.5	15.25	3	7
32	11	7	12	1	5	4.25	7.25	31.75	29	3.75	24.25	1.5	11.25	2.75	5.5
25	6.75	7.25	9.5	2.5	3.75	4.25	4.5	23	19.75	5.25	28.75	2.5	23	2	10.25
12.5	4	3.75	6.25	0.25	1.75	2.5	4.25	21.75	15.5	5.5	16.25	2	7.5	5.5	3.75
17	9.25	6.5	8.25	2.5	3.75	3.25	6.25	27.5	24	6.25	24	2.5	11.75	3.75	7
17.75	6.5	9	9.25	2	3.5	3.5	5.75	40.75	23.25	6	26.25	2	11	4	6.5
16.75	9.75	8.75	11	1.5	6.5	6	8.5	27.75	20.25	4	21.5	2.75	11	2.25	3.75
17	8.25	6.25	12	2	4	4.75	5	22	26.75	7.75	23.25	1.75	14.75	3.5	7
16.75	4	7.25	7.25	1.5	3	4.5	4.25	10.75	15.75	6	25.75	1.75	14	4	6.5
24.5	6.5	12.5	11	0.25	3	5	7	10.5	19.5	2.75	22.25	3	12.75	3.25	5.25
17.25	4	8.5	10	0.5	2.25	3.5	11.75	9.5	12.75	5	13.75	2.5	13	9	4.5
17.25	5.5	4	9.25	0	5.75	4	4.5	20.75	18.5	4.5	23	1.25	16	3	4
17.5	5	4.5	10	1	3	4.25	5.25	15	18.25	5.5	17.75	1.5	15.25	2.5	4.25
19.5	5	5	7.75	2	4.75	5.75	3.75	11.5	24	2.75	27.75	1	14.75	3	2.75
16.25	3	4.25	6	1.25	3.75	2.75	5.5	24.75	24.75	3.75	26.25	1.75	17.5	2	5.25
20.75	5.75	10.25	12.75	1	3	3.25	4	24.5	16	3.75	21.5	1.75	11.5	3.75	6
16.5	7	6.5	13.75	0.25	4	6	4.5	20.25	23	4.75	25.75	1.75	12.25	4.5	4.5
23	8.5	10.25	13.25	1.5	3.75	3	6.75	34.5	30.75	7.25	27.75	0.75	6.25	4.75	7.5
20.5	8.25	10.5	11.5	1	8	3.25	7.5	26.5	20.75	5.25	21.5	1.75	10.75	2	7
17	4.75	9	8	2	5.5	4.25	3	46.25	24.5	8	21.5	2.5	10.75	3	4.25
19.5	10.25	8	14.75	0.75	5.75	5.75	5.25	33.5	21.75	5.25	28.5	1.75	10.25	3.25	7.75
15	9.5	9.75	12.75	0.5	7.25	3.5	8	30.5	21.5	5	18.75	1.5	9	2.5	5.75
26	12	9.5	12.25	3.5	8.75	4.75	11.5	35	30	8.25	40	2.5	17.75	2.25	9.75
18.75	7.75	8.25	12.5	3.25	4	3.75	6	46.75	25.5	4.5	41.5	1	14	2.5	4.5
15.75	5.25	6.5	7.25	0.5	7.25	3	6.25	24.5	23	4.5	21.75	1.25	16	2.75	8
13	12	10.25	13.25	2.5	5.5	3.75	7	19.5	18.25	6.5	15.25	2.5	12	3.75	7.5
18.5	9	12	12.75	1	6	2	4.75	28.75	26.5	3.5	28	2.25	14.25	2.75	5
17	12.5	4	9	2.25	8	4.25	7.25	26	20	4	24.75	1.5	10.25	2	7
23.5	5.25	8.25	10	0.5	6.75	5.75	5	37.5	32.75	6.5	37.5	2.25	19.5	2.75	8.25
30.75	9.25	9.5	12	1.25	6	4.75	7	28.25	21	5.25	29.5	2.5	14.5	3	6.25
30	6.25	9.5	10.25	1	5	4.75	5.5	37.5	26.5	6.75	42.75	1	24.75	2.25	8.25
17	9.75	11	10.25	2.5	6	4.5	6.25	29.75	28.75	11	37.75	3.75	15.75	4.75	7
21.5	10.5	12.75	12.25	1.25	6	3.5	7	22.75	23	6.75	30.75	2.5	12.75	1	5.5
23.75	4.75	6	12.25	1.25	4.5	2.75	4.5	19.75	26.25	3.25	43.5	0.5	18.5	3.25	6.25
25.5	5	17.25	11.5	1.25	5.25	7.5	5	22	30.25	8	37.75	2.25	22	5.75	16
15	7	9.5	15	1	4.75	4.5	10.25	47.75	24	6.5	30.25	1.25	14	3.75	7.25
28.75	9.25	17.25	12.25	1.25	5.5	4	6.75	36.5	26.75	6.75	33.25	1.75	15.5	1.25	12
21.5	3.25	6.5	19	1.5	2.5	6.5	6	15.25	23.25	5	29.75	2.5	17.75	4.25	5.5
19.75	1.5	6.75	14.5	1.75	2.5	3.5	1.75	30.25	20.5	7.25	32.5	1.5	17.25	3.5	6.5
18	4.5	6.5	7	0.25	3.75	4.5	3.5	29	17.5	7.25	20.75	1.75	13	1.5	5.75
19	4.25	6.75	6.25	0.75	1.75	5	6.75	5.25	19.5	4.5	22	1.75	11.25	4.75	4
12.75	7.25	6	8.5	1	4.25	3.75	6.25	37.25	18.25	9.5	20.75	1.25	8.5	2.5	5.75
17.5	5.75	7.75	10.5	2.75	4.25	6.25	6.75	23.5	25.5	7	19.75	3.75	7	4.25	5
23	5	4.75	10.75	2.25	4.25	3	5.25	32.25	20.5	4.5	29	1.5	18	4.25	8
17.25	3.25	9.5	10.25	1.5	4.25	4.75	2.75	32	18.5	2.75	16.75	0.75	10.25	2.75	4
11	5.25	7	11	0.75	4.75	5.75	5	30.25	17.75	4.5	21.5	1.25	16	3	5.25
26.5	10	9.75	12.25	3.25	5.75	4.75	7.25	34.25	24.5	8.75	29	1.75	16.5	4	9.5
18.5	10	9.5	12.25	1.75	8.25	2	7.75	34.25	16.75	5	17.5	1.5	10	1.5	5.75
20	10.75	16.75	16.75	1	5.75	4.25	5	23.75	27	4.75	35.75	0.5	19.5	2	4.5
24	10.75	7.75	11	1.75	5.75	3.25	5.75	24.5	27.75	5.25	29.5	0.5	14	5.5	7
21.25	9.5	12.75	8.75	0.75	4.5	4.25	3.5	42.75	25.25	4	26.75	2.75	10	4	7.75
10.75	10.25	5.5	13.25	1.25	4.75	4.5	8.5	22.75	23.25	3.75	26.25	1.25	13.25	2	6.5
19	7.25	11.5	7	1.75	2.5	4.75	7.5	7.25	20.25	3	22.75	1	13.5	2	8.25
12.5	3.25	2.75	7.25	0.5	2.5	2.75	6	13.5	15	1	12.25	1.25	11.25	3.5	1.5
14	7.25	8.75	10	1.5	5	6	3.25	38.25	16.75	5.25	16.5	3	10.25	1.5	6.5
14.75	8	5.5	11.25	0.75	5	6	6.5	24.25	17.75	7.5	18.75	3.25	9.5	1.75	5
19	10.25	11.25	10.25	0.5	6.75	5.25	4.75	40	24.5	2.75	29.5	1.25	22	2.75	8.25
14.25	11.25	8.5	11.5	1.25	5.5	4.75	7	36.5	24.5	8	21	3.25	12.5	5.75	5
28.25	4.5	11.75	9.75	0.75	2.5	4.5	4.75	24.5	27.25	4.75	26.5	0.75	12.5	2.5	6.5
14.25	5	6.5	8.5	2	3.75	1.5	3.5	32.5	17.5	6.25	26.25	2.25	11.75	3.25	6.75
19.75	7.5	8.75	8.5	1.5	4.75	6.5	3.75	31.25	20.5	3.75	18	1	10.25	2.5	6.5
16.25	2.25	1.5	10.5	0.25	1.75	2.75	6	7.5	23.5	4.75	17	1.5	10.25	3.75	2.5
22.75	4.25	4	8.75	1.5	2.5	7.5	3.5	27.25	28.5	4.5	23.5	2.25	15.25	4	6
13	4.5	5.75	10	1.25	3.75	6.75	4.25	21	21.25	4.25	24.5	0.75	6.75	2.25	5.75
23	9.5	12.5	11.75	1.75	10.25	3	11.5	27.25	23.75	6	26.25	2.75	13.25	2.5	9.5
20.75	9	11.75	13.75	2.75	5.25	2.5	6.75	25.75	22.75	6.25	32.75	2.5	14.25	2.25	9
24.5	9.25	14	10.5	2.25	3.75	3.5	8.25	28.75	27.25	7.25	27.25	2.5	12.75	4.5	6
21.25	8	11.25	12	2.75	5.5	4.5	7.5	20	22.25	7	33.5	2.75	15.75	2.75	4.25
18.75	4	11	9	1	2.5	2.75	0.75	24	17.75	4.75	29	2.5	10.75	0.75	8.25
12.75	8.75	7.75	9.25	1.75	3.25	4.25	6.75	25.75	16.5	2	18.75	0.5	11.75	2.25	5.25
16.75	2.5	6.75	10.25	2	3.25	4.75	1.5	27.75	22.5	4	24	2.25	11.5	2	5.25
17.75	7.5	6.75	10.25	1.5	4.25	4.25	7	24.75	19	4	21.5	1.75	13.75	3	6.25
20.75	6.5	7.75	9.25	1.5	4.5	3.75	2.75	33.75	24.75	5	29	0.5	12	3	5.5
18.25	11	9	10.25	1	6.5	3.5	7.25	22.5	10	5.25	23	0.5	12.75	2.25	5.25
26	9	14.5	13.5	1.5	6.75	4.25	5	29	28	3.5	24.75	2.75	14.5	1.5	8.25
20.5	8	12.25	9	1.25	4.25	4	6.5	22.5	26.25	4.5	37.25	0.75	23.75	1	9
29.5	6.75	9	8	1	3.5	6	5.75	19	32.5	4.75	40.75	2.25	18.25	2.25	8.5
13	13.5	7	13.25	1.75	7.5	2.5	8.25	24.5	16.25	7.75	26.25	1.75	9.5	3.25	8.5
21	10.5	10.5	9.5	1.75	5.75	5.25	7.5	40.75	24.25	8.25	37.5	1.25	18.25	3.5	9.25
19.25	8	16	11	3.5	4	7	6.25	37.25	28	7.75	37.75	2.75	16.5	3.75	6.75
13.5	4.25	4.75	5	0	3.25	1.75	6	24.75	17.5	6	21.5	1.5	10.25	3.75	6.25
10.5	6.5	4.25	9	0.5	3.25	2.5	3.25	14.75	13	2.75	16.25	1	8	2.5	5.25
17	2.75	6	8.25	0.25	4	4.25	4.25	21	13.5	3.25	21	2	10.75	1	7.75
13	3.75	5.75	6.75	0.25	2.75	3.25	7.75	28.25	21.5	2.75	28.25	0.25	11.5	2.75	3.75
12.25	6.5	12.5	8.25	2	5.25	2.25	6.25	38.25	16	7.5	19.5	0.5	9.75	2	10
19.5	7.25	8.75	9.75	0.5	6	1.5	5.75	28.5	26.75	6.75	26	1.25	12.75	2.5	7.25
19.75	11.25	10.25	13	1	4.75	2	7.25	31.25	18.5	6	21.5	4	15	2.75	5.25
20.5	4.25	7.75	9.25	1.5	6	3.5	3.5	27.75	24.25	4.25	26.25	1.5	9.25	2.75	8.5
12.25	8	13	7.75	1	3.75	2.75	5.75	36	19.75	8	26.75	2.25	10.75	3.25	5
21.5	6	13.25	14.25	2	5	5.5	4.25	27.75	23.5	6.5	29	1.75	11.75	2	7
9.25	8.5	10.75	7.5	1	3.5	6.5	8.25	29	17	6.25	19	0.75	16.75	3.5	4.25
37.5	12.75	20.75	19.75	3	6.75	9.75	7.25	28.5	29.75	5.75	42.25	2.75	24.5	2.25	12
21.5	6.25	10.5	9	1.25	5.5	6	5.75	34	29	6.75	42	1.5	15.25	2.75	7
20	7	6.25	12.5	2.25	3.5	5.75	5.5	21.25	26.75	4	40.5	1.25	10.25	1.75	11
19	4.75	8.25	11.5	0.5	3.25	5.5	7	27.5	30	4.75	38.25	1.25	19.75	2.75	5.5
16.25	4.5	14.75	26.25	1.25	4	3.25	18.25	16.25	15.75	5.25	28.25	2.25	10.75	2.25	5
28	13.25	17.25	20.75	1	10	7	20.25	17	22.5	7.5	39.25	3	16.25	4.25	6.5
28.25	9.75	22	23.75	0.75	4	6.25	16.25	13	19.5	2.5	19.5	1.75	10.25	0.75	3.75
18	8.5	19	21	0.25	5	4.5	13	17	29.5	3.5	32.75	0.75	27.5	1	5.75
25	9.5	14.5	23.75	0.5	6.75	7	16.25	15.75	15	5	25.5	2	10.5	3.75	4.5
32.5	11.75	24.5	24.5	1.25	13.5	14	30.75	20.25	27	15.75	33	5	18.5	9	9.5
27.25	11.5	23.5	18.75	1	18.5	15.25	35	6.5	25.5	8.25	27.5	4	20.5	4.25	6.25
21.5	6.5	12	23.75	0.25	12	14	19.5	7.5	26.5	4.25	35	1	22.75	3.25	7.75
26	8.25	7.75	21.75	0.5	11	8.5	18	12.75	29.75	7.25	45.75	2.75	15.5	8.75	7
28.5	10.25	25.75	23.75	0.5	13.75	12	24	22.5	24	6.75	30.75	3.25	23.25	6.25	7.25
25.25	10.5	15.75	19.5	0.75	13.25	13.5	22.75	7	20.75	5.75	36.75	1.75	17.5	3.25	4
43.5	8	15.25	18	0.75	7.5	17.25	14	43.75	36	29.25	63.25	12.25	40.75	9.75	13.5
32.25	11.75	14.25	21	0.75	21.5	11	21	29.75	33.5	20.25	46.25	6.25	20	9.5	17
35.5	17	23.75	21	1	22.25	14.5	25.5	8.25	33	6.75	39.5	1.5	23.5	4.25	7
28.75	8.75	10.5	18.25	0.25	6	11	17	3.25	28.75	6.5	39.25	0.5	17	7	4
39.25	5.75	20.75	26.75	0.5	5.5	10.25	10.25	24.25	33.5	10	70.5	2	10.25	9.25	9
32	8	15.5	27.75	1.75	8	9.25	12	21.75	34	8.5	68.5	2.25	14	8.25	9.5
30.75	13.5	20.25	26	1	12	20.25	14.5	30.25	37.25	11.5	61.5	2	26.25	11	10.5
23.25	13.75	17.25	18.25	0.25	7.5	21	18.75	10.25	32.75	12.5	34.75	4.25	17	6.25	5.5
19.75	8.75	14.5	14.25	1.75	8.5	10	20.5	5.5	22.75	7.75	27	4.5	17.25	4.5	5.75
32.75	11	21.25	23.5	1	12.5	10.25	19.25	28.5	23.5	12	38.25	2.25	26	6.5	9.5
46.25	9	26.5	24.25	1.5	5.75	11.75	21.5	36.75	45.25	15.25	81.25	2.5	36.5	7.75	13.25
34.75	12.25	9.75	26	0.25	9	13	10.5	15.25	33	8.25	49.25	1.75	14.5	8	7.75
49.25	11	26.25	21.5	2	9.75	15.5	21.75	51.25	37.5	22.25	74	7.5	44.75	8	11.25
26.5	7.5	23.25	28.25	1.25	5.5	7.5	18.75	19.25	32.5	13.5	64.25	2.5	20.5	6.5	14
33.25	12.25	14.75	25.25	0.75	13.5	13.75	20.75	26	31	13	52.5	3.25	21.5	12	12.5
33.25	16.75	24.75	16.5	0.25	11.25	15	16.75	12.25	26.75	13.5	22	5.5	19	8.5	7.5
23.25	17.75	21	29	0.75	12	13	15.25	13.5	26.75	9	25.75	3.75	11.25	5.25	8.5
22.25	26.5	25.5	33.5	1.25	18.25	11.75	11.25	29.25	24.25	18	24	3.25	17.25	6.75	11
34.25	12.5	31.75	25	1	15	10.5	13.75	37	36	23.75	57.5	6	27	9	15.75
31	14.25	18.5	28.25	1.25	17.5	17.25	20	37.75	44.25	11.75	67.5	2.75	26	6.75	10.25
31.75	6.25	26.5	26.25	1	8.25	14.25	10.5	34	46.5	15.75	72	2.5	33.25	7	11.5
28.5	7.5	18.75	34	1.25	12.25	15	20.75	39.5	37	26.5	58.25	3.25	17.75	3.75	10.25
17.25	7	29.5	31.5	0.75	8.5	9	20.5	24.75	29.5	9	23	1.75	12.75	3.5	5.75
27.75	9.25	20.5	28	0.5	6.75	11.75	15.5	41	34	15	46.25	3.5	21.5	6.25	13.75
32.25	17.5	27.25	23.5	1.75	13.25	11.25	20.75	29.25	37	19.25	51.75	2.5	21.5	7.75	12
24	7.75	24.75	29	1.5	8.25	11.5	23.5	33	44.25	10	62	2.25	32.25	6.25	9.75
38	15	19.75	26	1	20	21	26	40.75	31.75	16.5	60.75	5.25	35.25	8	10.25
38.5	15.5	31.25	27.25	1	18.25	17.75	22.5	38	48	18.75	77	8	27.5	12.25	17.25
25	9.75	26	17.5	0.75	11	24.75	22.75	11	32.25	11.75	20	2.5	14	6	3
30.25	12.75	27	20.75	0.75	11.25	25.5	27	30.75	31.75	18.25	46.5	5.5	30.5	8.25	7.75
36.5	13.75	22	25.75	1.25	13.25	11.25	26.75	40.5	47.75	10	62.75	2	31.25	5.5	8
19.25	7.25	19	26	0.5	7.25	8.75	14.75	21.5	27	6.75	45	2.75	17.5	5.5	4.75
39.25	5	31.75	13.5	2.25	11	14	18.25	17.5	35.5	13	36	4.5	25.75	14	14.25
42	6.75	31.5	12	0.75	3.75	14.5	7.5	42.75	35.25	19.25	46.75	4.25	25.75	9.5	19
17.5	4.5	14.25	7.75	0.25	1.75	6	2	5	28	9	23.25	1.75	18	7.5	6.75
16.75	2.25	8	5.75	0	1.25	5.75	2.5	6.25	28.25	2.25	21.75	0.5	11.25	4	5.25
25.75	2.5	16.25	6.5	0.25	1.5	5.75	1.25	10.5	29.25	5.5	20.5	2	15.5	3	10
18.75	1.75	12	7.75	0.25	4	5.25	7	16.25	37	4	32	1	12	6	10.5
21.75	15	2.75	10.5	3.25	6.75	8.5	9.25	15.5	36.25	9.25	33.25	1.75	11	6.25	9.25
22.5	2.25	5.25	9.75	0.5	3	6.5	5.25	25.75	28.75	8.25	31.75	2	16.75	9	5.75
21	3.75	8.75	10.5	1	8	4.75	4.75	35.5	31	7.5	30.5	2.25	18.5	5.75	7.25
14.25	7.25	6.25	7.25	1	5.25	3.5	4.75	37	28.25	10.25	24.75	2.5	15	6.75	6.25
17.25	3.25	12.75	6.25	1	2.5	3.75	3.75	48	26.5	6.25	26.75	1.25	11	4.25	9
19.75	3.25	5.75	4.75	0.5	2.75	5.5	4	19	23	3	17.25	0.25	9.25	3.5	6
17.75	9.5	11.25	16	1.75	8.5	6	7	34.5	26	4.5	24	3	10.75	6.75	9.75
15	9.25	12.5	13.5	0.5	6	4.25	9.5	23.25	24	8.5	15.5	1.75	9.5	3.5	3.25
28.25	3.25	7	6	0	5	5.5	3.25	28.25	26	4.25	21.5	1.5	8.75	3.25	6.25
17.25	6	3.25	8	1.5	3	6.5	3.75	38.5	22.75	2.25	19.5	2.75	17	2.25	4.25
18	6.25	5	13.25	2.25	6.75	8.25	6.5	25	22	3	28.75	1.25	18.25	5	6.5
22	8.5	9.75	11.25	3	6.75	3.5	7.25	39	24	5.25	27	2.75	10.75	3.25	9.25
24.5	4.75	22	10.75	2.5	5.25	4.5	5.5	53.5	31.25	10.5	38.75	3.75	16	6.75	9.5
31	11	12.75	15.75	3.5	7	4.75	6.75	37	31.25	7.75	39	2	18	4	9.75
16.75	2	6	5.75	4	3.25	4.5	4.25	30.5	20.5	7.75	24.75	1.25	14	3.25	5.25
16.75	6	7.75	6	0	4.5	8.25	6	2.75	27	4.25	17.5	1.75	12.75	5	5
25	3	6.5	4.5	0.5	1.5	10.5	4.25	20.25	20	3.5	24.5	0.75	13	4.75	6.5
17	3.75	4.5	9	1.5	3.5	10.25	2.75	19.75	27.75	3.5	23	1.5	14	4.5	5.25
20	12	5.5	11.75	1.25	7.5	5.75	7.5	33.25	16.75	4.25	24.5	2.75	9	2.25	3.5
13.75	9.5	14.25	12.75	1.25	8.25	4.25	9	39	15	8.5	13	2.5	4.25	2.25	10
18.25	11.75	8.5	13.25	3	5.25	5	4.25	32.5	32	6.25	35.5	0	15.5	2	9
20.5	6	7	10	2.25	5.25	5.25	5	45.25	36.75	8.75	26.5	1.5	16.75	2.5	10
18.25	9.25	5.75	9	0.75	5	3.25	6	38	24.25	8.25	21.25	1	12	2.75	8.25
18.5	4.25	9.75	11	1	3	4	4.25	40.25	21	3.75	24.5	2.5	13.5	4.25	5.75
17	7.25	16	8.75	1.75	8.25	6	6.5	35.75	23	7	30.5	0.5	18.75	4.5	6
21.5	9.25	6.5	13.75	3.25	6	3.5	6.5	39	25	5.75	32.25	0.5	16.5	1.75	8.5
26	5.25	10.5	11.5	0.25	3.75	3.5	3.75	24	32	7.75	31.75	2.5	19.75	2.25	10.75
17.75	6.25	4.5	11.5	3	5.25	4	4	23.25	18.25	3.75	22	2.5	11.75	2	7.5
19.5	11.75	3.5	6.25	1	6.75	6	2.25	29.5	22.5	6	23.25	0.75	6.75	2.25	8.75
17.75	7.75	9.25	9.75	1	5.25	4.5	6.75	30	16.75	5.25	25.5	0.25	10.75	2.5	11
20.75	12.75	6.25	13.25	1.25	5.5	4.5	5.75	46.5	24.75	4.25	30.75	1	15.75	3.25	8
15.25	8	7	11.75	2.5	2.75	5.75	6.5	40	25	4.75	29.75	1	14.5	2.25	7.25
17	10.75	11.5	11.25	1.25	8	3.75	6	34.25	21	5.5	30.75	1	18	2.5	4.75
36.5	8.75	11.75	8	2.25	4.75	6.5	5.25	45.25	32.5	7.25	36.25	2.5	28.5	4.5	11.75
15.25	4.5	8	13.5	1.25	6.5	4.25	6	17	21.25	6.75	29.25	0.5	11.5	2	3.5
17.75	3.5	10.75	4	1.5	3.5	5	1	38.75	27.5	6.25	23	1	13.5	2.5	4.5
11.75	5	8.75	6.5	0.5	3.75	1.25	2.75	32.5	19.75	4.25	18	1.5	13	2.25	4.5
15.5	6.25	6.5	5.75	0.75	5.25	4.5	1.75	23.75	19	3.25	21.25	0.75	14.25	3	7.5
16	9.75	5.5	9.5	0.5	3	5.75	3.75	26.25	23.25	5.75	25.5	1.5	12	2.5	8.25
16.25	7.5	11	8	3.25	3.25	4.75	5.5	36.75	22.5	3.75	29	2	15.25	1.5	6
10.75	6.5	9	10.5	1.5	5.25	5	6	29.5	20.75	8	12	0.5	5	4.25	6.5
9.75	7.5	3.5	11	2	7.25	4	3.5	32.25	28.75	1.75	24.25	0.5	7.5	4	7.75
21.5	4.75	8.75	12	0.75	2.75	2.75	4.75	33.25	28	5.25	27.25	0.75	15.5	2	5.75
12	9.25	7.25	11	1.75	5.25	4.25	3.25	36.75	17.75	7.75	15.25	1	8.5	2.75	5.5
18.25	5.5	7.25	9.25	2.25	3	3.5	5.5	33	29.5	4.75	26.5	2.25	16	1.25	5.75
16	0.75	4.25	4	0	1	4	2.25	11.5	13.75	2.5	24.25	1.25	14.25	0.25	7.75
18.25	2.25	5	4.75	1.25	2.75	4	2.75	32.5	21.25	3	23.25	1.25	8	0.75	4.75
24.5	4.75	8.5	6.75	0	4	6.75	2.75	12.25	35.25	5.5	27.5	2	9	3.25	13.25
18.75	2.5	8.5	5.75	0.25	1.25	5.25	2.25	5.75	18.5	3.25	14.25	3.5	12.5	5	3
21.75	2.75	6.75	9.25	0	3.5	7.75	2	7.75	26	4.25	19.5	2.75	13.75	4.5	3.5
20.25	3	5	4.5	0.25	1.5	4.75	2.25	15.25	16.5	2.5	28	0	16.25	2.25	3.5
14.75	5.5	5	7.5	0.5	2.25	6	3.25	28.5	33.25	2.5	27.5	1.25	16.25	4	6.5
14.75	8.5	6.25	13.25	2	4.75	8	3	20.75	21	4.25	26.75	1.25	14	2.5	5.75
21	18.25	7.75	14.75	4.75	7.25	5.25	9.25	36.25	19.5	7	22	1.5	8	5.75	7.25
23.25	7	7.25	9.75	1	4.75	4.25	4.25	28	28.25	6.5	29	2.25	20.75	4	9.75
14.25	3	3.5	5.25	0	2.25	5	4.25	9.5	17	6.25	20.25	1.25	6.75	1.75	6.25
11.5	7.75	5.75	11	0.5	5.5	5.75	6.25	19.75	15	3.25	19	2	16.5	1.75	8
14	8.75	4.25	10	2.25	5	7.5	7.75	20	21.5	5.25	19.25	1	12.25	2	5.5
24.25	7	11	9.25	1	2.5	6	3.5	38.75	22.25	6.25	24.25	1	26	2.5	8.5
18	12.5	15.75	10.75	1.5	7.25	3.5	6	30.25	18.75	5.75	21.25	1.75	15.75	3.75	11.25
17.25	10.75	11.5	13.25	1	6.75	4	4.75	33.5	25	4	28.5	0	19.25	4.5	5
30.25	9.25	6.25	12.25	1	3.5	3	8.25	23	29.75	5.25	37.5	0.5	16.25	1.25	8
25.75	6.75	10.25	12	2.25	5.5	4.75	7	26.5	33	10	36.5	1.25	23	2.75	6.5
15.75	8.5	4.75	8.5	2	6.75	2	4.5	35.75	22	4.25	31.25	0.75	12.25	2	8.75
17.5	9.25	5.25	12.5	1	7.5	3	6	30.5	20.75	6.75	25.25	1.75	9.25	2.75	7.25
20	8.25	16.25	10.75	3	4	3	6.25	52.75	24.25	7	30	1.5	16.75	3.25	4.5
18	11.25	6.75	11.25	1.25	7.75	4	7.25	32.5	20.75	7.75	24.75	1.25	13.25	1.75	6.5
25.25	7.75	11.25	11.25	2.75	3.5	3.5	7.75	34	21	4.75	28.5	0.75	14	2.25	7
25.5	5.5	9	9	0.75	7.25	5	5.75	37	21.25	9.25	33.25	2.25	14.5	4.25	7
25.5	11	13.25	9.25	3.75	2.75	5.5	5	30.25	30.5	4.75	44	1.75	14	2.25	8.25
17.25	9.75	13.75	9.25	1.5	4.75	4.5	4.25	26.25	23.75	5.75	35	2.5	12.5	2	7.75
20	4.5	7.5	7.25	1	1.25	6.75	2.25	6.5	15.25	3	15	1.25	8.25	3.25	4
17.25	4	3	5	0	2.5	6	4.75	8	22.25	2	19.5	1.5	15	4.25	8.75
10.5	4	5	6.5	1.75	5.25	6	6.25	23.25	12.25	4	14.5	2.5	12.25	7.5	3.75
21.5	5	7	9	2	3.5	10.5	5	34.5	20	8	19.25	3	14.5	4.25	3.75
30.75	8	9.5	7.5	1	3.75	7.5	4	50.5	24.75	4.75	24.25	1	12	2.5	10.25
19.75	9.25	9.25	11.25	3.25	3	3.5	9.5	30.75	20.5	5	17.5	2	11.75	1.75	6.5
15.5	7.75	4.25	8.75	5.25	7.25	4.75	5.75	27.5	16	4	21.75	0.75	12.75	3.5	7
18	12	6.5	9.75	1.5	3.25	4.5	9.25	52.75	29.25	6.25	39.25	1.75	24	2	9.25
27.5	10	5.25	10.25	2	6.25	2.75	6.5	24	22.5	6.5	31.75	1.25	14.5	2.5	7.5
23	5.5	7.25	8.75	0.5	2.25	3	5	34.75	36	6	34.75	1.75	17.25	1.75	12.75
15.25	6.75	9.25	8.75	3.75	2.5	2.75	4	39.5	15.25	5.5	17	1	8.25	2.25	9
20.5	3.5	5.25	8.5	2	2.75	5.5	3.75	35.25	17.75	5.25	18.75	1.75	12.75	1.25	5.25
20.75	11.25	4	9.75	1.75	4.25	8.75	5.25	26.5	21.25	5	26.5	0.75	13.75	5	4.75
20.25	7	8.5	9	0.25	5	5.75	4.75	29.75	27.5	3.25	20.75	2	12.5	0.5	7
24	9.75	13.5	12	1.75	4	7.5	8.25	51.25	18.5	4.25	26.5	2.75	10.5	2	7
22	7.25	6	10.5	1	4	4	7.75	35.25	28.75	3.75	35.5	0.25	15	2.5	8
10.25	10.5	6.25	10.5	0.75	5.75	5.75	8	24	19.25	3.75	21.75	1.5	11.5	3	3.25
27.75	12.5	12.5	11.5	2.25	4	5.25	5.25	31.25	20.75	7	33.5	1.25	13.25	1.5	9.5
27	6	15.25	14.5	1.75	3.25	4.5	3.25	41.5	34.25	6.75	41.25	3.25	16.25	1.25	12.5
13	9.75	11.75	11.75	1	6.75	4	7.75	25	24	5	28.25	1.25	12.75	2.75	5.5
19.5	7.25	7.25	9	1.75	5.25	2.75	1.75	36	20.75	5.75	29.5	1.5	12.25	2.5	10.25
21.25	4.75	11.75	7.75	0.5	2.5	5.75	3	23.25	20.75	4.5	34	1.75	19.25	1.25	9.5
33.5	2.25	19.5	7.25	0.5	3.25	10.75	3.75	20.75	28.75	12.5	52.5	3.25	23.5	9.5	10
14.75	1.25	10.5	5.75	0.25	0.5	3.5	2	16.5	15	3.25	16.5	1.25	9.75	3	8.75
16.25	3.5	9	7.25	1.5	3.75	8.75	4.5	17.5	16.5	5.75	18.75	2.5	10.25	3.75	5.5
16.5	8.25	9.75	7	0.25	4.25	4	5	36.25	18.75	8.25	20.5	1.75	9.5	2.25	6
20.75	10.5	5.25	9.75	1.25	5	3.5	5.5	40	21.75	7.25	24.5	1.5	12.25	5.5	6.75
10.5	8.25	11.5	9.75	0.75	4	4.5	5.5	41.25	18	7	13.75	1.75	10.25	5.25	11.25
14.75	8	3.75	10.75	2.25	3.25	4.75	7.75	23.25	18	3.25	29	0.75	8.25	2.5	5
27.25	8.5	7.25	12.25	1.5	2.75	4.5	5.25	32.25	34	7	39.25	1.75	26.75	1	10.25
20.25	4.5	9.25	8.5	0.75	1.75	3.25	5.5	36	26	5.5	32.25	0.75	17.25	5.75	6.25
21.75	5.75	13.5	11.25	1.75	3.75	5.5	3.5	44.5	23.75	6.25	29.75	3.75	15.25	2	9.5
10.75	10.25	8	12.5	0.75	8.25	3.25	7.75	18.25	13.5	5.5	14	1.25	6	1.5	4.5
25.25	9.5	11.5	7.75	2	6	5.75	7.5	36.5	18.75	4.5	30.75	1.75	18.25	2.75	8.25
29	6	7.75	9.5	1.25	7.5	7	6.75	32.25	22	7	31.25	1	22	0.75	8
10.5	6.75	6	10.25	1.25	7.5	3	3	22.25	20.25	4	20.25	1.25	13.5	3.5	6.25
16.75	6.25	7.5	8	1	4.5	4.5	4.25	36.75	25	5.25	16.25	1.5	12.5	2.5	7
24	5	9.75	9.25	2	3	4.25	4.25	39.5	24.25	7	35.25	0.25	18.75	2.75	10.75
26.5	8.25	14	9	2.5	3.5	5	4.5	40.25	23.5	5.75	33	2.5	14.5	1.75	12.25
18.75	17	15	15.5	1.75	6.5	6	11	32.5	19	12	25	2.25	12.25	2.5	10.25
18.75	7.75	10.75	12	2.75	4.75	1.25	7.75	29.75	31.5	8.25	33.75	1	14.25	4	9
20.5	7.75	12.75	10.25	2.25	3.75	4.75	2.5	19.75	31.25	10.5	39.25	1	21.75	1.25	8
15.75	7.5	12	8.75	1.25	3	5.75	4	42	32	5	40.75	1	24	3.5	8.5
19.75	8	6.25	11	3.5	5	5.25	6.25	28.75	18.75	8.5	27.5	1	11.75	4.5	7.5
13	6.5	6.25	10.5	2	5.5	3	2.25	35	12.75	5.5	14.5	0.5	10.25	1	4.25
21.25	2.75	3.75	2.75	0.25	2.25	4	2	4.75	12.75	3	20.5	1.25	9.75	1	4.25
13.75	2.5	3.25	3.25	1	2.25	5.5	2	10.75	16.25	2.5	16.75	0.5	13	1	4.75
12.5	5	7.25	6.25	1.75	3.25	7.5	4.5	22	13	4.25	13	1.25	12.75	5	5.25
15.75	6.5	11.5	7	2	5.5	5.75	3.25	40.75	18.5	6.75	16.75	0.75	10.75	2	3.5
12.75	6.5	8.5	10.5	0.25	8.25	4	3.25	30.25	21.25	8.25	18	1.5	11.25	4.75	6.25
20.75	6.25	7	8.75	2	3.25	6	5.5	24.25	21.5	4.5	32.5	0.5	14.5	5	8.25
25	9	8.25	12.5	2	5.75	5.75	6	42	20.5	6	28.75	1.25	18.5	2.25	6.5
12	11	11.25	14.75	1	5.5	3.75	6.75	29.25	24.75	3.5	26.25	1	12.5	1.5	8
15.5	11	5	13	2	5.5	5.5	5.5	16	22	1.75	22.25	1.25	11.25	1.5	3.25
34	7.25	12.25	12.75	2.75	9.25	5.75	7.75	32.25	22	10	34	1.75	11.75	2.25	5
18.5	4.5	14.5	9.5	1.5	1.75	4.75	3.25	43.25	26	4.5	37	2	17.25	4.5	10.5
10.5	11	8.5	11.5	0.75	5.5	5	5.75	24	15.25	5.25	20	1.25	11.75	1.25	6.5
11.25	9.25	4.25	9.5	1.75	4.75	4.5	3	25.75	16	2.25	10.75	0.75	5.5	1.5	4.25
20.5	6.75	5.25	10.25	1.75	6.25	4.75	4	41	25	3.5	29	1.5	13.75	2.25	7.5
13.5	5.25	11	12.25	0.75	5.25	4.5	3.5	37.75	28.5	4.25	21.25	1.25	8	2.25	10
24	7.25	11	8.5	0.75	5	5.5	3.25	44	25.25	4	36.75	1.5	18.5	1.25	8
14.5	5.25	11.25	8.25	1.5	2.5	5.25	4	28.25	19.75	3.75	18.5	0.75	14	1.5	4.75
21.5	7	8	8.5	4.25	5	5.75	5.5	26.25	30.5	4.75	27.75	0.5	14	1.5	5
14.25	1.25	7.25	7	0.5	2.25	5	2.5	20.75	20.75	5.5	25.5	1.5	12.75	3	4.75
15.5	7	2.5	7.75	0.25	6	2.25	3.5	18.75	11	2.75	18	1	10.5	1.75	4.25
12.5	6.75	5.25	7	0.25	3.5	4.5	3.5	26	17.5	5	14.25	1	9.5	2.75	5
22	5.75	13.5	11.75	2.5	4	5.5	4	30	20.5	5.25	31	1.75	17.5	5.25	4.75
17.25	8	6.5	8.5	1.25	2.25	2.75	6.5	26.5	18	6	25.5	0.25	13.25	2	4.5
33.5	9.5	5	10	1.5	4	4.75	5.75	27	24	4.75	30.75	0.75	21	1	4
17.75	7	13.75	9.5	1.25	4.25	5.25	5	30	19.5	4.5	30.5	1.75	16.25	1.5	8.75
20.75	10.25	15	8.25	1.5	4	3.25	2.75	39.5	25.5	5.75	44.25	1.25	16.75	1	12.25
12.75	12	10.5	11.25	1	6.5	3.5	8.5	31.5	16.5	7.25	23.25	2.75	9.25	3	6.75
11.5	5.5	14	10	1	10.75	4.75	5	35.75	13.75	7	17.5	1.5	9.75	3	6
34	11.25	12.75	9	0.25	3.75	5.25	6.75	36.25	21.5	7	33.75	1	28	1.5	9.75
28.75	9	13	12.25	4.25	4.25	5.5	5.5	26.75	22.75	7.75	45.75	1.25	16.25	2.75	6
15	6.75	9.5	11.75	2.25	2.75	5	4.5	34.75	22.25	4.25	29	1	15.75	2.25	6.25
19.5	8.5	8	9	2.5	5.5	5	4.75	41.25	18.75	4	29.75	0.75	17	3.5	7.5
23.25	7.5	9.75	12.5	1.5	3.5	4.25	3	24	22.75	9.25	32.25	1	15.5	3.25	5.75
15.5	8.75	8.5	11.5	2	4.75	5	6.75	39.5	26.5	8.25	30	1.75	11.75	2	8.75
13	7.5	9.25	10	3	4	3	5.25	40	21.5	5	22.25	2.75	14	2.5	5.5
17	13.25	14.75	10.75	3.25	5.75	6	7	44.75	18.5	8	22	2.25	8.75	1.25	5.5
14.75	4.75	7.25	10	0.75	3.25	6.5	4.5	28.75	16	4	22.5	1.25	14	1.5	5
21.5	6	7.25	12.5	1.25	3.5	5.25	5.5	30.75	29.25	5.5	40.5	1	18	2.25	7
18	9.25	9	11.75	1.5	6	5	4.75	31.75	27.5	6	34.5	1	21	1.75	5.5
36.5	9	13.75	13.5	3.75	4.75	5	5.5	42	31	12.25	53.75	3.75	18.25	4.75	14.25
23	10	12.5	15.25	2.25	7.5	7.75	5	18.25	22.75	8.5	33.75	2.25	14.25	4.25	9.25
21.75	6.5	14.5	13.25	1.5	5.25	6.75	6	33.25	21.5	10.5	35	0.5	20.25	3	9.25
12	10.75	10.5	11.5	1.25	7.5	6	4.25	43.75	25.25	6	28.25	1	11.5	0.75	9.25
11.75	5.25	6.25	7.75	0.25	1.5	6	3.25	25.25	20.75	5.25	27.25	1.75	11.5	1	6.25
13.5	2	3.5	5.5	2.25	1.5	6	2.5	12.5	12.25	1	15	0.5	9.25	2	5.5
18.75	2	9	7.75	0.75	1.5	6.75	3	19.5	28.5	4.25	15.25	0.5	19.75	1.75	7
17.5	11	17.25	14.25	2.75	10.5	5.5	14.75	43	23.25	8.75	27	5.25	17.5	6	5.75
17	6.5	4.25	8.75	1.5	5.5	5	2.25	26.25	16	6.25	21.25	2.25	18	0.75	9.5
11	4.75	5	10.5	0.25	3.5	6.5	3.5	43.25	14	4.25	20.25	2	18.25	4.25	1.5
16.75	6.25	7.25	12.25	2	4.5	4.5	5.25	25	19	5	24	1.25	7.25	1.25	5.5
21.25	6.5	10.75	10.75	2	5.75	5.25	6	31	18.25	8	25	1.5	12	2.5	6
25.25	9.75	19.75	9.75	1.25	5.75	6.25	3.75	69.25	29	10.75	39.75	2.75	16.75	1.75	7.25
13	11	4.25	7.25	4.5	6.5	3.75	6.5	43.5	14.5	8.25	20	3.75	11.5	2	10.5
16.5	7	8.75	12.75	1.5	6.5	5.25	4.5	30.25	27.25	4.25	29	1.75	18.5	1.75	6.25
15.25	11.75	9.5	9.5	2	8.5	4.75	6.25	42.75	10.5	5.75	18	2.75	9	4	4.5
29	5.75	8.25	9.75	1	3.5	2.75	3	28	25.75	2.5	33.5	0.75	16	1.5	10.25
21.25	8.5	6.5	9.75	1.25	2.5	4	4.5	43.75	24.5	5.25	41.5	1.75	13.75	2	8
25.5	10.25	15.25	14	1.25	3	5.75	7.25	30.5	31	8.25	41.75	2.5	24.25	4.75	11.25
9.25	4.75	6	6.25	3.5	3.75	3.25	1.75	28.5	15.5	4.25	32	1.25	11	3	8.25
14.5	4.75	8.75	7.25	0.75	3	9	3.25	13.5	7.75	5	11.75	1.25	8.25	2.5	4.5
13	6	7.75	7.5	1.5	6.5	7.75	4	28.25	14.5	5.5	28.25	0.5	9.5	2.75	5.25
7.25	6.25	5.5	10.25	1	3.25	7.25	3.5	35	16	9	18	1.75	7.5	2.5	5
20.75	7.5	6.75	9.75	2.5	3.5	6.5	2.5	18	18.5	3.25	29.75	1.25	12.25	1	4
13.5	6	8.75	7.25	1.75	3.5	4.75	5	26.5	17.25	3	16.25	1.75	14	4.5	6.25
15.75	8.25	8.5	11.5	0.5	2.5	6	6.75	29.25	26.75	7.25	23	1.75	9.25	1.75	5.5
16.75	10	6.75	11.25	1.25	6.5	3.5	5	34	24.75	7.25	24.75	1.75	12.75	1.75	9
23.75	6.5	16	10	1.5	5.75	3.5	3.5	42.25	20.25	5	30.25	1.25	15.25	3.5	7.25
14.75	6	7	11	1	3.75	5	2.75	25.25	18	3	25.25	0.75	10.75	4	5.75
20.25	8.75	16.75	15	1.75	3.75	7	5.75	31.75	26	6.25	30.75	1	18	2.5	8.5
29.5	8.75	12.75	15	3.25	9	8.25	8.25	20.5	27.25	7.5	36	2.5	16.5	4	6.5
11.25	9.75	13	12.25	2.75	5.5	6.75	4.75	41.75	12.25	5.5	17.25	1	9.5	0.5	7
24	9.75	8.75	14.5	3.5	4.25	5.25	7	43	22.25	3.75	30	1.5	15.25	1.5	11.75
14.5	3.5	3	6	2.5	3.5	4	2.75	36.5	21.5	5.5	33	2	14.25	2.5	5.25
24	5.5	14	8	2.5	3.75	4.25	3.75	46.25	26.75	7.25	35.5	0.5	12.75	1.5	11.5
11	5	5.5	9.25	0.75	6.25	3.25	3.5	20.25	22.75	4.25	19.5	0.75	12.5	1.75	6.5
15.5	4.25	7.5	10.25	1.25	4.25	4	6.25	37	13	4.5	19.5	0.75	11.25	3	6
16.5	9.25	6.25	12.5	1.25	6.5	5.75	3.75	28.75	17	4.25	18	1.5	11.5	1.75	5.5
18.25	8.75	7.5	11	1	5.25	5.75	6.25	32	17.25	5.5	19	0.25	12.5	2.75	5.5
23.25	8.75	6.75	11.75	1.5	5.5	5	3.75	32.25	22.75	4.75	33	1	9.75	1.75	4.75
19.25	9.5	10.75	12	0.75	7.75	4.5	6.75	28.75	20.75	7.25	43.5	2.25	21.5	1.25	6.75
31.75	6.25	16.25	12.75	2	5	6	6.5	38.75	30	8.25	38.5	1.25	23.25	0.5	10
20	7.5	12.25	8.5	0.25	6.5	5	6.75	28.5	27.25	10	40.5	0.75	20.75	2.25	8.25
25.5	9.25	11.5	9.75	4.25	5.5	4.25	3.25	43.25	32	7	41.25	2.5	15	1	14.25
20.75	8	10.5	12	4.5	4.5	5.5	5	23	19.5	4.25	40	1	18.75	1.25	5.75
24.75	5	16.75	8.5	0.75	3	8.5	4.25	11.5	17	5.5	19	1.75	12.75	2.5	7.5
20.25	4	12.75	3.25	0.5	0.75	7.5	4.25	10	20.75	5.25	22.75	2.25	16	8.5	5
15.25	5.25	3.75	13.25	0.5	3.25	9.5	4.75	18.5	14.5	4	19.5	1.5	15.25	0.75	3.75
17.5	3.75	12.75	6	0.75	3.25	7	3.5	40	26.25	6.75	29.25	0.75	13.25	3.5	6
19.5	6.5	8.5	9.25	4.75	3	7	7	37	22.25	6.5	23	1.75	7.25	1	7.75
14.5	8	7.5	10.25	1.25	4.25	7	2.75	27	24.75	5.75	22.75	0.75	15.5	2.5	7.5
8	13.5	9.5	8.75	1	7.75	6	7	34	15.5	4.75	13.5	2.25	5.25	4.75	5.75
22.75	6.5	14.25	10	1.5	3.25	5	5.5	37.25	30.25	5	33.5	1.25	20.75	6	10.5
15.25	12.75	13.5	12.75	2	5.75	3.25	8	27.5	25.75	3.25	24.25	0.75	13	2.5	5.75
25.25	7.75	9	15	1.25	4	6	8.5	49.25	20.5	6.25	34.5	1.75	16	1.75	7.5
17.5	4.5	4	7.25	2.75	1.5	5.25	4	22.5	19	6	27.5	2	18	2.5	8.25
13.5	8.5	4.75	11	1.25	7.25	3.5	2.5	33.25	16.75	4.5	16.75	0.25	9	3	5.5
20.5	8.25	14.5	12.5	1.75	4.5	5.5	3	30.75	22.5	6.75	23	1.25	14.75	1	6.75
22.25	10.5	8.5	9	1.5	3.75	3	4.75	49.5	25.25	8.25	33	1	17.25	1.5	10.25
22.75	9.5	13.25	11.75	3	4	7.5	5.25	38.5	22	6.5	32.5	1.5	13.75	1.75	4
18.75	7.25	10.5	11	0.75	4	7.25	4.75	13.75	26.75	5	34.25	0.25	16.75	1.5	6.25
20.75	8.5	13.75	9.75	3.25	4.75	8	2.5	51	22.75	11.75	31.5	2.75	15.5	5.25	14.25
8.5	11	9.5	11.25	1.25	3.5	4	6.5	37.75	14	4.75	14.75	1	7.25	1	5
13.75	4.25	5.25	9.25	1.75	4.25	5	3.25	25.75	12	3.75	21	1.25	9	2.5	3.5
22.25	4.75	4	6.5	2	3	7.25	2.5	15	18	2.25	24.75	0.5	13.5	1.75	5
17.75	1.75	5.5	4.5	0	3	8.5	4.25	10.75	15	3.5	15.75	3.75	6	7.25	7.75
16.75	9.5	8.25	7	1.75	3	6.75	7.5	35.25	19	4	20	1.75	14.25	2.25	7.5
17.5	10	10.5	12.75	1	6.75	4.5	10.25	24	12.25	4.5	22.25	1	11.75	1.5	4.25
19.25	13.75	12.75	11.75	1.25	8.25	4.75	4	29.5	23.25	4	28.25	1	17.75	2	5.25
14.75	6	8.75	11	1.25	2.5	5	1.75	30.5	20.5	5.5	23	1.25	18	3.25	7
15	7.25	10	10.25	1	4	6.5	7.5	25.25	20	5.5	18.75	1.25	9.5	3.25	5
22.5	8.25	11.5	9.25	3.5	4.75	4	5.25	37.5	18	6.25	29.5	2.25	12.75	2.5	7
21.75	9	10.5	10.75	2.25	4.25	2.75	4.75	30.25	22.75	4	32.75	0.25	12.75	1	8.75
13.5	5.5	13	14.25	1.25	4	4.25	3.75	30.5	17.5	9	30.5	3	11	3	7.25
21.75	5.75	9.5	11.5	1.25	2.25	4.75	4.5	36.75	21.75	4.5	33.75	1.25	14	1.5	7.5
12.75	10.5	13	9	0.5	4	4.25	5.25	37.25	22.25	3.5	33.25	0.75	17	2.5	4.5
19	8.75	11.25	9.25	0.5	3.5	5.25	6	33.25	24.5	7.75	29	0.75	20.25	1.75	6.5
21.75	8.75	14	12	1.5	5.75	6.75	6.5	32.25	22.5	7.5	38.5	0.5	18.25	2.25	5.5
17.75	7.5	11.75	12	1.5	3.25	5.25	5	36.75	22	5.75	36.25	2	13	3	6.75
12	7	9.25	8.25	0	2.5	4.75	1.5	22.5	7.25	3.5	16.25	0.75	7.5	1.5	5.25
12	7.5	7.25	8.25	3.5	2	6	4.5	25.5	19.5	4	16	1	14	2	4.75
15.5	3.25	5.25	7	1	5	4.25	8.25	37.5	25.75	5.5	22.75	2.25	15	3.25	10.5
17.75	3.5	4.25	8.25	0.5	3.25	5	1.75	21	24.25	2.25	15.5	0.5	9	1.25	7
12.75	7.75	11.25	12.25	1.75	3.5	3.75	1.75	51	20.5	10.75	19	1.75	11.75	1.5	9
21.25	9	8	11.25	2	3.75	5	3	30	17.5	4.25	25.75	2.25	9.5	2.75	5.75
16.75	6.75	10.75	12.75	1.5	6	7	2	15	15.5	4	21	0.5	13.5	1	4.5
28.5	7.25	8.5	9.5	0.5	3.75	7.5	6.75	42.5	21	5.5	29.75	1.5	19.5	5.25	11.25
22	11.25	15.25	14.25	3	8.75	6.5	3.75	24.25	26.5	9	32.25	1.75	12.75	2.25	7
23.5	8	5.5	7.75	0.5	4.75	4.5	8.75	31.5	27.25	5.25	43	0.75	18.25	3	7.25
23.75	9.25	11.75	11	1.5	4	5	9.25	34.75	27.75	8.25	38.5	2.75	16.25	1	9
19.25	9	16.25	12.5	2	5.5	7.75	7.25	30	22.5	8.25	41.5	1.25	14.5	3	5.25
20	8.25	11	12.5	0.25	3.25	7.75	7.75	19.75	25	5.75	39.75	1.25	21.75	2.25	6.5
25	4.75	10	12.25	0	3	7.75	17.25	56.25	34.5	7.75	57.75	1.25	21.5	3.25	13
12.25	9	17	16	1	3.25	10.25	10.5	43.25	29	6.25	41	0.5	18.75	2.75	11.75
14.5	5	36.25	14.75	1	3	12	6	48.5	34.5	11.25	34.75	1.25	34	2	7.5
21.25	7.5	24.5	13.5	1.75	4.5	11.75	17	35.75	30.75	6	44.25	3.25	19.25	3.75	9
17	8.5	11.5	15.75	1.5	3.75	8	11.5	19.25	13.75	3.5	27.5	1	11.5	2.75	4.75
52	13.25	18.5	22.75	0.75	8.75	12	25.75	27.75	19	10.75	32	2	29.25	3.25	10.25
28.5	11.75	20	21.25	0.5	10.5	14	16.75	22.5	16	7.25	21	4.25	20	6.25	4.5
66.75	10.75	18	18	0.25	6.25	9.5	11.25	12	21.5	3.25	42.5	2.5	35.5	1.5	10.25
52	4.25	20.25	10	0.25	5	11	10	11.5	27	11.75	44.75	2.75	22.5	10	8.5
25.25	2.5	9.5	12.75	0	3.25	8	3	12	17.75	6.75	20.25	2.75	12.5	3.25	5.75
21.75	1	8.5	7.75	0.25	1.75	9.5	1.5	7	17	3.75	27	0.75	9.25	4	6.5
19.5	1.25	10.25	8.25	0.25	1.75	6.25	3.75	8.25	22	4.5	16.75	0.75	10	3	7.25
16.5	2.75	6	8.75	0.75	3.75	5.75	4	5.25	22.5	5.5	21.75	1.25	5.25	5.75	5.25
16.75	1.75	4.5	7.75	0.75	2.25	4.75	6	20.75	30.75	3.75	32	1	14.75	6	8.5
16	2	5	12.75	1.5	3.25	6	7.25	37	24.25	4.25	31	2.25	13.75	6.5	8
19.25	6.5	6.5	7.5	4.75	2.5	5.75	9	28.25	17	7.75	27	3.5	12.5	5.5	12.75
15	8	11.25	11.75	0.5	8.5	7	7.5	27.75	18.5	5	15.25	2	11.25	4.5	7.75
15.25	11	8	14.25	2.5	9	5.5	8.75	27	20.5	2.75	22.75	0.75	10.25	3	5.5
27.75	5	17.25	13.25	1.75	3.5	6	7.5	38.75	33.5	5.5	53	0.5	13.25	5	9.75
16.25	11.25	20	11.25	0.75	5.5	8.5	5.25	40.25	19.25	8.25	24.25	1.5	13	1.5	9.75
19.5	12	8.75	15	0.75	6.25	9.5	6.25	18.25	22	7	31.75	0.25	18	3	5.5
21.5	5	8.25	7.5	0.5	3.75	8.5	3.25	48.25	22.25	6.75	38.5	1	14	3.75	6.5
28.75	11.5	13.5	11.25	3.75	4.75	7.25	5.75	25.75	28.25	9	35.5	3.5	18	3.5	11.25
16	10.75	6.75	14.25	1.25	4	5	6.75	31	16.5	6	21.5	1.75	15.25	3.75	6
13	6.5	4.75	9.75	1.75	3.25	7.25	4.25	21.5	16.5	3	21	1.25	7.25	1	4.25
9.75	4	6.25	9.5	0.25	3.5	8.25	4.5	19.5	25.25	4	19.25	0.75	18.25	3.25	6
20.25	16	9.5	13	2.75	11	5.25	7	25.75	17	5.75	20.75	0.75	7.75	2	3.25
15	8.5	8.75	10.75	3	5.5	3.75	5	25.25	17	4	22.25	1.5	11.25	1.5	8.25
26.75	7.25	13.5	11	1.75	2	5.75	5.5	40.25	35.75	3.75	44.75	0.75	16.5	1.5	11.5
17.5	8.75	8.75	13.25	0.75	3.75	6.5	4.75	27.5	17.25	4.75	39.75	0.75	17.75	3.25	7.75
23.25	11.75	12.5	12.5	3	4.5	5.25	4.75	34.25	28	5.5	29.5	1.75	17	2	10.75
10	12.5	9.75	14.25	2.5	5	5	4	50	24.5	4.75	21	0.5	12.25	4.5	8
13.25	3	5.75	4.75	2.25	1.5	5.75	2	17.5	16.25	3.25	23.75	1.25	6	1.75	5
17	2	9	11.25	1	1.75	8	3.25	42	16.5	4.5	21.75	0.5	14.5	1.5	6
13.75	5.25	7.25	9.25	2.25	2.5	9.75	3.25	17.75	16.25	2.5	14	2.25	10.5	2.25	6.25
14.25	11.25	9.25	10.25	2.5	7.5	5.25	6.25	42.75	19.5	5	23	1.25	13.25	3	5.5
12	3	10	6.75	0	1.5	4.75	3.25	33.25	20.25	4.75	28.75	1	10.5	1.75	6.25
14	8.25	4.25	7.75	1.5	3.5	4	6	40.75	19.25	4.25	28.75	0.75	15.75	1.75	7.5
17	4.5	6.25	10.25	1.5	2.25	4.5	3.75	22.25	15.5	4.25	24.5	1.25	11.75	2.75	5.75
19.25	9.25	10.75	12.75	2	5.75	8.5	10.25	14.5	16	5.5	17.5	0.5	9.75	2	6
18	6.75	12	11.75	2.5	4.75	5	6	40.25	25	8.75	21.75	1.5	13.75	1.5	5.5
21	11.5	12	11.75	2.25	3.25	4.75	7.5	29.75	24.75	6.25	30.75	3.25	16	3	4.75
23.75	8.75	8.25	12.25	0.25	4.25	5	6.5	34.5	35	7	38.75	2.25	15.5	1.25	8
22.25	8	10.25	9.25	1.75	7.25	5	7	29	24	8.5	35	1.5	28	1.75	7.5
17.25	5.25	9.25	7.5	0.75	2	6.75	1	10.5	13	4	18	2	7.75	3.75	6.25
36.25	1.75	10	11.25	0.25	3.75	8.75	6.5	5.75	17	5.75	18.5	1.5	15.25	5.25	5.5
42.25	10.25	16.25	16	0.25	3.75	16.75	3.75	14.25	20.25	11	25.25	2.5	18.25	7.5	4.75
35	8	13	18	0.5	3.75	16.25	7.75	12	21.5	9.25	29.5	3.25	15.75	4.5	4
18.5	1.75	3	6	0.25	1.25	8.25	3.75	9.25	23	3	21.25	0.75	21.75	3.25	3.75
13.25	3.5	5.25	5	0	1	7.25	3.5	14.25	29.5	9.75	18.75	0.25	19.5	2.25	2.5
25.5	6.75	9.25	11.25	3	2.5	11	7.5	21.5	25	5.5	34.5	1	14.5	4.5	6
17.25	8	8	10.75	2.5	3.5	7.5	6	38.75	23.25	6.5	31.75	1.25	13	3.5	8
19	9	9.5	14.5	0.25	4.25	8.75	6.75	24.25	20.25	3.75	27.25	0.75	19.25	7.25	3.75
21.75	13.25	5.25	13.75	5	5.75	6.25	6.25	41.25	27	5.75	24.25	2	19.25	2.5	9.75
25.25	16.25	11	14.75	7.75	7.5	7.5	8.25	43.5	23.25	9.25	30.5	2.5	12.75	4	9.25
17.75	11.5	12.25	12.75	1	7.75	5.75	6	47.5	20.5	10	36.75	2.5	10.5	4.5	8.75
11.75	5.5	6	8.75	0.5	4	4.5	2.5	17.25	21.25	2.25	24.5	1.5	5.75	3.5	5.75
18.75	6.25	10.25	12.75	1.75	1.25	5	7	30	21.25	3.25	17.5	1.75	11.75	3.25	8.25
21.5	6.25	7.5	8.5	0.75	2.5	6.75	6	33	22.25	6	19.25	1.25	11.25	2.5	6.5
20.75	7.75	11.5	11	0.5	1.5	5.25	3.75	54	25.25	5.75	32.75	1.5	14	2	9.25
17.75	6.25	8	9.75	0.25	4.25	8	3.75	29.75	24.5	4.75	31.5	1.5	25.5	3	8.75
21.5	4.75	11	10.5	2.25	3.5	5.5	4.5	28.5	24.25	4.5	33	2	15	3.25	3
26.25	12.25	13.5	14	2.25	6.25	3.75	6.75	24.75	29	8.25	44.75	2.75	19	4.5	9.25
21.75	8.75	14.25	12.25	0.75	5.5	8.75	7.5	44.25	17	11.25	27.5	1.5	15.75	2.25	11.75
19.5	7.25	12.75	8.75	2.25	3.75	9	8.75	22	24.75	6.5	32	2.75	20	1.75	5.75
14.75	7.5	4	11.75	1.75	3.75	6.75	5.75	36.5	26.75	2	28.25	0.5	12.75	2.75	5.75
12.25	4.25	7.5	4.5	1	3	7.25	2.5	28	20	3.5	22.5	0.75	13.75	1.5	9.5
14.25	8	6.25	8	1.25	2	6.5	5.75	35.25	16	6.5	18.25	2.75	10.5	3.25	5.25
14.5	10.25	11.25	8.75	2	8.25	8	5.5	34.25	16.75	8	15.25	1	5.5	3.25	7
19.75	5.75	11.25	13.25	1.5	3.5	4.25	4	31.25	20.25	3.25	26.5	0.5	17	1.5	9
13.25	11.5	12.75	12.25	2	5.75	5	5	28.5	22	4.75	26.25	1.5	12.5	2.5	8.5
18.5	5	14.5	8.5	1	1.25	3.5	4	47.75	31.5	5	41.75	1	18	3.5	7.75
29.75	8	14	8.25	1.75	3	6.25	7	38.75	21.5	7.75	37.75	2	21.75	1.5	11.75
21.25	12.25	7.75	13.5	1.5	6.5	4.25	6.5	28.75	26.75	6	34.5	1.25	14.75	3.25	6
20.25	6	14.25	8	1.5	2.5	9.25	3.75	20.25	21.5	6.5	39.25	1	21.5	2.75	7.25
23.5	7	17.25	14.5	0.75	5.25	10.5	10.25	48.25	20.25	9.75	45.5	3.5	24	3	11.25
26.75	5.5	15.75	18.5	1.25	2.75	8.5	6.75	25.75	24.25	6.75	36.5	2.75	27	2	6.5
18.25	3.75	8	14	0.5	4	5.75	8.75	31.75	25.25	5.75	44.5	0.75	20.25	1.5	9.75
26.25	4.25	17.75	17	1.25	5.25	8.5	10.5	33.25	31.25	9.5	46	2.5	17.25	4	7.5
25.25	8.25	9.5	22.75	1.75	5	8	12.25	21.25	21	7.25	24.75	3.25	9.5	2.75	7.5
53	8.25	25.5	28	1.25	7.25	8.5	23	20.75	36.75	6.25	58.25	5.25	41.25	3	10
27.75	4.5	26.75	20.5	0.5	5.75	13.25	14.75	17.5	42	7.5	47.25	1.25	34	1.75	6
20	4.75	24.5	15.75	1.5	3	13.25	8.75	8	29.75	4.5	21	0.75	9.5	2.5	0.5
26	9.5	16.5	25	0.75	7.25	18.25	19.25	34.75	22	10.25	36.75	3	13.5	4	4
37	4.75	12.75	20.5	1.5	4.25	15.5	12	39	36	11.5	66.5	2.5	27.5	5	8.75
51	15.25	23.25	29.25	3.25	13.75	31.5	32.5	24.5	30	11.75	57.75	2.5	23.75	9	8.75
31	13	22.5	29.5	0.5	9.25	28	24.25	10	18	4.75	25.5	2.5	14	3	4
32.25	16.75	18.25	22.75	1	11	27	25.25	3.5	22.25	9	38.75	3	17.75	4.75	5.25
27.25	14.5	14	26	1.5	8.25	26.25	13.25	3.75	24.5	6.5	41.75	2.25	13.5	5	4.25
19.25	13.5	13.5	21.75	1.25	7	21	13.5	15.5	19.75	6.5	27.5	1.75	15	5	4
32.25	22.25	15.5	19	1	7.5	23.5	18.25	9.5	26.75	4.25	32.25	2	20.25	5.5	4.25
55	4.5	17.75	12.25	1	4.75	9.25	14.5	7.5	22.75	7.25	35.5	3.25	17.25	7.5	7
24.75	2.75	13.25	10.75	0	3.75	16	5.25	12	21.25	8.25	24.25	2	13	7	1.75
21.25	2.25	7.25	2.25	0.5	3	13.75	1.75	4.5	20.5	2	21	0.75	8.5	2	2
18	0.5	9.75	7.75	0.25	2	13	2.25	8.75	26.75	3	27.5	0.5	12	4.25	3
18.5	4.25	9.75	4.5	0	1	9.75	3.25	19.25	24.5	3.25	21.5	0.5	18	4	5.25
10.25	1.75	9	3.75	1.75	1.5	7.25	4.25	40.5	36	3.25	19.75	2.25	16.75	3.75	6
22.25	6.5	8.75	9	0.75	4.5	7.5	5	37	19.5	6.75	27.25	2.5	15	6.5	9.75
20.75	4	4.75	8.75	2	3.5	10.25	8.5	32.5	26.25	6.5	32.75	2.25	10.25	5.25	8.5
17.5	6.25	14	11.75	2.25	3.5	13.25	6.5	21.25	28.75	7.5	21.75	1.5	11.5	2.25	6.25
16	4.5	4.75	8.5	0	2.75	10.25	6	5.5	22.75	6.25	15.5	1	13	6.25	3.75
15.25	9.25	5.25	10.5	2.5	3.25	5.75	6.5	26.5	17.5	6.25	27.75	2	22.25	4.75	3.5
30.25	15.5	15	17	3.5	5.75	5.5	9	54	28	8.5	39	2.25	23.25	5.25	8.5
23	7	11.75	14.5	1.75	3.25	9	10	34.25	36	4.5	26.25	1.25	19.5	2.75	5.5
15.25	6.75	9.5	10.5	1.25	3.5	14.25	3	13.25	26	5.25	23.75	0.5	18.5	4	5
11	13.5	11.75	9.75	1	7.25	8.75	6	26.25	19.5	3.5	25	1.25	17.25	2.75	4.5
20.75	10.5	7	11.25	2.25	4	6.25	5	42.75	25.5	6	33.25	2	16.25	3.5	9.5
12.5	9.75	6.25	14	1.25	6.5	9	6.75	25.5	23	7.25	17	1.5	7.25	4	7.5
17	10.25	10.75	11	1.25	6	7.25	5.5	54.5	23	8.5	23	1	7.5	1.75	7
16.75	10.25	7.75	11	0.75	5.25	7.75	6.75	36	21	3	20.25	2	16.5	2.75	4
24.5	6.25	12.25	11.25	1	5	8.75	5.25	55.5	29	6.25	37.75	1.75	19.25	2.5	9.75
22.5	5.75	11	15.75	2.5	2.25	9.75	6.5	28.5	29.5	8	49.75	1	18	4.25	9
20	3.5	8.25	6.75	3.25	5.5	10.75	6.5	15.25	23.5	4.25	31	1.75	17.5	3.75	6.25
27.25	9.75	16.25	14.75	3	8	10.5	6.25	38	31.25	13	37.25	3.75	22.25	3.25	12.5
18.5	7.25	10.5	10.5	1.25	4.75	9.5	7	38.25	27.5	7	43	1.5	19.25	6	12.5
10	5.25	3.75	10	1.25	6	4.5	6	32	16.75	3	25.25	1	17.5	1.75	4.75
18	9.25	9.75	12.25	1.5	3.25	4.75	5	29.75	15.75	3.75	16.5	1	10.75	1.75	5.5
12.25	8.25	8.25	9.5	2.5	6.25	6	5.5	36	21	4.5	27.5	1.25	12.5	3	5.25
19	6.25	7	14.25	3.25	4.75	6.25	5.25	30	20	3.25	27	0.25	9.75	4.5	6.75
18	2.5	5.5	6.25	1.25	2.75	5.75	3.5	39	17.5	2.5	18.5	1.5	11	1.25	8.5
22.25	1.5	4.5	4.75	0.75	3.5	9.25	2	39.75	25.5	4	16.75	1	8.25	2.75	3
17.75	2	12.5	3.75	1	2.5	5.5	2.25	40.5	25.75	2.75	35.25	1	16.5	4.25	4.75
18.25	6.25	9.5	11	3.25	2.25	13.5	5	15	23.25	3.75	24.5	0.75	13.75	5.25	6.5
16.75	14	9.75	10.75	4.5	5.5	6.25	7.75	45.5	19.25	6.25	20.75	1.5	16	4	7.25
21	12.25	9	13.25	3.5	3.5	4.25	5	30.25	18.75	3.75	24.5	0.75	8.25	1.75	6.75
27.5	2.5	7.75	7	1	3.75	6.75	2.75	6.25	18.5	3.75	23	2.25	14.25	2.25	5
17.5	4.75	5	6.75	0.5	3.5	6.25	4	21.25	17.75	2.5	22.5	0.25	10	2.75	5.75
14.25	9	10.25	11	0.5	5	7.5	3.75	25	19	5.75	19.75	2	10.75	1.5	6.25
18.25	10.25	16	10	1.25	4.25	4.5	5.75	64.75	20.25	9.75	24.25	2.25	15.25	2.75	7.5
22	10	4.25	7.25	2	3.75	8.25	4	29.25	19.5	1.75	25.75	1	17.5	3.5	5.5
16	11.5	4.25	10.25	3.25	7	5.5	5.5	26.75	16	6.25	16.25	1.5	7.75	7	4.25
21	10	16	13	1.5	2.75	5.25	6.75	33.75	28.75	5.5	28.5	1	15.5	2	7
21.75	7	16.75	13	2.5	5.25	5.75	4.5	41.5	21.25	7.25	34.5	1.25	14.5	3.5	10
29.5	8.5	11.5	15.75	4.5	5	7.5	7.5	13.25	21	4.75	32.75	1.5	16.75	3.5	8
15.25	4.25	17	12	2.25	4	8.75	2.75	46.25	35.75	6	36.75	0.75	14	2	12.75
14.25	7.25	14	8.5	1.5	5	6.75	5.5	41	20.75	4.5	31.5	0.75	14.75	2	7.75
21.25	7.75	14	9.75	3.25	5.5	8.75	6.75	35	19.75	5.5	36.5	1.25	17	1.5	9
25.5	10	8.5	9	0.75	4.25	5.25	5.75	25	20.75	8.25	37	2	19.5	2.75	5
25.5	3	11.25	8.25	1.25	2.75	3.75	7.5	26.5	31	5	42.5	0.5	20.25	1.5	9.25
18.25	5.25	17.25	15.5	2.75	1.75	6.25	4.25	35.25	32.75	5	37.75	1	16	1.5	6.5
23.25	8.5	12.75	10.5	2	4	11	7.5	49.5	27.25	8.5	45.25	2	17.5	6	13.25
18.25	8.25	11.75	15.5	1	3	11.5	6.75	34.25	17	7.25	23.75	1.5	12	1.5	9
18	11.25	16	18	1.25	9.75	18	19.5	22	13.5	5.25	28.5	1.5	15.75	3	5.5
40	11.75	18.75	19.75	1.25	10.25	28.5	11	5	20.5	4	29.75	2	16	4.5	7
22	18.5	18.25	22.75	0.5	10.5	30.75	16.25	12.75	19.75	3.75	29.25	2	19.25	3.25	6.5
17.5	11.5	20.5	15.25	0.5	7	14.5	14.5	8.75	23	5.5	39	1.25	14.25	1.5	3.75
18.5	12.75	14	23.25	0.75	6.5	16	20.25	19	21	3	28.5	1.75	9.5	1.5	2.75
14.75	1	7.25	6.75	0.25	0.5	5.25	7.5	6.5	10.25	2.75	19.5	0	6.5	1.5	3.5
26	2.75	12.25	10	0.5	6	13.5	9.75	7.75	18.5	6.75	20.75	4.5	7	9.75	3.5
19.5	1.5	5.25	9.5	1	1.25	11.25	4.5	5.75	15.25	5	15.5	1.25	13.5	6.5	3
20	2	11	8.75	0	2.25	15	2	10.75	16.5	3.75	21	1	11	2	3.25
29.75	7.75	16.5	20	1.75	8	16	11	5.75	24.75	10	24	4	9.25	9.25	5
39.5	19.5	17.75	24.5	2.5	8.5	22	14	11	25	9.5	23	5.75	16.75	10.5	6
23.75	3.5	4.25	9.5	0.25	1.75	18	2.75	3.5	24.25	3.25	28	0.5	15	2.5	5.75
50.5	9.75	13.25	17	0.75	5.75	16.75	6.5	9.5	22.5	6.75	23.25	3.5	11.75	6.75	4
41	12.25	19	24	1	12.25	24.5	12.75	22.5	24.5	17.25	28.25	4.75	15.5	10	7.5
29	22.25	22	24.25	1.5	9	30.25	13.25	31.25	18.75	9.75	26.25	6.75	17.25	8.75	6.5
59	23.5	22.25	26.75	2.75	9.75	24.25	11.5	35.75	29	14	48.25	2.75	21.75	10.25	11.75
49.25	16	20.75	23.5	4.5	8.5	21	13.25	35.5	28.5	11	42.25	5.25	28.5	8	11.5
31.75	21	32.75	24.75	7	11.25	29	16.25	41	39.75	22.25	46.25	8	17.25	18	15.5
74.25	10.75	30.25	23.25	1.25	9	18	11	60.5	43.25	21.75	82.5	5	38.75	16.25	18.5
47.5	19.5	45.5	39.5	5.5	24.25	31.75	30.25	45.5	43.75	26.75	50.25	14.25	30.25	34	14.5
37.75	16.75	23.5	22.5	4.25	12.75	23.5	23.5	45	33.75	18	49.25	8	23.75	16.75	13.75
37.75	21.5	24.75	24	3.25	13.25	27.5	12	52.75	32.25	21.25	39.75	9	18.25	13.25	14
58.5	7.25	21.75	31.25	3.25	5.25	18	11.5	42.5	31.75	15.75	60.5	7.75	33.5	10.5	15.5
45	9.25	24.5	29.5	4.5	9.5	22.25	11.75	28.5	37.5	16.75	55.5	6	31.75	10.5	11.75
39	4.25	11	20.5	2.25	4.75	14	10	23.5	37.5	11.25	52	4.75	30.25	5.75	7
23	2.5	7.25	12.5	0.25	4	14.5	7.75	8	30	6	22.75	3.5	16.75	3.25	8
20.25	11	6.75	12	0.25	3	8.75	9.5	12.75	27	3	27.25	0.5	11	2.75	5
19	5.25	8.25	15.5	1.5	3	12	4	9.5	31.25	11	25.75	2.5	20.5	4	6
13	1.25	9.25	8	2.75	2.5	9.75	3.75	29.5	28.25	11.25	30.25	1.75	20	6	6.5
19.5	6.25	7.25	15.5	0.5	4.5	17.5	6.5	15.5	25.75	8.75	17.75	1.5	12	3.75	3.75
19	4	5	12.5	0.75	4.75	14.25	7.75	23.75	26.75	7.25	27.75	2.5	15	2.75	8.25
19	5.5	5.5	10.75	0.5	3.75	7.5	10	27.25	25	6	25.25	2	17.75	1.5	4.5
20	9.25	6.25	11.5	1.75	6.75	9.75	7	24.5	19.75	6.25	33.75	1.25	13.5	6.5	7
16	7.25	14.25	14.25	1	2	15.25	5.5	28.75	24.75	8	27.25	2.5	12.75	4.5	6.75
14.75	7.25	11	14.25	2	7.25	11.25	6.75	38.5	23.75	5.25	33	2.25	23.25	5	4
20.5	15.25	9.25	13.5	2.5	11	6.75	8	29.25	22.5	6.25	25.75	1	8.75	4	7.75
11.5	3.5	5.25	12.5	0.25	3.75	9.75	5.25	39.75	18	3.5	27	0.75	14.75	6.75	9.75
17.25	13.25	16.5	15.75	2	8	9.75	9.75	23.25	21.75	4.25	15.25	1	8.25	4.75	4.75
11.5	5.75	7.5	13.25	1.25	3.75	9	6	36.5	25.75	4.25	33	1.75	20.75	2.5	7.75
13.5	16.5	7.75	14.5	2.5	6.75	6.25	10.25	20.5	19.25	7	23.25	1.5	11.25	3	5
20.75	14.75	9.75	13.5	1	4.5	11	7.25	48.5	32.25	10.25	26.75	2.75	17.5	5.75	8.5
28.25	5.75	12	14.5	0.75	5.25	10.75	3.75	30.75	32.75	5.5	36.75	1.25	22.75	3.75	9.5
30.25	12	10.5	11	1.5	3	9.25	3.75	39.75	28.5	8	36.75	2	22	5.25	9
5.75	7.75	3.25	7.5	1.75	5	11.5	3.5	16.25	13.25	3.25	11.25	1.25	4.5	6	3
18.75	8	5.25	9.25	0.5	4	9.25	4.75	28	15.5	4.5	18.5	2	15.25	2.5	5.25
10.25	9	4	9.75	2.25	2	11	4.25	14	22.25	3.5	14.75	0	10.25	2	4.75
14.75	8.75	10.75	11.75	2	3.75	11.75	4	44.5	22	6.75	22.25	2.5	9	3	6.75
24.25	7.25	6.25	11	4.75	4.25	9.5	9.25	34	31	4	36.75	1.75	13.25	5.25	6.25
27.5	4.5	9.5	12.75	1.75	3.5	7.5	3	26.5	22	4.75	33.75	1.5	17	1.75	5.25
9.25	8.25	3.5	10	0.25	6.75	10	4.25	31	20.5	1.25	16	1	17	6.5	5.75
15.5	9	7.25	10.75	1.75	4	6.5	8	30.25	15.5	6	21.25	1.75	16.25	4	3.75
20.75	5.75	8.5	11	3	4	7.5	3.5	44.75	24	5.5	31	2.25	15	6.25	4.75
17.25	4	8	9.25	1.75	3.75	8.5	4	25	14.75	4.5	29.5	2.5	9	2.75	6.25
17	9.25	9.25	9.75	0.5	6.5	8.25	7.75	25.75	27.5	5	28	1.5	14.5	1	7.25
22.5	7.25	7	12.5	1	2.75	8.5	4	31	33.25	4.25	24.75	1.75	17	2	4.75
33.25	8.25	9.75	8.25	1.5	4	7.25	5	45.25	29	6.75	29.25	2	21.5	1.75	5.5
15.75	7	12	14.5	0.25	7.5	6.5	5.25	25	22.25	7.25	25.75	3.25	8.5	2	5
17	10	7	10	1	6.25	8.5	5.25	40.5	22.5	5.25	30.5	2	12.5	3	10.25
30.75	9.5	18.5	14.5	3	7	10	4.75	35.5	34	7.75	45.75	1.25	21.5	2.5	9.5
24.25	4.75	14.75	11.25	2	3.5	11	6.25	52.5	27	5.5	43.25	1.5	21.25	3.75	11
31	4.5	15.25	10.75	2.25	4.25	12.25	5.75	15.5	28.5	3.75	38.25	1	23.5	2.75	5.75
19.5	9.75	12.75	15.5	1.5	5.75	11	6	39	29.25	12.75	36	3.25	16.75	5	11.25
15.25	14	10.75	14.25	0.5	5	9.75	9.25	31.5	21.25	5	29.75	2.75	16	3.5	7.5
28	3.75	15	7.25	0.75	2.75	12	4.25	14.5	20	7	22.75	2.75	11.5	3	5.75
17.5	1.25	7.25	5	0.5	2.25	11	4	13.75	14.25	1.75	27.75	1.5	10.5	2.75	4.5
16.25	11	5.5	9.25	2.5	4.25	8.5	4.75	20.5	20	3.25	18.25	2.75	7.5	3.5	3.5
21	5.75	5.5	8.75	1.25	1.75	8.75	4.5	30.75	26.5	4.75	21.25	0.5	15.25	2.75	3.5
15	8	7.75	15.5	1.25	6.25	7.5	7.25	38.75	30.75	7.75	30.5	2.25	13.25	6.25	7.25
24.5	9.25	7.25	11.5	3.75	3.5	10	8	30.5	25	5	31.75	0.75	20.75	3	9.75
21.5	8.75	16	12.75	3	2	14.5	6.25	37.5	27.25	3.5	25.25	0.75	14.5	3.75	7.25
13.25	5.25	4.5	14	2.25	3.75	9.25	4.75	24.25	20	5.75	19.75	1.25	11.75	5.25	6.5
14	8.5	17	8.5	0.75	3	5.75	3.75	43.5	25.75	6.5	30.5	0	21.75	3.5	5.25
22.25	9.5	13	10.5	2.25	5.75	7	6.25	30.5	20.5	4.25	24.75	2	9.25	2.5	7.5
21	6.75	13.5	15.5	1.75	4	5.75	6.75	25	26.75	3.5	30.5	1.25	14.25	2.5	7.5
20.5	7.5	14	7.25	0.5	3.5	7	6.25	36.75	31.75	4.75	39.75	0.75	24.25	1.75	6
15	11.75	9	8.75	1.5	6.25	8.5	3.25	43.5	19.5	11.25	18.75	2	9	2	6.25
16	9.5	12.25	12	2	4.5	9.5	3.5	29	18.5	6.25	22	1.25	15.25	3	5.25
21	9.25	6.5	10	4	2.25	5.5	7	37.5	19.5	2.75	24.25	1.5	18.25	3.75	4.5
18.5	14	17.25	12.25	1.25	5.75	8	6	32.5	22	4.5	29	1	17.75	3	6.25
27	10.75	21.75	14.25	1.75	3.25	10.75	3.75	27.5	25.25	6.75	35.25	1.5	11.75	3.75	13.25
21.75	6.5	11.5	12.5	2.75	4.5	10.75	7.75	30.5	30.5	4.75	37	1.75	16.25	3.25	6.75
16.75	6.75	9.5	16.5	2	6.25	8.5	7	23.75	33.25	4	43.5	2.25	16.25	2.75	7
11.5	2.75	6.75	4.75	1	0.75	7.5	1.75	51	28	3.5	26.25	1	9	2.25	5.25
22.5	6.5	8	9.5	1.75	3	11.75	3	35.25	14.75	2.5	18.75	1.25	14.75	2.75	7.25
8.25	7	5.25	11.25	0.5	3.75	12.25	5	23.75	18.25	3.25	16.25	0.5	11.75	1.75	5.25
14.25	8.25	11.25	16	1.75	2	10	7.5	45.25	26.25	3.75	24.25	0.75	12	1.25	8
22	6.75	11.75	9.75	2.75	2.5	10	4	37.75	27.25	4.75	27	1	14.25	1.5	8
17.25	11.5	10.75	13	1.5	5.75	9.5	5	13.75	16	4.75	16.25	1	11	4	5
21.75	3	8.75	14.5	0.5	2.25	8.5	4.5	21	23.25	2	35.25	0	22.75	2	5.25
26.75	9.5	14.5	14.25	1	6.5	10	6.5	31.75	27	8.25	31.75	1.75	18	1.75	5
24.5	7.5	15.25	12	3	4.75	7	6.5	40	24.75	8.25	45.25	2	23	7.5	9.5
23.5	9.5	12	12.75	1.5	4.75	10.25	5.75	18.5	26.75	6.25	51.25	0.75	12.25	5	6.75
19	6.25	15.25	13.25	1.25	3.75	12	6.75	18.5	29	10.5	41	1.25	21.5	3.25	7.5
22	8.25	8.25	17	2.25	4.5	13.5	9	28.25	30	8.25	39.75	2	29	4	8.5
26.25	6.75	14.5	23.25	0.25	4	15.25	13.75	42.25	27.75	7	49.25	2	24	3	10.25
12	6.75	14.75	17.25	1	5.25	13.5	10.25	15.25	15	3.25	28.75	1.5	12.75	1.75	1
27.5	16.5	21	26	0.75	17.25	24.5	23.25	20.25	22.75	4.75	27	2.75	20	4.25	1.75
41.5	20	23	27	2	12	34	15.5	12	21.75	11	37	2.5	18.25	5.25	5
25.75	12.25	18.5	15	0.75	5.25	26.25	9.25	13.25	20	5.75	38.25	1.75	15.5	5.5	4.5
14.75	9.75	22.25	24.5	0.75	5	18.5	8.25	62.5	26.25	13.75	32.5	3.75	12.75	4.5	8.25
18.5	13.25	12	28	1	6.5	26	17	23.5	23.75	6.25	28	1.5	14.5	5.25	4.5
30.5	14.5	12	25	0.25	10.5	25	26	6.75	21	5.75	39	1.25	16.75	7.25	4
43	14.25	24	32.5	0.5	11.5	23.25	23.5	37.5	32	16.5	63	4.5	20	4.5	11.5
31.5	15.5	31.5	30	1.25	17.75	30.25	19.75	28.25	44.75	11.25	78.75	2.75	24.25	8.75	14.5
33.5	11.75	32.75	36	1.25	7.25	21.75	21.5	36.75	41.25	14	57	2.25	18.25	6.25	12.25
29.75	12	29.75	26.75	2.25	8	25.25	22.25	19.25	38	8.75	61	1.25	20	4.25	9.75
24.75	10.25	22	29.5	0.75	5.75	19	13.25	15	24	6.5	47.25	1	20.75	7	9.25
33.75	17.75	26.75	24	1	11	28.25	16.75	9.5	21.75	7.75	24.5	3.75	16.75	5.5	3
47.75	26	37.25	28.25	2	12.5	34.25	29.75	18.5	31	14.5	47	4.25	25.75	7.5	5.5
71	7.25	22.25	16	2	3.75	16.75	6.75	19.25	29.25	10	52.75	3.75	22	4.5	12.5
32.75	1.75	14.75	11.75	0.75	1.5	19.5	3.5	12	20.75	7.25	20.5	3	10.5	4	7.75
23.25	0.5	4	4.75	0	1	9.75	6	17	25.25	4.75	22.5	1.25	15.75	2.75	6
25.5	2	11.25	6.5	0.75	1.25	9.75	7.25	19.5	21.75	3.75	21.75	1.75	20.5	3.75	8.75
10.25	5.25	5.75	4.5	1	1	12.5	3	27.5	28.5	9	24.75	1.75	13	4	11
22.75	5.75	9.25	8.5	6.25	4.25	11	8	21.5	26.25	6.25	39	2.25	20.75	3.75	9
15.75	3.25	13	10.5	2	6.5	5.75	14.5	18.5	32.25	5.75	40	3.5	14.5	9.5	5.75
12.75	9.5	6.75	14	0.75	2	5.25	5	15.5	18.75	4	26.25	0.75	11.5	3.5	4
24.75	5.5	11.75	8	3.5	1.75	7.5	6.5	48.5	23	8.25	31.5	1.25	12.75	2.75	9.75
20	8.25	19	13.5	1.5	5.5	11.75	7	48.75	38	8.75	32.75	1.75	24	3	11
25.25	9.5	13.25	15.5	3.25	4.5	12.25	12.75	48	33	6.25	31.5	2	14.25	3.5	10.5
30.25	4	9.25	9.25	1.5	4	13.25	3.5	15	31.25	8.5	22	2.5	14.5	8	7.25
12.25	3.5	3.25	7.25	0.5	3.25	11.75	3	19.5	19.75	4.25	17	1	7.75	5	4.25
29.75	4.25	25.5	14	1	7.25	13.25	10.5	19.5	32.5	13	52.25	3.75	17.25	4.25	12.25
33	4.25	32.5	18.5	1.25	3.25	13.5	5.75	59	48.25	20.5	93	3.75	44.25	8.75	23
49.25	2.25	16.75	10.75	0.25	2	8	4.25	29.5	55.25	18	96.75	3.25	39.25	13.75	21
39	3.75	12.25	12.25	0	1.75	7.75	6	41	51	15.25	88	2.75	17.5	6.5	22
40.75	1	19.75	10.75	0	3.75	8.75	4	47.75	44	16.75	99.25	3.5	27.75	7.5	21.25
37.75	2.5	23.25	13.5	1.25	5.25	11	8.25	39.5	50	17	78.75	4.25	29.75	8.5	19.5
25.75	2.75	13.75	11	0.5	4.5	10.25	7.5	35.5	47.75	16.5	76	3	25.25	10.25	22
27	3.25	11	11.5	1	3.5	7.75	5.5	23.75	40	15.75	56	4	28.5	7.75	13.25
43.25	16	27.25	24.25	2.75	8.75	20	8.25	39.5	52.25	27.75	70.75	6.25	29.25	9.5	23.25
41.75	24	24.5	28.75	1	8.25	27.75	9	31.75	37.75	17.25	43.25	5.5	23.25	10.75	15.75
17.5	3.75	4.75	10.75	0.25	1.75	14.25	10.25	13.75	25.75	4.5	21	4	14.25	3.5	12
11.5	10.5	11	14.5	1.25	6.25	13.5	5	15.25	25.5	6.75	12.25	0.75	10.75	3	11.25
18	11.25	13.5	19	1.75	6	16.5	8	26	21.75	8.75	20	1.75	11.25	2.25	7.5
16	6.25	3.75	11	1	4.5	8.75	7.5	15.75	20.75	4	26	2	10.75	8.25	5.5
14.25	6.75	11.5	13	0.25	5.5	12.5	7.75	27	20.5	3.25	21.75	0.75	14.25	2.5	5.25
17.25	4	8.25	11.75	1	2	13.25	6	29.25	29.25	5.75	36.75	2.5	14.5	6.5	9.5
16.25	8.5	11	16.5	1.25	5.75	12.25	9	21.25	21	5	16.75	1.5	10.75	4.25	2.5
16.75	11.25	14.5	13.5	1.5	7.5	8.75	4.25	41.25	31.5	5.5	38.5	2	14.5	5.25	10
20.5	8.5	21.5	11.5	3.25	4.5	12	7.25	48.75	25.25	8	32	2	10.75	3.5	7.5
11.5	2.5	6.75	9.25	1.25	1.25	13.25	2.5	18	19	2.5	24.75	0.75	14	4.25	6.5
12.75	4.75	2.75	12.25	2.25	4	8.5	8.25	20.5	17.5	4.5	17.75	1.75	8.75	4.75	3.75
14.25	8.25	14	11.75	3	4	9.75	8	44	23.5	6.25	15.25	2	11	2.5	6.75
21.25	8.5	10	14	1.75	3.75	11.5	5.25	44	26.25	5.5	29.75	2.5	14.5	2.25	7
29.75	6.25	10.25	8.75	2	4	10	4.25	25.25	32.75	6.25	24.75	2	15.25	1.75	7.25
36.75	8.25	24.75	14.25	2.5	3.5	10.5	7.75	28.5	29.75	13.25	49	3.25	30	8.75	11.75
8.75	8	4.25	10.25	0.25	2	15	5.75	6.75	20	5.25	21.25	1.25	10.25	2.75	4.25
17	7.5	6.5	10.75	1	3.25	10.25	5.5	14	23.75	5.25	24	1.25	14	3.75	3.75
9.5	9.25	13.5	14	1	5.5	8.5	4	22.25	25.75	4	22.5	1.75	25	3	6.5
19.75	4.5	11.75	11.25	2	3.5	5.75	6.5	51	21.25	4.25	36.75	3.25	22.25	2.75	7.25
21.25	9.25	7.75	11.25	1.75	5.75	10.75	10	33.75	26.75	5	21.75	2.25	14.75	2.75	4
33.25	13.5	15.5	14.75	2.75	6.25	14	7.25	42.5	25.75	7.25	39.25	2.5	21.5	4	10.25
19.5	9.25	13	10	2.25	4.75	8.5	3.5	36	25.5	6.75	36	0.5	18	2.25	8.25
18	6.5	11.25	9.75	4	4.25	8.5	3.5	18	22.5	2.5	25.5	1.75	10.75	2	8.25
17	12.25	7.75	14	1	6.5	7	6.25	22.25	19.25	3.25	18.5	0.75	10.75	1.75	6
11.75	3.25	5.75	6.75	0.75	1	11.75	4	27	17.25	3	8.75	0.25	19.5	3.75	3
20.25	10	13.5	16.5	2.25	8.5	9.5	7.5	48.25	20.25	7.75	24.5	3.5	16.5	7	9
19	9.5	17	10.25	1	5	6.75	4.5	55.75	25.5	8.75	25.5	2	16	2	8.75
23.75	9.75	6.75	10.5	1	4.75	8.25	5.5	31.25	25.25	5	30	2	19.75	1.75	4.75
21	8.25	10.75	10.25	2.75	4.5	9	4.75	50.75	28.75	4.75	37	2.75	15.75	3.5	9
17.25	11.5	8.5	12	1	6	10	3.5	30.5	17	6	24	0.75	17.75	4.5	8
14	9.75	9.25	9	2.5	4	7.75	4.75	42	15.5	6.75	18.25	2	14.5	3	7.25
20.5	11.75	12	10.75	2.25	6.5	6	4	38	16.25	5.25	28.75	1	14.25	3.25	5.75
22.25	11.5	14	14.75	2	5	6.25	6.25	16.25	22	3.5	29.75	0.5	13.5	2	4
23.5	6	13	12.5	1.5	3.5	5	4.5	26.75	31.5	6.25	37.5	1.5	18.75	2.75	4.25
21.25	9	13.25	8.25	3.25	4.75	6.25	6.75	55	31.5	11	41	2	15	3.5	15.25
13	10.5	9.5	15	1.5	5.25	8.75	5.5	24	24.25	3.5	30	1.25	15	2	7.5
8.75	1.75	5	5.5	0	1.5	8.75	1.25	23	20.75	0.75	18.5	0.5	16.25	0.75	3.25
18.25	6	7.5	9.75	0.75	4.75	10.75	2.5	30.5	21	4.5	23	0.75	17.5	1.75	5.25
13.25	9.25	5.5	7.5	0	4.25	7.25	7.5	23.75	13.25	4.5	24	1	11.5	2.5	4.75
17.75	9	11.25	10.5	1.5	4	5.5	5.75	45.25	19.25	6.75	30.5	2	18.5	3.5	9.5
16.75	5.75	4.5	10	3.75	4	7	5	29.75	18.5	3.25	31.5	1.25	14.75	2.25	5.75
10.5	9	7.5	11.75	2.25	4.5	8	5.75	23.5	14.25	3.5	18.25	1	9	2.5	4.5
17.5	7.5	16.75	10.75	1.5	5.25	6.25	4.5	46.5	23.25	7.5	29.25	2.25	14.25	3.5	7.25
26.75	10.25	10.75	18.25	2	6.5	8.25	9	26	21.5	5.75	42	0.5	18.25	3.25	10
16.25	6.75	15.5	10.25	1.75	1.5	9.5	2.5	38	33	5.25	40.5	1.5	20.25	3.25	7.75
32.5	9.5	13.5	14.75	3	8	9	10.5	30	28.25	9	41.25	3	24	2.75	9.25
14.25	12.5	14.5	14.5	1.25	4.25	6.5	10.75	35.25	18.75	6.75	29.75	1.75	10.75	1.5	6.75
17.75	18.25	14	12.75	2.75	9.75	8.75	5.25	25.75	27.5	6.5	35.5	1.5	11.5	2.75	7.25
24.5	5.25	6.25	12.75	1.25	5.5	8.75	5.5	26.75	22	3.25	41	1	23	2.5	9.5
15.5	2.25	10.25	6	0.5	3.75	12	2.5	22.5	17	2.25	20	0.5	16.5	2	4.5
12.75	7.25	3	8.75	1.75	5	7	4	26	16.25	4.75	15	1	6.75	1.5	6
18	6.25	7.75	8.75	0.25	3	5.75	2	30	22.5	9.5	17.75	1.75	12.25	1	6.75
14.25	5.5	6.5	10.5	1.25	4.25	5.75	7.25	26.75	13.75	3.5	24	0	12	4.25	5
15	4.5	13	10.75	4	2.25	5.25	2.75	44	29.25	5.25	26.75	1.25	14.25	4.5	9
25.25	9.25	15	13.5	2.25	4.5	13.25	7.25	16	23	7	29.75	1.25	16	1.5	8.5
17.5	9.25	17	10.75	1.25	4	9.25	6.5	47	18.75	10	32.75	1.25	18	2.75	9.75
28.5	10.75	13.25	14.5	2.5	7	6.25	7	28.75	26.25	7.5	37.75	1.5	14.5	4.5	7.5
17.5	3.5	7.5	11.5	3	3	6.75	5.5	23	23.5	3	40.5	0.25	18.5	2.5	7.5
20.75	15	24.5	14.5	3.5	7.5	8.75	6.5	31	22	10.25	35.5	2.5	20.5	2	11.25
20.25	3.75	15.5	8.5	3.25	2.75	9	6.75	54.75	30.75	13.25	51	2.25	17	5	12.75
21.25	8.5	12.5	16.75	2.25	5.25	13	8	18	32.25	9.25	42.5	0.75	17.75	2.25	8.25
27.5	6.5	4.75	11.5	3.5	2.5	5.75	8.5	46.5	26.5	5.5	42	1.5	16	1.75	8.75
17.25	10.75	14.5	20.5	1.75	4.25	12.75	6.5	22.75	19.75	6.75	38.25	1.5	19.5	2.5	3.75
25.25	11.25	20.75	15.25	0.25	3.5	15	6.25	45.75	21.25	12.75	42.75	3.25	17	4.5	8.75
16.5	13.25	17.25	19.5	0.25	5.25	12.25	10.5	39	22.5	6.75	39	2.25	14	4.75	11.75
23.25	5.75	12.5	14.75	2.25	2	11.25	9.5	15.25	23	6.5	31.25	1.75	8.5	5	5.75
11.25	4.25	9.25	10.25	0.25	0.25	4.25	5.5	23.25	20.75	2.75	15	0.5	8	0.75	6
21.5	3	9.5	7	1.5	1.75	15.25	4	7.75	18.25	4	16.25	2.25	11.5	3.25	4.5
16.5	2.25	10.25	7.5	1.5	4	16.25	8.5	12.25	18.25	4.25	25	2.75	6.5	6.25	6
22.25	4.25	10.5	9	1.25	4	14.75	4.25	20.5	26.25	5.25	27.25	1.25	14	3.75	8
26.5	3.75	10.25	8.75	0	1.5	10.5	1.75	7	29.75	3	19	1	9.25	2.75	5
18	3	2.25	8	0.25	0.5	10	3	10.25	27	2.5	19.5	1.25	13.5	3.75	5.75
13.25	18	8.5	15.25	0.5	7.25	9.25	9	30	19	10.5	19.5	1.75	9.75	6.25	4.5
22.5	10.25	11.75	15.25	2.75	5.5	11.5	10.25	41.75	29	7	28.5	2.5	18.5	3.5	7.5
27.5	9.25	9.25	12.25	4.25	6.5	8.5	10	64.25	22.5	7.25	41	3.5	18	7.75	15
15.25	10.25	13.5	15.75	1.5	6.5	11.25	7	45.25	18.5	6.25	19.25	2	13	3.5	11.5
15.25	8.25	12.75	16.75	3	4	10.75	6.5	22.5	25.75	2.75	28.75	0	15.5	2.5	5.75
20.25	12.25	8.25	12	1.5	5	8.25	6	33.75	35.25	8	34.25	1.5	18	3.5	6.25
22.5	7.5	18.75	12.75	0.75	8.25	8	4.75	49	28.5	6.75	43.75	1.25	13.25	3.25	11.75
30.5	9.5	14.5	12.5	2	4.75	6.75	7.25	32.75	23.5	8.25	22	3.25	16.5	3.25	8.75
19.5	7.75	9	10.5	1	3.75	10	3.25	17.75	21.25	5	18.25	0.75	11.75	1.5	5.25
10.75	5	11.25	8	1.75	2.75	10.75	4.25	27.5	21.5	3.75	16	2.25	14.5	4.5	4.25
8.25	3	9.75	9.25	1.25	3.25	9	2.75	34	24.75	4.25	21.25	1	18.25	2.25	5.25
16	12.5	13.75	11.5	0.5	5.25	6.25	6.5	36.5	17.75	5.25	21.75	2.25	14.25	3.25	6.25
17.75	17.5	9.75	15.75	1.75	7.5	7	7.75	37.75	18.75	5	21	1	10.75	4.5	6
24	9.25	13.5	11.25	2	4.25	7.25	7	37.25	18.5	5.25	27.5	1	12.5	1.25	7.25
25.5	12.25	10.75	14.75	2	6	8	8.25	25.25	21	3.25	28	0.25	11.75	1.75	7.25
15.25	6.25	12.5	11.25	0.5	7	7.25	6.25	45.25	23.75	6	30	2	15.5	3	6
23.75	5.25	13.75	13.25	3	5.5	10	4.25	34	26.75	9.25	33.75	2.5	16	2.5	9.5
13	7.5	6.5	7.5	0.5	3.75	8.5	3.25	39.25	18.75	2	28.5	0.75	14.75	3.5	6
17.5	7.5	7.25	6.75	2.25	5.75	4.25	3	26	16.25	4.25	17.5	0.5	15.5	3	3.75
16.25	4	8.25	7.25	2.5	4	7.75	8	23.75	20	2.75	18.5	1.5	10.5	2	7.5
24	8.5	10.5	15	1.5	3.25	5.25	7.5	38	19.75	4.5	29.25	1.25	18.25	2.75	7.75
22.25	6.5	15.75	13	1.75	4.25	6.25	7.5	46	24.75	8	36	1.75	19.25	2.75	7.25
16.75	10.25	12.5	13.5	2.75	5	7.5	9.75	23	18	5	23	1.25	8.75	2.75	5.5
25.5	13.5	20.25	11.5	4.75	5.5	8	4.75	44	24	9.75	47.75	2	17.75	4.25	8.25
32.75	6.75	15.75	10.25	2.25	3.5	7	3.25	31.25	37.5	5.5	54	1.75	17.75	2.25	16
12.5	4.5	9.25	8.75	2.5	1.75	4.25	3.5	37.5	26.25	5.25	26.75	1.25	14.25	2.5	4
10.5	4.5	7	9	0.75	4	6.25	3	31.5	14.5	3.25	16.25	1.25	7.25	3.5	6.75
13.5	7.75	3.25	9.25	1.25	3.5	4.25	5	37.75	15	2.5	22	1.5	9	4.5	6.25
14.5	6.75	9	10.75	0.25	3	7.25	1.75	29.5	20.75	2.25	20.5	1.5	15.5	1.5	5.75
13.5	4.75	5.25	6.75	2.25	2.5	11.25	3.25	25.75	20.25	4.5	28.25	0.5	18.5	1.75	5.5
20.75	7.75	17.75	12.5	3.25	2.25	7.75	4.25	42.75	26.25	1.75	27	0.75	15.75	1.5	6
18.75	9	12.5	11.5	1	7	5.75	3.5	55	21.75	9.75	22	2.5	11.75	2.25	10
27.75	9	11.25	11.5	1.75	2.5	8.25	5.25	48.25	30.25	7	43.25	0.5	23.75	1.75	8
19.75	12.5	17.75	13.5	2.25	6.75	7.75	10.25	31.5	22	9.25	39	1.75	16.75	4.25	8.5
26.75	12.75	20.25	11	2.25	7.75	8.75	6.25	31.25	25.25	9.75	37.25	1.5	13.75	2	8
8.5	6	10.5	7.5	0.75	3	11	2.5	30.5	15.5	2.75	25.5	0.75	11.75	3.75	7.25
12.25	5.25	9	6.5	1	2.75	9.75	2.25	39	22	4.25	27.75	1	11.25	0.75	6.75
19.25	7.75	6	5.5	2.5	5.25	10	3.5	23.5	18.5	5	20.75	0.25	10.5	1.5	6
21.75	6	7	12.25	0.5	6.25	8.25	4.75	20.75	17.5	3.75	21.75	1	13.5	2.75	5
10.5	4.75	5	6.25	1.5	3.5	6.25	2.5	25.25	15	2.5	22	0.5	9.75	4.75	6
25.5	6.25	8	11.75	1.5	4.5	6.75	3.75	38	21.25	3	24	1.5	13.75	1	9.75
18.75	9.75	14.5	13.5	2.25	7.5	6.25	5.75	41.75	19.75	7.25	26.75	1	13.25	4.25	8
24.25	4	8.25	11.75	1.5	4.5	7.25	6.25	30.25	24.75	5	36.75	1	21.25	3	8.5
14.75	5.5	12.5	12.25	0.75	3.25	7.5	5.75	29.75	26	5	36	1	18.25	2.25	7
24	16.75	13.5	9	1.5	4.5	10.5	5.5	16.75	19.75	8.75	26.5	1.5	11.75	1.75	6
25.5	8.5	10.75	12.75	2.25	2.75	4.25	7.25	25.25	21	5.25	35.75	1.25	15.5	2.25	4.75
17.5	7.25	11.75	11.5	1.75	3.5	8.25	5	32.5	35.25	10.25	49.75	1.5	23	1.75	8.25
22	9.25	12	14.5	2.5	3.5	13.25	6	21.75	30	5.5	42.25	1	13.25	5	9.25
27	12	17.5	8.75	2.75	4.75	10.25	7.75	45.75	26.75	5.25	33.75	1.75	19	2.25	9.75
16.5	11.25	11.5	12.25	2	4.5	14.5	18	25.5	16.75	4	34.5	0.75	14.5	2.25	9.75
22.5	7	15.25	17	1.25	4	8.75	15	35.5	37.5	6.75	56.75	0.75	17	3	10.5
19.25	5	10.25	16.5	1.75	1.5	11.75	6.25	45	18	5.75	28	1.5	22.5	1.5	7.75
16.75	7.75	15.75	22	1	2.75	16.5	11.25	32.75	16.25	9.75	26.75	2	12.5	2.75	2.75
23.75	7.75	16	19.5	0.25	4.5	22.25	19.5	14	18	6.75	35.75	2	12.5	4	2.75
33.75	12.25	27.25	24.25	0.25	10.25	22.75	18.25	35.25	22.5	11.25	35.75	4.5	16	5.25	4
21.25	19.5	17.75	26.75	1	8.5	22.75	22	9	14.75	5	31.5	1.5	24.75	2.75	4
34.5	13	20.5	32	0.5	12.75	29.25	22.5	6.5	22.5	8.25	42.25	3	22.5	5.5	5
41.75	13.25	26.25	22	0.25	6.25	23.75	17.25	14.75	32.25	11	37	3.75	26.5	4.25	6.75
40.25	10	22.5	27	1	8.5	19.75	17.25	30	28.75	14	39.25	7	23.5	6	7.5
39.75	10	25	33.5	1.5	12.5	28.75	22.75	45	27	14.5	54.75	5.25	29.5	7	12.75
40	11.25	20	25	0.25	10	17.25	15.5	22	30	13	62.5	1.75	32.75	4	7.5
29.25	8	20.5	33	0.75	9.5	24.25	16.75	21.5	32.5	5.75	57.5	2.25	25.25	4.75	12
45.25	22.75	21.75	26	1.75	11.25	23.25	25.75	29.5	29.75	12	87.75	3	31	6.25	10.5
46.25	17.75	30.25	27.25	4.5	14.75	26.75	26	37.25	35.25	17.5	71.75	3	24	5.75	11
20.75	19.5	19.5	27.25	1.5	8	18.5	16.25	11.5	23.75	4	21.75	1.5	12.25	2.25	5.5
34.5	4	22.5	9.75	0	1.5	11	6.25	14.75	20	7.25	29	2	13.75	4.25	7.25
20	2.5	12.75	10	0.5	2	18.75	4	10.75	24	11.75	28.75	2.25	10.75	6.5	8
16.75	1.5	3.5	4.5	1	0	20	2.5	7.75	24	4	18.5	0.25	9.75	3.5	4.5
18.75	0.5	10.75	7	0.5	2	14.5	5	7.75	22.75	4.5	25	1.75	9.25	2.75	3.5
22.25	3	15.5	7.75	1	1.75	17.75	7.25	39.25	31	4.75	32	2.25	25.75	7.75	9.5
20.75	3.25	20.25	12.25	1	1.75	9.25	4	25.25	33.5	5.75	33.75	2.25	17.25	5.5	6
18	5.75	14.5	10	5.25	5.25	11.75	6.5	35.75	27.25	4	16.5	2.5	15.25	4.5	5
27.75	17.5	17.5	15.25	6.25	5	12.5	15.25	59.75	27.5	7.75	38	1.25	18.25	3	12
26.5	13.5	23.5	19.25	5	9.75	13.5	14.75	43	31.75	11	43.75	4.75	19.25	11.25	13.5
10	12	28.25	12	1.75	6.25	12.25	8.25	47.5	20	6.75	19	2	14	3.75	9.25
14.5	12	17	9.25	1.5	11	5	6	45.5	20	7.75	22.75	2.5	19.25	2.5	8
20.75	7.5	9.25	12.25	2.25	3.75	9	4	33.25	24.5	5.5	25.75	1.25	19.25	2	8
23.75	7.75	12.5	10.5	1.25	3	18	4.5	14.75	24.75	6.5	22.75	1	17.75	3	3.25
32.5	4	12	15.5	3.25	4	14.75	10	41	39.75	11.5	51.5	3	23	5.5	11.25
23.25	16.5	24.5	30	1	15.75	20.25	28.25	18.25	16	8	27.5	4	16.5	3.25	3.5
24.25	13.75	19.75	18.25	1.75	6.5	28.75	17.75	39.75	26.25	22.75	22.25	4.5	10.25	5	7.5
23.75	17.75	27.25	22.5	1.75	9.75	33.5	21	29.25	24.75	13.5	29	3.25	17.5	5.75	8.75
28.25	12.5	24.25	30	2.5	12.5	34.5	23.25	9.5	26.75	6.25	40.5	3	20	5.5	5.25
26.5	13	25	21.25	1.25	10	31.5	17	7	27.5	6.5	41.75	3.25	18	5	4.75
40.75	15	24.75	22.75	1	12.75	33.25	13	10	24.75	10.75	50.5	2.25	22.5	6.5	5
30.25	10.25	23	22	1.5	12.5	32.25	21.75	15.25	23	8	37.25	2	18.75	5.5	4.5
26.25	7.25	15.75	22.75	1.5	10.25	18.5	14.5	6.75	24	5.5	38.25	2.5	11.25	6.25	3.75
21.25	5.25	12.5	16.25	1.5	6	14.25	15.5	12.75	15	6.75	20	4.5	5.75	11.25	8
20	2.25	2	8	0	1	11.75	3.5	5	20.75	2.5	23	0.5	9.75	2.5	5
14.25	1.25	9	11.5	0.75	2.5	11.5	5.75	14.75	27.75	5	26.25	1.75	10	6.75	7.25
18.5	2	10.75	7	0.5	0.75	10.25	2.25	28.25	32	5.75	34.5	1.25	13	4.5	8
19.75	7.75	13	10	1.5	2.25	8.5	8	48.75	27.5	9.75	37	2.25	12.25	4.75	7.5
20	6	16.5	12.75	2.75	3.75	13.25	3	12.25	20.75	4	16.75	1	20	4.25	4.5
17.75	5.25	7.5	10.5	1.75	3	11	6.25	7.5	24.75	3.5	22.75	2	14.25	1.75	7.5
13.25	4.5	7.25	6.75	0.5	3.25	9.25	4	21.5	19.5	6.25	17	1	14.5	2	4.25
14.5	2.75	6.75	7.5	1.5	2.5	15.25	5	26	24	7	20.25	0.75	17.5	5	7.25
17	19.75	11	15.5	4	8.25	10.5	9.25	52	26	10	24.75	3	16.75	4.25	8.75
27	18.25	15.75	16.5	3.25	7.25	14.25	7.5	33.5	30	7.75	29.5	2	15.5	2.75	7.75
18.25	7.75	12.5	13	1.5	5.25	8	4.75	36.75	33.25	5.5	34.75	1.75	18.75	8.75	11.75
13.75	7.75	15	14.75	1.5	5.75	13.5	4.5	16.5	24	6.25	24.75	1.25	14.5	3	3.5
32.5	11.5	15.5	10	2	5	11	9	70.25	31.5	7.75	38	1.75	16.25	2.75	12.5
27.25	12.25	17.75	13.25	2.5	4.75	12.75	12	44.25	27.75	10.75	42.75	3.75	13.5	2.75	9.25
22.75	9.75	9.25	14	4.75	7.75	8.5	7.5	24.25	22.25	7	31.75	2.5	14	3.5	5.75
16.5	10.25	13.5	17.5	2.25	5	9	8	46.5	27.25	11.5	32.5	2.25	18	3	9.5
17.5	8.5	20.5	12.75	2.5	6	7.75	3	57.75	22.5	12.25	34	3.25	15	3.25	7.75
22	2.5	11.25	7.5	0.25	3	10.75	4	14.75	13.75	2.75	25.75	2	9.5	2.5	7.5
40	6.25	18.5	7.5	4.75	4.75	14.75	6.5	26	26.5	10	39.75	3.25	26.75	4.5	11
66.5	6.25	27.75	15	1.25	4.75	14	7	33.75	28.25	16.5	78	5.75	40	7.25	15
52	7.25	19.75	22	0.5	5	20	9.75	35.75	36.25	14.5	59	5.75	33.5	9	13.75
26.25	7.25	25.25	16.25	2.75	3.5	29.75	5.25	17	26	8.25	39.5	3.5	17.5	4.75	10
15.75	3	6	13.5	1.5	1	25	3.5	15	36	4.5	26	1.5	11	3	4.5
15.75	2	3.5	11.75	0.75	2	11.5	2.75	13.5	22.75	2.25	24.25	2	17.75	1.25	9.75
15	5.5	5.25	12.25	2	5.5	7	7.5	27.25	27	3.25	22	3.25	18.25	4.75	7
24.25	2	13.25	10.5	0.5	2.25	13.5	5.75	34.25	31.5	5.75	23.5	2.75	23.25	3.75	9
27.25	9	12.75	17	1	4.25	16.5	10.5	44	28.25	6.25	28.75	1	29.75	4.25	8
14.5	7	6.75	12.25	5	2.75	11	8	34	26.5	3.5	27.75	1	15.25	3.25	5.5
17	10	15.75	10	2.75	2.75	9.5	6.5	44.25	31.25	4.5	31	1.25	18.75	2.75	8.25
16.75	9	9.5	14.25	0.75	4.5	13.5	6.75	16.5	26.5	6.5	21.25	1.75	21.5	3.25	3.75
21	8.5	21.75	15	1.5	4	9.5	6.5	48.5	23.75	14.75	28.75	2.75	13.75	4	8.5
11.25	12.25	7.75	15	3.75	10	11.75	7	35.5	17	5.5	21.25	1	11.25	2	4.5
24	11.5	17.75	17.5	2	10.5	6.75	7.5	31.75	29.5	11	40.5	3.5	19.25	3.75	11
23.75	6.25	17.75	12.25	2	4	9.25	4.25	51.25	27	8	40	3.75	17.25	4.25	9.25
13.25	10.75	6	9.25	1.75	4.75	10.25	4.75	25.25	15.5	2.75	18.5	0.75	7	4.25	4.75
19.25	3.5	5.75	12	4	3	10	5.25	31.75	21.5	5.25	26.25	1.25	9.75	5.5	9.75
12.75	6.25	7.5	9.5	2	6.5	6.5	4.75	28.75	25.25	5.75	21.75	0.75	14.25	1.75	3.25
23.25	10.75	13.75	16	1.25	5.75	6.25	7	33.25	29	7	36	0.75	22.75	3.75	8
22.5	9.25	13.75	11.5	1.25	4	12.5	6	18.25	29	5.5	36.25	0.75	13.75	3.5	5.25
29.25	5.5	19	16.25	3.75	2.5	9.5	5.75	48.5	25	9.5	40.5	1	23.5	2.75	9.75
23.5	6.5	14.5	11.5	3.5	2	9	7.5	49	33.75	8	42.5	5.25	23.75	2.5	15.25
20.75	6.25	13.75	9.5	0.25	7.5	8.75	4.25	33.25	32.25	3.5	35.75	1	18.75	3.5	6.75
15.25	6.25	10.5	12.25	5	3	10.75	10	28.5	20.75	10	18.25	2.5	13.75	2.5	7
32	9.75	16.25	9.25	3.5	5.25	10	2.75	44.25	23.5	10.5	37.5	2.75	16	2.5	9.75
10.5	5.25	9.25	10.5	2.25	2.75	9.25	2.5	16	21.25	4.25	31.5	1.25	11.75	3.25	6.75
13.75	11.5	7	9.75	4	5.5	6.25	3.5	44.25	19	5.25	23	1.25	13.5	1.25	5
22	10.25	7.75	12	3	5.75	8.75	4	36	14.25	3.25	31.25	1.75	16.75	3.25	7
30.75	7.5	8.25	9.5	3.25	3.75	10	5	47.75	30.25	3.5	30.75	1.5	21	2	11
14.75	6.25	8.5	11	0.5	5.5	8.5	6.75	26.5	24.5	5.25	21.5	1	10.25	2.75	6
22.25	5.25	11.75	11.25	1.75	2	9	2.75	38.75	21.75	5.75	30.75	1.25	14.5	5.5	10.25
16	7.75	13.25	10.75	2.25	5.5	8.75	4.25	38.5	21.5	4.25	23.25	1	10.75	1.75	9.75
21	13.25	7	15.25	3	5.75	8.75	7.75	34.25	29.5	6.25	36.75	1.5	21.75	2	6.75
29.75	9.75	15.25	11.75	2.75	4	11.75	6.25	34.25	29.25	7	47.5	0.75	21.5	3.25	7.5
16.75	3	6.5	12	0.5	1.75	8.25	4.5	37.5	22.25	5.5	33.5	0.5	18.25	5	5
19.75	7.25	16.5	12.5	1.5	3.75	11.75	7	13.5	26	4.5	34.75	1.5	17.25	1.75	3.5
26	12.5	12.25	13.75	1.75	3.75	11.75	5.25	41.75	21.25	7.75	46.75	2.5	17.5	3	10
22.5	5.5	15.25	15	2	3.5	15.25	8.5	43.5	25.75	8.75	33.25	2.75	22.5	1.75	11
14.25	4.5	8.75	16	0.75	4.25	11.25	6.5	16.75	19.75	2.25	32.5	0.25	15.75	1.25	4.5
15	6.25	20	24	1	5.25	14	11.75	13.5	22	6	26.5	2.25	19	4	4.25
23.5	6.25	44.5	23.25	2.5	3	16	7.75	55.25	29.25	4	59.25	1	28.75	2.75	13.75
16.75	6	20.75	21.5	1.25	4.25	11.25	10.25	21	16.25	2.75	20.25	1.25	16	3.25	10.75
13.75	7.75	13.25	22.75	4	5.25	17	12.75	13	24	3	22.5	0.75	7.25	4.5	3.5
29.5	8	30.75	16.75	2.5	5.25	22.75	11.75	48.25	27.75	9	54.5	2	31.25	2.5	11
32	10.5	23.75	26.5	3.5	4.25	20.75	9.75	34.25	37.5	9.25	79.25	1.5	43.75	4.75	13.5
34.25	18.75	22	28.75	1	13	38.5	22.5	14.75	28.75	13	43.5	3.25	23.75	6	7.25
23.25	10.75	13	26.25	1.5	8	20.25	23.25	10	26.25	6	35.25	2.25	13.25	4.25	3.5
42	19	35.75	32	0.75	16.75	39	28	24	38.5	21	62.75	3.5	22.75	16.5	14
31.75	17.5	29.5	26.25	3	9.5	23.75	19.25	27.75	29	19.25	36.25	3.5	21.5	6.5	10
34.25	17.5	29.25	26.5	1.5	10	23	26.25	33.25	27.25	23.75	40.75	2.5	16.75	5	10.5
42.5	26	28	31.75	1.5	19.25	34.5	37.75	22.25	25.5	20.25	48	3	26	5.75	9.5
42.5	16.25	18.5	34.5	2.25	17.25	32.75	31.5	21.5	28.75	14.75	46.25	2.25	21.75	7.25	12
35	11.75	18.75	25.25	2	8	24.75	21	20	21	6.75	29.75	1.75	17.25	7	4.5
30.75	15	23.5	24.25	1.25	13.75	30.25	27.75	10.5	28.25	12.75	44.75	4.75	20.75	6.5	5.75
38.25	16.25	19.75	32.25	1.75	10.75	25.5	23	19.25	24.25	13.25	34.5	3.25	13.75	6	4
44.25	17	39	28.5	0.25	25.25	22.75	22.25	41.25	30.5	18	48.25	6.5	25.25	8.5	10.5
38.25	24	28.75	37.75	2.5	14.25	24	21	35.25	27.75	16.75	49	4	31.25	8	12
26.25	22	23	28	2	10.25	21	20	31.75	33.5	13.25	39	3.25	23	4	9.25
26.25	5.75	15	21.5	0.75	6.25	12.5	15.25	13.25	24.25	4.75	27.5	0.75	11.75	4	11
25	2.75	12.25	7.25	1.5	1.75	23.75	8	15	22	6.5	29.75	2.5	8.5	5.75	6.5
17.5	1.75	5.75	4.5	0.75	0.5	14	2.5	11.5	21	2.75	27.75	0.75	10.5	3	6.25
28.5	4.25	9.5	9	0.75	1.5	10.5	4	30.25	24.5	4.25	43.75	1.25	16.5	7.75	10
17.5	5.25	17.75	11.25	3.75	4	9	5.5	35	21.25	7.5	25.25	2.5	13.75	4	5.5
16.25	5.75	14	7.25	1.75	2.5	14.5	8.75	46.75	32.25	5	38.75	1.5	20.75	3.5	20
14	8.75	9.25	9.75	2.25	4.25	8	10.25	29.25	24.5	2.75	25.5	1.25	14	1.5	9.75
26.25	13.5	22	18.5	7	9.5	13.25	13.75	28.5	27.5	8	25.5	0.75	11.75	6	9.75
15	11	15.5	14.5	1.75	7.75	9	9.25	34.5	27.25	8	21	1.25	13	3.25	7.75
15	3.5	15.25	11.75	0.25	1.5	9	7.5	27.25	25.25	3.25	29	1	8	3	7.5
11	6.5	9	9	2.5	2.5	11.75	5	14.5	15.75	4.5	17.25	1.25	9.25	2.5	6.25
16.25	13	14.25	11.75	2.5	4.25	9.75	4.5	40.75	22	10	21	2.5	12	2.75	12.25
15	13.75	6.25	13.25	1.5	7	9.75	10.25	32.25	33	5.5	34	1.25	14	5	12
21.25	2	6.75	12.25	2.25	5	11.75	3.5	49.75	28.75	4.25	40.5	2.5	17.25	5	15.5
21.5	6	15	8.75	0.5	3.5	12.75	5.5	33.75	37.25	3.75	30.75	0.25	16	2	10.75
20	2.5	6.25	6.5	0.5	3.5	14.75	4.25	8.75	19.75	3.75	22.25	1	17.5	2.5	6
21.5	1.5	7.25	4.75	0.75	1.25	17.5	8.25	24.5	21.5	5	20.5	1	8.5	2.5	5.5
31	6	19.25	7.25	1.5	2.5	15.25	4.5	49.5	25.25	5.5	43.25	2	14.25	5.25	9.5
19.75	8	9.5	11.5	2	4	14.25	6.25	19	21.75	3.25	20.75	0.75	11.5	3.75	3.75
16.25	15.75	7.5	11.25	1.5	6	8	7.25	42.5	20.5	6.75	18.5	2.5	7.75	7	5.25
17.75	16.5	10	15.5	2.25	10	8.5	10	55.75	28.5	10.25	27.75	2.5	13	5	10.25
23.25	11.25	18	10.75	1.75	4.5	12.5	5.5	58.25	36.75	6.5	45	1	26.5	2.75	12.25
23.25	12	10.25	16	1.25	5.25	14	8	49.25	19	4.5	25	2	15.75	3.25	9.25
18.5	13.25	12.5	13.25	1.75	5.75	13	8.25	38.5	28	6.5	22.25	2	7.75	2.75	11
20.75	9.5	6.25	16.25	0.25	4.5	8.25	4	33.25	23.25	3.75	43.75	0.5	12.5	1.75	10
18.5	3.75	17.75	8.5	4.25	2.75	16	3.5	41.25	27.25	6	34	2.5	30.75	2	6.75
11.25	4.5	7.25	6.5	1.25	2	10.75	5.5	40	13.25	8	18.75	1.5	6.75	4.25	6.5
17.75	3.5	6.25	8	2.25	1.5	14	2.25	18.25	19.5	3	15.75	1.5	8.75	0.5	6.25
16	3	6.75	12.5	2.25	3.5	12.25	5.25	29	16	3.75	24.75	0.75	24.25	3	4.5
24.5	9.5	8.5	11.5	1	5	9.25	6.5	38.75	30.25	3.75	25.75	1.5	17.75	2.75	8
16	9.75	15	11.25	1.75	4.5	7.5	5	60.25	30.75	6.25	33.5	2	22.5	1	8.5
27.75	18.5	11.25	10.75	1.75	7	8.5	9.75	43	21.5	3.25	34.25	2.5	15.75	5.75	10
28	10.5	18.75	20.75	2	8.25	9.5	6.75	40.5	25.25	9	39.75	1.25	22.25	4	12.25
13.25	14	8.75	13.5	1	6.75	7.5	9.25	40	22.25	6.25	27.25	2.5	10	3.5	5.5
21	7	10.5	13.75	2.75	4.25	9	4.5	22.5	21	4.25	34.75	1.75	11.5	1.5	6.5
14.75	7.25	9.75	7.25	2	6.5	9	6.25	40.25	18.5	5.25	19.25	0.75	11.25	2.5	10.5
16.5	7.25	7	13	2.75	5.75	8.75	5.5	24.25	35.75	2	28.25	1.5	14.5	3.75	6.5
20.75	7.25	5	9	3.75	4.25	6.75	3.75	36	18.5	5	34	1	18.5	5.25	5.25
24	5	18.5	11	1.25	4.5	13.25	6	49.5	23.25	8.5	32.5	1.75	11.25	1.75	11
17.75	7.5	9.25	11.25	3	5.5	10.5	5.75	30.25	33.5	6	47.75	0.75	16.75	4	8.25
25.75	5.5	20.75	11.75	3.25	2.75	7.75	5.75	46.75	26.5	10.75	43	3.75	22.75	4.5	12.25
13.25	5.25	10.5	14.25	1.25	4	10.5	3.75	23	20.25	2.25	28.75	0.75	19.25	2.5	3.75
23.5	8.75	13.75	10	3.5	3.5	8.5	7	43.5	16.75	5.25	35.75	1.75	19.25	1.25	14.25
8.25	5.75	4.75	17	2	4.25	6	4.25	34.5	15.25	2.25	21.25	0.5	6.5	1.75	7.5
25.5	10	11.75	9.75	2.5	7.25	9	8	36	23	7.5	23.75	2.25	16	4.5	9.75
10.25	8.25	11.5	9.75	2	4.25	3.5	5.75	38.25	16.25	6	16.25	2.25	8.75	2	4.5
23	7.5	8.25	9.25	1.5	5.5	5.25	4.25	43.75	23.25	5.25	22.75	1.25	10.5	2.75	9.5
22	5	9.5	10	0.25	1.25	6.75	3.75	35	21.5	4.75	22.25	0.5	15	0.75	7.25
23	5.25	21.25	8.75	2.25	1.75	7.5	4	53	21.75	10.25	31.5	2	16.75	1.5	8.5
22.25	17.25	8.5	16.25	2.25	10.25	9.75	7.25	27.25	17.75	4.75	25.75	0.75	14.5	2.5	8.25
20.25	4.25	6.5	7.75	1	1.5	6.5	4.5	47.75	27	4.5	38.5	0.75	15.75	3.25	12
20	12.5	12.5	10.5	1.75	6.5	6.5	7	29.5	20.75	5	28.5	1.25	16.5	2	9
22.5	12.25	10.75	11.5	1.5	4.75	5.75	5.75	31	23	3.5	41.5	1	17.75	2.25	10
25.25	11	17.5	11	1.5	6	9.5	7.25	25.25	35.75	8.75	43	2.25	26.75	2.75	9.25
22.25	8.5	18.75	13.5	2.75	4.25	10.5	6.5	53.25	26	10.25	42	2	19	3.5	17.25
14.5	4.75	9	20	1.25	3.25	10.25	9	25.25	21.25	3	43.5	2.25	22.75	3.75	6.25
26	3.5	12	8	2.25	3.5	8.25	2.75	19.5	27.5	6	31.75	0.75	17.25	1.75	8.5
39.25	4	21.5	6	1.25	3.25	13.25	6.25	18.75	32.25	9.5	40	2	13.75	6.5	6.75
20	4	3.5	5.5	0.75	2.25	7.75	2.5	17.25	21	2	20	1.25	11.25	1.5	6.75
19.25	5.75	4.75	8.25	2.25	5.25	9.75	1	37.75	19	6.25	26.75	1	12.5	3.5	6.75
20	9.75	5.5	9.75	3.25	9.25	10.75	5.25	27.5	18.5	9.75	20.5	4.25	12.75	5.5	4.25
19.75	5.5	20.25	12	1.5	3.75	8.75	5.5	58.5	27.25	5.25	33.75	1.75	19	3	9.5
16	11.25	16.5	8.75	3	4	6	6.5	42.5	17	7.25	26	2	14.25	2.75	8
20.75	13.5	15.25	14.75	2.75	7.25	7.75	6.75	24	20.5	5.5	22.75	1	10	1.25	7.75
18.25	8	13.5	14	3.25	5.5	8	7.5	36.5	28.25	5.75	34.5	1.5	21.5	2	11.75
22.25	4.5	8	7	0.75	1.75	5.25	1	37.5	27.5	5.25	35.5	0.5	11.25	2	6.75
18	10.25	10.75	8.75	3.5	2.25	7.25	4	60	19	6.75	25	2.75	15	2.75	7
20.75	9.5	12.25	9.25	1	3.5	6.5	5.25	41.5	23.5	4.25	25.25	1	11.75	1.75	7.25
17.25	5.75	13.25	8.75	1.75	4.75	14	2.75	22.5	18	4.25	36.75	0.25	17.75	3.5	5.25
22.5	5.75	7.5	9	2.5	3.75	8.25	5.75	45.5	25	5	37.75	1.25	25.75	5	7.75
21.5	11.25	14	9.25	3.25	4.5	7.75	7.5	50	17.25	11.25	25.5	3.25	15.5	1.75	8.75
30.25	12.5	16	14.75	5	7	6.25	8	23.75	22.75	9.5	42.5	1.25	17.5	4	7.5
27.5	10.25	10.75	10.75	2.5	4	7	4	28.75	36.5	7	47.25	0.75	23	4	11.5
12	6.25	12.5	10	1.5	3.25	4	3.25	44.75	22.25	7.25	27.25	0	10.5	0.75	7
14.75	11.25	14	9.75	1.75	3.25	8.5	5.5	38.75	15.5	4.25	22.25	1.75	13.75	2	4.5
14	8.5	7.25	10.25	0.75	6	6	5.5	25	14.5	3	24.5	0.75	9	2.25	7.75
15.75	10	8.25	11	1.5	3.75	9	4.75	30.25	22.5	5.75	28.75	0.25	13	2	10
18.25	7.5	11.25	13	1.25	4.25	7.25	6.25	27.75	25.75	3.75	21.75	1.25	18.5	2.5	5.75
19.75	8.25	11	13	2.25	3	7.25	5.25	54.75	26.75	5.25	32.75	1.25	18	3.75	10.75
24	9	18.25	13	4	3.25	8.25	6.5	34.75	17.75	6	21.5	1.5	20.25	2.5	7.75
21.25	9.5	14	13.25	3	6.25	9	9.75	48.75	22.25	7.5	34.5	2	13.5	4.5	11.5
24.25	10.25	18.5	14.5	2.5	7.25	8.75	5.75	42	37.25	10	36.5	0.75	17.75	2.5	11.25
20.5	6.75	11	17.75	3.75	8.25	15.25	7.5	17.5	22.75	4.25	35.75	1.75	21.25	3.5	8.25
25	6.5	17	10.5	2.25	1.75	13.5	9.25	52.75	24	8.75	48.25	1.5	15.25	2.75	11.5
24.25	8.5	17.5	22	0.75	4.5	14.5	12.5	43.25	34.75	7.5	42	2	21	4.25	11.75
19	12.25	16.5	26.5	1.5	8	18	11	18.75	20.25	5.25	29.25	2.25	13.75	2.5	5.75
18.75	4	17	26.75	0.25	6.25	12.75	10	18.25	27	6.25	41.5	1.5	26.25	3.5	4.5
19	6.25	32.5	17.5	0.25	2.25	14.75	6	41.75	18.5	7.5	37.75	3	14.75	2.5	13.25
34	5.5	27	22	0.25	5.25	20.25	9	15.75	22.5	8	65	2	23.25	9.75	13
32	9.25	22.5	19.25	1	4.75	16.25	19.75	11.75	21	5	61	0.75	20	3.5	13.25
16.5	13.75	19.25	19.75	1	4.75	18.5	12	8.75	15	3	32.25	1	25.5	2.75	3.75
7.25	7.25	15.25	21.5	1.25	4	19.75	9.5	8.5	16.75	2	19.75	0.5	11.25	2.25	3.75
29.25	9.25	15.75	26.75	1	7.25	24.75	12.75	17	23.5	11.5	39.5	3	24	4.75	5.75
23.5	10.75	16.5	25.75	0.5	8.75	25.5	9.25	33.5	27.5	14	38.25	2.5	15.25	4.25	10.25
40.25	9	30	32.75	4	8.75	28	21	48	34.5	20.5	79.75	4.75	29.75	7.25	18
21	7.5	17.75	23.75	1.25	5.25	14.5	12.75	36	23.5	8	36.75	1.25	16.75	5.75	7.75
28.5	14.5	16	25.25	1.5	7.5	19.75	11	48.25	20.75	23.75	37.25	5.5	19.75	6	9.75
30.25	5.75	14.75	6	0	2.25	16	12	12.75	25.75	5	23.5	2.75	14.25	4.5	7.75
15.25	2.5	5.25	3.5	0.75	0	12	7	8.75	23.75	3	21.5	0.5	10	1.5	4
23.25	2	5.75	4.75	0.5	0.5	6.5	1	9.25	25.75	3.25	29.75	1	11.25	6.5	8.5
21.25	6.25	7.75	6	1	2.25	8	4	33.75	27.75	5.5	19.25	2.25	19.5	5	8.5
18.5	3.75	7.5	10	0.25	2.25	12.25	5	18.25	26.75	8.5	23	2.25	17	4.5	7.75
27.25	10.25	8.75	13	1.25	2.25	7.75	9.25	49.25	27.5	4.5	36	1.5	15.25	1.75	10.25
11.25	15.5	15.25	8	1.75	4.25	11	9.25	59	19.25	6	18.75	3	10.25	3.25	13.5
16.75	14.25	12.25	19.25	2.25	10.5	10	12.5	17.75	30	10.75	30.5	2.5	18.25	6	7.75
13.25	8.25	2	9.25	0.75	3.75	9.75	7	38.75	18.25	4	21.5	0.5	12.25	7	7.25
28	15.25	9	13.75	2.75	3	6.25	11.25	34.5	18.75	3.25	24.75	2.25	19.25	3	7
22.25	7	12.75	18.25	1.25	4.25	11.75	9	39.25	26.75	3	40.5	1.5	19.5	2.75	10.5
18.5	10.25	15	8	2.25	5.75	10.25	7.75	54.5	24.25	9.75	34	2.25	18	3.75	7.25
23	8.75	19	16.5	1.25	4	10.25	6.5	28.75	26.25	8.25	37.5	0.25	19	3	9.75
26.25	9	18.25	9.25	2.25	2	5.5	7.25	44.5	24.75	7.75	37	2.25	15	2	9.75
18	3.5	10.25	6	0.75	1.75	7.25	2.75	24.75	20.75	2.5	20.25	0.5	10.5	2	5.25
18.25	1.5	5.25	4.25	0.75	2	10.75	1.25	29.25	17.75	1.75	23	0.5	11.5	2.25	7.25
21.25	0.75	9.75	6.25	1.25	3.5	9.5	4	13.25	11.25	4.25	15.75	0.75	5.5	2	4.25
13	1.5	5	5.25	1	2.25	12	1.5	12.25	15.75	2.5	16.75	0.5	7.5	2.5	2.75
9.75	1	1.75	8.25	0.25	1.5	12	3.5	18.25	14.75	2.75	17	1	6.75	2.5	3
12.5	5	4.25	9.25	1.75	2.5	14.5	4.25	13.5	18.5	5.25	17.75	1.25	17.5	4.25	2.5
17.25	10.25	11	16.5	1.5	8.25	14	10.25	51	20.75	13	22.5	5	9	2.75	9.5
22.25	5.75	5.5	10.25	1.75	8.5	14.5	5.5	37.5	18.5	4.25	34.5	2.5	16.5	7	5.5
19	6.75	7.25	12.75	1.25	5.75	11.75	6.25	28.75	19	3.5	30.75	1.5	24	4	6.25
20	5.25	13	10	0.25	5.25	9.75	4	11.75	20	4.5	25.5	1	10	1.75	6.5
21.5	2.5	5.25	6.75	1.5	4.5	14	5	12.25	17.25	3.5	26.75	0.75	7	2.25	6.25
19	1.25	2	5.75	0.5	1.25	13.25	5.75	6.75	19.5	2.75	21.25	1	11.75	2	4.25
25.25	7.5	2.75	10.5	0.25	2.5	14.25	4.5	50.5	35.5	3.25	21.75	0.75	16.75	3	9
24.75	15.75	15.5	18.75	1.75	8.5	11.25	8.5	36.5	20.25	6	22	1.5	11.25	4	7.5
22.75	6.5	7	14.75	2.25	6.75	10.5	6.25	28	18	3	31.75	1.75	18.75	1.5	6.25
18.75	7.25	19.75	15.5	2	3.5	7.25	11.75	40.5	27.75	8	36	1.5	18.5	4	11
18	18	18	17.5	4.5	10.75	10.5	8.75	26.25	24.75	10	29.25	3	12.75	5.5	5.5
16.5	10.75	10.25	9	2.75	6.75	12.5	5.5	27.25	17.75	6.5	26.5	1.25	17.25	2.75	8.25
15.75	8	9.5	14.5	3.25	4.75	10.5	3	27.5	17.25	3.75	23.75	1.25	9.5	4	8.75
18.5	7	6.75	8.75	1.25	5	6.5	8.25	40	23.75	7	28	2.75	15.75	6	7.75
28.5	8.75	15.5	15.5	1.5	5.25	7.75	8.5	37.25	23	7	28.25	1.5	17.25	0	7
15.75	9	15.75	11.75	2.25	7.75	11.25	9.75	36.25	14.25	7	18.5	2.5	9.25	2.75	10.5
31.25	9.25	8.75	11.75	1.75	6	8.75	8.75	38	20	6.5	41.5	2	24.25	4	12.25
19.25	8.75	13.25	14.75	2.5	4	9.5	5	35.25	32.75	10	39.75	1.5	25.5	3.25	10
15.75	8	9.25	11.75	2.25	8.25	12.5	5.25	20.75	20.75	5	33.5	1	11.5	3.75	6.75
10.75	5.25	5.25	7.25	1.5	2	10	3	35.25	16.5	2.75	20.5	0.25	18.25	2	6.25
14.75	6.5	8.75	11.25	1.25	4.75	11.25	4.25	23.75	17.25	3	22.5	1	9.75	4	7.25
14.5	12.5	13.25	12.25	2	6	8	5.5	43.25	11.75	8	20.75	3.25	11	3.5	8
19.75	9.75	11.5	15.5	2	4.25	8	5.25	30.25	26.25	6.75	27.5	0.75	21	3	6.75
26.75	5.5	16.5	13.25	2.75	4.25	12	2.75	52.5	28.25	8.25	40.25	2.5	21.25	2.75	10.75
17.5	7.25	14.25	8.5	0.75	3.5	10	4.75	20	25	2.25	36.5	0.5	16.25	2.25	8
21.5	14.25	8.25	14.5	3.25	6.25	10.75	8	21	20	5	29.75	2	11	3	7
24	11.5	13.25	15.25	2.5	4.75	9.75	6.25	40	22.25	5.25	39	2	17.5	3	6.75
18.75	9.25	14.75	11.5	1.5	5.25	10.75	8.25	55.25	24.25	11.25	42.5	1.25	21.5	4	12.5
25	4.5	11.25	10.5	1.25	4.25	6.75	4	26	23.5	6.75	37.25	1.75	13.75	4.25	7.75
22	1.5	6.5	4.75	1.25	1.5	10.5	1.75	4	16	2.25	14	0.75	7.5	1.25	3.75
12.75	4.25	3.5	5.5	1.75	2	10.25	2	21.25	17.25	1.5	15	0.5	16	1.5	4
12.5	7.25	13	6.5	2	4	10.5	2.25	17.75	18.5	4.25	17.5	2	8.25	2.25	5.5
15	7.5	7.75	12	2.75	4.5	9.75	2.5	30.25	18.75	4	22.75	1.75	8.5	4.5	7
22.75	8.75	11.5	10	1	3.75	12.25	5.25	31.5	22.75	5	22	0.5	15.25	2	5.75
20.25	10.75	18.25	13	2	3.5	6.5	6	49.5	18.5	5	25	1.75	18.75	4.75	8
10.75	7	7.75	11.75	1	4.25	10.5	4.75	33.25	17.25	3	15.75	2.25	8.5	3.25	3.75
15.75	6.75	7.5	13.5	1.5	5	10	4.25	40.5	25.5	2.5	25.25	1	9	4.75	9.5
23.5	14	10	11.75	2.25	8.25	10	8.25	29.5	16.75	4	20.5	1.25	15	1.75	9.25
23.5	11	16.25	12.25	0.5	5	10.75	5	44	24.25	7.25	38.25	1.75	21	2.75	9.25
17.25	10.25	12.25	13.5	2	7.25	9.75	7	26.25	26.5	9.5	35.75	1.25	18.5	2.75	7
[truncated: 41,201 more rows]
