# Supplementary material for: Global sleep homeostasis reflects temporally and spatially integrated local cortical neuronal activity
Source: eLife. 2020 Jul 2;9:e54148. doi: 10.7554/eLife.54148 (PMC7332296; doi:10.7554/eLife.54148)
Supplement: Figure 1—source data 1. [file elife-54148-fig1-data1.zip › Figure 1/Firing Rates/Firing-Rate-Mouse-3.csv]

LFP 1	LFP 2	LFP 3	LFP 4	LFP 5	LFP 6	LFP 7	LFP 8	LFP 9	LFP 10	LFP 11	LFP 12
6.75	3.25	2.25	0.5	1.25	38.5	23	11.25	24	30.5	8.25	2.5
14.5	4.5	1.75	3.25	2	38.25	25	17.75	19	27.25	9.25	1
8.25	3.5	3.25	2.25	1.25	42	27.25	18.25	18.5	19.25	8.5	0.25
6.5	5.5	3.25	2.25	0.75	43.75	22.5	15.5	18.5	23	5.75	1.25
4.75	4.5	0.25	1.25	0.5	29	24.25	21	11.25	24.75	7	1.75
16	4	2.5	3.5	1.25	24.75	22.25	18.5	12.75	20.25	10.5	0.5
7.5	6	1.5	1.5	0.25	38.75	19.25	19	15.25	28.75	8.75	0.75
9.25	2.5	1.75	1.75	0.75	29.25	19.5	13.5	9	17.75	4.75	1.5
11.75	2.75	2.75	2.75	1	28	19.5	15.5	11.5	22.25	7.25	0.5
3.25	2.5	0.75	1.5	0.5	25.75	19.25	13.25	6.75	14	5.25	0.25
38	5.5	8.25	6.75	4.25	36.5	32.25	20.25	20.5	18	20.25	0.75
4.5	7.75	4.25	3.5	1.75	71.5	27	29	12.25	39	8	2.5
2.75	6	1.25	2	0.25	60.25	31	38.25	15.25	30	7.5	2.25
4.75	4.25	6.25	2	0.25	42.5	11.25	11	10.75	23	2.5	1
2	4.5	1	1.75	0	52.25	22.75	32.25	22.5	29.75	9	0.75
13	6	4.75	6.25	2	60.75	28.5	24	14.75	39	9.25	1.75
2	5.5	2.75	2.25	0.5	49.5	26.75	13.5	28	35	6.25	2.75
1.75	5.25	2.75	2.5	0.25	30.75	18	37.25	23.75	40.5	6	1.5
2	4.75	1.75	3	1	27.5	17.25	40.75	20.25	33.5	6.25	1.25
6.5	5.5	3.25	6	1.75	45.25	29.5	23	24.25	47.75	6.25	2
9.75	4.5	3	1.5	1	39.5	17.5	26.25	12.75	29.75	6.75	1.25
4	2	0.75	1.25	0.75	31.5	19.25	21.75	7	18.25	3.5	2
4.25	2.25	2.25	1.25	0.25	26.5	18.25	27.5	7.25	19	6.25	1
5	3	1.5	2.25	0.75	13.25	18.75	30.75	8.5	29	3	0
6.5	2.5	1.5	1.25	0.5	17	23	19.25	11.75	32	5	0.75
3	1.5	1.75	0.75	0.25	29	15.75	11.75	9.25	22.5	5.75	0.75
2.75	3	0.25	1	0.25	32.25	24	19	12.5	20	5.25	1
3.25	3.5	1.25	1.25	0.75	22.25	15	12	14.75	21.25	3.75	0.5
4.75	4.25	1	2.5	0.25	39.5	20	18.5	15.25	34.75	7.75	2.75
5	3.75	0.5	2.5	0.75	31.25	15.5	18.5	6.75	31.25	7.75	1.5
6.75	4.75	1	1	0.5	25.25	14	16.25	4.75	19	5	1.25
4	3.75	2	1.25	0.5	30.75	24.25	17.5	9.5	26.75	4.75	0.75
7	3	1.5	1.5	0.75	20.75	17.75	28	13	20.75	5.25	0.5
6.5	4.75	1.75	3.25	0.5	35.25	17.25	16.75	11.25	36.5	5.75	1.25
8	2.75	1.25	1.5	0.25	30	15.5	21	7.25	16	4	1
4.25	4	1.75	1	0.5	43.75	19.5	19.5	11.5	27.5	8.25	1
7.25	3.5	1.5	1	0.5	28.75	18.5	12.25	8.75	27.5	5.25	0.75
4.75	2.75	1.75	0.5	0.75	27	24.5	19	11.5	16.5	2.75	0.5
3.75	2.5	1.25	2.25	0.75	31.5	20.25	12.75	6.75	29	4.25	1.5
5	4.25	2.75	4.25	0.5	43	25	14	8.25	29	5.5	0.5
4.25	4.75	2.25	1.25	1.25	28.5	21	13	7	30	2.75	1.25
5.75	2.75	1.25	2.25	0	30	22	18	7	26.75	5.75	1
4	3	2	1.5	0.25	40.25	30.75	9.75	6.5	27	8	0.5
3	4.5	2.25	1.25	0.5	68.25	35.25	34.5	16.75	39.75	8	2
4.25	3.75	1.75	1.5	0.5	39.25	28.5	22.75	10.5	40.25	10.5	0.75
1	2.75	1.25	1.5	0	17.25	30.75	8	11.75	14	4	0.25
0.5	2.25	3.25	1.25	1	21.75	24.75	12.75	13.25	13.75	2.25	0.75
1.75	3.75	5.5	3.5	1.25	25	41.25	26.75	12.5	12.25	5	0.25
2.5	2.75	7	3.25	0.25	25	36.75	19	20	16.25	6.25	0.5
2.5	1.5	2.25	1.25	0.25	20.75	22	17.25	12	22.75	4.25	0.25
0.25	1	2.25	1.75	0	23.25	15.75	5.25	11.5	20	5.5	0.75
0	1	0	0.5	0.25	23.75	28.75	16.25	11.25	14.25	8	0.5
2.25	2	4.5	1.25	1.5	23.5	24.25	13.75	6.75	18.5	7.75	1.25
4.25	1.5	0.75	2	0.25	24	16	9	7.75	36.25	8.25	0.25
0.5	1.75	1.75	0.75	0	22.25	9.75	14	10.25	9.75	2	0.75
0.5	1.5	2.5	2	0.25	25.75	20	10.75	10.25	20.25	8.75	0.5
0.5	1	2.25	1.25	0.25	21.75	29.75	9.25	20	18.75	5.25	0.25
1	2.25	4.5	2.25	0.25	22	31.25	11	17.5	10.5	3.5	0.25
1.5	2	2.25	3	0.25	16.5	39.5	20.75	18	19.5	11.25	1.5
4	2.5	10	2.5	1	23	26.5	16.5	17.25	17.75	1.75	1.25
0.5	1.75	4.5	1.75	0.25	16.75	28.25	9.5	13	12.5	3.5	0
2.25	1.75	5.5	3	0.5	15.25	26.25	11	15.25	15	4.5	1
1	2	3.25	0.5	0	13.25	21.75	7	8.25	11.75	2.25	0.5
0.25	2.5	2.25	1.25	0	15.25	17.5	6.5	9.75	10	9.5	0.25
1	2	4.25	1.5	0.5	20.25	20.25	13.5	8.75	15.5	6.25	0.5
1.5	1	1.75	0.5	0	13.5	12	4	11.25	12.5	3	0.25
1.25	2.75	3.25	2.5	1.5	16	26.5	12.5	19	15.5	3.75	0.75
0.5	2	4.5	2.25	0	14	17.75	18	15.5	13.25	6.25	0.5
0.5	1.25	2	2.5	0	13.5	24.25	5.75	13	13	2	0.5
0.5	1.25	3.75	2	0.25	13.5	20	4.75	5	12	2	1.25
1.25	1.75	4.75	1.5	0.25	12.25	19.75	12.25	21.25	15.5	3.5	0.75
1	2	3.5	2.5	0.5	16	19	21.25	10.75	17	4	1
2.5	3	6.25	3	1	13.5	26.5	8	10.25	13	8.5	1.25
1.5	3.5	5	1.25	0.75	16.25	27	13.25	12.75	20.75	4	1.5
2.75	3.5	6.75	3.25	0.75	15.75	35.75	9.75	12.75	20	3.5	0.75
1.5	1.75	4.25	2	0	18	22.25	11.5	10.75	12.5	3.25	0.5
0.75	1	5	0.25	0	16.5	14.5	10.25	17	7.25	4.25	0.75
0	2	3.25	1.5	0	15.5	20	10.5	12.5	18.75	4	0.25
1.5	1.25	3.75	0.75	0.5	14.25	12	14.5	8	17.75	2.25	0.75
1	0.25	2.5	0.5	0	15.75	16.25	16	5.5	10.5	1.75	0.5
0.75	2.75	2.25	2.5	0.5	19	27.25	9	11.25	18.75	12.25	0.25
1	3	3.25	2	0.5	12	17.5	9.75	15.5	19	2.5	0.25
1.25	2	4	1.5	0	16.75	32.75	12.5	10.75	27.75	5.75	0.75
0.25	2	3.5	0.75	0.25	20.75	13	10.5	10.25	20.75	2.75	1
1	1.5	2.5	0.75	0	14	13.25	7	10.25	13.75	2.75	0
0.5	1.25	2.25	0	0	13.5	17.75	8.25	5.5	10	5.75	0
1	1.75	3	1.5	0.5	18.25	26	4.5	11.25	21.25	3.5	0.75
1.75	2.75	3.25	1.75	0.5	18.5	26.5	8.5	15	19.5	2	1
1.75	1.5	6.75	2	0.25	16	32.25	9.75	10.5	14.25	2.25	0.75
2	2.25	4.75	2	0.75	11.5	12.25	7.75	11.75	7.75	2.75	0.5
1.25	1.75	3.75	1.5	0.25	16	26	10	13.25	14.75	3	0.5
2.25	1.75	5	2.25	0	17.25	25.75	7	12.5	17.25	2.5	1.25
3	2.75	5.25	3	0.5	18	24.25	15	10.25	14	9.5	1.25
1	0.75	1.75	0.75	0	18.5	35.75	12.5	8.5	24	6.25	0.5
1.5	2	6	3.75	0.5	14.5	27.75	21	9.5	23.75	3	1.25
2.5	3.25	8.25	1.75	1	18	34.25	7.5	17.5	10.75	2.75	2.25
1.5	3	4.5	2	0.75	12	32.75	6	8.75	18.5	2.5	0.5
1	1.75	5	1.25	0.25	13.5	28.75	10.5	6.75	22.5	5.5	0.75
0.25	1.25	2	2.5	0.25	20.5	25.25	8	15.25	20.75	5.25	1
1.25	1.25	4.75	1.75	0.5	13	17.25	6.5	5.25	10.75	5.25	0.5
1.25	1.5	1.75	0.25	0	20.75	15.75	12.75	7.5	29.75	6.75	0
5.5	0.5	0.75	0.5	0.25	23.75	12.5	7.75	4.75	25.75	6.25	0.25
0.25	1.75	3	0.5	0	14.25	14.25	18	9.25	20.5	6.25	0.5
0.25	1.5	2	1	0.25	21	29.75	9	13	16	5.5	0
1	2.75	5.75	2	0.25	19.75	31.75	10.5	13	23.5	3.5	0.25
2	1.5	5.25	1.25	0.5	21.5	18	10.75	12.75	9.75	2.25	1.25
0.25	0.75	3	1.75	0	8.25	13	9.5	6	12	1.25	0.25
1	1.75	3	1.75	0	14	25.25	4.5	15.5	18.25	9	0.25
1.25	1.5	3	0.75	0.25	13	24.25	11.75	9.5	14.5	6.25	0.75
1	1.25	3.75	1.5	0	17.5	19.25	11.25	13	13.75	1	0.5
2.25	1.75	7	2.5	0.25	28.75	26	10	13.75	23.25	4.25	2.5
1	2.75	5.5	2.5	0.5	20.25	27	18	13.25	15	4.5	0
2.25	3.25	7	3	0	13	24	6.25	14	12.25	2.25	1.25
1.25	1.25	1.5	0.5	0	10.5	13.25	5.25	5.25	20	3.25	0
3	1.25	4.25	0.5	0	18.25	9	4.75	5.5	23.75	3	0.25
0.5	1.25	4.25	1	0	18.5	21.25	10.25	15.25	16.25	7	0.25
0.5	2	4	1.5	0.25	27.25	13.5	14.5	20.25	12	4	1
0.75	2.5	1.75	1.75	0	13.25	15.25	11.25	5.75	17.75	1.75	0.25
0	0.75	1.5	1.25	0	16.75	28.25	7.25	11.25	25	10.25	0.5
1.25	1.75	4.5	2.25	0	18.5	27.75	11	13.25	18.25	2.25	0.5
0.5	2	3.5	2	0	13.25	30.5	12	15.5	20	2.5	1
0.25	2	3.25	2.5	0	9.5	25.25	5.75	11	14.75	2.75	0.25
1	1.25	7.5	1	0.25	14.25	13.75	13	5	12.5	9.5	0.25
1.25	1.25	3.25	0.75	0	19.75	18.75	8.5	7.25	23.5	6	0
2.25	3.25	4.5	3	0	14.75	32.5	5	14	20.5	3	0.25
1.75	3.5	6.75	5	1.25	16.25	30	17.25	13.25	17.5	1	1.75
0.75	3.25	4.75	2.75	0.25	17	24	5.75	10.5	14.5	4.5	0.25
0.25	2.25	5.75	1.75	0.25	11.5	19.75	8.5	12.5	20.25	1.75	0
0.75	1.5	2.5	3.5	0.25	12.5	17	9.25	7.75	13.75	7.25	0.25
0.5	2.25	3.5	1.75	0.25	19.5	22.25	8.25	10.75	25.5	1.25	0.5
2.25	2.5	5.75	2	0	15.75	23.5	11	9.75	19.25	1.5	1.5
2.5	3	9.5	1.75	0.5	9.75	24.5	9.25	11.5	17.75	2	1.25
1.5	1	4	2.25	0.75	17.75	34.5	12.75	22	22.75	3.5	1
2.25	2	7	2.5	0	13.25	26.5	6.5	7.75	12.5	2.75	1.5
0.75	1	4.5	0.25	0	15.5	37.5	7.25	9.25	21.75	3.75	0
0.25	1.5	2.5	1.25	0	10	26	3.5	4	15.75	1	0
0.25	0.75	3.5	0.75	0.25	13.75	38.25	3	4	13	1	0
1.5	1.75	7.75	2.5	0.5	12	31.75	6.75	12	9.75	3.25	1.5
0.5	1.75	4	0.75	0	8	17	9.5	11.75	14.75	1	0.5
0.5	0.75	3.25	0.75	0	5.5	16.75	11	3	9	1.75	0
1.25	1	2.5	1.25	0.25	9	19.75	8.5	11.5	12.75	4.25	0
1.5	1.75	1.5	0.5	0	16	20.25	14.75	7	27.5	5.75	0
4.25	1.5	1.75	0.5	0.5	11.75	10	3.75	5	17.75	4.5	0.25
3	1	3.75	2.75	0.5	16.5	19.25	6.75	9.5	12.5	3	0
1.75	2.5	3.5	1.75	0	24.75	28.25	8	14.5	17.75	6.5	0
1.75	1.75	4.5	1.25	0	12	13.5	14.75	10	14	3.5	0.5
0	1.25	3.5	2	0	18.25	27.5	17.75	13	19.25	2.25	0.25
1.25	2.75	5	3.75	0.5	24	23	12.5	12.75	20.25	1.25	1
1.5	2.25	5.5	1.25	0.25	13.75	21.5	10.5	5.25	15.5	5.75	1
0	1.75	3.25	0.75	0	14.75	25	9.5	9	16.75	5	1
1.5	2.5	4.5	1.75	0.25	8	19.5	28.5	8.25	25	6.25	0.5
0.5	0.75	7.5	1.5	0	11.25	19.25	8	15.75	20	3.75	0
0.75	1	2	1.75	0	15.5	18.5	6.25	5.25	22.25	2.5	0
0.75	2.5	4.5	1.5	0.25	9.5	23.25	9.25	12.5	17	0.75	0.5
1.75	2.25	8.75	3.75	1	11.75	26	6	9.25	18.5	3	1.25
1	2	4	1.75	0	11.75	18.75	9.5	7.75	14	4	0
0.5	2	6.75	1.5	0	15.25	22.25	7	14	11.25	6	0.5
0.75	1.25	2.5	1.25	0.25	13.75	27.75	9	16	24	2.5	0.25
0.5	0.5	4.75	1.75	0	14.75	25.5	11.25	9.75	25.25	6.5	0.25
2.25	2.25	4.75	3.5	0.25	11	25.75	10.75	13.75	17	1.5	1.5
1.5	1.25	7	2	0.25	17	25.75	7	8.75	15.25	2	2
1	0.5	3.25	1.25	0.25	9.5	12.5	8.25	3.5	8.25	1.25	0.75
0.75	2	3	1.25	0.25	20.25	16.5	23.25	14.5	13.5	2.5	0.75
1.5	2.75	3.5	0.25	0.25	14.25	10.5	4.25	7.25	15.25	3.25	0.25
0.25	1.5	2.5	1.25	0.25	19	22.5	5.75	14.25	17.25	9.5	0.25
1	2.25	3.25	2.75	0.25	13.75	16.5	9.5	15.75	27.5	2.5	1
1.25	2	4.25	1.5	0.25	16.5	21.5	5.75	9.25	20.5	3	0.5
2	1.75	4.5	1.25	0.25	11.25	16	8.5	2.25	15.75	2	0.5
0.75	1.75	6	0.5	0	15.25	28.75	9	11	15.5	5.75	1
1.75	2.25	7	3	0.75	15.75	26.5	5.25	9.25	17	6.5	0.75
3.25	3.5	6.75	1.75	1	20	33.25	15.25	16	18.75	5.5	1.25
2.25	2.25	8.5	3.5	0.25	12.25	17	17.5	8.25	12.25	1.25	2.25
0.5	1	3	0.75	0.5	7.75	13.25	5.75	8.75	12.5	3.75	0.75
1.25	2.25	2.25	1.5	0	7.25	10	3.25	3.5	12.75	1.25	0.5
0.5	3.25	4.25	0.75	0	17	22.5	13.25	10.5	17	2.25	1
1.25	1.25	1.75	3	0	8.75	13.25	4.25	9.5	10.5	1.25	0.25
2	1.75	2.25	2	0	16.75	19.5	7.5	10.5	18	3.25	0.5
1.75	3.5	7.25	1.75	0.5	17	29.5	9.5	15	19	4.25	0.75
2	1.25	8	1.75	0.25	10.5	19.25	7.25	5.25	16.5	3	1
1.75	3	4.25	1.25	0.25	14.25	32.5	6	10.75	20.75	3.25	0.75
4	4.5	7.25	2.75	1	10.25	28.25	7.75	6.75	13.25	2.25	1.75
2.5	2	8	3	0	14.75	29.5	16.25	16	15	6	1
2.25	2.25	4	2	0.25	16	27.75	12.25	15.5	24.25	2.5	1.75
3.75	1.75	9.75	2.25	0.5	10	27.5	5.75	5.5	12	0.75	1
1	1.25	2.25	1.25	0.25	10.75	21.5	5.5	5	15.5	3.75	0.25
0.75	1.5	4.75	1	0.5	11.75	15.75	10.75	7.5	20.5	3.5	0.5
1.25	0.75	3.25	0.5	0.25	16	14.25	4.25	5.5	10	4.5	0.5
0.5	1.25	4.5	1.5	0.5	15.5	19	15.25	16.25	16	4.5	0.5
0.5	3	3.25	2.75	0	10.5	14	14	8	15.5	2.25	0
1.25	2.25	4.25	2	0	10.75	18	16	13.5	18	0.5	0
0.5	0.75	2	0.25	0	12.75	22.75	7.5	6.5	13.25	6.5	0.25
1	1.25	4.75	1.75	0	14	18.25	13.75	9.75	19.25	2	1.25
0.5	1.5	2.75	0.75	0.25	11.75	23.25	4	4	10	6.25	0
3.5	2.5	6	2.5	0.75	17.75	27	12	11.5	25.75	3.5	1.5
0.75	1	4	2	0	15.75	24	8.75	9.5	13.5	1	0.25
3.5	1	1.25	2	0.5	9.25	15	2.5	7.5	16.75	4.5	0.25
0.5	1.25	4.25	0.75	0	17.75	16	3.75	13.25	10.25	6.25	0
0	1	2.5	1.25	0	12.5	17	9.5	5.25	13.5	7	0.5
1.5	2.5	4.5	3	0	18.5	16.25	8	6.75	18.75	4.75	0.75
0.5	0.75	1	0.5	0	13.75	15	4	9.25	14.25	2.75	0.25
1	1.25	4	1.5	0	13.25	19	10.5	8.25	18.75	0.5	0.75
2	3	7	2.25	1	20.75	34	14.5	17	25	4	1
1.5	2.25	4.5	2.25	0.5	10.25	26.75	6.25	9.5	13.5	1.5	0
4	2	8.75	1.75	0.5	15	29	13	16	17.25	3.25	2
2.5	3	7.25	2.25	0.5	13	28.25	6.5	9.5	21	2	1.5
1.5	1.75	5.75	1.75	0	16.75	29.5	12.25	11.5	13.25	2.75	1
1.75	2.25	4.5	1.5	0.25	15.75	21.25	8.75	11.75	20.25	3.5	0.25
1	0.75	1	2.25	0	9	17.5	3.5	8.5	26.25	5.75	0.5
1	0.75	4.25	0.75	0	7.75	17.75	4	4.25	10.75	2.75	0.5
1.5	2.5	4.5	1	0.5	10.5	17.5	9.75	14.25	14.75	1.5	1.25
1	1.75	3.5	0.75	0	11	16.75	11.25	10.75	13.75	4.75	0.75
0.5	2	6.75	1.75	0	15.5	19	12.25	7.75	13.75	1.5	0.25
1.75	2	5.5	1	0.25	13.75	23	12.5	3.75	23.75	4	0.25
3	2.75	7.5	0.75	0	7.25	26.25	4.75	11.75	17.5	1.25	1.5
2.5	3.75	11.25	2.5	0.5	12.25	26.75	18.25	11.25	15.75	4	2.25
1.75	2.25	3.75	2.25	0.25	11	31.5	7.25	23.5	19.5	2.25	1.25
2	2	6	2.5	0.5	13.25	27	5.25	7	11.25	1.25	0.5
3.75	2	5.5	2	0.25	8	30.25	8.25	6.5	15.5	3.25	1.75
1.25	1.75	4.25	1	0.25	9.5	24.75	6.25	9.5	17.75	3.75	0.5
1	1.25	1.75	1.5	0.25	11.5	32.25	12	11.75	17.25	5	0.75
0.25	0.25	5	0.5	0	11.75	23.75	3.75	4.75	11.5	0.75	0.25
0.5	2	2.5	1.25	0	11.25	39.5	1.5	6.5	16	0.75	0.5
1.25	3.5	2.25	1.75	0	15.25	64.25	6.25	7.25	33.5	2	1
0.75	3.75	0.75	2.25	0.75	17.75	47.75	3	5	32.25	2.75	0.5
0.25	2	2.25	1.25	0.25	17.5	62.75	2.25	3.5	23.75	1	1.25
1.25	2.25	1.75	1	0.25	14.25	52.5	6	5	25.25	1.25	0.75
1.5	4	0.75	2	0	15.75	50.5	8	3.5	23.75	1.5	0.25
2	2.75	3	1.5	0.25	16	45.5	6.75	4	23.25	1.5	0
0.75	2	2.25	1	0	10.25	37.25	1.75	5	20.5	1	0
0.5	1.75	1	1.25	0.25	13	38	7.25	10	23.25	1.25	0.75
2	2	1.5	1	0	22.75	30.75	11.25	11.75	33.5	1	2
10.75	3	1	1.25	0.25	14.5	16.75	4.5	3	20.75	9.75	0.25
21.25	3.25	3.25	3.25	1.5	18.25	16.75	5	9	27.75	12.5	0.5
1.25	2.5	0	2	0	9.25	11.75	4.75	2.5	22	3	0.25
0.5	2	0.5	0.25	0	10.75	5.75	6.5	3.25	14.75	1.5	0.25
1	1.5	2.75	0.75	0	14	12.75	4.5	3.25	12.75	0.75	0
0.25	2.5	0.25	0.75	0	7.5	11	2.75	3	16.75	3	0.5
8.5	3	1	0.25	0.5	11.5	12.5	11.75	5.75	19.75	3.75	0
1.25	2	0.75	1	0	16.25	23.75	13.75	15.75	30.25	9.25	0.25
1.5	1.25	2.5	1.5	0	15	24.25	7	10.75	14.75	5	0.25
1.75	1.25	4.25	1.5	0	20	22	18.75	16	18.75	3.5	0.25
2	1.5	5	0.75	0	22.25	17.25	8	13.75	6.5	0.75	1
0.75	1.25	0.5	0.75	0.75	15.25	27.75	6.75	12.25	26.25	11	0.5
1.5	2.25	3.5	0.75	0	14	22.75	10.5	10.75	21.75	4.25	1
1.75	3.5	3.75	1.75	0.5	22.5	36.5	13.75	13.75	19.75	4	0.5
1	2.75	6.75	2.25	0	13	20.75	8.75	10.5	16	2.5	0.25
0.5	1.5	3.25	0.25	0	15.5	29.25	4.25	16.25	23.5	2.75	0.5
2.5	1.25	5.25	2	0.5	9.5	13.5	9.75	3.5	14	2.25	0
0.5	1.5	1.75	0.25	0	11.75	17	11.25	4.5	12	4.25	0.25
1	3.5	4.25	1.5	0.75	16.75	39.75	13	17	26.75	5	0.25
0.25	0.5	1.25	0.75	0	11.5	12.75	6	10.5	12	3.25	1
1	2.75	2.5	2	0	18.5	20	7.25	15.5	15.25	4	0.5
0.75	1	1.5	0.5	0.5	12.75	25	8	10.25	19.25	8.25	0.75
3.25	2.5	4.5	3.5	1	12	15.25	13.5	6	13.75	3	1.5
0.5	3.25	3.75	1	0	19.25	23.75	12	17.5	12.75	1	0.75
5.5	2.25	9	3.25	0	15	30.25	9.75	15	13	1.5	0.5
1.25	2	5.25	2.5	0	8.25	22	6.5	9	16.5	2.25	1.25
2.5	3	5.75	1.5	0	20.75	34.75	10.25	12.75	15.5	3.75	1.25
1.75	1.75	5	2.25	0.25	10	15.5	11.5	5.5	12.25	3.5	0.25
2.25	2	5.75	2	0.75	10.5	16.25	5.75	7.5	18.25	2	1.5
1	2.25	2	1.75	0.25	13.25	27.75	9.25	5.5	14	5.25	0.25
1	1.5	3.25	1.25	0	17	26.5	18.75	11.5	20.5	5.5	0
0.25	1.5	3.5	1.5	0	12.25	10.75	10	10	19	4.75	0.25
2	3.75	4.5	1.75	0.25	13.75	15	5.75	13.25	14.5	2.25	0.5
1.5	1.5	5.25	1.75	0	15	23.75	11	10	20	7.75	1.25
1.25	1.5	2	1.75	0.25	6.75	8	4.75	4.25	6.75	3.5	0.25
2.25	3.25	5.5	2.5	0	9.25	15.75	10	11	20.25	2.5	1.25
1.5	3	5.25	1	0	14.25	19.5	5.5	9.5	15	4.75	0.25
1.5	2.25	2.5	2.5	0	13.5	20.25	16	7.5	21.75	2.75	1.75
0.75	0.5	3.5	0.5	0	12.5	11.5	13	3.75	10.75	3	0
1	1.75	4.25	0.75	0.25	16	19.75	11	10.75	11	3	0.75
0.75	1.25	3.75	1.75	0.25	17.25	32	11	16.75	22	3.75	0
0.25	2	3.5	1.75	0.25	14.5	20	7.25	8.5	18.25	0.75	1
1.25	2.75	5.5	2.5	0.75	20	30.75	13.5	17	20.75	2.25	1
2	4	6.5	3	0.75	13	24.25	10.75	9	12.25	3.5	2.25
1.25	2.5	3.75	2.75	0.25	15.25	27.5	5	9.25	17.25	6	1
2	3.25	4.75	1.75	0	17.5	31.75	11.75	8	13	5	0.5
2.25	3.25	10.5	1.75	0	10.75	28.75	9.5	7	15.25	4	2
4.75	3	6.5	3	0.5	17.75	20.75	6.5	13.25	17.75	1.5	1.25
0.25	1.25	3	0.75	0	13.75	25	4	10.25	6.5	1.75	0.5
1	0.5	3.5	0.25	0	9.5	13	4.75	9	11.25	2.75	0.25
3.5	2	7.75	3	0.75	12	15.75	12.25	14.5	13.75	6	0.5
0.25	1.5	2.25	0.75	0	8.75	13	6.75	11.25	18.5	1.75	0
0	1.5	1	1	0	12	15.75	9.25	3.25	12.75	4	0.25
0.5	1	4	1.75	0	15.25	11.25	16	19.25	10.25	1.25	1
0.75	3.5	7	1	0.25	16.75	28.75	9.75	9.25	18.75	2.75	0.5
2	2	4.25	1.75	0.25	18.75	15.5	15.5	10	18.5	1.25	0
2.5	1.5	5.25	1.75	0.25	9.5	27.75	5.25	11.75	15.75	7.5	0.5
2.75	2.25	5	2.5	0.75	23	34.75	10.5	10.25	23	5.75	1.75
2.25	2.5	7.75	2.75	0.75	10.25	30	9.25	5.5	12.25	1.25	2
1	1.25	3.75	1.5	0.25	12	26.75	7	7.5	19.5	3	0
3.25	2.25	7.75	1	0.5	11.5	28	7.75	12.75	25.5	9	0.5
0.5	1	3	0.75	0.25	11.25	31.75	3.75	6.25	20.75	3	0.25
0.75	1.5	1.75	0	0	9.5	41.25	7.25	6.25	25.75	1	0.5
0.5	3.5	1	1.75	0	12.25	57.75	6	7.25	29.5	1.75	1.25
0.75	2	1.5	1	0.5	12.5	53.25	5.75	6.75	24.5	1.25	0.5
2	2.25	1	2.25	0.25	11.25	51.75	3	8.75	28.75	1.25	0.5
0.25	2	2.75	1	0	15.25	55.5	6	6	24	0.75	1.5
1	1.75	2.5	1.75	0.25	14	49.75	3.75	9.5	24.75	1.75	0.5
1.75	4	2.5	2	0.5	22.25	67	15.75	15.75	25.75	2.25	1.75
0.75	3.5	1	1.25	0.5	16	56.75	5.5	2.75	29.75	1	0.75
1	0.75	2.25	1	0	17	34.5	7.25	6.75	21	0.25	0.75
1.5	4	2.25	1.25	0.25	21.5	34.5	14.25	7	23.75	0.75	2.75
1	3.5	3.25	1.25	0.25	26	35.75	11.5	10	26.5	0.25	2.75
1.5	3	1.75	0.75	0	26.25	30.75	9.25	8.25	27.75	1.5	1
2	2	4.25	1	0.25	25.5	42.5	9	11.75	21	1.25	0.75
1.5	3.25	1.75	0.75	0	23	35.25	15.75	11.5	26	2.25	1.25
0.5	1.5	1.25	0	0.25	7.75	23.5	10.25	5.25	27.75	0.25	1.5
1	2.75	2.75	0.5	0.25	18.25	34	17.25	10.5	23	0.75	0.5
1	2.25	1.5	0.25	0	16.5	16.75	7.5	2.5	17	3.75	0.75
5.75	3.25	2.25	1	0.75	18.75	13.75	5.5	7.5	34.5	8.25	0.5
0	1.5	0.5	0.25	0.5	12.25	10	3	1.25	16.25	0.5	0.25
0.5	0.75	2.25	0.5	0	11	10.75	7.25	5	18.25	2.5	0.5
0.25	1.75	4.25	1	0	11.75	10	13	12	20.75	2.25	0.75
0.5	1.75	1.5	0.25	0	18.25	27.75	17	14.25	19.5	8.25	0.25
0.25	2	0.5	0.25	0.5	12	12.75	5	9.25	19.75	6.5	0
3	2	1.5	0	0.5	12.75	14.25	3.5	7.75	21.5	4.25	0.5
1.75	3.75	3.5	0.5	0.5	20.25	25.25	10	21.75	24	6.75	0.5
0.75	2.25	2	0.5	0.25	9.25	18	7.75	7.75	25.5	3.5	0
0	1.75	1.75	0.75	0	8	17	3.25	4.5	12.5	7.75	0.5
0.25	1.25	1.25	1	0	9	18.25	8.75	2.75	9.5	3.75	0
1.5	3	4.25	0	0.5	16.75	18.5	13.5	10	17	3.25	0.5
1.5	1.5	6.25	1.75	0.25	21	39	15.25	21.25	27.75	6.5	0.75
2.5	5	5.75	3.75	0.5	14.25	30.5	7.5	9.25	16	3.75	1.25
1.25	4	3.25	2.75	0.5	9.5	18.5	15.75	8.5	11.75	2	1.5
1.5	2.5	3.75	0.5	0	8.25	16.5	5.25	3.75	15.5	3.5	0.5
0.75	2.75	3.25	1.25	0	7.25	19	8.25	29.75	11.25	1.5	0.75
0.5	0.25	4.25	0	0.25	21.5	18.75	9.75	12	9	2.75	1
0.25	1.5	1.5	0.25	0.25	10.5	15.5	4.75	7	16.25	6.5	0.25
0.25	2.25	3.75	0.75	0	10.5	19.25	11.75	8.5	17.5	3.5	0.25
1.75	2.5	3.25	2.25	0.25	11.75	23.75	10	8.75	11.25	3.25	0.75
1.25	1.25	5.25	1	0.5	10.75	26.5	3.75	8	17.25	1.75	1
1.75	0.75	6	0.75	0.25	6	17.25	6.75	8	14.25	3.75	1
0.25	1.75	3	1	0.25	12.5	13.5	5	13.5	11.5	3	0.75
0.75	2	2.25	1	0	24.75	15.5	7	9.5	14.75	5	0.25
1.75	1.75	4	1.5	0	19.75	18.5	10.25	13.75	19.25	5	1
1.5	0	4.75	0.75	0.5	11	6.25	7	7.75	13.75	2	0.75
1	1.75	2.25	1.25	0.5	16.25	26.25	6.5	11.75	15	8.25	0
1	1.25	4	1	0.25	9	11	5.5	4.75	8.75	2	0.75
1	1.5	4.75	1.25	0.5	19.5	22.25	11.25	8.5	17.75	3.25	0.5
2	2.75	6.75	2	0.5	13	32.25	14.75	15.25	18.75	2.5	1.5
1.25	1.5	3.5	0.75	0.25	15.75	23.5	9.75	13.75	16	2.25	0.5
2.5	3.25	6.5	2.75	1	16.5	19.25	13	21	13.5	2	1.75
2.5	3.25	4.25	2.25	0.25	11.5	22	9.5	3.25	11	6	0.75
1.75	1.75	4.75	1.75	0	15.5	35.25	7	15.5	23.75	2.75	0.75
3.75	4	9.5	2.75	1	20	36.25	8.5	14.75	15	2.75	2
1.5	0.75	4.75	1.75	0.25	12	28.75	11.75	7.75	16.5	5.5	0.75
2.5	3	7	3.5	1.75	8	24	9.5	8.25	16	4	1.75
0.5	2	4.75	1.5	0	9.25	26.75	11.25	4.75	19.75	4.25	0.75
2	1	4	1	0.5	18.25	12.5	13.5	9.25	10.25	1.75	1
0.5	1.25	4	1.5	0.25	12.5	17.75	5	10.5	16.75	1.25	0
0.75	1.75	2.75	1.5	0	9.25	21.25	7.25	10	18.25	7.5	1.25
0.75	0.75	3.25	1	0	7.75	19.25	13	4.75	12.5	1.5	0.25
1	2.5	3.5	1.25	0.5	19.25	30.75	8	14.25	27.25	3.5	1
0.25	1	4.5	1.75	0	13.5	14	4.75	12.5	10.5	3.25	1
1.25	0.5	2.5	0.75	0	12.75	18.75	3.75	8.25	15	2.75	0.5
6	3	5	3.5	2.25	14.25	25.75	13.25	10.75	22.75	10.25	1.25
1.75	2	6	2.25	0.25	7.25	14.75	20.75	4.25	8.5	1	1.25
0.75	3	4.75	1.75	0	19.75	25.25	11	13	17.75	0.5	0.5
0.25	1.5	4	1	0.25	12	17.25	7.75	12	20.5	4.75	0
1.75	2	4.5	2.5	0	7.5	16.25	6.5	3	9.75	1.25	1.5
1.25	1	4.5	2	0.25	11.75	22.25	8	12.25	18	5	1.5
1	1	5.25	1.25	0.75	14.25	29.5	11.5	10.25	18	6.25	0.75
1	3.25	3.25	1.5	0.75	14.5	25.75	9.5	10.25	23.75	6	1
0.75	2	4	1.75	0	14.25	21.5	7	14	17.5	3.5	0.75
0.5	1	3.25	0.75	0	7.25	14.5	3	6.5	12.25	2	0.5
1.5	1.5	5	1.5	0.25	7.75	14	5.75	8.75	16.75	4	0.5
1.5	1.5	4	2.25	0.25	14.5	21.75	16.75	13	24	4	0.25
2.5	1.75	2.75	0.5	0.25	18.5	10.25	4.5	7	20	4.75	1.5
0.5	1.5	2.75	0.5	0	14	12.25	7	9	12	3.25	0.5
1	2.25	5.5	1.25	0.25	16.75	20.75	14.75	8.5	21	3	0.75
2	1	5.25	1.25	0.5	12.75	16.75	19.5	10.5	16.75	2.25	0.5
1.5	2.75	1.75	1	0	9.5	26.25	7.75	7.75	16.5	1.25	1
1.5	3	4.75	1.5	0.25	14.5	21.25	15	6.5	15	5.25	0.75
1.25	1.25	3.25	1.25	0.25	11.5	17.5	6.75	9.5	14.75	5.5	1.25
0	2	4	0.75	0	7.5	10.5	3	6.75	13.75	4.75	0.25
1.75	2.75	5.75	2.25	0.5	13.5	26.5	12.5	11	16.5	2.5	0.25
2.25	1.25	4.25	2.5	0.5	9.5	24.25	5.5	15.25	17.5	1.75	1
1.5	2.25	4.75	1.75	0.5	12.75	29.25	13.25	8.5	14.5	1.25	0.75
0.75	1.5	3.25	2	0.5	11.5	18.25	6.5	1.5	11.5	1.25	0.5
2.25	0.75	4.25	1.5	0	10.25	19.25	12	7.5	16.5	4.25	0.5
1	2.75	5.5	1.25	0	16.5	20.5	10.75	10	16.75	5	0.25
2.75	5	7.75	3.25	0.75	14.5	29.5	9	19	20.75	3.5	2
1.5	0.75	6	2	0.25	13	22	12.25	9.25	15.5	1.25	1.5
3.25	1.75	4.5	1.5	0.5	8.75	30.5	6.25	6	11.5	4.25	0.25
1	2.25	2.5	2.25	0.25	9.25	27.5	3.5	14.25	15.25	1.75	1
2.25	1.25	7.5	2.25	0	13.75	21.75	13.25	8.75	21.75	6.25	0.75
1	2	6.5	1.25	0.5	9.5	25.5	17	11.75	18.75	0.75	1.75
3.75	3.75	6.5	4.5	1.5	15.5	31.75	7.75	12.25	16	2.25	1.5
1.75	4.25	6.5	1.75	0	11	37.25	6.5	6.5	11.5	1.5	0.25
1.75	0.75	3	1	0	11	27	5.75	15	12.5	0.5	0.75
0.75	3.75	5.25	1.75	0	11.5	26.5	9.25	9.25	13.5	4.5	0.75
0.75	1.25	2.5	1	0.25	9.5	11.5	2.5	4.75	9.75	2.5	0.25
1	3.75	1.5	2	0	15	32.5	19.5	19	25	3.75	0.75
1.75	1	2.75	1	0	10.25	10.5	4.75	2.25	17	2	0
1.5	1	4.25	1.25	0.25	21.25	12.75	8.25	11.75	15.5	1.5	1
1	1.25	2.75	2	0	11.5	27.5	6.75	18.25	28	4.5	0.25
1.25	1.25	4.25	1.75	0	6	20	4.25	13.75	18.5	4.25	0.25
1.5	1.5	5	1.25	0	13.5	26	7.5	12.5	16.5	4	0
2	3.5	4.75	2.5	0.25	11.75	18.5	14.25	15.25	15.5	2	0.75
1.5	2.5	3.25	1.25	0	16.75	20	12.5	12.75	17.5	7	0.5
1	1.25	3	1.75	0.25	6.75	21.5	6	4.5	9.5	1.5	0
0.5	1	4.5	2	0	14.75	35.75	14.75	18.25	16.75	5.5	0.75
1.75	4.25	5.75	1.75	0.5	13	19.5	16.5	10.75	20.25	2.5	2.25
2	3.75	5	2	0.75	14	24.5	8.75	13.25	15.5	5.75	1
0.25	1.5	2.25	0.75	0.5	9.75	15.25	15.25	4.5	19.25	2	0.75
2.25	3.5	5.5	1.75	0	13.25	29	8.25	10.25	18.25	3.5	2.25
0.75	2.25	1.75	0.75	0.25	20.25	13.5	2.5	6	15	2	0.5
2	2.25	3.25	2.5	0.25	24.5	17.5	7.25	8	21.25	3.75	0.25
0.5	0.5	3	0.5	0	12.5	16.5	7.5	7	7.75	2.25	0.5
1.75	2.25	6.75	1	0	14.5	16.25	8.25	13.5	10.5	1.5	0.75
1.25	1.5	2.75	0.75	0.25	12.25	14.25	13	15	14.5	2	1
1.25	2	2	1.5	0.5	15	19.75	13.5	10.75	17	6.5	0.75
2.5	3.5	4	2.75	0.75	15.5	15.75	6.5	3.5	19.75	4.25	0.5
3	2	5.25	1.25	0	9.75	15	14	7.25	15	1.25	1.25
0.75	2	3.5	2.5	0	20.75	22.5	12	13.5	17.75	3.25	0.5
1.25	1.5	4.25	1.5	0	12.75	28	11	15.5	16	1.75	0.5
0	1	3	0.5	0	9.75	26	4.25	3.5	10.75	4.25	0.25
3.25	3.75	5.5	2.25	0.25	14.25	35	7.25	13	20.25	4.5	1.25
2.25	2.5	5.75	1.5	0.75	9	24.75	7.25	17.25	22.5	2.5	0.75
3	3.75	3.5	3.25	0.25	6.75	20	5.75	6.5	14	3.5	2.5
0.75	0.75	7.25	1.5	0.5	17	27.75	6.25	10.5	12.5	2.75	0.5
1.5	1.5	8.25	1.25	0	11.75	26.5	5.5	11.5	14.25	0.5	2.25
1.75	0.75	4.25	0.75	0	9	23	9.25	2.25	12.25	3	1
0.5	1	3.75	0.5	0.25	15	28.75	3.75	5.25	16	1.75	0.5
0.25	1.5	1.25	1	0	14.75	27.75	2.75	4.75	15.75	0.25	0.5
1.5	3	7.75	1	0.25	15.5	29.25	6	6.5	19.5	1	0.5
1.25	3.25	2.75	1.25	0	17.5	45.75	3.25	6	21.5	2.75	1
1.25	6	0.5	1.25	0	20	46	3.5	7.75	25	1	0.75
1	2.25	0.75	1	0	15.25	16.5	9	4.25	14.25	1.75	0
2.75	1.5	1.25	1	0.25	20.75	13.25	4.5	2.25	26.5	4.75	0.25
1.75	1.5	1.25	0.25	0	15	11	5	5.5	15.75	3.25	0
0.25	1.25	1	0.25	0	15	7.75	13.25	1	18.5	2.75	1.25
6.25	3	2.25	1.5	0.25	16.75	14.25	6.25	7.25	26.5	6.25	0.5
1.75	1.75	1.75	0.25	0	17.5	20	5.5	8.25	19.75	8.25	0
0.25	0.75	2.25	0.25	0	16.25	26.5	12.25	11.25	15	8	0.25
1.25	2.75	3	2.5	0	15	21.25	5	11	12.25	4.5	1.25
1	2.25	4.75	1.25	0.25	13.25	20.25	6.25	4.5	17	1.75	0.5
1	2.5	2.5	0.75	0.25	18	27.75	17.5	17.25	18.5	1.5	0.5
1	2	5.75	1.5	0	13	29.5	8	15.75	23.25	2.5	0.25
0.25	0.5	1.5	1.25	0	7.5	16.5	10.75	2.75	12	2.5	0.25
1.5	2.25	5.75	3.25	1	15.25	23.25	11.5	2.5	15.25	1.5	0.75
1.25	1.75	3	1.25	0	7	14.75	5.5	3.25	16	1.75	0.5
0.75	1.5	0.75	1	0	18	6.75	4	4.5	17.25	1.75	0.5
1	1.5	2	1	0	16.25	7.25	3	5.25	12.75	1.75	0.25
7.5	2.5	4	2.25	1.75	14.5	10.5	3	11.5	16.25	5.25	0.75
1.5	4.25	3.75	2.25	0.25	16.25	24.25	3.25	10.5	22.25	14	0
6.5	5.75	2.5	2.25	0	27	18	9.5	8.25	33.75	8.5	0.75
4.75	7	1.75	1.5	0.25	47.5	15.5	27.5	24.5	39.25	8.25	2
12	5	2.5	2	0.5	42.25	23	23.25	22.75	31.5	11	1.25
8.5	4.25	1.25	1.25	0.25	26	14	18	13.25	27.75	5.5	0.25
1.75	3	3.25	1.75	0	20.75	10.75	17	4.25	26.25	3.75	1.25
0.75	2.75	2	1.25	0.5	25	8.25	17.75	5	19	4	0.5
12.5	4.25	3	3.25	0.5	44.25	21	38.25	20.75	34	5.5	2.25
12.5	6	2.5	2	1.25	28.5	9.5	32	11.5	33	4.25	1.75
1	0.5	1	1.25	0.25	14.75	16.5	2.5	3.75	17	1.25	0
1.5	5	2.75	2.25	0	22	36.75	6	13	21.75	7.5	0
1.5	2	7.25	1.25	0	16.5	26.75	4.75	5.25	11.75	1.75	0.25
1.5	1.25	4	0.75	0	18	27.5	15	10.75	22.25	6.5	0.25
2	1	5.25	0.75	0	18.5	12.5	9.5	13	9.75	2.25	1.25
0.25	1	1.25	0.25	0	12.75	10.75	5.75	4.5	8	1.75	0
0.5	2	2.75	1.25	0.5	17.75	27.25	6.5	13	19	15	0.75
1	1.75	2.75	1.25	0.25	15.75	27	4.75	11.25	19	1.75	0.5
2.25	3	6.5	2.75	0.75	15.25	13.75	7.25	19	11.75	1.75	0.75
0.5	2	2.75	1	0.25	17.75	9.5	9	8.75	12.75	3	0.25
0.75	2.75	1.5	2	0	22.75	21	10.25	7.75	25.25	1.25	0
1.75	1.75	5.25	1.25	0.5	16.5	18.25	20.25	16.5	18.5	1.5	0.75
0.75	2	2.75	1.25	0	13	19	6	7.25	13.25	4	0.75
1.75	4.25	4.25	2	0	16.75	27	10	15.75	26.5	13.25	0.75
0.25	2.75	2	1.75	0.25	5.75	17.5	2.75	12	14.5	2	0
1.5	3.5	5.5	2.75	0.25	10.75	12.25	9.25	8.5	15	1.25	0.5
0.25	1.5	2.5	1.75	0	9.25	11.25	6	6	14.5	6.25	0
0.75	2.25	3.75	2.5	0	10.75	21.5	9	4.25	22.5	8	0.25
1.5	0.5	3.5	1	0.25	13.75	15	7.25	17	12.75	3.25	0.5
1.25	2.75	1.75	3	0.5	8	22	5	9	12.5	0.25	1
1	2	1.75	1.25	0	16.25	25.75	17.25	16.25	23.25	3.5	0.75
1.75	3.25	3.75	3.25	1	13.5	30	11.25	19	24.75	5.75	1
2	1.5	6	3.25	0.75	12.75	17.5	3.75	4.75	19.5	5.5	2.25
2.25	2.5	5.25	3	0.25	11	23.75	8	10.25	11.75	2	1.25
1	2.25	3.5	1	0	16.25	24.75	14.5	14.75	21.25	4	1
2.5	3.25	6.75	2.5	0.5	13.75	27.25	5.75	5	13.75	1.25	0.75
0.75	2	2.75	1.75	0	9.75	15.5	3.5	3.25	6.75	1.5	0.25
0.5	0.5	1.5	0.25	0	9.25	10.75	4.5	3.75	5	7.75	0.25
1	1.75	2	0.75	0	24.25	15	3.25	14.75	19	6.5	0.5
0.25	2	1.25	1.5	1	27.25	8.5	9.5	8.5	23	6.5	0.5
1.25	2	1.25	0.75	0.25	22.5	10.5	8.5	2.25	13	4.5	0
0.25	1	4.5	1	0	16.5	9.75	10.25	8.75	14.75	3.25	0.5
1.25	2.25	1.5	1.25	0	18	8	5.75	5.25	18	6.5	0.25
0.5	2.25	2	0.75	0.25	20.5	20.25	4	11	18.25	18.25	0.25
0.25	2	1.75	1	0	11.5	18.75	6	9	11.75	1.25	0.25
1.75	1.5	4.75	1.75	1	12.75	19.25	7	9.75	25.25	1.75	0.25
0.75	0.5	2.25	1.5	0	31.75	14.5	15.75	7.5	17.5	4	0.25
2	3.5	4.25	2.25	0.25	19.25	27.75	10	12.75	18	3	0
0.5	0.75	4.75	1.75	0.25	15.5	20.5	9.5	8	18.25	2.75	0
1	2	4.5	1.5	0	8.5	18.5	7.5	5.5	10.5	2.5	0.25
0.75	0.75	4.25	0.5	0.25	11.25	6	3.25	1.25	14.5	2	0.25
0.5	2.75	1.75	2	0	13.5	27.5	10.75	11.25	15.5	2	0.5
0.75	2.25	3	1	0.5	13.25	17.5	7	10.25	19.25	2.5	1
1.25	2	3.75	0.75	0.25	8	12.5	4	3.25	19.25	2.25	0.25
0.75	3	1.5	1.25	0.25	16.5	24	8.5	13.25	20	3.25	0
1	2.75	4.5	2.25	0.25	14.25	26.25	8.5	7.25	14.25	5	1.25
0.75	1.25	4.75	1.75	0	11.25	18.75	6.75	9	16.25	2	0.5
1	2.5	2	1.75	0	12.5	24.75	9.5	9.25	17.5	1	0.25
0.75	2.75	4.25	3.75	0	14.5	38.5	6.75	16.5	25.75	7.75	0
2.25	2.75	4.75	3	0.5	11.5	25.25	9.25	9.25	15.5	2	1.75
3	3.75	4.75	3	0.5	11.25	30	7.75	10.75	14.75	3.75	1.5
0.75	1.25	5	1.75	0	8.25	13	5	7	8.25	1.5	0.5
1	1.75	3.75	0.5	0	10.5	13.5	8.25	9.5	15.5	3.75	0.5
0.5	1.25	2.75	2.25	0	11.25	16	10.5	4.75	14.25	5	0.5
0.25	1.25	1.5	0.75	0	10.75	11.5	3.25	5.25	9.75	2.5	0
1	1.25	4.25	0.5	0.25	13.25	17.5	14	12	17.5	1.25	0.25
0.75	1.75	5	2	0	12	28.75	9	11.75	16.25	1.25	1
0.5	1.75	3.5	1.5	0.5	11.25	22.75	5	6.25	17.75	3.75	0.5
2.25	0.5	1.5	0.5	0	13.5	25	7.75	7.25	20.25	4.25	0.5
1.5	1.5	2.25	1.75	0.25	12.75	31.25	6.5	6.75	15.25	0.75	0.25
1.5	1.25	5.25	0.75	0	10.25	8.25	7.75	3.5	11	3.75	1
0.25	0.75	2.25	1	0.5	10.75	19	8.5	11	18.75	8.75	0
1.25	2.5	3.5	0.5	0	10	9.5	13	4.75	19.5	4.75	0.25
0.75	1.25	1	1.75	0	16.5	8.5	4	7	15.75	4	0.25
0.5	1.5	1.75	0.75	0	13.75	27.25	8.25	12.25	24	8.25	0
0.25	2.5	3.25	2	0.25	12.5	15	5	8.75	18.75	3.25	0
1.25	1.75	5	1.75	0	14	18.5	11.25	13	12.25	2	0.5
1	4	3.5	3	0	11.25	21.5	11.75	6.75	22.25	1.75	0.25
0.25	1	2.5	1	0.25	8.25	26.75	9.5	7.75	19	2.75	0.75
1	1.5	4.75	0.5	0.5	8	24	7	13	15.25	2.25	1
1.5	3.75	4.5	3.5	0.25	16.25	23.25	8	10.25	21.5	4.5	1.75
2.5	2.75	5.5	1.5	0	11.5	32.5	6.75	13.25	16	1.25	1
0.5	3	4.25	1.25	0	10.5	33.75	8	17.5	20	7	0.75
2.5	3.5	5.5	1.5	0.5	6.25	21.75	13	3.5	13.25	1	0.75
4.75	3.5	8.75	2	0.5	10	29	13.25	17.5	11.75	1	1.75
0.5	2.5	3	2	0.25	12	34.25	6.75	13	20.5	9.5	0.25
2.25	2.5	3	1.25	0	6.25	13.5	1.75	3.25	9.25	1.25	1.25
0.5	1	1	1	0	13.75	16.25	3	3	8	1	0.5
1.5	3	0.5	1.5	0	16.5	48.5	6	10.25	27.25	1.75	1
0	2	1.75	1.25	0	20.5	34.5	9.25	11	26.25	0.25	0
1	1.5	2.5	1.75	0.5	13.75	28.75	4.5	10.5	26.25	1	0.5
1.5	1.25	3.25	1	0	12.75	30	12.25	5.75	28.5	1.75	1
2.75	3	2.25	3	0.5	19.25	58	8.25	9.75	29.5	7.5	2.75
0	2	0.25	1	0	16	29.75	9	7	12	1	0.5
3	3.75	2.5	2.5	0.25	14.75	40.5	12.5	6.5	31	2.5	0.5
0.5	1.5	1.5	0.5	0	22.25	38.75	25	2.75	27.25	1.25	1
0.25	1.5	1.75	0.25	0	13	21	9.75	1.5	10.5	3.75	0.25
1.5	1.75	0	0.5	0.25	43.25	20.5	12.75	5.5	21.25	8.25	1.5
5	1.75	1.5	0.25	0	20.75	9.75	6.25	1	18.75	5.75	0.75
0.75	2	0.75	0.5	0	26	16.75	4.5	3.75	19.75	5	0.75
7	2	0.75	0.5	0.5	17.75	9.75	4.5	4	23.25	3.25	0.25
0.25	1	0.75	1.25	0.25	15.75	26.25	12.25	17.25	29	10.5	0.25
1.25	1.25	2	0.25	0	16.25	9.25	5.25	3	11.25	2	0.25
0.5	2	0.75	0.25	0.25	15.75	9.5	5.5	4	21.5	0.75	0.25
10.75	2	3.5	2.5	4.5	14.5	27.75	16	15.25	25.75	11.75	0
0.75	2.5	5	1.25	0	11	17.25	11.75	2.75	19.25	3	0.5
0.25	2.5	3.75	1.25	0	20	9.5	8.75	9.75	10.25	0.75	0.5
0	1.75	1.25	1	0.25	15.75	17	12	6	11.5	5.25	0.25
0.25	2.25	1.5	1.5	0	18	32.25	5.5	19	23	11	0.5
2	3	3.75	3.75	0	7	34.25	6	11.25	15.25	2.5	0.25
2	2.25	4.25	2	0.25	7.5	25.25	5.5	5	20	1	1.25
1	1.75	4.25	1.75	0.25	13.5	16.5	5.75	8.25	20	4.25	0.75
6	1.25	2.5	1.25	0	20	7.75	13.25	2.75	20.5	7	0.25
1	1.75	1.25	1.25	0	10	8.5	6.75	3.25	10.25	1	0
0.5	2	1.5	0.5	0.25	11	23.25	19.75	14.25	19	5.75	0
0	1.25	2.25	0.5	0	12	29.75	2	13	15.75	10.5	0.25
0.75	2.25	3	1.5	0	21.25	16	7.5	15.25	15.5	1.75	0
1	2.75	3.25	1.75	0	12	31.75	10	20.75	23.25	2.75	0.5
2.25	1.25	6.75	2.5	0.25	7.25	22.25	8	4	15	1	0.75
0.5	1.5	2.75	1.25	0	11	18	4	11.25	18	3.5	0.25
1	1.25	1	1	0	18	7	3.25	2.75	12.75	2	0
0.25	1.25	1	0.5	0	9	7.75	6	3	12	1.5	0
2	1.25	3.25	1	0	10.25	23.75	7	16.5	17	3	0.75
0.25	1.5	0.5	2.25	0	10.75	26	5	9.25	11.75	4.25	0.25
2	2.25	5.5	3.25	0	10	26.5	12	7.75	17.25	4.5	1
0.5	2.25	4	2	0	18	28.5	14.25	21	27.25	5	0.75
0.5	2.25	5.25	2.25	0	7.75	23.75	4	2.75	9.75	1	0.25
1.25	1.25	4.5	1.25	0	12.75	37	9.5	18.75	17.75	0.75	0.75
1.5	2.75	6.25	1.75	0.5	10.75	19.5	15	14	12.75	1.5	1.25
1.25	1.25	4	0	0.25	8.75	31.75	2.75	3.75	10	2.75	0.5
0.75	1.5	3.5	2	0.25	5.75	18.75	24.25	2.75	18.75	1.75	0.5
0.25	0.75	4.25	0.75	0.25	11.25	33.25	17.25	7	12	0.5	0.75
0.75	1.25	2	1.5	0	9	45.25	0.5	3.25	19	0.75	0
0.75	2.25	0.75	1.5	0.25	11.75	63.75	5.25	6.5	18.25	2	1.75
0.5	2.75	3	1	0	13.75	49.75	4.5	6.75	21.5	1.5	0.75
0.25	2.5	1	2	0	14.75	55.5	3	9.25	26	1.25	1.25
0.75	3.75	4.5	1.75	0	18	50.75	13.75	13.75	38.75	2.25	3
1.25	2.25	1.5	0.5	0.25	4.75	35	11.25	3	24.25	1.5	0.5
1	3.75	0.75	1.5	0.25	15.5	67.75	4.5	6.75	25.25	1.75	0.75
0.75	4.25	2.5	2.25	0.25	12.75	52.5	9.5	11.5	26.25	2	0.75
1.25	2.25	2.75	1.75	0	11.75	58.5	3.5	12.25	31.25	2.5	0.75
1.5	2.5	1	1	0	19.75	42.25	1.25	8.5	24	1.25	0.25
0.5	2.5	2.5	1.75	0	8.75	46.75	4.75	8.5	24.25	1.5	0.25
1	1.25	1.25	2.5	0.25	7.25	48.25	4.5	7.75	19.5	1.25	0.75
0.75	3	1	2	0	12.5	49.5	3	6.75	23	1	0.75
1.75	2	0.5	0.5	0.5	4.75	46.75	0.5	6.75	16.5	1.75	0.75
0.5	1.75	2.25	1.25	0	10	36	2	11.5	22.75	1.25	0.5
1.75	2.5	4.25	2.5	0.25	19.5	23	4.5	17	38.25	2.75	1.25
1.75	3.25	2.5	3	0.25	18.75	47.75	15	19.5	36.5	2.25	4.5
1	2.5	0.75	1	0	15.75	21	15.5	8.75	25.75	0.5	0.75
1.75	3.75	2.5	2	0	20.75	33.25	11	9.5	28.75	1.5	1.75
1.25	1.75	1.75	1.5	0.25	24.75	30	9.75	7.5	33	1.75	2.25
0.75	1.5	2	1.5	0.25	12.25	39.75	8.75	8	21.25	1	2.25
0.5	3	2.25	1.75	0	8.5	55	16.25	14.75	25.5	3.5	1
1	1	0.25	1	0	15	39.25	3.75	9.25	25	2.75	0.75
1.5	2.5	1.25	1.25	0	13.75	41.25	10.75	17.5	28.75	2	0.5
0.75	1.75	2.75	1	0	16.5	19.25	8	20.5	20.5	1.75	0.25
0.5	0.75	2.25	2	0	10.25	39	9.5	12.75	18.25	2	0.25
0.75	1.25	0.5	3	0	9	34	8.5	13.75	24.25	4.5	0.25
1.75	2.5	2.25	2.5	0	8	34.25	8.75	10	25.5	2	0
1.75	1.75	1.5	0.5	0	13.5	43.25	9.75	13.5	25.5	3.25	0.75
0.5	1.25	0.25	0.75	0	17.75	19.75	7.75	4.25	17	0.75	0.25
0.25	1	0.5	0.5	0	17.25	11.5	16.75	1.25	5.25	3.75	0
1.25	2.25	0.75	0.25	0	15	13.5	24.75	4.5	18.5	4	1
0.75	1.25	0.25	0.75	0.25	23.75	10	9.25	3.5	18.5	3	0.25
1.75	2	0	0.25	0	25.5	9.25	11.75	4.75	19	3.5	0.5
0	1	0.5	0.5	0	18.5	6.75	12.25	5.75	17.5	3	0
1	3.5	0.25	1.5	0	35.25	15.25	12.25	13.5	19.75	8.75	1.25
3.25	3	1	0	0	27	8.5	20	12.75	23.75	4.25	0
2.5	2.75	1.5	0.75	0.25	38.5	14.75	18.75	8.5	22.75	4.5	0.25
10.25	3.25	2	1.5	0.75	23	8.75	27.75	7.75	24	1.75	0.25
1.5	2.5	0.5	0.75	0	27	10.75	8	9.25	19.25	3	0.5
0.25	2.25	2	0.5	0	22.75	11.75	18.25	3.5	15.25	2.5	0.25
1.25	2.5	1.5	0.75	0.25	21.25	9	11.5	5.25	17	1.25	0.25
1.5	2.75	1.25	2.5	0.5	26.25	13.5	10.75	8.75	26.25	3.25	1
2.25	2.25	2.25	0.75	0.25	20	12.75	7.5	5	17	1.25	0.25
0	2	2.5	0.75	0.25	13.75	17	14.75	13	14	3	0.75
1.5	2	3.5	0.75	0	14	14.75	6.75	3.5	13	2.5	0.25
0.75	2.25	1.25	1	0	12.25	9.75	3.25	4	12.25	6.5	0.25
12	6	4.75	2.75	3	20.75	21.75	16.5	13.5	27.75	6	2.75
3.75	3.5	1	2.25	0.75	39.5	14.25	9.25	14.5	29	5.5	1.75
1.75	2	1.25	0.5	0	18	8	10	5.25	22.75	2.25	1
1	1	2.5	0.25	0.25	23.25	13	14.5	5	11.5	2	0.25
0.25	2	2.75	2.25	0	12	15.5	13.25	7.75	20	3.75	0
0.25	1.5	1.5	0.25	0	12.25	17.25	9.25	5.25	12.25	2.25	0
0.5	1.25	2	0.75	0.25	16	20.25	8.25	11.5	19.25	6.5	0.5
0.25	1	4.5	2.5	0	14.75	18.5	3.5	5.75	11.5	4.75	0.25
1	1.75	1	1.25	0	10.5	13	6.5	3.5	13.25	2.5	0.25
0.75	2	2	0.5	0.25	14.5	18	12.5	13.5	16	1.5	0
2	2.25	4	1.25	0.75	14.75	15.25	9	4.5	20.25	2	0.5
0	3.25	1.25	1.75	0	15.25	30.75	13.75	13.5	18.25	9.75	0
2.75	1.75	5	1.5	0.5	17.5	32.25	18.75	14.5	15.5	1.25	0.25
1	2	5.75	1.25	0.25	16.25	15	6	8	7.25	3.75	1
1.25	1	1.25	1.25	0.25	11.5	16.25	6.75	5	18.25	6.75	1
0	2.75	1.5	2	0.25	11.25	31.25	3.75	9	12	7	0.25
2	2.75	4.75	3	0.5	12.25	19	8.25	10.75	12.5	4.25	1.5
1.25	2.25	4	2.25	0.5	15.5	20.5	9.25	18	9.25	1.25	0.5
1.25	2	7.25	1.75	0.25	12.25	22	11.5	7.5	12.75	3.25	0.25
1	2.25	1	1.5	0.25	23.25	25.75	10.75	6.75	19.75	5.5	0.5
1.75	2.25	2.5	1.25	0.75	18	16.25	7.25	5.25	14.25	3.75	0.75
0.5	2.25	2.75	1.5	0.25	7.75	9	15.75	2	12.5	0.25	0
1	1.75	3	2.5	0	15.5	24.5	3.25	7	18.75	2.25	0.5
0.75	0.5	1.75	1.25	0	10.75	18.75	8.5	9.75	11.75	3.75	0.25
0.25	2.75	3.25	2.75	0.25	15.75	28.25	12.75	12.75	18.75	4.25	0
1.5	2	6	2.75	0	13.25	21	15.75	13.5	15.25	1.75	0.75
0.5	2.5	3.25	1	0	8.75	26	5.5	5.25	13.75	6	0.75
1.75	2	7.75	1.75	0	13.25	15	11	9.5	17.75	4.25	0.5
1.75	1.5	6.25	1.5	0.25	15	25.75	5.25	10.5	17.25	3.5	1
0.5	1	1.5	1.5	0	9.5	15.75	3.25	4.75	11	4	0.25
3	1.75	5	0.75	0	18.25	10.25	19.75	4.5	16.75	5.75	0.75
0	1.25	1.75	0.75	0	11.75	14.5	7	11.75	16	6.25	0.25
0.25	1.75	1.75	1.25	0	15.5	13	3.75	9.5	9.25	8	0
0.5	0.5	1.5	0.5	0	12	10.5	4	3.5	21.5	4.25	0
1	2	2.25	2	0	20	30	8.25	17	26.25	13	0.5
0.5	2.25	2.75	1.5	0	9.25	17.25	6	12.75	15	1	0.75
0.5	1.5	5.75	1.25	0.25	4.5	17	6.5	6.75	16	1	0
1.25	2.75	3.75	1.25	0	14.25	26	8	7.25	18.75	1.25	0.5
1	2	4	3	0.75	14.75	22.25	22.5	13	17.75	2.5	0.75
0.5	1.75	2.25	1.25	0	13.25	23	14.25	5.5	14.25	0.5	0.75
1	4.5	6	1.25	0	13.25	31.75	15.5	9.25	24.75	7	1.75
0.5	2.5	2	2.25	0	10.5	30.25	5.25	13.5	14.75	4.5	0.75
3.25	2.5	6.75	1.75	0	7	27.25	6.25	10	14.25	2.25	1.5
2.75	1.75	3	2	0.25	10	10.25	10.75	7	11.75	4	1.25
0.25	3	1.25	1.25	0	14.75	22.5	8	12	20.5	3.25	0.5
1.5	0.75	2.25	1.75	0	8.5	17.75	4.75	6.25	5.75	0.5	0.5
1	3	0.75	1	0.25	10.75	23	6	9	15.25	8	0.5
0.25	1	3.25	1.25	0	9.75	8.25	7.5	7.25	12.5	2.25	0.75
0.75	1.75	2.75	1.75	0.25	14	24.25	8.5	12.25	18.75	3	0.75
1.75	2.25	6.5	1	0	8.25	8.5	14.25	6	13	3.75	0.5
0	1.25	2.75	1	0	12.75	9	8.5	11	12.5	1.75	0
1	3.5	3.5	3	0	12.75	16.25	5.25	20	12.75	2.25	0.5
0.25	2.25	2.5	0.75	0	10.5	18.5	4.5	9.5	14.75	1	0
0.25	0.75	1.5	1	0.25	14.5	26	8.25	10.75	16.25	9	0.75
1.5	2.25	3.5	2	0.25	18.75	32.5	15.5	15.5	17	4.5	0.75
1.25	2	4	2	0.5	14	24.5	3.75	13.5	13.5	2.5	1
1	2.75	6.25	1.25	0	8	17.5	10.5	5.5	19.75	0.5	0.25
1.25	1.75	3.5	1.75	0.25	9.75	21.25	5	6.25	12	5.5	1
1.75	1.5	3.25	1	0.5	7.75	9.5	8	11	7.5	2.5	0.25
1.25	3.25	1.75	1.5	0.5	18.75	25.25	11.25	15.25	18.5	9.25	0.5
0.25	1	2.25	0.5	0	7	10.25	2.5	3.5	11.75	2.5	0.25
0.75	2.5	1.5	1	0.5	10.5	17	5.5	8.25	16.5	1.75	0.75
0.5	1.25	3.75	0.75	0	14	18.25	8	5.5	17	5.5	0.25
0.75	0.75	2.5	0.75	0	10	20.25	8.75	6.5	14.25	2.5	0.25
1.25	0.75	2.75	1.5	0.5	14.5	29.25	11.5	10.5	19.25	5.25	0.25
1	2.75	1.75	1.25	0	12.75	17.5	2	8.75	11	1.25	0
1.75	3	5.25	2	0	16	25	13.25	16.5	17	2	1
3.25	3.5	5.5	3.5	1	18.5	33.5	7.5	7.25	12.75	2.25	1.75
1.75	1.25	4	1.75	1.25	8.25	20.75	9.25	8	15.5	2	1.5
0.5	1.25	2	0.5	0.25	4.75	18.75	10.25	6.75	12.5	0.5	1.25
1.75	3	7	2	0.25	14.75	27.25	14	11.25	28.75	3.25	1.25
1	2.5	1.25	1.5	0	7.5	20.25	6.5	8	17.5	5.75	0.25
1	1	3.75	0.75	0	6.5	7	3.5	5.5	11.25	3	0.5
0.5	1	2.25	0.25	0	9.75	11.25	5.5	5.25	8.75	3.25	0.5
0.75	1	3.5	0	0	7.5	16	4.5	8.25	15.75	6.75	0.5
1.25	1.25	3.5	0.5	0	9.5	22.75	11.25	11.75	16.25	2	0.25
0.75	1.5	4.5	1	0	13.5	21	6	10.25	10	1.5	0
1	3	1.5	0.5	0	11	20.5	8.75	11.25	23.25	4.25	0
0.75	2.25	5	2	0.25	12.25	20	13.5	7.25	16.5	3.25	0.5
1	2.5	5	1.75	0	21	17.75	4.75	12.75	18.25	3	0.5
2.75	2.25	6.25	2.5	0.25	12.5	28.75	6.5	7.5	18	5.5	0.75
2	3	2.75	2	0	7.5	33.75	5.5	3.25	14.5	1.75	1.75
3.25	4.25	7.25	4.5	1	19.25	27.5	12.25	19.25	20.75	5.5	2
1	3	4.75	1.25	0	10.5	23.5	3.75	6.5	10.75	1.5	1.25
3.5	3.5	9.5	3.75	0.75	15.5	31.75	10.75	11.5	16	2.25	1
0.5	1.5	2.75	2	0	11.25	29.75	9	8.75	16.25	2.5	1.5
2	1.5	4.25	2.5	0	9.25	24	8.25	10.5	19	3.75	1
1.25	2.25	6.5	1.75	0	6	18	8.25	4.75	9.75	2.25	2.25
1.75	1.75	4.5	1.5	0.25	12.75	15.5	9.25	7	11.5	1.5	1.5
2.75	1.5	0.75	1.25	0.25	24.5	9.75	10.75	5.25	22.25	8.75	0
1.5	2.25	0.75	1.5	0.25	18	9.5	11.5	8.5	20.5	6.25	0.25
0.75	0.75	1.75	1	0	17	9.5	4.5	3	22.75	1.25	0
0.5	2	2.25	1.25	0	12	20.5	6	11.5	13.25	4.25	0
0.75	2	1.75	0.75	0	26.5	20.5	7.5	14.5	15.75	4.25	0
0	1.5	3	1	0	8.75	9.5	2.5	12.75	11.25	2.5	0
0.5	2	2	0.75	0	12	26.5	3	7.5	17.75	15.25	0
0.5	2	3.25	2.5	0.5	7.25	22.25	7.25	7.75	16.25	2.5	0.75
0	1.25	2	1	0	6	12.25	3	7.75	8.75	2	0
1	1	4	0.5	0.25	13.25	7.25	12	6.75	9.5	2	0.25
0.5	2.75	2.5	1.5	0	17.25	19	20.75	8	14.5	1.25	0.25
1	2	5.25	1	0.25	16	24	13.25	9.25	16.75	1.25	0.25
0.75	3.25	3.25	1.75	0	16.5	22.25	16	9.25	21.5	7.5	0.5
0.75	2.25	1.75	0.75	0	16.25	30	13.75	9.25	17.25	3	0.5
1.25	2.25	4.5	2	0.25	10.75	26.25	6.5	9.25	15.5	1.5	2
0.5	1.75	2.25	2	0.5	9.75	26	6	7	12.25	3.25	0
0.25	1	3	1	0.5	10.25	31	7.75	14.25	19	6.75	0.5
2.25	2.5	5.5	1.75	0.25	9.25	19	9.25	5.75	21.5	2.5	1
0	1.75	3.25	2	0	6	20	6.5	4	14	2.25	0
0.75	1.25	2.25	0.75	0.25	9	12.5	12.75	6	12.75	1.25	0.5
0.25	1.5	1.25	1.25	0	5.75	13.75	4.5	7.5	10.25	2	0.25
0.75	1	2	0	0	8.75	26	5	10	11.5	6	0
1.25	2.25	4.5	1.5	0	11.5	7.75	4.75	6.5	23	3	0.75
1	3	3.75	1.25	0.25	11.25	26.75	9.5	16.25	15	0.5	0.5
1.25	1.25	2	1.5	0.75	10	25	6	9.25	13.25	1.75	1
1	2	4	1.5	0.25	19.5	21.25	9.75	16.75	13	1.75	1.5
1	1.75	5.5	2.75	0.25	12.75	33.25	6.25	9.75	13.75	8.5	1
3.25	2.5	4.75	0.5	0.75	10.25	18.75	2.5	7	11	1.25	1.75
3.25	2.5	6.25	2.75	0.5	12.25	29.25	8.5	10.75	16.25	3.5	1.25
2	2.5	5.75	1.5	0	6.25	22	11.5	16.5	12.25	1.25	1
1.25	1.75	4.5	0.75	0.5	8.5	21.5	10.25	3.5	14.25	6.25	1
0.75	2	3.25	2.25	0.25	11.25	33.5	8	12.75	14.75	6	0.5
0.75	1	4.5	0.75	0.25	7	18.5	6	7.25	11.5	1.5	1.5
1.75	1.75	4.25	2.25	0	7.5	29	7.25	3.25	10.25	2.25	1.25
1.25	0.75	4	1.5	0	6.75	22.5	3.75	2.25	9.25	2.5	0.75
0.75	2.25	3	1	0	7	16.75	3.75	4.25	11	4	0.25
1.25	1.5	2	1.5	1	9.25	30	9.25	9.75	16	9.5	0.25
0	1.5	0.75	1.25	0	9.25	22.75	2.75	9.25	16.5	4.5	0.5
0.5	1.75	1.75	0	0.25	4	18	5	2	13	1.25	0.25
1.75	1.5	5	0.75	0	10	19.25	10.75	17	24.25	1	1.25
0.5	0.75	1.25	1.25	0	10.25	22	3	6.75	9	0.5	0.75
1.75	1.25	0.25	1.25	0	18.25	13	5.25	5.75	14.25	2.75	0
0.25	1.75	0.75	0.75	0	31.75	10.75	9.25	2.75	14	4.75	0.25
0.25	1.25	0.5	0	0	13.5	5.25	1.25	2	9.75	0.75	0.25
1.75	3	0.5	1.5	1	21	18	4	9.75	12.25	3.5	0.5
0.25	1.5	1.75	0	0	18.25	15.75	7.25	7.75	12	1.75	0.5
1.75	3	4	1	0.25	17.5	26	16.5	10.5	14.25	1	0.5
1	2.75	1.5	1.25	0.25	9.25	23	9.75	10.25	15.25	7.25	0
0.25	1.25	3.25	1.25	0	9.25	20	7.5	5.75	12.25	1.25	0.25
1	1.75	3	2	0	6.25	20.5	4	6	8.25	1.75	0.75
0.75	1.5	3.25	2.25	0	12	13.75	8.25	7.75	13.75	4.5	0.5
0.25	1.5	1.75	1.25	0	6.75	13.75	10.5	4.75	12.5	2.75	0
1.25	3	5.5	3.25	0.25	13.5	27.25	11	11	12.25	9	0.25
2	2.25	2.5	1.25	0	10.75	22.5	6.5	21	18.25	6	0
1.25	1.5	2	1	0	10.5	16.75	7.75	8	23	1.75	1
1.5	2.25	5.5	2	0	14.25	31.5	10	15	16	2.75	2.25
2.25	3	4.75	2.5	0.25	11.75	28	11	6.5	16.5	3.75	1.75
3	2.25	5.75	2.5	0.5	14.25	22.5	7	16.75	15.25	2.5	2.75
4	4.25	10.25	4.5	2	10.5	37.75	7	9.75	8.5	5.25	3.25
1	1	1.5	1.25	0	8.75	18.25	7.25	8.25	9.25	0.5	0.25
0.25	1.25	2	1.75	0.5	15.25	25.75	4.25	5	12.5	4	0
0	1.25	1.25	0.5	0	3.25	9.5	6	5.25	15.5	0.5	0.5
0.25	2	3.25	1	0	10.25	22.25	9.75	13.25	17.75	1.75	0.25
0.75	1.25	3	1.75	0	5.75	14	3.75	9.75	16.75	1.5	0.25
0.75	2.25	2.25	1.5	0	10.75	30.5	6	9	13	8.75	0
0.5	1.5	3.25	1	0	8	17.25	11.5	6.5	14.25	0.5	0.75
0.75	1	2	0.75	0	11.25	22	4.5	9.75	12	3	1.25
0.5	0.5	2.75	1	0	11	14.5	5	6.75	9.5	3.75	0
1.75	3.25	4	2	0.25	11.75	20	8.5	9.25	15	2.5	0.75
0.25	0.75	0.25	1	0	7.25	18.75	10.5	8.5	18	1.25	0.25
2	4.25	3.25	2	0	9	20	7	8.25	15.25	2.75	1
1.25	1.5	4	2.75	0.5	9.75	33.75	5.5	6	15.25	2.5	0.75
1	3.5	1.5	1.75	0	15.75	31	11	10.75	13	5.25	0.5
2.75	4.5	8	3.25	0.25	15.75	23.75	12	10.75	18.75	4.25	3
1.25	1.5	5.25	1.75	0	8.25	24.5	5.25	9.25	9.75	2	1.5
1.5	1.75	5.25	1.75	0	9.5	17.75	9	14.5	10.75	0.75	1
2	2.5	8.25	2.25	0.5	6.75	25	12.5	9.5	11	1	0.75
0.5	1	5	1.25	0	4.5	26	4.5	3.5	15.25	4.5	0.5
1.25	2	3	1	0	5.75	14	3.75	3.75	5.25	2.75	0
5.75	2.5	3.25	2.5	2	13.5	24.25	3	9.75	16.25	10	0.5
4.25	2.5	0.75	1.25	0	19	7.25	1.5	4.5	11.75	2.5	0.25
0.5	1.5	1.25	1.25	0	16.25	7.75	17.5	3.75	15.25	4	0
3.25	2.75	1	0.5	0	27	13.25	3	4	15.25	4.75	0.75
0.5	2.25	1.25	1.25	0.25	16	16	5.5	9.75	15.75	9.75	0.75
0.75	2	1.5	1.25	0	13	22.5	15.25	9.25	13.25	2	0.5
1	1.75	3.25	2	0	15	14	7	7.75	8.25	0.5	0.5
0.5	0.75	1.5	0.5	0	9	17.5	2.5	7.5	8.5	5	0.25
0.75	2	3.25	2	0.75	8.5	12.25	6.5	5.25	18.75	1.5	0
0.75	1.5	2.25	1.75	0	12.5	27.5	11.5	8.75	14	1.75	0
0.75	1.75	3.5	1.5	0.25	19.75	21.25	14.75	13	15	1.5	0.25
0.5	2	4	1.75	0	8.25	28.5	8.75	7.25	17.25	4.75	0.25
0.5	1.25	0.25	0.75	0	7	8	5.25	5	11.25	1.75	0
1.5	1	2.25	1.75	0.25	11.75	17.25	13	11.25	14.75	1.25	0.5
0	0.75	2.5	0.25	0	8.75	15.25	3	6.25	9.75	1.75	0.75
0.25	1.5	4.5	0.75	0	6	22	6	11	12.25	0.5	0.75
0.25	2	1.75	2	0.25	12.25	23	6.5	9.75	15	11.5	0.75
1.25	2	4	0.5	0	11	22.25	7.75	5.25	14.25	1.75	0.25
0.75	2	5.75	2	0	8.75	23.5	4.25	8.5	15.75	1.5	0.5
2	0.75	6	3	0	9.75	26.25	4.5	3.5	12.75	2.25	1.5
1.75	1.5	4.25	1.75	0.75	13.25	26.5	13	14	12.75	2.25	1
3	4.5	7.25	2.25	0.25	18.5	28.75	13.5	8.75	15.75	3.5	1.5
1	1.25	1.75	2	0	11	22.5	16	8.75	13.75	4	0
1	0	2.75	0.25	0	8.25	9.5	8	7	12.75	1.75	1
0.75	1.25	1.75	0.75	0	4.75	16.5	4.75	6.75	8.75	6.5	0.25
0.75	1	1.75	1.25	0	4.5	13.25	2.75	17.75	12.5	1.75	0
1	0.75	5	1.75	0	10.75	20.25	7.25	6.25	16.25	2.75	1
1	1.25	1	2.25	0	8.25	17.5	6.25	3.5	16.5	1	0
1.25	1.5	4.75	0.75	0.5	9.75	40.5	6.75	9	14.5	5.5	0.25
0.5	3.5	6.25	1.75	0	12.5	29.5	9.75	13.25	19.5	2.5	0.25
3.25	2.25	8	2	0.5	8.75	22.5	9.25	13.75	12.5	0.75	1
1	3.25	8.25	0.75	0	12.75	32.5	9	9.75	17.5	4	0.75
0.25	2.25	2.75	1	0	6.75	25.5	12.75	8.5	14	2.5	0.25
0.5	1.25	2	0	0	15.5	19.75	14.25	6.5	13	1	1
0.25	1.75	1.5	1	0.25	17.25	36	2.5	7.25	11.5	1.25	1.5
0	2.5	1	0	0	8.5	46	3.25	3.75	12	0	0
1.25	2.25	1.5	0.5	0.25	14.75	52.75	5.25	6	25.75	4	0.75
1	1.25	1.25	1	0	17.5	47.25	6.25	5.5	16	2.25	1
0.5	2.5	1.25	1.75	0.25	16.25	41.5	8.25	6	19.25	2	0.5
2	2	2	1.75	0	19.25	42.25	6	9.5	26.75	3.5	1.5
0.25	2.5	2.25	1.25	0	16.25	44.25	6.25	5.5	24	1	0.75
0.75	3.75	0.5	1	0	14.75	47.25	3.25	8.5	18.5	2	0.25
2	1.5	0.25	1	0.5	16.25	42.25	4	5.5	23.75	2	1
1	2	1.75	1.75	0	21.25	44	11.5	16.25	23.25	1.75	1.25
1	1.25	1	1	0.25	11.25	16.75	5.5	5	20.75	0.5	0.5
0.75	1.5	2.75	1.5	0	11	23.5	6.5	4.5	22.25	0.5	1.75
1	1.75	2	1.75	0.75	13	18.25	3.5	2.25	20.5	1.5	1.25
1.25	1.25	0.5	2.5	0	13	34.25	14.5	4.25	21.5	0.75	1.75
0.25	2.25	0.75	1.25	0	10.5	22.5	10.25	3.75	22.25	0	0.75
0	2.25	0	0.75	0	7.75	24.75	5	4.75	15	0.75	0
0.25	0.5	0.5	1.75	0.25	3.75	27.75	4.75	2	11.5	0.5	0.25
0	1.5	2.25	0.5	0	3.5	30.25	5.5	3.5	19.5	1	0
0.25	1.25	1.5	1.25	0.25	10.25	28.5	5.5	9.25	18.25	1.5	0.75
1	3.75	1.25	1.5	0	19.75	35.75	13	15	31	4	0.5
1	3.5	3.25	2.25	0	12.5	37.5	18.75	8.25	29.5	1.25	2.25
0.75	3	1.5	1	0.25	10.75	47.5	3	9.25	16	1	2
0.75	3	2.5	1.25	0	16.75	38.75	12.25	15.25	18.5	4	1.25
1.25	2.25	0.5	0.75	0	8	29	8	9	18.5	1.5	0.25
0.5	2.5	1.5	1.25	0	9	33	6.75	10.25	23	2.25	1.25
0.75	2	1	1.25	0.25	14	31.25	10	6.25	17.5	2	0.75
2.5	4.5	1.5	1.75	0.25	17	39.25	6	11.75	26.5	1.25	1.5
0.5	1.25	0.25	1	0	11.5	28.75	3.25	3.75	16.75	0	0.75
0.75	2.5	0.5	0.75	0	12	40.25	1.5	10.25	16.75	1.5	0
0.5	1	0.25	0.25	0	8	36.25	9.75	8.5	15.25	1.75	0
0.5	1.5	0.75	1	0	13.5	20	6.5	16.25	22.75	2.25	0.5
1	1	0.5	0.25	0	11.5	14.75	2.75	4	10.25	1.25	1
4.5	2.25	0.25	0.75	0	29.5	15	12.25	10.75	12.5	7.75	0.25
13.25	3.5	3.5	3	2.25	30.75	10.25	8.5	5.5	21.5	10.25	1.25
0	1.5	1	0.5	0	16	8.75	10.75	2.5	16.75	0.75	0
0	1.25	1.25	0.5	0	14.25	8.75	3.75	4.25	13.25	1.75	0.25
0.75	1.75	0.75	1.25	0	13	19.5	9.75	11	15.25	9.25	0
2	1.5	1	1.75	0	16.75	11.25	5.75	9	17.5	4	0.75
0.5	1.25	0.75	1.75	0	7.75	13	6.5	3.75	9.75	1.25	0.25
0.25	1.75	1.75	1.25	0	14	20	9.75	11.25	14.5	2.25	0.5
0.5	1.5	1.75	1.5	0.25	18	27.75	22	18	17.25	9.25	0.25
0.5	1	1.75	1.25	0	16.25	22	12.75	6.5	11	2	0
1.25	1.75	4.5	3.5	0.5	8	15.5	14.25	4.75	16	1.75	1.25
2	1.25	5	1.5	0.75	9	30.5	9.5	12	12.25	12.25	1
0.75	1	1.25	0.75	0	14.75	21.75	5.75	6.5	20	0.75	0.25
0.75	2.75	2	0.5	0	6	15.75	9	11	13.25	1.5	0.25
0.75	2	3	2.5	0.5	6.5	15.5	6.25	9.75	12.5	2.5	1
0.75	0.25	0.5	0.75	0	4.5	12.5	7.75	5.75	8.25	6	0
7.75	1.25	4.25	2.75	2.5	12.25	21.25	3.75	5	14	7.25	0.5
0.25	3.25	2.25	1.75	0	12	27.25	15.25	19	18.5	5	0
0.5	2.75	2.5	2	0.25	9.25	10.75	5	11	16.5	4	0.75
2.5	2	3.5	1.5	1	5.5	18.75	5.75	6.5	11	2	1.5
0.75	1.25	2.25	1.5	0	13.25	35	5.5	14.75	12.75	9.5	0.5
2	2	5.25	1.25	0	8.75	20.5	4.25	16	12.25	1.5	1.25
3.25	1.5	5.75	3.25	0.75	11.5	30	5.75	7.5	14	2.5	1.25
0	1.5	0.5	0.25	0	5	8.5	10	4	7	3	0
2.25	1.25	0.75	0.75	0	11	13	3.25	11	16.25	4	0
1.5	1.5	0.75	1.25	0.25	17.25	7.5	1.5	5	15.25	5.25	0.5
0.25	1.25	1.75	0.5	0	13.5	7	1.75	3.25	7	1.75	0
0.75	2	3	0.5	0	10.75	12.75	3	10.75	14.25	2	0.25
0.75	0.25	1.25	0	0	7	13.5	6.25	5.5	8.5	4.25	0.25
0.75	1.75	2.5	1.75	0	8	26.5	3.25	4.5	21.25	4	0.25
0.75	1.5	5	1.5	0	16.75	26.25	7.25	17.5	14.25	2.75	0
1.25	2.25	5	1	0	23.5	21.5	9.5	12.5	17	0.75	0.25
2	1.75	6	2.5	0.75	7	18	7.75	6.5	10.75	0.75	1
0.5	1	1.5	0.75	0	11	17.75	5.75	6	8.5	2.25	0.25
2.75	2.25	4.25	2	0	10.75	14.5	18	5	18.75	1	0.75
1.5	2.25	4	2.25	0.25	7	24	8	4.25	13.25	1.75	0.25
1	1.75	2	1	0.25	11.25	14.75	8.5	10	11.25	1.25	0.5
0.25	0.75	3.5	1.25	0	5.25	17.5	11	11	11.5	1.5	0.25
1	1	2.75	2	0.5	8	38.75	2.5	9.5	14.75	7	0.5
0.75	1.25	3.5	1.25	0	8.5	10.75	4.5	5	8.75	3.25	0.75
1	1	1.5	1.75	0.25	8.5	18.25	5	7	11.75	10.75	0.5
0.25	0.5	1.75	0.25	0	3.5	9	11.25	4.5	13.5	1.5	0.25
0.75	1.25	3	1.75	0.25	16.75	18	9	10	12.75	3	1
0.75	1.25	1.75	0.75	0	6.25	18.75	22.25	4.5	13.75	0	0.75
1.25	1.5	5.25	2	0	5.25	23.75	4.25	2	16	1.25	1.5
1.25	2	1.5	2	0.25	15.5	23.25	6.25	15.5	19.5	3.5	1
2.25	3.25	4.75	2.75	0.25	13.75	36.25	9.5	10.25	16.25	5.25	1
1.25	1	2.5	2.25	0	10.25	25.25	4.5	11.25	15	1.25	1.5
1.5	1.5	8.5	1	0.75	10.75	19.75	8.75	6	15.5	1.75	1
1.5	1.75	2.5	2.25	0	5	8.25	10.25	5	6.5	1.25	0.5
0	1.25	2.25	1.25	0	10.75	25.5	4.75	11.5	12.25	4.75	0
0.75	0.75	1.5	0.75	0.25	4.25	14	13.5	7.75	19.5	2.5	0
0.5	1.25	3.5	0.75	0	9	10.5	7.5	8.5	14.5	3	0
0.25	1.5	3.75	1.5	0.5	13	15.25	6.75	7.5	10	1	0.5
0.25	1	2.75	0.75	0	5.75	13.75	5.75	6	16.25	6.5	0
0.25	1.75	3.25	1.75	0.25	7.25	12	11.25	5.75	13.75	2.25	0.5
1.5	1.25	3.25	2.25	0	7.75	20.5	5.25	11	17.25	2.75	1.25
0.75	2.75	0.75	1.75	0	12	31.75	6.5	11.75	11.5	3.5	0
2.25	2.75	5.25	2	0.5	9.25	19.5	5.75	15	13.5	1	1.75
0.75	1.5	6.25	1.75	0	20.25	17.75	11.5	11	12	2.25	0.25
0.5	1.5	1.75	0.75	0	5.5	8.75	5.75	5.25	11.25	2	0.25
0.5	1.5	2.5	1.25	0.25	10	28.25	4.75	10.25	14.25	8.25	0.5
0	0.75	2	2	0	13.25	28.25	12	8.5	20	1.5	1.25
0.5	3	5	2.25	0.25	11.5	25.5	6.5	8.5	14	6.5	1
1.75	1.75	4	2	0.5	13.25	20.5	7.75	13.75	18.75	2	2
1	2.5	2	2.25	0	6.75	23.25	4.5	2.5	10.5	1.5	0.25
1.75	3	4.75	4	0	4.5	25	7.75	8.75	16.75	3.25	1
0.75	2	2.75	0.75	0	12.75	30.75	13.25	12.25	13.5	3.75	0.25
3.25	2.5	7.25	3.75	0.5	13.25	26	4.25	6	8.5	1	1.5
1.25	1.75	4	2.25	0.25	5.75	22	12.25	3.5	8.5	3.5	0.75
0.75	1.75	4.5	0.75	0	16	24.75	13	10.25	13.75	3.5	1
0.5	0.25	2.25	0.75	0.25	7.25	18	3.75	12.75	15.5	3.5	0.25
0	1.25	1.75	0.75	0.25	6	16.75	3.25	9	12.25	3.75	0.25
0.5	0.75	4.25	1.5	0	9.75	13.75	5.75	8.25	10	1.75	0.5
0	2	1.5	1	0	13.5	25.25	6.25	11.5	17.5	7.25	0.5
0.5	1.5	2	0.25	0	7.25	12.25	6.25	4	13.75	1.5	0
0.25	2.75	3.5	1.25	0	7.75	15.75	2.5	12	14	1	0
1	1.5	2	1	0.25	12.5	18.5	4	6.5	11.25	1.5	0
0.75	1.5	3	2.5	0	12	25	7.5	13.75	17	7	0.5
0.25	1	3.25	1.5	0	16.5	22	8.5	9.75	11.5	1.25	0.5
3	3	5.5	1.75	0	12.5	33	6.25	7	14	2.5	1.75
0.75	0.75	2.75	2.25	0.25	15	25.5	11.75	13.5	18	3	0.75
2	2.5	4.5	1.75	0	20.5	28.5	11.75	11.75	18.5	3	1.25
2.5	3.5	5.25	3	0	7.25	23	11.75	4.25	9.5	2	1
0.75	1.75	6	1.25	0.25	4	14.25	11.5	7	15.75	1.5	0.75
2.75	3.75	8	2.75	0.75	10.25	25.75	6	12.25	12	3.25	3.25
0.5	1.75	2.75	1.5	0	8.5	28.25	4.75	3.75	16.75	6	0.75
0.25	0.25	3	0.5	0	8.25	29.5	9	9.75	14.25	2.75	0.5
0.5	2.5	5	1.75	0	13.75	26.75	8.5	9.25	12.5	1.75	0.5
1.75	2.5	5.75	3	0.25	15	27.75	12.5	15.25	18.5	2.75	1
1	1.25	2.5	1.5	0.25	7	21.5	8.25	2.75	7.75	3	0.75
0	1.5	2	0.75	0	3.75	8.5	5.25	3.5	7.25	0.75	0.5
0.25	0.75	1.5	2.75	0	8.75	18.5	4	9	14.25	4.25	0.5
6	1.5	4.25	2.5	2	7.25	15.75	8	10	9.75	5	1.5
0.5	2	1.75	1.25	0	15.25	12	6.25	9.75	14.75	1.75	1.25
1	1	3.25	1.25	0.25	9	19	4.5	2.25	10	1	0.25
0.25	1.75	0.5	1	0	8.25	20.75	3.5	7.5	13.5	2.25	0
0.75	3.5	6	2.5	0.25	10.25	32.5	8.5	13.75	18.5	7	0.5
1	0.5	4.25	0.5	0	6.25	21.25	5.75	4.75	12.5	1.5	1
3	2	6.5	3.5	0.75	13.75	32.25	9.25	5.75	12.75	2.5	1.5
2	2.25	6.25	1.25	0	14.25	38	8.5	11.5	20	4.5	1.5
1	3.25	5.25	1.75	0	11	19	8	12.5	15.25	2.25	0.5
0.75	1.25	4	2	0	13.25	25.25	4.5	10.5	17.25	0.75	0.25
0.25	2.25	3.5	1	0	8	27.75	5.5	8	20.25	3.5	0.25
0.75	1.75	5.5	0.5	0.25	5	16.5	5.75	3	10	0.75	0.5
0.5	2	3.75	2.75	0	11	48.75	7	15.5	18.5	4.25	0.75
1	1	2.75	0.75	0.25	5.75	17.5	16.75	5.75	17.75	5	0.5
1.25	1.5	4.75	1	0	9.25	17.25	12.75	3.25	10.5	1.5	0.75
1.25	1.5	3.75	0.5	0	14	13	7.75	6.75	15.5	3.75	0.5
2.5	1	1	0.25	0	8.75	5.75	1.25	3	13.75	3	0.5
0.75	1	0.25	0	0	7.75	6.75	1.75	9	16.25	1.5	0.25
0.25	1.75	0.75	0.75	0	6.25	11	3	3.75	8.5	5.75	0
0.5	2	1.5	1.5	0.25	7	21	5	10.25	17.25	12.25	0.75
0.25	1.25	1.75	1.25	0	10.25	16	5.5	10.5	10.5	0.5	0
1.25	1.25	1.75	1.75	0	15.5	17.25	4	6.75	10	1.5	0
0	1.75	1.5	1.25	0	16	32.5	10.25	9	15	2.75	0.5
0.5	2.5	3	0.75	0	7	21.25	4.5	10	15.25	1	0.5
0.25	1.75	3	0.5	0	8	25.25	6	5.25	11.5	3	0.75
0.75	2	4.25	1.75	0	6.5	22.25	5.5	6	13.5	2.25	1
0.75	1.75	3	1.25	0	8.5	21.5	8.5	8	17.75	6	0.5
0.75	1.25	2.25	2	0	9.75	12.5	7.25	16	9.5	2.75	0
0.25	1	3	1	0.25	5	17.25	3.25	6.5	8.25	1.5	0
0	1	2	1.75	0	11.25	21	6.5	9.25	10.5	3.25	0
0.75	1	4.5	2	0.25	13.75	15.75	6.75	10.25	11.25	2.5	0.5
0	1.25	5	2	0.5	9.5	13.75	7	6.5	10.75	1.25	0.5
0.5	3.25	1.5	2	0	8	25	6.75	5.75	14	5	0.75
1	2.5	4.25	2.25	0.25	10	28	2.75	5.75	11.5	1.5	1
2	2.75	4.5	0.25	0	11	20.75	9.75	13.5	14.75	2	1
0	0.75	1.5	0.25	0	5.25	13	5.25	5	7.5	0.75	0
0.5	0.5	2.5	0	0	11	7.5	2.5	8.75	11.75	1.75	0
0.75	3.25	1.75	1.75	0.5	6	15.75	10.75	8.75	14.75	1.75	0
0	1.75	1.75	1	0	9.25	11.75	14.5	4.5	9	1.5	0.75
0.5	0.25	2.5	1.5	0	6.25	21	10.75	10	14.25	7	0
0.25	1.25	3.25	0.25	0	9.5	18.25	3.75	5.75	13.5	3.5	0.5
0.5	4.25	2	2.25	0.25	20.5	17.5	9.5	8.5	15.75	1	0.75
0.75	2.75	3.5	1.5	0	10.75	33.25	5.75	6.75	13.75	9	0.5
1.75	1.5	7.5	2.25	0	11.25	26.5	8.25	9.5	12	1.25	0.75
0.75	0.5	4.25	1	0	12.5	16.75	7	8.5	14.25	1.5	0.25
0.5	1.25	1.75	1.5	0	5.25	16	3.5	6.25	7	1	0
0.25	1	3.25	0.5	0	5.25	13.25	5	3.75	10.25	2.75	0.25
0.25	1.75	2.5	0.75	0	6.75	9.25	9.5	5.5	12	0	0.5
1.25	1.5	3.5	0.75	0.25	6.5	15	8.5	4.25	11.75	0.75	0.75
0.75	1	1.5	1	0	8	18.25	6.75	4.25	16.5	2.5	0.25
0.25	2	4.5	1.25	0.25	11.5	22	5.25	6.75	15.5	4.25	0.25
0.75	1.25	1.5	0.5	0	5	8.25	2.5	7.5	10	1.5	0.25
0.25	2	2.25	1.75	0	6	21.75	5.75	7.25	9.25	3.25	0
0.25	0.25	3	1.5	0.25	5	15.75	6	2.75	11.25	2.5	0.5
0.5	2	2	1.25	0	19.75	19	4.5	8	13.25	3.25	0.25
0.75	0.75	2.5	1.25	0	7.5	14.5	4.75	5.25	8.75	1.5	0.5
0	1.5	0.75	1	0	7	17	8	6.75	11.75	5.5	0.5
0	1.25	1.25	1.25	0.25	11	17.25	5.5	10.75	12.75	2.5	0.25
1	1.5	2	1.25	0	10	27.75	5.5	10.5	20.75	5	0.25
0.25	1.25	2	0.75	0	5.25	16	5.5	4	12.25	0.5	0
0.5	2	1.5	2	0	7.25	24.75	12.25	7	15	7.25	0.25
0.5	1.25	4.25	1	0	7.25	15.25	6.5	10.25	7.75	0.75	0.25
0.5	1	2.75	0.25	0	12.25	8.75	6	2.75	11.75	3.5	0.25
7	3.25	0.75	0.75	0.5	41	11.5	6.25	9.75	32	5.75	1
19.5	3.75	1.5	2	1.25	50.25	13.5	20.25	14.75	31.5	8	0.75
5.5	1.5	1.5	0.5	0.25	19.5	5	6	6	18.75	5	0.25
0.75	0.75	1	0	0.5	12.25	12.5	5	3.5	12.75	2.75	0
0.5	1.25	2	1	0	11.25	18	12.25	3.5	15	2.75	0.25
0.25	1.25	2.5	0.25	0	16.75	12.25	18	2.75	20.5	1	0.25
0	1.5	5	0.5	0	16.5	20.5	10.5	4.5	11	1	0.25
1	1.25	2.75	1	0	10	21.5	4.75	2.75	21.75	5.75	0.25
0.5	1.75	3.25	0.75	0	13.5	36.75	12.75	8.75	10.75	3.75	0.75
0.75	1.75	1.75	1.25	0.5	7.75	17.5	7.5	1.5	7.5	2	0.75
1.25	1.25	2.25	0.75	0	18	24	6	12.5	14.5	3	0.25
0	1.25	1.75	1	0	8.25	15.5	1.75	2.25	15.25	1.25	0.75
0.5	0.5	5.5	1	0.25	12.5	37.75	4.5	14	18.25	3.5	0.5
0.25	0.75	3	1.75	0	5.75	13	4.25	5	11	1.5	0
2.75	2	5.25	4	0.5	10.75	19.5	10.5	3.25	15	1.5	1.25
1	2	3.75	1.75	0.25	18.25	21.5	3.25	9.75	16.25	2	0
1.75	1.25	3.25	2	0	8.75	22.5	3	2	15	0.75	1.25
3	2.5	8.75	1.5	0.25	16.75	22.25	13.25	11.25	15.5	2.75	1.75
0	1.5	2	1.25	0	9.5	29.25	3.5	11.25	14.75	8.5	0.75
0.75	1.5	2.25	0.25	0	5.25	16.75	8	4.25	13	5	0.25
1.25	0.75	5.5	2.75	0.25	13.75	33.5	3.25	8.5	16.5	1.75	1.75
4	4	5.25	2	0.5	17.25	34	14	15	14.25	1.75	1.5
1.75	2.5	4.75	2.25	0	7	26.75	4.5	8	8	1.5	0.25
1	1.5	4	2	0.25	9.25	26.25	4.5	2.75	13.25	1.25	0.5
2.5	3.5	3.5	3	0.5	9.25	19.5	6.25	4	12.5	1	1.75
0.5	1.25	0.5	0.25	0	7.5	34.75	6.25	16	20	11.75	0.25
2	1.25	1.5	1	0	17	27.25	5.25	5.5	13.5	2	0.75
0.25	0.25	1.25	0.25	0	7.25	16.5	2.5	1	10.25	1.25	0.25
0.25	2.25	2.25	1.75	0	11	35.75	2.5	4.75	14	1	1.5
1	2.25	2.25	1	0	13.25	33.5	5.75	23.75	29.75	1	0.75
1.25	2.25	1.5	1	0	13	39.25	3.5	7.5	17	0.75	0.75
0.5	1.25	2.5	1.25	0	26.25	61.25	3.75	7.75	23.75	2.75	0.75
1.25	2.25	0.25	1.5	0	24.5	46.75	3.25	10	19.5	1.5	0.5
0.5	1.25	0.5	0	0	15.75	19.75	10.75	4.75	28	0.75	1.25
1.25	3.25	1.25	0.25	0.25	29.75	41	13.25	8.25	28.75	0.75	3.25
0.25	1	0.25	0.5	0	15.25	24	12.25	4.5	21	1	1.75
1.75	4	0.75	0.75	0.25	13.25	32.75	6.5	5	21	1.75	1.25
1.25	3	0.75	0.75	0.25	18.25	37.75	5.75	10	24	2.5	2.75
0.25	1.25	1.25	1.25	0	9	30.5	8.25	3.5	20.5	1	0.5
0.75	1.5	1	0.75	0	7.75	29.25	5.75	2.75	19.5	1.25	2
1	1.25	1.25	1.5	0	12.25	44.25	18.5	7.5	18.75	0.75	2.5
1.5	2	1.25	1	0.25	24.25	36.5	14.25	14.75	21	4	3
2	2.25	1.75	0.75	0	11.25	44	13.25	12.75	18	3	1.75
2	1.25	0.75	0.25	0	19	13.5	5	6.5	17	3	0.5
17.5	2	3.25	2	0.75	35.25	16.25	16.75	7.25	19.75	10.75	1
7	1.5	1.75	0.75	0.25	21.75	12.25	9.75	5.25	14.5	4.75	0.5
0.25	0.75	1.5	0.25	0	14	13.75	10	2.25	13.5	3	0.5
1.25	1.75	1.25	0.5	0	17.5	12.75	4.75	4.75	14.75	2.5	0
0.75	3.25	1.5	0.75	0	10	34.75	10.5	11.5	14.25	13.5	0
0.25	0.5	0.5	0.5	0	10.25	16.75	6.25	7.5	12.75	1.75	0.25
1	0.5	2	0.25	0.5	6.25	17.25	7	5.5	10.75	1.5	0.25
1.5	2.25	3	1.75	0	13.25	41.5	6.25	4.25	7.75	0.75	0.25
0.75	1.5	3.75	0.25	0.25	13.25	22.5	6	13.25	21.25	1	0.5
0.75	1	4.5	1.75	0.25	11.75	21.5	3.75	4.25	9.25	1.25	1.25
0.25	1.5	1.5	1.25	0.25	7.25	6	5.25	4.25	6.5	1.5	0.75
0.5	0.25	1.25	0.5	0	22.5	11.75	11.75	7	15.75	2.75	0.5
0.25	2.25	2.5	1.25	0	12.75	31.25	9.5	11	16.25	11.5	0
0.5	1.25	2.5	0.25	0	4.25	10.75	20.75	2.75	9.5	0.75	0
3	0.5	1.5	1	0	17.25	10.25	2.5	5.75	8.25	4	0.25
0.75	0.75	1.75	0.5	0	16.75	15	3.25	10.5	12.25	1	0
1	2.75	2.75	2	0	15.75	28.5	6.5	8.25	17.75	1.75	0
1.75	2.25	4.25	2.5	0.75	8.5	18.5	6.75	5.5	18.5	5.75	1
1	1	4.5	1.75	0	7.75	30.75	11.75	10.75	14.75	6	0.5
0.75	1.75	4	1.25	0	20.75	17	9.75	11.75	8.5	1.25	0.75
1.25	2.25	4.75	2.25	0	9.75	19.75	6.25	5.5	12.25	1.75	0.75
1	1.5	2	1	0.25	12.75	26.25	17.25	11.5	14.5	3	0.75
1	1	1.5	1	0	7.25	12.75	7.25	4.75	13.25	3.5	0.5
0.5	0.75	2	1.5	0.25	7.25	20	8	3	13.5	0.5	0
1.5	1.5	1.5	1.5	0.25	12.5	36	9.75	12.25	17.5	8.25	0.5
0.25	1	3.75	1	0	2.75	22	6	5.75	12.5	3.5	1.5
1	2	2.5	0.5	0	5.5	14.25	13.5	4.5	14	0.25	1
0.75	1.25	2.25	2	0	5	20	15.75	10.75	13.5	3	0.25
1.25	1.5	1.25	2.75	0	3.75	19.25	4.25	4.75	11	1.25	0.5
1.25	2.5	4.5	0.75	0	13	22.75	10.5	11.75	16	2.25	1.5
1.75	2	4.75	0.75	0.25	8.75	34.75	4.5	9.25	16.25	2.5	1.25
2.75	2.5	6	2.5	0.25	9.75	36	6.75	10.25	12.5	4.5	0.75
1.5	2.25	1.25	0.5	0	5.75	19.25	5.75	7.25	11.5	0.75	0.25
0.75	0.75	2	0.75	0.25	4	18.75	6.5	2.5	10	1	1.25
0.75	1	1.5	0.25	0	4.75	22	2.75	2	8.75	0.5	0.75
0.25	0.75	1.25	0.25	0	13.25	6.5	5.5	3	8.5	0.75	0
3.5	1.25	1.5	0.75	0.5	15.5	14.25	2.25	1.25	14.75	6.25	0.25
8.25	1.75	1.75	2.5	2.75	12.5	13.5	5.25	6.25	14.75	4.75	0
0.25	1	1	0.25	0	10.25	11.5	7.75	3.75	15.5	0.5	0
1.25	1.25	1.25	0.5	0	15.25	11.25	7.75	5.5	16.25	6	0.5
0	2	1	1.25	0	18.25	27.25	6	15.75	18	11.5	0.25
0.75	0.5	1	1.5	0	9.5	17.75	3.25	4.75	9	2.25	0.25
1.75	1.75	3.5	1.5	0.75	7.75	23	4.5	9.25	15.5	2.5	0.75
0.25	1.25	3	2.25	0.25	6.5	23	15	10.75	16.5	5.25	0
1	0.5	2.5	1	0	9.25	15.75	6.75	10.75	11.75	3	0.5
1.25	1.25	4	1.25	0	8.25	17.25	5.25	17	12.5	1	0.25
1	1.75	5	2	0	15.5	25	8	7.25	13	1.75	1
0.25	1.5	2	1.5	0	5.25	19.25	5.75	3.5	11	1.25	1
1.25	1.5	2	1.25	0.25	17.25	36	9	8.5	14.75	4.75	0.5
1	1.25	5.75	1.25	0	10.25	27.5	13	6.25	19.25	2	0.5
0.75	1	4	1	0	4.75	15.75	6.25	4	10.5	2.5	1.25
1	1.25	2.25	0.5	0	9.75	21.25	4.75	3.5	11	0.5	0
0	0.5	1.25	2	0.25	7.75	13	4	5	12.5	1.25	0.75
0.75	2.25	4.5	2	0.25	8	33.25	4.5	8	17	8.5	1.25
1.5	0.5	3.25	1	0.25	6.75	27	9.5	5.5	13.5	2.75	0.75
0.5	1.25	2.75	1.5	0	11.25	33	6	12.25	16.5	1.75	0.5
1.25	1.75	5.5	2	0	11	29.25	5.25	11.25	18.5	2.25	0.25
0.75	1.75	4	2.25	0	5.25	24.25	3	2.75	11.5	2	0.5
1.5	0.5	2.25	1.75	0	15	22.5	5.25	11.75	16.5	0.75	0
3.5	2.5	7.5	0.75	0.5	11.5	31.25	5.25	17.25	8.25	1.5	2.25
0.25	1.25	0.25	0.25	0	6.25	31.5	4.75	3.75	12.5	5.75	0.5
0.25	0.75	3.25	0.5	0	11	22.75	1.5	6.75	14	0.75	0.25
0.5	0.5	1.25	0.75	0	9	33.5	1.75	4.25	9.75	1.5	0.5
1	1.25	2.5	1.25	0.25	9	41.75	4.25	11	17.5	1.5	0.5
1	1.5	1.75	0.75	0.5	14.5	46.5	3.25	8.25	17.25	1.5	1.75
0.75	2.25	2	1	0	17.75	47.75	2.75	3	14.75	1.5	1.25
1.5	1.25	0.25	1	0	11	34.25	2.5	6.5	13.5	1	0.5
1.5	1.5	1	1	1	9.5	42.75	4.5	14	21.5	5.25	1
1	1	1	0.75	0	7.75	38	6.5	8.75	19.5	6.5	1
0.5	2.5	1.75	0.5	0	18	36.25	4.25	7.5	12.25	3.25	0.75
1.25	2	1.25	1	0.25	18	47	4.25	5	15.75	0.5	1.5
1	1.5	1	1	0	10.75	47.5	2.5	10	19	1	0.25
0.75	2.5	0.25	1.5	0	12	39	2.25	17.75	23.5	2.5	1
1	1.25	1.75	2.5	0	12.5	29	6.75	17.5	26	4.25	2
0.75	2.75	1.25	0.75	0	8.75	28	3.75	8	21.75	1.25	0.75
0.5	0.5	0.75	0.5	0	8.75	27.75	6.75	5.75	13.5	3	0.25
3.25	1	0.5	0.25	0	34.5	15	13	8.25	17.75	8.5	1.25
4.5	2.25	1	1	0.25	22.5	10.25	6.5	7.25	16.25	4	0
0.75	0.25	0.75	0.5	0	14	12.25	2.5	1	11	1	0
1.25	1.25	1.25	0	0	13.75	24.5	8.75	8.5	12.25	12.75	0
1	1.25	0.75	0	0.25	13.5	22.75	10.5	5.25	13.5	6.5	0.5
1	0.75	2.75	1	0	8.25	14.25	9.5	5.75	7.75	1	0.75
1.25	2.5	3	2	0	13.25	26.75	20.5	11.5	23.25	2.75	1
0.25	1	0.75	1.5	0	9.5	19.75	3.5	5	8.5	1	0.5
1.5	1.25	3.5	1.75	0.5	9.5	13.25	10	13.25	11.25	2.75	0.75
0.5	1	2.5	0.5	0	11.5	18	9.25	18	7.5	1.25	0.25
7.25	1.25	3.5	2.75	4	8.75	23.75	3.75	10	11.75	4.5	1
0.75	1	1.5	0.25	0.25	7.25	19.5	4.75	14	13	5.5	0
0	0.25	1	1	0	5.75	14.25	18.75	2.25	12.5	2.25	0
2.5	2	6	1.75	0	10	21.25	7	6.5	9	1.25	0.5
0.5	0.5	1	1	0	5.75	16.25	2.75	2.75	9.5	1.75	0
1.25	2	5.25	2.5	0.75	8.75	38.5	5.25	19.25	18	2.75	1.5
0.25	0.75	3	0.75	0	8	9.5	6.75	6.25	9	4.25	0.5
0.75	0.25	2.5	2.5	0	5.75	12.25	4.25	8.5	7.75	1.25	0.5
0.75	1	2	0.5	0	12	13.25	10.25	8	13.5	1.5	0.75
1	0.75	0.5	1.5	0.25	4.75	10	1.25	7.75	16.25	2.75	0.5
0.75	2.25	4	1.75	0	12	26.25	2.75	10.75	16.75	13.5	0.5
1	1	1.5	1	0	10.25	15	9.5	8.75	9.5	1.5	0.25
2	2	4	1	0	12.75	23	5.25	10.5	17	0.75	0.75
0.25	1	1.5	0.25	0	6.75	12.5	1.75	4.75	7.75	2.25	0.25
1.5	1	1.5	0.75	0	13.5	15.25	13	9	9.25	6	0.25
0.25	1.5	1.5	1.5	0	20.75	20.5	12.5	13	18.25	3.5	0.25
0.5	1	1.5	1.75	0	11.5	18	3.5	5.25	10.75	2	0.25
0.75	0.75	2.75	0	0	15.5	18.75	8.25	5.25	14.25	3	0.5
2	1.25	3.25	2.25	0.25	9.75	25.25	9.5	8.5	9.75	3.75	0.5
0.75	1	1.75	1.25	0.25	5	20	4.75	6.5	12.75	1.5	0.5
1.75	1.5	2.5	1.25	0	11	31.5	5.25	5.5	19.75	9	1.5
1	0.5	5.75	0.75	0	11.25	22.5	6	14.5	11.5	0.75	0
1.75	2.25	4.75	2.75	0.25	17.25	26.75	7.75	8.5	14.25	1.75	1.75
0.25	0.5	3	0.5	0	4.75	13.25	5.25	6.75	7	4.75	0
0.5	0.25	0.75	1.5	0	5	11.25	6.25	5.25	11.75	6.75	0
0.25	0.5	0.75	1	0	8.25	12.5	6.75	7	7	1	0
0.5	1	2	0	0	7.75	19.5	2.75	8.25	11	3	0
0.5	1.25	1	0.5	0	9.75	16.75	4	13.5	15.75	4.75	0.25
1.25	1.5	0	0.25	0	17	35	16.75	16.5	15.25	3.75	0
1	0.25	1.5	0.75	0	9	12.5	9.25	8	13	2.25	0.25
0.75	0.5	2.25	1.25	0	9.5	19.75	4.75	8.25	11	0.75	0.25
2	0.25	4.5	1	0	8	18	6.5	6	13.25	4	0.25
1.5	1	3	1	0	10.5	15.25	5	8	11	2.25	0
0.25	0.75	2.25	1.75	0	13.25	6.25	5	4.5	7.75	3.25	0.25
0.75	0.5	1.75	0.75	0	6	14.5	5	7.75	11.5	1.25	0.75
0.5	1.5	2	1	0	5.5	15.75	7	8.75	11.5	2	0.5
1	1	2.25	0.75	0	9.5	26	3.5	10.5	13.5	1	0.75
0.25	0.5	1.5	1	0	13	18.25	4.25	13.5	14.75	3.5	0.25
0.75	1.25	5.5	0.75	0	4.75	22.25	4.75	5	13.25	1.75	1
2	0.5	5	1.5	0	8	27.75	15	2.75	9.75	0.5	0.25
1.75	1	0.75	1.75	0.25	10.75	23.5	8.75	9.25	20.25	5.5	0.5
0.75	1.5	3.5	0.75	0	10	18.5	10	10.25	9.75	1.5	1.25
0.25	0	1	1	0	5	14.25	2.75	3	10	7	0.25
1	1.5	1.75	1.5	0.25	11.5	13.75	2.75	9.75	15	1	0.25
0.75	2	4	1	0	14.75	8.25	8.75	8.5	13	2.75	0.25
0.25	1	2	0.75	0.25	7	16.75	4	8	12	3	0.5
0.5	1	2	0.5	0	5.75	21	5.25	8.25	10	5.25	0.5
0.75	1	2	0.25	0	9.25	13.75	16	7.5	14.25	4.75	0.25
0.75	1	3.5	0.75	0	13.75	25.25	8.5	8.25	14	1.75	1
0.5	1.25	2.75	1.75	0.25	11.5	28.75	8.5	6.75	13	4	0.5
2.25	2.25	4.5	1.25	0	10.5	36.25	9.5	16.75	17.25	3	0.75
0.75	0.75	2.5	0.75	0	3.75	15.5	3.75	2.25	8	2	1.25
0.5	1.25	2	0.5	0	3.25	14.25	2.5	7.5	10.25	1.5	0.5
1.25	1.25	5.25	1	0	11.25	22	11.5	7.5	6.75	2.5	0.75
0.5	0.75	1.5	2	0	8.25	22.25	8	5.25	14.25	2.25	0.5
2.75	3.75	4	2.5	0.25	9	25.25	7.5	12	18.5	2.5	1.5
1	1.25	2	1	0	7.25	23	6	7.5	14.25	1	0.5
2	1.25	5.5	1	0	7.25	32	7	9.5	12	5.5	1
2.75	3.25	7.5	2.25	0.5	8.25	30.5	4.5	13	12.25	3	2.25
1.75	2.5	6	2	0.25	6.25	22.5	2.25	2.75	7.5	1.25	0.75
1.5	2.5	5.25	2.75	0	20.5	30.25	8.5	20	21.5	3.25	1.5
2	1.25	4.5	2.25	0.5	9.5	34.5	6	7.5	15.5	2	2.25
1.25	0.75	3	0.75	0	7.25	22.5	6	6.75	11.25	2.25	0.75
0.75	0.5	3.5	0.5	0	4.75	31.75	3	4.25	11	2	0.75
1.75	0.5	3.25	0.5	0.25	12	26	6	4.5	11	1	1.5
0.25	1.25	0.25	1.25	0	8.75	38	3.25	3.5	8.25	0.5	0.25
0.5	1.25	1.75	0.75	0	6.25	38.75	1	3.75	12.75	1.75	1
0.75	1.25	2.25	0.25	0	13.25	42.75	2.5	8.5	20	3	2
1.25	0.75	2.75	0.5	0.25	5.75	17.25	5.5	7.25	15	0.25	0.5
0.25	1.25	0	0.75	0	11.25	12.5	5.75	1	5.5	1.25	0
1.25	2	0.75	0.75	0.25	24.25	15	4	5.25	16.5	6	0.75
2	1.75	0.25	0.25	0	18.5	5.75	5.5	4.75	12.25	1.5	0
1.5	1	0.5	1	0	15	7.5	2.25	3.75	13.5	2.25	0.5
0.5	2	1	0.25	0	12.75	14	2.25	6	11.75	1.75	0.25
0.5	0.5	0.75	1	0	9.5	17.5	6.75	7	11	3.75	0.25
0	0.75	2	1.75	0	15.5	37.5	16	20	16	11.5	0.25
0.5	0.75	2.25	0.75	0	5.75	10.5	21.25	7.25	14.5	1	1
10.25	3	4.25	5	5.75	11.5	31.5	5	16.75	12.75	6.75	1.75
1.5	1.5	4.25	1.75	0	10.75	25.25	9.75	5.75	11.75	1.75	0
0.25	0.5	4.75	1.25	0	5	19.75	7.75	5.25	11.5	3	0.5
0.75	0.5	0.75	1.5	0	6.5	11	3.5	10	9	2.25	0.75
1	0.75	1.75	1	0	12.5	21.75	5.25	8	8.75	5	0.25
1.25	1.5	0.5	1	0.25	7.5	25.5	6.5	9	16.5	12.5	0.25
1.75	1.5	2.75	2.25	0.25	7	17.5	8	3.75	13.75	1.25	0.75
1.25	1	4.25	2.5	0.25	17.25	31.75	4.5	18.5	21.75	2.25	0.75
0.75	1.5	3	2.25	0.25	11.5	23	9.75	8	13.5	3	0
1.75	0.75	5	1.75	0.25	6.75	15.75	5.25	11.25	15	1	0.5
1	0.5	1.75	0.5	0	5.75	14.75	5	3	6.75	1	0
1	1.5	2.25	1.5	0	8	27.25	7	12.75	9.5	7.25	0
1.25	1.25	3	1.5	0.25	7.5	25.75	3.5	6.5	12	6.25	0.75
0.75	1	0.75	2	0	10.25	27.25	2	7.25	11.25	1.75	0.25
2.25	1.5	8	1.5	0	19	25	10.75	15.75	11.5	2.75	1
2.5	1.75	4.25	1.5	0.5	10.5	29.5	7.75	7.5	11.5	1.75	0.5
0	2.5	2.5	1	0	2.5	13	11.25	4.25	11.25	0.5	0.25
1.75	1.75	3.75	2	0.5	5.5	25	10.5	6.75	13	3.25	0.25
2	1.5	7.25	2.5	0.25	7	14	5.75	5.75	13	2.25	1.25
0.5	0	1	1	0.25	16	19.25	5.75	9	10.5	1.25	0.5
0.75	1.5	2.5	2	0.5	7.25	32	11.25	12.5	13.25	7.75	0.5
0.25	0.5	2.25	1	0	5.25	17.25	2	3.25	5.75	0.75	0
2.5	0.75	0.75	0.25	0	9.25	12.5	1	5	12	3.5	0.25
2.75	0.75	0.5	0.75	0.25	14	12.25	2.25	6.5	10.25	5	1
7.75	1.25	2.75	1.5	1.75	14	10.25	2.5	3.25	3.75	4.25	0
0	1	1.25	0.5	0	9	8.75	2	9	9.25	0.25	0
1.5	1	1.25	1	0	17.5	12	5.75	15.5	11.5	1.25	0.5
0.75	1.5	1.25	1	0	11	25.5	12	8.5	11.25	7.25	0
1.75	1.75	4.75	1.25	0	8	23.75	7.5	6.25	19.75	1	0.25
0.75	1.25	1	1	0	8.25	25	4.5	7	9.75	12	0.75
0.25	2	3.25	1.5	0	9.25	12	2.5	11.25	7.75	0.5	0.25
1.5	0.5	1	1.75	0.25	11.5	15.75	8.25	5.5	13	0.75	0.25
1	1.25	3.25	0.75	0	6	20.75	5.75	3.25	12	0.25	0.25
0.25	0.75	0.25	1.25	0	12.75	23.75	3.75	7.5	12.75	2	0.5
2.5	2.5	7.25	1.5	0	7.75	25.25	13	11.5	17.25	3.25	2.25
1.25	1.25	4.75	1.5	0	8.75	22.5	10.25	15.5	13	3	0.75
1	1.5	4.25	1.25	0	6.75	30.75	6.5	6	10.75	4.5	0.25
1.75	1.75	4	2	0.5	9.5	25	4.25	2.75	8.75	2	1.75
1	0.5	2	2	0	13.75	20	12	9.75	9.5	6	0.25
1	1	3	0.5	0.25	4.75	12.75	4	6.5	11.5	3	0.25
1	1	3.5	1.75	0.25	8.25	14.25	4.75	5.25	9.25	3	0.75
0.75	1.25	1.25	1.25	0.25	14.75	25	11.5	9	14.75	3.75	0.5
0.75	1.25	3	1	0.25	4.75	13.5	3	8.25	9.5	1.75	0.75
0	0.75	1.5	0.5	0	5.25	11	4.5	6.25	6	1.75	0
1.25	1.5	2.25	1.75	0.25	7.75	23.25	3.75	8.75	13.25	0.75	0.25
0.75	1.5	1.75	1.5	0	7.25	18.75	3.75	3.75	13.75	1	0
1	1.25	2.75	1.25	0	7.5	21.5	12	7.25	12	4.25	0.25
1.75	2	4.5	0.5	0	6.5	25.5	6.5	2.5	6.5	0.25	2
0.75	2	4.25	2	0.25	7.75	23.75	4	7.25	12	5.25	1.5
1.5	0.25	1	0.5	0	5.5	18	4.5	6.25	7.75	7.5	0
0.75	1	0.75	0.25	0	9	9.5	2.5	9.75	11.75	2	0
7.25	1.5	5.5	1.75	2.25	7.75	18.75	6	7.5	8.5	2.25	0.75
0.25	2.5	1.25	0.75	0	8.25	13.25	8	5.25	8.5	3.25	0.5
0.25	0.75	1.25	0.25	0	8.25	25.75	5.25	10	9.25	10.75	0
0.5	0.75	1.5	1	0	9.5	19.75	8.75	12.25	14	3.5	0.25
0.75	1.75	3	1.25	0	12.5	22.25	7.5	8.5	12.5	0.25	0.75
1.25	2.25	2.5	1.5	0.25	8	24	1.75	2.25	14.5	1.75	0.25
1.5	0.75	5.25	1.25	0.25	3.75	7.25	3.5	4.25	7.25	1.25	0.75
0.25	1.75	0.75	1.75	0	6.5	14.25	12.25	4.25	8.75	2.75	0
1.5	2	3.75	1.25	0	21.25	21.75	8.5	14.5	14.25	1.75	0
0.5	0.75	5.25	1.75	0	7.75	19.5	4.25	9.75	8.5	1.25	1.25
1.25	1.5	3.5	1.5	0	13	16.75	4.75	12.25	11	1.75	1.5
0.75	1.25	3.5	1.5	0	7	30.5	4.75	6.25	12	5	1
2	1	8	1.5	0	14.25	30.75	7.75	16	13.25	2.5	0.75
1.5	2.25	3.75	1.5	0.25	9.5	29.5	6.25	10.5	11	2.25	0.5
1.5	1.75	7.5	2	0	7.25	24.5	5.5	1.75	9.25	0.75	1
0.75	1.25	1.25	1	0	9.25	44.25	6.75	15.75	15.25	7.5	0.25
1	0.75	1.75	0.5	0	5.75	35	6	7	16.75	2.75	0.25
0.5	1.75	5	2.25	0	4.75	25.5	4.5	3.5	8.75	0.5	0
0.25	1.5	2.5	1	0.25	4.25	17	17.75	2.75	16.75	0.25	0.5
1	1.75	1.5	0.25	0	3.25	26.25	11	0.5	7.25	1.25	0.25
2.5	2	1.25	1.75	0	7.5	28.75	18.5	1	16.5	1	0
1.75	4.25	1	1.5	0.5	11.5	34.25	9.5	6	18.25	2.25	2.75
4	1.75	0.75	1.25	0	9.5	44.25	5.75	13.25	16.5	1.75	0.5
4.25	0.75	1.5	1	0.5	12.75	48	14.25	17.25	18.25	4.5	2.25
0.75	0.5	0.25	1.5	0	6.75	20.5	15	4.5	17	0.75	0.75
0.75	1.75	1.75	0.5	0	15.75	43	5.25	11.75	16.75	1.75	1.75
2.25	2.25	1.5	1	0.25	10.75	33.25	4.25	12.25	17.75	1.25	2
2	3.25	1	2	0	17.25	36.75	5.25	17.5	18	2.75	2
1.75	1	1.5	1	0.25	8.5	45	6	9.25	20	1.25	1.25
0.75	2	1	1.25	0.25	8	24.5	2	4.25	13.5	0.5	1.75
1.25	1	1.5	0.5	0	8.75	31.25	2.25	2.5	12.75	0.75	0.5
0.5	0.5	0.75	1	0	13.5	24.75	1.5	7.5	13.25	3	1.5
8.5	1.25	1.5	1	1.75	35.5	16.25	24.5	11.25	15.25	7	0.75
15.25	0.25	2.25	1	1	21.75	20.5	16.75	7.5	23.75	4.25	0.5
1.5	1	0.5	0	0	12.25	11	5.5	3.25	8.5	0.75	0.25
0.75	1	1	0	0	9.5	18.25	3.5	5.75	10	1.25	0.75
0.5	1	1.5	1	0	19.5	11.5	16.25	13.25	8.75	0.5	0
0.5	2.25	0.75	0.5	0	18	19	5.25	13.25	14.25	0.75	0.25
0.75	1.75	1	0.25	0	12.25	14	10.25	6.5	6.75	0.5	0.25
0.5	0.75	1.75	0.5	0	7.75	12.25	6	11.75	9.5	1	0.5
0.25	2	1.75	1.75	0.25	5	10	6.75	3	3.75	2	0
8	1.5	1.5	0	0.25	25	9.25	11.75	8	18.25	4	0.75
11.75	1	2.25	2.25	1.75	17.25	12.75	11.25	4	10.75	3.5	0.5
1.5	0.75	0.75	0.25	0	16	14	11.5	3.5	13.75	1.5	0.25
1.75	1	1.5	0.5	0	13	17	12.25	6.75	14.25	1.75	0.25
0.25	0.5	1	0.25	0	5.5	24.25	11.5	10	10.25	5.25	0
2	1.75	1.25	1	0	18.75	10.5	12	5.25	10.25	2.75	0.25
18	1.25	2.25	0.5	1.25	21	14.5	7.75	5.25	12.25	2.75	0.75
0.25	0.25	1	0.25	0	15.75	10.5	6	3.25	11	2.75	0.25
0.25	0.25	1.5	0.25	0	15	23.25	4.25	10	14.25	9	0.5
1.25	2.25	5	0.5	0	9.75	28.75	3.25	12.25	11.75	2.5	0
2.5	2	4.75	1	0.25	17.5	38.5	14.25	19.75	17.75	4.75	0.75
0.75	0.75	1.25	0.75	0	8.75	11.75	2.75	5.75	8.25	2	0.25
1.5	1.25	0.75	0.5	0	8	11.5	5.5	14.5	7.5	1.5	0.5
1	2.5	1.75	1.25	0	12.25	17.75	15.25	11.75	10	0.5	0.75
0.25	0.25	3	1.25	0	4.5	19.25	12	3.75	6.75	6.75	0.25
2	1.25	3	1.25	0	10.25	24.75	4.5	6.75	12	6.25	0
2.25	1.5	2.5	0.75	0	20.25	11.5	7.5	4.75	13.5	3.75	0.25
10.25	1.5	1.25	1.25	0.25	22.25	9.5	32.5	5	24.75	3	0.75
1.5	0.75	0.75	0.25	0	15.75	12.5	3	2.75	12.25	1.75	0.25
1.5	0.75	3	0.75	0	11	24	5.75	6	17.75	2.75	0.25
19.25	2.5	4.25	3.75	5.25	17.25	15.25	11.75	9.25	20.25	8.25	1.25
10.5	1.25	0.25	0	0.75	21	5.25	20.75	4.5	14.75	3.25	1.25
7.25	2.5	2	1.25	0.5	28	14.25	27.25	17.75	25.5	7.75	1
2.25	2.5	0.75	0.5	0	23.5	5.75	33.25	3.5	24.75	2	2
1.75	2	1.25	0.75	0	21.5	8.5	20.5	8.5	27.75	2	1.75
7	1.25	0.75	0.75	0.75	10.25	6.5	30.25	6.5	11.25	2	1.5
5.25	1.75	1.25	1.5	0.5	12.25	7.5	17.5	3.5	14	3.25	0.5
1.5	1.75	0.25	0.5	0	11.75	6.25	12	3	15.25	2.75	0.5
7	2.5	0.5	0.25	0.5	25.25	11	15	7.5	12.5	4.75	1
47.75	3	5.5	3	7.25	36.5	17.25	21.75	21.75	18.75	12.5	1.75
10.5	2.25	1	1.25	0.5	45	15.5	19	27.5	23	7.5	0.75
30	1.75	2.25	3.5	3	29.5	10.75	18.75	20	18.75	6.25	0.75
5.25	1.75	0.75	1.5	0	31.75	6.5	7.5	12.5	13.25	2.75	0.75
7.75	1.75	1.25	0.75	1	18	7.25	15.75	9.75	14.25	3.25	1.25
8.5	1	2.5	1	0.5	27.75	10	15.25	12.25	17.75	3.5	1.5
10.25	1	1.5	0.75	0.5	27.25	9.5	16.5	20.75	20.5	5.5	1.75
5.75	1.25	2.25	0.5	0.25	22.5	9.75	8.25	14.5	14.75	2	1
8	0.75	3.5	0.75	0.25	27.5	9.25	16.75	4.75	9.75	4.25	1.5
5	0.75	2	0.75	0.25	20.25	9.25	10.25	11.5	15.5	3.25	0.75
10.5	1.5	0.25	0.5	0.75	18.75	11	13	17	13.75	3.75	0.75
4.25	0.75	1	0.25	0.25	26	6.5	11	7.75	15	3.75	0.75
0.5	1.5	1.25	1	0	18.25	11.25	10.25	5.75	11.75	2	0.25
2.25	0.75	2	0.25	0.25	25	15.25	7.25	6.5	16.25	5.25	1.25
9	1.5	2	3	1	35.5	14.25	9.75	5.5	20.5	3.75	1
6.25	1.75	2.25	0.25	0.25	26.75	11.75	12.5	3	15.5	3.25	2
8.75	2.75	0.75	0.5	0.5	40.5	20.75	17.25	6.75	22.5	5.5	2.25
0.5	1.5	1	0.5	0	24.5	9	13.75	11	12.25	3.75	0.5
0.5	2	0.25	0.75	0	21.25	8	10.25	6	7.5	2.75	0.25
7.25	3	3.75	1.75	0.25	54.25	16.25	13.5	17.75	28.75	5	3.5
57	3.25	17.25	9.75	18.25	27.5	16.5	5	13.25	6.5	19	2.75
65.5	6	27.75	15	20.25	29.25	34.5	7.5	17.75	11	33	3
67	6	28.5	13.75	20.75	22.5	28.25	7	20	8.25	31.75	2.5
51	5	19.25	12	16.25	26	23.5	15.5	17	14.25	22.25	1.75
50.5	3.5	20.25	9.75	15	20.25	26.5	8.75	14.75	7.25	22	1.25
47	5.75	15	9.25	16.5	22.5	21.25	2.75	10.25	10	17.75	1.5
27	4.5	7.5	2	7	16.25	13.25	5.75	5.75	13	9.75	1.25
65	3.25	23.75	12.25	24.5	19.25	35.25	8.75	17.25	8.25	27.25	2.5
46.5	3.5	14	9.75	12.5	18.75	26	6.25	13.25	17.75	21.5	2
58.25	4.25	23.25	12.5	20.25	23.25	28.75	4	19	13.75	32	2.25
42.25	4.5	13.75	7.75	11.75	35.5	21	3.75	14.75	18.75	21.25	2.5
28.5	6.5	8	6.5	13	80.25	24.5	27.75	26.25	37.25	16.25	2
21.25	3.5	3.25	3.25	3.75	70.25	19.25	6.5	17.75	22.75	8	2.5
49	4.25	11.75	10.25	15.5	18	17.25	3.5	13	9.5	21.5	1.5
47	4.5	18.5	10.5	16	20.75	23.25	3	14.25	15.75	24.5	2.5
62.75	7	27	15	24.25	29.25	39	6	24.75	18	34.25	3.25
85	10.75	37	21.75	37.5	79	42.75	24.25	47	31	50	4.5
67.25	7	22.75	12.75	21.5	56.25	40	17.5	38.5	31	34.25	3.5
31.75	4	9.25	7	9.25	42	17.5	10.5	27.5	27.25	12.25	3
39.25	3.25	15.5	8	17.5	18	13.25	2.5	14.25	8.5	17.5	2.75
40.75	3.25	11.75	4.5	15	20.75	13.25	4	11.75	16.75	15.25	1
41.5	3.5	8.25	4.25	14.25	16.25	13.5	3.5	10.25	11.5	11	1.75
55.5	4	20.75	13.25	23	18.75	21.75	4.25	18.25	12.5	26	5
37.75	4.5	12.75	5	15.5	14.25	20.5	6.5	12	15.5	17.5	2
57.75	4.25	19	10.75	20	19.5	29	5.5	19.5	16.5	24	2.25
56.75	5	18.25	12.25	24	21	24.25	4.5	19.75	19	22.75	0.75
38.25	4	11.5	7	15.25	17.25	20.5	7	13.5	19.5	17	1.25
9.25	0.5	1.25	0.75	2.25	14.5	9.25	6.25	4.25	23	3.5	0.5
2.5	1.75	0.5	1.25	0.25	12.25	9.5	6.5	5.25	20.25	2.5	0.75
5.75	1.5	0.75	0.25	0.5	20.25	11.75	12.25	4.5	19.25	5	2
7.25	1.5	1.25	1.25	0.5	21.25	5.25	27	12	20	2	0.75
4.5	1.75	1	0.75	0	16.5	6.75	13.75	8	18.75	3.25	1
5.25	3.5	3.25	1.25	0.25	20.75	12.25	12	13.75	17.5	5.25	0.25
5.5	1.75	2.25	1.5	0	19.5	11.25	8.5	8	13	3.25	1.25
11	2	1.25	1.75	1.25	22.5	21	13	18.5	22.5	9	1
15.5	2.25	0.5	2	3.75	36.5	16.25	11	18.25	25.25	4	2
24.75	3.5	4.75	2.5	3.75	14.75	13.75	8.5	12.25	17	4.5	0.5
31	1.25	6.75	2.5	8.25	19.75	15.75	4.75	9.75	12.75	8.5	0.25
38.75	2.75	6.5	3.25	14.75	13.75	12.75	13.25	11.5	18.25	10	1.5
35.75	1.25	11.25	3.5	3	13.25	18.25	8.75	17.5	16.75	13.5	1
28.5	2.25	5.25	2	2.5	12.75	19	6	9.5	20.25	5.75	0.75
12	2.5	3.25	1.25	1.75	17.75	16.75	13.75	9.5	14.75	5.25	0.75
41.75	3.25	13	3	5	17.5	17.25	8.25	11.25	17.5	12.75	0.75
8.75	1	2.5	0.5	1.25	16.75	21.5	11.25	11.5	11.75	3.5	0.25
32.75	2	11.5	3	1.75	14.75	28.5	13	14	10.75	11.5	1
13	1.75	2	1.25	1.25	12.75	16	2.5	7.5	19.25	2.75	1
25.25	2.5	10.25	2	2	12.75	19.75	4.75	10	18.75	11.75	1.25
11.5	2.75	4	0.75	3	13.5	10.75	6.5	12	18.25	2	1
25.75	1.5	11.25	1.75	2.5	16.25	20.5	13.75	14.25	17.25	11.75	0.5
26.25	1.5	3.25	2.25	7	15.75	12.5	3.25	6.5	19.75	7	0
9.75	1.5	2.5	1.25	2.75	10.5	18	6	11.75	11.25	3.25	0.25
29.75	1.5	14.5	3.5	4.25	18.75	37.25	18.75	24.25	18.75	12.5	0
13	1	1.25	1.25	3.25	15.25	17.5	4.25	10	18	3.75	0.75
15.5	3.5	7.75	2	1.5	8	13.25	4.75	10	13.25	6	1.25
26.25	2.5	4.75	1.5	3.75	14.5	22	4	7.75	17.25	13	0.5
3.5	2.75	1.75	0.5	0.75	10	10.25	6	4	12	2.25	0.75
14.25	1.75	3	1	4	17.75	10	7.75	8.75	18.75	5	1.25
24.5	1	7.75	2	1.75	18	26	6.25	12.25	13	10.75	0.5
20.25	1.25	6.5	1.75	5.75	14.5	20	4.25	9	19.75	3.25	0.25
6.75	2	6.75	1	0.5	13.5	19.25	12.5	5.5	14.5	3.75	0.75
8.5	2.5	2.25	2.5	1.5	10.25	23	4.5	8	10.25	4.5	0.75
7	2.25	3	1.25	0.25	14.75	21.5	17	13	17.75	4.75	0.75
7.5	2	3.25	1.5	0.25	11.25	20	11.5	7.75	13.5	0.75	0.75
11	2.5	7	1.5	0.5	13.75	23.25	10.5	15.25	17.75	4.25	0
10.5	2.25	4.25	3	0	16.5	19	4.5	4.5	12.75	4.5	1
20.25	2.75	1.5	2.5	3.25	16.75	13.25	5.75	10.5	39.5	7.25	1
9	1.25	2	1.25	2.25	9.75	20	8.5	7.25	17.75	3.75	0.5
0.5	0.5	2	0.5	0	13	20	6.25	9	14.5	7.75	0.25
1.5	1.25	3.25	1.25	0	13	20	13.25	4	21	2.25	0.5
1.75	2	3.25	1	0	20.75	21.5	17.25	9.5	17.75	3.5	0.5
1	0.75	4.25	1.5	0	12	43	2.5	2.25	16.25	1.25	0
1.5	2.75	4.5	2.25	0	16	38.5	10.25	16.5	20	11.75	0.5
0.75	1.5	3	2	0.5	10.25	18.5	7.75	6.5	10	2	0
1	1.25	2.75	1	0.25	17.5	28.75	3.25	9.75	15.75	1	0
0.75	3.25	4.25	1.75	0.25	7.25	27.25	6	5.5	16.75	1.25	0.25
1.75	2	2	2.5	0.5	14	27.5	9.75	13	20	4.25	0.75
0.75	1.75	2.75	0.75	0	16.25	14	10.75	11.25	13	3	0
0.25	1.5	0.5	0.5	0	8.5	11.25	5.25	4	9	1.75	0
0.75	0.25	0.5	0	0	11.25	7.5	5.25	7.25	16.25	1.5	0
18	1.75	0.5	1	2	24.25	14.5	4.5	10.25	16.75	3.5	0
51.75	3	2.5	4.25	2.5	40.75	24.5	14	31.75	32.25	10.75	2.75
17.25	2.5	1.5	3.5	0	29.5	24.25	14.75	28	39	10.75	1.75
1.5	4	0.5	0.75	0	31.25	13.25	39.75	15.5	33.25	4.5	2.5
11	3	1.25	3.25	0.5	26.25	10.25	18	23.25	33.75	5.5	2
1.25	0.5	0.25	0.75	0	18.5	10	10.75	6.5	7.75	1.75	0
0.5	1	0.25	0.75	0	17	16.25	5.75	3.75	9	3.5	0.25
5.75	1.75	0.75	1	0.5	23.25	17.25	14	10.5	21.5	7.75	0.5
0.5	1.5	3	0.75	0	18.5	13.25	20.75	12.25	9.5	1.5	0.75
1	1.25	6.5	1	0.5	16.5	16.25	12.5	8.25	18	1.5	2.25
1.25	2.5	4.5	1.75	0	20	31	7	8.5	10.5	1.75	0.25
0.5	2.25	4	0.75	0.25	17.5	37	17.5	7.75	12.5	7.75	0.5
1	1.75	3	2.5	0	16.25	18	2.5	11	14.75	3.25	0.5
13.25	1.75	1.5	2	1	30	12.25	10.75	10.5	21.5	3.5	0.5
0.5	0.75	1	0.75	0	20.5	11.25	6	5.75	12.25	2.25	0.5
1	2.25	1	0.75	0	22.75	16.25	8.75	15.5	22.75	9.75	0.25
1	2	3	1	0.75	23.75	23.5	7.5	11.25	15.25	2.25	1
0.25	2.25	1.75	0.5	0	11.75	22.5	5.5	8.25	13.5	7.75	0
1.75	1.5	3.25	1	0	9.75	24.75	3.75	9.75	12.25	1.25	0.5
1.75	1	3.75	2	0.5	14	27	3.75	11.25	13.5	2.25	1
1.25	1.75	3.75	1	0.75	15	13	4	9.75	12.75	2.5	0
0.25	1	1.5	1.5	0.5	20.5	25	11.75	7	18.25	8.5	0.5
0.75	1.75	2.75	0.75	0.25	11.75	26.5	10.75	5.25	21.25	2.75	0.5
0.25	0.5	1	0.5	0	13.75	8.5	3.75	9	14.5	1.75	0
0.25	1	1.25	1.75	0	19.25	23.5	11	5.75	15.5	3.75	0.5
0.5	0.5	4.25	1.25	0	15	26	9.25	9	21.25	6.75	0
1	0.25	0.75	1.25	0	8.75	18	7.25	4.75	14.75	0.25	0.25
1.25	2	6.25	2.75	0.25	13.75	20.5	5	12.25	12.75	2.25	2
1.25	2	3	2	0	19.75	12.75	3.5	8.75	7.75	4.25	0.5
0.25	0.75	0.5	1.25	0	14	26.75	4.5	6.75	16.25	10.75	0.25
1.25	2	3	1.75	0	12.75	17.5	5.25	8.5	13	1.5	0.25
1.25	2.25	2.25	1.25	0	11.5	29.25	7.5	7.75	17.75	1.25	0.75
1.25	1.75	1.75	1.75	0.25	8.75	22.25	2.75	11.25	14.75	2	0.25
1.25	0.5	3.25	1	0	11	18.5	3.5	7.75	13.5	1	0
1	2	3.75	1.75	0.5	9.75	21.5	10.25	4.25	14.75	9.5	0.5
0.75	1.75	1.75	2.25	0	10	27.5	12.25	7.75	10.75	2	0.75
2.5	1.5	6	3.5	0	15	31.75	8.75	14.75	19.25	1.25	1
2	2	7.5	2.5	0.5	14.75	23	5.5	6.75	15.75	4	1.5
0.5	1	2	0.5	0	15.5	9.75	6	4.75	15.25	2	0.25
1.5	1.5	0.5	1	0.25	30	12.75	6	8.25	21	3	0.5
3	0.75	0.25	1	0	19.5	9.5	11.5	8.75	15.25	3.5	0.75
1	1	0.75	0.25	0	26.75	14.75	5.5	5	11.25	1.75	0
5.75	2.25	1.75	1	0.25	33.25	22.5	23.75	11.25	38.5	8	1.5
25.75	2.5	1.75	1.25	2.5	22.5	10.75	21	24	35.5	5.75	1
5	0.5	1	1.25	0.75	17	5.75	20.75	4.5	12.25	1.5	0.5
0	0.75	1	1.25	0	20	15.25	10.25	4	15	2	0
0.25	0.5	1.25	1	0	25.75	18.5	13	6.75	21	2.25	0.5
0.5	1	3	0.75	0.25	18.25	25	7.25	3.5	12.5	6	1
2.25	2.25	4	2.25	0.5	14	32.5	12	14.25	17.25	3.25	0
1.75	1	2.5	2	0	16	24	18.5	11.5	18.75	2.5	1.25
0.5	0.25	4	1.5	0.25	12.75	19.75	22.5	9	20	1	0.5
0	1.25	2.5	2.5	0.25	20	31.75	13.25	9	21.25	5.5	0.5
1	1.25	5.25	1.5	0.25	16	14.75	10	12	8.75	1.75	0.5
1.5	1	4.75	3	0.25	13.75	22.75	16.75	16.25	14	1.5	0.75
1	2.5	2	3.25	0.75	14	32.75	5.5	11.75	17.75	4	0.5
0.5	1.75	3	1.5	0.5	13.5	16.25	9.25	7	13	1	0.25
1.5	2	5.25	3.25	1	8.75	31	5.5	12.75	21.5	3.75	1
1.25	1.75	4	2.25	0.25	11.75	31.75	9	15.5	20.5	6	0.5
2.75	1.25	3.5	1.75	0.5	14.25	35.75	10.5	15.25	17	4.25	0.25
0.75	1.75	4.25	2.25	0	12	33.5	6.5	8.75	14.25	0.75	0
2	1.75	5.25	2.25	0.5	18	31	5.25	8.25	14.25	1	1
1.75	1	5	1.5	0	8.75	25.25	10	5.25	15.25	1.75	1.75
2.5	2.75	7.25	3.5	0.25	13.75	35.75	5.5	12	19.25	1.75	1
0.75	1.75	3	2.25	0	12.75	20	9.25	12	18.75	0.75	0.5
1.5	1.75	6	2.75	1	6.25	22	6.5	3.25	9	4	1.25
0	0.5	0.5	0.75	0	16.5	19.75	11	7.25	10.75	4.5	0.5
1.5	1.75	3	0.25	0	16.5	26.75	3.25	11.25	17.75	4.75	0
0.25	1.5	3	0.25	0.25	8.25	17.5	11.25	3	13.75	5.25	1.25
1	1.5	1.5	0.5	0	15	21.25	7.75	10.25	16.75	1.75	0.5
1.25	1.75	4	2.25	0.75	17.5	35.25	8.75	21	26.25	2.5	1.25
1.75	2	1.25	2.25	0.75	12.75	36.75	7	11.25	22.75	6.25	0.5
1.5	2	4.5	3	0.25	8.75	26.5	5.25	6	16.5	1.5	0.75
1.5	1.75	4	3.25	0.5	13.5	41.75	4.75	8.25	16.5	1	0.5
1	1.25	5.75	1.25	0.25	11.75	28.75	4.25	7.5	19.25	0.75	0.25
1	1	1.5	1.25	0	6.75	19.75	6.75	6.25	23.75	1.5	0.75
0.75	0.75	0.75	1	0.25	8	18.25	5.25	4.5	20.25	0.75	1.5
0.75	0	2.25	0.75	0	8	17.75	3.5	4.25	9.75	1.75	0.5
6.25	0.5	3.25	0.75	0.5	15.5	13	16.25	6.25	17.75	2.5	0.75
0.25	1	0.75	0.25	0	13.25	17.75	13.5	4.5	11	7.25	0
0.25	1.25	2	0.5	0	12.5	20.5	6.25	10	19	6	0.25
0.75	2	4	0.75	0	14.75	28.5	18.25	8.25	16.75	7.25	0.25
1.5	1.75	1.25	1.25	0.25	13.5	16.75	8	11	16.25	1.75	0.25
0	1	3	1.5	0	14	20.5	4.25	9.5	15.75	2.5	0
0	0.25	3.25	0.75	0	7.75	21.75	2	6.25	9.75	1.5	0
1.5	2	2.25	1.5	0	25.5	36.25	7	21.25	22	6.25	0
2	1.25	3.75	1	0.25	5.5	16.5	10.25	8.5	16.25	2.25	0.75
1.25	2	4.5	1.75	0	12.25	10.5	15	8.25	13.5	0.75	1
1.25	0.25	3.25	1	0	11.25	17.75	6.75	7.75	15	1.75	1
1.5	1.5	3	1	0	14.25	33	2.75	15	19.25	3.75	0.75
1.75	4.25	2.75	1	0.25	21.25	31	8.75	10	21.75	3.75	0
0.5	1.5	3.75	1.75	0	15.75	25.75	6.5	5.25	11	2.25	0.75
2.75	3	7	1.75	0	12.75	34.25	9.25	9.25	16.25	1.25	2.25
0.5	0.5	2.75	0.75	0.25	11.5	34.25	2.75	6.25	14.5	6	0.5
0.75	1.25	0.25	0.75	0.25	7.75	27	4.25	8.75	15.25	0.75	0.25
0.5	0.25	1.25	1.25	0	13	19	6	9.75	12.75	1	1.25
0.5	2.25	1.25	1.5	0	6.5	34.25	1.25	3.75	13.75	3.5	0
0.25	1	1	0	0	9.25	27.5	3	3.25	12	1.75	0.25
1	1.75	1.5	0.5	0	5.75	22.75	2.5	2.5	14.75	0.25	1
2.75	1.5	0.25	1.5	0	8.75	21.5	6	3.75	18.5	1.75	0.5
0.25	1	0.75	1	0	6.25	19.75	5.75	5	17.75	0.5	0.5
0.5	1.25	0.5	0.75	0	10.75	40.5	7	3	16.25	0.25	0.25
1	2.5	1	1	0	7	57.5	2.75	4.5	18	1.5	0.25
1.25	0.75	1	1.25	0.25	17.5	58.5	5.25	6.25	20	1.25	1.25
1.5	1.75	1.25	0.75	0	24.5	42.25	7	8	19.75	1.75	0.25
0.75	0.75	1.25	0.75	0	12.5	37.75	5.25	2.75	13	0.5	0.5
17.5	2	0.5	1.5	1	23	23.75	4.75	12.25	14.25	7	0.75
11.5	1.75	0.25	0.5	0.75	21.25	9.5	5.5	9.75	16.5	6	0.25
43.25	2.25	2.25	1.75	4.5	39.75	12.75	16.5	15.75	23	7	1
2.5	0.5	0.5	0.5	0	22.5	10.5	7.5	9.5	17.5	2	0.5
0.5	0.5	0.25	0.5	0	14.5	12	10.5	8.25	11	1	0.25
0.25	0.25	0.75	1.25	0	13	19.5	3.5	3.25	6.5	0.75	0.25
0.75	1	0.75	0.75	0	13.25	26.75	2.5	5	15.5	1.75	0
0.75	2.75	2.25	1.25	0	18	23.75	10.75	20.25	17.75	1.75	0.25
0.75	1.5	5.75	1.75	0	12.75	20	8.5	12.25	20.75	4.25	0.75
0.75	0.5	1.5	0.75	0	7.75	14.25	13.75	7.5	14.5	1.5	0
1.75	0.75	2	0.5	0	11.25	17	7	3.5	11	1.25	0.25
1.5	2.25	2.25	2	0.25	12	25.5	10.5	9.75	16	10.25	0.25
1.5	2.5	2	1.25	0.25	12.25	20.5	13.75	9.25	22.5	3.75	1
1	1.25	2.5	1.25	0	8.75	21.25	7	8.75	22.75	2.75	0.75
2.25	1.25	6.75	1.75	0.25	10.5	30.25	11.75	16.5	17.25	7	1.25
2.75	0.75	6.25	3.75	0.25	7.75	19.75	20.25	7.75	22	1.25	2.25
0.5	0.5	2.25	1.75	0.25	14.5	31.5	5	12.25	14.5	1.5	0.25
2.5	1.25	5	1.75	0.75	11.5	29.75	4.5	8.25	19.5	1.75	1
1.25	0.5	3.75	1	0.25	10.75	29.25	9.25	3	16.75	2.5	0.75
2	1.75	3.75	1.5	0.5	13.25	17.5	9.25	5.75	11.75	2.5	0.25
1	2	2.5	1.75	0	14.75	11.25	9.5	16	9.75	2	1
4.75	1.75	1	1.5	1.5	10.75	17.5	2.25	7.25	8.5	6.25	0.5
1.25	1.25	1	1.75	0	11	18.5	6.75	11.75	11.75	1	0.25
0.75	1	2	0.75	0	6	10.5	11	3.5	14	1.25	1
1.75	1.75	3.5	1.5	0	8.5	35.5	5.5	6.75	18	9.75	1.25
1	1.5	4.75	1.25	0	16.25	21.25	7.75	14.75	18.25	3.25	0.75
2.25	4.75	5.5	4.5	0	17.25	39.5	15.5	21	17.5	2.5	0.75
1	0.75	2.75	1.25	0	11.25	24	7	16.75	19	1	0.5
0.5	0.75	7.25	1.75	0	8	25.75	1	2.5	9	0.75	1.75
1.5	1.25	3.25	1.5	0	9.5	31	8.5	12	23.5	11.5	0.25
1.5	1.75	5.25	1	0	10.5	26.75	5.25	12.75	21.75	0.75	1.25
1.5	1.25	0.75	0.5	0	9.5	26.75	6.25	6.25	11.75	1.5	0.25
1.75	2	1.5	0.25	0	15	43.5	2.25	3.25	22.5	0.25	0.5
0	1.25	2.25	0.5	0	19	46.75	5.5	1.5	18.25	0.75	0.25
1	0.25	1	0.5	0	5	19	2.75	4	14	0.25	0.25
0.5	1	0.25	1.25	0	14	16.75	4	4	15.75	2.25	0.25
1	1.75	1.5	1.5	0	16	12	4	1.75	17	3.25	0.25
6.25	0.25	0	1.25	0	27.25	8.5	6.5	6.5	14.25	2.75	0
1.25	0.75	0	0.5	0	16.25	8.75	2.75	3.5	14	0	0.5
0.75	1.75	2.25	0.75	0	14.5	11	1.75	2.5	8	1	0.25
0.75	1	0.75	0.75	0	15.25	14.75	8.25	6.75	9	3.25	0
0.75	1.75	1.5	0.75	0	17.25	28.25	8.75	16.25	24.25	9.5	0.5
0.5	1.75	4	1.75	0.25	17.75	22.25	14.75	16.75	16.5	1.25	1.25
1.25	0.75	2.75	1.75	0.25	8.75	24	10.25	4.75	13	0.25	0.25
0.75	1	3	0.5	0.25	9.25	31.5	6.5	9	14.25	11.25	0.5
3	1.5	4	1.5	0.75	8.5	22	13.25	8	20	2.25	1.5
1.5	1.25	3.25	3	0	13.5	14	7	5.75	12	0.5	0.75
0.75	1	2.25	1.5	0	12.75	13.5	5.25	5.5	13.5	1.25	0.5
1	0.75	2.5	1.5	0	9.25	18.5	6	5	19.5	6.25	0.25
0.5	2.25	2.5	1.5	0.25	9.5	26.25	4.25	5.75	14.75	2	0.25
0.5	0.5	4	2.5	0.25	8.25	27.5	13.25	7.5	23.75	7.75	0.75
2	0.75	3.75	1.75	0	12.25	27.75	4	6	15.75	2.75	0.25
2.25	1	8.25	1	0	15	27	7.25	5.5	14.5	2	1
1	0.75	3.5	1.75	0.25	13	26.25	7.5	8.75	18	1.75	1
2.75	0.5	2.75	0.75	0.25	6.25	29.75	7.5	17.25	16	2.75	1
1.25	1.25	4.75	0.5	0.25	6	25	7.25	3.5	15.25	1	0.75
1.25	1.25	1.5	0.75	0	9.5	35.75	6.75	5.25	9.5	0.5	0.75
0.5	0.75	3.5	1.75	0	10.25	31.5	5	11.25	18	2	1
1.5	3.5	2.5	0.75	0	18.75	20.5	2	9.5	20	1.75	0.75
0.25	2.5	1.75	1	0	11.75	25	2	3.75	14	1.5	0.25
1.5	0.75	0.25	1	0.25	21.5	11.25	2.25	5.25	11.5	1.25	0.25
12.25	0.75	1.25	0.25	0.5	18.5	5.25	2.5	4.75	8.5	3.75	0
0.25	0.5	1	0.5	0	14	14	2.75	4.75	13.75	2.5	0
1	0.75	1.25	0	0	14	7	13	2	13.25	1.75	0.25
0.5	0.75	2.75	0.5	0	15.5	16.75	10.75	7.5	14.25	0.75	0.5
0.75	0.25	2.25	0.5	0.25	10.5	26.5	13.25	12.75	13.5	8.5	0.25
7.25	1	6.5	2.5	2.25	17.25	17.75	18	17.25	12.75	5	0.75
1.75	1.25	4	0.75	0	11	23	10.75	24.25	16.25	2.5	0.5
0.75	0.75	2.5	0.75	0	8	22.25	4.25	11.5	17.25	6.5	0
0.75	0.75	2.25	1	0.25	7	19.25	1.25	3	5.75	3.75	0.25
1.75	0.25	3.75	1.25	0	10.25	14.75	6.25	5.75	16.25	0.5	0.25
1	1.75	3.5	0.75	0.5	9.25	29	12.5	4.5	13.75	4.5	0.25
0.75	0.75	3.5	2.25	0	9	22.5	3	11.25	18.25	1.5	1.5
1	3	3.25	2.75	0.25	10.75	38	10.5	10	18.75	4.5	0.75
0.5	1.25	2	0	0	5.5	12.75	2.5	3	18.5	1	0.5
0.25	1	2	0.5	0	9.75	19	5.25	1.5	10.5	1.25	0.5
2	2	3.5	1.75	0	12.75	16.5	6.25	5.25	21	1	0.5
0.5	2	1.75	0	0	12.25	15.5	8.5	9.25	19.5	1	0.75
0.75	1	1.5	0.5	0.25	17.25	24.5	7.25	9.25	18.25	1.5	0.75
1.5	0.75	1	1.25	0	14.25	41.25	2.5	9	20.75	1.25	1.75
1.75	2.25	3	1.5	0	28.25	52.75	9.5	12	19.25	1.25	4
0	2.25	1.25	2	0	12.25	46.5	14	2.25	22.5	1.25	0.5
0.75	1.5	2	1.25	0.25	9.75	39.25	13	5.5	22.5	0.75	1
0.75	1	1.25	0.25	0	11.75	37.5	22.25	4.25	15.75	0	0.5
0.75	3.75	1	1.5	0	16.75	53.5	9	10.75	17.75	2.5	1.25
0.75	1.5	0	0.75	0	13	40.5	8.5	13.75	18.25	2.25	1
1.5	1.25	0.5	0.25	0	14.25	51	7	14	24.75	1.75	3
1.5	2.25	0.75	0.5	0	15.5	54.75	8.5	10.25	18.75	1.5	1.75
0.75	2.75	0.75	0.5	0	18.5	53.75	6.75	12.5	21.75	2	1
1.25	2.25	1	1.25	0	16	32.25	6.75	7.25	18.25	1.75	0.25
0.25	1	0.75	1	0	9.75	21	5.5	4.25	12	0.5	0.25
2.75	3.25	1.5	1	0.25	25.5	51.75	4	7.25	29	4.75	2
0.75	1	1.5	1.5	0	18.25	41.75	1.5	7.25	16.25	1.25	0.75
1.25	2	0.75	1.75	0	18	37.25	3.75	9.75	27.5	1.75	2
1	1.25	0	1.75	0	11	18.25	4.25	10.5	26	1.75	2
16	1.75	2	1.75	0.5	18.75	19	6.75	9.5	11.5	7.75	0.25
0.5	1	0	0.5	0	15.25	12.5	5.5	2.5	12.25	2.25	0
1	1.25	0.75	0.75	0	10.75	11.5	6.25	3.5	12.5	1.25	0.75
0.25	0.75	1.25	0	0	13.25	8.5	13.25	6.75	18.25	2	0.5
0.25	2	0.5	0.75	0	11.5	4.25	1.5	3.5	15.5	2	0.5
0.5	1.5	1.5	0.5	0	8	16.25	6.5	9	11	5	0.25
0.75	1.75	1.25	0.25	0	13.5	10.25	6.5	8.25	11	1.5	0.25
9	1	1.25	1	0.75	17	11	11.25	6.5	17.5	2.75	0.25
24.75	0.5	4.5	2.5	1.25	16.25	12.25	7.5	9.25	11.5	6.75	1
0.25	0.75	3.75	0.25	0	14	27.5	18	10.5	18	4.5	0.25
1.75	1.25	0.75	1	0	9.75	17.25	3.5	12	12.25	1	0.25
7.75	1	3.75	2.25	2	16.75	18.75	7.25	13.5	8.75	4.75	0.5
0.5	1.5	4.25	1	0.25	18	38.75	9	14.25	24.25	4.25	0.5
0.75	2.5	3	1.25	0	11.75	25.25	11.25	17.25	12.5	2.5	1
3.25	2	9	2.25	0	10.5	27.25	9.25	8.75	11.75	0.75	1.5
2.5	1.5	4.75	2	0.25	14.5	16.5	4.75	6	10	2.25	1.25
0.75	1	3	1	0	15.25	12.75	4.75	6.5	15.5	2.25	0.75
0.75	1	3.75	1	0	8.75	25.25	8.5	7	14.25	1.75	0.25
1	1.5	1	1	0	9.5	33	4.25	13.25	16	13.5	0.5
0.75	0.75	1.75	1.5	0.25	8.75	27	8	8.25	15.75	2.5	1.25
1	1.25	6.5	1.25	0.5	11.5	24	6	7.75	13.5	1.5	1.5
2	0.5	4.25	1.25	0	15.25	27.5	10.75	5	13.75	4.25	1.25
1.25	1.5	1.75	1	0.5	13.5	25.25	10.75	9.75	15	3.25	1
0.25	0.75	3	1	0	5.75	26	7.5	3.75	10.25	1	0.75
0.75	1.75	2.5	1	0.25	14.5	11.25	6.75	7	8	1.5	0.25
1.75	1.5	2	1	0	9.5	15.75	5.5	5.75	8.75	7.25	0
1.25	0.5	3.25	1	0	16.5	12	6.75	8	15	0.25	0.5
0.5	1.25	2.5	1	0	7.25	18.25	3.75	13.25	18.25	3.25	0.5
1.5	2.25	3.75	1.75	0	4.25	24.75	8.25	10.5	27.75	3.25	0.5
0.5	0.25	2.25	1	0	10.75	18.5	4.75	11.75	11	0.75	0.5
1	1.25	4.25	0.25	0	12.5	19.5	8.75	9.75	17	3	0.5
2.5	2.25	5	4	0.5	10.25	26.5	4.75	14.75	19	7	1.75
3.25	1.5	4.5	4	0	6.5	28.5	6	9.5	17.75	1.75	1
1.25	0	2	1	0	5	21.75	7.75	4.25	11.75	1	0.5
2.25	2	5.25	1.75	0	9.25	30.75	4.25	9.5	15.25	4.75	0.75
2.25	2.25	6.75	1.5	0	13	32.25	9	11.25	15.25	2.25	1.25
1.5	1.25	4	0.5	0	6.75	29.25	3.75	2.75	10.25	3.75	0.5
1.25	1.75	1	0.75	0	7.75	35.75	5.5	11.75	21.75	6.75	0
0.25	1	1.25	1	0	13.75	28.75	5.5	6.5	16.75	0.5	0.75
1.5	2.25	1.75	1.25	0	8.75	38	4.75	4.5	9.5	1	0.25
0.5	0.5	1.25	0.25	0	9	23	3.5	2.5	6	0.75	1
2.25	2.5	0.5	1	0	11.75	54.5	4.5	6.75	28.5	2.25	0.5
2.25	3.5	3	1.5	0	19.75	48.75	4	6.75	29.5	1.75	0.5
0.5	1.25	2	0	0.5	11.25	31.5	6.75	4.25	27.75	0.25	2
2.25	1.5	0.75	0.5	0.25	10	36	6.5	4	18.5	1	2
4.5	1	1.5	0.25	0	20	35.75	13.25	12.25	24	1.75	3.25
0.75	3	0.5	1.75	0	13.25	31.5	6.5	11.75	26.5	2.25	2.25
4	1	1	1.25	0.25	13.5	44	5.75	14.25	19.5	3	2.25
1	1.75	1.25	1.25	0.25	18.75	40.5	10.25	13.25	19.75	2	1
1.25	0.5	0.5	1.25	0	14.5	46.75	5.75	8.5	17	1.5	0.5
1.5	2.5	1.75	1.25	0.25	14.75	47.5	2.75	4	20	3	0.75
1.5	1.25	1	1.25	0	20.75	43.5	6.5	9.5	26.75	2.75	1.25
0.5	0.75	2.25	0.25	0	12.25	41.5	5.5	7.5	20.75	0.75	1.25
0.75	1.75	0.5	0.75	0.25	16.25	40.75	4.75	11.75	24.5	1.25	2.75
1.25	2.5	0.25	0.5	0	21	31.5	10.25	12.5	27.75	1.75	2.5
1.5	1.5	0.5	1.5	0	13.75	24.25	9.25	5.75	21.5	1.25	3
1.5	1.75	1	3	0	13.75	43.75	5	8.75	20	3	1
7.75	2.25	1.25	1.5	2.25	14.25	46.75	21.75	11.25	25	3.5	5
3.25	0.5	0.75	1.25	0.5	19	38.25	13.25	10	20	2	2.5
1	0.5	0.5	0.75	0	19.25	49.75	9.5	13.5	18	1.75	1.25
1	0.5	0.25	0.25	0.25	14.25	21.5	13.5	8	17	0.25	1.5
1.5	2	1.25	0.25	0	19.75	24	5	14	22	1.75	1.25
1.5	1.25	0.5	0.75	0	14.5	23.25	5.5	6.5	14.75	1	1.75
2.5	1	1	0.75	0	10.25	18.5	6.5	4.75	19	0.75	1.5
1.5	3	1.25	2	0.5	20.75	33.75	10.25	8.75	27.25	0.75	3.25
9.5	1.75	2.5	3	0.75	15	28.75	14	11	16.75	5	1.5
11.5	1.5	0.75	1.25	0.75	23.5	9.5	5.25	11.25	16.5	5.5	0.25
1	0.25	0.75	1.25	0	14.25	14.25	4.75	3.5	12	1.75	0.25
0.75	0.5	0.75	0.25	0	11.5	12.75	21	5.25	17.5	0.5	0.25
1	1.25	1.5	0.5	0.25	12.75	16.5	11	10.25	26	2.75	0.25
0.5	0.75	2	0.25	0	14.75	10	9.75	3.5	11.75	1.25	0.5
30.5	1	1	1	2.5	22	13.5	5	5.25	14.5	4.25	0.5
1.25	1.25	0	1	0	11.75	20.25	4.75	8.75	16	8.25	0.5
0.75	0.75	1	0.25	0	12.5	26.25	10.25	14	15.25	8	0
1	1	2.5	1.5	0	6.25	20	25.75	5.25	18.75	2.25	0
2	2.75	6.5	1.75	0.25	18	24	9	14	11.5	1.75	1.75
1.25	1.75	4	2	0.25	12.25	21.5	18.25	14	13.5	3	0.5
0.5	1.25	2.5	0.5	0	11	32	7.75	19.75	19.5	4.25	0.5
2.25	0.75	4.25	1.5	0	8.5	24	6.75	6.5	13.5	2.25	0.25
2.25	2	4.25	2.5	0	6.5	25.75	10.75	7.25	17.5	7	0.75
0.5	1.75	5.25	2.25	0.25	7.5	20.25	2.25	4.75	9.5	2.75	1.25
1.25	1.25	1.25	1	0	17.75	9.5	7.5	2.25	12.75	2.25	0
0.25	1.25	0.5	1	0.5	22.5	13.75	5.25	13.5	14	1.5	0
1.25	1.25	3.25	0.25	0	13.75	25.25	4.25	18.5	17.25	2.5	0
0.75	1.25	2.5	0.25	0	6.5	22	18.25	10.5	17.5	3	0.75
1.25	1	2	0.75	0.25	9.25	29.25	8.25	8.5	17.25	7.5	0.25
0.5	1	0.75	0.5	0	16	8.25	2.25	5.75	15	1.75	0.25
2.5	0.25	1.5	0.25	0	20.75	9	2.25	3.25	12	3	0.25
1	0.75	2	1	0	11.25	14.75	6	6.5	16.25	6.25	0.5
0.25	3.25	1.25	0.5	0	18	23.75	9.5	10.5	23.75	10.5	0
2	2	4.5	1.75	0.25	11.25	23	15	22.5	16.5	1.75	0.5
1	2.25	2.5	2	0	7.25	16.5	5.75	5.75	12.75	1.5	1.5
0.75	1.75	2.75	1.75	0	11.5	22.75	5.75	6.25	19.75	2	1.25
2.5	1.5	5.5	2	0.25	9	22.25	5.75	8.75	10	2.25	1
1.5	2.75	4.5	3	0.5	5.5	21.75	6.25	9	13.75	1.5	1.5
0.5	1	1.75	0.25	0	13.75	33.25	3.75	6.25	12.5	4.25	0.75
1.25	2	4.5	0.5	0	15.75	21	10.75	14	18.75	2	0.5
0.75	1.5	2.75	1.25	0	9	6.25	7.75	3.75	9.25	1.75	0.25
1.5	0	2.25	0.5	0.25	13.5	11	6.5	4.75	7.75	2.75	0.25
0.25	1.5	0.25	0.75	0	11	25	15	12	16.75	2.25	0.25
0.25	1.25	1	0.75	0	7.25	11.25	11.75	9.25	13	1.75	0
0.25	1	0.75	0.75	0	8.75	21.25	2.5	7.75	12.75	1.75	0.5
2	1.5	3.5	0.75	0	8.25	14.25	3.25	3.75	15.5	2	1
1.75	0.25	1.5	0.25	0	17.25	7.25	3.25	5.5	13.25	0.75	0.5
12	2	2	1.5	0	16.25	8	1.5	6	14.5	8.5	0.5
1	1.25	2.25	0.25	0	19.75	12.25	3	11.5	15.25	3	0
2	1.25	1.25	1.75	0	10.25	15.25	7.5	7.5	16.5	3.5	0
0.75	1	2	1	0	5.25	18	3.5	9.5	10	3	0
1	2.25	3.75	1	0	9.25	23	11.25	8.25	22.75	1	0
1	0.75	3.25	2.5	0.25	8.25	27.75	5.5	10.5	20.25	2.25	0
1.5	1	3.75	1.5	0.25	11.25	17	4.25	6.5	11.5	3.5	0.75
0.75	1.5	2.75	1.5	0.25	8.75	22.25	5.25	7	12.75	6.25	0
0.75	1.25	2.25	1.25	0	10.75	9	10.75	8.25	23.25	0.75	0.25
2.25	2.5	2.5	2	0	14.5	33	7	7.75	19	3.75	0.25
0.5	0.25	0.5	0.25	0.25	7.5	3.5	12.75	1.75	10	0.5	0
13.25	2	3.5	0.5	0	17	12	6.75	5	12.5	2.75	0.75
2.75	0.5	2	1	0	11.5	8.5	2.5	9.5	9.25	2	0.75
1.5	1.25	0.75	1.75	0.25	17.5	24	8.25	13	22.75	2	0.25
0.75	0.75	2.25	0.25	0	9	13.5	4.75	5	5.25	0.5	0.5
1	1	1.25	1	0	8.5	14.75	3.75	4.75	15	7.75	0.5
1.25	2	3.5	1.25	0	10.5	12	7.25	6.75	14.5	1.75	1
1.5	1.25	2.75	2.5	0.25	16	7.75	7.25	13	13.5	2	0.5
1	2.5	3.5	2.25	0	9	16.25	9	6	16	1	0.75
1.5	1	1.25	0.5	0	8.25	14.5	3.5	7.5	11.75	3.25	0.75
2	1.5	3.75	1.75	0.25	6.75	16.25	3	10.25	17.5	5	0.25
1.75	0.75	3	0.5	0	8.5	15.5	3.75	12	19	1.75	0.75
0.5	0.75	4.5	1.25	0	11.75	15.75	4.75	8.5	15	1.25	0.75
1.75	2.25	3.5	1.75	0.25	11.25	30.5	12.75	17.5	20.25	4.75	0.75
0	2	3.25	1.75	0	15.25	30.5	13.25	6.75	17.25	0.75	1
1.5	0.75	5.75	2	0.25	4.5	20.5	12.25	9.75	23.5	3	0.75
1.75	1	2.5	2.5	0	9.75	12.25	7.5	6.75	10.5	1.25	0.25
1.5	2	5.25	1.5	0	22	11.75	6.75	10	12.25	1.75	0.5
6.75	1.25	1.25	2.25	1	10	15.25	1.75	6.5	9	2.25	0.75
1	1.25	1.75	0.5	0.25	9.5	29.5	4.5	8.25	14.5	5.25	0.25
1.75	1	4.5	1.75	0.25	8.5	18.5	9.75	7.75	20.75	0.5	1.25
2.25	1.5	5.75	2.75	0	7.25	19	4.5	14	21.25	1.75	0.5
0.75	1	1.25	1.25	0.25	13	9.25	2.25	4	14.5	2.5	1.25
0.75	0.5	1.5	0	0	17.75	19.5	3.75	8.25	16	5.25	0.25
8.25	1.25	1	2	0.25	35.5	11.5	9	9.5	28.25	4.25	0.5
17.5	3.25	1	1.75	0.75	36.75	10	9.75	11.25	24.5	9.25	0.5
16	2.25	0.25	1.75	1.5	38.75	22	12.75	18.5	29.25	11.75	1
15	2.75	1.5	1.75	1	43.5	24.5	19.5	20.25	33.25	6.5	1
4.75	1	0.75	1	0	34	20	18.5	17.75	22.5	4	1
1.5	2	1.25	0.75	0	32	15.5	23.25	10.25	22.25	4	1
2.5	2.25	1.25	0.5	0	34	10	23.5	13.25	21.75	3.25	1
1.5	1	1.25	0.25	0	19	13	17	7.5	14.5	1.5	0.5
0.5	1	0.5	0.75	0	16.25	11.25	14	6	15.25	2.25	0.5
2.25	2	1.75	1.5	0	30.5	24	9.5	12.5	25.75	4.25	1.75
1.25	1.25	0.5	1	0	21.75	14	14.75	9.25	24	4	0.5
2	1.25	1	0.75	0	19.75	11.5	11	5	20.5	3.75	0.25
1	2	1.75	0.75	0	16.75	15.75	19.25	5.5	13	1.5	0.75
0.25	1.25	1.25	0.25	0.25	19	12.75	28.5	9	14	2.25	0.5
0.75	1	0.75	0.5	0.25	19	6.25	13	6	10.5	0.75	0
1	2.75	2	0.75	0	13.75	11.25	5	4.5	15.75	3.5	0.25
1.5	2.25	2	1.5	0.5	15.75	6.25	5.5	3.5	13.5	0.25	0.25
1	1.75	0.5	0.75	0	13.25	11.25	9.75	2	19.25	1	0.25
3	0.25	1.75	1.25	0.25	21	21	5	7.5	22.5	7	0.25
2.25	2.25	1	1.5	0	28.25	21	8	10.5	27.5	4.25	0
1.5	1.75	1.25	0.75	0	17	10.5	13.75	4.25	15.75	2	0.5
1.5	2.25	0.75	0.75	0	13	14.5	12.5	7.75	19.5	1.25	1
2	2	1.75	2.25	0.25	21.25	23	17.5	13.25	28.25	2.75	0.75
1	1.75	0.25	0.5	0	20.25	14	16.5	6.5	16.25	2.5	0.25
2.25	1	1	0.5	0	14.75	11	26.25	4.25	17.75	1.25	0.5
1.25	2	3.25	1	0	18	10.75	22	3.5	19.5	1.25	1.25
11.5	2.25	1.25	2	0.25	31	22	24	19.25	31	6.5	1.5
4.25	2.25	1.5	1	0.25	27.75	22.75	15	17	33.5	4.25	1.25
3	2.5	1.25	2	0.25	38.25	20.75	9.25	15.25	35.25	2.75	0.25
1.75	1.75	1	1.25	0	27	26.75	7.75	8.25	24.5	3.5	1
5.5	1.5	1.25	1	0	35	13	13	11.25	24.75	2.25	0.75
3.5	3	1.75	0.75	0	29.25	16.5	17.25	9	26.75	4.75	0.5
2	3	2.75	1.5	0	26.25	9.75	5.75	6.75	29.5	5.25	1
5	2.75	1.5	1.5	0	37	21	25	12	26	6.5	0.75
1.25	1.5	1.75	0	0.25	19.25	10.25	15.5	5	13.75	1.75	1
2.25	1.25	2.5	1	0.5	22.25	20.5	11.5	13.75	27	5	1.75
6.25	2.75	2.5	1.25	0.25	33	31	14.75	11.25	27.75	4.25	1
4.25	3.25	2.5	2.5	0.5	30.25	11	16.25	14.5	23.75	3.25	0.25
0.5	1.5	2	0.25	0	23.25	10.5	10	6.75	15.5	1.5	0.5
1	2	2.25	0.75	0	21.75	11.25	5.5	5.5	13.5	2.5	0.5
0.5	2.25	1.75	1.25	0	16.25	8.75	10.25	5.75	12.75	5.5	0.75
19	3	1	1.25	0.25	29.25	26	11	11.25	28	8.75	2
2.25	3.5	1.25	1.5	0	35.75	13.5	14.5	13	30.5	3.5	2.25
0.75	1.75	3.5	2	0	15	14.5	8.25	7.25	16	2.25	0.25
1.75	2	1.75	0.75	0	17.5	12.5	8	7.75	19.75	2.5	0.75
2.5	1.25	3.75	1	0.25	17.75	15	8.75	8.75	13.5	1	0.25
1.5	1.75	1.25	0.5	0	16	11	6.75	9.25	23.5	1.75	0.25
2	2.5	5	1.25	0.5	15.5	19	8.25	9.5	19.25	4	0.5
2.25	2	1.25	1.25	0	19.5	18.75	10.25	8	14.75	1.75	0.5
1.75	1.75	3.25	1.25	0	15.75	25.25	8	9	20.5	2.25	1
0.75	2.5	1.5	2	0.25	19.25	19.75	4.75	7.5	26.5	7.5	0.25
1.75	1.25	3.75	1	0	19	10.5	4.5	5.5	16.25	3.75	0.75
2	1.25	1	0.75	0	18	19	7.75	8.25	16.5	1.75	0
1.75	1.5	2.5	0.25	0	19.25	13.5	6.25	5	19	4.5	0.25
1	1.25	1.5	1	0	18.25	25.25	8.75	8.5	20.5	10.5	0
1.5	1.75	2	1.5	0.5	16	20.5	6.75	12.25	13.75	1	0.5
1.5	1	3.25	0.75	0.5	11	12	8.75	7.75	18.5	2.5	0
2	2.25	3.25	2	0	16	35.25	12	12	16.5	5.5	0
1.75	1.25	3	2	0	13.25	31.75	7	4.25	21.75	1	0.5
2.25	1.25	4.75	1.25	0	11.25	25.75	13	10	19.75	1.25	0.75
2.75	2	2.5	2.25	0.25	11.25	25.75	4.5	9.5	9.5	0.25	0.5
1	0.75	1	0.5	0	14.75	5.75	4.75	4.25	7	1	0
3.5	1.25	2.25	0.75	0	25.25	18.5	6.75	6.75	19.75	3.5	0.75
1	0.75	1	1.75	0.25	15.25	19.25	5.75	5	15.5	5	0.25
1.75	1.75	1	0.5	0	15	12.5	5.25	6.75	21.5	6.5	0.25
2.5	2.5	1	1.25	0.25	21.25	11	9	4.25	20.75	3.25	0.25
1.25	0.75	3	2	0	25.75	22	15.5	9.25	17.5	2	0.25
1.25	2.5	4.25	0.25	0	22	32.25	14.25	7.5	14.75	2	0.75
3	1.75	2	2	0.5	14.25	21	8.5	8.75	14.5	2.5	1
2	3.25	6	2.5	0.25	12.75	33.5	8	21.25	21.25	3.25	1
0.5	1.5	3.5	1.25	0	17.25	21.75	7.25	8.25	17.75	1.25	1.75
1.25	2.75	3	1.25	0.5	14.25	26.25	6.5	9.5	20.5	4.5	0.5
1.25	2.25	3.25	2	0.5	13.5	27.75	9	10.25	20.25	5.75	0.25
1.75	1	3.75	1.5	0	15	31.5	9	16.5	24.5	6.25	0
0.75	2.25	2.75	1.5	0.25	10.5	13.75	5.5	2.5	15.25	2.25	1
1.75	1.75	4	2.5	0	12.75	25	6.25	5.5	14.25	1	0.5
1.25	1.25	2.25	0.5	0.25	9.5	28.5	14.75	3.75	18.25	0.75	0
2.5	2.5	4.25	2.75	0.5	26.25	33.75	11	15.25	26.75	3.25	1.25
1	0.25	1.5	1.25	0	9.5	16.25	5.5	8.75	10.25	2	0.25
1.25	0.75	2	0.75	0	9	17.5	6.25	2.25	14.5	1.5	0.25
0.75	1.75	1	0.5	0	14.75	25	4.75	6.5	12.5	6.75	0.25
3.75	3.75	4.25	1.75	0.25	19	21.5	12.5	11.75	23	3.25	1.5
0.75	0.75	0.5	1.25	0.25	15.25	31.75	12	7	16.5	5.25	0.25
1.25	1.5	3	1.25	0.5	22.25	21.25	11.75	13.5	22.75	6	0.25
1	1.25	7.25	2.5	0	14.25	12.25	10	3.5	14	0.5	1
1.5	1	2.5	1.5	0.25	10.5	14.5	7	4.25	18	1.75	0.75
2.75	3.5	8.5	2.25	0.5	12	41.25	8	21.5	27	3.5	0.75
2.5	1.5	3.75	3	0.25	11.25	26	10.75	9	13.75	2.25	0.5
2	3.5	6.75	3	0.5	7.75	19.5	9.5	25	16.25	2	1.75
2.75	3	6	2.25	0.5	12.75	25.5	12.5	9.75	18.25	3	0.75
1	1	0.5	0	0.25	20.5	15	3.5	4.25	17.25	2.75	0.25
3.75	2	1.25	1	0.5	27.25	7.75	12.25	6	23.25	3.5	0
0.75	1	1.25	0.75	0	22.75	9.25	7.25	2.25	14.5	2.75	0.25
0.5	2	1.75	0.25	0	25.5	13.75	4.75	2	23.75	3.5	1.5
1	1.25	2.25	0.75	0.25	10.25	6.75	17.5	2.75	16.75	1.5	0.25
0.75	0	1.5	0.25	0	22	14.25	5.5	7	11.5	8.25	0.5
1.25	2.25	0.25	0.25	0	24.5	32.5	6.5	13.75	24.75	11.5	0
0.5	1.25	2	1	0	23.5	13.75	14.5	5.75	14.5	1.25	1
2	1.25	4.75	0.75	0.25	13.25	9.75	6.75	4	15.5	1.5	0
1	1	5.25	1	0	16.5	33.75	5	7.25	16	7.25	0.75
2.25	4	4	1.5	0.75	30.5	31.25	12	15	20	3	0.75
1.5	2.25	3.5	3	0	16.75	20.75	16.75	11.75	17.5	0	0.5
0.75	0.75	3.5	1.25	0.25	11.75	25	8.75	11	13.5	1.5	0.25
0.75	2	3.75	2.5	0.25	8.25	24.25	9.5	4.5	14	3	0.5
1.75	1.25	6.25	2.5	0	19	41.75	9.75	8	16.75	2.5	0.75
0.25	2.75	4.25	2.25	0	11.25	27.75	10.25	4.75	22.25	0.75	1.25
2.5	1.75	4	1.25	0.25	8.5	22.25	7.5	7.25	24.75	2.5	2
2	1.75	3.25	1.75	0.5	8	21	3	6.75	8	2	0.75
0.75	1	1.5	2	0.25	8.75	19.5	7.5	6.5	13.75	1	0
1.25	1.5	4.25	1.25	0.25	7.5	14	8.75	3.25	14.75	1.25	0.5
1.25	0.75	3.75	2.25	0	16	33	6.75	12	18.5	2	0.75
0.75	2.5	5.75	1.25	0.25	17	26.5	12	10.75	16.75	4.75	0.5
0.75	1.75	0.5	0.75	0	18	16.25	3	4.25	18.75	4	0.25
17.25	5	3.5	5	1.25	36.5	14.25	4.25	8.5	44	10.25	3
23.25	2.25	2.5	1.5	0	36	11.75	25.5	2.25	17.75	5.75	0.75
8.5	2.25	1	2	0.25	53.75	20.25	16	9.25	28.25	6.25	2
10.75	1.5	0.75	1.25	0	38.25	13.5	8.5	5.25	10.75	4.5	0.75
4.75	3	2.75	1.25	0.75	49.75	17.25	24.5	8	32.5	7	1.75
6.25	3.25	1	1.25	0	34.25	19.75	21.5	23.25	37.5	7.25	1.75
12	1.75	1.75	1.75	0.25	27.25	14.75	8	14	27	4.5	2
7	3	1.75	0.75	0.5	35.25	26.5	6.25	12	35.5	4.5	1.5
4.5	1	0.75	1	0.5	33.75	26.25	14.5	19.75	41.5	4	1
12.5	2.25	2.25	1.25	2.5	29.75	17.5	8.5	17.5	29	8.75	1.75
6.5	2	1.25	2	1.25	28	15.5	7.75	7.75	30.75	5.75	0.75
6.75	1.5	1	1	1.25	21.75	18	2.25	13.75	28.75	6.5	1.25
5.5	1.25	1.75	0.75	0.5	25.5	14.25	17.75	4	20	3.5	2.25
7.75	2	2	1.5	0.25	38	21.25	9.5	13	26.75	6.25	0.75
18	2.75	1.5	1	2.25	35	16.5	4.75	12.25	30	7.5	1.75
17	2.5	1	1.75	0.75	31	16.5	2.25	14.25	30	6.75	1.75
13.75	2	2.25	1.75	1.25	33.25	14.25	4.75	7.75	26.25	5	0.75
9.75	1.75	2.25	2	1	30	19.25	4.5	18	26.75	4.75	0.75
9.5	3.25	3.5	0.75	1.25	28.25	12	3	12	23.25	4.75	0.5
7	2.5	1.25	1.25	0.75	37	17.75	13.25	17.75	35	5	1.25
13.25	2.75	0.5	0.75	0.5	29.25	16	4.25	15.5	22.5	6.75	1.25
4	2	2.5	1.5	0.75	28	31	14	24.75	31	4.5	3.25
8.25	3	1.5	1	0.75	26	15	3.25	15.5	32.75	6.5	1.5
2	4.25	1	1.5	0.25	21.25	22.75	5.75	22.5	39.5	5.25	1.25
2.75	1.75	1.75	1.75	0.5	32	21	15.25	15.5	35.5	4.75	1
3	4.25	1.25	1.25	0.25	32.5	12.75	8.5	19	30.25	6.25	0.75
8.25	2.25	1.25	0.75	1.75	24.5	6	9.75	18.5	28	4	0.5
1.25	1.25	1	0.25	0.25	18	8.5	10.25	5	12.25	1.25	0.5
0.25	1.75	1.25	0.25	0	16.25	9.25	9.25	2	10.75	2.25	0.5
1	1.25	1.25	0.25	0	20	14.25	5	6.25	13	2.25	0.5
1.25	1.5	2.25	1.5	0.25	17.5	7	5.5	5	14	1.25	1.25
0.75	0.5	2.5	0.25	0.25	16.25	10.75	5.5	5	13.25	1.5	0.5
2.5	1.25	1	0.5	0	22	10.75	2	3.75	22.75	3	1
1.5	2	1.75	0.5	0	19.25	23	13.75	16.5	20	5.5	0
1.5	0.25	2.25	0.75	0	16.5	11.75	6.25	5.5	10.25	2.5	0.5
0.75	0.75	1.75	0.5	0	22.75	14.25	3.25	6.75	16.25	3.75	0.25
0.25	1	3.5	1.25	0	16.25	12.5	11.75	9	12.5	0.75	0.75
0.25	1.25	4.75	1.25	0	12.25	26.25	7.25	13.25	19	1.75	0.25
1.75	1.75	1.5	0.25	0	19.5	12	5.5	12	18.5	1.25	0.25
0.5	2	1.5	2.75	0	14.75	28.75	10.25	11.25	16.25	6.75	0
0.75	1	6.5	1.75	0	11.75	17	18.25	5	25	3.75	0
1.25	2.5	3.75	2.75	0	15.5	40	15	6.5	22	5.25	0.5
1.75	1.25	5.25	1	0.25	27.5	10.5	10.5	12.5	12	2.5	1.25
0.75	0.5	3.25	0.5	0	13.5	17.75	3	7	14.75	7.5	0.25
22.25	2	0.75	0.5	0	18.25	9.5	1	5.25	11.25	5.5	0
0.75	0.75	2.25	0.5	0	11.5	6.75	8.75	2.5	12.75	0	0
0.75	1	3	2	0	11.25	22	1.75	3	10.25	1.75	0.5
0.25	1.5	3.25	2.5	0	13.75	35.25	6.25	11.5	17	3.75	0.5
2.25	2.5	3.5	1.25	0	13.5	33.25	6.25	10	23.25	3.75	0.25
0.25	0.75	2.25	0.75	0	8.5	16.25	5.5	2.75	12.25	0.75	0.25
2	2	2.25	2.5	0.5	18.75	22.25	6.25	10.5	13	1.75	0.25
1.25	0.75	2.5	1.25	0	12.5	13.5	5.5	7	13.5	2	0.25
1	1.5	3	1.5	0.25	16.25	23.75	9.5	19.5	18	1.75	0.5
1	1.5	1	2	0	12.75	14.25	7	10.25	13.75	4.75	0.75
1	1.25	1.5	1	0	7.25	14.75	10.75	2.25	14	1	0.5
0.75	0.75	1.25	0	0	18.75	17	3.75	8	14.75	2.25	0.25
0.25	3	2.5	1	0	9.5	29	6.5	8.25	21.5	1.75	0.25
0	1	4.25	1.25	0	15.75	21	11.5	14.25	23	4.75	0.5
1.25	4.5	5.25	3.75	0.25	11	29.75	7.5	14.75	21.75	1.75	1.5
2	0.25	3.25	2.25	0.25	8.25	15	7.75	7	14.25	0.5	1
0.75	1	2	1.25	0	3.75	12.5	5	3	13	1	0.25
0.25	0.75	1	1.25	0	19.75	19.25	5.75	14	19.75	3	0.75
0.5	1	2	0.25	0	14.75	12.75	7.75	8.5	10.25	2	0.5
0.75	1.25	0.75	0.25	0	9.5	22.5	2.75	10.5	18.25	3.5	0
1.75	1.75	3.25	0.75	0.25	14.5	20.75	5.75	9.75	20.25	4.5	0.75
2.75	3.75	3.5	2.5	0.5	19.25	32.5	9.5	8	18.5	1.25	0.5
0.5	1.75	3.75	2.25	0.25	8.75	23.25	5	4	11.25	3	1.5
0.75	1	1	0.75	0	12	21.5	9.75	9	15.75	4.5	0
1.75	1.75	4.5	2.75	0.25	8.75	17.5	6	5.5	17	2.5	0.75
0.75	1.25	2.5	1	0	10.5	22.5	3.25	15.75	19	2.5	0
1.5	1.75	4	2.25	0.75	13.5	24.5	7	10.25	14	6.5	1
1	1.75	6.5	2.5	0.25	12.75	18.25	5.75	4.25	20	1.25	0.25
2.25	2.75	4.25	2	0.25	10.5	26.75	4	6	18.75	1.5	1
1	1.75	3	2.75	0	8.75	27.75	11.75	5.75	15	3.5	1
1.25	2	1.5	2	0	10.25	19.5	6.75	9.5	14.25	3	0.25
1.25	1	4	0.25	0	9.25	30.5	6	7.5	17	2.75	0.75
1.5	2.5	1.25	2	0	10.75	33.5	9	10.25	20.75	3	0.25
2	7	6.25	4.5	0.75	13.75	34.5	6.5	9	15	3.25	2.75
1.25	2	4	3.25	0.75	7.25	21	9.25	9	16.75	2.25	0.75
3	1.25	5.75	2	0	5	25	7.25	8.75	9.75	2.5	1.25
3.5	1.75	4.5	3.5	0.5	16.75	34	8.5	19	19	0	2
0.5	0.5	4	1.75	0.25	8.25	16.5	5.5	3.5	16	3	0.25
1	1	1.5	0.25	0.25	26.25	11.5	6.25	2.75	21.5	2.75	0
6	1.25	1	1.75	0	26	9.25	6.5	9	11.75	4.75	0.25
18	3.75	4	3.25	0.75	35.5	15	8	16.5	21.25	9.75	1
18.75	2.75	1.5	3	1.5	33.75	15.5	24.75	19.5	21	7.75	1.75
9.75	2.5	0	1	0.75	34.25	15.75	10.75	14.75	26.5	7.25	1.75
4.25	3	1	0.75	0.75	21.5	11.75	7.75	19.75	36	4.25	1
6.75	2.25	0.5	1.75	0.25	21	8.75	12	12.5	15.75	3.75	0.5
0.75	1	1	0.75	0	14.75	9.25	1	5.5	13.5	0.5	0.5
0.25	0.25	0.5	0.25	0	14.25	10.25	1	2	13.75	0	0.25
1.5	1.5	2	0.5	0	13	12.5	3.75	2	14.25	0.5	0
1.75	1.25	5	0.75	0.25	15.5	15.25	19.75	8.5	22.75	1.25	1.5
0	0.5	2.25	1.5	0.25	21.75	32.5	9.25	12.25	17.75	4	0.25
0.5	2	5.5	1	0.25	12.75	27	5.75	11.5	17.25	2.25	0.25
0	1	0.5	1	0.25	10.75	22	2.75	11.25	19.5	1	0.75
0.75	1.75	2.75	1.5	0	23.5	22	7.25	6	14	1.5	1
1	1.5	3.5	0.75	0	10.75	21	7.75	8.5	18	6.25	0
1.25	0.5	0.75	1.75	0.5	14.75	33.5	11.5	13	16.75	2.25	1.25
0.5	0.75	2	1.5	0.25	11.25	17.5	3.5	4	13.5	2.25	0.25
1	1.5	3.5	1.5	0.5	13	18.75	4.25	12.25	18.25	3.25	0.75
1.25	0.75	2.75	0.5	0	11.5	28	12.5	11	22.75	3.25	0
0.75	0.75	1.75	2.25	0	15	22.75	6.25	5.25	15.25	7	0.25
1.5	1.75	7	2.75	0	9	23.75	12.5	7.5	20.75	1.5	1.25
1.5	1.5	4.25	2.5	0.25	13.25	22.75	8.25	11.25	13.5	2.25	1.5
0.75	1.5	6.75	2.5	0.25	15	27.25	6.25	13.25	12	1.5	1
1.25	2	3.5	3	0.25	7.25	21	7.25	2.75	9.75	2.25	0.5
[truncated: 41,201 more rows]
