# Supplementary material for: Global sleep homeostasis reflects temporally and spatially integrated local cortical neuronal activity
Source: eLife. 2020 Jul 2;9:e54148. doi: 10.7554/eLife.54148 (PMC7332296; doi:10.7554/eLife.54148)
Supplement: Figure 1—source data 1. [file elife-54148-fig1-data1.zip › Figure 1/Firing Rates/Firing-Rate-Mouse-4.csv]

LFP 1	LFP 2	LFP 3	LFP 4	LFP 5	LFP 6	LFP 7	LFP 8	LFP 9	LFP 10
0.25	8	6	5	10.25	26.5	25.75	10.25	19.75	24
1.25	7.75	9.75	11.25	15	26.5	36	17.5	31	27
2	6	13.75	13.5	10.75	28	30	16.5	14.25	26.75
3.25	4	13	19.25	17.75	31.25	33.5	17	14.75	22.25
1.25	5.5	5.75	8	6.75	27.25	27.5	11.75	15	24.75
1	4.75	9.5	6	9.5	25	30	9	16.5	21.75
0.25	9	10.75	17.25	12.25	30	34.5	16	28	29.75
3.25	9	10.25	23.25	16.5	34.5	34.25	24.5	26.25	31
1.25	6.75	6.25	11	8.25	27	31.25	12	22.25	22.5
0.75	4.25	11.75	5	12.75	26.75	30	7	26.25	25.5
2.5	5	9	10.5	14	33	35.5	16.5	13.75	33.5
2.25	2.75	6.25	12	14	25.75	43	17	23.25	34.5
1	6.25	6.25	15	12.5	28.25	38.5	14	17	31.5
1	7.25	9.25	19.25	14.5	30.25	35.25	10.5	30.75	29.75
0.5	10.25	12	16.75	13.25	32.25	25.5	7.5	12.25	29
1.25	13.5	9.75	33.25	14.75	34.5	49.5	14.25	26	32
1.75	14.75	13.25	23.25	8.75	31	59.75	15.25	24.5	32.25
3.5	15.75	7.25	14.25	10	37	45.5	10.75	25.25	29.5
3.25	11.5	11.25	39.75	14.5	34.75	41.75	25	49.75	29.5
1	9	10.75	35.5	15.75	34.75	49.25	32.25	37.75	41
0.5	4	7.25	15.5	18.25	35.5	34	20.75	37.25	34.25
1	10.25	18.75	24.5	15.5	40.25	35	23	28.75	36.75
1	6.5	12.75	33.5	11.75	46.25	43.75	20.75	39.5	46.5
0.25	6.5	13	20	13.25	35	36	14.25	29.25	35
0.5	7.25	9.75	16	15.25	29.25	40.25	13.5	28.25	32.5
2.75	11.5	11.25	32.25	11.5	35.75	42.25	24.25	24.5	34.75
1.75	3.75	6.5	12.5	15.75	30.75	31.25	13	20.5	27.75
1.25	8.5	21.25	19.75	21.25	34.5	34.25	11.5	35.75	30
1.5	6.5	15.25	32	12.75	32.25	55.5	17.25	40.25	41.5
1.5	7	10.75	12.75	17.25	34.25	40.5	17.25	32.5	28.5
1.75	7.25	13.25	17.5	12.5	54.25	36.25	12.25	35.5	36.75
0.25	1.75	3.5	5	16.25	29.75	24	5.75	10.5	22
1	3	3.5	7	16.25	29	28.25	13.75	21.25	23
2.75	6	8.75	11.5	20.5	28.5	27	18.5	27.25	24.25
0.5	7.5	15.5	5.25	6.75	25.75	21.25	5.5	27.75	18.75
1.25	3	6.25	5.25	15.5	42.5	49.5	19.75	17.5	28.75
1.25	12	13.5	3.75	7.75	20.5	30	10.25	21.25	21.25
0.75	6.75	19.25	7.75	8	33.25	27.5	10.25	22	19.75
0.5	6.75	22.5	10	9.5	19.25	35	10.25	29	22.25
1.5	3.5	11	6.75	10.25	34.25	34.25	9.25	21	26.25
0.5	3.75	4.25	7.5	9	30.25	28.75	10.25	12.5	19.25
2.75	12	20.25	27.5	29.5	46	51.25	27	33	31.25
0.75	7	8.5	14	11.75	37.5	37.5	14	26.25	23.25
0.5	5.5	9.75	10	9.75	22.5	20.75	6	11	18
1.25	7	13.75	13.5	9.25	33.75	32.75	10.25	16.5	21.75
0.25	10.5	17	12.5	7.75	34.5	28.5	9	37	23
1.25	3.75	5	7.75	8	23.75	30.75	10.5	13.5	22.5
1.25	5.25	14.5	12	9.25	26.5	23.5	11.25	13.5	17
2.25	7.75	19.75	21.25	22.25	39.5	36	19.75	30.75	28.25
0.5	9.25	18.75	18.25	13.75	32.25	36	19.5	28.5	27.5
0.5	4.25	5.5	9.25	9.25	27.75	22.5	10	16.25	19
0.5	3.25	5	7.75	13	30.25	29	9.5	24	20.75
1	4.25	7.5	11.75	9.5	33.25	28.25	10.5	15.25	20.25
2	12.75	17.25	20.75	21.5	35.25	35.25	23.75	17.5	27.75
0.5	6.25	20	14.75	9	29	23.75	8	21.25	21.5
1.25	6.5	8.5	12	7.25	24.5	22	12	17.75	13.25
1.75	6	7.25	11	10.5	27.25	27.75	7.75	26.5	16.25
1	2.25	7	13.25	6.75	30.25	27.75	12	24.5	21.5
1.75	4.25	12.25	12	9.5	39.5	34	12.75	18	28.5
1.25	6.5	9.75	11.75	7.75	25.5	19.5	11.5	16.5	18
1	3	7.75	9.5	10	22.75	31	12.75	13	17.25
0.75	6.25	17.25	11	10.5	32	25	9.25	12	15.75
2	3.5	10	10.75	22.75	33.75	27.5	13.5	14.5	19.25
0.75	7.25	13.75	14	18	41.5	37.25	10.75	19.5	30
4.75	15.5	29	34.75	23.75	54.5	67.25	17.25	22.5	28.75
2.75	17.75	25.25	23.25	23	93	50.5	7.5	40	28
1.5	7.25	17.5	23.25	16.75	49.5	36.25	15.75	19.75	24.25
2.25	3.5	12.75	14	17.5	28	28	15	12.25	19.25
2	4.5	13.25	12	14.75	28.5	41.5	19.75	15.25	32.5
2.5	6.75	17.5	22.75	19.25	19.75	29.5	18.5	12.5	23.75
3.5	5	11.75	15	16	24.5	23.25	21	12.5	24
2	8.25	24.75	22.25	10.25	28	31	19.5	21.5	25.25
1.75	6	12.75	10.5	10.25	22.25	18.75	15.25	13.5	15.5
3.5	4.5	10	25.25	16	33.25	34.75	33.75	11	26.75
9	10.25	17.25	16.5	25	29.25	32.75	27.75	27.25	23.5
3	9.75	17.25	11.5	8.5	24.5	19	14.5	18	16.25
3	4.5	8	9.5	6	24.25	13.75	13.5	15.75	17.5
0.5	5.25	19.25	14.75	10	17	22	14.75	23.75	22.5
5	7.25	12.75	15.75	15.5	24.75	22.25	23.5	19.75	18.25
9.75	8	15.75	21.75	23.75	21.25	26.75	22.25	17.5	24.25
2	4.5	7.75	14	13	21.5	18.25	13	19.75	13.5
2.5	5.75	11.5	13	17.25	27	21	18.25	14.25	23.25
1.25	6.5	20.5	9.75	11	24.5	21.75	17	29.25	16.5
2	6	16.5	16.25	19	30.75	15.5	23.75	24.75	17.75
2.75	5.75	11.5	12.25	11.75	22.75	20.25	18	12.25	22.25
6.75	16.5	20.75	24.5	17.5	28.5	28.25	25.25	21.75	25.5
1.25	7	11.75	9.25	7.75	17.75	16.5	17.5	19	16.5
4	9	15.5	21.75	22.75	30	30.25	30.75	23.25	27
3.5	13.5	23.75	18.25	12	25.25	28	20	33.5	20.25
2.25	10	6.5	17.25	14.25	24	28.75	16	28.25	17.75
2	7.5	14	21.25	23.75	30.75	26.75	24.5	21.25	21.25
1.75	9.5	16.25	13.25	11.75	21.75	21.5	13.5	22.25	17.25
0.75	0.75	3.5	11.5	8	15	18.5	14.75	11.5	16.75
4.75	7.25	9.25	24.5	14	23.25	26.5	25	12.25	19.25
2.5	8	15	20.75	16.5	26.25	24	21.5	34.5	24
4	9	15.75	16.75	12.5	19	16.75	17.5	16.75	20
1.75	6.5	15.5	11	11.5	19.75	20.25	16.5	14.75	22.25
2	8	11	13.25	14	22.25	24.5	20.75	20.75	25
2.75	9.5	17	23.5	19	30.5	26.5	23.25	21	22.25
3.25	9.75	12.5	17.75	20.5	21.75	20.25	21.5	15.25	20.5
2	6	8.75	12.25	15.75	23.75	16.75	16	20.5	17
1.5	8.5	16	8.75	10.5	21.75	17	14	26	15
1.5	11.25	17.25	15.5	11.25	25	25.75	18.75	18	23.75
2.25	7.75	14	21	23.75	32	38	34	25	29
6	9	12.5	20.75	13.25	20	22.5	16.75	29.75	25.5
1.75	9.75	16	7.25	9.75	19.25	23	14	18.25	27
1.5	3.75	7.5	13	10.5	19.5	18	18.75	16.75	20.75
2	10.5	12.5	7.25	8.5	16	12.5	13.25	8.5	16
10	23	40.25	40.5	31.25	53.75	32	23.25	47.75	44.75
9	25.5	41.25	45	39	65.5	44.75	19.5	61.75	46.25
2	8.75	17.5	25.25	19	37.25	29.5	14.5	25	22.75
0.25	3.5	10.25	14	12.5	22	20.25	14.75	14.25	17.5
1	2.75	5.25	17	18	35.5	24.75	19.5	21.75	22.75
1	16.5	24	17.25	13	27.5	27.5	21.25	28	17.25
3.5	10.25	16.75	16	16.5	22.5	23	20.75	14.5	25.25
0.5	9.5	13.5	17.5	19	21	19.5	20	33.25	21.5
1.75	12.5	20.5	22	19	26.5	29.5	25.75	19.25	21.25
2.25	8.25	11.5	13.75	17.5	17.25	23.75	14.75	18	20
2.25	11.75	20	14.5	11.5	20.5	20.75	12	16.25	20.5
3.25	5	10.75	19	19.5	26	24.5	22.5	20	23.25
2.5	6.5	14.5	18.75	16.25	25.75	24.5	19.75	22.75	19
0.5	6	10.5	14	13.75	20.25	17	12	32.75	20
3	7.75	14.75	24.75	21.75	33.75	27.5	27	11.75	20.25
1.25	7.75	9.5	8	15.25	21	15.75	13.25	14	16.5
1	12	14.25	21.5	19	24.25	27.25	24.75	20.5	25.25
0.75	8.5	18.5	18	10.25	21.25	23.25	13.5	19.75	22.75
2.5	9.25	16.5	12	7.25	21.75	19.5	14.5	28.25	18.75
1.5	5.75	9	16.25	14	19.75	15	13	26	17.25
1.5	7.5	10.75	15.75	15	19.25	20	12.25	22	16.25
2.5	11.25	13.75	11.5	15.75	22.25	22.5	18.25	14	19.25
2.5	6.5	21.25	19.5	14.75	20.25	23.25	19	16.75	18.75
1	8.5	10	15.25	9.75	17.25	15.75	12.75	12.75	16.75
3.75	15	22.25	31	13.75	29	26	24.75	27.5	28.25
3.75	10.75	11.5	21.75	17.75	30.75	34.5	29	30.75	27.75
2.75	9.75	17	18.75	15.5	20	21.75	17.25	21.75	20.75
1.5	11.25	12.25	21.25	18.25	20	23.25	21.75	24	25.75
1	6.25	18.5	15.75	13	16.5	22	15.75	28.75	20.25
2.5	10.75	11.75	16.75	19.75	25.25	22	22.5	23.25	24.25
3.5	10.75	16.5	15.75	11.75	24.75	28.75	19.5	19.5	24
2.5	10.5	18	15.25	12.75	22	23.25	10.75	31.25	20
0.75	7	15	12.75	7.5	16.75	11.25	7	12.75	17.5
1.5	12	11.5	13.75	7.75	29	23	17.75	14.25	23
2	9.5	12.5	23.5	16.75	24.25	27.25	28	18.5	27.25
4.25	9.5	9.75	27	19.25	26.75	29	21.75	14.25	24.5
3.5	11.75	13.5	20.25	18.5	15.75	22.25	15.25	32.75	20.5
1.5	5.5	6	16.5	14	12.75	21.75	13.5	7.25	20
1	8.5	21.25	14	15.5	60	25	15.25	29.75	19.5
2	12.75	21.75	17	17	51.25	30.5	12.5	22.25	22.75
1.5	6	8.5	14.75	15	26.5	26.75	15.75	11.25	26
5.25	19	30.5	29.75	30.75	74.25	35.75	16.25	55.25	34.5
2.75	11.5	18.25	22.5	22.25	41	30	8.75	25.25	30.75
1	9.75	27.75	23.25	25.75	34.25	42.75	10.5	22.5	27.5
1.5	4.25	11.75	24.75	26.25	35	32.75	18.5	20.25	30.25
2.5	2.75	8.5	15	20.25	28.25	32.75	17.75	14	30
2.5	6	14.5	18	22.5	27.5	32	21	23.5	20.5
4.75	18.75	27.25	31.25	19	37	31	16.25	45.25	24.5
1.25	5.75	14.25	18.75	16.5	44.5	26.25	13	34.25	26.5
1.25	11.5	29.5	21.25	13.75	27.5	33.5	19.5	19.75	26.5
5.75	9.25	17.25	17.75	31.25	30.5	30.25	29.75	24.5	28.75
1.5	10	11	10.5	9.75	17.5	13.5	9.25	16.5	17
1	8.75	18.75	13	13	21	19	14.5	29.25	23
5	6.5	16.75	18.75	24.5	29	32.5	20	16.25	29.5
3.25	10	15	20	19.5	29.5	30.75	18	15.75	28.25
0.75	8.25	8.75	10.75	11	21.5	17.25	13.5	16	17.25
2.5	12.25	21.25	22	11.25	22.75	23	14	30.75	28.25
0.75	5.5	12	6	4.25	15	27.25	11.5	11.25	16.25
1.25	3.25	6.75	13.75	17.25	23	21.25	18	11.25	18.25
4	10.5	14	14.25	16.25	29.5	29	19.75	23.5	22.75
2	10.75	19.25	26.25	20.75	26.5	32.5	23.75	21.25	27.5
1	6.5	18.75	12	10.75	15.5	16.75	7.75	21.75	17.25
3	11.75	13.5	18	16.25	22.75	30	18.75	22.75	25
1.75	14.25	11.5	16.75	19	27.5	27.25	16.75	37.5	28.25
1.75	3.75	16.5	14.5	9.75	19.5	28.75	18.75	19.5	23.5
2	4.75	10	7.5	14.25	23.5	20.25	13.25	12.75	22
1.5	5.75	15.75	15	13.5	46.25	29.75	8.25	15.5	23.75
1.75	14.25	26.75	18.75	19.25	48.25	35.25	8.25	15.25	28
2	14.25	35.25	31.5	23	80.5	39	12.75	50.5	24.25
1	9.25	20.5	17.25	14.25	25.5	32.5	17	19.25	22
1.5	7	30.75	15	12.75	25.25	25.75	14	26.25	34.75
3.5	10.25	12.75	22.25	23.25	32	26.75	26.75	16.75	27
5	13.75	18	19	18.25	19	24.25	18	18.25	18.25
1.25	8.5	18.25	13.5	7.5	16.25	18.75	10.25	13.5	15.75
2	9.25	11	14.25	18	38.5	23	15.75	25.75	21.25
2.25	10.5	16	28.5	27.5	35.5	44	28.5	17.75	22.5
2	4.5	8.75	11.5	23.5	31.5	31	17	21.25	25.5
1.25	9.75	14.75	15.25	12.5	23.25	24	6	26.75	17.5
2	3.75	6.25	15.75	18.25	22.25	27.25	20.25	23.5	20.25
1.75	8	19	25.25	17.5	33.75	29.75	22.25	21	27.75
2	6.25	7.5	13.5	15	16	25.5	12.5	29.25	15.75
2.25	7.75	16.25	13.75	11	24.5	21.25	9.75	19.75	20.75
1.75	10.5	16	13	15.25	15.75	23.25	10.5	13.75	19.5
2	3.5	5.25	11	7	16.25	15.25	8.75	12.5	21.75
2.25	9.75	20.75	25.25	21.75	36.75	39.5	24.75	20	31.5
2	9.5	12.25	16	15.25	19.75	23.5	15.5	29	24.75
2.25	13	19.5	16.5	9	22.5	26.75	12.5	25.5	26
5	12.25	15	20.5	16.25	32	36.25	17.75	36.25	25.25
1.5	10	10.25	25.5	23	28.5	36.25	25	25.25	25
1.25	6.75	10.5	14	11.5	18.75	23.5	10.25	27	24.25
1.5	6	6.5	11	10.75	23.75	21.75	11.5	19.75	21.25
1	5.75	10	11	10.25	28.75	18.75	12.5	12	14.75
1.25	3	10.25	10	10.5	32.25	20.75	9.75	17.5	19
1.5	6	10.5	10	15	16.75	19	8.25	22	20.25
2.5	8.25	15.25	14.5	18.5	29.75	38.75	19	20.75	29.75
1.25	4.5	17.5	10.75	7.5	14	19.25	8.25	17.25	13.25
0.75	7.5	18.75	17.75	16.25	27.25	31.5	17	26.25	26.5
1.25	4	8.75	12.25	8.5	19.75	24	10	12.25	17.75
3.75	9.5	14.5	13.25	20.25	26.5	36.5	14.75	22	34.5
1.5	9.75	17	19.5	11.5	26.75	31.5	13.75	21.25	21.5
3.5	13.25	20.75	26	19	32.5	32.5	22.5	30.75	28.25
1.75	10.75	11	17.5	11.75	29.25	34.25	14.25	23.25	25.25
3.5	7	17	26	21	33.25	39.5	23	18.5	27.75
2.5	7.25	10.5	18.5	8.5	22.75	21.25	10.5	25	26.75
2.25	8.5	8.25	12.5	10.75	23.5	29.5	15.75	21	25
2.75	7	11	18.5	15.5	26.5	23.75	11.5	33.25	25.5
4.75	6.25	13.25	15	16.75	30.5	38.25	20.5	17.25	29.75
1.75	4	5.75	13	11	26	30.25	12.25	9.75	26.5
0.75	7.5	16.5	19.75	13.25	28.75	35	11.25	24.75	27.5
2	5.75	7.5	17.25	20.75	28.5	38	16.5	11.25	30
2.75	6.5	12.5	20.75	15.5	35.5	31	18	13.25	29.25
1.25	4	10.5	20.75	18.75	28.25	34.5	13	24	31.25
1.25	6.75	10	15.75	13.75	28	36.75	16	27.25	27.5
1	11.25	13	22.75	21.75	26.5	31.5	15.5	32.75	28.5
0.75	8.5	16.75	28.75	20	33.75	31	16.25	23.5	30.25
1.5	8.75	14.75	13.25	21.5	30.75	29	13.25	17	29.75
1.75	4	8.5	20	24.75	36.25	50	22.25	21.75	34.75
1.25	6.5	17.25	22.75	19.5	29.5	54	26	26.25	28
1.25	4.75	8.25	20.75	7.5	31.5	34.75	13.75	33.25	30
2.25	6.25	9.5	20.25	12	24.5	36.25	14.75	35.75	28
1	3.5	6.5	14.75	15.5	28.5	21	10.5	16.75	23.25
1	4	6.5	13	10.5	27.25	26.25	6.75	11.5	26.75
1	4	15.75	12.5	11.25	42.5	33.25	10.75	26.75	24.75
1	10.5	26	15.5	17.25	47.5	36.75	8.25	33	29.75
1.25	8.25	13	12	15.25	26.5	31	6.5	25.75	23
2.25	4.25	9.75	11.25	20.25	31	38	13.25	27.25	21.5
1.75	10.75	12.75	16.5	13.75	30.25	29.5	15.5	22.5	22.5
2	6.5	30.25	12.25	7.5	27.25	28.25	8	23	17
3	8.25	12	10	12	27	28.25	18.25	15	26.25
4.5	5.75	9.75	15.5	23.25	31	38	19.5	27.5	27.5
1.75	7.5	10.25	14.5	10.5	24.75	26.5	8.75	23.25	20
1.25	3.75	6	9.5	11	33	47	14.75	18.75	27
7	9.75	19.5	28.25	21.75	44.25	46	26.25	26	34.5
2.75	13.5	24.25	17.25	10.75	19.25	30.75	9.75	16.5	16
0.5	4.75	8.25	8.75	9.25	25.75	27.5	9.5	14.5	19.5
3.25	10	22	20.5	11.25	30	31	16	14.5	25.5
6.25	7.5	18	20	22	32.5	37.25	15.5	19	23.5
2.5	6.75	13.25	20	11.75	24.5	32.5	8.5	20.75	18.75
2	7	8.75	10.75	10.75	27	33	12.25	17	17.75
1.5	5	11.75	10.5	10.75	24.5	15.75	13.5	18	21
0.25	5.75	14.5	12	10.5	25.5	21.25	7.75	23.25	19
1.75	12	15	21.5	7.75	24.5	26.5	14	16.25	24.25
0.75	2	6.75	9.75	8.75	33.75	28.5	11	11	22.75
1.5	6.75	20.5	12	12.75	26.75	22.5	14.5	25	26
2.5	5.5	16	16.5	12	30.25	30.25	18	18.75	23.5
3	6.75	7.25	12.5	12.25	22.25	21.75	13	12	17.25
1.5	3	7	8.5	12.25	20	22.5	9.75	18	16.5
1.25	4.25	11	16	16.75	29.75	23	8.75	29.5	26.5
2	7.5	15	17.75	7.75	24	29.25	12.5	19	22.25
1.75	6	11.25	15.75	13.25	29.25	32.75	12.75	24.75	24.75
4	12	17.25	29.5	14.25	33	33	21.5	18.5	30.5
2.5	6.25	8.75	19.75	14.75	29.25	31.5	14	21.5	26.75
2.5	10.25	11.5	15.5	14.5	24	27.75	10.75	28.5	25
3.25	10.25	12.25	20.75	9.25	28.75	34.5	21.5	21.25	21.5
1.75	15.25	17.25	27.25	13	28.5	33.75	18.25	20.5	28.25
3.75	6	13	13.5	9.75	23.25	27.25	12.75	24	23.25
1.25	4.25	7.5	13.5	13.75	32.25	33.25	16.25	14	28.25
2	6.25	12.25	12	8.25	27.25	27.75	12	22.75	25.75
0.5	4.5	8	10.75	9.75	23.25	28.75	11	10.25	19.5
1.75	4	9.75	15.75	18.25	31.5	17.25	12.5	14	18.5
1.25	6.25	11.5	16.75	11.5	23.5	20	17.25	10.75	12
1	5.5	10	9.25	8.25	27	27.75	5.25	10	19.5
2.5	7.25	18.5	16.25	8.5	24	24	12.25	18.75	21.5
2.25	8.75	16.25	17.25	8	28	23	12	19	19.75
3.25	7.5	11	19.75	19.5	32.25	33.25	19.25	18.5	25.75
2.5	3.75	5.75	11.5	6.5	17.25	24.5	7	20.5	11.75
0.75	7	12.5	11.75	11	27.5	20.75	6.5	16.5	21
2.5	7	16.25	12	4.5	26.5	37.75	12.5	16.5	24.25
1.75	9	11.75	17.25	17.5	33.5	38	21	11.75	25.25
1.75	7.25	9.75	14.75	17.75	24.25	32	9.75	24	22.25
2	11	21	18.25	11	30.75	34.25	10.75	25.25	25
2.25	7.75	13.75	20.25	10.75	29	36.75	15	37.5	24.5
1.25	3	5.75	15.5	19.75	33.75	37	18	20.5	28.75
1.5	3.5	7.75	11	14.5	30.25	30.75	14.5	16.25	18.75
1.75	5	5	10	8	27.25	28.25	13	24	24.5
1.5	5.5	13	12.25	17.75	27.5	26.5	13.75	24.25	27.25
1	7	9.25	20.25	13	31.25	41	12.25	22.75	26.25
1.25	8.25	13.25	15.5	15.5	25.25	44.5	13.25	29	24.25
0.75	9.25	13	17.25	14	37.75	49	14.75	26.75	28.5
1.5	9.75	14.25	27.25	12.75	33	44.75	18	30	24.5
1.25	9.5	16	21.75	17.25	34.5	36	18.75	16.75	30
0.75	11.5	16	46.25	14.25	42.25	44.5	19	33	29.25
2.5	10.75	15.5	25.75	14.75	42	48	22	34.25	32
1.75	9.5	10.5	18.75	13.25	31.75	37.5	13	18.25	29.75
1	8.5	8.5	24.25	16.75	32.25	41.25	18.25	15.75	27.5
1.5	6	6.25	24.25	17	36.25	38.75	11.25	35.25	25
1.5	7	6.75	15.5	9.75	33	33	11.5	21	30
1	5.5	7.25	18	15	33.5	37.5	15.5	24.75	23.5
0.5	7	10	19	11.5	36.5	41.25	12	23.75	24.75
3.25	6.75	10.75	31.25	13.25	41.75	44.25	24.5	22.5	29
1.75	15.25	21.25	38.75	11.75	40	46	20.25	34.75	33.25
1.25	14	21	38.5	11.25	40.75	37.25	24	20.75	35.75
2	12.5	15	28	18.25	40.75	48.75	14.75	40.75	32
1.75	8	8.75	19	16.5	32.5	44.25	12.25	39	24
2.75	15.5	15.75	40.5	18	43.75	51.25	25.5	38.75	33
2	10	13.75	32	11.5	39.5	43	18	29.5	34.5
2.5	6.5	19.75	35.25	10.5	38.25	47.5	16.25	43.75	33.5
1.75	9.5	11	20.5	17.75	35.25	46	16.75	25.75	21.25
1.75	9.5	19.5	45.5	11	48.5	49.75	20.75	24.5	42.5
2.5	16.75	11.25	28.25	16.25	38.75	43.75	13.5	33	33.75
2.75	16	17.25	38.75	19	34.25	46.75	11.75	30.25	31.75
1.5	16.25	13.25	19.5	20.25	28	44.5	9.75	26.25	31.25
0.5	1.5	10	21	18.5	31.5	33.75	12.5	16	25.5
1.75	12.25	7.75	26	26.5	37.75	42.75	20	32.5	29.75
2.75	11.25	17.75	29.25	13.5	40.5	32.25	17.75	21.75	29
1.25	5.5	8.75	35.5	13.25	34.75	34.25	10.5	50.25	34.75
2.25	5.75	12.75	28.75	8.5	40	31.5	11	48	36
1	7.25	10.5	37.75	12.5	43	47.5	19.5	31.5	33.75
2	9.5	7.25	34.75	17.75	42.75	42.5	17	21	41.75
2	7.5	18	33.75	18.25	40.25	47.75	16.75	31.25	37.75
0.25	7	11.75	11.25	7.5	33	45.5	8.75	36.25	23.75
4.5	13.25	22	23.75	16.75	45.5	58.5	10.75	30.5	34.25
1.5	5.75	17	16.5	18	42.5	45	4	26.25	28.5
1	4.5	16.25	18.75	12.5	36.5	34.25	6.5	22	22.25
2.5	1.75	9	11.25	16.75	30	28.75	13	31.5	23.75
6.75	11	18.75	19.25	18	33	36.5	17.5	21.5	23.25
2.25	7.5	15	15.25	8.5	21.25	28	14.75	16	18.75
4.5	3	5.25	15.5	13.5	27.75	19	13	16.25	15.5
2	6.75	11.75	9.25	15	28.25	26.5	8.25	38.75	24.5
1	4	8.75	7.5	9.75	24.25	29	9	24.5	15
2.5	7.25	14.5	12.75	17.75	30	25.25	11	23.75	22
3	8.5	12.25	18.5	15.5	32.5	30	17.25	29.25	28.5
0.5	5.5	16	10	5.75	24.25	29.5	8	25.25	20
2	5	8.5	10.75	8.5	24.5	26	8.5	22.5	17.5
3.25	9.75	15.75	26.25	19.75	33.5	39.75	19.25	21	31.25
3.25	4.25	12	7.5	13.5	24.75	27.75	7.75	18.25	19.25
1.5	6.5	10.5	13	7.5	25	25.25	12.75	20	27.5
0.5	7.25	17.5	10.25	7	17	24	11	19	12.25
2.5	10.5	22	16.25	21.25	59	44.75	9	21.5	30.75
3	8	24.75	26.75	19.5	52.25	61.5	14.75	32.25	41
3.5	14	23.5	24.25	26	50.25	59.75	10.75	24.5	37.25
3.25	6.5	21.5	22.75	14.25	45	51.5	5	21	35.5
2.75	6.5	24	20.75	17.75	42	51.25	11	29.75	31.75
3.25	9.25	20	23	19	48.75	53.5	10	26.5	37.5
4	7.5	28.5	21.75	15.75	44.75	50.75	7.5	24.75	31.25
2.5	14	26.75	30.5	13.25	44	67	9.25	24.75	31
2.25	13.5	22	22.25	16.25	38	48.5	8.25	16.25	31
4.25	12	25.75	26.25	17.25	46	50.75	8.25	20.5	31.75
3	7.75	34.5	22	9.75	46.75	52.25	7	18.75	30.75
2.75	9.5	23.75	23.75	12.75	49.75	52.25	9	18	35.25
2	5.5	29.75	19.75	9	26.5	45.75	4.5	8.25	24
2.25	7.5	24.5	21.25	12.5	54.5	60.75	10	27.75	33
4.5	14.25	24.25	25.25	15.25	47.25	50.25	12.25	36.5	38.75
2.75	11	24.5	22.5	19.5	35.25	48.75	5.75	26.75	30
1.75	7.75	41.5	23.25	16	44.25	55.75	8	19	30.5
3.25	10.5	30.75	18	12	45.5	54.75	12.75	20.75	28
3.25	13	24.5	21.5	14.25	42.25	53.25	8.5	24.5	26.25
2.75	12	24.75	25	19	51	46.5	9	38.25	27.5
3.25	11.75	35.5	27	17	56.5	44.5	5	22.75	25.5
3	16.25	21.25	25.5	21.75	83.5	50	7	26.5	22
4	6.75	16.25	22.25	19	32.5	47.5	7.5	32.75	25
1.75	15.5	22.5	27.25	23.5	54	55.25	9	33.5	25
1.25	11.5	22.75	27	19.25	46.25	53.25	13.75	39.75	33.25
2.25	7	15.25	30.25	15.75	42	45	10.25	60.75	30
3.75	12.5	19.75	28	19.25	41.25	41.75	11.25	78.5	27.25
3.25	8.5	26.75	33.5	17.5	37.75	51.75	15.25	84	23.25
3.75	15.25	24.75	32.25	18.75	45.25	41	13.5	81	29
1.5	6.75	13.25	25	17.25	31	34.75	12.75	43.75	19
2.25	3.5	15	18	15.75	29	33.25	9.5	20.25	21.75
2.25	5.25	21.25	21.75	16.5	35.5	36.5	12.5	32	26.5
3.75	10.75	21.5	34	20.75	40	34.25	10.75	47.5	32.75
3.5	20.25	30.75	35.25	24.5	47	51	14	78.5	36.5
1.75	12.25	28.5	33	17.25	36	50	12.75	39	31.5
1.75	11.25	28.25	29.75	14	58.25	52.5	23.5	59.75	44.75
1.5	22.25	23.5	33	22.5	47.5	38.25	7.25	60.5	26.75
1	9.75	17.25	29.5	18	32.25	38.25	7.25	60	23.5
2.5	13.75	30	34.5	21.5	51.75	48.25	19.75	23	31.25
3.25	13.25	20	25.25	20.5	47.5	34.75	16	24	24.25
2	9	13.5	27	14.25	26.25	20.75	10	22	29.5
1.5	6.25	8.75	23.25	15.5	34.75	22	10.25	20.75	32
0.75	10.25	12	24	19.25	36.25	29.75	11.75	19.25	26.5
1.5	9.25	12	28.25	16.75	32.75	26.75	11.75	14	22
0.75	6.25	6.25	19.25	11	33.5	24	11	17.5	20.75
3.5	11	14.75	32.75	22	42.75	52	14	18.5	22.25
3.25	9.25	13.25	27	16.25	31.75	33.25	11.5	21.75	21.5
2.5	13.5	11.75	25	23.75	28.5	36	11.75	23	24
0.5	7.25	8	18	15.25	27	32	6.75	10.5	20.75
2.5	10.75	12	15.5	18.25	30.25	32	8.75	22.25	18
1.75	11.5	15.5	29.25	15.5	37.75	42.5	16.5	18	24.5
3.25	9.5	15.5	30.75	18.25	38	42	10.75	17.75	23.25
3	12.5	13	23	15	36.25	36.75	9.5	24	17
2	8.5	18.75	20.75	15.5	48.25	42.5	14.5	11.75	28.25
2.5	8.75	13.25	30	19.25	36	42	12.5	18.5	20
1.5	12	17.5	23.25	21.75	36.25	43	13.5	15.75	23
2.25	14.75	24.75	30.75	26.25	51	33	20.75	19.5	25.5
2.75	12.75	14.75	21.25	16.25	30.75	37.25	12	18.75	26.5
0.25	13.5	15.5	24	15.5	36	37	12.25	18.25	18
2.25	12.75	18.75	31	13.75	39	38	10	21.5	21.75
2.25	15.25	23.25	34.75	26.5	39.5	30	18	29.25	26.5
3.75	12	21	23.5	15.25	37.75	35.25	8.75	29	16.75
3.75	18	25.75	33.25	25.5	44.5	37.5	10.5	23.75	27.75
4.25	15.75	19.75	29.25	22.5	44.25	43.5	17.5	29.75	30.25
2.5	18.5	21	24.5	23.75	37.25	47.25	12.75	20	27.75
4.25	18.5	17.25	27.5	17.5	36.75	34.5	15.25	19.5	24.75
1.5	12.5	17.5	30	14	35.75	29	9	26.25	20
2.25	12.25	17.75	24.5	10.5	31.5	32.75	11.75	20.5	20
4.75	17	33.75	19	18.75	45.75	47.5	6	22.25	22
4.5	23.75	23	31	25.25	41.25	50.75	12.75	42.75	26.25
5.25	30.75	34	39.75	25	39.5	35.5	20	26.75	30
2	27.75	30.5	26.25	22.5	41.5	37	11.5	36.5	21.25
2.5	26	27.25	26.5	20.5	36	41.75	19.5	30.25	22.75
3.75	16.5	25.5	28.75	19	36	43	17.25	28.75	20.5
3.5	22	25.5	32	25.5	35.25	48	13.75	52.5	33.25
3.25	19.25	28.75	37.5	20.75	45.25	29	13.25	38.75	32.25
3.75	22.25	28.25	37.75	22	37.25	36.5	16.25	43	25.5
2	20.5	29.25	31.75	20.75	35.25	41.25	14.75	48.25	21.75
2.25	16.25	17.75	21.25	19.5	29.75	42.25	8	40.75	15.75
2.25	11	13.5	20.5	19.25	19.5	31.75	9.25	24	13.5
5.5	30.5	46	36.5	26.25	56.25	46.5	13.25	46.5	30
5.5	20.75	48.25	28	24.75	64.5	43.75	9.75	41.5	20.25
1.5	5.25	31.5	17.75	20.75	27.25	35	9.75	30.5	19.75
2	9.5	22.5	15	17.25	25.75	36.5	16.75	30	22.5
0.75	4.75	23.5	16.25	11.75	30	40.25	19.5	27.75	25.25
1.75	12.5	21	15.25	11.25	26.75	32.5	16	16.5	20.25
1.25	9.75	16.25	15.75	14.25	23.75	20	17.75	18.75	15.25
1.75	9	17.75	26.25	23.5	27.75	39	32	32	26.75
0.5	2.25	20.75	15.5	7.25	26.5	26.25	8	27	17.5
0.75	4	13.75	6.5	10.25	20.75	23.5	10.5	12.5	13.5
1.25	10	21.5	11.25	6.25	32.75	39	17.25	31.5	25
2	8.75	26.75	16	6.5	29.5	26.5	20	28	22.75
1.25	7.75	13.25	17.5	20.25	29	29.5	14.5	32.5	18.75
0.75	12	17	20.5	23.5	32	44	31.75	29.25	24
1.5	9	22.5	16.25	21.5	24.5	35.25	21.5	28	28
0.5	6	12	11.75	13.75	22.5	25	12.5	24.75	15.75
1.75	8.25	21	13	10	29	26	5.75	58.5	15.25
1.25	10.25	23.25	17	7.75	24.25	22	9.75	18.75	18
1.5	6.25	14	14	13.5	30.75	26	17.5	22	23.75
1.25	6.75	11.25	13	17.25	25.75	30	15.25	23.25	18.5
2.5	7.25	17.25	12.25	11.5	21.25	17.75	12	33.75	15.75
0.75	9.75	16.75	13	28	35	39.5	33	24.25	21
1.75	14.5	20	16.25	19.5	27	29.75	27.25	20.25	20.5
4.25	16.25	28	16	20.75	37.25	30.75	11.5	47.75	21.75
2.5	5.5	16.75	13.5	15.5	43	29.25	11.25	45	18.5
0.75	4.25	14.25	12.25	27.25	29	31.75	24	24.75	23.75
1.25	8	14.5	12.75	18.25	25.75	19.5	14	17.25	18
2.25	10.75	11.25	13.75	16.75	24.5	30.25	20.75	15.75	26.25
1.5	10.25	21.5	15.25	18	24	24.25	21.25	19.5	22.25
0.5	6.5	7.5	7.75	17	27.5	29.75	18	23	22.75
2	6.25	16.5	11.25	20.25	30	28.25	14.75	27.25	17.75
0.25	8.5	16.25	12.25	12.5	17.5	20.5	10.25	21	17
0.75	3.75	11.5	8	17	31.25	26.75	13	22.75	22.5
0.75	6.25	12	21.75	22	29	38.25	29.25	18.5	19.25
1	8.5	10.5	16.75	16.25	23.25	23.25	11.25	22.5	16
1.25	5.25	7.75	9	10.25	19	24.5	11	13.5	18.5
2	12.25	29.25	20.5	10.25	22.75	28.25	17	21.75	25.25
6	28.5	48.5	33.25	29.75	60	49.75	16.75	68.25	41.25
2.5	9.25	27.75	24	19.75	39.25	35.75	13.5	60.25	35.25
0.75	5	8.5	9.75	21.5	26.75	34	18	34.75	18.75
0.75	7.75	13	14.75	24.5	33.5	31.25	19.75	27.5	22.75
1	14.75	22.5	16.5	15.5	26.75	43.5	26.25	27.5	27.5
1.5	7.75	12.25	15	11.5	26.75	33.5	16.75	21.75	16.75
1.75	6.75	10	21.25	28.25	35	42.75	27.5	25.5	26.5
1.25	8.25	24.75	15	16	22.25	31.5	12.5	13.25	23
2	9	17	11	12.5	24.5	31	15	33.25	21.25
2.25	7.25	13.75	11.25	10.5	36.25	20.5	11.5	22.25	22.25
1.5	7	18.75	12.75	14.25	22	22	12.25	9	22.25
0.75	7	15.25	13.5	25.75	22.5	36	32	25.75	25
2.75	8.75	13.5	11.75	19.25	22.5	26.5	12.25	26.25	23
0.25	8.5	15.75	10.5	11	21.5	21	11	7.25	17.75
1.75	10.75	11.75	15.75	15.25	20.75	26.25	14.75	26.25	19.5
1.75	10.5	13.5	17.25	16.25	22	41.25	23.5	18.5	22.75
0.5	9.25	21.5	10.75	9.25	15.25	21.25	10.5	13.25	14.75
0.75	4	10	6.25	7	18.25	13.75	8.75	4.75	14.25
0.75	10.25	14.75	17	22.5	19.5	32.25	12.5	31.25	19.5
2.75	7.25	15.25	12.5	15.75	24.5	36.75	20.25	24.75	27
0.5	10.75	19.25	13.75	5	15.25	23.5	8.25	26	18.25
1	5	4	7.25	14.25	29.5	26.75	14	17.5	23.75
1.25	12	18	20	12.5	22.25	15.25	12.5	15.5	17.5
1.5	9.25	13	17.5	18.25	30.75	38.5	20	22	21
1.75	3	10	10.25	12.75	18	18.75	10	21.25	21.75
1.25	6.5	14.5	12	18.25	24.75	25.25	12	26.25	23.25
1.5	8	10.25	11	8.25	44.25	28	19	23.75	35.25
2.25	10.75	15	22.75	20.25	29.5	33.25	20.75	17.5	21.5
1.75	4	8.25	8.25	9.5	16	20.75	12.5	16.75	19
0.5	7.75	9.75	11.5	12.75	24.25	27	10.25	18.75	18.75
1.75	5.25	12.25	18.75	25	31.75	39.5	26.25	27.25	28
1.75	2.5	9.5	11.25	9	18	24.25	12.5	10	21.25
0.75	7	18.25	9.25	8.5	15	20	9.5	22.25	19.25
2	7.25	15.75	12.75	19.5	25.25	33.75	21.75	27.75	28.5
4	15.25	16.5	23.75	18.75	27.25	26.75	19.25	11	26.75
2	16.5	14.5	12.5	10.75	15.25	17.75	10.25	15	16.75
0.25	2.5	5.5	7	9.25	22.25	22.25	5.5	29.5	18.25
1	5	21.5	13.75	11.5	26.25	30	18.25	22	28.75
0.75	8	8.5	7.5	14.25	21.5	19.5	9.75	20.75	20.25
1.25	8	13.25	15.5	14	26.25	23	15.75	17.75	24
2.25	10.25	14.75	24.25	26.75	35.75	43.5	30.25	28.25	29
1.5	12	20.25	16.75	10	20.25	21.25	11.25	33	24.25
2.75	10	17.5	17.75	8.75	30	27	20.25	18	23
1.5	8.25	15.5	12.75	13	19.25	19.25	15.5	8.25	17.5
1.5	3.75	12.75	7	12	17.25	15	14.75	13	18
1.5	4.25	9.5	10	15.5	28.25	21.75	15.5	15.25	28.25
3.25	5	10.5	13.5	16.5	28	34	17	15	19
1	12	19	17	7.25	22.25	25	12.25	28.75	20.5
1.25	6.5	13	9.25	9.5	24.75	25.75	11	16.5	19.25
1.5	10.75	11.75	15.25	13.25	24.75	24.5	17	19.5	24.5
5	7	11.5	20	24.25	33.25	36.75	24	32.25	30.75
3.75	12.25	19.25	19.5	16.5	30.25	30	22.75	18.5	28
1.75	9	13.25	19.25	11.25	20	25	15	17	24
2	9.5	12	11.25	10.5	19.5	24.5	8	21.75	16.5
2.25	4.25	7.5	15	17.25	22.75	19.75	17.25	15	20.75
1	5.5	11	5.75	7.75	34.25	19.5	9.5	23	20.25
1.75	13.25	15.75	18	12.75	40.5	24.75	15	18.5	20
3	9.25	12.75	13.75	13.25	21	14.5	12	16.75	21
1.25	9	20.5	17.25	16.5	29.5	25.75	19.75	11.25	20.25
1	8.75	15.25	13.5	11.75	25.5	21.25	13	17.5	21.5
0.5	4.25	14.25	8.25	8.25	13	16.5	9	15.75	16.5
1.5	7	10.5	11.75	9	25.5	26.5	12.25	27.25	26.25
4.5	10	16.5	19.75	18.75	29	30	22.25	14.5	20.25
4	7.25	11.75	13.25	9.75	14	17.75	9.25	15	15.75
1.25	7.75	13	9.75	14.5	23.5	31	10.5	23.75	21
2	11.75	10.25	26.25	17.5	24.25	28.5	15.5	13.75	20
1.5	6.25	6.75	11	8.25	23	27.75	9.75	21.75	22.25
0.75	7.75	14.25	11.5	6.25	17	12	7	9.75	14
1.75	5.5	17.75	15.5	21	26.25	33.25	13	30	25.25
3.5	4.25	7	21.25	18	33.5	35.5	25.75	11.5	30.25
3	7	15.25	13.5	12.75	18	24.5	13.75	17.25	20.75
0.75	6.25	18.5	11.75	11.5	22	27.25	14.25	21.25	21.25
2.25	10.25	15.25	15	14.75	25.75	30.75	9.75	32.5	25.75
0.5	2.5	10.75	9.5	10.75	19.5	23.5	13	18.75	25.75
0.5	5.5	7.5	8.5	7.5	23	24.75	11	18.5	21.5
1.25	5	10.5	9.25	9.5	22	21.25	9.25	14	17
2.5	5	10.75	8.5	9.75	15.25	21	12.25	12.25	18.5
6	15	20.25	28.75	15.25	30.75	31	27.25	18.25	24.5
1.25	11.5	11.5	11.5	13	28.5	28	15	19.75	27
1	6.75	19	9.25	4.25	17.75	24.25	8.75	14.25	17.5
4.5	5.25	12.25	8.75	8.75	24	32.5	16.75	13.25	25.5
3.5	9	13.5	13.5	13.75	26.25	32.25	17.75	24.75	24.75
1.5	7.5	11	12.25	14	25.75	24	14.25	18.5	19.25
9	36.75	43.25	41.75	23.5	65	52.5	28.25	58.75	47.5
5.25	33.5	43.25	38.5	20.75	92.75	52.75	21.5	95.75	44.25
3.25	18.5	30.25	24.5	33.25	61.75	50.25	11.25	56.75	32.25
1	2.75	6	11	14.25	24.5	33	9	21.75	19.25
0.5	3	7.5	9	14.25	26.25	31	9.75	24	22.75
1.25	4	10.75	9.25	22.75	25.75	19.5	11.75	21.5	21.25
1.5	7.25	23.25	11.75	13	28	26.75	16.5	21.25	23.5
1.5	6.25	11.5	10.25	11.25	27.75	27	11.5	21	21.75
4	8.75	18	9	7.5	27.25	31	9.75	13.5	20.25
1.75	15.25	19.5	23	25	33.5	33.5	28.75	30.25	27.5
3.75	7.5	10.5	12.75	11.75	26	27.25	14.25	9.5	19.5
1.5	8	14	8.5	8.25	25.5	28.25	10.5	25.5	26
1.5	4.5	13.75	13.5	15	27	44.75	13.5	33.25	23.5
2.25	3.75	6.5	10.75	19.25	26	29.25	16.75	26.5	19.75
0.75	7.25	14.75	14.5	9.25	19.75	20	10	26.5	18.5
4.25	18	10.25	14	14.5	25.75	31.25	16.75	16	27
1.5	9	13.75	28.25	19.25	33.5	37	20.75	13.5	27.5
1	4.75	9.25	11.75	11	18.5	25.75	9.25	17.75	16.75
1.5	4.75	8	11.75	14.25	20.75	20.5	12.5	13.5	21.75
3	12.75	22.25	19	10.75	28.25	33.75	16.75	18.75	26
3.75	11.75	14.25	17.25	9.5	30.25	25.5	18.25	11.25	25.5
1	4.75	7	8.25	12.25	26.5	25.5	10	15.25	21.5
1.5	6.75	11.5	10.25	17	23	28.5	11.25	30.75	21.25
2	8.5	25.25	18	10	26.5	26.75	17.75	25.75	22.5
2.75	6.5	11.75	13.25	10	25.25	32.25	14	24.75	21
0.5	4.75	10.25	9.75	7.25	40.5	28.75	10.75	34	23.25
3	5.25	7.25	18.75	16	24.75	26.25	18	13.25	15
0.5	7.5	15.5	7.25	11.25	20.75	22.75	12.5	15.25	16.5
1.75	9.5	11	13.25	13.75	20.25	25.25	11.5	9.5	19.75
2.5	11.5	15	25.5	11.5	21.75	26.75	11.75	24.75	17.75
0.5	4	9.5	5.75	11	23.25	23.75	11.25	19.75	21
1.75	3.75	8.75	14	24.75	35.5	35.25	21.25	26.5	29.5
0.25	5.5	8	7.25	8.5	22.25	26.75	7.75	18.5	18
3.75	14.5	21	22.25	11.25	28	38.75	23.5	15.25	25.5
0.75	6.25	19	16.75	7	23.5	24.25	10.5	25	20
1.75	8.5	10.25	13	13.5	30.25	30.5	13.75	20.5	24.25
3.5	6.5	9.75	17.5	21.75	32.75	42.75	19.5	30	27
1.5	7	14	18.75	12	25.75	29.75	13.25	21.25	22.5
1.25	6.75	14.75	15	11.5	24	31.75	17	22.75	24.75
3.5	7	13	21.75	15	32.25	36.75	20.5	14.75	31.25
0.75	4	11.5	9	11.25	15.75	22.25	7	28.75	15.75
1	5	14	11.75	6.5	20.25	25.25	9.5	18.75	16.25
1.5	3.25	9	9	7.75	23.25	23.5	10.25	19.25	16.75
1.5	9.5	13	15.5	15.5	24.5	39	15.25	27	27.25
1.25	7	12	15	9.25	33	37.25	18.5	19.25	28.5
1.75	7.25	12	18.75	14.75	34	28.75	14.25	19.75	25.25
1	4.75	11	10	14.25	20.5	26	14	24	19.5
2	7	16.5	12.25	8	21	27.5	14.75	24.25	23.5
3.75	4	10.25	6.75	7.25	21.25	25.25	11	13.75	20.25
2.5	6	10.25	11	14.5	42.5	20.25	10.25	20	24
1.75	3.25	11.75	11.25	23.25	61	30.25	7.5	26	24
1.25	2.5	10.25	6.5	14	29.25	35.25	14.75	18.25	16
1.75	5	10.25	9	16.25	32.25	31.25	10.25	30.25	20
3.5	11.5	14.75	24.25	22.5	40	31.5	15.25	16.75	23.75
2	3.5	11	9.75	18.5	28	30.25	19.5	23	23.75
0.5	5.25	24.25	14.5	6.25	18.25	25.25	10	20.25	18
1.25	3.5	6.5	11	12.25	32.25	24.75	18	10.75	24.5
1.25	6.25	10.75	17	23	36.5	32	21.5	14.25	30
1	4.25	10	7.75	15	19.75	21.5	7.25	19.75	20
1.5	6	14.25	11.25	7	29.5	23.25	8.75	13.5	18.25
1	7.25	15	7.25	6.5	22.75	23.75	9.75	10.25	17
1	9.5	14.5	15.75	18.5	28.75	21.5	18.75	8	19
2	3.5	14.25	10.25	14.5	23.5	25	12.25	29.25	19.25
0.5	2.25	10.5	6.25	7	30.25	24.25	6	15.5	14
1	4.75	11.25	9.5	7.25	23.25	26	6.5	33	18.75
3.5	7.5	13.25	6	12.5	22.5	18	9.5	7.75	17.25
3.75	4.75	10	16.5	15.75	32.75	40.75	21	14	27.75
3	6	11.25	10.25	9.75	31.5	26.75	10.5	16.75	18
0.5	7	12.25	10.5	10	30.5	27.25	13	33.75	19.25
0.25	3.75	6.5	18.25	23	32	33.25	21.75	21	22.5
1.25	9.25	15.5	16	13	21.25	34	13.5	32.25	21
0	4.5	11.25	10.5	10	24	20	9.75	17	19
1.5	7.25	14.75	12	6.5	19.5	26.5	12	23.5	24.5
1.5	9.25	12.25	12.5	11.25	24	25	13.75	15.25	17.75
1	4.5	8.75	10	8.25	19	19.25	8.5	6	18.5
0.75	3.5	8.75	9.25	13	22	20.75	9.75	19.25	12.75
2.5	4.5	9.25	11	19	31.5	28.75	13.25	21.75	20.5
2.25	6.5	6	9.25	10	23.75	18	8	12.5	16.5
2.5	4.75	9.75	12	9	24.75	27.25	14.75	21	20.25
2.25	5	12.75	11.25	18.5	30	26.5	14	23.75	19.5
4	6.25	10.25	16	13.5	29	37.75	16.5	27	26.25
2	7.25	12.25	15.5	12.25	27.75	25.75	16.5	16.5	17.75
1.5	4.75	10.25	8.75	10.25	26.5	27.5	11.75	25.75	22.5
1	7.75	13.25	26.75	11.75	39	29.25	18.75	20	28
1	6.75	9	10	13	31.75	21.25	11	22	14.5
2.5	2.5	6.75	8.25	12.5	24.5	21.5	11	16.75	13.5
3.75	11.75	17.25	21.75	20	52.75	39	24.25	28	27.75
2	3.75	12.75	9	8.25	21	19.5	9.5	9.25	13
0	6.75	19.75	11.5	7.25	18.75	22.5	9.5	31	14
2	8.25	8	11.5	13	21.5	25	12.5	8.5	19
0	6.25	8.25	8	8.75	30.25	27.25	7.5	21.75	18
2.75	8	6.75	19.25	14	29.75	28.25	13.75	8.25	26.5
0.5	5	13	6.75	11.75	24	26	9	19.75	18.5
1	7.5	11	13.75	7.25	26.5	29.25	12.5	37.5	27.5
0.5	6	10.5	12.5	10.5	27.75	38.5	22.75	21	26.75
1.25	7.5	12	10.75	7.25	23.25	25.5	10	16.75	16.5
2	9.25	7.25	12	9.5	29.75	26	13.5	17.5	21.5
0.25	4.75	10	7.5	6.75	25.75	19.25	10.75	16.5	20
0.75	2.25	5.5	4.75	6.25	16.5	19.75	9.5	15.25	16.5
2.5	5.25	11	14.75	14.25	32	25.5	15.75	11	17.75
1.25	5	11.25	17.25	15.25	27	32	19.25	17	21.25
1.25	9.75	7.5	5.5	7.5	21.25	19.25	4	14.75	14
1.75	9.75	14	14.5	11.5	70	32.25	13.25	34.75	23.75
1.5	10	22.25	12.75	15.25	68.5	37	6.75	37	27.75
1.25	6.75	12.5	9.75	13.75	35.25	35	9.25	21.25	23.5
1	5.25	10.5	10.25	5.5	19.5	19.5	9	14.25	14.25
1.5	5.75	8.75	11.25	13.5	26.5	23.5	11	23.5	20
4	5.5	15.25	14.5	18.75	28.5	29.5	12.5	20	21
1	9	11.75	15.5	9	23	20.75	11.75	14.25	16
0.5	11.75	13.5	24.5	13.5	31.75	35.5	18.5	20.75	26.25
1.75	5	3.75	22.5	22.5	34.5	35.75	19	16	21.25
1.5	8.25	13.75	7.25	4.75	18.25	12.25	4.5	12.5	13.75
1.5	11.5	15.5	11.5	9	28.5	33	14.75	25.5	24.5
1	6.75	10.25	12.75	8.5	30	30.75	21.5	25.5	21.5
1.75	7.5	12.5	14	9.5	21.5	24	9	14.5	23.5
1	4	7.75	9	10.25	23.5	19.25	10.25	19.5	16.75
1.25	4.25	7	10.5	18	23	23.25	12	13.25	11.75
2.75	6.25	15.25	27.5	23.5	32.75	27	18.5	15	26.25
2	6.25	8.5	10.25	9	15.5	14.25	7.5	15.25	15.25
1.75	4.5	17.25	11	12.75	24.5	19	12.5	15.5	19.75
1.5	3.5	7	6.5	10.25	24	24.75	8.5	20	22
1.75	5.25	8.75	11	13	34	20	16	29.25	21.25
1.25	6.25	5.75	10.75	5.75	18	20.25	12	22	18
2	4.5	10.75	14.75	11	23.25	33	18.5	19.75	20
0	7.25	8.25	11.75	6.75	26.75	27	11.25	18.25	16.75
1	4.75	7.75	9.25	10.5	18.5	15.25	12.25	12.25	11.75
0.75	3.5	12.25	10	9.25	21.25	21.5	8.75	13.75	19.75
2	8	11.75	11.75	12	22	20.25	13.25	16.75	18.25
1	4	10.5	8.25	10.25	25	22	11	21.25	22
0.75	4.75	14.5	8.75	5	23	24.5	8.75	13	18.5
3	7.25	11.75	20.25	18.5	34.25	31.25	18.5	15.75	32.25
0.5	10.25	19.5	11.25	5.5	19.75	17.75	8.5	15	17.5
1.25	3.25	4.75	7.5	6.5	20.75	20.25	6.5	20.75	21.5
0	2.25	6.75	5.25	10.5	22	17	7.25	14	20.25
0.75	2.25	7.25	4.5	10.5	16	19.5	9.5	14.5	14.75
1.75	9	7.75	11.75	18.25	23.5	26.75	11.75	34.75	19.25
1.25	9	12	15	8.5	24.25	26.75	13.75	17	19.75
3.25	5.25	8.25	21.5	18.25	32.5	34.5	19.25	17	27
3.25	5.5	11.25	15	14	30	26	16.75	22.5	23.75
0.25	3.5	10.5	10.25	9.5	21.5	22.5	11.25	17.75	21.5
1.75	5.25	10.25	13.75	9	20.5	22.75	9.25	16.5	21.5
2.25	3.25	11.75	9.5	11.25	18.75	15.25	13.75	7.25	16.5
1	3.25	11.75	9.75	6.5	21	23	8.75	14.5	18
0.5	3.75	4	5.75	9.5	26.75	23.25	4.5	23.5	17.5
1.25	9	13.75	18	11.75	21.5	16.75	12.75	8.75	21
1.5	2	5.75	8.5	11.25	25.25	27.25	11.25	10.5	19
1.75	6.25	7.75	12	15.5	22.25	20.5	8.5	14	18.5
0.5	7.5	12.25	15	6	28.25	25.5	10.25	20	21.75
3.25	10.25	11	16.5	10.75	22.25	31	12.75	11.5	15.5
2.5	4	11.75	16.5	10	33	29.5	14.75	20.25	29
1.75	8	15.5	17	14.25	27	27.75	14	35.75	24.5
3.25	9.5	11.5	23	15.75	31.25	23	18.25	14.75	22.25
0.75	5.5	9	15.75	10	27.5	28.5	15.25	20.25	25.25
2.75	8.5	16	15.75	10.75	23.75	29	14.5	21	25.5
1.5	9.25	14	13.75	8.25	25	26.75	14.5	31	20
3.75	6.25	7.25	15.5	11.25	29.25	33.5	17.25	22.25	30.25
1.5	7.25	9.25	12.5	12.5	21.5	26	10	26.75	21.25
1.25	5.5	8	11.75	8.5	29	30	11.75	15.75	28.25
0.25	5.5	7	13	8.5	25.5	25.75	9.25	22.75	29.5
0.75	11	16.25	15.25	17.75	45	24	6.25	51.5	29.75
1.75	3.25	10.75	9.75	11.5	40.5	31.25	11.5	26.75	33.75
0.75	3.5	6	6.75	12.25	39.75	30.5	12.25	14.5	21
1.5	11.75	12.25	9.75	14.5	22.5	31.25	5	35	21.25
0.75	5.5	12	11.25	13.75	35	25.5	13	20.25	29.5
3.25	13.75	20	20	22.5	35.25	33.25	19.25	17	17.75
1.25	6	6.75	8.75	6.75	20.25	21.5	4	23.25	17.25
2	5.75	12	8	11	20.25	17.25	9.75	7.75	21
1.5	6.5	11.75	13.75	8.75	22.75	29.75	11.5	23.5	23.25
2.75	2.75	4.25	11.75	11.25	31	27.75	15.25	19.75	26.25
5	9.75	18.5	28.5	19.25	38.5	33.5	23.25	25	26
1.75	8.75	21	13	6.25	21.25	22.5	7.75	18	23
0.75	4	11.5	9.25	13.5	57.75	18.75	8.5	30.75	32
1.5	4	9	9.75	12.75	45.5	23.25	9.25	24.5	26
1	7	16.5	26.5	20	35	41.5	20.75	19	30.5
0.75	3.5	6.5	9.25	13.25	21.75	20.5	11.25	14.5	16
2.75	11.25	25	13.75	11.5	25.75	31.75	12.5	26.5	27
2.25	5.75	13.25	10	8.25	22	28.75	10	13.5	20
2.25	4	12.25	8.75	9	23	21.25	10.25	17	22.75
3.25	16.5	22	23.25	9.5	21.5	30.5	11.25	33.25	25.25
0.75	6.25	7.75	13	9.25	25.5	23.5	12	20.5	20.5
1.75	5.75	7.5	8.75	8.75	21.75	16.25	8.5	30.25	17.5
3.75	4	7.25	12.25	20	31.5	34.5	20	26	28.25
1.5	3.75	9	12.5	12.25	66.75	21	10.25	26.75	31.5
1.75	9.5	11.75	9.25	8.75	29	18.25	5.5	15	15.25
1.75	6.75	26	7.75	5.25	22.75	25	9.5	16.25	15.25
1.75	5	13.75	11	6.75	29.25	28.75	12.75	22.5	17.75
0	4.75	7.25	7.75	9	19.5	22	7.5	24.5	21
2.25	6.25	12.75	16.25	14	28.75	34	17.25	20.75	24.5
1.75	5.5	13.25	21.25	20	28.25	39.5	17	16.25	28
2.25	10.75	10	11	11	20	25.25	12.25	20.75	18
0.25	3.25	8.25	12.5	10.75	28.25	22.5	19.75	14	25.5
3.75	10.25	18.25	24.25	11	28.75	35	15.75	21.5	24.25
4	9.5	12	15.5	7.25	23.75	34	19.5	27.75	23
1.5	3.75	14.75	12.25	12	24	25.5	11.25	17.25	20
1.5	5.75	6.5	14	17.75	29.25	35	14.5	37.5	26.25
1.75	6	5.5	14.25	9.25	29.25	35.75	10.25	19.5	29.25
6.5	3.75	9.75	12.75	16	32.25	32	14.25	13	28.5
2.5	4	7.5	6.75	10.25	12.25	14	3.25	21.75	17.25
1.25	5.25	10.5	10.75	9.75	38	29.25	6.75	22.75	28.25
1	1.75	4.5	4.25	10.5	20.5	25.75	9.5	10	24.25
1.5	5.5	12.75	11.5	16.5	67.75	25.75	12.5	31.5	24.75
2	5.5	11.75	17.5	23.25	34	38.5	24	17.25	29.25
0.5	3.75	8.75	15.5	24	29	29	16	21.25	24
4.25	6.75	10	9.75	10.5	19.25	23.75	9.5	14.25	18.25
0.25	7.75	17.25	7.75	4	15.25	25.25	8.75	28.25	17
1	2.5	14	10	6.75	21	17.25	11.5	16.5	17.75
2.25	3	12.25	5.5	9.75	24	19	9.75	6.25	19.75
1.75	5.5	5.25	13.5	10	30.5	35.5	16.25	29.5	21.5
0.5	6.25	10.75	10.75	8	22.75	22.25	9.75	29.25	25.25
3.5	11.75	11.75	18.75	11	34	38.75	24.25	22.75	29.25
3.25	6.75	14	14.5	12.75	21.5	25.5	16.25	17.5	22
2	2.25	7.5	10.75	13.5	23.5	25.75	13.75	13.5	22.25
1	7.75	11	25.25	14.5	31.75	31.75	20.5	26.25	28.5
1.5	4.25	6.75	12.25	12.5	27.75	32.25	13.75	22.5	25.5
3.75	11.25	17	16.75	19	29.25	31.75	22	25.25	28
1.25	7	19.25	19.25	9.25	33.25	27.75	17.25	23.25	32.25
2.25	4.75	6.5	9.75	13.75	23	31.25	12	20.5	28.25
2.75	12.25	12.25	15.75	15	28.5	35.5	14.75	34.75	31.75
2	6.75	9.25	17	13.25	28.5	30.25	18.5	25	32
2	6.25	16.5	22	19	32	39.25	21.25	16.25	29.5
3	10.75	13.5	15	20.75	29	35.75	17.5	29.5	32.25
0.75	9.75	16.75	22.75	15.75	29	24.25	13.75	27.5	34.75
1.25	16.5	17.75	29	16.5	31.25	28.25	11.75	25.75	37
1.5	9.75	13	20.25	12.75	27	33.25	9.5	31.5	28.25
1	5.5	10.5	15.5	17.75	23.5	31.25	12.25	27.75	31.25
1	6.25	11	14	12.25	27.75	36.25	13.25	26.5	28.25
1	4.75	11	15	15	27.25	39.5	14.5	17.5	30.75
1.25	11.5	11	18.75	11.5	27.25	26.5	13	28.5	23.75
3.5	16.75	12	38.5	15	36	47.25	25	29	40.25
4.25	13.25	18	25.75	15.25	28.75	38	15	24.75	34
1	19.75	23.75	26.5	10.75	37.5	32.5	15.5	35.5	36.25
8	17.75	24.75	49.5	17	36.25	37.25	29.75	37.5	47.5
2.25	4.25	10.75	14.75	17.5	31	41.25	15	25.75	30
0.5	5	9.25	10.75	15.5	21.5	29.5	8.75	37	24.5
2	11.5	16.25	20	10.75	23.75	34	12.5	10.5	23
2	12.25	28.75	33.75	7.75	23.75	33	13.5	27.75	29
1.5	10.25	21.75	33	9.75	27.25	40.25	14.25	39	29
1.5	7	14.25	21.5	12.25	26.25	35.75	15.75	21.5	34
4.25	9.25	22	26	16	25.5	40	13.25	29.25	32
3	3	9.75	19.5	14.75	31.25	38	17.25	38.5	35.25
3.25	6	14.5	20.25	11.25	22.5	39	22.75	24.5	31
4	9	20	38.25	10.5	27.75	35	19.5	51.5	27.75
3.5	9.75	22.75	33.25	12.75	28	34.5	23.25	43.25	36
4.75	12.5	28	31	23	35.75	35.25	15.25	39	36.5
2	15.5	20	31.25	16	28.25	34.75	19.25	46	34.5
2.75	5.75	6	13.5	19	19.75	34.75	11.75	52.5	28
1.75	3.5	3	8.75	21.5	17.25	21.5	9.75	38.5	27.5
1.25	4.5	8.25	11.75	13.75	26	25.5	8.75	37.25	29.75
3.5	10.5	18	12.5	17.5	48.25	35.25	5.25	36	28.5
6.25	19	24.25	23.75	19.25	88	45.5	9.75	47.75	29.5
3.5	12.5	19	26.5	23.5	59.25	48.5	11	25.75	31.25
4.75	14.5	24.75	26.75	18.25	67.5	43.5	9.25	36	37
3	12	20	26.75	22.5	64.5	37.75	8.25	26.25	31.25
1.25	15	35	21.75	22.25	71.75	42.25	9.5	27	31
5.5	17.5	41	27.25	18.5	81	35.5	14.5	35	35.5
3.25	13.5	18.75	27.25	24.5	34.25	38.25	19.25	38.25	40.75
4.75	14	28.75	28.5	27	38.75	35.5	17	24.25	42.25
5.75	14.25	23.75	33	22.5	35.5	36	15.25	35	43.75
7.25	20.75	25.25	41.25	12.5	39.75	71.75	32.25	26.5	31
4.25	17	24.5	33	18.25	30.5	64	22.75	27.5	40
5.5	14.25	21	35.25	19.5	34	52.25	15.25	20.75	37.5
5.75	20.5	29.75	36.25	19.75	48.75	48.5	25	32.25	35
4	17.75	27.5	28.75	16.25	43	41.75	19	26.75	32.25
4	14.5	24.75	35	18.25	51.5	47.25	22.5	30	35
4.75	20.75	28.75	36.75	22.5	43	43	19.75	38.75	40.75
5	12.75	29.75	31.5	15.25	30.75	42.5	15.5	20	29
3.75	13.5	28.75	36	12	41.25	40	17.5	26.25	35.5
5.75	11.5	26.75	40.25	12.5	31.5	40.75	15.75	27.75	30
4	15.5	25.5	34	19.75	39	32.5	16.25	23.75	30.75
8.25	38.75	54.5	57	31.5	65.5	60.25	39.75	63.25	44.5
9	28.5	37.25	51.5	33.75	51.5	56	25.75	45.75	48
4	20.5	29.75	27.5	14.75	42.25	35.75	16.5	22.75	35
5	16.5	29.75	31.5	24	33	40	16	27	35.5
5.5	25.5	40	42.25	25.75	44.5	42	26	33	37.75
4.25	18.5	25	33.5	20.25	40	43.25	19.25	33	39.25
5	24	38.25	50	19.25	51.5	42.25	27	41.75	31
3.75	34.75	31	33.75	13.75	53.75	42	14.75	40.5	34
4.25	23.25	34.25	39	12.75	38.75	38.5	14.5	35.5	36.5
4.5	20.5	30.5	49	27.5	44.75	35.75	19.5	30.5	38.25
5.25	18.5	35.5	36	21	47	37.75	19	36	33.25
3.75	22.75	44.25	32.25	18.5	77	29.75	15.25	38	31.25
4	22	30	34.25	20.25	61	33.25	18.25	36.75	27.25
3.75	29.75	34.25	54.25	16.75	39.25	41.25	15.25	68.5	37.5
1.75	17	22.5	28.5	27	33	38	13	64.75	30.75
6.75	19.5	30.5	45	32.5	50.75	42.75	19	73.5	38
4.5	26	35.75	49.25	18.25	47.5	46.75	21	53.75	35.25
5	27.25	33.25	41	24.75	43	39	28	32	44
4.25	23.75	28.5	33.5	16.25	42.5	38.75	24.25	43.75	28.75
5.5	18.75	33	37	19.5	44	46.75	27.5	47	38
4.75	19.75	34	39.5	24.25	48.5	42.75	20.5	45	34
3.25	18.75	46.25	34.25	21.25	59.75	33.25	13.5	61.5	35.5
2	7.25	21.5	32.25	18.75	43	35.25	15	52.25	29
3	20.5	31	29.25	20	50	42	13.25	43.25	28.25
3.5	27	51.5	45	20.75	91.5	45.75	8.25	72.75	32.75
4.25	21	40.25	40.25	25.5	50.25	52.75	16.25	35	32
5.25	20.25	32.25	37.5	23.75	53.25	41.5	11.25	43.25	34.25
6.5	39.25	49	51.75	18	45.25	43	14.75	34.25	33.25
4.25	15.75	29.75	35.25	21.25	55.25	38.75	16.25	36.75	33.5
8.25	28	24.5	36	20.75	60.5	37.75	12	36.75	31.25
4.25	18.25	24.25	36.5	19.75	49	45	15.75	30.75	31
1.25	16	27.5	37.5	25.75	38	34.75	18.75	28.25	32.25
3.25	21.25	30	33.75	25	58	41.5	16	43.25	37.25
3.25	25.25	41.5	40.25	26.25	90.5	39.5	21.5	53.25	34.25
2.25	18.5	32	37.5	24.25	40.5	39.5	16	37.5	24.25
7.5	49.75	60.5	72	20.75	73.5	46	37	41.75	31.75
10	48.75	54.25	60.75	20	51.25	43.75	38.75	29.5	25.75
3.25	22.75	40.25	33.25	27.5	38.25	46.25	18.5	26.5	21.5
4.25	27.75	50	31	21.75	34	38	17.25	45	34.25
4.25	27.25	55	36.25	24	40	35	17.5	42	27.25
6.5	18.25	34.5	34.5	26.25	48.75	33	21.75	30.75	34.75
6	23.75	47	50.25	25.25	49	35	25.75	34.75	40.75
4.25	17.5	33.5	43.5	27.25	57.5	31	20.25	50.25	31.25
1.25	11.25	24.5	19.25	18.5	42.25	23.25	16.25	45.75	17.25
3.25	12.75	23.75	22.75	16	46.75	24	15.5	38.5	23
2.25	11	20.5	25.5	17.25	54.75	21.5	17.75	29.25	28.75
2.25	18.5	26	22	18.5	49.5	21.75	14.25	23.5	17.5
2.25	9.75	19.75	23.75	13.5	51.5	20.75	23.75	32.5	24.75
2	16.75	30	24.75	13.75	64.5	22.25	13.75	28	28
0.75	14	27	23.75	14.25	51.75	21	19.5	36.25	18.5
1.5	9	17.75	23	14.5	46	22.5	19.5	24.5	21.25
1.75	15	19.5	20.5	17	50.25	21.75	24.5	26	21.5
2	19.5	25.25	19.75	14.5	61.75	19.5	15.25	29.75	25.5
2.5	13.75	27.25	16.25	13.5	34.5	24.75	25.75	32.75	22.75
1	12.75	24.5	18	12.5	43.75	20.25	15.25	18.5	21.5
2.5	10.25	19.25	18	15.5	39.5	30	23.25	22.75	24.75
1	9.5	28.75	18.25	12.25	32.75	18.75	15.75	17	22.25
2.25	16	24.25	22.25	15.5	62.25	18.75	18.25	21.75	27.5
2	9.75	22.25	18.25	16.5	35	19.5	21	28.25	23.5
2.5	12.75	21	20	19.75	28.75	22	16.75	25.75	21
2	17.75	20.5	18.5	13.5	60.5	19.5	15	18.75	16.75
2.5	20.75	41	26.5	16.5	80.25	24.5	28	54.5	33
1.75	10	19.75	17	16	24	39	30.75	17	21.5
1.5	15.5	26.25	18.5	10.25	33.75	25.75	14.75	24.25	26.75
1.5	12.5	19.75	20.75	14.75	39.75	26.75	28.25	22.25	27
2.5	12	20.5	30.25	32	29.5	35.5	30.5	28.25	26
2.5	7.25	12.75	19.5	11.75	14.75	18.5	19.25	19.25	21.25
2.5	12.5	23.75	20.75	15.25	19.25	25.75	21.25	22.25	27.5
1.75	8	20.25	19.25	12	33	24.5	25.5	24.5	24.75
1.25	7	11	14.5	18.5	35	24.25	27.75	14	24
1.75	10.75	18.25	24	21.75	27	28	24.25	15.75	20.75
1.5	5.5	11.75	13.75	15.5	28.25	42	28	22.75	26.75
0.5	3.75	7.75	9.75	9.25	20.25	19.5	18.25	13	16.5
3.75	12.25	26.75	22	23.5	21.5	33.25	40.75	18.25	23.75
1.5	5.25	12.75	16.5	19.5	22.75	27.5	18.75	18	19.75
2.25	11.5	22.75	11.5	15.25	23.25	26.5	19.25	18.25	19.5
1.5	6.5	16	15.25	19	20.75	25.5	32.75	16	27
1.5	8.75	13.5	26.5	21.25	27.25	29.75	38.75	17.75	30
1	12	25.5	11.75	16.75	28.75	20.75	13.25	24.25	21.5
1	4.75	14.5	13	12.25	16.75	27.5	16.5	19.25	28.25
1.25	7.5	16.25	12	14	22	32	19.5	22	26.5
1.25	2.75	9.25	10.5	18	21.25	22.5	19.25	14.5	18.5
1.5	9.75	17.75	20	34.25	27.5	29.75	27	19.5	24.5
2.75	11.75	13	11.25	11.75	15	27	21.75	19	19.75
3.25	12.75	19.5	11.5	7	18.5	27.5	16.75	31.75	20
2.5	18.25	23.25	25	19	24.75	23.25	25.75	15.5	28.25
0.75	8.5	13	6	10	19.75	25	18.75	17	20.75
2.5	9.25	15	20.75	29	20.5	22	21.75	27.75	25.75
3	6.25	12.25	17.75	20	32	35.25	28	23	24
1.75	9.75	13.5	23.25	18.75	28.5	34.25	24.75	22	25.25
1.5	6.25	17.5	14.5	15.25	17	31.75	17	20.25	20
2	8	20.25	10	7.5	17	17.25	11.5	10	21
1.25	3	20.5	8.5	9.5	21.5	19	14	20	20.75
3.5	7.5	13.75	13	13.5	42.25	23.75	23.5	26.25	24.75
2.25	10.75	18.5	16.5	19.25	37.25	26.25	38.5	10.5	30.25
1.5	12.25	22	27.25	13.75	18.5	24	24.5	15	14.75
1.75	7	16.25	14.75	8.75	20	21.5	12.25	17	18.25
0.25	10.75	11.75	8.25	10	19.75	20.5	13.75	13	21
2	11.5	18.75	25	20.25	21.25	29	27.25	25	27.25
3.5	4.75	10.25	19.25	24.25	21.5	38.5	28.75	24.5	32.75
3	9.75	18	13.75	14.5	22.75	26	16.5	22.5	22.25
1.75	7.25	15.75	18	20	18.25	24.75	18	27.5	30
2.5	13	14.25	27.5	17.5	22.75	27.5	30.75	14.5	26.25
2.75	10.75	19.5	27	23	23.25	27	16	26.5	27.5
1.5	10.5	12	20.25	13	27.25	29.5	20	21.75	32.25
1.75	7	16	20	16	27	26.25	25.75	17	25.25
2.25	10.5	19.25	32.5	18.75	25.5	33.5	23.75	21.5	28.75
2.75	4.25	13	13.75	13.25	15.5	21.25	17.75	8.5	21
2	6.25	15.75	14.75	14.25	19.25	16.5	18.25	18.5	21.75
2	14	22.75	24.25	12.5	18.25	30.25	16.75	28	26
3	11.75	9.5	24	18.25	30.75	29	27.5	19.5	22.75
2.25	12.25	14.75	23.25	17.5	19.5	24.75	19	21	26.75
2.25	8	20.75	14.25	8.5	19.75	20.5	16.25	17.25	29.5
1.25	10.5	19.75	9.75	7.75	30.5	24	19.25	21	24.75
2.5	5.75	14.5	14	14.25	22.25	22.75	19.25	24	22
1.25	4.75	10.25	14.5	16	22.5	19.75	17	19.5	21
1.75	14.5	20	14	15.25	19.75	17.5	16.5	12	16.25
2.5	11	17.25	13	14.75	17.75	23	16.25	19	25.5
1.5	9.5	16.25	14.75	13.5	21.5	18.75	15.75	29.5	25.5
2.75	11.5	19.25	24.75	19.75	32	32.5	24.75	22.25	30
2.75	4.25	8.25	12.5	8.25	21.25	18.75	19	16.5	27
1.75	10	19	28.75	21.25	26.5	28.75	24.75	17.5	21
1.5	11.5	18	11.5	9.25	13.5	20.5	14	8.25	20.25
1	7.75	12.25	15	12.25	22.25	21.75	17	26	27.75
3	5	10.75	23	18.25	22.75	31	21.5	16.25	26.75
3.25	9	18.5	17.25	16.75	25	43.25	27.25	18.75	19.75
2.75	7.25	18.75	10.5	7.5	15	12	9.25	22	19
2.25	9.25	16.5	14.25	12.75	20	19	23.25	12	29.25
1.25	6.25	16	13.5	10	18.5	21	17.75	31.25	22.25
1	9	15.25	8.75	18.5	22.75	18.75	18.5	16	25.25
3.5	13.25	18	23.25	16.25	41.5	32	26.25	25.5	25
3.25	11	13.5	19.75	14.5	25.25	30.5	23.5	28.25	32
3	10.75	16.25	16.25	13	20	21.75	15.75	17.5	30.75
3.5	12	23.5	20	15.75	25	25.5	24.5	28	34.25
4	12.5	13.25	17.5	12.25	29.25	29	22.75	19.75	19
2.75	8.75	13.25	17.5	13.25	16.25	21.25	15.5	27.5	23.25
3.25	6.75	10.75	11	8.5	15.5	11.75	9	6.5	17
1.75	10.5	18	19.75	7.25	32.75	28.25	23	20.25	28.25
2.75	7	16.25	18.5	14.25	23	18.5	16.5	13.75	18
1.5	9	14.75	30.5	16.5	26.25	33.5	24	15.75	22.25
0.75	4.75	13.75	14	10.25	22.5	21.25	18	24	23.25
1.25	6.25	14.75	12	7.75	17.25	21.25	11.5	17.75	13
0.5	7	13.5	9.75	8.25	18.5	16.5	11.5	17	20.25
2.25	11	18.75	26	21.25	28.25	28.75	27.25	19.5	32.5
3	8.75	15	19.5	11.75	20.75	23.25	19	21.5	23.25
2	12.25	20	12.75	12.25	16.5	22.25	17.5	25.5	26.5
3.5	6.25	11.75	20.5	21.25	26.75	38.25	33	23	32.75
2.5	5.5	14.25	19.5	18.25	24	29	23.25	19.25	25.75
3	8	14	16	9.5	15	25	12	12.25	18
2.25	14.5	18	13.25	8	21.75	19.5	12.5	19.25	19.75
2	9.5	17	11.5	12.75	25	19.75	14.75	26.25	26.25
3.5	14.75	23	20.25	15.5	43.5	31.75	24.75	23	22.75
3.5	4.25	8.75	13.25	11	24	23.5	14	23.75	22.75
3.25	11.75	22	18	15	21.5	21.5	19.25	13.25	25.25
2	12	20.25	14.75	12.75	18.25	17.25	16.5	19.75	22.25
2	7.5	18	16.75	11.5	20.75	26	17.25	20.25	24.75
0.75	14.5	11.25	13.25	21	26	22.75	17.5	20.25	23.75
3.5	11.5	23	29.5	24.25	28	36.5	34.75	24	30.25
1.75	9	13.5	13	9.75	16.75	20.5	12.75	16.25	20.75
1.5	11.25	25.5	18.5	18.25	24.25	25	21	23.75	35.75
1.5	11	8.75	17.75	17.75	20.75	21.75	17.25	17.75	24
3.25	7.5	13	17.75	14	21.25	29.25	19	22.5	28.25
3.5	11.25	20.5	26.5	17.25	23.25	31	21.75	25.5	28
1	14	16.5	22	11.25	20.25	30.5	18.75	29.25	22.5
3.75	5.25	11	22	20.75	30.25	31.75	31.25	21.25	27.25
3	11.25	15.25	22	10.75	20.75	21.5	14.75	10.25	17.25
2	7.5	10.25	11.75	8.25	23.25	14.75	13.75	15.75	15.25
3	11.5	17.75	18.75	9	23.25	16.5	15.5	16.5	20
0.75	2.25	9	12.25	6.75	20.5	20.75	11.75	9.25	20
2	5.5	9.75	18.25	18.25	20.75	25.75	26	16.75	25.5
1.75	8	14.75	24.75	13.5	20.5	25.75	26	9.5	24.25
1	11.5	20.75	13.75	8.5	19.25	22.25	13.75	23.25	19
1.75	7.5	11.5	13	7.25	16.5	21.5	15.5	19.5	24
2.5	9	16.25	16	9.5	14.75	15.25	13.25	14	23.5
1	10	23.25	19	14.25	21.5	29.75	21.75	20.25	37.5
3	13	16.75	23	14.75	20.5	28	22.25	37.75	27.75
3.5	9.5	15.75	22.75	12.25	24.25	21.5	19.75	12.25	23.25
2.75	8.25	11.25	15	15.25	26.5	32.25	19.5	14.25	26.5
4.75	16.25	22.75	27.75	16.75	26.75	32.5	24.75	35.5	26.25
5.25	9.5	11.25	23.75	20.5	37	30.5	33.5	22.5	31.75
2.5	8	15	24	12	18	18.25	15	29.5	27.5
2.25	9.75	14.75	18.5	12.5	20	28.25	16.5	22.75	30.75
4.75	8.75	8.75	20.25	17	28.75	33.75	24	20.25	29.75
2.5	11.5	13.5	13.75	15.25	22	19.75	17.75	16.5	24.25
2.25	6.25	8.5	11.25	16	18.75	29.5	19.25	13.25	27.75
1.5	5	8.25	15.75	17.75	24.75	33.75	23.75	18.5	36
2.5	15.25	21.25	24.75	9	21	40.75	25	33	29.5
2.25	9	16.25	17.75	12	18.5	23	15.5	16.75	27
3	14.5	14.25	18.25	18.25	25	27.25	26.75	15.25	31
2.75	9	18.75	42.25	12.5	22.25	38	31.25	23	34.5
1.25	12.5	20.25	55.25	19.75	29.5	49.5	32	28	42.5
4.75	10.5	28.5	34.75	21	34.25	48.25	24.5	20.5	34.25
2.5	11.25	16.25	23	21	19.75	32.75	21	24.25	29.25
3.5	11.5	11	34.75	24	32	30.75	21	37.25	37.75
1.75	14.75	8.25	9.75	18.25	17.75	29	24	15	36
1.25	5.75	9.25	16.75	14.5	18	28.5	9	29.25	20.25
3.75	19.5	34.75	26.5	20	67.25	36.75	13.75	49	33
1.5	6.25	18.5	19.25	11.5	25	23	14.25	25.25	30
1.25	7	20.25	20.75	18.75	23.75	29.25	22	26.5	26
1.25	7	21	22.25	26.25	26.75	32.5	29	24	26.25
4.5	11.25	27.25	16.5	15.75	26.75	38.75	27.25	18.75	29.75
0.75	8	11.75	17.25	9.75	13.75	18.25	9.5	27.75	19.25
3.25	10.5	28.25	16.75	10.75	27	23.5	15	15.75	21.75
2.5	7.25	20	11.75	11.5	24.25	22.75	9.25	29.25	18.75
1.75	5.75	10.75	15.5	13.5	25.75	23.25	23.5	19	27
4.25	11.75	14.75	21.5	13.25	29.25	32.25	22	29.75	24.5
2.25	7	16	12.5	11	22.75	21	13.5	14.75	29
2.5	9.25	23.25	31	15.5	25	29	29.75	15.25	29.5
4.5	7.25	16.5	28	22	26.25	32.25	22.5	27.25	23.25
2.25	6.25	21	19.25	10.5	19	22.75	12.5	19.5	14.5
1.25	5.5	8.75	15	13	20.5	19.25	14	21.5	21.25
2.25	8.75	16.5	12.75	10.75	17.25	17.75	14	30.25	26
2.5	9	16	15.75	11.5	19.75	29	19.5	17	27
2.25	12	20.5	17.25	6	19	18.75	14	18.5	20.25
4.25	7.5	11.25	20.75	14.5	28.75	34.75	23.75	24.75	33.25
4	14.25	17.5	28.75	15	23.25	30.75	24.25	16.25	27.75
4.5	14.5	17.75	16.75	13.5	22.5	23.25	21.25	9.25	20
2.75	6.25	9	15	11.25	14.25	22.25	11.25	16.5	21.5
1.25	9.25	10.25	9.25	10.75	22.75	17.75	13.75	22.75	20.75
0.25	9	13.25	17	11.5	26.5	31.25	23.25	26.5	33.25
3.75	9.75	23	13	8	17.5	16.25	13	23.75	20.25
3.25	11	12.25	24.75	17	31.75	31	28.25	15	30.5
1.75	6.25	6.25	12.25	12	19	22.5	16	16.25	22
4.75	10.25	18	19	17.75	22.75	23	21.75	12	20.75
1	11.25	17.5	12.25	10.75	18.5	23.25	13.25	28.25	22.5
4.25	7.25	8	13.5	14	21.75	27	19	22.5	26.75
3	7.5	14	27.5	15	29.25	35.25	31.5	25.5	30.25
3.25	8.75	12.75	17.5	10.5	23.75	19.25	12.5	23	23.75
3	14	13.5	17	9.5	18.5	26.25	13.25	30	20.25
2.5	8.5	15.25	13	6.75	20	26	17.25	8	21
2.5	10.75	11.25	10	8.25	17	16.75	11	6.25	13.5
2	8	21.75	14.5	14.25	24.5	22.25	19	16.75	25.75
3.75	6.75	11.75	10	12	21.75	31	15.75	9.75	27.25
1.5	3.5	7.75	11.75	5.25	18.5	17.5	9.5	15.25	22.75
2.25	10.25	23	13.5	6.5	19.5	22.75	16.75	19.25	21
2.75	8.75	18.5	14	14.75	18.75	27.75	17	28	24.75
3.25	11.25	11.75	22.25	12.5	19.75	22.75	16.5	16.5	26.5
2.75	9	14.75	31.75	17.25	32.25	35.5	31.25	22.25	24.75
1.5	11.25	19	20.25	11.25	19.5	26.5	23	18.5	22
3.5	6.25	16	14	9	23	31	13.25	20.5	22.75
0.25	11	15.25	14	14.75	20.75	21.5	14.75	13.5	14
3	6.25	10.5	21.75	24.25	28.25	28.75	21	15	26.75
3	8.5	15.75	10	10.25	17	16	11.25	13.25	19.25
2.25	6	6.25	12	7.5	21	20	15.25	18.25	20.5
1	11.25	10.5	14.5	10.75	23	23.25	20.75	26.25	19.25
1.5	5.5	9.75	16.75	10	22.25	20.75	18.5	19.5	21.75
0.5	5.5	13.25	12.5	18	26	17.75	9	16.75	30.75
1.5	4.25	8.5	10.25	14	18.5	19.75	13.75	9.5	22
2.5	11.25	15.5	20.25	22.75	23	28.25	22.75	15	19
3.25	6.25	14	12	14.5	17	22.5	14.25	21	24
2.5	8	17	21.25	18.5	26.25	35.25	22.5	20.75	26.25
1.75	9.5	25.75	17	5.25	21.75	21	14.75	15	19.75
1.75	6.25	12	12.25	16	23.5	22.75	18.5	16.75	21.25
2	5	15	14.25	11.75	19.75	21.75	10.5	25.25	22.5
2.75	5.75	14.75	13.75	13.5	24	29	13.75	13.5	23.5
3	9.25	16.5	21.75	16.5	31.25	24.5	22.5	14.75	22
2	7.5	16.75	14.5	10.5	20.5	22.5	18.75	17.5	16.75
0.5	5	12.75	8.75	11	17.5	17.25	16	21.75	21
1.5	4.5	7.5	18.5	10.25	22.25	27	19.25	16.5	29.25
4.25	10.75	16.5	14.25	12.25	22.25	18.25	11.25	20	25
1.25	11.5	11.75	16.5	15.5	18.5	28.25	16.25	31.75	24.75
0.75	8.5	18.75	22.75	10	22	27.25	18	21.75	30.5
3	7.5	10.5	18.25	19.75	26.5	37.25	27	16	31.75
4	15.5	15.5	33	19.25	27.75	34.5	26.25	20.25	27.25
0.75	8.5	14.25	16.25	11.5	20.5	24.75	12.5	24	25
2	2.5	10.25	9.25	4.75	15.75	21.75	12.75	12.5	18.25
1	5.5	10	10.75	6.25	16.25	14.5	8.75	11.75	19
2	9.75	15.25	14.5	7.5	22.5	21.5	12.5	13.75	24.5
4	3.25	12.5	15.25	18	25.5	29.25	21	16.5	21.5
4.25	11.25	15.75	17.5	11.25	22.25	23.25	10.25	25.5	21.25
3.25	11.5	18.5	17.75	12.75	20	24	19.75	20	26
3.25	10	19	17	17.25	18	20.25	11.75	27	33.25
4.5	11	16.75	38.5	20.25	31.75	33.75	24.25	33.75	34.25
3	12.25	8.5	22.25	14.5	19	35.5	21.25	10.75	25.25
4.25	8	8.75	9.5	9	12.5	14.25	11	10	15.25
0.75	4.5	12.5	12.25	14.5	19.5	21	13.75	15.25	23.5
2.75	5.25	16.5	12.75	16	18	16.75	14.5	19	21.5
2.25	6.5	14.5	16.5	9.5	15.5	22.75	9	22.25	20
6	5.25	16	26.5	23.25	27.25	36	28.25	13.75	24.25
4.5	10.25	14.5	20	12	29.25	38.5	18.75	21.25	24.75
0.75	6.5	11.25	10.75	7.5	12.25	18.5	8.75	13.25	17.75
1.25	14.5	13.75	13.5	11.25	20.5	18.5	11.75	7	18.5
1.25	9.75	9	17.5	11.25	20.25	19.75	14.5	18.5	22.75
3.25	9	12.25	23.25	23.25	31	30.75	27	21	28
2.5	8.25	12.5	18.5	14	18.5	22.75	13.75	28.25	24
5.5	13.75	15.75	34.5	16	28	31.75	24.5	22.5	31
3.75	13.5	16.25	28	18.25	24.75	35	24	19.25	30
1.25	7.5	12.25	22	10	24.5	35.5	15	19.25	29.5
1.25	8.5	6	29.25	11.25	19.5	28.25	15.75	28	37.25
2	9.75	5.25	19.25	9	23.75	35.5	28	11.75	28.25
2	5	8	49	8.5	27.25	42.25	36.5	30	42.75
2.75	8.25	9.25	38.75	12.5	18.25	36.75	25.75	21	38.75
1.5	7.25	8.5	32.25	12.5	51.75	42	23.25	36.25	35.5
7.5	13.5	22.75	44	19.5	39.5	47.75	33.5	47.5	44.75
0.75	11.25	16.5	31.25	22.75	23	37.25	17.5	30.25	39.5
2.25	14.75	22	29.75	21.5	28	36	17	30	32.25
1	9	7.5	21	19.75	24.75	31	16.5	27	27.5
2.25	16	14.25	33.5	16.75	25.25	30.75	20.25	24.75	34
4.75	17.5	21.25	24	20.5	23.25	33.5	15.75	22	31.25
7.5	31.75	24.25	60.25	11.25	32.5	48.75	30	52.5	45.75
5.75	13.5	13.25	49.25	14.25	31.75	52.75	29.75	31.25	38.5
7.25	13.25	11.75	67	23.75	38.75	49.25	38.75	64	37.5
3.5	20.5	24	53	27.75	28.5	58.5	37	51	41.5
2.25	10.5	23	40.75	21	31.75	42.25	29.5	33	35.25
1.75	9	13.25	21.5	13.5	26.75	32.5	15.75	29.5	32
2.5	3.25	13.75	12.25	12.75	27.75	33.5	18.25	15.5	27.75
4.5	7	18	19	24.25	28.25	36.75	23	19.5	29
1.75	5.75	10.75	18.5	8	46.75	30	6.5	34.5	25
1.5	5.25	5.75	14.75	9.5	34.5	20.5	6.75	33	23.5
1.75	7	21.25	22.5	8	31.75	31	14	23	23.5
1	4.5	11.75	6.75	13	16.25	19.75	11.5	19.25	13.75
1.25	3.5	7.25	5.5	10.75	23.75	16	11.25	19.5	23.5
8.75	10.5	20.75	24.75	28.25	28.25	38.5	29.5	27	29
4	13	16.5	25.5	12.25	23.5	32.75	19	18.25	29.25
0.25	7.5	20	12.25	9.5	18	15.5	6.75	17.5	16.25
2.5	10.5	19.75	15	11	35.25	25	20.75	24.25	20.5
1.25	2.75	14	11.75	13.25	21.5	21.25	16	21.75	20
5.25	6	18.5	28	17	26.75	35.5	26	18	29.75
2	4	7.25	15.75	16	18.75	28	14.75	19	24.25
2.5	9.75	10.25	15	9.5	26	23.25	14.25	21	22.25
1.5	9.75	23.5	21.25	13.75	21.25	26.75	22.75	33	30.5
2.25	4.25	6.25	14	15.25	27.5	28	20	14.25	27.25
4.75	9	12.75	23.25	16.5	20.5	26.5	16.25	22.25	22.25
4.75	15.25	17	29	9.25	26.5	25	24.75	15.75	24.5
1	13	14.25	22	9	21.5	17.75	14.25	7.25	15.25
4.25	13	13.75	25	17.25	35.25	23	16	13.25	16.5
1.5	14.25	24.5	17.5	6.75	43.75	34.5	6.5	33.75	31.5
5.75	19.5	24.5	34.25	17.5	37	50.25	13.25	36.5	37.25
4.5	18.75	26	29.25	16.25	45.5	49.75	10	27.75	33.5
6.75	10	22.75	29.25	21.25	30.25	43	8.5	22	34.25
4.5	17.5	19	35.75	19	44.25	38.5	12.5	16.5	38.5
3.75	15.25	23	33	20.5	41.75	44.25	14.25	24.75	36.5
3.75	15.25	21.5	36.25	13.25	43.5	37.75	13.25	29.25	37.75
2	11	16.5	35.75	18	37	31	15.25	27.75	34.5
1.25	3.75	14.75	21	11.25	21.25	25.5	10.5	19.75	18.25
1.75	8.25	23	29	17.5	24.75	29.25	21.75	19.25	19.75
2.75	7.25	13.75	22.75	17.25	28.75	24.25	22.75	12	23
1.25	9.25	14	19	16.5	21.5	28.75	19.75	18.25	21.75
3.5	10	22	14.25	11	19.75	22.5	13	23.25	22
0.5	12	18.25	19.75	12.75	23.5	26	21	16.25	32.5
0.75	4	7.75	13.5	9.5	16.25	19	12.5	17	18.75
3	10.25	16	17.75	17	17	27	16.75	41.5	33.75
4.25	10.75	8.5	24.5	13	23.75	27	29	14	20.5
2.75	14.25	15.75	25.75	20.25	24.75	26	24.5	17.75	23
2.75	11.25	14.75	17.5	18.25	30.75	27	20.25	10.5	20.25
3.5	5.25	5.5	16	17.25	26.5	28	19.75	15.5	20
3.5	12	16	17	8.75	20.5	17	10.25	20	21
2.5	6.25	15	16.25	14.25	18.25	19.25	13.5	32.5	26.5
1.75	7	18.5	14	8.5	20.75	26.5	11	17.5	24.25
2.25	7	19.5	11	8.25	20.75	19.25	10	18.5	13.25
1.25	11	12.25	15.75	14.25	22.75	23	17.25	9.25	20.75
5.25	9.75	17.25	17.25	18.25	26	33.75	29.25	20.5	27
2.75	7	15.75	19.5	13	31.5	33.75	19.75	14.25	33.75
2.5	13.75	21.25	23.25	16	20.5	25.5	22.75	20.25	23
3	6.75	14	10	13	22	22	16.75	18.5	21.5
3	5.25	13	11.25	14	18	17	9.75	28.5	27.75
3	9.25	17.5	18.75	11	21	27.75	14.75	28.75	29.75
1.75	5.25	9.75	13	13.25	23	23.25	17.25	13.25	27.5
5.25	15.25	13.75	26.25	20.25	28	30.75	23.5	25.75	25.25
2.5	14.75	15.75	20.5	9.5	21	29.75	20	13.25	20
2.25	10.25	15.25	21	15	20	24.25	15.25	30.25	26.25
2	8.25	5.75	15	10.5	21	24.25	16	13.5	21.75
3	10.25	15	26.25	16.5	24.5	25.25	24.25	14.25	23.5
2.5	9.25	12.5	30	19	26.75	33.5	22.75	21.5	34
1	2	16.25	11.5	8.75	23.5	16	5.75	11	13.25
0.75	7.75	13.25	9.75	15.5	20.25	14.75	5.5	37.25	25.25
0.75	2	7.75	8.25	8.5	13.75	17.75	10.25	4.5	21
1	6.75	14.5	11	7.5	22.5	25.5	15	17.25	24
3	8.25	15.5	18	15.75	21.5	28.5	18.25	27.25	23.5
2.75	16	28	25.25	7.25	15.5	27	14.25	25.25	22.5
1.5	5.5	7.75	13.75	11.5	18.75	18.75	12.75	14.25	18.5
4	12.25	15.75	34.25	20.5	32.75	28.25	30.75	21.5	30
4	6.25	8.5	16.25	11.75	20	35.75	18.25	19	19.25
1.5	10	21.5	12.75	8.25	24.75	18.5	11.5	14	24.5
1.5	1.75	11.25	11	7	17.5	16.5	9.75	16.75	20.5
1	7.75	11.5	14.25	7.5	18.75	20	12.25	16.25	22.25
3.5	9.25	13.5	28.75	21	35.25	33.5	21.5	19.25	26.5
1.5	7.75	13.25	17.25	8.5	21.25	22.25	16	10.75	22
3.5	6	10.75	16.5	8	23	26.25	24	20.25	26.25
4.25	19.75	22	32	13.5	27.25	26.75	19	29.5	26.5
5	7.75	14	24	17.25	29.5	31.75	22.5	22	32
2.25	9	6.5	12.75	9.75	16.5	19.5	11	9.75	21
1	6	15	13.5	13	24	18.25	7.75	13.25	24.25
2.25	6	6.5	9.75	15.75	22	18.25	13	11	25.75
1.75	6.25	10.25	17.5	21.75	31.5	31.5	28.25	15.25	26.25
2.5	11.25	20	24.25	16	27	32.25	21.75	19	24.25
2.75	11.75	22.25	21.25	11	39.25	28.75	8	46	35.5
1.5	4.25	7.5	16	15.5	14.75	23.5	11.5	22.75	22
1.5	4	8	13.5	22.5	20	15.5	17.75	16	26
3.5	11.5	18	33.5	20	33.5	29.75	26	19.5	28.75
1.5	9.75	13.5	20.25	12	22.25	25.5	13.75	10	18
0.5	8.5	19.5	15.75	13.25	18.5	18.75	9.25	29	27.25
2	5.5	10.5	14.25	8.5	14.5	22.25	10.75	19	24
2.25	7.75	16.5	20.75	8.25	38.25	26.75	13	17.5	22.25
1.25	7	16.75	14.75	14	33	25.75	15.25	21.25	24.25
0.75	3.75	14.25	9	12.25	23	13.25	16.25	19.5	23.75
1.75	8	14.25	13.25	10.75	18.75	25.25	7.75	21.25	24.25
2.75	12.75	21.25	14.25	8.5	21.25	20.25	8	12.75	20
2	5	10.75	10	10	23.5	27.5	14	26.75	26.25
2.5	9.75	9.25	20.5	14.25	24.5	28.25	13.5	14.5	23.5
2	10.25	12.25	15	13	28.5	27.25	18.75	17.75	23
5.25	10.5	16.25	25.75	18.25	30.5	35.5	22.5	30.5	28.75
2.5	5	8.75	12	9.25	15.5	22	11.75	10.25	20.75
2.5	11.5	27.25	25.5	7.75	25	33	18.75	28.75	23
2.25	6.5	14	15	11.5	23	22.75	13.5	18.75	27.25
3.25	7.25	8.75	21	10.25	24.75	29.75	16.5	25.25	21.25
1.25	5.25	6.25	16.25	13	35.5	28.5	22	13	23.75
2.25	10.25	10.5	17.5	7.75	21.5	15.75	11	8	11
4.25	14	12.75	14	16.5	41.75	32.5	14	23	19.25
4	11.25	11.5	11.25	9	18.75	21.5	10.75	13	15.75
0.75	5.75	10.75	11.25	6.25	19.25	14.75	10.75	13.25	22
1.5	5.5	12.25	19	10	19.75	31.75	10.75	27.25	23.5
4.75	18.25	32.25	24	29.5	45	29.5	14.5	38.25	56.25
5.5	23.25	36	36.75	33.25	57.5	38.75	18.75	42.5	59.5
0.5	12.25	25.25	31.5	23.5	61	32.25	9.75	42.5	31.5
1.5	5.5	13	16.5	12.75	23	31	11	23	21.25
1.75	2.5	7.25	11.25	19.75	23.75	26.75	17.75	19.25	30.25
5.5	5	19.25	18.75	22.5	32.75	48.75	26.75	16.5	25.25
1.75	6.25	17.25	13.25	3.25	18.25	10.5	7	18	16
1.25	5.5	22.25	15	8	26	25.5	12	12	17.5
0.25	6	9.5	9.5	6.75	22.75	21.5	9.75	24.25	23.25
1.75	4.75	9.75	8.75	12.75	21	20.75	8	14.75	16.5
3.75	11	15	24	12.5	29.25	28	21.25	7.5	24.5
2.75	7.25	16	17	13	16.75	22.75	15	25.5	21.5
2.5	6.5	10	19.75	8	27.5	36	13.75	24.25	27.5
3.5	11	11.25	18.25	10.25	22.75	23.75	14.75	15.75	21.75
5	11.75	19	29.25	16.75	32	28.5	17.75	23.5	29.25
2	12.75	20.5	17.75	10.25	17	21.75	15	12.25	17.25
2.75	3.25	8.25	9.5	6.75	27.5	25.75	10.75	12.75	22
1.25	8	8	8.25	5.25	16.25	18.25	5.5	8	17
2.5	9.5	14	18.5	9.75	25.75	21.5	14.25	19.5	20.5
3.25	3	7.5	12.5	9	20.25	24.75	10.5	9.25	19.25
2.5	2	7	9.75	8	25.5	23.75	7.75	20.5	19.5
2	9	16	15	9.5	13.75	32.25	10.25	15.75	22
1.75	6	11	16.25	9.5	23.75	23.5	13.25	10.75	19.5
4	15	25.25	23.25	11	24.75	35.25	18	25.75	22
3.5	10.5	12.5	30	17	28.75	36.5	17.75	18	22.5
5.75	10.75	17	21.5	14.25	24.5	26.5	14.25	26.5	24
1.5	10.25	18.5	19	15	25.25	25.75	14.5	21.25	26.75
0.5	5.25	6.75	17.75	9.5	28.25	26.75	17	16.75	33.75
3	5.75	12.5	17	17	33.5	28.75	17.25	18.75	26.75
2.25	4.5	7.25	17.25	10.25	19.25	25.75	12.5	24.5	23.25
2.5	11.25	21.5	18.5	10	24.5	27.5	12.5	22.5	25.25
2.25	10.75	15.75	21.75	11.25	26.5	40.5	20.25	13	31
4.75	8.75	8.25	19.25	14.25	21	27.25	13.25	17.75	20.75
3.5	11.25	9.75	20.5	10.75	22.75	30.25	10.25	12.75	21.75
2.75	4.5	7.75	21.25	17	25.75	34.5	16.5	16.5	27.5
1.5	6.5	4.5	17.5	28.5	28.5	33.25	20	26.5	29.75
2.25	7.25	5.5	9.25	5.5	31	20	5.75	16.5	14
3	9	11	15	9	41	24.25	8.5	21.25	16.5
1.25	5.5	4.75	11.25	11.5	31.75	21	5.75	14.5	19
2.25	7.75	12.75	21.5	19.75	28	38.5	18	15.5	28
4.25	11	15.75	23	22.5	31.5	36.75	21.75	12.75	25.5
1.25	7.75	14.5	16.75	6.5	22.75	16	7.25	14.5	15
0.75	5	14.25	6.25	6.5	21.25	12.5	5.25	11.25	15
1.25	4.25	9.5	6	11.75	18	21.25	8.75	9.25	19.75
0.75	5.75	21.25	14.75	11.25	22.5	21	7.25	17.25	19.25
6	9.25	10.5	24.75	26.25	35.25	38.25	20.25	18	30.25
3.5	4	9.5	16.5	11.25	29	29.5	15.5	10.25	25.5
1.5	13.25	20.25	21	12.5	24.25	39	16	38	26.5
2	12.25	19.5	21.5	8.5	29	27.75	14.75	24.5	20
1.5	8.75	8.25	11.5	6.75	19.5	25	10	10.75	19.5
1.25	9.75	9.25	17.25	9.75	27.25	28.5	8.75	16	20.5
0.5	5.5	19.25	11.75	4.75	17.25	23.75	8	16.75	17.25
2	4.25	8	9	16.25	20.5	17.25	9.25	20.25	16.75
3.25	6.25	7.5	12.75	10.75	19	23.5	10.25	7	21
1.75	3.25	7.75	18	10	20	21.5	17	14.5	17.5
3.5	11.25	16.5	28.5	16.5	32	34.75	20	18.75	27.75
2.25	6	13.75	12.25	11.5	18.25	20.25	10	12.5	15.75
0.75	2.75	4	7	8.25	18.5	17.25	4.5	17	17
2	9.25	18.5	18	14.75	31.75	28.25	15.75	15	26
3	9.75	12.25	17.5	12.75	19.75	24	5	23.75	22.75
0.25	5	12	12.25	11.75	21.5	17	12	12	20.75
3	7.25	15.75	12	14.5	22.75	26.25	11.25	20.5	24
2.25	6	14.25	21.25	12.75	23.5	33	18.5	15.5	25.25
1.5	2.75	10.5	16	11.75	23.75	23.75	13.25	15	17.5
5.25	6	17.25	20.5	9	23.25	22.5	12.25	13	16.75
1.5	6	11.5	10	9	12.75	19.75	6.25	10.5	14.25
1.25	6.25	12.25	8.25	6.5	25	20.5	7.75	21	25.75
4.75	10.25	14	28	18.5	28.75	32.75	19.25	12.25	27
2	3.25	11.25	11	7	18	15	5.25	9.25	13.75
5	8	9	10.5	9	24.75	29.25	10.5	14.25	26
1.25	12.75	13.75	17.25	15	29.75	25.25	8	24.25	21.75
4	8	13.75	20.5	11.25	20	28.75	9.75	24.25	27
1.5	7.5	11.75	16	9.75	29	28.5	16.75	16	26.5
4	9.75	16.75	32.5	11.5	29.25	29.5	15.5	8	29
2.75	6.25	5.25	26.25	10.75	26.75	30.75	16.5	9.75	32.75
2.5	7.5	14.25	22	12.25	25.5	41	11.75	24	41.5
1.5	4.5	9.75	14.5	11.75	21.75	24.5	12	27.5	26.5
1.25	13.5	15.75	21	16.5	24.25	29.75	12.5	30.75	27.5
1.5	8	15.25	21	23.25	31	39.25	21.75	26.5	26
3.5	7.25	13.25	26.75	22	26.5	36.25	16.25	14	30.25
1.75	11	9	17	13.5	26	29.5	14.25	18	26.75
2.75	8.75	13.5	19.5	14.25	25.75	33.5	11.5	27.25	21.5
1	5.25	13.25	19.25	15.75	24.5	30	12.75	16.5	29.5
1	9	12	39.5	12.75	31.25	38.75	28.5	18.25	39
4.25	10.25	14.25	21.75	11.25	29	36	16.5	18	32.75
3	13.25	18.25	33.75	22.25	27.75	43.25	16.75	25.25	29.25
6	16	20.75	38.75	18	26.5	36.5	10.25	35	32.25
2.25	10.5	17.75	30	10	42.5	38.75	18.5	23.75	33.75
2.25	4.25	9.5	14.5	12.25	38.75	33	9.25	15.5	28.5
3.5	14.25	26.75	20.5	17	87.25	33.25	13.25	45	25.75
2.25	5.5	9.25	20.5	11.5	35	32	12.25	22.5	31.25
1.75	3.5	12.25	14.25	12	25.25	22.75	11.5	10.75	22.25
2.25	9.5	31.25	21.75	9.75	25	26.75	14.5	23.75	22.75
1.5	2	8.5	9.75	12.5	22.5	20.5	10	13	22.75
3.5	12.75	17	28.25	9.5	29.25	31	21.75	8.5	24.25
1.75	6	8.75	15.5	12.75	21.25	28	11	8.25	20.25
2.25	4.5	12.25	13.75	14.5	22.75	17.5	9.25	10.75	20.5
2	5.75	17	12.5	12.75	29.75	30	12.5	19.25	26.5
2.25	4.75	9.75	16.75	21	33.75	42.25	17.5	21.5	32
7.25	8.75	16.25	22.75	11.25	29	29	16.25	30.5	28.25
2	12.5	16.5	20.25	10.5	25.25	26	11.75	31.75	23.5
3.5	5.5	9.75	10.75	8.25	22.5	21.5	11	7.5	18.25
2	5.75	12.5	20.5	19.75	25.75	31.5	19.25	23.75	24.25
3.75	9.5	21	30	16	32.25	32.25	19.75	13.25	20.25
2	11.75	13.75	9.25	6.75	21.25	18	5.75	25.75	18.75
6	17.5	13.5	23.25	6.5	25.25	23.5	13.75	8.75	20.5
1.25	3.75	19.25	10.5	10.25	23.5	19.25	7.25	15	19.5
2.5	5.5	10.25	20.25	10.5	27.75	31	15.75	15.5	24
2	8.25	9.25	18.75	16.5	30.75	39.75	15.75	21.25	25.5
1.25	8.5	26.25	11.25	7.5	19.25	27.75	10	14.25	19
2	4	10.25	11.5	7	25.75	33.5	13.25	19.25	15.25
1.75	4.5	10.75	12.5	15.25	22.25	27.25	13.75	17.25	14.75
1.5	5.75	13.5	9	4.75	15	10.25	5.25	11.25	18.25
4.75	9.5	17	29.25	14.25	31	31.5	22.75	12.75	28
3.5	2.5	7.75	7.25	12.75	28.25	26	12.5	8.25	17.75
1	2.75	7.75	11.5	5	28.25	20.25	5.75	9.75	19
1	5.25	8.25	11.75	10.75	22.5	27.5	6.75	24.25	21.75
2.25	5.5	11	8.5	5.75	25.5	15.75	6.25	14.75	13.75
2.75	4.5	16.25	14.5	14.25	22.75	22	12.25	26.75	19
1	6	20	18.5	9.5	26.75	26	11	17	22
2	4.75	16	14.25	8.5	22.25	22.75	12	21	20.5
3	9	15.25	38	14.75	37	32.5	24.75	12.5	26.5
0.75	4.5	7.5	12.5	10.75	31	23.5	13.75	11.75	19.5
3	6.25	7.75	14	9.5	27	24.5	7.25	17	21.5
3	4.75	6.5	11.75	10	26.5	25.25	10.5	18.5	22.25
4	11	16.75	23	18.25	24.25	30	15.75	11.5	18.5
1	4.75	13	8.5	10.75	20.75	20.75	6.75	17.75	19.25
0.75	3.5	10.75	9.5	5.5	27	21	8.75	8.25	15.5
2.5	2.75	13	10.5	9	28.5	16.5	10.75	8.25	15.5
1.5	9.25	24.5	12.75	5.25	21.25	20.75	11.5	18	24.75
2.5	5.75	3.5	8	6.25	19.25	16.5	8	11.5	18.75
2	7	14	20	18	26	25	20.25	22.25	26.75
2.5	7.75	17.75	12.75	10	19.75	19	8	19.75	20
3	9.5	16	30.5	17.75	32.75	31.75	22.75	22.25	26.5
2.75	2.5	9.25	17	18	30.75	26.75	17.5	13.25	23.75
1.5	5	9.25	9	9	25.25	17.5	3	13.25	15.25
2.25	4.5	9.25	15	7.25	24.25	23.25	9.75	13.25	17
1.5	5.5	10	14.25	7	21.75	18	5.5	19	15.75
3.5	9.25	12	19.5	15	39	37.25	23	5.25	25.25
3.25	11.25	15.25	18.5	7.75	21.25	25.75	12.5	15.75	19
2.25	6.75	11	11	10	19.75	27.75	8.75	24.75	20.5
1.5	4.5	8	6.75	10.75	20.5	18	9.25	7.25	16.75
3	8.25	15.25	18.25	18.25	29.25	26.75	17.25	17	22.75
1.75	8.5	11.75	18.5	10.75	26.25	20.75	11.25	21.25	20.75
1.75	6	17.5	15	8.5	21.75	19.25	8.75	15.25	18.25
2.25	5.25	6.5	15	9.75	24.75	24	11	13.75	24.5
2.25	6.5	17	20.75	7.25	23.25	32.5	11.5	16.25	26.5
2	9.75	21.5	18.75	11.75	19.5	25.5	11.75	19.5	23.5
3.25	5.75	8	12	16	29.75	26.5	14	17	26.75
1.5	5.75	7.5	19	8.75	29.25	28.75	13.75	17.25	21.25
1.25	11.75	14.5	15.25	12.25	19.75	30.75	7.75	30	22.75
1.5	6	9.25	14	10.5	22.5	23.25	10.75	11.75	24.75
2.5	4	8.25	11.5	6.75	23.5	32	6.75	9.5	13
2.25	7	15	14.5	7	32.75	35.5	6	17.5	23.75
4.75	16.75	30.25	25.5	16.25	91.75	47.5	4.25	49	31.5
2	6	19.75	26.25	19.25	43.5	38.25	3.5	22.25	27.75
1.5	2.5	12.25	15.75	19.75	33.25	35.75	9.5	25.5	23.75
2.5	11.25	24	22	16.5	53.5	40.25	6.75	17.25	21.5
3.5	15.25	35.25	31.75	22.25	67.5	39	4.75	37.75	25
4.5	22.25	39.5	36.5	21.75	72.5	40.5	9.75	33.5	29.75
3.25	10.5	29.5	25.25	22	39.25	39.5	8.75	24	33.5
3.5	10.75	24	32	27.75	45.25	37.25	11.25	29.5	32.25
2.5	7.25	14	29.5	16.5	46.75	31.25	13	18	30.25
2.5	6.5	15.5	24.5	14.75	39.75	31.5	10	20.75	29
2.25	9.75	23	30.25	11.75	37.25	28.5	13.5	16.5	16.75
3.25	10.75	14.75	26.25	13.5	29	27.5	12	14.5	12.5
2	6.25	22	19.75	9.25	31.75	29	6	22.25	13.25
3.25	12	32.75	25.75	10.5	41	27.75	14.75	18.25	24
4	8	21.25	23.75	11.5	42.25	28.25	13.25	34.75	19.5
3	12.25	16.5	22.75	14.25	43	31.25	10.5	19.5	16.75
4.5	19.75	28.25	31.5	14.5	35	42.25	11.25	26.25	30.5
3	12.25	28.25	36.5	21.5	61	40.75	9.75	32	32.75
1.75	8.25	14.25	29.25	9.5	28.25	32.5	8.25	40.25	23.5
4.5	6.75	11	14.25	8	29.5	24.75	10.5	9.5	22.5
3	10.75	20.5	16	9.75	24	25.75	12.5	27	17.75
2	4.25	7.75	16	7	18.5	23	10.75	10	20.5
3.25	6.5	18.75	23	15	33	26.25	19.25	33	24.25
3.5	6.25	17.25	17.25	13.25	32.75	22.5	10	17	21.75
2.25	3.25	9.75	17.5	9	31.25	24	11	10.25	19.25
3.75	9	13	29.25	23.5	36.75	39	19.75	16.75	25.5
1.25	4	18.75	12	8	17.5	13.5	5	13.25	14
2	7.25	12	19.25	12.75	27.75	30.75	14.25	31.25	26.25
2.75	7.5	15	18	9.25	31	30	16.5	14.5	19.25
5	12.75	20.5	33	12.5	33	35.25	21.75	9.75	28.5
4.5	7.5	11.75	16.75	11.25	22.75	27.25	13.75	11.25	20.75
2.5	6.25	15	23.5	15.5	33.25	27.25	16.25	15.75	20.25
2	9	12.25	21.5	13	29.75	31.75	13.75	6.5	23
1.25	5.75	19.25	13	10.25	21.5	18	11.5	12.5	18.5
2	3.75	8.5	11	15.5	24.75	29.25	13.25	11.5	19
1.75	8	18.5	7.25	7	30.5	26	4.75	26	19.5
1.25	2.75	6.5	13.5	17.75	27	27.75	14.75	22.75	22.75
2.75	10.5	16.75	27	25.25	36.25	32.5	24.5	29.25	28.75
2.5	3.5	8	10.25	12.5	22.75	29.75	11.25	17.5	18.5
1	5.5	13.5	17.75	12.5	33.25	39.25	16.75	29.25	21.5
0.75	7.25	18.75	14.25	5.25	17	18	4.75	26	13.75
2.5	6.25	16.5	13.5	5.75	26.75	27.5	11.25	18.75	23.25
1.75	4.75	5.25	12.5	14.75	26.25	25.5	7	17.25	22.5
4.5	8	18.5	23.5	16.5	56.25	39.5	22	18	23.5
2.25	3.5	8.75	11.75	7	17	26.5	7.5	12	21
1.5	3.25	12	8.75	6.25	18.75	13.25	4.5	8.25	16.25
1.5	5.75	16	15.5	16.75	43.5	25.75	14.75	19.25	24.5
2	6.25	23	13	13	55.75	29.75	17.75	28	20.75
2.25	2.25	6.25	14.5	19.5	31	28.5	17.5	10.5	19.5
2.75	13.25	28.25	22	16.75	53.5	37.5	8.75	25.25	29.75
5.5	19	30	28.75	41	63	41.75	10.5	23.25	39.5
5.5	14.25	27	30.25	30.75	54	42.25	11.25	19	43.75
6.5	14	27.25	30.25	41.25	62.5	38.75	14.25	30	49
5.25	20	28	35	41	76.25	47.75	14	37.5	43
6.25	15	26.5	30.75	32.25	42.25	37.75	16	25.75	41.25
4.5	14.25	23.25	30	30.25	52.5	44.75	17.25	20.25	42.75
6.25	19.5	24.5	47	31.25	58	47.5	22.5	30.75	41
3.5	8.75	25.75	29.75	18.75	48	40.5	14.75	25	34
6	17.5	28.5	43.25	25	60.5	43.25	16.5	25	38.75
6.5	21.75	29.75	36.5	20	76.75	59	18.75	23	39.5
4.75	22.25	32.75	33.5	20.75	70.25	51.5	18	24.75	38.5
4.75	16.5	32	30.25	24.5	41	47.75	13.75	35.25	35.25
3.75	12	25.25	37.75	14.25	52.25	45	11.75	41.25	41
2.5	17.25	23.25	34.25	18	46.5	51.25	13.75	28.25	35.25
8.75	19.75	31.25	34.75	19	41.25	48.5	16.5	25.75	40.25
3	24.75	34.25	36.25	14.75	66.25	43.75	9.25	24	32.5
6.5	13.75	32.25	38	20.25	37.5	38.5	13.25	19	34.5
5.75	17	28.75	37.75	21	61	46	14.25	30.75	33
5.75	15.75	29	32.5	21.25	55	41.5	13.75	27	36
4.5	18	23.5	33.5	20.25	51	47.25	16.75	25.25	31.25
3.5	19.25	29	33	18.75	38.5	34	11	37.75	36
7.25	15.25	19.5	42.25	21	46.75	41.25	11.75	27.75	40.75
4	17.75	26.25	33.75	17.75	66.75	39.75	15	32	45
4.5	19.25	28.5	35	17.25	59.5	46	20.25	19.25	36.75
6.25	12	28	44	19.5	50.25	46.5	13.75	26.5	35.5
3.5	19.5	30.5	35.75	18.25	55.5	39	16.5	34.5	37
5.5	19	32.25	35.5	15.5	44.75	39.25	16.5	36.75	43.5
6.75	19.75	37	44.75	20.25	55.75	42	16	27	38.25
5.75	24.25	35.5	39.75	20	65.25	40.25	10.25	39	32.75
3.5	36.75	33.25	54.75	16	55.5	40	15	25.25	32
8	32	43.25	60.75	17.75	36	49.25	24.25	24.25	34
5.75	15.75	49.75	35	22.25	46.25	42.5	16	28.5	30.75
5.25	19.5	47.25	36	25.25	61.25	38.5	17	28.75	34.25
3.75	15.25	39.75	38	20	56.5	37.5	14.75	31.75	31.5
4	15.75	32.25	43	21	57.75	36.25	13.75	33.75	35.5
2.75	5.25	8.75	28.25	14	31	39.75	13.75	15.5	27.5
3.5	9	14.5	28.25	15.25	33.5	31	17.25	18.25	31.75
3.75	10.25	24.75	29.5	12.5	49.25	27.75	19	35	21.5
2.5	4.5	14.5	22.75	12.25	27.25	27.75	10.5	13.25	24.25
4	12.25	13.5	21.5	11.5	28.5	27.75	14	13	22
4.25	8.25	16.5	24.25	14	40.25	23.75	22.75	19	21.25
3	16.5	25.25	30	12.75	50.5	25	15	23.75	23
1.75	8.5	15.25	27	16	33	28	15.5	20	26
2	6.75	15.75	26.25	19	32.25	24.5	17.75	26.75	21.75
2.5	5	15.5	26.25	15.75	30.5	25	9.25	18.5	20.75
1.75	22.5	19	28	15.5	89.5	34.5	14.5	33.75	28.5
4.25	14.25	17.75	34.5	17.75	60	39.5	9	30	34
4.5	17.75	19	33	20.75	49	38	10	29.25	33.5
2.25	18.25	27	37	27.75	64.25	48	11.75	28	31.25
2.75	25	35.25	43.5	28.75	84.75	42.5	18.75	38.5	36.25
2.5	12.75	19	36.75	31	44	39.75	18.25	23.75	26.75
2.5	13	23.75	36.25	23.25	73.25	31.25	13.75	36.25	33.5
2	20.5	23	30.75	16.75	66.5	27	10.75	28.25	23.25
3.75	13.75	20.75	34	19.5	69.5	35.25	14.25	44.75	30.5
2.25	6.25	15.75	26.25	13.5	50.25	30.5	8.25	17.25	27.25
3	14.25	18.75	24.25	12.5	60.75	30.5	14	13	22.5
1.5	11.25	26.5	28.25	13	61.5	40	20	32.5	24.75
2	11.75	15	23.75	16	55.25	29.5	10.75	16.5	24.5
2.75	14.25	21.75	24.5	8.75	55.5	24.25	7.75	15	18.25
2	19.25	27.75	26.75	19.5	68	34	14.25	45.75	22
3	22	25.75	30.25	11.75	52.25	29.5	11	37.75	29.75
2	16	22.25	18.75	8.75	64	25.25	8.75	34.5	17
1.75	12	16	26	13.5	50.25	30.75	15.75	38.5	23.75
2.75	15	18.75	16.75	15.25	46.25	23.5	9	21.25	25.75
3.75	10.25	13.5	17.75	12.75	54.5	30	11.75	30.75	18.25
3.25	9.25	9.25	21.75	9.25	37.5	31.75	10.25	30.75	19.5
1.5	14.5	25	16.5	13.25	55.25	24.5	12	26.25	20.25
1.75	17.75	16.5	21.75	13.25	47.25	22	11	28.25	19.75
3	6.5	16.75	22	12	34.5	31.5	12.25	21.5	23.25
4	17.75	26	18	8.25	59	23.5	6.5	30.75	29.25
3.75	14.25	12.5	21.5	14	52.25	32.5	13.75	32	23
4.75	25.5	28.5	32.75	13.75	59.5	27.25	14	37.5	30
3.75	9	19.5	26.25	14.75	46.75	25.5	10	16.5	32.75
3	11	17	15.75	9	59.25	27	9.25	17	16.75
3	13.25	18	23	13.75	53.25	29.75	17.5	18.75	24.25
4	26	24	27.5	18	39	35	13	26	34.75
3.75	14	15.5	29.75	17	34	34	9.5	36.75	32
3.25	5.25	16.25	31.25	19.5	24	34.75	12.25	10.25	19.75
6.5	11.5	26.75	30.5	19.5	34.5	35.75	19.5	19	28.25
11.75	33.25	47.5	47.75	44.25	70.75	50.75	35.5	49.5	46.75
11.25	41.25	68.25	64.5	29	71.25	54.25	22.25	102	40
10.5	28.25	40	52	17.75	59.75	60.25	40.25	102.75	33.5
10	26.5	35.75	46	16.75	62	61	33.25	82.5	36.25
5	15.75	22.75	41	11.25	40.75	45.25	27	76.25	34.5
7.75	25.5	35.25	45.75	17.75	41.75	41.5	22.25	86.25	37.25
9	30.25	50.75	65	18.75	68.5	36.75	19	106.5	32.75
10.75	35.25	52.75	51.5	24.25	86	48.25	16.25	78.75	31
16	36.5	48.75	49.25	21.75	88.25	39	21.5	71.5	31.75
8.5	28.25	35.5	41.5	18.75	56.25	37	19.5	65.25	32.75
7.25	15.5	41	39.75	18.5	33.75	44.5	21.25	62	46
9.75	24.75	48.25	48	19.25	45.25	48	36.5	75.5	41.25
6.5	20.75	33.75	43	13	44.25	56.75	32.75	75.75	33
7.75	18.5	31.25	43.75	11.5	36.75	54.25	34.25	72	31
13.5	33.75	53.75	54.75	26.75	60	54	31.75	85	46.5
10.75	30.5	53.75	51.25	29.5	68	45	27.75	69	47.25
12.5	27.5	50	43.75	30	64	40.75	32.75	46.5	34.25
3.25	17.5	40.5	33	22.5	47	40.25	23.25	65	28.5
3.75	14.25	24.75	39	18	36.25	39.25	15	70.75	26.75
4.75	21	24.5	35.75	17.75	34.25	45.25	11	53.25	34.5
3	21.25	25.25	34.75	18.75	37.25	35.25	16	38.5	31.75
2.75	25.75	36.25	41	17	65.75	40.75	18.25	43.25	38.5
3.25	23.25	32.25	33.5	19.75	54.5	39.75	14	49	36.75
3.75	31	42.25	43	22.75	65.25	42.75	23.75	54	39
9.25	39.25	63.25	70.5	35.75	83.75	58.25	45.75	65.5	52.75
17.25	51.25	60.5	68	36.75	100	57.5	32	89.5	40
6.25	37.25	50.25	46.25	26.25	70	40.5	11	43	31.75
5.25	22.25	34.5	45.75	24	49.25	37.5	15.75	31.5	36
5.25	38.25	40.75	41	24.25	58.5	34	12.75	35.75	33.75
16.25	55.25	74.5	91.5	35.25	125	50	47.5	79.75	39.5
16.5	61.5	53.75	74.75	23	145.75	49.5	40.75	76.25	37
16.25	56.25	56	73.75	35	117	53.75	39.75	69	39.75
13	42.5	42	64.75	32.75	84.75	61.5	40.75	78.5	43.5
22.5	64.75	69.5	81	33	136.5	53.5	39	83	34
14	57.5	48.75	79	49.25	115.5	49	40.5	65	43
17.5	58.25	63	79.25	33	108.25	55.25	37	67.25	39.5
19.25	56.75	53.75	77	48	107.75	62	41	100.5	41.5
15.25	51.5	56	82.25	47	88.5	64	39.75	81	47.25
16	51.75	47.25	77.75	29.75	99.25	54	44.5	69	42.5
14.75	58	56	75.75	26.5	93	51	36	53.5	34.5
13.25	56.75	63	70.75	26.75	94.75	48.25	24.75	52	32.5
7.25	46.75	51.5	41.75	20	44	42.25	12.75	35.75	28.5
11	59	51.25	76.75	22.25	58.25	47.25	34	47.75	37.75
12.75	46.25	47	66.75	48	84.75	54.75	30.75	75.75	40.5
6.25	28.5	32.75	43	21.25	50.75	37.5	8.5	50.25	22
7.25	43.5	54.75	72.25	27.5	35.75	36.25	29.5	48.25	33.5
16.25	55.75	54.75	84.25	44.25	102.5	60	44.5	92	46.75
10.75	51.75	55.75	82.25	27	83	47.25	36.25	54.75	38.5
12.75	55.5	58.25	70	25.25	82.75	49.25	27.75	54	36.75
19.75	63.5	73.25	88.25	32.75	100.75	56.75	44.75	78.75	49
19.75	60.75	60	81.5	29.75	121.25	49.75	41.75	86	42.75
18.25	55.75	68.5	76.75	29.75	115.25	49	35	80.5	32.5
21	56.25	57.25	87	30	115.25	69.75	38.25	72.75	38.5
16.75	54.75	61	85.25	42	108.25	57	44.75	106	45.75
21.5	76.75	70	94.5	35.5	111.75	51	37	86.5	31.25
20.25	55.5	58.5	85.75	47	110.25	60.5	31	92.5	28.75
20	60.25	53.25	97.5	54.5	95.5	66.75	41.25	95.25	53.25
12.75	57.5	54.25	78.25	38.75	103.25	58	35.5	90	44
20	60.75	66	84	32.5	104	51.75	48.75	76.5	43
18	59.25	71.75	78.5	35.5	103.25	48.5	48	71.25	32.25
16.25	53.5	56.5	75	45.75	98.75	56.25	51	87.25	41.25
18	54	55.25	83.75	42.25	110.75	52.5	45	88.75	44
15.25	50.75	49.5	73.5	38.25	96.5	64.5	41.75	90	50.5
15.25	57	62.75	84.5	36.25	114.5	63.75	36.25	79.5	46.75
12.25	58.5	63.25	60.75	31.5	87.5	45.25	26	64.75	28.75
11	63.25	75	73.5	32	80	59.5	39.75	76.25	39
11.25	37.5	39	42.75	23.5	56.75	63	23.75	49.25	34
4	35	55.25	44.75	28.25	30.25	49.5	13.75	45	30
4.75	19.75	33	35	34	36	42.75	20.5	22.5	31.5
3.25	24	41	39	29.25	44.5	44.25	16.25	50	34
4.25	24.75	45.5	32.25	30.75	51.5	47	16.5	36.25	33
5.25	31.5	58.75	46.5	26.25	45	44.5	13.25	50.25	36.25
9.5	41.75	73.75	60.25	22.75	76.75	64.25	31	77.5	64
7	33.75	46.25	53.5	23	48.75	58	22.75	77.25	44
7.75	34.5	49	57.75	26.75	65.75	62	31.5	82	54.25
7.25	38	53.75	47.25	17.75	61.75	63.25	21.75	63.25	45
5.5	31	50.75	35.75	17.75	61.75	51	16.5	62	43
7.5	32.25	45.25	44.25	21	49	61	27.75	66.5	43
8.25	37	42.75	48.5	21.75	65.75	63.5	23.25	62.25	45
8.5	26.25	36	37.5	28.25	69.5	42.75	16.5	43	43.5
7	21.75	35.25	40.75	27.75	65.75	41.5	19.5	47.25	39.75
5.5	28	33.5	49.25	28.25	67.25	46.25	16.5	41.25	38.25
6.75	35.75	45.75	67.25	26.5	62.25	53.25	38.5	66	38.75
16	39.25	49.5	68.5	32.75	102.75	53	40	82.5	51
22.5	61.5	64	71.75	43.25	119.5	55.5	26.75	89	45
20.5	56.25	59	66	27.5	100	52.5	27.75	82.75	44.5
21.75	63	53	69.75	46	116.5	56.5	36.5	80.75	43.75
17.5	48.5	47.75	69.25	28.5	101	51.75	39.25	70.25	51.5
18	47.5	45	62.25	39	95.75	48.25	42.75	72	49.5
19	54.25	56.5	63.25	29.75	100.5	46.75	26.25	73.5	43.5
20.75	62.5	57.25	62	33	108.25	47.25	25.75	76.5	41
18	48.75	47.25	73.25	49.75	92.5	49.5	38.25	65.75	50.5
16.75	50.75	51	60.5	27.75	113.25	43	26.25	77.5	40
14.25	48	51	56.25	36.25	92.5	43.5	37.25	75.25	47.5
12.75	52.75	48	60.25	36.25	105.5	45.25	25.75	77.75	43.5
12.5	50.75	53.75	72.25	32.5	100.75	49.5	34	83.5	54
10.25	40.25	43.5	57	38.75	106.5	32.25	29.25	77.5	57
16.75	53	59	65.75	49.25	95	60	27	89.5	46
18	61.5	65	59	35.25	92.25	58.25	25	90	49.75
14.25	56.75	54.25	48.5	36	101.75	49.25	24.75	84.5	37.5
8.25	44.5	46	45.5	30.75	86.75	44	19.25	57	40.5
7.5	37	37	48.75	30.25	62.25	40.75	21.25	47.75	43.5
5	34	41.75	49.25	31.25	61.25	49.75	23.5	44.5	50.5
2.25	22	32.75	45.5	37	46.25	43	22.5	39.75	35
2.5	31.5	25	34.25	31	40.5	43.5	25	38.75	35.25
4.25	18.75	34	32	26.75	42	44	19.5	31.5	40.5
3	27.75	32.5	39.5	30.5	69.5	36.75	18.75	34.75	40
3.5	20.75	26.5	38	24.75	38.5	44.25	14.75	24.75	38.5
7	22.5	22.5	42.5	28.5	78.25	41.25	16	59.25	36.75
2.25	18.5	24.75	38.75	28.75	53.75	41.25	15.25	53.25	39.25
4	20.25	31.25	32.25	30	54.5	41.75	15.75	36.25	34
5.75	18	24.75	34.25	27.75	69.25	45.25	14.25	54	37.5
4	21.25	32	33	29.25	37.25	37.75	20.5	28	36.75
7.25	27.75	51.25	39.75	28.75	45.25	41	19.25	47.25	44.5
8	32.5	39	58.75	28.25	50.5	47.75	27.25	92.25	43.25
8.5	30	29.5	52.25	20.75	38.75	45	37	70.5	44.5
7.5	24	31.5	51.25	18.25	30.25	38	27	62.75	51.75
8	27	31.5	49	20.5	31.75	36.25	23.25	98.25	52
6.5	24.75	27.75	42.75	20	43.75	40	18.25	86.5	44
6	28.25	49	35	21.5	50.75	43	21	58	39.75
5	35.5	50	36	21	38.25	39	22	35.25	35
8.5	39.75	57	42	23.25	55	51	22.25	50.25	43.5
7.5	42.75	73.75	60.5	22.5	70.25	54.5	32.5	79.75	47.5
9.5	44.25	59.75	51	18	73.5	73.5	24.75	83	51.5
4	30.75	48	36	24.75	53.25	52.5	15	55.5	46.5
7.25	38.75	51.5	54	19.25	40.5	57.25	14.75	61.75	40.75
4.5	27.5	50.75	37.5	19.5	41.75	41.25	13.5	38.25	41
7	40	52.25	54	29.5	48	54	34.75	61	49.25
6.25	26	43	36.5	23.5	45.25	39	23.25	45.75	44.25
9.25	31	56.25	44.25	28.75	52	52.75	25.25	66.75	51.25
8.25	31.75	59	46.25	21	32	41.25	20	73	41.75
9.5	13	42.25	38.75	39.75	51.25	39.25	31.5	39	52.75
3.75	24.75	53	36.75	31.25	42.5	41.5	13.25	26.25	38.75
6.75	22.25	41.25	38.75	27.75	44.75	38	21.25	25.75	36.25
10	46.5	60.75	53.5	26.25	58.5	49.5	24.25	75.5	53.5
8.75	27	41.25	56.75	33.25	54.75	48	24.75	78.75	46.25
8.75	22.5	32	47.75	26	49.5	42.75	23.25	70	50.5
6.5	24.5	29.25	38.75	25.5	46.75	40	18.25	50	44.75
4.25	24.25	32.5	48	25.25	41.75	39.5	18.5	63	42
5.5	22	31.5	43	18.75	39	36.75	19	68.25	47
5.75	32	40.5	42.5	25.75	41.5	40.25	19	61.25	40.5
13.5	52.75	57	79.25	30.75	99.25	64	44.25	93.25	77
5	25.5	46.25	33	17.5	41.5	52.75	19.25	43.5	39.25
6.25	31.5	67.5	40.25	19.25	44.5	44	19.75	46.75	43.75
5.5	22.5	64.5	42.5	25	45.25	33	21.25	39	38.5
4.25	29.5	48.75	35	25	37.25	33	11.75	48	43.25
3.5	24.25	39.75	36.75	26.5	32.75	35	15.75	35	39
2.75	16.25	46.5	34.25	27	33.5	36	12.5	28.5	33.75
6.75	45.75	58.25	52.5	25.75	60.75	50.25	33	85.25	55.75
6	33.25	52.25	47.5	20.5	75.25	52.25	19	55.25	53.25
6	38.25	35.25	34	25.75	30.25	47.75	14.25	41	38.25
4.75	31	63.75	50	23.5	47.5	52.75	18.75	60.25	40
5.25	22.5	36.75	32.75	28.75	46.5	40.75	17	27.25	39
5.75	23	46.75	39.75	26.5	50.75	40.5	13	31.5	38.25
7.75	31.75	50.5	47.25	35.5	47.25	35	31	53.5	54.75
5	28.5	53	38	29.5	43.5	43	19	35.5	41.25
5.75	27.25	65.75	43	28.75	41	37.75	23.5	42	39.25
5.5	37.5	41.75	46.5	24.75	37.75	38.25	21.75	60.75	44.25
9	37.5	58.75	52	25.75	44.75	52.25	21.25	66.75	48.5
7.25	43.5	52.5	51.25	24.75	50.75	52	28	65.25	43
6.5	37.5	51.75	51	17.25	56.75	54.75	29	66.25	44.75
9.5	41.5	56	48.25	23.5	60.75	56	29.75	81.25	51.25
7	37	60.25	62.75	20.25	63.75	56	25.5	80.75	41
9.25	37	55.75	57.25	22.5	61.25	59.75	30.25	79.5	48.75
5	37	44.25	37.5	22	40.75	47.25	23.25	61.25	43.5
6	41	57	50.5	21.75	72	65.25	27.25	89	49.5
7	41	56.25	49.75	19	61	69.25	25.25	70	46
5.25	28.25	58	40.5	21	55.75	56.5	18.75	62	38
4.75	25.5	49.25	39.5	21.25	47.5	47.25	13	53.5	40.5
4.75	33.25	40	36.5	20.25	41	49.5	16	66.5	43.75
7.75	42.5	64.25	58.5	25.5	56.5	55.75	22.75	80.5	43.5
10.25	47.75	57	59	28.75	67.75	56	32.25	84.75	49.75
7	34	48.5	44	21.25	43.25	51.75	16.5	89.75	44
10.25	43	49.75	57.25	21.75	54.25	57.25	34.5	76	42.5
6.5	27.5	38.25	33.5	15.75	51.75	52	17	75.5	36.5
4	32.5	35.75	43.5	28.5	52.75	45.75	16.75	41.25	42.5
4.75	30.75	38.25	46.5	25	67.5	43	18.75	40.25	39.5
2	18	36	37.25	25	43.25	45.25	14.5	29.25	33.25
5.5	24	50	39.5	27	37.75	44.75	19.75	34.5	41
4.25	23	58	36.25	29.25	36	42	13.5	41.25	36.5
5.25	27	50.75	27.25	33.5	38.25	42.5	14.5	37	36.75
7.5	34.5	62	56.5	34	55.5	53.75	34	51.75	49.5
8	37.75	64.25	51	24	49.75	43.75	23.25	63.25	41.5
5	27.5	42.5	34.75	24.75	39.75	38.5	18.75	50	38
3.75	23.25	46.5	36.75	24.25	42.75	34.75	20.5	34.25	33.75
3.75	22.5	36.5	41.5	30.5	43	36	17	29.25	38
4.75	18.25	47.75	36.5	26.75	32.75	32.5	15.75	51	39.25
5.25	29.25	49	41	23.75	39.25	38.25	36.75	63.5	43.25
6	27.75	45.75	42.25	24.25	39	38	19.75	35.75	37.25
3.75	26.25	39.75	35.5	30.75	45.5	35	19	25.5	39.25
7.25	33.25	43.25	53.25	31.5	37.25	35.75	41.25	69.25	46.25
4.75	33.25	46.75	64	24.75	47.75	36.25	22.75	45	42
6.25	27.75	51	45	33.25	36	32.5	26.75	47	40.75
5	33.25	56	44	30.25	53.25	36.5	23.5	42.75	36.25
5.5	40.5	48.5	52	26.75	49	44	27	60.5	46.5
5.75	35.5	58.25	48.5	23.5	53	49	24.25	65.5	46.25
4.75	21	40	44.75	31.75	43.5	38.5	17	33	36.25
7.5	38.75	61.75	54	29.75	54.5	47.75	28.5	77.5	47.25
10.75	41.25	58.5	61.75	30	56.5	48.5	30	82.5	58.5
6.75	30.25	54.75	59.75	21.75	56.5	61	32.25	70	40.25
10	41.5	53.25	53.5	26.5	73	64.75	34.75	84.5	43.75
8.25	42.5	46.25	55	25.5	51	53.5	32	77.5	41.75
4	31.75	49.75	41	21.25	46.75	54.5	26	55.75	39.5
8	40	61	55	27.75	63.75	58.75	26.5	76.5	45
10.5	41	46	48.75	20	53.75	57	31.5	69.25	43.75
8.25	37.75	50.75	48	20.25	59	71.5	31.75	65.5	43.75
10.5	36	53.25	56.75	16.5	61	66.25	39	82	49.25
8.5	37.75	54.5	54.5	21.75	71.5	63	29.5	76	50.5
5.25	31	49	54.5	23.75	65	57.75	24.5	67	39.75
6	34.25	51.5	44.25	16.75	54.5	53	23.5	80.75	55.75
9	43.5	42	57.75	23.25	61.5	57.75	23	75.25	49.5
6.25	32.75	65.5	57.25	22	66.5	69.25	27.75	75.75	41.25
4.75	26.5	46	43.25	23.5	44.75	55	15.75	69.75	34.5
12.25	39	47.75	67	24.5	102.25	60	42.75	86.75	72.5
4	29	62.5	44.75	18	45.5	58.75	15.25	60.5	44.5
3.5	26.5	37.25	36.5	22	37.25	41.25	16	59.5	43.5
6.75	35.5	54.25	51.5	26.5	44.5	55.75	27.75	78	48.25
6.25	25.75	47	40.75	15.75	35.5	49.25	15.75	80.75	38.25
6.75	40.75	53	44.5	20.75	47.5	51.25	22.25	75	51.5
10.25	43.5	60	57.75	26.75	78.5	64.5	22.5	89.25	48.75
9.75	37.25	52.25	51.75	23.25	63.25	67.25	34.75	90.75	48.25
7.25	33	52.5	47.25	23.75	47.75	61.25	24.5	69.75	42.75
5	32.75	45	53.25	17.5	49.5	55.75	22.25	74.25	44.75
7.25	41.25	50	55	18.75	65	66	30	88.25	48.75
5	35	51.25	41	20	43.5	57	16.75	70.5	39.25
4	38	42.25	41	22	49.75	62	16.75	67.25	41
6.5	30.75	47	41.75	20.75	38.5	55.75	15.75	56	36.75
4.25	25.5	57.75	31.5	34.25	39.25	42.25	14.75	37	42.5
4.5	20	42	38	31	43.25	45.25	15.25	27.5	37.5
3.5	23.25	36.25	37.75	36.25	39.5	45	22.25	26.75	36.25
6.5	33	54.5	58.25	32.25	69	60.75	32.25	82.5	53.75
5.5	38	50.25	61	20.25	56.5	72.75	24.25	63	42
7.75	36	54.75	55.25	23.25	71.25	64.75	29.75	68	46.5
5.5	37.25	48.75	49.25	20	42.75	62	23.5	73.25	44.25
10.75	38.5	54.75	63.25	23.75	58	68.25	29.25	75.75	47.25
8	32.5	43.75	43.5	18.25	46	64.5	23.75	68.75	47.5
8.5	36	38.75	49	15.5	47.5	54.75	20	61	49
6.75	35.75	42.75	55.5	24.75	36.5	50.25	25.25	59	43
6.25	28	30.75	50.25	24	56	55	21	50.75	37.75
7.5	32	38.75	46.5	32.5	52.25	58.75	23.25	53	52.5
6.75	33.5	63.75	47.5	24.25	52.25	56.5	29.25	52.25	44.5
4	20.25	31	37.25	29.75	34.25	46	19.5	27.75	35
8.5	32.25	62	49.5	29.5	54	56.25	33	65.75	51.25
8.25	36	55	49.25	22	60.75	64.5	25.75	73	54.25
8	35.75	56.75	58.75	23.5	57.5	61.5	24.75	54.75	40.5
5.5	23.75	44.5	35	21.75	41.5	55.75	24.75	41	38.25
7	40.75	50	51.25	31.25	56.75	56.75	30.5	61.5	44.5
4.5	28.75	48.5	39.25	26.25	50.75	62.75	25.5	48.5	54
3.25	21.25	39.75	39.75	23.5	43.5	53	14.5	37.5	32.75
5.5	32.25	34.5	41.25	27.75	36.75	53.25	24.5	64.5	49.25
6.75	34	53.75	54.75	20.75	83	83.25	33.75	87.25	65.75
8.25	36.5	49	48.75	10.75	77	67	25.75	89.5	66.25
6.5	25.5	45.25	40.75	17.75	46.5	51.75	13.75	87.5	45.75
5.25	15.25	31	33.25	16.75	56.5	53.25	22	69.5	51
4	8.75	22.75	27.25	17.75	38.75	33.25	19.25	48.5	47
5.5	24.75	38.75	40.25	14.25	50.25	62	18.25	66.25	52.75
6.5	19.25	28	40	24.75	45.25	47.75	16.25	75	50.25
3.25	26	36.25	37.25	25.75	51.25	54.5	21.25	69	49
4.75	20.5	36.25	39.75	19	67.25	84	25.75	73.25	52.25
4	18.25	32.25	26.25	24.5	38.25	53	9.5	50.75	36.25
3.5	18.75	44.25	32.75	25.5	44	45	15	46.25	38.5
4	13	31.75	31.25	26.25	32	45.25	8.75	33.5	30.25
5.5	27.25	59	44	20.5	55.5	66.5	22.25	63.25	43.75
4.25	16.25	30.5	30.5	27	31	55.5	9.25	38	36
4.5	17	32.5	42	24.75	45.25	56.75	14	101.75	40
5.75	21	35.5	38.5	32.75	63.25	61.75	16.25	84	49.75
8.25	20.75	30.5	33.25	25.5	63	50.75	14.75	85.25	40
11	28.25	42	57.5	26.25	73.5	75.25	23	103.5	48.25
7.75	28.5	39.75	36	29	62.25	48	19.5	89	46.75
5.25	24.25	28.75	30.75	25.25	59.5	62.75	15	89.5	42.75
6.25	19.5	43.25	43	23.25	52.5	69.25	21.25	80.25	46.75
7.25	23	39	38.5	25.75	54	50.75	15.25	93.75	36.5
5.75	21.5	31.75	30.25	27.75	47.25	45.25	12.5	99.25	44.75
1.75	23.5	39.5	24.25	27	47.25	46.25	15.75	51.25	35.5
9.75	43	51.75	57.25	28	75.5	73	26.25	78	40.5
5.75	32.75	58.25	46	21.5	46.5	56.25	18.5	71	45.5
4.75	30.25	48.25	41.75	18.5	51.5	71.25	15.5	64.5	41.5
2.25	17.5	36	25	24.5	42	47.5	14.75	45.25	36
3.25	36	51.5	45.5	24	58.25	62	22.75	77	46.75
5.25	22.25	42.25	26	17.25	45	60.75	7.75	46.75	31.25
4.25	18.75	36.75	27.75	25.5	44	47.75	12.25	39.25	30.5
5	22.75	54	34.25	26	43	43.75	14.5	48.75	32.5
8.75	33	47.5	46.5	20.5	74.5	59.25	30.75	89.25	48.75
4	20	34	41.75	21.25	55	57	13.25	114.75	54.5
4.5	17	24.5	45	22	72	54.25	25.25	108.25	58.25
1.5	7.25	11	16.75	12.75	36.25	40.25	8.5	41	30.75
0.75	6.25	10.5	18.75	8	32.25	38.5	9.75	41.5	32
1	7.5	12	16	10.25	29	41	14.5	30.75	20.75
11.25	31	45.5	52.75	31.5	77.25	63	32.75	84.75	49.75
7.75	21.75	29.25	48.5	28	70.75	62	29	78.75	42.5
8.5	25.25	36.5	51.5	28	76.5	66.25	23.75	105.5	42.5
6.75	20.75	37.25	42.75	23.75	41	53.25	15.5	100.75	36.75
9	32.5	38	52	32.75	78	68.5	28.75	96	53.5
7.5	27.75	37.5	46	27.75	77.75	56.5	26	79	44.5
9	28.25	37.5	50	34.5	80.5	62.5	29.5	76.5	41.75
9.25	25.75	39	45.5	40.25	80.75	62.75	27.75	98.5	49.25
9	22	39	44.5	28	49.25	65.25	18.5	93.25	47.75
8	19.25	31.75	40.75	26.25	73.5	62.5	22	87.5	36
9	25.5	35.75	41.25	24.25	61	57.5	17.75	82.5	37.25
9.25	22	37	49.5	27	71.25	55.5	24	79	46.75
8.25	19.25	37	42.25	20.75	60	54.5	19.75	97.75	42.5
6	15.25	28.75	35.75	19	35	56.25	14	98	43.25
4.25	18.75	27.75	31	27	46.5	59.75	18.25	98.75	47.75
7.75	26.25	31.75	37.75	28	71	50.75	25	103.5	42
4.5	19.5	35.25	48	23.5	70.75	50.25	23.5	114.25	55.75
4	20	26.75	33	19	65.75	45.25	17.25	96.25	50.25
6.25	25	33	40	25.5	62.25	61.5	25.75	108.5	41.25
6	19	28.25	37.5	27.25	58.5	48.25	17.25	86.75	52
5	23.75	34.5	34.5	23.25	54.75	48	20.5	75	43.25
5	21.25	31.25	46.25	37.25	59.5	54.25	20.5	109.5	48.5
7.25	25.25	30.75	53.25	27	71	64.25	23	89.25	50.75
5.75	15	20.75	47.5	20.25	47.75	52.25	19.75	103	42.75
5	21	23.75	34	25	52	50.75	16.75	95.5	53.5
7.75	25.75	35.5	38	26.75	64.75	47	16	85	41.75
10.25	26.75	45	46.75	37	40.75	50.75	21.75	86.75	45.25
8.25	19	45.75	46.75	30.75	42.5	60.25	19.25	77	40.25
5	20	40.25	37.25	14.75	33.5	51.75	14.25	69.5	44.5
6.75	23.75	35.75	48	16.75	45.25	52.5	17	81.75	41
5	26.25	34.5	49.5	32.25	57.25	50	23.75	63.5	47.25
6.75	17.75	24.5	35.5	26.75	59	58.25	21.25	56	41
6.25	25.75	34	50	35	57.25	58.25	27	72.75	39.75
10.5	23.25	29.75	49.75	28.5	56	47	19	80.25	51
6.5	24.5	35.5	29.25	14	43	58.5	17.5	55.5	38
5.75	26.75	39.75	45.25	38.75	45.5	54	17.5	60.75	45
4.25	20.75	27.25	35	14.75	50	61	26.75	60.75	32
1.5	26.5	25.75	42	13	36	46.5	17	61.75	32.75
5.25	22.75	27.25	36.25	13	51.5	55	19.25	47.5	30
5.25	22.25	39	40.75	19	27.5	40	15.75	95.5	38.25
4	12.5	32.75	35.5	8.75	47.5	54	17	77	50.75
4	11	27.25	31.75	8.75	48.5	61.75	20	62	50.5
3.5	17	35	51.5	12.75	53.25	45	18.25	96.75	48.25
5.5	23.75	35.5	51	19	54	55	19.5	105.75	39
3.5	15.75	40	39.25	13.25	56.25	46.25	16.25	85.5	36.5
4	23	29.25	34	13	40	55.25	12.5	86.5	49.25
4.5	22	37	40	21.25	59.75	58.75	21	90	45.25
3.5	11.75	35.25	30.75	9.25	55	53	18.25	79.75	41.75
6.5	23	38.25	42.75	20.75	61.25	53.25	21	79.5	33.5
5.25	22.75	26.75	44.5	50.25	59	50.5	24.75	72.5	38
4.25	18	26.5	35.25	15	55	54.75	20.5	53.25	35.75
4.25	21	29.5	42.25	21	55	56	19.5	83.75	36.5
3.25	16.5	29.75	33	9	51	41.75	13.25	51.25	31
7.5	23.5	32	46.5	36.75	45.25	49	15.75	105.75	33
6.5	26.5	26.75	41.25	45	57.5	52.5	24	70	34.75
6.75	26.5	24.75	46.25	26	50.75	52.75	12.5	95.5	39.75
7	23.5	36	49	25.25	65	60.5	17.25	95.25	45.75
5.5	27.25	40.75	53.5	45.5	61	68.75	28.25	87.5	55
6	26.75	30.25	43.25	12.5	54.25	55	17.25	95.75	35
4.5	20.25	23.5	44.75	24	68	51.5	23.5	61.25	46.25
7.75	30.25	37.75	50.25	28.75	97.5	66.25	29	78.75	47.5
9.75	35	39	50.75	23	84.5	76.75	23	65.75	45.25
17.5	48.75	58	57.75	29.25	124.5	55.5	21.25	98.5	44.5
11.25	37	44.25	57.25	31.75	90	70.25	23.5	73.5	42.25
9	35.25	38.25	52.25	20.25	92.75	61.5	16.75	67.25	40.75
8.75	24.25	38.5	49.5	27	72.25	70.5	33	77.5	42.25
7.75	34	39.75	53	24	94.75	64.25	32.5	83	40
9.25	41	42	45.5	35.5	82	60.5	19.5	89.75	36.25
8	23.25	29.75	36.5	46.25	44	45	28.75	56.75	46.75
4.75	9.5	24	24.25	35.75	34.25	32.25	30	25.75	42.75
9.5	25	39.25	42.25	39.75	78	44.75	14.75	45.5	41.75
7	41.25	53	51.25	37.5	69.5	60	24.25	84.25	51
4.75	33.25	36	46.75	26	46.5	57.25	18	81.75	48.25
6.25	45.5	42.25	52.5	25.75	40.5	46.75	22.5	115	49
6.5	31.5	43.5	35.75	22.5	59	53.75	20	67.25	31.75
7.25	38.25	43.5	42.25	22.25	55.5	62.5	38.25	68.75	47.25
8.5	25.5	41.75	47.5	33.25	42.25	62.25	26	87.25	45
9.75	34.5	47.25	61.5	23.5	68.75	80	30.75	96.5	56
5.5	31.5	36.25	44.5	15.75	63	76	27.5	79.75	48
4	29	41.5	26.25	27.25	53.25	56	15.5	54	38.5
4.75	21.5	34	28.25	31	37.75	52.5	13.5	35.5	40.5
4.5	24.75	36.75	34	28.25	39.75	45.75	19.25	40.5	35.25
6.5	35.75	55	57.75	15.75	110.25	69.5	37.75	103.5	75.75
6	24	35.75	40.75	21.25	51	55.75	18	64.25	41.75
5	29.25	33	55.25	23.5	54.75	57	25.25	97.5	50
8.5	28.25	43.5	53.5	19.5	81.75	68.25	29	74.75	49.75
7.25	25.75	32.25	47	25.25	66.5	64.25	28	64.25	53.25
5.75	21.75	36.5	43.75	29.25	37	64.25	23.5	59.25	40.25
4	25.25	28.75	32.25	22	46	60.25	16.75	34.75	40.25
6.25	23.75	35	34	27.5	42.25	54	20.25	54.25	44
2.75	18.5	33.75	27.75	29.75	43	49	13.75	39.75	35.25
4.75	17	43.25	26	26.5	49	49.5	13.25	51.25	38.25
6.75	38.5	51.75	54.5	20.5	99.5	59	24	74.25	63
5.75	28.25	40.25	43	17.25	64.75	57.5	24	71	65.5
4.5	23.25	30	43	18.5	56.5	83.25	24.5	49.5	48.25
5.25	16.25	26.25	36.5	20	36.25	61	16.75	58.75	38
4	20.25	29	26.25	28.75	49.75	55.25	15.25	40	38.5
6.5	22.25	31.75	31	23.5	46	57.5	24.75	62.25	42.5
4.25	25	31.5	30.5	16	52.25	64.25	14	77.5	32.75
3	19.75	31.5	39.75	20.25	58	78.25	24.75	64	46.75
4.25	13.25	31.5	37.25	15	37.25	52	16.5	65.25	36
5	21.25	28.75	29.75	25.25	41.25	62.25	13.75	61.5	39.5
4.25	14.75	30	31.75	18	44	65.25	19.25	63.25	35.5
4.75	27.75	38	46	13.25	44.5	51.5	17.75	111.25	40
5	22	36.5	51	15.5	48.5	44.25	14.75	121.25	47.75
6	18.25	32.75	31.5	22.25	59.25	55.25	16	93	34.5
3.25	23	31.25	29	24.25	35.25	63	19	40.75	33
4.75	16	34.5	28.25	22.75	43.25	46.25	10.5	53.75	37
6.5	20	33.75	37.75	24.75	44	64.25	18.5	59.25	43
4.5	18.5	31.25	36.25	22	42.25	75.25	22.75	64.25	39
5.25	28.75	27.25	34.75	23	37.75	53.75	17.5	109	34.25
3.75	20.75	31	26.25	25.25	38.75	50.25	9.25	52	31
4.25	19.75	28	37.25	22	32.75	51	15.25	77.75	33
2.75	23.25	26	39.75	36.75	58	51.5	20.25	78.75	45.25
5.25	19.75	29.5	37.75	42.5	62.25	53	20	84.5	35.75
5.75	25.5	28.25	37.75	36.25	57.25	59.75	21.75	70.5	44
4.25	17.25	33	34.75	17.5	49.75	69.75	23	65.25	43.75
5.5	16.5	28.5	36.25	18.75	49.75	60	19.25	95.75	37.5
2.25	20.25	29.75	30.5	24.5	45.5	44.25	10.5	73.5	27
6.25	30.5	47.5	39.5	20.5	80.5	50.75	18.75	71.25	47.25
7	24	30.75	54.25	10	98.75	60.75	36	64	65.25
5.25	15.75	36	24.75	21.75	34.75	58.25	8.25	45.25	32.5
3	18	38.5	27.25	26.25	46	55	9.25	45	36.5
2	12.25	25.25	24.75	23	62	42.25	10.5	53.75	33.25
1.25	6	8.25	16	12	25	33.5	6.75	38.75	23
3.25	7.25	20	16.25	26	33	40	21.75	26.25	25.5
1	6.75	13.25	16	10.5	37.25	35.5	7.5	32	19.75
3.25	16.25	21.5	23.75	22.5	30	41.25	25	21.75	27.5
2.25	6	18	12.75	15.25	27.75	32.75	14.5	33	23.25
1.75	5.75	11.75	13.75	10.75	37	34.5	9.25	26.75	24.25
2.75	6.5	19.25	11.75	10.75	32.5	29.25	14.75	12.75	20.75
3	11.75	30.75	18.75	12.25	25.25	44.25	22.75	34.75	25.5
3.5	5.5	10	18.5	19.75	33.75	36.5	19.25	15.75	27.75
2.25	12.75	21	15.5	10.25	26.75	31.5	14.25	14.5	20.5
1.25	8	16.5	12.5	11.75	23.75	33	17.5	17	24
1.25	4.5	10.5	10.25	8.25	25.25	29.25	13.75	16.5	20.75
2	4	16.5	11	16.5	32	36.25	10.75	17.5	25
2.5	5.5	14.25	8	9.75	28.5	33.25	10.5	27.5	24.25
2.5	7.25	21.75	14.5	16.5	37.25	35.5	16.25	27.5	24
1.5	4.75	10.75	19.25	19.5	36.75	33	28.25	13.25	27.5
4.5	9.75	18	16.75	26.75	35	39.75	17.25	19.5	15.5
2.5	8	16.5	7.25	7.75	23.5	23.5	8.5	19.75	26.75
1.25	4.75	10.75	11	10.5	26.25	32.25	9.75	27.25	22.75
1.75	4.25	15.25	12.75	11	20	28.5	8.5	26.75	20
1.5	4.75	9.75	20.25	22	31.25	42	18.5	18	24.5
1.75	4.75	12.25	17.75	16.75	41	39.5	20	13.25	25.75
1	5.75	15.75	9.25	18.75	27.75	28.5	7.25	22.25	18.25
2.25	5.25	7.25	8.5	9.75	27.75	33.25	8	9.5	23.75
2	10.5	10	13	8.25	33	35.75	21	16.25	25.25
1.75	9.5	14.25	21.5	18	28.5	40.5	19.25	18.75	26.75
1	3.5	7.75	7.75	17.5	27.5	26.5	9	15.5	14
1.5	4	11.5	10.75	15	31	35.5	14.75	15.75	28.75
0.5	7	14.25	8	12.25	29	30.25	7.75	24.25	23
0.25	2.75	5.5	5.25	10	29.5	40.25	9.25	19.75	19
2.25	7.75	15	18	17.75	29.75	38	18.25	25.5	26
0.75	4.25	15.5	9.75	6	16.25	28.75	5.75	22.5	15.5
3.25	7	13	21.5	14.25	34.75	33.5	17	24	24
1	1.75	4.75	12	16.25	34.25	31.75	9.5	19	21.75
2.5	9.25	9	17.5	14.75	31.75	33.25	12.75	25.25	24.5
1.5	6.25	16	13.5	10.75	25.5	37	11.25	29.5	22.5
2	8	13.5	12.75	11	25.75	38.5	16	24.25	25.75
1.25	5	7	10.75	8.75	23.75	25.25	8.5	26	21.5
1	3.75	8.5	13	23.5	31.5	37.5	14	16.5	25.25
0.75	5.75	9	17.25	12.25	32	25.5	15.5	9.75	21
1.75	4.5	18	13.25	9.5	24.25	21.25	12.25	8.5	20.5
0.75	5.5	9.25	9	10.75	28.5	29.75	9.75	17	22.25
1.5	11.25	15.75	11	7.25	21.75	27.5	13.25	24.25	12.75
1.25	5.25	7.25	6.75	7.5	25.5	27.75	11	18.75	22.25
1.5	3.5	6	6.75	13	25.5	23.25	9.75	11.75	19.5
2	6.5	15	12.75	18	34.25	43.75	16.5	16.75	24.25
0.75	3.5	10.5	7.75	4.25	23.75	20.25	5.5	11.75	11.75
1.75	6.75	13	9.25	7.5	30.25	32.25	4.5	25	21
1	6.5	11.5	11	12.25	31	28	14.5	14.25	17.5
1	4.75	8	10	12.75	23.5	25.5	9.5	13.25	21.5
2	9.5	16	21.75	18	33	31.5	24	21.25	25
0.75	3.5	5	6.75	6.25	23.25	20.5	3.25	20	17.25
1.75	6.5	11.25	11.5	9.25	22.5	25	8.5	13.75	17
1	5.5	9	7	12	28.25	37	10.25	10.5	21.5
1.25	4.25	12	13.5	13.75	27.25	33.25	12	20.75	27.25
2.25	7.25	8.75	16.25	12.25	28.5	32.5	10.5	24	18.75
1.75	6.25	9.75	16.75	13.75	29.75	25.75	12.25	29.25	22.25
0.75	3.75	9.5	11.75	13.75	29.5	27.25	5.25	24.5	14.5
1	8.5	16	18.5	17.75	51.5	44.25	4.75	37.25	27.25
1	3.5	10.5	11.75	8.5	22	31	5.75	26.25	17.25
0.25	5.75	10	9.5	12.5	37.75	31.5	14.75	15.75	23.25
0.25	4	8.25	14	16.75	36.25	33.5	19.25	19.75	18.5
1	8	13.75	13.25	11.75	27.75	26.75	10.75	19.75	14.75
0.75	5.5	7.5	17.25	18.25	34.75	30	16.5	11.5	23.25
1.5	5	10.25	8.75	12.75	28.5	24.25	10.5	26.25	17.75
0.75	4.25	7.25	8.75	10	28.5	26.5	8	21	19.25
1.75	6.25	12	13.75	20	35	28	17.5	18	28.75
1.25	5	7.5	12.5	8.25	21.75	26.25	6.5	24	16.75
1.25	5.25	13.5	7.5	8.5	31	24.25	11.5	11.75	23.5
0.25	4.75	9	7.75	7	20.75	26.25	6	10.25	12.75
0.75	2.25	6.75	9	10.75	24.25	27	6.25	12.25	14.5
0	8	9.5	8.25	9.25	24.5	26.5	12.5	11.5	18
2	11.5	15.25	19.5	11	29.75	30.5	14.5	23.75	17.75
2	5.5	9.75	18.25	11.25	31.75	31.75	12.75	19	22.75
0.75	4.25	6.75	9.5	12	22.25	24.25	7.75	13.5	21.25
1	5	4.5	8	11.75	22	23.75	9	12	18
1.75	6.25	12.5	11.25	7.5	21.5	21.5	8.5	17.25	12.75
1	3.5	8	13.75	17.5	24.75	23.25	11	17.75	20.5
0.5	5.5	9.25	7.25	10.25	23.75	20.25	5	23	18.25
1.25	5	5	7.25	6.75	23	26.25	5.25	13.25	18.5
3.25	8.25	16.5	23.5	20.25	49	41.25	22.75	25.75	33.5
1	6	12.5	17	11.25	31.5	33.25	14.75	15.75	22.5
1	6.25	11.5	11.75	15	24	26.75	8.5	19.75	17.75
1.75	8.5	16.5	15	7.5	23.5	26.25	6.25	29.25	17.25
1	6.25	9.25	15.5	9	25.75	33	10.25	30.25	19.5
1.75	5.5	6.75	15.25	17.25	34.25	35.25	11	20.25	23
0	4.5	5.25	15.5	11.25	22.75	24	10	20.75	17
[truncated: 41,201 more rows]
