# Supplementary material for: Global sleep homeostasis reflects temporally and spatially integrated local cortical neuronal activity
Source: eLife. 2020 Jul 2;9:e54148. doi: 10.7554/eLife.54148 (PMC7332296; doi:10.7554/eLife.54148)
Supplement: Figure 1—source data 1. [file elife-54148-fig1-data1.zip › Figure 1/Firing Rates/Firing-Rate-Mouse-5.csv]

LFP 1	LFP 2	LFP 3	LFP 4	LFP 5	LFP 6	LFP 7	LFP 8	LFP 9	LFP 10	LFP 11	LFP 12
26.25	27.25	14.5	5.5	20.5	22.25	30	18.25	27.25	21.75	16	19.5
52.5	38.25	13.5	8.25	32.75	22	36.5	26.75	34.75	16	19	20.25
23.75	26.5	12.75	3.5	20.5	13.75	28	20.5	30	20.75	18.75	23.75
35.75	27.75	11.75	9.25	10.5	26.25	28.5	29.75	40.25	25.75	18.75	22
37.75	34.25	9.25	5.5	20.5	13.5	35	25.5	33.5	13.25	15.25	21.75
33.25	26	12.5	8.5	14.5	16.5	41.75	22.5	47.25	21.25	20	19
36	25	11	5.5	20.5	18.25	31.5	18.75	25.5	17.25	9.5	21.5
28	24.5	8.25	5	15.75	15.5	27.25	24.25	28.5	20.75	15	17.5
31.75	26	12.25	8	14.75	18	17	23.5	31.25	14.5	15	18.25
37	31.25	17.75	5.25	8.25	16.75	25	20	46.25	23	15.75	17.5
36.25	27.5	12	4.75	19.25	16	32	23.25	32.5	20.25	13.5	22.5
33.25	26	18.25	5.75	14.25	20.25	31.75	21.25	33	16	14.25	20
40	29.5	9	2.75	14.75	14.25	34	23.25	35.75	17.75	16.25	20.25
25	21.75	9.5	2.75	16	12	29	13.75	20	8.75	11.5	14
27.75	24	10.5	3.75	15.5	13.5	24	15.75	23.75	18.5	13.75	22.5
38.25	34	17.75	7	18.25	18.25	25.75	27	33.75	25	18.75	17
35.75	22.75	11.5	4	11.25	15.5	22.75	21.25	37.75	26.5	13.5	15.75
33.25	31.25	17.5	7.75	17	16	30	24	32	19.5	13	17.5
19.5	23	14	2.75	18	14	35.75	15.75	25.75	15	11.25	17.25
45	32	14.25	6.25	19.25	20.5	26.75	24.25	32	25	17.5	17.75
61.25	35.5	18.5	7	24.75	17.75	43.5	23	47.5	20.5	19.25	23.25
35.75	29.75	10	8.25	16.75	20	49	26.5	42.5	21	28.25	18
23	29.5	10.25	4.25	15.5	17.25	34.5	18.75	24	14	15.75	18.75
34	25	13.25	5	12.5	13.25	26.5	23	30.5	13.5	13.25	15.25
37.5	31	19.5	7.25	15.5	20.75	25.75	23.25	40.75	25.25	20.25	19.75
21.25	20.75	8.75	4.5	19.75	15	38.5	19.75	31	11.75	14	20.5
42.25	32.5	12.5	3.5	20.25	13.75	39.5	22.75	28.5	19.75	17.5	20.5
35.25	23.5	14	7.75	17	16.5	28.75	30.25	43.5	30.25	26.25	22
34.25	23.25	20.25	4.25	17.75	16	31.75	24.75	36.25	22.75	12.75	21
20.5	27.25	12.25	7.25	16	19.75	40.75	20.25	31.5	19.25	20.25	19.75
20.75	28.75	10	5	18.25	17.75	44	21.75	25.5	15.25	24.25	20.25
43.75	32.75	12.5	6	19	15	29.5	37.5	39.75	18	29.5	19.25
39.25	34	14	4.5	18.75	8.25	39.5	21.25	30.5	18.75	15.75	18.75
33.5	23.25	12.25	4.25	16.75	15.25	25.5	27	33.25	23.25	19.75	18.25
31	20.5	8.75	2.75	14.25	11	29	18	25.75	11.5	11.75	18
26.25	21.25	19.5	4.5	16	15.75	24	20.5	40.25	15.5	13	17
21.75	19.25	10	2.5	20.5	17	35.5	16.75	21.75	13.75	8.5	20.25
30.25	29	10.5	6	18	23	30.5	16.5	23.75	13.25	11.5	16.5
43.25	29.25	18	7.25	19	17	37.5	27.25	49.5	18.25	23.25	20.5
41	24.25	15.25	9	13.5	16	42	31.5	46.25	23	25	22.75
35.25	22.25	15.25	7.25	22.25	14	31.25	18.25	24.75	16	28	16.5
36	28.5	18.75	8.5	17	23	24	16.5	35.75	20.25	21.75	20.25
23.25	21	7.5	2.75	13.25	9.25	24.5	16.25	30.5	9.25	14	12.5
32	27.5	15	4.75	15.25	16.75	32.75	11.25	22.25	17.75	10.75	20.25
25	21.5	11	4.75	19.75	13.25	27	19.25	28.5	17	13.5	17.5
18	21.5	11	2.75	14	10	30	14.25	30.5	7.75	13.5	12.25
39	28.25	13.5	5.5	13.75	15.75	34	27.5	38	14	15.25	20.25
59.25	39.25	21	10.25	18.75	25.5	39.5	19.75	39	28.25	15	21.25
38.25	30	17.75	6.75	19.75	16.5	42.5	33.5	41	20.25	29.25	21.5
57.5	38	20.5	7.5	24.25	14.75	36	26.75	45.5	24.75	21.75	20.25
33.75	28.25	12.5	2.5	19.5	10.5	23.75	18	23.75	16.75	14	19.5
32.25	17.5	13	6.5	17.75	17.25	31.5	25.75	39.25	18	19	29.25
52.5	33.25	18.75	9.25	19	21.5	43	30.25	41.25	23.25	28.5	21
52.25	33.5	14	10.5	20.25	18.5	43.25	30.25	44.75	23.25	26.75	20.5
34.5	23.25	11.25	10.25	17.25	11.5	40.5	22.75	28.75	17.5	28.5	17.5
12.5	23	3.75	2.75	7.5	11.25	26.75	17	19	10.75	11.75	15.75
35.25	24.25	12.5	3.5	9.5	16	25	16	26.75	16	12	17.75
30.5	27	11.5	4.5	15	10.5	29.5	17.75	30	17.25	14.25	23.75
27.75	25.75	11.75	4	18	11.75	31.25	14	30.5	16.5	8.25	20.25
30.75	26.5	11.5	6.25	17.5	14.5	39.25	18.75	35.5	22.75	13.5	20.75
22	22.75	12.25	4	10.75	15.5	23.75	19.25	29.5	16.25	12.25	19
43.25	32.5	18.25	7.75	22	15.75	22	28	47	18	22.25	16.25
24	25.75	10.25	5	29.75	12.25	36.5	15	18	11.75	11.75	18.75
26.5	19.5	10.25	6	15.5	17	36.5	21.75	40.75	18.75	21.5	21
40.25	40	15.25	7.5	18	18.5	36.75	23.75	35.5	18.75	18.25	13.5
42.5	23.75	11.5	8.5	15.75	17.25	39.25	28.75	46.75	17.5	27.25	18.5
45.25	31.75	17.75	10.25	22.25	17.5	30.25	28.5	41	15.75	19.75	21.5
44	33.5	14.25	7	16.75	16.5	41.5	24.75	41.25	20	23	20
26.25	26.25	9.5	6	20.75	19.75	45	19.5	30.75	22	19.25	17.25
34.5	31.25	13	7	27	19.5	55	24.25	31	19.75	28.25	29
40.5	31.5	15.75	10.25	20.5	16.5	34.25	31.5	40.25	20.75	27.5	16.5
23	25	10.75	4.75	14.5	8.25	14.25	18.25	29.25	15.5	10.75	16.5
22.25	24.25	8	3	8	13.25	25.5	16.25	31.25	11.25	12.75	16.75
40.25	37	19.5	7.25	15.75	11.75	20.5	19.75	31.25	23	19	18.75
29.25	23	11.25	3.5	11.25	15.75	24.5	13	39.75	16.75	13.75	18.5
21	24.75	9	3.75	20	15.5	41.5	11.25	18.75	15	9	21
34.75	28.5	18	3.5	20.5	16	21.25	18	31	13.75	16.25	20.5
36.75	36.75	10.5	5.25	15.75	13	34	22.25	35.5	11.75	18.75	10
39	29.75	15.25	6.25	16	12	30.75	18.25	44.5	20	14.5	17
38.25	29	12.25	4.5	14.5	14.5	37.5	19.25	35.5	16	16	19.5
34	25	12.75	3.25	16.75	15.5	34.5	13.75	28	14.75	12.75	22
29.5	21	11.25	5.25	23.25	15.5	30.75	21.75	28.25	15.75	22.5	19
24.25	22.25	8	8	12.75	12.75	34.75	21.25	27.75	19.75	18.25	16.25
24.75	23.75	8.5	4	11.25	15	35	28.5	29.75	19.5	22.25	25.75
41.25	30.5	18.75	11	23	17.25	41.5	28.5	37.75	25	31	21.75
29.75	30	11	2.75	15.75	11.5	33.25	17.75	29.75	16.5	15.5	15.5
32.75	29.5	6	5.25	15.75	14.5	27.5	16	26.25	17.75	17	19.25
35	30	10.75	1	14.5	8.75	20.75	21.75	32.25	18.75	15.5	12.25
23	21	6.25	3	11.25	10.75	25.25	23.5	30.25	22.75	8.25	19.5
47.25	40.75	14	4.25	18.75	17.75	26.25	26.25	40.5	17.25	15.75	19.25
21.25	20.25	10.5	4	13	18.25	32.5	19	35.25	14.5	18.25	18.25
27	29.25	11	5.25	14	15.5	34.75	12.75	31.75	20.25	16.75	20.75
48.75	38.5	18	5.25	23	18.5	25.75	22	31	14.25	14	18
20.5	18.5	7.25	4.75	25	18.75	30	18	22.75	14	12.75	19
67.25	45.5	28.5	11.75	26	19.5	38.25	29.25	61.5	35.25	27	25
25.5	29.25	9	5.75	19.25	14.75	41	15.25	27.5	15.5	14.25	18.25
22	29.75	10.25	8.25	25.25	25.75	51	19.75	35	13.75	28.75	24.75
30	38.5	12.75	8.25	17.5	13.75	36.75	23.75	26.25	16.5	17.25	14.75
36.75	38.75	9.25	6	14.75	11.25	26.5	19	31.75	15	17.75	15.25
45	37.75	14.25	5.5	23	23.5	42	19.5	18	19	20.5	20.5
22	33.5	8	5.5	17.5	9.25	25.75	20.25	20	14	18	17.5
32.75	23.75	13	5.25	18	19.25	31.5	14.25	24	19.25	14.5	19.75
38.25	27.5	14.25	5.5	15	22.75	30.25	30.75	45.5	16.25	16.75	20.5
53.25	32.5	18.75	7.5	21.75	17.25	42.5	23.25	42.25	28.5	15	21
27	28.75	12.25	4	25.5	17.25	30.25	30.25	27	15.25	10.25	18.25
47.25	30.25	17	6	17.75	14.25	29.75	20.5	41.25	21.75	17.5	19.75
32.5	22.5	12.25	5.5	15.75	20.25	36.5	29.25	48	22.25	15	18
25	29.75	10.75	6	18.5	17.75	34.75	20.25	26.25	15.75	13.5	16.75
31.5	29.25	16.75	4.25	24.25	16.75	38.75	20	30.5	15.25	14.25	22
45.75	32.5	16	5.5	17.5	17.5	36.75	28.5	39	15.5	18.75	22
41.75	35	16.75	7.75	14.5	15.5	37.5	30.25	42	25.75	24.25	19.25
37.75	30	12.5	8.75	21	19.5	38.5	26	44.75	19.5	20.5	17.5
28.75	22.75	12.75	4.5	18	10.5	26.75	18.5	28.75	14.25	11	17.75
23.75	25.75	13.5	4.75	29.75	10.25	36.25	22.75	30.25	17.5	23.75	26.25
50.25	31	19.75	6.25	22	17.5	46.25	30.5	37.25	22.75	25.25	22
52.75	35	12.75	5.25	18.75	18.75	39	23.75	37.5	13.75	25.75	25
34.75	35	15.25	5.5	23.75	14.5	45.5	17.5	28	19	25.25	20
38.75	31.75	11.75	7.75	19.25	19.5	44.25	19	34.75	16	32	18.5
29.5	32	10.5	6	16.75	16.5	40.25	19	22.5	17.75	14.75	16.5
42.75	28.75	19.75	6.75	23.5	16.5	32	26.5	44.5	23.25	23.25	21
50.5	34.75	14.75	9.5	11	20.25	25.5	33	50	26.75	28.75	17.5
20	30.5	8.75	3	10.75	11.5	23	19	33.25	18.5	18.75	20.75
27.75	23.25	5.75	2.25	12	14.5	29.5	14.5	28.75	10.25	12.5	16.75
48.75	35.5	16.25	5	10.75	20.5	30.75	26.75	39.75	22	17.5	28
24.5	22.75	13.75	3	22.75	22.5	25.5	17.25	24.75	13.25	8.5	10.75
22.5	33	9.75	2.5	18.25	21.5	44.25	17.5	27.5	18.25	16	14.5
46.25	31.25	17	5	20.25	15	26.75	20.25	41.5	21.25	19	18.25
23	26.75	18.25	5.25	24.75	16.75	24.75	17.75	29.5	16	13.75	22.5
21.25	25.75	13.75	4.75	17	11.25	28.5	23.25	41.25	21	17.5	17
44	30.75	12	8	19.25	15.75	44.25	19.25	34	19	25.75	16.5
39	25.75	11.25	6.5	16.5	16.25	43.25	27.25	40.25	17	26.5	14.25
16.5	21.25	12.25	2.25	19.5	12.25	33	21.5	27.5	12	18.75	21
36.75	28.5	8.75	9.5	13.25	17.25	38.25	26.75	39.5	22.25	27	19
34	25.5	11	2.75	16	16	27.5	22.5	42	28.75	19.5	16.25
28	23.75	5.25	4.75	30	14.25	35.5	20.5	25.25	19	19	19.5
18	29	7	5	12.75	13.5	34	28.5	30.5	19	27.5	22
38.5	53	12.75	6.5	24	32.75	58.25	22.25	17.25	17.5	30.5	27.5
54.75	56.25	18.25	12.25	33.75	36.25	62	22.25	22.25	27	34.75	36.5
39.75	38.25	13.5	7.5	28.25	25.25	36.75	23.25	17.5	9.5	28	30.75
23.75	31	9.5	3	17	21.25	28	27.5	42	15.75	23.25	24.25
39.5	42.75	13	6.25	21.75	23.5	41.75	37	49	25.25	21.75	27
38.5	42.75	15.75	5.75	19.5	25	36.25	26	56.75	22	21.75	20.75
29.5	27.5	8.75	3.75	19	16.5	35	15.25	21.25	15.25	13.5	19
27.75	33	8.5	3.5	17.25	17.5	36.75	14.75	17	15.75	7.5	20.75
46.75	42.75	16.25	4.25	24.75	21.25	31.5	26.75	37	16.5	18.5	15.75
29.5	31.75	10.75	3.75	31.75	19.75	34.5	22	31.5	19	17	22
68.25	39.75	18.5	6	26.25	14.75	35	26.75	38.5	20.5	15.25	25.25
55.75	35	20	8.25	18.25	19.75	26.5	27.5	49.5	29.25	15.25	23
36	25	10.5	2.5	16	21.25	44.75	16.25	32.25	12	12	14.5
39.25	33	9.75	4.75	17.75	15.75	24	29.5	31.5	16.5	21	25
24.5	25.25	12	5	16.25	14	30	22	26.25	19	15	18.5
24	36.75	15.75	4.25	23.5	26.25	29.75	22.25	32.5	27.5	17.25	23
41.5	26	10.75	4	10	18	35.25	19	32.25	12.75	25	15.5
31	32.5	15	7.5	17.25	20.75	42.5	27.25	41.5	20.25	31.25	25.5
73.5	44.75	25.5	8.75	23.75	15	40	30	58.75	26	23.5	23.5
27.5	31.25	10	3.5	20.75	11.75	24.25	19.25	22.25	9.25	17.75	15.25
21.5	26.5	8.75	3.25	15.25	9.75	20.75	14.75	31	10.75	15.25	16.75
27.75	27	12.5	2.75	20.25	16.5	33.75	22	27.75	14	12.75	19
24.25	27	8.75	2.25	15.75	15.5	31.5	21.25	27.25	10.75	8.25	23
42	32.75	11.5	4	21.25	17.75	32.75	22.5	34.75	18.25	11.25	24
27.25	24.5	8.75	2.25	8.75	18.75	28	19.75	38.75	19.75	17.25	15.25
28.5	24.5	12.5	4.25	19	14	28	27.5	29.25	12.5	13.75	22.25
31	32.5	16.25	5.25	23.5	14.75	32.5	18.75	30	16	16.75	27.5
17	24.5	8.5	3.5	11	14.25	26.75	23.5	24.5	9.75	14.5	13
45.75	39.5	16.75	6.75	26	16	32	28.5	45.75	19.25	21.75	19.5
31	25.5	11.75	5.5	24	11.5	28.25	20.75	33	18.25	17	27.25
32	19.75	14.25	4	12	14.5	19	20.5	36.5	19.5	20.25	18.25
30	28.5	14	5	15.75	25.5	41.25	20	27.75	20.25	14.5	19.5
32.25	27.75	8	6.25	18	19	36.25	26.25	33.25	20	21.75	22.5
40	39.25	15.25	8	23.5	19.5	46.75	27	36.25	17.5	28.75	23
29.5	31.5	14.75	7.5	25.75	17.25	39	22.25	31.75	17	28.75	26.5
45.5	24.5	10.5	9.25	17	13	44	29.5	36.5	19	28.5	15.5
45.75	34	15.75	6.25	21.5	19.25	24.5	18.5	35.75	19	23	21
36.25	26.5	16.5	6.25	15.75	15.5	37	27.75	38.75	19.25	25.5	19
20	28.5	10.5	3.25	19.75	12.75	29.25	19.75	27.5	16.75	18	19.5
31.75	30	10.75	3.25	15.25	15.25	20.75	24	38.5	13.5	12.5	16
29.75	28.25	10.75	6.25	20	14.25	32	24.5	32.25	19	11.75	15.25
28.25	35.75	12	2	14.75	13.25	18	18.25	20.75	15	20.25	20.5
26.25	34	9.75	4.25	20.25	14	16.75	19	20	18.5	22	22.5
39	39.25	14.25	5	24.5	19.5	22	29	37.5	22.75	19.5	24.5
53.75	48.25	18.75	5.25	25	23.75	36.5	28	37.5	26.75	16.75	25.5
33.5	22.75	14.75	6.25	10.25	17	20.5	24.75	54	17.75	17.75	20.25
27	29.75	10	5.75	16.75	14	26.25	16	23	12.75	13.75	16.75
31	28	12	6.25	27	19.75	40.5	27.5	31.75	21.25	14.5	23
21	24.75	9.5	4.25	18.75	12	31	17.75	31.25	14.5	17.75	23.25
55.75	40.75	15.25	4.75	19.5	13.25	29.75	23	39	14.75	21.25	20.25
31	28	14.25	3.25	25.75	18.25	30.5	26.5	40.25	18	11.75	21.5
31.75	32.25	8	2.75	19.75	15.75	30	19.75	21.5	13	12.75	16
24.75	27.75	10.5	3.5	20.25	22.5	32.25	15.25	29.5	16.5	15.75	18
31.75	19.5	9	5.75	12.5	16	35.25	24.5	36.5	10.75	21	21.5
62.75	38.5	15	6	20.25	15.75	45.25	33	46.75	20.75	22	28.75
36.5	35.25	13	7	27.25	21.75	39.25	27.5	38.25	19.75	23.25	20
34.75	28.75	19	5.5	24.25	14.75	47.25	30.75	35.75	18	31	17.5
30.75	23.75	7.25	6	14	15	38.75	24.75	32.25	16.5	28.25	19
35	34	9.75	10.75	27	17	55	26.25	35.5	24.5	30.5	21
35	32.5	11	8.25	19.75	16	39.5	21.75	39.75	22.75	23.75	20.5
39.25	25.5	10.75	5.75	18.5	15.75	38.25	25.25	32.75	12.5	27.75	22.25
29	30	7.75	8	14.5	12.75	38	30.5	40.5	18.75	28.25	15
28.25	48.5	4.5	6.25	24.5	25.5	68.75	40.25	45.5	26.25	34	20
45.25	42	8.25	9.75	23	32.5	64.25	22.25	30.5	21	36.25	25.75
43.5	60	7.25	13	28.25	31.75	65.25	29.5	31	21.25	29.5	26.75
47	54	8.25	8.75	36.5	37	68.25	32.75	39.5	18.25	32.5	35.75
42.75	53.5	13.25	10.75	34.75	49.75	66.75	32.5	49.75	24.75	33.5	35.75
31.5	41	6.25	6.75	24	32.5	55.5	38	51	24.5	37.25	26.5
41	44	6.5	8	23.75	26.25	58.5	32	42	21	30.75	24
20.75	47.25	5.5	5.75	24	27.75	55.75	34.75	39	28	32	22.75
24.25	44	6.5	6.75	26.25	27.5	54.5	35	39.75	23.75	33.25	26.75
35.75	52.25	7.25	11.25	20.75	29.25	42.75	36.5	35	19.5	30.25	23.5
29.5	41.25	3.25	5.5	23.75	20.5	54.5	19.75	20.5	15	30.25	22.25
33.75	45.5	6.5	6.5	20.75	25.25	55.5	30.25	35.75	19.75	34.75	24
72.75	54.75	16	16	27	34.25	85	30	44.5	24.75	39.5	27.5
74	62.25	19	24.75	28.5	35.75	65.5	40.5	57.75	26.25	36.75	32
68.5	62.25	20.25	22.25	31.75	49.25	66.75	52.25	75.5	35.25	51	27
72.75	65	20	15.5	23	39	61.5	41.75	58	34.25	42.25	28.25
64.25	67	19	16	30.5	39.5	63	37.75	53	32	39.25	28.25
64.5	61.75	17	27.5	33.5	35	76.5	38.5	53.5	31.5	43	30.75
75.5	76.5	20.75	25.5	40.75	44.25	78.5	33.5	35.75	36.5	42	36
86.75	67.75	24.75	23.5	41.75	38.25	71.75	33.75	51.5	29.5	42.75	23.75
59	47	12	14	49	35.75	52.25	30.75	33	14.5	29	38.25
38.5	42	11.25	11.25	23	26	41.75	27	33.25	14	27.5	36.5
56.75	53.5	15.75	10.75	26.5	41.5	29.75	22.25	36.75	14	37.5	33.5
54.25	56.75	11.5	12.75	42	34.25	55.5	34.25	32.5	24	36.75	29.25
44.75	51.5	9	10.75	42	35.75	53.25	29.25	31.25	20	36.5	27
66	66	10.25	15.25	39	39.5	66.75	31.25	36.75	24.75	39.5	33
51.5	64.25	12.25	13	27.75	41.75	54.25	32.25	37	22.25	37.75	29
51.5	43.5	8.25	12	24.75	33.5	48.5	38.25	45	29.75	36.5	27.5
47.25	48.25	10.5	9.25	23.25	26.75	54	34.25	50	27.5	31	28.25
36.5	44.5	8	8.25	14.5	28.5	41.25	23.75	31.5	20	32.25	27.5
35	59.5	9	10.5	27.5	36.25	68.75	28.25	50.25	23.25	34.75	27.5
59	61	21	13	28.5	35.75	75	45	56.5	33	42.75	27.5
72	57	14.5	17.75	31.75	30.25	69	31.75	50	23.75	40.25	35
71.5	62.5	23.5	23.5	28.5	37.5	55.75	34.5	64.25	34.25	47.5	33
69	50.25	12.5	15.75	26	42.75	53	35.25	41.25	20	33.75	29.75
95.25	67.5	29	34	52.5	46.75	95.5	36.75	75.25	33.75	41.75	37.5
95.75	81.25	25.5	22.5	29.25	53.25	82.75	47	66	35	49.75	30.5
82.5	72	21.25	24.5	43	49.5	92.5	57	58.75	33.25	42.5	28.75
60.25	51	15	15.75	18.25	31	63.25	38	53.75	23	37.25	36.75
43.75	59.75	13.25	13	20.5	28.5	48	33	48.25	28.5	37.75	38.25
46.75	52.75	8.75	10.5	45.75	23	56	30.75	20.75	26.5	33	28
32.25	43.25	4.75	6	21.75	21.25	27.25	26.25	19.25	19	21.75	22.25
31.5	37	8.75	7	14.75	30	28.5	22	30.75	21.25	22.5	25.75
56	54	20	6	31.75	25.5	32.75	26.75	53.5	25.5	25.75	24
40.5	49.5	12.5	5	25.5	17.75	33	28	35.75	16.75	20.25	27.75
24.25	31.25	14.25	5	17.75	27	43.75	17.75	32	13.25	16.25	19.25
26.5	45.5	9	3	14.25	15.5	32.75	14.5	15.5	18.25	8	25.75
44	45.25	17.5	8.75	23	23	37.75	25	46.75	21	25.25	26.25
68.75	52	25.25	8.5	20.25	24.25	37.5	39.25	50.75	20.75	23.5	25.75
35	27.5	4.5	4.5	7	16	26.75	13.5	28.25	22.75	16.5	14.5
29	36	5.25	3.5	14.5	18.5	28.25	20.25	18	16.75	14.5	21.75
30.75	29	16.75	6.25	17	19.75	21.75	18.5	25.75	16.25	12.75	30.75
33.75	32	12.5	3.5	18.5	20.75	27.25	26.25	29	15	13.75	19.75
45	39	16	5.5	17	27	43	32.25	53.5	21.25	21	27.75
51.25	34.75	13.75	4.5	10.75	24.75	13.25	18.25	38.25	20.75	10.75	18.25
42	34	13.25	5.25	23.25	17.75	23.5	21.25	30.75	20.75	13.25	19.25
28.5	28	16.25	4.5	30	19.5	33.5	23.25	33.75	19.75	18.5	30.5
23.75	32.75	11.75	5	12.25	17.25	33.25	20.75	36.5	22.5	10.75	21.75
24.75	34.25	11	2.5	26.25	21	31.75	22.25	36.75	12.25	16	20
34	33	7	7.75	12.5	18.75	26.5	23.5	23	11.5	9.75	17.25
44.75	35.5	16	6.25	13	18.5	25	34.25	60	26.25	20	19.5
37.5	39.75	10	5.25	13.5	11.5	22.75	28.25	37.75	22	17	17
29.75	29.5	9.25	4	10.25	19.25	26.5	24.25	33	14.25	16.25	18.25
36.5	28	13	2.75	15	13.5	29.75	21.75	39.5	16.75	18.75	22.75
32	35.5	10.75	4.75	28.25	18.5	41.5	12.25	26.25	21.25	12	19
24	32.75	7.25	3.75	13.75	13.75	41	15.25	22	10.5	13.25	15.5
40	34.5	11.25	4.5	21.75	11.25	24.25	28.5	29	20.5	18.25	21.25
28	25	12.25	4.75	20	14.75	29.5	18	33.25	12.75	20.5	20.5
55.25	33.5	22.5	4.25	12.75	19.25	24.25	29.5	53.25	30.5	18.75	21.5
24.75	43	13.75	4.25	25.75	19.75	47.75	16.75	21.5	14.75	11.5	18.5
21.75	25.5	6.25	2.5	18.75	13.75	23	21.75	21.5	16.25	13.25	17.25
25	34	6.25	3.25	22.75	13.75	26.25	21.25	18.25	16.25	17.75	23.25
16.25	24.25	7.5	4	9.5	17.75	17	19.5	17.25	12.75	15	25.5
69	47.75	20.5	4.5	28.5	18.5	35	33	54	22	22.25	24.5
28.75	30.75	12.5	4.25	14.25	16.5	22.75	24.5	40	14.75	17	19.25
18	26.25	5.25	1.75	13.5	13.5	38	18	22.25	10.75	10.25	19
34	24	19	3.5	10.75	15.5	24.75	20	32.5	20	16.5	19.25
37	32	20	5.25	19.75	17.75	25.5	19.75	46	20.5	17.75	18.75
16.5	27.75	11	2.25	27	19.25	39.25	19.75	20.75	14.75	14	22.5
34.25	33.25	10.75	6.75	29.75	17	50.75	23.75	35	9	20.75	26.75
42.25	33	12.25	6	14.75	20.75	30.75	31.5	36.25	18.75	17.5	18
61	45	18	8.5	24	17.25	33.25	29.5	50	29	18.5	23
16.25	20	7	3.75	16.5	7.75	23.25	18	25.25	14.25	15.25	21.75
22.75	33.5	6.75	4.5	13	18	47	23.5	21.75	12.75	21.75	20.75
31.5	24.75	12.75	3.75	19.75	14.25	39.5	25.25	25.5	11.5	24.25	20.25
23.25	24.75	9.75	3.25	13	7.5	18.25	12	34.25	16.25	13.25	19.25
19	30.25	4.5	2.5	13	7.75	16.25	16	21	14.5	13	14
41.25	31.5	18.25	5.25	18.25	11.25	28.75	25.25	35.5	17.25	14.75	16.5
23	29.5	9.5	3.75	18.5	15.75	25	18	27	10.5	10.75	17.75
33.5	28.25	16.25	4.25	17	17.5	29.5	23	38.5	23	14.75	22.5
57	35	18	6.25	19.75	17.75	30.5	25.25	43.25	22.25	19.25	21.75
21.25	25.25	7.5	2.75	13.25	12.25	32.25	13.5	20	11.75	10.5	14
31	24.25	8.75	3.5	19	13.5	32.25	22.25	36	12.75	18.5	19
22.25	22.75	12.25	2.5	13.5	10.75	21.25	13.25	32.25	16.5	13	19.75
29.75	26	13.75	3.5	21.25	18	41.25	21	35.5	13	13.5	18.75
42.75	27.25	9.75	4	13.75	13.75	33.75	25.75	43	20.75	16.25	18.5
30	22	9.5	4	14.25	10.5	37.5	21.5	25.75	11.25	13.5	16.5
33.5	23.25	8.5	4.5	13	12.25	29.25	19.5	28.25	13.25	13	16.75
19.75	28	7.25	2	17.25	10.25	16.5	12.5	20.25	18.25	10.25	18.25
32	25.5	15	7.25	23.25	14	32.5	19.25	33.5	21.5	18.75	23.5
19.75	18.5	5.75	4	14.75	14.75	35.75	14.75	29	13.75	14.5	18.75
34.75	33.5	12.75	5	20.25	10.25	28.25	22.75	42.5	14	10.25	14
42.5	32.5	16	6.75	17.25	13	21.25	25	54.25	23.75	20.75	19.75
25	22.25	4.5	3	9.75	12.5	26.5	17.75	28.25	11	12.5	15.25
23	22.75	8.25	4.25	16.75	8.25	25	18.25	22	14.5	6.25	22.25
35.75	23.25	15.5	3.25	20.75	15	33.5	17	36	15.25	13.25	20.25
40.25	35.75	13	4.5	19.75	18.5	44.75	20	35.25	16.5	15	17.25
32.25	24.5	8	4.25	16	12.25	35.5	21.25	23.5	15.75	22	21.5
29.25	27	9.75	6	18	17.5	44	19.25	30.25	12.25	27.25	15.5
66	46.5	21.75	12.75	32	16.25	36.5	33	52.75	29.5	31.75	23.75
39	39.25	11.75	5.5	24.75	18.75	38.5	22.5	29.5	13	27.75	23
27.75	26	10	5	24	14.5	27.75	16.5	19	18	20.5	16
18.25	32.25	4	2.75	15.25	6	16.75	14	12.25	6.75	9.75	17.5
41.75	34.5	14.25	4	25	13	23.25	23.25	43.25	14.75	20	13
25.75	24.75	7	1.75	16	7.5	27	13	27.5	13	8.75	12.75
30	33.75	8.5	4.5	21.75	17.25	31.75	24.75	51.25	22.75	17.5	18.5
21.5	28.25	11.5	2.25	20.75	10.25	26	14.25	20.75	12.5	8.5	24.75
29.5	31.25	10.5	4	20.5	15.5	33.75	21.75	30.75	14.5	21	14.5
22.25	23.5	5.75	2	18	11.75	35	14.5	12.5	9.75	10.5	25.75
38.25	28.75	14	6.25	15.5	12.25	28	30.75	43.5	17.25	23.75	16.25
29	30.25	14.5	3.25	17.75	15.5	24.5	21.75	37	16.75	16	22.75
26	26.25	14.5	2	10	9.5	17.5	21.5	25.25	14.25	13	16.5
46	33.75	14.25	4.75	19.75	14.25	28.75	28.75	42.75	17	16.25	16.75
53.5	39.75	13.25	3.25	22.75	16.25	27.5	19.75	31	15.5	10.75	22.25
41	32	13.5	6.5	17	12	34.25	28	46.75	21.75	16.75	17
18	20.75	9.5	3.5	18.25	10.5	25.5	11.25	18	10	11.25	22.25
40.5	25.25	14.75	5.75	23.5	14.75	33	24.5	40.75	12.5	20.75	16.75
23.5	37.5	9	7	21.75	20	46.5	23.5	33	16.5	19.5	22.25
31.5	45.75	11	6.5	18	15.75	34	21	32.75	16.25	27.75	16.5
36	36.25	14.5	6.5	15.75	12.25	23	26.75	35.75	16.5	19.25	16
46.5	28	12.5	5.25	17.25	16.75	42	24.5	33	19.75	21.75	22.5
31.75	33.75	10	4.75	14.75	13.75	34.5	21.75	23.5	12.5	28.25	19.25
33.75	37.25	16.75	4.5	16.75	11.5	39.75	25	31.75	18.75	24.25	18.5
32.75	24	15	8.75	24.25	18	38	28.75	29.75	16.25	30	21.5
29.5	29.75	14.75	3.5	11.5	11.25	23.25	23.25	29.75	16.75	17.5	16.75
21.25	35.75	4	3.75	26.25	18.25	35.5	19.25	8.75	17.75	20.25	28
37.75	40	11.75	4.25	34.75	28.75	45.25	20	17.75	14.75	26.5	33.25
44.25	55	13.75	9.75	36.25	33	59.25	33	19	24.25	27.5	28
42.5	42.25	11.25	5.5	22.5	15.5	24	27.5	34	22.5	24.75	16.5
48.75	37.75	12.75	6.25	24.5	19.5	21	34	60.25	31.5	20.75	26.25
47.25	36.75	15.75	4.25	27	19.75	27.5	26.25	46	26.5	22.25	18.5
47.75	33	13.25	3.5	23	8	33.5	15	28.5	19	13.5	19.5
28.25	26.5	10.25	4.25	15.75	16.75	32	19	30.25	7	18	23.25
23	27.5	10.75	4.25	17	15.25	36	23.75	24	14.75	10.75	20.25
25	37.75	16.5	2	20.25	11	32	15.25	14.75	12.75	11.75	17
41.25	28.75	17.25	6.5	10.75	13	25.25	27.75	42.5	16.25	16.75	20
44	31.5	11.5	4	13.75	15.25	30.75	33.75	34.5	13.25	16.25	20.75
30.5	34.25	7	4.5	29.5	14	40.5	15	25.75	13.5	18.5	22.5
42.5	32	16.75	5.25	27	12	39.25	27.75	33	14.75	28.25	15.75
39.25	39.25	14.5	5.5	21.5	11.25	26	25.25	38	19.5	16.25	15.5
25.25	30.5	8	4.75	13.75	17	27.5	14.25	22.25	13.75	7.25	15.25
24.75	30	10.25	4.5	23	17	28.75	16.25	24.25	9.75	15.75	20.5
53.25	35.25	20.5	4	20	9.5	28.5	27.5	40.5	22.25	23.5	25.25
19	23.75	5.5	2.75	13.25	10.75	31.25	18.25	23.25	15.25	10	21.75
25.25	26	12	3.25	13.25	17.25	21.75	18.75	30	11.5	13.5	20.25
30.75	19	15.25	2.75	15.25	12.75	23.5	20.5	31.75	11.75	13.5	19.75
47	32.25	11.75	6	17	16.25	33.5	34.25	40	13.5	15.5	22.5
22.75	23	15.75	4	16.75	11.25	29	15.25	29	13.5	16	21.25
28.75	32	7	6.25	25.5	13.5	57	24.25	37.75	14.25	29.5	21.25
22.75	20.5	9.25	2.75	13	14	27.5	15	36.75	17.25	18	17.5
51.25	43	12.75	2.25	20.75	10.75	33.25	15.75	39.5	16.25	13.25	20.75
30	15.75	13	2.25	12.5	5.25	25.25	19	32.75	13.25	13	24.75
28.5	27.25	5.5	5.25	15.5	12.5	34	18.5	32.75	17.25	22	17.5
25.5	26.75	7.75	4	18	16.5	48	26.25	35.75	15	29	18.75
36.5	30.25	9	4.75	22.75	12.25	36.5	23.5	25.5	17.25	24.75	24.25
37.75	30.5	12	7	29.5	13.75	41.25	29.5	31	12	27	24
41.75	29.25	12.5	6.5	16.75	21.5	42.5	29.75	49	17.25	26	25.25
70.75	50.25	19.75	9.5	30.25	18	44	30.5	36.5	21.5	30.5	21.75
29	26.75	9.75	3.75	11.25	18.25	34	20.25	40.25	16	18.5	17.75
21.75	28.25	6.75	2.75	18	10.75	32.25	17.5	18.25	13	14.5	19.25
25.75	34	9	3	9.75	11.75	13.75	12.5	9	9.25	12	20
38	32.75	13.5	5.5	16	16.75	22.25	27	42.5	13	18.25	18.75
50.25	38.25	14.25	4.5	31.25	15	28.5	21.75	44.5	15.75	14.5	17
23.75	27.25	7.5	1.75	15	15	28.5	13.25	21	11.25	8.5	18.25
38.25	37.75	15	5	22.5	13.25	38	12.5	22.75	15	10.25	22.75
43.75	29	17.25	5	23.5	15.25	36	27.25	41	10.5	16.5	23.75
23.5	22.5	7.25	3.25	10.5	7.5	21	20.5	34	9.25	14.75	14.5
38.5	29.75	15.5	4.25	18.5	14.5	27	19.75	36	14.25	16.25	20.25
41	25	9.25	4.25	16.25	14.75	23	20	41.25	23.25	18	21.75
30.25	20.25	10.25	4.25	9.5	11.25	21.5	12.5	30	12.75	8.75	19.25
18.25	23	9	2.25	19.75	11.5	34	13.25	24	11.5	13.25	19.25
32.5	35.25	14	5.25	26.75	10.25	35	25.5	35.75	14	12.25	18.25
43.5	38	17.25	5	30	19	33.5	24	35.5	20.75	24.25	21
27.25	26.25	11.25	5.25	17	13.25	42	21.75	22.75	10.5	30.5	17.5
48	26.5	15.25	9.5	27.25	16.75	43.5	28	44.75	24	27.25	24.75
44	39.25	13	7.75	20.25	14.5	36.75	22.5	34.75	12	23.5	14.5
23	21.75	5.5	4.5	22.25	18	51.75	14.75	25.25	13.5	27	19.25
26.75	24.5	13.25	5	29.25	9	35.25	23.75	27.75	12.5	26	24.5
43.75	35.25	16.75	10	24.5	18.75	47.75	27.5	33.25	12.75	33.75	21.25
52.25	38	14	7.25	24.75	13.5	46.25	32	42	15.5	25.75	20.25
23.75	26.75	9.25	4.25	9.75	9	24.75	17.25	30.75	11	13.5	15.25
22.75	27	7.75	2	10	7.75	24.25	10.25	19.25	6	10	16.25
39	31.75	10.25	3.5	10.5	8.75	17	29.5	43.75	18.5	22.5	13.75
36.75	35.5	10.25	3	15.75	11.25	35.25	22	31	8.25	13.75	17.75
32.5	33.5	15.5	2.25	26.75	13	34.25	19.5	22.75	10	10.25	15.75
32	27.25	6	3.25	14.25	8.75	26.25	21.5	36	12.75	18.25	17.5
24.25	27.5	6	2	24.5	13	27.5	20.75	28.25	8	11.75	18
38.5	38	13.5	3.75	16.75	14.75	31.5	17.25	34.75	14.5	13	16.75
36.5	34	10.25	1.75	19.25	13	43.5	16.75	30.25	12.5	15.25	16.5
27.25	20	9.75	2.25	13.5	10.75	35	28	34.5	15	26.25	22.25
41.75	28.5	16	6.5	28	15.5	40.75	30.25	40.75	15	25.5	22.25
26.25	32	11.5	6	25	18.25	51.25	28	23.25	14	25.75	18.25
33.25	30.25	11.5	4.75	21.75	18	42	19.75	31.75	10.75	25.5	18
50.25	32.5	22	7.5	23	12.5	33.5	29.75	47	21.25	19.75	23.75
35	36	11.75	5.5	24.5	12.75	38.5	19.75	24	13.75	23.25	23
53.25	40.25	14.75	5.25	21.75	10	50.25	27	29.75	10.5	28.5	19.5
32.75	25.75	15.75	8	18.75	16.5	37.75	27.5	36.25	14.25	30.25	20.25
26.25	26.5	6.25	3.75	18.25	9.25	39.5	23.5	33.5	15.75	25.25	18.75
39.75	35	13	5.5	26.25	11.75	51.25	25.75	38	16.75	28.5	21.25
27.75	24.25	7.25	5.75	17.75	15.75	49.25	26	29.75	9	32	17
27.75	31	6.75	4.5	24.75	16.5	44.75	21.25	31.75	13	32.75	14.75
49	38.75	13.75	6.25	32	9.25	31.75	37.25	47.75	15	31.75	16.5
49.5	42.25	11	2.5	18.5	9.75	33	20.75	31.5	11.5	21.25	17.5
15.5	26.25	3.5	1.5	9.75	6.25	20	13.25	13	10.75	14.75	18.25
34.5	29.75	12.25	4.75	22	14.25	24.5	14.75	20.25	9.5	13	21.5
35.25	32.25	15.5	3.5	19.75	15.5	25.25	20.5	25.25	13	18	20.75
31	36.75	11.25	2.75	18.25	11	21	26.25	35.75	14.25	13.75	19.25
41.25	34.25	9.25	3	24.5	20	31.25	23.5	47.5	18.25	14.25	23.75
49.25	41	20	5.5	22.25	15	35.25	28.5	47	20	18.5	25
15.75	29	6.25	2.25	12.5	15.75	40.5	12.5	18.5	5.5	7.75	18.5
28.75	27.25	9.5	3.25	17.5	10.75	29.25	23.25	28	11.5	13.75	22.5
41.5	30.25	11.75	5.25	20.5	12	38	23	42.25	14	19.25	21.5
23.25	27.25	13.5	5	20.5	13.25	27.5	17.5	26.5	18.5	12.5	16.75
43.75	29.25	13.5	6	23.25	15.5	27.75	24	32.75	17	14	22
42	34.5	16.5	3.5	23.5	19.75	43.25	23.5	44.5	15.25	20.25	16.75
16	31	8	2.75	23.5	15	25.25	12.25	15.25	6.75	15	21.5
30.25	23	12.5	6.25	27	21.75	54	26.25	33.25	7.5	27.5	17.5
30.75	40.25	15	7	23	15.5	34.75	22.5	28.5	17.25	31	26
42.5	30	14.5	7.5	17.5	12.75	43	23.25	35.25	15.25	21.25	15
22.75	27.25	5	2.25	16	8.25	26	19	24.25	11.75	13.75	15.75
37.25	32.5	15.5	5.75	20	16.75	19.5	21.25	47	23	14.5	17.5
39	30.5	7.5	2	15	13	25.25	14.75	32.5	15	12.75	19.25
29.25	25.25	10.5	3	15.5	5.75	23.5	17.75	28.25	16.25	14.25	20
24	23.75	6	2.25	19.75	12.5	26	16	27.25	18.25	12	25
19.5	20.5	7.5	2.75	18	12.25	30.25	25.25	35.25	15.25	12	19
59.75	40.25	18.25	8.25	22	19.75	35.25	35.75	52.5	17.25	25	19.5
31	30.25	10.25	3	14.75	15.5	31	21	36	15.5	15.5	18.5
29.25	27.25	15.25	3	18.5	11.25	23.5	17	23	14.25	8.75	17
26.25	24.75	16	3	20.5	14.5	25.5	19	27.5	7.75	14.75	14
17.75	21	8.25	1.5	15.75	11	23.25	16.5	16.25	7.75	12	19.75
38.75	41.25	11.75	4.75	33.25	15	41.25	18.5	43	12.5	29	20
23.5	22	10.5	3	13.5	14.25	44.5	22.25	36.5	15.25	22.5	18
31.25	32	8.5	5.25	21.5	18.75	49	18.75	22	14	24	20.5
24.5	35.25	9.25	4.5	27.75	10	35	18	30.25	19	19	16.5
27	34.75	10.25	2.5	20	9.75	24	16	23.5	9.25	14.5	9.25
44	29.75	19	3.5	17.5	12.25	25.25	23.75	41	16	12.5	14.25
30	32.5	14.75	2.75	34.25	11.25	32.25	23	26.75	14.25	14	18.75
26.5	21	10.25	2.75	14.75	9.25	38.75	22.75	26.75	10	14.75	22
17	35	7.5	4	22.25	14	39.5	20	28.5	10.25	14.75	18.25
34.25	33.25	11.75	5	19	14	38.5	28	30.75	13.5	35	25
61.25	33.25	17	4.25	26.75	13	35.5	28.5	45.25	22	29.5	22
29.75	24.25	7.75	4.5	23.5	18.25	52.5	21.75	23	6.25	29	19.75
40.5	36.75	16.25	8.75	29.5	20.25	48.25	29.25	42	15.5	28.75	21.75
29	35.75	6	3.5	17.75	13	41	23.75	30	11.25	26.75	12
22.75	36.25	5	4	18.5	17.5	26.5	18.75	25.5	17.5	29.25	20.75
27.5	23.5	8	5.25	20.75	17.5	45.75	26	39	21	32.5	24.75
44.75	39.5	9	2.75	19	14.75	32.75	28	38.75	16.5	26	16.75
20	34.5	7.5	5.75	17.25	19	38.75	21	27	16.5	29	22.25
20.75	28.5	9.5	3.75	21	13	22	24	36.75	16.75	29.75	25.25
25	39.25	7.75	4	17.75	18.75	43	31.5	16	10.5	29	29.25
42.25	36.5	11	4	27.25	19.5	40.25	27.75	24	12.25	26.5	29.75
47.5	41	15.5	7	25.5	24.25	18	33.75	63	32.75	30	27.5
43.25	40	12	3.5	17.25	16.25	25.75	26	40.5	17.5	22.25	23.25
16.75	26	5.5	2.75	16.5	15.75	34.25	17	26.5	11.75	16	21
21.25	29.75	7.5	2	14.5	14.5	38.5	19.25	20.25	14.75	12	24.25
44	49.5	13.25	4	21.5	15.75	36.25	23.25	37	19.25	16.75	17.5
26.25	34.5	11.25	4.25	26.25	16.25	30.75	14.25	14.5	11.25	8.5	24.25
36	26.25	14.5	2.75	35.25	10.5	26	28	27.5	13	21.75	19.75
36	30.5	12.25	3.5	21.25	18.5	45.5	25	36	12	21.25	24.25
39.75	33	13.75	3.25	11.5	14.5	28.5	31.25	49	20	16.75	19
27.5	26.75	6	2.5	22	9.75	32.25	11.5	22.25	9.75	10	20
15.5	22.75	8.5	2.25	14	13	21.75	18.5	31.5	16.75	18	20
21.75	20.5	8.5	5.5	14.25	8.25	26.75	24.25	37.25	15.25	13.25	17
30.25	33.25	10.5	3.75	22.5	14.75	41.5	20	25.75	11	14	20.75
53.75	40.75	19.25	9.75	24.25	19	44.5	34.25	48.5	20.5	26.25	25.5
50	34.75	14	8.75	22.75	16.75	49.75	22	35.75	10.75	25.5	23.75
27	29.25	7.75	4.25	21	18.5	38.5	19.25	21	9.25	25	25
30.5	23.5	7.5	5	27.25	10.5	45.25	23	31.75	18.75	29.75	23
44.75	46	11.75	7.75	27.25	15.75	38.75	23	32.75	15.25	34.25	25.5
66.25	50	19.25	9.5	21.5	15.5	48.5	30.25	34	14.5	31.25	22
43	29	15	5	15.5	15	40.25	20.25	36	12.5	33.75	16.5
31.75	32.25	7.5	2	16	11.25	32.75	17.25	29	13.5	12.25	15.25
17.75	26	8	2.75	9.5	9	24.5	12.5	26.75	5.25	12	11.25
36	30	12.5	3.5	18.5	12	25	22	41.75	20.25	16.25	18.75
22	28.25	5.5	2.25	16	10.5	24.75	16	19.25	8.75	8.5	21
24	25.25	15.75	3	32.5	11	20.25	18.75	20.25	8	16.25	23.25
19.25	29	11	4.5	19.25	11	30.5	15.75	29.75	13	12.5	16.25
24.75	28	6.75	3.25	18.75	15.25	31.75	24	31.5	16	15	29.25
24.75	31.25	12	4.75	17	20	29.5	14.75	27	11.25	12.25	16
31.25	24.75	10.25	2.5	18	11.25	26.25	17.5	31.75	7.75	19.75	18.75
38.75	28.75	8.25	3	15	9.25	33.75	22.75	37.75	12	16.75	17.25
28.5	24.25	9	4.25	16.75	7.75	21	20.5	31.75	18	21.75	15.5
18.5	22.25	6.5	3.75	17	11.75	39	13.25	22.75	12	14.25	20.25
24.25	26.25	9.5	2.25	18.75	15.25	41.75	16.25	19.5	10.5	15.25	22.75
46.5	30	18	4.5	21.75	18.5	45.25	27	43.5	14.25	30.5	22.5
27.75	18.75	11.5	5.75	24.5	13.25	43.5	22.5	33.5	17.5	24.75	21.25
31	28.75	7.75	8	31.75	15.25	43	26.75	34.25	12	26.75	21.75
38	36	12.5	4.75	22	14.5	39.75	26.5	33.75	17	29.5	19.75
37.5	26.25	13.5	6.5	29.25	13.75	36.5	23	37.5	10	34	17.5
49.75	39	16	5	27.5	11.25	35.75	31	46	20.25	31.5	20.5
42.5	32.25	14.25	1.75	15.5	12	36.25	16	27.25	9.75	14.5	16.75
21.25	29.75	5.5	1.25	20	11.25	33.5	13	16.75	11.25	11	16.5
31.5	20	12.75	4.25	16.25	11.75	33.25	22.75	34	13	19.25	16.25
30.5	36.5	14	3.5	10	10.5	22	18	17.5	9.75	12.75	13
32.5	23.5	10.5	2.25	28.75	8.75	20	24	30.75	13.25	17	15
25.5	32.75	6.5	2	24.25	11.5	29.25	18	13.25	9.5	20.75	23.5
37.25	33.5	11.25	3.5	24.5	12.25	20.5	28	44	21.25	19.5	20.75
40	36.25	12	4.5	18.25	11.25	33	28.5	37.5	8.5	17.5	17.5
39	33	15.5	4	22.25	19.75	30.5	19.25	35	14	13.25	19
26.5	35.5	11.25	3.25	16	15.75	30.5	17	29.75	9.25	12.75	22
38.5	32	10.75	6.25	20.75	14.75	25.75	17.25	32	8.75	19.25	17.25
27.75	25	7.25	2.5	15.75	8.25	20.25	21.75	30.5	13	10	21.5
35.5	32.75	8.5	3.25	11.25	14.25	24.5	23.75	37	17.25	13	19.25
25.25	31.25	9.75	1.75	23.25	12	27.5	17.5	30.5	12.25	10.75	22
26.5	29	9.5	3.25	19.5	10	23.75	15.25	36	14.25	16.25	15
35.5	26.75	11.25	4.25	16.5	10.25	38.5	19.5	32.75	10	15.25	21.25
36.25	37	12.25	4.75	28	17.5	42.25	25.75	39.75	16.75	17	22.75
34.75	24.5	10.75	7.75	24.75	15.5	40	25	26.75	10.5	25	18.75
30.5	31.25	14	3.5	29.25	15.25	36	28.75	31.25	12.5	31.75	18.75
42.75	29.25	9.75	3.25	18	7.25	43.75	30	25.5	15.75	21	20
48	54	18	8.25	39.75	28.25	64.75	23.25	16.75	16	30	30.5
45.5	53.5	14.25	7	58.25	30	63.75	27.25	16.75	15	32.5	34.75
42.75	63.5	15	10	42.75	39	64.5	30.5	21.75	17.75	44.25	33.5
41	51.25	14	8.25	25.75	27	50	27.5	19.75	15.75	35	25.75
31	36.5	4.75	3.75	19.75	14.5	16.75	30.5	24.25	15.25	19.5	29.25
47.75	38.5	11.25	6	27.5	18	28	31.5	39.5	15.5	19.5	21.5
54	44.25	14	6.25	25	19.75	25	30.75	65	20.5	24.75	29.5
64.75	39.75	14.5	6.75	29.25	17	40.5	40.75	54.5	22.5	21.75	18.75
37	28.75	9	3.75	18.5	23.5	41.25	26	30.75	9.75	16	18.75
22.25	37.25	9	3.25	20.25	14.25	30.75	13.5	20.75	8.75	9.75	26.25
24.25	38.25	12.75	3.5	14.25	12.25	29.75	20	26	13.25	12	18.75
16.25	20.75	7.75	2.25	18.25	8	29.75	17.25	20.25	7.75	12.25	18.5
27.5	33	19	6	21.5	16	28	28	33.75	15.75	20.25	22.5
44.25	30.25	11.75	6.75	21.75	14	31.25	35.5	35.25	22.25	26.75	24.5
60.25	50	18.25	8.5	31.25	16.75	37.5	21.25	27.75	14.5	17.25	21.5
33.25	28.5	4.5	2.75	22.5	16.5	45	23.75	14.5	14.25	23.5	33.25
21.75	28.25	7.5	2.5	14	13.75	18.75	16.75	25	12.25	16	20.75
31.75	28.25	14.25	3	16.5	13.25	28.25	18.5	27.25	12.25	20	23.5
26.75	31	10.25	4	19	20	27.5	16.75	19.25	14.5	13.75	26
21.75	21.25	10	2	20	16	28.75	14.75	31.25	6.25	21	25.5
26.75	31	6.75	5.25	24.75	11.5	34	16	23.75	11.5	16.75	20.75
26.5	42.5	13	2.25	19	11	17.5	24.25	26.25	10.75	15.25	24.5
30.5	35	11	5.25	27.75	23.75	49	19.5	28	18	23.75	22
46	31.5	15.5	7	14.25	14.75	37.75	31.75	54.75	18.5	32	17.75
33	34.25	8	2.5	17.5	7.25	31.5	17	20.25	14	13.5	23.75
24	31.5	5.25	2	23.25	16.25	33.75	17.75	14.25	11.75	23.75	25.25
20.25	28.75	5.25	1.25	15.25	11.75	17.75	17.5	14.75	8	14	20.75
26.25	32.25	8.25	1.5	23	9.75	27.5	24.5	29.25	10.25	11.25	19.25
23.5	44.75	11.5	2.75	25.5	21.75	39.75	19.25	29.75	15	14.25	25.25
30.25	38.75	15	3.25	27.25	14.5	22.5	32	26.75	7.5	13.5	19.25
25.75	29	1.75	3.25	22	7.5	19.75	20.5	13	12.5	19	31.25
49	35	16.25	1.75	25.5	14.25	35.75	32.5	50.5	20.25	16.25	20.5
26.75	30.75	14.5	2.5	23	10.25	33.5	17.5	29	12.75	13.75	25.5
29.5	27.25	10.5	3.25	19	20	35.5	21.75	36	8.25	32.25	16.75
44	38	7.25	2.25	21.25	11	32.25	19.25	26.25	13	14.5	19
30	27	4.25	2.75	19	8.75	24.75	19.25	21.25	9.5	17.75	26.5
47.5	37	18.75	4.25	18.25	16.25	28.75	22.25	35.5	14.75	18.75	25.5
15.5	34.5	7	1	17.5	14.75	26.25	10.5	16.25	9.25	8.75	16
31.75	28.75	7.25	3.5	19	11.75	34	26.75	42	14.5	21.25	21
31	28.75	16	3.5	31.25	10	40.75	26	32.5	18.25	16	24.75
31.5	24.75	6.25	3.5	13.75	16.5	32.25	23.5	33	9	25.25	17.25
51.25	35.25	13.5	7.25	29.75	11	41.5	22.5	39	13.75	28.5	22
23	26.25	5.5	2.75	18	13.25	45.25	13.75	21.5	9	29.75	16.25
33	33.75	8	5	19.75	5.5	20.5	25.5	33.5	13.75	16.5	24.5
24	28	6.25	2.25	17.25	7.5	23.5	18.5	14	8	11.75	24.25
26	29.25	5.25	4.25	23.75	11	23	20.75	24.25	8.75	19	23
20.5	30.75	12.25	2	17.25	13.75	27.75	24	35	11	14.25	22
20.75	27.5	7	3.75	19.75	16.25	36.5	15.75	21.75	9	11.75	22
35.5	36.5	13.25	2.75	20.25	16.75	32.75	22.5	37	15.5	16.5	17.5
18.5	29.25	9	1.5	39.75	9	36	24.25	32.25	10	17	23
27.75	30.75	12	4.5	25.75	13	34.5	22.75	21.75	14.5	20	20
32	33	13.5	3.25	15.25	11	24.5	26.25	42.75	11.75	24.75	17
49.75	29.25	18	5	14.75	13.25	29.5	21	45.5	12.75	20.75	16
22.25	35.5	9.5	4	32.25	11.5	39	16.25	26.25	7.5	19.75	20
30	27.5	14	5	26.5	17.5	47.75	22.5	33.5	14.25	30	20.25
32.25	24	11.25	6.25	30	15.25	42.25	33.75	45.75	18.25	30	19.5
39	42.5	11.25	4.75	36	15.5	58.75	16.75	27.75	9	28.75	20
27	30	7.75	6	18	12.5	42	19.5	27.75	12	31	21.25
28.75	39.25	9.5	4.5	26.25	13.5	47	17.25	27.25	8.5	26.5	22.75
48.25	38.25	13.25	5	30	12.75	41.75	33.25	41	14.5	36	17
21.25	30	3	1.5	17.25	6.5	35.75	16	15.75	10.25	11.5	24.75
41	47.25	10.5	4	15	27.25	26.25	27.25	11	23.25	35.75	27.25
53	71.25	21.25	11	24.5	38.75	39.75	32.25	23.5	21	37.5	25.75
54.75	59	23.25	12	35.75	41.5	66.25	28.5	32.75	24.25	37.75	36.75
61	56.25	23	10	41.75	40.25	62.25	33.25	21	18	34.25	28.25
52.75	65	15.25	9.5	39	46.5	72.25	29.75	18	21.25	34.25	27.25
46.5	63.5	20.5	8.75	42.75	44.5	74.5	25.5	23.25	18.75	34.75	32.5
47.75	57.5	15.5	9.75	41.25	41.25	64.25	27.25	26.25	30	37	28.25
41	48.25	6.5	7.25	27.75	25.75	36.5	26	19.75	19.25	27.5	32.5
46.25	51.5	13.25	6.75	25.5	22	29.5	35.25	45	21.75	23.5	30.75
45.25	38.5	18.5	6	26.75	22.25	33.5	22.25	35.25	17.75	20.5	23.25
22.25	33.5	7.5	4.75	23.5	13.5	21	19.75	13.5	15.75	18.75	28.25
29.5	30.5	12.5	4.5	29.75	20.5	25.25	27.5	24.5	20	19	23.5
34	34.25	9	4	18	17.25	13.25	23.75	32.75	17.25	18.75	22.5
56	44.25	18	8.25	31.25	18.75	39.5	32	51.5	21.75	21.25	28
48	31.75	10	6	17.5	27.75	29.25	27.25	44.5	19.25	18.75	26.5
26	32.75	9.75	4	17.5	14	25	21.5	22	13.75	10.5	23.75
30	37	10	1.5	14.75	21.5	32.25	19.25	20.75	9.75	15	20.75
24	24.75	10.25	4.5	21.5	16.25	29.25	16.5	25	20	17	21.75
37	33	14.25	6.5	18.25	16.75	32.25	36.25	50.5	21	20.25	22.5
17.5	38.25	11.5	4	26.75	14.75	29.75	14.75	31.75	12.5	14.5	21.25
30.5	35.5	12	4.5	14.5	18.5	17.25	25.75	24.25	22.5	21.5	26.25
24.5	26.25	11	2.25	15.5	14.5	28	18.5	32	13.25	18.5	23
26	34.5	6.5	4.5	16.5	23	18.5	23.25	26.5	21	18.25	21.25
40.5	40.25	8	8.5	28.5	26.75	38.5	26.75	29	20.5	21.5	30.5
22.5	29.25	6.25	4	20.25	21.75	26.75	21	29.5	11.25	18.75	25
29.5	35.5	15.5	5.5	17.75	22.75	27	23.25	48.25	25.25	17.5	31.75
23	21.75	11	3.25	16	13.75	38	21.5	37.25	11	14.5	21.75
25.75	34.5	12.5	5.75	18.25	18.25	29.5	20	37.75	15	21.75	22
37.25	27	9	4.75	23.5	15	45.25	24.5	27	10.75	24.25	19.25
29.5	29.5	6	5	11.75	23.75	34	22.75	32.5	12.75	24.75	20.25
50	44.25	15	5.25	19	16.25	39.75	32.5	53	19	27	23.75
39.5	37	14	8.5	24.5	17.25	31.5	24.75	26.25	24.5	23.25	25
24	31.25	8.75	3	15.25	16	21.25	15.75	21	8.75	14.5	18.5
29	35	11.5	3.75	24	25	32.25	19.5	24.75	16	12.25	26.25
52.75	36.75	20	6.75	18.75	20.75	32.25	42	49.25	20.5	25.75	22.5
35.5	30	16	6.75	21.75	17.75	30.5	26	36.25	17.75	19.5	23
29.5	23	7.75	6.25	18	15	40.5	20.5	27.5	17	12	24
20.5	29	8.75	5	15.25	19.25	27	21	18	7.5	21.25	19
35.25	30	14.25	8.5	18.25	17.5	43	32.5	35.5	19.25	32.75	24
45.5	29.5	13.25	4	27.5	20.5	36.25	28.5	40.5	17.75	31.5	23.5
29.5	35.5	9	8	12.5	18.75	37.5	27	33.75	10.75	22.75	20.75
25.5	28	8	6.25	17.75	16.25	40.5	18	26.75	10.5	16.25	18.75
50.25	35.25	14.75	3.5	31.75	13.75	32.5	21.25	49.5	13.5	21.5	13.75
34.5	26.75	10.5	3.75	13.75	15	29.25	22	33.5	16.5	15.25	25.75
18	29.5	6	5.75	8.25	18	18	22.75	22	9.75	13.5	21.5
35.5	31	13.75	3	23.5	15.5	26.75	20.5	19.75	21.5	11.5	23.25
34.5	31	15.5	5.75	17.5	16.75	28.75	21.25	23.5	17.75	10.25	26.5
12.75	16.5	7.75	2.75	14.5	13.5	32.75	16.5	26.5	12	12.5	20.25
47.5	25.5	10.5	6.25	15.5	14.5	38.25	23.25	50	14.25	21.25	17.25
26.75	28.75	7.75	4	11.75	23.5	32.5	20.25	30.25	15.25	17.5	18.25
31.25	28.25	9.5	4	18.75	16.25	34.5	18.75	28	11	19.25	24.75
31.75	25.5	6.75	2.75	21.25	13.5	34.25	21.5	21.5	14	20.25	23.75
34.25	27.5	9.25	6.75	15.25	15.25	38.75	29.75	53.25	20	27.25	18.75
25.25	21.75	8.5	4.5	10	19.75	36.5	22.25	27.5	11.25	18	19.5
46.5	33.75	15.5	12	20.75	20.25	47	30.5	44	20.25	29.75	22
35.5	34.25	14.25	10.75	27.25	16.5	53	33.5	40.5	20.75	25.5	24.75
24	25.25	11.75	4.75	19.75	13.25	29.25	17.75	31.5	17.5	17	20.75
44	28	13	4	16.75	13.75	19.75	22.75	40.25	18.5	18.5	16
25.25	23.5	12.75	4	27.25	10.25	34.75	21	13.5	15.75	12	21.75
15.75	23.75	9.5	4.75	16.25	15.75	35	17	25.25	7.5	18.25	18
51	37.25	19	12.25	25	18.5	39.75	34.75	41.75	24.75	29	25
56.75	40	16.5	11	20	17.5	55	33	40.25	22.75	24.5	22.25
29.25	31.75	13.5	10	24	17.75	48.5	21.5	28	21.75	32.25	28.75
43.25	28.75	12.75	10.75	23.25	20.25	43.25	34.5	40.5	13	37.25	18
56.25	46.25	15.75	12.25	29.25	17.25	40.75	48.75	43.25	26.25	32.25	20
18.75	31.75	4.25	3.75	13	19.25	36.25	14.25	25.75	14.75	32	17.5
26.75	31.25	9.5	5.5	18	17.25	44	22.5	26.5	21	28.5	18.75
59.75	55.25	18.75	13	31	33.75	55.5	30.25	32.25	30.5	35.5	27.5
66.75	58.75	13.75	25	38.75	44.75	93.25	40.25	51.5	38.25	58.25	25.75
87	66.75	24.5	19.25	23.25	46.25	84.75	39.25	49.25	37.25	59.25	25.25
88.5	76.75	29.25	22.75	22.5	60.25	89.75	49.75	70.75	34.5	52	32.75
68.5	66	15.5	17.5	30	51.75	84.75	34.5	67.75	27.5	45.25	29.25
56.25	49.75	18.5	16.5	26.75	40	70.75	32.25	50.75	24	37.25	24.25
63	46	14.25	11.75	23.75	29	54	36.25	61.5	26	38	26
70	56.25	22.25	17.75	32.25	54	73.5	34	62	34.5	52	37.5
32.25	38.5	5	5.75	24.5	34.75	49.25	32.75	36	25	20.75	29.5
27.25	36.25	7.5	8	16.5	28.75	45.5	22	29.5	17.75	24.25	33.75
23	26.75	4.5	7.25	19	19.5	43.75	27.75	36.25	17.25	20.25	22.75
36	43	7.5	10.75	12.5	27.75	32.5	21.5	27.5	21.25	28.75	27.25
34.25	41.5	7.25	6.5	15.75	19	36.75	25.5	25.5	14.25	25.5	25.5
26.75	49	4.25	9.5	12.5	13	29.25	21.75	26.25	13	29.75	19.5
40	44.25	7.75	6.75	18	19.5	41.25	31.5	36	21.5	24.5	27.25
30.5	36.75	6.75	5	22.25	20	32.5	20.75	27.25	13.75	25.25	25
37.75	39.5	17.25	5.5	23	23.25	25.25	29.5	49.75	29.75	19.75	23
43	33.5	12	9	21.75	19.75	33.25	22.75	50.25	19	22	19.75
39.75	36.75	15.75	6.75	23.75	22.5	33.5	31	59.5	20	22.25	22
36	28.5	15	6.5	23.75	15.75	31.75	19.25	28.25	13.75	13.25	25.25
30	26.25	15.75	4.25	17.5	22.25	34.75	18.25	27	7	16	18.5
20.75	41.25	8	3.75	18.25	24.5	48.25	20.25	22.75	10.75	16.5	22.75
38.5	38	13.25	6	11.5	14	27.75	23	35.5	25.5	15.25	18.25
38	41.5	11.25	4.75	28	18.75	42	22	16.25	13.25	28	24.75
40.5	37	14.5	4.75	14.75	19	22.5	22	36.5	15	22.75	20
39.5	40.5	12.25	4	28	20	38.75	24.75	38.5	18.75	14.25	18.75
33	32.5	9.75	3.75	13.5	15.25	25.25	21.75	24	16.25	9.75	20.75
27.25	35	13.25	5.75	10.75	23	23.75	22.25	45	16	19	24
45	27.75	17	7.25	17	28	31.5	31.5	60.25	26	25.75	20.25
27	26.25	15	5	16.5	22	40.25	21.75	23.5	11	12.5	23.25
41.5	34.5	11.5	8.5	21.75	22.25	56.75	21.5	30.25	14	26.75	16.5
38.5	37.5	13	8	16	15.75	36.25	18.5	29.5	21	25.75	24.75
36.25	25	14.75	5.5	23.75	16.5	38.25	25.75	40.25	12.75	27.5	20
61	37.75	16.25	8.25	24	14.25	33.75	34.25	45.25	15.75	26.75	23.5
45.5	29.75	20.75	11	19.25	20.5	43	34.75	43	23.25	28	19.5
43.25	40	14.75	10.5	26.25	21.5	50.5	20.5	33.5	17.25	31.5	23.5
38.5	26.75	16	6.5	20	20.5	41.25	22.75	31.75	11.25	21	20
25.75	26.5	4.25	5.75	15.5	21.5	46	26	29.5	12.5	25.25	17.5
43	39.75	20.25	7.5	19.5	13	26.75	32	34.75	27.75	20.25	23
23	29.5	9.5	4.5	18.75	20.75	50	23	24	7.5	28.25	13.5
29.75	23.25	7.75	7	14.5	13	24.5	21.25	22.25	17.75	19	15.25
26.5	41	7.75	3.75	13.25	20	26.25	20.75	24.75	17.75	20.5	21.75
25.75	32.75	8.75	5.25	16.5	14.5	31.25	23.75	30.25	19.5	15.75	23.5
24.25	20	10	3.5	12.75	18.25	34.25	18.25	40	13	13.75	16.25
76.25	40	17	7.75	29.25	21.25	33.75	26	52.25	17.25	22	31
21.5	21.75	10.5	3.5	15.75	20	36.25	21	31.5	21	15	15.5
28	32	16.25	6	23.25	21.5	45.75	19	32.5	12	21.75	26.75
28.75	25.75	18.75	4.75	21.5	17	44.5	25	30	11.5	25	23.5
32.25	28.5	9.75	10.5	11	20.25	35.5	34.75	46	22.25	26.75	16.75
59.5	53.5	24.25	11	31	16.5	47	39.75	50.75	22.5	33.75	21
32.5	40.25	13.5	6	21	21	48	19.75	28.5	14.5	30	22
35.5	27	18.5	7.25	15	22.5	53.25	29	53.25	21	28.5	20.5
42.5	39.75	12.25	9	31.5	15.25	47.75	36.75	37.5	20.25	32	25.25
36.25	30	7	6.75	16.25	20.25	42	24.75	35.25	12.75	37.5	16.5
20	24.25	6	3	17.5	15.5	40.5	21	32.75	15	23	21.75
57	52	20.5	8.25	24.75	18.25	44.25	33.25	38.25	24.5	37	24
47.5	35.25	11.5	12.5	13.25	23.25	36	35	41.25	22.5	28.75	18.25
30.75	43.5	8.5	5.5	20.75	20.5	38	22	23	20.5	30.5	23
37.25	47.75	13.25	6.5	14.75	22	23.25	29	43.25	26.75	26.75	25.75
31.25	47.5	10.25	6.25	32.5	35.5	50	26.25	18.5	19.5	25.5	25.5
33.75	45.25	9.5	3.25	25.75	21	36	23	33.25	20	31	19.25
40.5	35.5	11.25	4.5	25.5	24.5	28.25	24.75	38	18.25	21.5	23.25
53.5	43.5	19.25	5.75	22.75	25.25	44.75	31	37.5	21.75	19.25	29.75
19.25	22.5	9.5	3.5	17.5	21	30.5	15.25	29	17.75	8.5	25.75
41.75	30.25	11.25	5.75	29.25	18.25	28.25	25.25	25.75	18.75	20.75	15.75
41.5	32.25	11	8.5	19.5	27	51.25	19.25	26.75	13.75	11.25	20
32.75	22	14	7.75	11.5	27.25	34.25	23.25	38	20	18.5	17
19.25	23.75	11	4.25	14.5	21.75	26.5	15	23.25	12	11.25	21.5
36.75	32.5	16.25	6	20.75	17.25	33.5	22.5	31.75	17	20.25	19.25
38.75	34.75	17	10.25	16.75	15.25	36.75	28.25	38.25	27.5	26.75	22.5
57.5	34.25	17.25	9	20.5	21.25	61	37.75	48.5	25	28.5	21.75
46.5	40.75	19.25	13.75	21.5	24	46.75	33	39.25	21	27	20.75
30.25	25.5	11	6.25	21.75	17.25	45.5	22.75	34.75	14.25	27.75	19
36	35.5	18.5	7	28.5	18	52	19.75	39	16.5	24.5	21.5
34.25	39	14	9	22.5	22.25	39.75	22.25	29.75	15.5	25.5	20.25
30.75	35	10	9	18.5	21.75	50.75	18.75	33.25	18.75	27.25	18.75
59.25	45	21	10.25	20.25	24	48.75	37	54.25	26.25	29.5	25.75
43.5	37.75	15.5	12.25	17.75	18	44	19	45.25	24.5	22.75	19.5
31.75	30.75	10.75	6	20	14.75	42.5	23	29	13.25	24	23.25
16.75	29.75	10.5	8.75	18.75	18	44	20.25	30	14.25	27.75	21.25
54.25	53.5	16.75	14.75	33.5	32.75	66	23.75	39	26.5	42	31.25
95.75	81.75	31.75	22.25	27	46.75	108.75	48.25	74	56.5	56.75	41.25
86.5	72.75	30	20	26.5	40.75	71	57	79.75	32.5	47.25	44
71.25	65.75	22.25	21	26	44	56	36.5	68.75	30.25	40.25	47.25
86	82	30	27	54	62.75	80.75	47.5	51	29.25	44	45.5
73.5	69.75	17.5	11.75	46.25	60.5	88.75	32.25	35	26	32	28.75
56.25	68.25	18.75	13	44.5	60.5	74	31.75	23.75	31	44	27.5
68.25	73.75	22.5	15.75	45.5	46.5	73.25	29.75	30.5	21.25	35	36
29.75	56	9.75	10	32.75	31.5	37.5	30.25	17.5	18.25	27.25	30.5
26	36.5	6	7	29	25	20.25	26.5	16.25	21.5	20.75	26.5
32.25	40.5	8	6.75	27.5	25.5	24	28.75	25	22.5	17	26
43.5	60.75	13	10.25	38.75	35	53.25	25	18.75	21.25	27	33.75
54.25	76.5	21.25	12	48.5	68	85.75	34	25.25	20.75	36.75	43.5
67.5	75.25	18.75	13	39.5	58.25	61.5	30.25	25.5	27	34	36.75
62.25	60.75	21	13.75	37.5	60	93.75	32.25	28.25	27	32.5	33.25
51.25	62	20.25	16.75	38.25	45.25	66.25	27.25	27.75	22	33.75	32.25
51.5	71.75	21	12.75	46.75	57	81.25	29	31	25	35.5	41
72.25	78.75	22.25	17.5	39	77	89	35.5	29.75	32.75	36.25	29.25
127.5	106.25	52.5	29.75	39.25	80.25	89	40	47	43	39.25	27.5
95.25	84.75	46.25	26.5	39.75	71.25	66.25	60	57.75	37.75	41.25	34
70.5	74.5	25	16	34.75	65	79.75	37.25	28.25	32.5	44	25.5
96.75	95.5	22.5	21	46.75	80	107.5	34	29.75	29.5	38	38.25
111	105.25	30.25	25.75	56	58.75	100.25	35.25	29.75	29.5	33.5	30.25
138.75	109	53.5	37.25	64.5	66.5	106.25	64.25	72.75	37	47	42.5
149.5	116.25	60.5	43.75	51.25	74.5	103.5	67.5	91.5	45.25	54.5	35
118.5	92.25	49	38.5	45.25	68.25	75.25	38.25	66	34.25	39.75	42.75
142.5	106.5	57.25	35	65.5	72	97.5	39.5	94.5	36.5	59.5	38.5
147.25	115.25	71.5	37.75	58	68.5	83.75	52	93.75	53.75	46.5	35
122.25	89.5	58.5	32.5	45.25	61.5	80.5	45.25	92.25	44.75	42	32.75
115	79.75	55	32.5	31.5	67.5	65.25	41.75	83.25	33.5	46.75	38.25
151.25	106	79.5	38	56.25	81.25	102.25	46.75	86	41	47	37.25
121.75	92.5	61.25	31.5	42.25	59.25	68	41	93.75	37.5	41.75	31.25
135.75	93	68	34.5	44.5	64.5	87	44.25	82.25	34.5	44	36.75
161	118.5	60.25	35.5	65.5	59.75	111.75	36	48.75	27.5	44.25	23.75
174.25	115.5	84	47.25	54	71.75	108	62.25	90.75	33.25	45	34.5
137.75	105.5	60.5	35.75	55.25	63.25	99.5	53.75	94.75	28.75	54	37.25
146	113.75	71	44.25	50	67.5	96.75	38.5	66.25	28.25	48.5	33
154.5	109	66.5	40.75	52	69	85.5	54.25	92.25	37	57	31.5
121.5	88.75	56.75	33	39.75	59.25	72.5	35	80	26.75	49	24
157	118.25	66.75	34	65.5	67.5	85.75	32.25	81.25	29.75	50	43.75
144.25	101.75	74.5	43.75	62.25	70	97.75	43.75	103.5	35.75	55.75	42.75
123	89	49.5	29.25	37	60.25	82.25	28.75	57.25	25.5	45	38.75
151.25	107.25	64	34.75	43.5	60.75	80.5	33	44	24	51	46.75
159.5	121.25	78.75	44.5	61.25	70.25	104.75	62.5	99.25	33	57.75	31.25
145.25	108.5	67.25	37.25	33	65.5	79	48.75	84.75	40.5	41.5	31.5
148.25	111	57.25	36	53.5	66.75	75.75	46.75	101	34.5	56.75	36.5
154.5	97.75	81	49.5	55.5	73.75	84.75	57.75	100.25	38.75	44.5	40.75
124	89.25	62.5	35.25	43.5	69	73.5	43.75	105.75	32	45.75	34
96.75	69.5	44.75	27.25	33	48.75	57.5	33.25	45.75	27.5	45.5	36.25
189.5	115.75	101.5	53.5	67.75	77	119	53.5	101.75	35.25	52.25	31
114.25	82.25	61.75	41.75	47.25	61.5	72.25	33	44.5	31	43	33.75
126.75	98.5	52.75	28.5	39.25	58.25	64.75	29.5	51.75	25.75	40.75	29.25
138	103	76.25	40.25	43.5	70.25	95.5	68.25	102.5	38.75	52.25	36.75
138.5	99.5	63.5	39.25	40	62.25	80.5	42.25	66.75	27	52.25	31.75
129.5	99	73.5	42.25	37.5	80.75	88.25	63.5	109.5	46.25	51	23.75
105.75	73.75	49	29	31	52.5	69	33.75	33.75	29.5	51.25	33.25
161	116.75	75.75	49	58.25	76.75	100.25	59	94.25	36	54.75	30.5
149.5	116.75	80.25	39.25	45.5	72.5	83.25	47.75	96.25	40.5	50.25	27.25
133.5	108	67.75	43.5	54.5	68.75	94.75	43	96.75	40.5	46.75	37
95	83.25	49.75	27.75	49.75	50	56.75	33.25	27	32.25	46.25	28.25
88.5	89.25	38.75	18.75	43.75	47.5	43	39	30.5	28.75	41.5	22.25
147.75	110.75	61.5	35.25	56	67	90.25	49.75	80.5	38.5	46.25	37
140.75	109.75	73.5	40.75	59.75	77	93.5	47.75	89	41.25	56	35.5
146.75	111	61.5	37	62.75	72.5	77.25	40.25	65.5	37	48.5	56
156.75	121	73	38.5	61	75.25	112.25	57.25	82.75	35.5	56	32
130.5	103	54.25	36.5	48.75	68	89.5	57	98.75	38.75	49.5	28.25
140.75	104.25	68.75	38.5	58	55.25	84	51.5	70.25	24.5	47	36
124.75	100.75	70.75	39	35.5	73.75	76.25	53.75	90.5	54.5	48.25	34
116	86.75	64	24	35.75	51.75	68.25	32.5	53	36.75	55.25	33.5
137.25	111.25	64	40	49.75	71.25	69.75	52.75	76	35.5	46.25	39.25
137.75	101.75	62	39	43.5	75.25	89.25	63.5	113.75	41.75	51.75	29.5
106.75	92	50.5	28.25	29.5	59.25	56	42.5	71	35	38.25	33.5
169.75	120.25	88	54.5	84	78.5	115	47.75	77.75	30.75	49.5	31.75
146	114.5	72.5	42.25	45.75	81.5	109.25	63	90.75	47.25	43	46.25
137	108	66.75	39.75	59.25	77	85.5	48.5	88.5	36.75	45.5	38
140	102.75	74.25	41.75	45.75	68	99.75	50.5	92.75	41.25	50.75	35.25
132.5	103	59.75	28.75	50.75	59	80.5	38.25	45.25	26.25	47.25	29.25
141.25	100	52.75	27	36.75	56.25	57.75	42.75	70.75	32	44.25	35.75
165.5	115.25	80	42.5	82.5	69	121.5	49.5	88.5	25	52.5	26
171	108.75	76.75	43	58.5	72.25	96.5	46.25	103.5	33.75	53.25	30.75
143.25	113	69.75	38.5	64.5	61.75	76.5	60.75	87.75	35.75	50.75	38
152.25	107.75	71.25	42	48.75	70.25	78.25	60.75	100.5	33.5	56.5	43
148.25	112.75	73.5	40.25	43.25	65.25	76.25	55.5	68.25	24.5	48.25	42.25
150.75	113.25	69	34.75	52.75	74.25	90.5	69.75	82.75	27.25	50	38.25
124	80	63.5	36.5	31	65.75	80.5	47.75	65.75	30	59.75	30.5
160.5	120.5	77.5	37.25	51	74.5	98	50.25	70.75	30	50.5	37.75
156	109.75	74.25	38	40	71.75	88	47	100.75	31.75	47.75	41.25
164	115.25	82.25	47	49	82.25	90	44.5	100	35.75	60.5	33.5
180.25	109.75	85.75	51.25	44.75	85	98	53.5	96.25	26.25	57.25	37.5
128.5	84.25	63.25	36.5	42	68.5	61.25	50.5	75	30.25	49	38.25
148.75	101.25	77	41	41.75	69.5	87	41.75	72.75	27.75	56.25	37
125.75	89.25	58.75	34.75	46.25	66	82.5	45.75	76	28.5	55.5	36.5
160	110.75	74.5	48.75	50	78.25	104	64	89.5	32.5	55.75	39.5
130.75	90	53.25	33.25	39.5	63.25	80.5	37.25	61.25	27	47.5	26.25
151.75	123.75	71	39.5	51.25	64.75	69.75	55	90.25	34.75	59	34.75
168.5	102.5	84.5	42.25	62.5	85.75	87	56.25	92.5	26.5	47	35
151	117.5	70.75	39.75	46.75	71.25	75.75	49.25	90.5	36.75	48.25	41.25
154.5	108.25	78	46.25	51.5	75	94	57.25	105	37	51.75	42
162	120.25	84.5	50.25	51	86	93.5	63.75	106.25	26.75	59	33
132.75	104.25	66.75	34.75	44	66	68.5	41.25	63.25	21.5	49.75	34.5
157.75	112.5	78.5	52.75	58.25	84.5	107.5	64.75	105.5	35	46	30.25
124.25	95	69	36.75	42	67	85.75	45.25	60.25	27.25	55.25	36.25
165.5	116.25	75	39.25	75.5	73.25	82	41	55.75	33.75	43.75	27
178.75	121.75	81	41.25	75.5	77.25	104.75	42.75	71.25	24.5	46.25	46
136	113.25	75.5	44.25	49.75	77.75	80.25	57.75	108	44.25	47.25	43.5
162.25	123	83.25	47.75	77.75	86.75	114	56.75	95.75	33.5	51.5	35.75
118.5	88.5	53.25	25.5	40	77.25	126.75	36.25	26.25	35.5	44.75	30.75
123.5	109.75	60.75	34	73.25	73	108.75	38.5	72.25	34.75	42.75	37.25
122.5	90.25	62.5	31	89.75	68.25	97	30.75	76.25	25.5	45.25	26.75
112	91	55.5	32.5	49.5	66	77	45.25	59	32.5	40.25	29.5
125.5	82.5	67.25	33.5	51.25	69	77.75	42.75	49	30.75	41.5	35.75
108.5	77	60.75	32.75	40	63	82.25	36.25	45.75	24.25	55.5	23.25
107	82.5	65	36.75	45.5	65	86.5	31.5	43.75	29.25	55	30
102.25	83.75	61.25	35.25	45.75	55.75	85	33.25	39	28	52.75	34.75
99	82.75	67	39.5	43.25	70.75	87.25	35	47.25	22.25	45	31
115.5	97	66.75	33	54.5	65.5	107	33.75	48.75	28.75	52.25	31.25
113.75	101.75	59	39.25	44.25	66.5	107.75	36.5	41.75	21.75	49.5	29.25
140.5	107	60.75	35.5	43	81.25	116.75	35	40.5	21.5	43.75	39.5
139.5	106.5	60	34	68.5	75	134.25	42	52.75	35.75	43	28.25
113.5	96.25	49.5	40.5	95.25	58.25	76.5	45.25	97	28.5	50.5	31.75
108.25	89.75	55.5	38.25	68.25	50.25	76.5	36.25	54.75	25.25	46	32.5
98.25	85.5	49.5	26	47	45.75	70.5	42	47.25	25.25	48.75	31.25
102.5	86.75	56.25	27	53.5	50	81.75	33.75	44.25	26.5	56.25	25.75
101.25	98.25	56.25	35.25	60.75	70.75	108.25	36.25	41.25	24.5	47	32.5
99.5	96	52.25	33.75	41	82.25	106	43.25	34.5	26.75	47.25	37.5
113.75	112.5	43	30.5	43	69	130.75	37	36.5	29	49	38.5
89.75	93.25	32	19.75	30	64	94.75	39.75	35.25	29	44.75	32.75
98.5	110.25	33.25	21.25	34.25	70	101	39.25	40	28.5	51.5	38.5
74.25	81.25	30.5	18.25	35.25	64	95.75	41	29.25	32.75	39.5	28.75
66.25	86.25	37	20	52	55.75	94.75	38.5	31	35.25	44.25	31.5
90.75	78.5	34.5	30.25	53.5	55.25	95	46.75	52.25	21.25	51.75	39.75
87	72	35.75	23.75	58	49.5	67.5	40.25	41.25	34.25	63.75	38.5
82.5	72.5	31.25	22.5	50	54.5	80.5	39.5	34.5	34.25	48.25	36.25
88.25	102.25	30	29.5	56	81.5	123.25	37.25	28	45.25	50.75	33.25
77	93.75	33.25	28.5	47.75	92.5	129.25	41.75	38.75	36.5	50	41
80.5	98	29.25	26	45.25	90.75	115.5	35	42.5	32.5	46.5	34
81	104.5	29.25	28.5	47	83.5	132.5	37.5	41.25	41.5	52.5	29
74.5	83.25	25.75	22.5	33.75	73.25	124.75	41.5	37.75	31.75	47.5	28.25
92.75	89.5	31	22.25	62	72.25	138	48.75	42	51.5	39.25	37.75
59.75	84.25	17.25	23.25	35	73.5	121.75	36.75	25	32	49	40
65.25	90	27	23	51.5	79	128.5	38.5	44.25	39.75	47.75	37.25
75	85.75	22.25	22.75	43.75	69	108.75	34.75	35.5	44	54.5	37
74	91.25	24.75	24.25	41.25	72.25	106	34.5	31.5	34	48.5	39.25
75.5	91.75	30	26	37.5	73	118.5	34.25	40.5	31.75	48.25	32
70.5	89.5	34.5	24.25	35.25	78	101.75	39.5	46.25	44.5	48.5	33.75
71.5	94	29.5	24.75	42	87	111.25	41.75	41.25	41.25	49.5	32.5
74	94	37.25	29.25	48.25	76.75	109.25	43.25	53.75	47	49.25	34
72.25	72.5	23	24.25	38.5	71	93.25	41.25	27.25	44.5	48	40.75
77	97.5	28.25	23.5	44.5	79	110.75	37.25	43.75	34.25	54.25	39.5
87	97.75	40	34.75	47.5	84	113	39.25	51	40.25	54.75	37.25
87	111.75	33.75	33	50	85.5	114.5	39	61.25	43.75	57	37
90	93.75	34	27.25	69.5	70.5	133.25	36	45	45.25	54.75	42.5
70.75	88.5	20.25	22.5	43.25	76	124.5	36.25	26	26.5	49	47.25
79	95.5	26.75	29.5	50.75	76.5	123.5	35	40.75	39.75	51	32.5
66	78.75	23.75	18.5	45	64.75	116.25	34.5	27.5	31	42.25	37.5
91	94.75	33.5	32.75	47.5	76.25	108.25	34.25	47	46.25	54.25	36.75
70.5	74	22.25	25.75	52	63.5	122.5	33.75	33.75	35.25	49.75	34
69	86	21.25	18	53.25	64.25	104.25	30.75	31.25	28.5	37.5	39.75
71.5	83.5	19	20.25	44.75	59.25	101.75	31.25	25.25	34	46	33.5
97.25	97.5	35.25	31.75	43.5	76	106.5	37.5	48.5	37.5	48.75	25.5
82.25	75	22.75	22.25	35.75	61.75	85.75	32	37.75	22	43.75	31.25
75.5	90.5	27.25	22	43	71.5	116.5	35.25	30	35.5	41	28.75
85.5	97.75	37	27.25	43.25	80.75	113.75	36	52.25	37	53.75	33.75
81	92.25	31.5	26.75	40	85	118.5	41	40.75	45.25	49.5	29
84	95.5	32.5	32.25	51.5	83.5	122.25	46.75	52	53.5	49.25	30
71.25	96.25	33.25	31.25	46.5	71.75	117.25	35.25	48	44	64	26.5
66	89.5	26	26	44.25	67.75	122.75	38.25	45.5	42.25	47.25	26.75
98	92	44.25	37	70	78.25	117.25	47.25	65	42	45.25	36.5
74.5	89.25	24	23	44.5	82.25	115	29.75	31.5	31	49	31.5
61	86	26	23.5	45	70.25	115.75	39	36.5	40	52.75	28.75
82	106.5	38.5	31	52.5	75.5	122	42.5	61.75	40.5	52.25	35.5
68	85	23	22.25	45	73.25	122	35	30.5	44.5	47	32
90.5	97.25	39	27.75	65.5	70.5	129	41.5	50.25	36.75	44.5	33.75
68	88.5	22.75	26.5	55	68.5	106.25	43	32.25	46	46.25	29.25
99.5	97	37.25	34	60.5	69	117.75	39.25	52.25	36.5	51.25	38
91.5	95	36.5	29.25	45.75	79.75	122.75	29.75	58.25	37.5	56.75	32.25
79.75	89	26	20.75	47.75	80	113.25	33.5	32.75	33.5	50	29.75
56.25	83.75	18	21	31	61.25	84.5	35.75	23	31.5	43.25	32.5
86.25	94	25	22	47.5	63.5	123	37.25	40	47	41	36.75
69.75	87.75	16.5	20	47.5	57.25	109	36.25	21.75	31	47.25	38.5
76.5	79.75	34.75	24.75	37.75	63.5	98.5	35.25	31.5	33	49.5	32.5
95	94	33.75	28.25	44.25	78.5	135.5	33.5	48.25	51.25	40	29.5
77.75	83.75	25	23.75	50	80	120.75	36.75	36	33	47	37
84.25	106.5	34.5	30	53	92.5	141.25	52	52.5	61.25	52	31.5
70.75	101.5	19.75	19.25	40.25	74	109.75	42.5	28.75	30.5	52	37.75
92	88	29.5	30.5	41	81.25	129	42	45	46	40	35.5
84.25	88.25	33	30	51	77	140.75	36.25	44.75	52.25	40	29.5
79.25	99.5	33	25	50	85	119.5	44.25	46	44	55.5	31
94	109.75	34.5	30.75	58.5	89.25	143.25	45.5	53.25	48	56.25	39.5
73.25	95	17.25	20	52.75	64.25	106.25	36.75	22.5	30	46.25	35.75
78.25	94.25	24	23.25	50.75	67.75	105	40.75	36	29	47.75	38.25
97.5	96	35.5	24.75	61.25	75	134.25	35	42.5	38.5	42.25	41
127.75	113	52	35.5	96.25	70.25	113.75	39.5	86.25	34.25	55.25	25.25
142.75	96.25	72.5	41.5	78.25	71.75	102.5	37.25	74	29.25	47	27.25
134	95.75	69	41.75	71.25	62	98.5	52	68.25	35.5	41.75	31
123.5	95.75	72	40	64.5	72.25	88	54	68	37.5	51.5	28.75
133.75	108.75	83	42.5	78.5	101.5	149.5	44.5	64.5	39.5	60	45
123.75	98.5	74.25	42.5	62.75	96.25	142.75	44	50.75	32.5	54	43
93.75	96.5	59.75	40.5	48	70.25	120.5	43.75	51	33.5	57	33.25
121.75	101.25	65.75	30.75	58.75	79.25	127.25	32.25	41.5	36	49.25	39
91	89.25	37	23	41.75	70.75	113.25	40.5	34.25	36	39.75	32.5
80.5	90.75	25	19.75	43.75	67.75	103.5	42	22.25	35	38	34.25
69.75	89	32.25	18	37.25	57	82.5	43	29	31.75	48	34.5
75.25	94	28.25	25	36.25	58.5	112.75	45.75	24	32	46	41.25
57	90	20.75	23.25	30.25	61.25	110	43	24.5	28.5	36.75	36.5
57.25	88.25	21.5	24.5	32.25	60.5	110	45	21.25	32.25	38.5	33.75
78	91.25	24	22.5	37	58.25	115.25	47	26.5	33	42	33.75
81.75	78	28.75	23.25	31	65.5	117	40.5	28.25	31	41.5	35.5
79	83.75	24.25	22.25	38.75	60.5	110.25	47	26.5	36	42.5	30.25
82	90.5	26.25	19	33.75	59.5	86	46.75	25.75	35.25	36.25	30
80	76.75	27.25	27.75	47	54.25	104	49.75	26.5	34.75	35.25	27
59.5	71.75	19.5	28.5	43.5	61	121	38.5	31.75	27.5	38.25	35.75
82	82.25	24.75	19.25	47	60.25	83.25	43.75	29.5	28.5	39.25	35.5
70.5	82	21.75	23.75	53.75	66.25	109.5	44.5	32.75	33.5	40.25	35
78	79.5	24	25	49	63.25	88.75	45.5	29	31.25	36.5	35
72.5	85.75	29	20	64	64.75	124	40.25	33.25	26.25	48.25	41
85.5	92.25	29.5	21	63.5	65.25	120	41	28.75	30	40.25	42.75
76.75	92.5	22.75	27.25	65.5	62.25	120.75	45.25	28.75	27	42	41
76.25	79.25	25.5	31	47	49.5	94.25	41.75	31.75	27	33	36.5
64	73	19.5	30.75	37.25	56.25	67.75	34.25	31.5	33.25	28.5	35.75
58	83.5	18.75	21.5	48.25	64.5	114.25	44	25	30.75	27.5	44.75
59.5	80.75	24	21.5	45	74.5	129.25	42.25	27.5	32.5	43.25	39.75
68.75	80.25	21.75	23.75	67.75	70.25	121.75	43.5	26.5	25	46.5	35
74	77.5	24.75	24.25	55.5	60.5	121	41.75	26.75	29	35.75	39.75
65.5	73.25	27.25	24.25	53.5	57	114.75	43.5	27.75	28.75	37.75	40.75
58.75	69.75	20.25	26.25	53.75	68	120.5	45.5	30.5	38.5	38.5	42.25
71	88.5	27.25	31.25	56.25	74.5	126.5	44.75	28.25	32.75	37.5	45
81.25	81	24.25	30.25	61	65.5	130.5	40.75	26.75	32.75	39.5	45.75
67.75	83.5	25.5	27	54.5	69	112.75	40	27.75	33.25	39	40
76.75	88.75	28.75	23.25	55	66.75	103.25	35	32.25	31.5	34.75	37.25
103.5	98.75	35.75	38.5	50.5	80.75	131.5	38	28.25	41.5	42	38.75
87	80	28.25	27.5	40.25	84	126.75	39	38.75	47.5	40.75	36.25
76.5	87	23.25	22.75	36.75	64.5	105.5	43.5	28.25	39.25	38.5	36
78.5	83.75	23.75	25.25	42.5	74	100.75	42	24.5	33.75	42	37.25
70.5	81.5	22.75	22.75	56.25	75.25	118.75	40.5	31.75	29.25	46.75	49
89.25	91	26	25.25	60.25	57.75	96.25	37	28.5	29	35.75	43.5
77.25	77.75	21.5	24.25	61.75	64	115	37.75	27.75	31.25	40.25	42.25
80.75	90	29.75	30.75	65	64.5	107.25	35.75	29.5	35.5	41.5	45.25
77.25	85.25	20	22.25	47.5	72.5	114	38.25	28.5	30	35.5	34.5
69	66.75	19.5	24.5	40.5	62	76	36.25	24.75	33.5	44.75	36.75
132.25	108.5	75.25	43.25	47.75	91	103.5	56.75	96.25	63.25	48.5	45.75
94	83.75	64	31.5	38.75	86.5	87.75	44	56.25	43.5	42	37.75
109.25	85.75	49.5	33.5	50.75	75.5	106.75	37.75	33.25	42.5	39.5	35.25
85.25	76.25	31	25.75	36.25	67	86.25	38	30.75	33.25	40	33.25
67.5	76.5	27.75	19.25	46	51.25	77.75	36.75	28	35	37.25	32.5
64	66.75	24.5	19.75	36.5	41.75	67.75	35.75	23.75	36.25	32.5	27.75
63.5	76.75	24.25	20.5	43.75	49.25	78.5	38.25	29	33.75	28	35.25
52	67.75	23.5	18.5	42.75	45.75	74.25	34.75	27	26	30.5	39.5
51.25	74.25	20.5	24	42.5	52.75	84.75	35.25	22	24.5	36.25	37.25
77	100	31.25	23.5	64	73.75	129	38	29.5	24.25	37.5	47
82.5	91.25	23.75	23.75	71	81.5	141.25	38.25	25.25	32.25	40	50.5
73	91.25	28.75	20.75	65	65.25	112.75	36.75	29	22	37.5	43.25
75	88	34.25	25	62	67.75	106.25	37.5	30	24.5	35.75	53
58.75	86.75	23.5	23.25	51.75	66.75	94.5	45	25.25	31.75	41.5	39.75
100.5	99.75	33	31.5	46.75	57	118	37.25	31.75	21.75	29	42
72.25	82.75	21.5	26.75	45.25	68	100.25	34.5	33.25	27	31.75	39.5
79.5	91.25	23.5	28	49.25	79.5	82.5	41.75	28.5	23.75	32.75	36.5
91.5	100	37.75	38	52.5	79.25	118.75	39.5	37	20.75	34.75	44.75
64	86.5	23.25	31	51	82	112	46.25	29.5	41	31.5	41.75
91.25	93.75	37.25	31.75	52	83.5	116.25	41.25	33.75	22.75	34	37.5
92.5	100.5	31	33.75	57	84.25	101	40.5	40.5	20.25	29.5	46.75
81.5	91.25	27.5	35	55.25	87	102.75	39.5	26.5	20	24.75	47.25
69	89.5	25.75	32.5	51.75	81.25	107.75	38.5	28.25	25	34.25	45.25
62.25	60.75	21.25	28	39.5	73.5	94.25	36.75	30.25	40.5	37.25	35.25
95	104.25	39	41.5	41.75	81	98.5	45	34.5	43.5	37.25	40.75
77.25	78.75	31.25	28	48.25	85.5	103.5	46.25	33	33.5	35.75	34.25
74.75	90.5	28	26	52.5	73.75	97.25	45.5	25.75	24.75	31.75	44
81.5	102.75	32	33.25	50.25	73.5	112.5	43.5	31.75	25.75	33.75	47
72.5	79.75	19.5	27.5	44.25	75.25	98.75	44	26.75	38	39.25	33.25
81	85.25	26.75	29.5	41.5	72.25	85	46.25	30	34.5	37.25	40
89	84	38.5	36.75	51	80.25	107	44.25	26.5	27.75	36.25	44.75
108.5	107	38.5	38.25	56.25	85	118.25	43.5	37.75	22.5	37.75	48.25
88.5	93.75	31.75	38.25	52.25	79.75	108.5	42.75	30.5	26	32.5	45
82.25	84.5	33.75	33.75	39.75	71.75	98.5	45	27.25	33.75	43	41.75
74	77.75	24	28.5	46	75.5	93.5	37.25	28.25	33.75	39.25	40.5
78.25	82.5	29.5	39.25	45.75	94.5	121.75	42	30.75	44.5	41	40.75
68.5	89.5	28.25	29.5	42	83.25	106.25	45.5	27	42.5	37.75	45.25
81.5	98.25	31.5	31	42.25	87.75	109.75	43.5	31.5	40.25	34.5	40.25
120.5	107.25	47.25	38.5	62.5	88.5	106.5	52.75	42.75	31.5	38.75	40.5
77.75	92.75	18.75	31.75	51.25	78	121.5	42.5	34.25	30.75	40	35.75
117.5	105.75	51.25	45.5	60.25	84.25	131	46.25	47.75	44.75	43.75	43.25
135.5	97.75	63.25	49.25	95.5	84	99.5	41.5	107.75	31	55	36.5
126	97.25	67.75	45.5	69	72.25	97.5	50	72.75	27	33	35.75
121	91.25	59	38.75	70.25	66.5	86.75	44.25	66.5	35.25	44.5	28.75
139.75	99.75	66	42.75	66.5	82.25	82.75	46	88	35.25	46.75	28.25
126.25	90.5	66	45.25	52.5	78.75	89.75	60	69	36.5	47	34.25
120.5	83.75	83.5	43	49.25	78.25	86.5	49	70.25	36.75	52.75	37
128.25	89.5	78.75	49	53.5	86.75	91.5	45.5	57.25	50	48.75	30.25
146.5	105.25	96.75	50.5	55.25	88	106	52	70	63	53	43
115.75	89.5	65.5	45.5	64.5	79.5	88.75	36.25	37.75	37.75	54.5	34.75
112.25	85	62	44	56	73.75	90.5	43.25	45.5	34.75	51.5	38.5
126.25	89	68.5	44.5	63	85.75	107.75	38.5	52.5	48	44	40.75
104	85.5	52.25	31.25	50.75	76.25	113.75	45	31.5	38.5	49.75	38.25
83.25	89.75	30.75	24	40.5	77.5	107.25	43	28.75	39.25	39.75	39.75
94.25	81.5	45.5	35.25	56.75	73	79	52.75	51	37	41.25	42.5
84	91.75	26	25.75	52	86	116.75	39.5	24.75	39	42.75	39.75
73.75	94.5	32.25	29.75	51	75.25	120.25	36.5	26.5	41.5	44	33.25
77	102	27	25	46	68	112.5	39.75	25.75	36.75	40.75	37.5
115.5	95	37.25	36	51.25	76.25	122.5	44.75	37.25	45.75	39.75	39.5
100.25	100.5	29.5	27.75	43.25	75.5	103.5	44.25	29.5	50	47.75	38
107.75	98	24	28.25	59.25	69.25	126.25	48.25	26	32.25	48.5	48.5
81.5	90	23.75	27	47.75	65.25	119.5	38.5	28.5	29.75	42.75	53.5
81	90	36.75	22.5	39.75	62	97.5	40	36	28.25	36.25	43.75
103	97	25.75	29.75	55	61.75	117.75	34.25	30.5	21.75	40	34.5
106	85.75	28.75	32	48.5	71.75	117.75	37.5	35	31.75	45.5	47.75
97	96.75	24.25	26.75	50	65.75	129.5	42.25	37.25	26.75	47.75	40.75
63.25	80.5	18.75	23	41	54	113.75	40.75	29	45.5	33.25	32.25
69.75	94.25	27.5	30.5	44.5	56.5	114.75	42.25	23.5	33.5	48.25	41.25
84.25	97.75	30	26.75	47.25	76.25	90.5	41.25	30.5	39.75	36.25	36.75
73.75	91.5	23.25	28.25	45.75	68.5	94	36.5	31	37.25	36.5	37.5
70.75	82.5	23.75	22.75	39.25	64.25	120.75	39	25.5	39	41.5	33.25
91	91	21.25	30.25	52	74.75	126.25	35	32.75	28.75	40.5	34.5
79.75	89	36	26	47	72	105	37.25	29.25	42.75	36.75	43.5
76.5	104.25	34.25	29.25	51.25	92	107.25	34.5	34.25	41.25	47	46.25
74.75	107	37.25	42.75	46.75	93.5	133.5	44.25	47.75	52	49.5	37.25
89.5	98.25	37.5	37.25	73.5	81	138.75	50.25	50.25	36.75	44.5	39.5
78	95	21.75	25.75	53	71.5	113	40	30	30.75	43.5	32
84.5	93.75	24.75	31.25	46.75	62	128.25	44.25	25.5	31	42.25	37.5
98.25	94.5	25.5	29	52	72.25	129.75	42	35	37.5	42.25	45
97.25	93.25	22	29.75	42.25	70.5	124	38.25	28.5	37.75	46.75	36.5
99.75	104.25	34.5	36.25	64	78	152.5	34.25	37	34	41.5	50
89	106.75	40.25	39.75	55.5	100.5	124.5	35	38.25	51.5	50.5	38
89.75	107.75	47.25	40	58.25	99	127.25	37.25	58	49.5	59.25	28.25
82.5	110	38.75	38	49.25	88.5	119.5	39.25	43.75	53	55.25	36.25
82	106	37.5	34.5	50.5	103	140.5	43.5	50.25	45	54.5	32.25
96	108.5	45	38.75	52.75	92.5	134	45.5	62	52.75	60.5	33.75
91.5	106.5	38.25	40.5	65.5	97.75	127.25	43.75	61	46.5	60.75	31.5
95.75	108.75	39.5	41.5	49.75	86.5	128	39	56	60.75	55	32
90	88.25	39.25	41	54.75	93.25	133.25	43.5	46.75	45	51.75	42
104.5	95.75	41.75	33.25	70.5	85	139.5	40.25	51.75	54	60.75	37.75
76.25	105.5	30.25	35.25	50.5	84	133.75	38.5	38.75	42	56	43
87.25	100.5	33.75	31.25	49	91.75	137	44.75	42.25	45.25	53.5	35.75
94.75	95	38.25	33.25	47.25	88	131.25	37.75	51.25	45	55.5	35.5
97.75	106.75	41.25	38.75	57.5	82.75	127.75	41.5	61	54.25	54.75	37.5
96.75	109.75	48.5	41	52.75	85	103.25	54.75	62.5	68.5	55.25	32.75
73.25	96.25	32	30.75	58.5	77	125.25	37	42.25	44.5	56.5	37.75
86.75	94.75	35	33.25	58.5	70	124.25	42	52.75	49	48.5	37.25
83.25	103.5	30.75	26.75	70	72.5	137.75	33.5	42.25	46	42.75	41
92.5	92	33.25	30.5	56.25	65	129.25	39	48.75	40	49	47
83	88.25	28.25	31.5	65.5	62.5	128.5	31	36	39.75	47.25	50.75
73.25	87	21.25	21.5	43.75	52	98.75	34.75	30.5	33	34.75	33.25
70	95.5	19	24.5	44	66.25	85.5	38	25.5	38.25	37	33
70.25	102.25	38	35.25	61.5	74.25	103	41.25	50.25	37.5	45.25	36.5
82	109	34.5	31.5	60.75	78	110.5	37.25	41	48.25	56.5	38
80.25	86.5	21.75	23.5	52	64.25	97.25	36.25	29	28	41.5	39.25
65.5	85.75	22.5	27.75	53.25	61	110.25	34.75	31.5	29.25	44	33.75
87	94	24.5	29.75	57	68.75	127.75	41.25	37.5	43.5	43.25	33.5
70.75	89.75	22.25	23.75	55.25	67.25	120.75	33	31.5	30.25	44.5	34.75
94.5	96	43.5	46.5	67.75	81.25	125.5	34	64.5	40.75	46.75	42.25
67.5	77.25	26.5	25.5	46.75	77	112	30.5	30.5	25.75	40.75	41.25
75	98	24.5	22.75	65.25	74	91	30.5	37.25	40.5	41.5	41.75
60.75	96.25	25.75	31.5	70	70.5	107.75	38	32.75	35.5	48.25	42.5
76	97	34.75	30	66.5	69.25	102	37	33.75	31.25	45	46.75
85.5	96	39.75	24.5	61	75	75.25	37.75	42.75	31.5	45.25	43.25
101	106.25	56.5	36.75	67	83	110.25	46.75	57	49	41.75	50.25
116	108	58.5	42.25	70.75	75.5	102	41.5	64.75	50.75	36.75	37.5
86.25	87.5	35.75	37.75	69	70.75	93.5	41.25	53	42.5	47.5	38
93	102.75	44.5	32.25	69	71	93.5	24.5	41.5	41.25	44.25	42.75
94	100.25	43.75	26.5	51.25	67.75	103.25	39.5	55.5	30.25	62.5	32.25
112.5	86.5	41.75	31.75	52.5	68.75	85.25	35.75	54	40.25	50	43.5
104.75	87.5	50.5	33.5	49.75	68.75	74.25	40.75	53.25	42.75	51	36.75
86.25	75	33.25	28.75	45.5	54.75	71	33.5	39.75	35	61.75	34.5
86.75	77.25	42.75	28.75	46.75	67	64.5	45	49.5	31.5	60.25	43.25
110	94.75	48	41	48.25	77.75	79.25	46.5	57	50.75	52.25	45.25
109	98.5	47.5	34.25	56.25	69.5	96.75	43.75	63.75	40.5	56.5	45.5
69	82.75	33	19.25	30.75	50	56.75	31.5	46.75	38.75	43.75	37.5
88.75	86.75	44.25	26.5	42.75	62.25	99	35.75	46.75	32.5	48	44.5
89.75	89.25	40.5	31.75	38	56.25	63.75	37	47	34.25	39	34.5
88	84.25	39.75	34.25	38.75	61	91.75	43.75	46.25	41.5	42.25	38
77.5	78	38.25	26	45.5	55.25	68	34	44.75	33.25	39.75	44.75
80.75	93.5	42.25	31.75	48.25	63	89.5	45	48.25	42.75	48.25	47.75
78	80.25	35.75	27.5	35.75	57	68.5	44.5	39.5	37	48	41
86	84.75	31.25	28.25	44.5	65.5	76.5	29.75	36.5	37	45.5	45.25
83.75	84.75	30	26	53.25	67.5	83	39.75	32.75	44.25	42.75	42.5
89.5	79	44.25	29.5	41.5	82.5	100.75	42.75	39.75	50.25	43.75	48
109	106.75	52.5	41	60	70.5	76.25	43.75	69	56.5	37.25	31.25
95.5	105.25	54.75	37.75	50.5	62	71.25	51.5	88.75	47.5	34.25	40
77.5	81.25	46	29.25	37	61.25	73.25	40.25	66.75	44.5	32.5	44.25
77.75	86	46.25	26.75	43.5	64.75	63.25	45.75	62	59.5	33	36
107.5	105.75	52	35	53	68.75	92	50.25	63.5	48.25	43.5	45
115.75	114.5	55.75	39.25	55	66.5	82.5	51.25	67.5	44.5	54	38
86.25	84.5	35	26.25	51.25	62.5	93.75	38	38	31.5	43.5	41.5
90.5	83.25	54.5	32	48.25	67.5	75.25	41.25	53.75	42	40.5	31.75
116	90	47.75	39.25	55.75	62.75	86.5	51.5	71.25	38.25	53	44
109.75	106.5	54	34.5	58.75	75.25	99.25	62	68.25	39.25	61.25	33.25
87.75	81	42.25	32.75	46.25	64	87.5	49	60.25	28.75	57.5	44.5
100.25	88.25	42	29.75	49	63.5	77.5	53.25	79.75	35.5	61.75	45.75
105.75	95	52.25	38.75	59.5	65.75	80.75	41.25	77	49.5	48.25	35.5
60.25	84	35.75	26.25	40.25	57.75	68.75	32.5	74.75	46.5	40.5	38
79.25	79.75	38.5	27.5	42.5	63.75	63.25	32.75	90.75	51.5	38.75	39.25
63.75	79.25	41.25	29.25	49.75	62	65.5	31	74.25	44.75	53.75	47
95	81.5	48.75	33.75	53.5	60.5	77.75	36.25	60.5	43.75	36.5	37.5
71.25	76	38.75	27.25	38.75	48.25	70.5	34.25	24.25	28.5	42.25	31
105.5	92.75	47.5	29.75	58.75	69	99	57.75	68.25	29.75	48	48.75
113.5	97.25	56	28	75	69.25	117.5	40	53	29	54.25	36.75
111.5	101	46.75	38	56.5	71	98	50.25	73	36.5	59.5	35.75
113.5	86.25	55	34.75	71.25	66	94.5	38.25	74	31.75	46.75	43.25
89.75	92.75	45.5	37	60.25	73.75	81.25	47.5	63.5	42.5	51.5	43.5
99	83	40.5	33	56.75	60.25	100.25	48.5	69.75	39.75	54.25	41.75
95	90.5	46.25	36.75	53.25	78.75	82.25	48.75	66.5	35.5	56.5	45.25
108	95.25	49	31.75	63	73.5	96.25	39.75	49.75	45	40.75	40.5
37.5	69.25	18.25	22.5	42.25	34.5	72.25	35	18.5	35.25	41.5	39.25
74	98.5	36.75	27.25	57.25	48.75	83.75	34.5	32	34.75	37.75	39.25
110.75	94.5	54	32	67.75	69.25	94.5	39.5	47.25	43	55	38.75
90.25	86	39.25	32.5	48.25	77	96	47	54.75	44	37.75	48.75
80.5	83.25	36	33.75	46.5	66.75	82	48	41.25	43.5	51.75	52.75
102.25	85.5	41	38.25	52.75	65	76.75	41	56.25	42.25	41	51.5
95.5	95	51.5	29.25	52.5	61.5	101.25	50	42.75	34.5	53.25	49.5
91.75	88.5	33.5	31.5	43.25	67	89.25	39.75	43.25	42	43.5	51.5
84.5	88.5	41.25	33.25	40.75	72.75	84	51.75	37.75	41	50.5	39.5
92	95	35.75	36.25	45.25	65.75	110.75	49	37	35	48.5	41.75
132	116.5	48	42.75	70.75	75.5	95	54	86.75	40	51.75	17.75
110	107.75	42	31.5	46.5	81.25	79	42.75	61.25	36.25	54.75	27.25
91	95.75	33.25	27.25	50.5	77.25	59	42	70.5	31	51	29.25
102	102.75	40.75	29.75	74	65.25	69.75	45	77.5	37.75	48.75	25
91.5	87.75	36.5	28.75	40.5	66.25	87.75	51.25	61.75	32.75	56	27.25
92.75	98.5	36.75	29.25	45	68.5	87.25	54	74.75	31.5	49.5	38.5
108.75	107.5	40.25	31.5	70.5	71.5	77.5	55	72.25	34.75	51.5	25.25
95.5	85	29.75	30	64.5	59	66.75	61	71	34.25	49.25	20.75
104.25	88.5	35	33.5	47.5	61	78	57	69.25	26.25	45	29.5
109	99	39	35	58.75	64.25	88.25	52.25	77.5	33.5	52.5	19.75
100.75	100.5	33.25	30	78	70	83.5	56.5	85.5	39.5	48.75	18.25
139.25	108.75	56.25	42	65.5	82.25	123.25	44	59.25	51.5	58.5	50.25
122.25	102.25	52.5	36.5	55.5	93	111.25	61	93.5	54	54.5	40.5
110.75	98	51	35	47.75	70.5	95.25	47.75	62.75	43.25	53.75	42
72	75.5	28.75	24	56	64.25	82	36.25	25.25	32	48.25	31
101	94.5	49.25	33	58	72.75	93	41.25	57	32	50	38.25
74.5	95.25	26.75	28.5	68.25	61.5	85	41.5	32.75	36.75	48.75	50.25
55	77	20	18.75	42.75	42	71.5	34.75	22.25	24	41.25	35.75
53.5	75	18.5	18.5	61.5	38.75	77.25	35.75	19.75	26.5	30.5	29.25
35.75	49.25	16	10.75	25.25	27.25	53	30.5	21.75	20.5	29.75	30.5
39.25	55	12.75	11.75	33.5	32.75	51	31.25	18.5	25.75	29	32
36	41	11.5	11	23	28.75	44.5	32.5	28	25.25	24	25.75
33.75	55	14.75	9	28	24.75	40.25	33	17.5	21.25	24	29.25
39	47.75	14.75	8.25	24.25	31	50	34.5	25.25	26.75	24.5	30.25
33.75	64	16.25	17.75	31	31	43	42	23.5	18.25	25.5	30.75
30.25	38.5	8.75	8.75	19	32	45.25	35.5	32	23.75	19	32
53	56	17.5	11.5	25.25	24	51.25	41.75	34.5	25.5	23	25.25
103.5	98.25	43.75	31.25	58.75	62.25	106	29	52	34.25	55	36.75
132.75	103.75	44	31	25.75	67.25	73.5	44	87.75	43.5	50.75	29.75
101.25	93.5	43	29.25	34.5	70.25	70.25	34.5	74	23.25	54	33.25
122.75	109.75	46.25	35.75	58	73.25	84	55	86.75	38.5	45.75	25.25
111.25	84.5	43	29.5	54	69.75	96	36.25	62.75	24.5	52	29.75
89.75	79.5	33.75	25	50.25	62.75	76.25	38	61.5	18	49	20.5
98	96.75	37	32.25	53	57	114.25	45	64	17.5	46	25
88.5	84	39.25	34.25	65.5	71.5	101.75	49	80.5	24	52.75	25
107	94.75	40	34.5	55.75	59.25	100	41.75	69.25	22.75	47.75	28
82.5	83	43	36.25	54.5	59.5	89.5	53.75	81.5	25.25	50.75	25.75
99	88.5	43.5	30.75	59.25	69.75	94.75	44.5	76.5	23.25	50.75	19.75
90.5	80.75	30.75	32.5	47.5	63	103.75	41.5	59.5	17.75	50.75	25.75
88.25	98.75	30.25	30.5	63.75	72.25	104.25	32.75	44.75	19	43.25	40
79	91.5	28.75	24.75	54.75	74.5	115.25	40.25	25.75	14.75	44.5	43
86.25	94.75	33.5	30.75	52.75	70.25	97.75	28.5	46.75	25.25	47.5	44.5
114	109	52.5	38	47.75	70.5	109.75	36.75	65	59.25	53	39.25
71.25	79.25	29	26	41.25	76.5	105.75	41.5	25.25	33	42.5	35.25
72.5	88.25	18.5	22.75	57.75	70	110.5	37	22.5	37.25	43.25	33.5
57.75	88.75	22.5	24.25	47.5	65	103.5	35.5	24.5	29.75	41	32.75
81.75	91.5	21.5	27	50.5	66	115.5	33	30.75	36.75	40.25	40.75
87	90	16	23.25	38.25	56.25	96.5	37	23.75	20	38	36.25
97.75	111.75	42.25	37.75	68	86.25	114.25	35	54.25	47	61.25	35.75
90.5	109.5	34.75	33	75.25	74.25	133	37	56.75	43.75	46.75	44.5
127	107.75	59.5	52	73.25	83	111.5	53.75	80.75	46.5	36.75	39.25
97	111.25	54.5	42.5	79.75	88.5	118.75	52.25	82.25	49.5	55.25	40
74.5	96.75	21	21.25	48.75	68.5	107.75	33	25.75	31.25	45.75	44.75
68.5	119.75	35.75	31.75	46.75	102.75	108.25	43	39.25	40.5	49	32
74	109.25	32.75	31	52	92.75	96	42.5	48.75	42.25	47.25	32
91	108	30.75	39	55.75	93.5	115.25	42.25	51.5	54.75	42.5	33
80.5	92.25	38.5	38.75	61.25	86.25	131	46.75	54	44.25	60.5	32.25
83.75	105.75	41	30	58	94	115	46.25	58	54	50.75	42.25
79.25	96.25	35.75	33	47.75	89.25	115.5	37.5	39.5	44.5	49	34
87.25	107.5	47.5	41.75	57.75	101.5	125.25	41	60.75	49.5	53.75	35.5
84	97	32.5	37.25	47.5	97.25	130.75	42.25	48.5	40.25	52.75	39
88.75	100.5	39.5	33	46	91.25	132.5	43.25	53.75	49.5	46.75	34.5
89.75	93	25	33	43.75	89.5	115.75	42.25	53.25	48.5	44.25	32.5
78.5	103.25	28	29	49	83.75	137.25	40.25	38.75	46.25	50.75	36.25
89	102.75	30	30.5	50.75	87.75	119.75	45	44.25	42.25	50	35.25
100.75	101.75	45.5	35.25	57.5	93	117.75	47.75	55	52	49.5	34.5
79.5	99.75	24.75	25.5	56.5	86.5	137	37.75	35.25	36.5	51.5	31.5
150.5	130.25	51.25	37.75	51	85.5	142.75	49.5	56.5	46.75	58.75	37
124	107.75	49	39.25	66	94.5	120	49.75	59.5	47.5	58.75	32.25
85	99.25	23.75	27.5	46.5	76.25	121.75	44	36.75	43.5	49	35.5
86.25	86	30.75	30	49.5	72	145	38	45.5	35.5	49.5	40
94.25	110.25	49	44.5	46.25	92	124.5	44.25	55	44.5	49	35.75
73.25	99.5	33.75	26	44	69.5	89	34.5	57	52.75	42.25	37
73	83.25	27.75	25.75	34.75	69.5	87.5	37	32.25	43.25	49	37.5
61.25	80.25	22.75	22.5	49	70.25	83.5	43.75	31.75	44.25	45.25	35.25
85.75	103.75	38.75	35.25	61.5	71.75	126.75	33	38	38.75	55.25	40
75.25	88.25	27.75	25.25	43.5	71.5	115.75	43.75	32.25	38.5	48	30.25
74.25	95	21	24.25	44.5	62.25	117	41.25	26.75	31	40.75	38
70	87.75	21.75	24	43.25	67.75	114	42.5	26.25	34.25	38.5	35.25
98.25	104.75	39.5	30.5	53.25	86	128.25	40	45.25	36.25	57.5	35
66.5	90.5	20	23	48.5	63.25	79.75	37	27.5	34	41	32.75
81	99.75	24.75	30.5	74.25	81.75	113	41.25	35	33	41	34.25
99	109	28.75	33.25	69.5	70.5	127.25	35.5	53.5	37	47.5	37
104.25	103.5	33	32.5	62.5	72.75	117.75	38.5	54.75	38	51	27.25
74.5	105.25	26.75	24.75	64	72	127.75	41.75	29.75	40.75	41	32.75
77.25	89.5	25	27.25	61.75	61.75	119.75	36.75	33	28.75	37.75	36.25
91	87.5	21.75	22.5	62.75	83.75	114.25	38	33	37.5	37.75	39.5
95.5	106.25	30	32	57.75	75.75	129.25	34.75	38.5	31.5	47.75	43
66.25	91.5	24.5	32.75	55.75	71.5	109.25	37	37	39.75	46	41.75
86	104.5	46	43.25	66	98.75	117.5	44	51.25	48.25	47	36.5
75.75	108.25	33.75	39	57.5	90.5	124	44	54.5	48.75	46.75	30
85	110	36.5	34.25	60	94.5	104	41	49.75	47.5	46.5	37.25
70	97	30.75	30	53.5	83.25	135	39.5	51.75	39.25	51.75	39.5
76.75	108	30.25	33.5	44.25	88.75	142	47	48.75	43.5	49.75	35.25
81.25	107.5	30	32.5	58	80.75	130.75	43	44.5	38.25	44.75	33.5
70.25	89	20.75	24.25	58	72	111.5	42.25	28	33.25	41.5	46.25
91.75	94	37	28.75	64.25	74	102.25	41	41	38.5	43.75	45.25
83.25	106	35	30	88.75	62.5	106	37.5	36.25	39.25	39.75	50
100.5	91	37.25	27.5	89	80.75	127.75	38.5	43.25	36.75	48.25	49.5
101.75	100	40.5	36	75.5	76	122.75	42.5	46.75	47.75	53	50.75
90	97.25	33.5	31.25	64.5	68.75	114.25	39.25	41.25	39.75	43	55.75
75.5	91.75	24.25	27	68.5	56.5	96.75	38.5	32	27.25	40	49.25
50.5	64.5	11.5	20.5	35	38.75	55	29	32.75	38.5	36	30
38.25	51.5	12.25	17.25	26	30	44	39	27.75	40.25	23.5	32.75
86.5	84.5	36.25	25.5	52	51	76.5	44.5	44.75	41.25	43	40
103.5	110	49.25	46.25	55	74	88	61.75	68	45	47.75	37
120.5	110.75	52.25	46.75	47.5	74.25	103.5	51.25	61.75	49.75	44.75	54.5
138.5	95.25	70.5	41.25	35.5	69.5	71.75	41.25	105.25	55.25	50.5	60.5
98.75	91.25	70	38	36	69.5	79.5	44	95	52.25	41.5	32.5
85.75	82.75	62.25	35.25	35.25	55.25	75.25	35	67.25	43.25	40	36
83	85.25	59	26.25	44.25	60	80.5	40.5	51.5	37.75	44.75	36.5
70.5	95	37.75	27	48	54.5	78.75	44.25	57.25	35.75	43.75	41.25
84.75	89.75	40	30.5	51	65.75	88.75	51	55.5	37.5	47.75	49.75
89.75	77.75	51	29.75	47.5	49.5	73.75	39.5	40.5	41	37.75	27.5
92.75	88.25	42.75	32.75	43	55	91.5	49	54.5	31.5	51	35.75
96.5	78	43.25	34.5	43	60.75	74.25	51	63.25	34	53.75	37.5
84.75	84.75	30.25	32.5	36.25	56	72	50.5	65	32.5	54	47.5
89.5	86.75	36.75	29.5	47.5	50.5	76.5	40	52.75	33.25	44.5	35.5
118	93.75	50.5	40.25	45.75	69.75	83.75	49.5	70.5	36.75	58.75	48
123.25	100.25	59.75	51.25	35.5	75.5	73.75	53.25	110.75	55.5	65.25	54.5
102.75	103.5	47.5	35.75	58.25	73	106	49	52.25	33.75	47.75	47.5
114.5	95.5	41.5	38.75	53	64.25	110	47.5	92.75	27	50.75	34.75
94.5	85.5	40	34	44	64.75	87.75	45.5	56	33.25	52.75	39
87.75	96	39.5	35.25	45.5	63.5	84.5	50.5	48	39	49.5	47.25
103.5	82.75	43.25	28.5	55.25	70	93	53.75	48	36	62	36
101.75	90.75	43.25	36.75	58	67.5	104.75	49.5	44.25	34	60.5	46
89.5	80	32.5	32	41.75	72.25	95.75	45.25	38.25	34.75	43.75	47.75
93.75	76.75	34.75	31.5	41	58.5	73.5	46.5	56.75	38.25	46	49.25
104	92.25	50.75	35.5	43.5	73.25	82.25	45.5	38.25	31.25	60.5	45.25
96.75	82.25	45	31.25	47	66.5	76	45.25	36.25	30.5	55.25	38.75
118	110.25	50	44.25	56.5	73.5	97.25	51.5	46.25	38.25	54.75	53.25
95.5	88.5	51.75	31.5	32	58.25	61.75	52	71.5	61.25	39.75	39.5
91.25	94	44.5	30.25	41.25	58.75	67.75	39.75	59.5	45.5	40.75	37.25
103.75	98.5	61.75	36.5	54.75	67.5	87	41.5	49.25	32.75	37.5	36
133	107	61.25	44.5	43.5	75	77.75	66	91	46.75	48.5	33.5
91.5	96.5	46	34	41.75	65.25	74.75	53.25	57	41.5	44.75	32.5
98.5	104.75	37.5	31.5	65.5	60	116.5	36.75	37.75	29.5	48.75	42.5
113.5	98.25	45.75	35.75	62.25	75	111.75	36.75	63	27.75	51	25
96	81.25	33.75	31	36.5	73.25	91.25	30.5	55	33.5	53.5	36.75
78.5	80.25	35	26.25	37.75	59	94.25	37	44	25.5	52.5	42.25
71.25	86.5	28	32	42.75	55.75	68.5	43.75	56.75	26.75	55	41.25
101.75	104.5	52.5	32.75	50.5	64.5	103	43.5	49.25	44.75	44.25	52.25
132	106.75	57.5	40.75	47.25	74.75	111.75	54.5	60.5	25.75	54.5	60.5
111	98.25	46.25	34	50.25	73.75	87.25	49.5	42.5	21.75	54	62.75
107.5	95.25	39.75	30	50.25	69	73.25	56	40.5	29	46.5	55.5
118.5	82.5	45.25	36.75	32	76.5	72.75	56.25	54.25	49.5	43	31.75
103	82.25	34.5	35.5	38	77	63	45.75	44.75	30.25	52.75	36.25
73.25	83	34	30.75	48.5	74	80.5	44	47.75	37.75	46	40.25
74.75	79	34.25	28.5	41	64.75	68.25	41	34.75	38.5	41.75	45.25
66.25	72.75	33.5	32	42	67.75	98.75	47.25	37.5	29.75	47.25	44.25
77.75	86.25	29	25.5	33.75	68.25	76.5	48.75	42.5	37	53.5	46.25
77	80	34	31.75	40.25	64.5	72	53.5	52.75	32	47	42.5
44	76.5	19	19.5	29.75	48	65.5	48.75	31	40.75	37.5	45.75
28.75	55.5	9.75	12.75	24.5	30.25	51.25	44.25	26.75	28.75	30.5	33.5
36.5	53	12.25	15	20.5	31.5	43	39.75	25.75	29.25	24.75	36.75
80.75	92.25	35	38	39	63.25	73	49.75	45.75	33	45.25	40
69.5	77.5	38.5	33	33.75	67.75	87.25	53.25	51.25	33.75	38.5	51.25
79.25	82.5	31.75	25	37	64.25	66.25	51	53.25	36.25	42.75	54.5
63.25	80.25	31.5	26.25	39.75	55.5	62.75	41.25	48	37.5	48.5	34.25
70.75	80.25	33.75	26.75	36	68.5	85.25	47.75	36.75	31	47	50
93.25	92.75	36.5	30.75	36	63	72.75	58.25	46.75	28.75	54.5	49
74	88	39.25	25.25	69.75	74	107.25	45	51.5	34.25	45.25	52.25
95.75	105.25	49.5	35.5	68.75	70.75	112.25	52.75	52.75	36.5	53.5	43.25
107	113.75	55.75	41.5	52.75	70	99	60.25	81.25	51.75	42.5	39.25
59.75	92.25	26	25.25	59.25	68.75	108	37.5	25.25	31	52	33.5
88.25	102.75	25.5	22.25	52	80.75	107	41.75	23.25	27.5	49.25	52.25
61.5	97.5	23	23.25	47.5	70.5	107.5	36.5	28.5	40	41.25	32.25
74	98.5	32	31.75	53.5	69	119.5	41	30.75	36.25	47.25	33.75
70.75	98	21.75	26	45	73.75	108.75	42.5	27.25	43.25	49.5	38.75
87.25	99.5	18.75	23.75	51	71.25	103	44.5	27.5	33	44.25	38.75
73.25	100.5	23	27.75	42.25	75.5	105	37.75	24	34.25	51.5	32.25
77.25	102.25	36.5	31.75	53	75	106.25	38.75	33.75	35.25	37.25	41.75
69.75	90.25	29.5	21.75	43.75	64.5	107.5	39	28.75	43.25	42.25	35.5
77.75	97	26.25	28.75	49.75	66.5	114.5	34.5	31	36.75	47.75	36
103.75	112.5	43.5	34	46.75	78.5	108	39	43	36.25	46.25	45.75
136.75	115.5	57.75	45	49.5	75.25	107	62.75	80.25	48.5	54.75	39.5
76.5	94.5	24	21.5	54	65.75	91.25	41.25	20.75	35.5	41.75	38.5
78.5	79.25	37.5	30.75	43.25	64.25	100	37.75	45	40.5	43.75	36.5
73.5	76.25	38.25	34.75	41.75	64.25	90.5	31.25	46.25	39.75	45.5	34.75
103	103	48	31.5	62.5	72	121.75	41.5	44.75	37	57.25	33.5
88.25	99	34.5	36	46.25	74.75	98	34.25	33.5	38	48.75	40.25
76	93.25	26.5	27.25	56.75	75.5	91.25	45.75	29.75	35.25	42	41.75
55.25	68.5	16.75	20.75	36	41.75	60.75	36.25	32	28.75	30	31.75
40.5	42.25	8.75	12.75	30.25	29	41.75	33.5	29.25	33	19.75	31
48	76.25	21.5	19.75	45.75	50.25	78.75	29.5	24.75	28	35.75	38.75
75.25	108.5	24.75	29	59.25	67.75	114.5	42	27.5	29.5	44.75	43.25
111.25	99.25	64.5	54	43.25	85.75	104.25	68.25	96.5	48.75	54.25	45
70.5	84.75	26.5	25.25	51.25	63.25	92.25	42.5	44.25	33	39.75	43.75
43	50.75	10.25	17.25	36	34	52.5	39.75	23.5	29.25	33.25	30.5
35.25	36.25	15.5	9.5	17.75	29.5	50	26.5	41.75	36.75	21.75	28.75
58	47.25	15	10.25	31.5	27.5	50.75	37.25	42	30.5	23.25	29.75
42	45.5	15.75	13.75	25.5	29.5	52.25	35.5	40	29.5	22.5	23.75
31.5	28	10	8.5	25.75	24	45	22.25	33	18	18.25	30.5
38	44	9.25	7.5	19.75	22.5	53	28.25	26	28	20.5	25.25
28	31	14.75	7.5	19	27	42.25	28.75	40.75	25.5	21.25	23.5
35.25	47.5	16.5	11.5	25.25	29.75	45.5	38	43.25	28.25	23.75	24.25
40.25	33.5	12.5	8	17.75	31.75	45.25	37	53.75	33.25	17.75	24
60	50.5	20.75	11	20.5	21.25	47	36.5	44	23.25	20.5	23.25
32.5	33	12.25	9.5	20.5	25.5	43.25	30.25	34.75	24	18	20.5
36.75	27	13	8	20.25	23.75	38.5	29	31	21	15.5	19.75
30.75	32.25	13	5.75	16.75	24.75	35.5	35	35.25	28.75	17.5	23.75
29.25	24.5	14	8.25	13.25	21.75	35.5	22	39.5	18.75	11.75	24.5
29	49.5	15	11.75	33.5	34.75	53.75	28.75	23.5	24.5	23.5	29.5
27	44	6.5	13.25	18.5	20	30.25	27	29.75	31.5	17	27.25
64.5	48	17	11.25	34.25	23.75	31.5	42.5	63	27.5	20.25	26.75
25	38.75	14.5	9.75	22.25	28	37.5	30.25	47.5	30	16.25	26.75
20	31.5	11.75	4.75	20.75	27.5	36.25	23.5	30	22.5	19.5	19.75
35.75	27	19.25	10.5	20.75	21.5	34.5	31.25	40	25.5	21.75	25.5
32	30.75	26.75	6.5	20	21.25	42.25	25.5	33	20	16.5	24.75
39.25	39.25	18.25	8.5	18	24.75	31.75	37.5	49.75	36	23.5	26.25
26.5	33	9	8.25	18.25	22.25	30.75	25.25	38	27.25	14.75	26
21	29.75	8.5	6.5	16.25	13	30.25	29.5	36.25	18	11.75	20
53.25	40.75	21.25	12.25	28.5	29.25	49.25	34.75	51.75	34.5	22.75	20.5
28.25	27.75	11.25	6.5	16.25	23	38.5	22	37.25	22.25	18	25.75
37.5	31.75	13.25	5	14	23	42.25	39.25	35	28.75	19.25	31.75
31	39.5	17.25	8.25	19.25	17.75	35.75	24	25.25	30	13.5	24.25
33	32.5	13.25	5.75	21	21.75	37.25	25.25	36.25	17.25	20.25	23
39.25	38.75	14.75	10	15	18	38.25	32.75	52.25	24.5	24.25	20
44.25	31.75	14	7.25	21.5	23.75	32.75	22.75	48	23	18	23.5
30	33.25	8.5	4.5	24.75	13.5	28.25	18.75	29.25	18	11	24.75
22.25	27.75	13.25	4.75	14	16.75	27.5	17.75	24.25	21.25	14	22.25
26	26.75	14.5	3.75	28.25	24.5	39.25	24.25	51.25	18	16.5	19.75
28.25	32.5	18.75	9	15.75	25.25	46.75	29.5	41.25	26.75	14.25	22.5
38.5	26.5	18.5	7.25	27	16.25	28.5	26	53	20.25	17.25	17.5
50.75	34.75	15.75	7	26	20.75	35.25	27	55.25	30.25	21	22
29	30.25	12.5	2.5	12.75	18	28.75	21	28.25	20.5	14.25	17.5
23.5	25.5	17.75	5.75	35.25	18	36.5	24.5	29.25	24	15.75	26.25
37.75	25.5	13.25	3.25	16	16.5	32.25	33	40.75	18.5	13.75	21.75
32.5	27.25	13.25	5.5	14.5	19	33	34.5	32	19.75	17.75	19.5
29	24	12.25	4.75	18.25	22	39.75	23.5	43.25	18	26.25	19.5
32.75	29.25	12.75	5.75	19.75	19.25	35.75	25.75	47.75	22.75	16.5	20.25
48	39.75	16.25	6	18.25	24.25	36.25	32.75	49	26.75	24.25	16.75
47.25	30.25	15.5	9	17.25	20.75	32.5	26	37.25	23	16	20.5
30.75	32	8.75	6.5	24.75	28.5	48	26.75	37.25	17.25	15.25	17.75
33.25	24.75	12.5	7.75	13.75	17.75	39.75	27.25	41.75	24.25	20.25	28
24.75	27.5	8.75	5.75	19.75	13.5	35	21.25	21.75	16	10.25	23.75
26.75	25.75	9.5	4.25	13	18.75	22.5	19	36	17.25	14.25	22.25
54.5	34.5	19.75	7	21.75	22.25	28	34.5	55.5	27	25.25	24
25	20.75	10.75	7	8.5	13.75	29.25	15.5	27.5	15	7	18.5
41.75	23.75	14.25	8.75	23	22.5	34.25	29	45	18.5	15.5	25.75
23.75	28.5	12.25	6.25	21	18.75	46.25	14.25	26.75	14.75	15.25	19
28.25	28.25	9.5	3.25	12	12.5	23.75	26.5	43.5	15.5	14	17
39.5	34.75	16.5	8.5	21.75	25.75	39.5	25.25	44.25	35.5	13.75	20
28.5	23.75	19	4.25	18	13.25	33.5	22	23.25	16	13	18.75
31.5	24	11.75	3	17.75	17.5	38.5	20.5	37.75	22.5	10.5	20.5
58.5	36	20	6	24	19.25	30.75	36.75	46.5	26.25	25.25	25.5
32.25	24.25	14	6	12.5	21.5	38.75	26.25	32.75	15.5	13.25	20
32.25	33.25	15	8.5	18	15	30.25	32	33.5	18.25	17.75	26.25
41.75	35	13.25	5	21.5	17.75	26.75	29.25	37.25	24.75	22.75	21.5
43	29.25	16.5	7.75	18.25	19	25.5	31	55.5	23.75	22.25	21.5
38.25	24.75	19.5	3.5	18.5	14.75	37	16.25	33	15.25	16	18.75
32.5	43	16.5	5.25	28.25	25.5	42.75	16.75	27.25	19.75	11.75	19
24.75	23.25	13.5	6.5	11.75	14.75	30.75	22.75	40	22.5	17.5	18.25
34.25	27.25	11.25	7	15.25	16.75	36.75	28.25	36	20	22.75	24
37.5	27.25	19.5	2.75	27.25	17	40	32.5	49.5	20.5	19.25	22
52	39.75	12	10.25	21	19	47.75	32.25	42	19	19.75	24.5
37.5	25	11.75	7.25	21	14.25	31.75	23.75	43.5	21.75	17.75	20.75
33.75	37.5	10	6.25	23	13	34.75	17.5	19.5	14	19.25	27
20.5	24.5	6.75	2.5	12	14	28.5	20.75	31.5	17	11	21.75
33.75	32.5	13.25	5.75	12.5	21.25	31.75	24.75	36.5	19.75	13.75	19
30.5	33.25	13	5.25	17.5	18	39.5	20.5	40.5	24.75	13.75	25.75
35	28	10	4.25	21.5	17.25	32	27	39	20.5	8.75	21.5
48.5	29	16.5	9	18.25	25.5	40.25	32	53.75	25	21.5	19.75
30.5	36.5	10.5	5	23	12	44	19	31	20	13.25	23.75
36.25	30.25	6.75	5.75	18	14.5	26.25	25.75	39	24.75	19	21
44	30.75	22.5	6	27.5	13.5	22.5	27.5	48.75	24	13	21.75
29.5	18	10	2.25	13.5	18	28.25	19	26.5	11	13.5	14.25
24.5	23.75	15	5	18	17.75	29.75	24.25	40	17	18	23
44.75	36	16.25	10.25	19.75	18.25	37.75	20.5	25.75	23.75	12.25	23.5
40.25	24.5	15.25	7.75	17	19.5	32.5	26.25	40.5	24.75	17.75	16.5
33.75	28.75	10.5	5.5	19.25	16	29	22.5	51.25	23.5	13	16.75
43.5	39	14.5	7.5	19	20.25	41.25	20.5	30.25	18	16.5	17.75
51.75	34.75	20.25	8.25	25.75	19.25	44	34.5	42.25	23	23.25	23.5
38.5	40.5	17	9.75	24	24.25	43	18	32.25	26.75	22.5	20.75
45	31	17.5	6	12	17.5	27.25	22	46	20.25	16.75	17
55.75	34	19.25	7.5	21	16	44.75	24.75	43.75	25.5	14.75	21.25
32.75	28.75	12.5	3	17.5	17.75	41	17	36.25	12	15.5	24
28	22.5	12.5	5.75	20.75	16	41	26.25	32.25	16.25	19.5	24
62.75	38	15.75	6.5	27.75	20.25	45.75	20	41.75	25	23	22.5
52.75	31.75	17.75	10	23	17.5	40.75	31.25	50.5	27.5	23.25	21.5
44.25	29.5	17	7	20	15.5	42.5	28.75	49.5	27.5	26.75	22
32	30	12	4.75	19.25	24.75	50.25	21	28.75	14	27.5	21.5
49.25	41.25	16.75	11.5	25.25	23	53.5	29.25	41.75	22.5	26	18.75
50.25	39	20.5	9	22.75	15.75	55.25	24.75	40	18.5	28.25	26
29	27.75	11.25	6.5	14.25	16.5	40.5	13	19.25	14.75	16.25	13.5
43	36.5	18	10.75	19	21.25	38.75	39.75	45	26	32.25	22.25
43.25	35.25	21.5	11	28	24.25	43.5	29	51.5	30	24.75	19.75
70.5	47.5	21.25	13.25	27	19.5	47	34	48.5	21.5	29.5	14.75
30.25	28	8.75	4.75	18.5	21.5	44.5	17.25	30.75	19.25	27	20.5
26.75	31.25	11.75	6.5	17.5	16.75	29.75	19.75	31.75	11	13	13
32.75	30.25	9	4	20.25	13.75	37.5	30.75	44.25	20.25	16	16.5
35.5	25	7.75	6	9.75	13.75	24.5	25.75	32.75	18	16.5	15.25
41	35	10.75	3	24.25	13.5	28.75	24	41.25	18	10	21.25
46	33.25	18.75	7.25	19.25	27.5	43.75	24	46.75	29.25	17.75	19.5
27.5	24.25	15	4	22.5	20.5	33.25	22.75	25.75	16.5	13	23.75
46.25	26.75	20	5	17.5	15.5	31.25	21	36	17.25	20.5	18
46	38.75	17	6.5	20.75	17	34	29.5	48.25	18	17	15.5
31.75	43	12	6	29	20.75	47	31.25	21.75	20.5	19.25	26.75
43.25	65.5	11.25	8.25	26.25	42.75	66.5	33.5	20.25	31.25	27.75	29.75
45	59	12.75	12	24.25	42.75	64.25	41.25	25.75	28.75	35.75	36.25
64	64.25	17.25	17	41.5	45.25	84.75	38.75	31	19	30.5	40.75
45.75	60.75	8.75	5.5	24.5	22.75	45.25	27.75	19.25	13.5	27.5	33.5
41.5	52.5	9.25	12	26.5	26.25	38	33	44.5	26	26	36
49.5	48.5	17.75	7.25	30.75	18.25	42.5	32	42.5	26.25	21.5	18
44	39	15.25	5.75	19.75	21.75	28.5	35.5	47.75	23.5	20.75	23.25
33.25	24.25	17.25	5.25	27	20.75	34.75	21.5	33	15.5	13.5	27.75
35.5	32	10.25	4.5	15.5	16.5	41	23	28.5	15	15.25	23.25
47	34.25	17	7.5	20	16.5	38	28.5	56.75	32.5	17.75	21
49.25	32.25	17.25	8	21.75	20.75	37.75	29.25	43	18.25	13.25	23
60.25	48.5	16.25	8.75	34.25	15.25	37.25	34.75	52	20.5	20	17.5
32.75	26.75	7.75	5.75	13	21.25	40.5	22.25	33.5	16.25	15	18.25
31	42.25	15.75	5.25	23.75	30	48.25	25	27.75	21	12.25	23.25
33.5	29.25	15.5	3.75	22	19.5	32.25	31.25	28.25	22.5	15.75	22.75
38.5	32.5	16.25	8.75	18.25	20.25	35	27.75	51.25	24.5	18.25	23.5
40.75	40.25	13.25	3.5	20.75	12.25	34.75	27.25	30.25	20.75	10	14.75
43.25	38.75	16.25	4.5	23	22	32.25	31.75	45.75	24.75	17	20.25
26.75	24.5	9.75	3	13	15.25	41.5	15.25	26	19	12.5	19
36.5	29.25	13	6.5	20.5	17.25	39	27.75	37.5	22.25	20	22.25
33	34.25	11.25	5	18	13.25	33.5	20.75	26	17	14.25	15.5
41.25	36.75	15	4.25	17.5	25.25	30.5	29.5	44	20.25	20	21.5
51.25	34.75	14	5	28.5	14.25	43.5	21.5	43.5	27.75	15.5	21
38.75	33	10.75	3.75	16.25	12.5	28.75	26.5	28.75	19	16.25	18.5
23.5	22.75	6.25	5.75	12	15.25	31.5	22.25	19.5	13	12.5	17
29.25	28	16.25	5.25	25	17.25	35.75	27.75	35.75	23.5	17	27.25
37.5	30.5	16.25	4.75	21.75	19	37.5	40.75	65.75	26	22	28.5
25.5	27.75	13.25	4.75	19.75	12.75	29.75	16.75	29.75	20.75	10.75	20.75
42	34.25	12	5.5	15.75	16.5	23.25	29.75	38.75	15.25	17.25	17.25
36	32	12.5	6.25	15.25	16.75	32.75	21.5	32	21	19.5	24.25
35.75	29	11.5	5	18.25	12.5	27	25.25	46.25	18.25	15	18.25
20.25	20.5	9.5	5	10.25	9.5	23	19.75	25.5	20.5	14.5	15.25
23.25	23.25	10.75	4	15.5	19.25	32	21.5	23.5	16	15.75	24.5
25.75	29.5	11.5	5	19.5	20	38.25	21.75	29.5	20.5	12.25	18
36.75	35	16.25	6.25	20.5	29.5	48.75	33.5	49.75	21.75	23.5	18
42.5	30.25	13	3.5	31.75	13.25	34.75	27	40.75	13.5	11.75	23.25
53.75	34.25	15	6.25	20.75	12.5	33.75	32.75	47.75	25	22.25	22.25
40.75	35	15	6.75	17.75	15.75	34.75	21	30.75	19	11.75	22
48	29.25	18	9.75	22.25	21.75	38	32.25	39.5	20.5	14	19.75
38.5	33.5	13.75	4	13.75	17	33.75	24	37.5	8.5	15.75	22.75
21	22	9.25	4	14.75	20.25	38.5	19.5	33.5	18.75	20.5	22.75
33.75	22.25	12	5.25	14.25	19	39.75	28.75	41.5	20.5	24.5	20
67.25	40.75	21.75	7.25	31.75	18	39.25	38.25	47	20.5	21.25	26.5
31.75	30.25	10	7.75	21	18	42.25	17.5	27.5	15.5	18.75	19
27.25	29.75	8.75	3.5	12	16.75	39	24	34	18.5	15.25	17.5
40	32	11	7	20.25	17.5	36	26.5	32.75	18.5	18	18.25
45.75	52.75	11	9	21	43.25	74.5	34.75	21.25	18	30.5	36.5
44.75	50.25	12.5	9.75	25	25.5	38.75	32.75	21.25	13.25	27.5	27.5
30.75	37.25	7.25	4.25	18.5	22	30.25	28.5	24.5	17.75	17.25	22.75
35.75	30	11.5	5.75	24.25	18.75	32.75	27.5	44.75	28.25	17	19
34	37.25	13.25	6.75	26.5	25.25	41	15.5	32.75	22.75	13.5	22.75
34	24.75	15.5	6	15.5	25.25	42.75	32	51	19.25	20.25	22.75
53.75	39.5	13.5	8.75	24.5	20.25	25.75	27	43.5	23.25	15	18.25
60.25	37.5	18.75	4.75	20.75	18.75	25.5	42.5	49.5	29	18.25	21
41	36.25	16	5.75	17	21.25	35.25	24	34.75	15.5	10.5	21.75
30.75	21.5	10.5	5.5	21.25	22	29.75	28.5	37.75	18.25	12.75	15.5
37	31.25	9.5	4.5	14.25	16.5	37	27.75	35	26	16	14.25
26.25	23.25	10.5	6	13.75	17.25	34.25	20.75	21.25	18	12.75	17.5
33.5	28.25	14	6	20.75	26.5	42.75	22.5	36	24.5	11.75	26
36.5	21.75	10.5	5.5	13.25	15.25	31.5	24.5	37.5	13.5	19	17.75
36.25	32.75	15	5.75	23.25	13.25	39.75	19	20.75	20.25	11.75	23
24.25	30.25	14	5.25	19.5	20.25	44.75	19.75	30	17.5	16.75	16.25
40.5	34.5	18.25	6	19.25	18	36.5	29	45.75	14.5	31.75	19.5
75.25	41	20.75	11.25	22.75	17	52.75	28.5	43.25	17.75	28.25	23.25
43	36.5	13	8.75	17.25	18	45.25	31.25	50.75	22.25	26.25	25.75
28.5	32.75	11	6	21.25	21.25	38.5	15	30.25	17.75	24.5	18
36.5	26.25	11.5	5	14.5	14	38	18.25	44.25	14.75	21.25	19.5
37.75	31	10.5	4.5	30	14.75	37.25	19.25	29.75	16.25	15.75	24
32	26.5	11.25	5.75	12	16.25	28	27.25	35	17.75	15.25	14.75
34.75	25.5	12	2.75	10.75	15.5	31.5	21.25	35.25	17	15	22
29	23.5	13.75	2.5	17	11.5	26.75	20.75	34.25	19.25	15.75	23.25
41.75	27.5	16.25	5.75	23.5	14	32.75	29.25	30.25	23.75	16.75	15.25
35	31	10	5.75	16.25	18.75	38.25	29.75	39.5	18.25	17.25	21.25
30	29	11.25	6.75	18.75	17	37.75	24.75	35.75	17.5	22.75	20.75
42.75	32.5	14.25	10.75	27	20.25	44.25	27.5	45	21	23.75	24.5
65	43.25	22.25	10	25	20.5	51	31.25	57.75	32.25	25.75	19.5
31.75	37.5	8.5	6	18	17.25	39.75	25	29.5	18	29.75	16.25
23.25	29.5	7.75	3.5	13.75	6	27.5	18.25	26	13.75	13.75	21
50.5	29.5	20	7.25	23.25	16.25	33.75	25.75	36.75	20.25	22.25	20.25
36.25	34.25	12.25	6.5	15.5	14	26.5	17	38.25	14.75	18.75	20
32	22.5	6.25	3	11.25	11	31	22	35.5	16.25	13.5	19.75
40.75	33	12	2.25	12.5	15	36.25	25.5	37	29	13.75	21
33.5	27	17	8.25	18.5	15	29.25	28.75	34.25	19.25	17	17
40	33	13.75	5.75	22.5	10.25	31	30.75	37	15.25	16.5	21.75
24	26.25	16.75	5.25	23.5	20	35.5	18.75	30.25	16	11.25	25.25
31.75	24.5	13.75	3	14	13.25	33.25	22.75	37	14	17	21.25
47	36.5	19	9.5	21.75	23.5	41	24.75	52.75	25.25	21	24.75
38.25	35	16.25	4.75	26.5	17.75	40.75	25.75	40.75	15.75	22	22.25
26.5	22	8.5	5.5	14	17.25	31.75	23.5	28.25	19.25	17	22.25
30.75	39.25	17	7.5	27.25	15.5	42	23.75	31	16.75	25	21.75
36.75	32.25	11	7	21.75	15.25	37.25	26.5	38	18	17.25	24.75
42.75	30.25	19.25	6.75	15	19	33.25	22.75	40.75	22.5	17.5	17.75
25.25	26	11.25	5.75	20	18	36	22	26.75	15.5	17.25	13.75
24.5	32.25	10.25	5.25	21.75	13.25	37	22.25	32	17.5	18.25	17.5
72.75	44	20.75	9.25	28	16	41.5	36.75	57.25	21	32	27.25
29.25	21.25	9	6.25	13.25	19.5	45	18	28.5	15.5	20.25	18
33	27.25	10.75	9	20	17.5	50.5	40	40	30.75	29	18.5
53	30.5	15.5	8.25	25.5	17.25	45.75	35	51.75	25.5	33.5	16.75
30.75	28.5	11.25	8.75	23.5	20.25	48.5	23.5	27	23	27	22.25
26.5	33.75	5.5	6.5	22.25	18.75	48.5	20.75	26.75	34.25	36.25	19
29.5	29.75	5.75	8.5	16.75	23.75	48.5	29.25	37.25	24.25	36	20.25
45.5	53.5	10.75	14.25	27.75	36.5	70.5	38	40.5	33	44.5	16
82.5	58.75	20	19.25	25.25	30.5	98.5	35	38	31.25	45.75	18.25
61.5	50	12.5	14.75	29.25	37.25	79.5	42.25	47.75	24.5	44.25	31.25
61.25	47	13	15.5	33.25	37	79.5	38.5	39	24.25	41.75	27.75
40	43.75	10	13	32.5	31.25	53.25	38.75	42.25	23.5	40	23.25
69.5	75.25	14	8.5	41.25	40.5	90.5	33.75	25.25	24.75	37.5	25.75
39.75	59	15.5	12	42.75	27.5	64.5	32.25	26.75	19.75	37.75	27
36.5	45	12.25	5.25	23.5	27.75	31.25	26.25	33.75	18	24	24.5
44	43	9.5	8	27	24.25	36.25	31.25	29.25	24	26	20.5
45	50	10.5	7.25	18.5	31.75	34.75	34.75	50.75	26	24.75	25
49	32	9.5	8	28.75	28.25	43.5	25	37.5	16.75	16.5	22.75
55.25	43.5	20	7	33.25	19.5	55	31.5	43.25	20.25	22.75	28.5
37.25	31.25	13	5.25	14.25	22	40.75	29.75	39.25	17.75	20.25	19.5
53.25	47	21.5	11.5	17.25	28	33	32.25	33.5	14.75	21.5	23.75
34.5	35.5	12.5	5.25	21.25	23.5	49.5	20.25	27.5	20.5	10.75	27.25
37.25	27.25	12.75	4.75	9	20.75	34.25	19.5	30.25	10	12.25	15.5
23.5	28.5	17	2.5	19	15.5	41.5	16.25	23.25	10.75	16.5	19.75
29.75	34	14.5	3.75	13.75	19	40.5	28	39	14	23	19.5
41.5	39.5	17.75	6.75	23.25	25.75	50.25	41.25	46.5	29	27	31.25
68	48.5	30.75	21.25	30.5	27	49.25	31.5	57.5	28.75	30.5	23.25
30.75	29.25	13	5.75	11.75	18	36.5	31.5	35.25	21.25	25	17
30.25	31	8	8.25	19.75	17.75	34	19.75	26.5	20.25	24.5	26.5
36.25	40.75	7.5	11.25	18.25	29.75	37.75	26.75	29	27.5	29.75	25.75
73	67	14	23	40.5	37.25	71.5	32.25	38.75	32	48.5	31.5
57	60	12.5	12.5	41.5	36.5	70.5	38.25	24.25	30.75	29.25	32.75
39.5	56.25	13.5	11.5	43.75	33.75	68.25	30.75	27	20.5	34.5	26.25
43.25	44	14.75	8	17.5	27.25	28.25	29.75	60.75	28.75	25.5	32.25
60	52.5	17	6.75	32.25	18.5	29.25	37	41	23.25	20	26
55	46.25	16	6	21.25	20.25	52	33.25	47.5	17	22	28.25
51	34.5	18.5	7.75	22.75	22.25	38.5	28.5	43.5	21	22	32
31.25	31.25	13.75	4.25	17.25	26.25	28.75	21.25	32.25	14.5	18	27.75
26.5	32.5	12	4.25	18.75	20.75	42.75	17.5	30.5	20.25	15.25	17.25
21.75	34.25	18	3.5	18.25	18.5	38.5	21.75	28.25	19.5	9.25	21.25
35.5	28	19.5	4	16.5	15.5	37.25	25.25	22	18.75	15.25	20.25
29.25	32	12	6	26.25	20.5	34.5	27.5	41.25	18.5	21.75	19.75
45.5	34.75	23.5	7.25	15.5	15.25	29	30.75	49.5	26.75	21.75	27
47	33.75	21.75	12.25	16	22.75	42	32.5	60.75	30.5	20	25.25
33.5	35.75	10.25	2.25	21	19.25	38	33.5	29.75	14.5	11.5	19
17.75	28.25	9.75	3.75	13.25	21.25	35.75	18.75	34.75	12	12.5	15.75
44.25	27.25	10.75	9	15.5	17.25	33.25	22.25	29.25	19	18	26.75
33.75	31.25	11	2.5	18.25	19.75	26.75	22	32.75	17.5	18.75	17
54	35.5	12.25	4	19.5	15.75	40.5	29.5	43.75	14	14.5	19.25
30	34.5	9.5	2.75	12.5	16.25	33.75	20.25	28	17.5	15.25	23
42.5	31.75	15	6.5	21.5	21.25	43.75	26	39	24.5	27	16.75
44.5	29	17.25	8.75	16.25	16.75	35.75	30.5	59.75	26	25	22.5
50	44	17	7.25	16.5	14.25	24	35.5	53	25	26.5	16.75
14.5	27.5	5.5	2.75	12.25	12.5	29.25	13	12.25	7.25	11.5	18.5
29.75	25	10.75	4.25	12.5	16	33.75	22.75	31.25	16.25	13.25	20.25
36	29.5	8.75	4.75	19.25	17.25	37.5	26.5	26.5	18.5	17.75	24
28.25	31.75	9.75	4.5	23.5	17.25	53.75	22	34.5	16	21	20.5
59	45	21.5	10.75	19.5	14.75	45.25	30	49.75	18.5	39.25	18
29.75	33.25	13.25	9	26.75	18.75	48	18.75	33.75	20.25	27.25	20.75
29.5	31.5	11.25	8	21.75	20	51.75	25.75	36	16	27.75	21.25
62.25	37.5	21	8.5	30.25	16.25	42	35.75	49.25	25.25	40	27.5
41.25	24.75	12.75	5.75	13.25	14.75	40.25	30.75	63.75	31.25	27	20.25
22	28	4	1.75	12.25	5.5	23.25	12.25	15.5	9.5	9.5	25.5
27	36.5	6.25	6.5	21	13.75	31.5	19.5	18.75	15	18.25	22.25
20.5	28.5	12.5	1.5	16	11	25.75	14.5	18.5	14.25	21	25.5
27.5	27.25	10	2.5	14.5	16.25	22.25	25	33.75	18.25	18.75	23.25
27	26	8.5	6.5	23.25	11.75	45	13.75	28.75	13.25	14.75	20
31.25	23	15	4	17.5	14.25	29	28	35.75	17.5	18.75	21
50.75	33.5	19.5	5.5	21.25	17.25	29	33.5	47.25	26.5	22	21.25
47	27.5	11.25	4.75	21	16	31.25	24.75	33	13	12	18.25
23.75	27.75	8	4.5	19.5	15.5	22.75	21.5	21.25	18.75	19.5	21.5
32	29.75	13.5	5.25	20.25	13.75	28	23.5	41.25	16	15.25	20
31	27.5	7.75	3.75	21.25	25	44.25	25	29.5	13.75	11	22.5
48	28.5	19	10	18.75	12.25	25.25	30.5	64.75	29	27	25
37.25	25.25	12	8	27.75	24.75	52.5	28	34.5	20.5	17.5	26.25
18	20.75	10.5	3.75	17.25	12.25	28.75	19.75	26.25	13	12.75	22.5
42.25	31	15	6.5	17.25	19.5	29	27	50.75	29.25	20	22
28	26.5	17.25	7.25	22.75	17	31.25	22.75	30.25	18.5	15.5	19.75
37	28.5	7	7	9	14.5	37	22.75	28.25	16.5	12	24.75
36.75	26.5	13	4.75	18.5	15.5	36.25	26.25	44.75	18.5	13.75	16.75
39.5	26.5	15.75	7.25	13.75	15.25	28.25	24.75	32.25	15	16	17
31	29.25	10.75	4.25	25.75	13.75	33.5	19.75	32.75	11.5	17.5	16.75
39	29	16.25	8.25	27	20.5	36.5	33	52.75	20.75	25.25	22.25
32.75	31.25	9.25	5.5	21.5	14	30.25	20.25	23.75	16	21.25	23.25
46.5	29.75	14	7.75	10.25	17.25	33.75	24	45.75	22.75	23	18.25
34	26.25	11.5	6.5	22	14.25	47	21.25	34.5	13	22.75	22.5
25.25	33.75	8.25	7.75	18.25	25	61	25.75	31.5	16.75	28.5	17.5
46	39.75	22.25	9	23.75	20	46	30.25	32.75	21.75	35.5	21
45.75	36	14.25	8.5	25.75	14.75	41	26.5	34.75	10.75	23.25	14.25
27	30	6.75	5	20.5	10.5	32	22.75	23.5	14.75	16	22.5
31.25	33	11	4.75	18.5	13.5	22.25	24	32.25	16	19.25	23
37	25	10.75	2.5	16.75	15	24.25	17.25	36.75	15	14.75	17.25
50	28.5	12.75	3.25	19	13	38.75	27	39.25	18.25	14.25	26.25
41.25	27	13.5	2	17.5	14.5	36.5	19	29.5	12.5	11.5	18.5
26	18.25	7.25	5.5	16.25	11	40.5	13.25	31	13.75	18	25
32.5	31.5	13	4	24.25	13.5	31	26	31.25	19.75	18.25	15.75
29.5	30.75	11.75	7.5	19.75	20.5	33	17.5	42.75	24	16.75	22.5
36	24.5	16.5	6.75	17.75	15.5	34.75	27	41.75	19.75	16.5	20.75
47.75	29	13.75	4	21.5	17.5	50.25	24	36	17.5	19.75	19.75
40.25	33.5	11.25	7.5	23	17.5	50.75	19.25	34.25	25	21	26.5
37	32.25	10	6.25	18.25	12.25	34.75	26.5	35.5	24	22.25	23.5
26.75	28.25	10.5	3	13.25	11.25	28	25.75	24.75	11.75	21.5	14.5
38	25	15.75	6.75	18.25	13.75	40	19.5	38	18.75	19.75	17.25
21	20.75	5	4.5	10.5	7.75	29.5	12	22	12.5	10.25	11
34.75	27.5	18.75	6.25	14.75	21.25	28.75	24.75	53.75	22	12.75	20
45	33	12	3.5	24.5	12.75	28.75	27.25	37.5	18	12	14.5
26.5	18.75	11.5	3.75	26.75	13.75	37	24	27.25	12.25	15.25	21.75
40.5	32.25	16.75	10.5	17.5	15.75	31	34.25	43	24.25	21.5	17.75
32.25	23.75	16.75	4.5	16.25	14.25	41.25	26.75	37	15.75	20.75	17
66.75	35.5	22.5	9	29.25	15.5	36	37.25	48.5	27.25	26.25	23.5
31.25	25.25	11.25	6.75	18.25	9.5	26	16	24.75	13	7	15
26.25	27.25	7	2.75	16	14.25	37	15.75	27.5	17.25	14.5	18
19.75	23.75	12.5	3.25	22.25	14	42.5	18	23.75	14.25	16	27.25
18.25	17.5	7	4.5	9.5	16	41	27.25	38.25	10.75	22.75	13
40	35.25	15.75	5.5	22.5	13	45.75	23.5	38.5	22	23.25	27.25
43.5	28	9	5.25	25	16.5	50.25	30	38.25	13.75	31.75	19.25
47.75	38	15	8	20.25	19	53.25	37.75	42.75	23	34.75	18
60.75	42	17.75	10.5	34.5	17	47.25	26	43.75	18.25	27.25	25.25
17	21	9.5	4.25	19	15.5	23.75	21.25	22	17.25	24	20.75
27.25	22.75	7.25	8.5	12	12.5	29.5	33.25	41	18.75	31.25	22.25
18.75	31.25	3.75	5.25	18	15.5	44.25	14.5	28.75	19.5	27.5	26.75
24.75	38.5	7.25	6	19.25	31.75	51.75	24.75	30.5	22.5	25.5	18.5
37.25	44	8.5	5.75	24.75	26	61.75	37.75	39.75	31	33.25	20.5
24.5	44	7.25	7.5	21.5	19.5	43	26	18.75	16.75	44.25	21.5
34	40.75	7.25	6	16.75	20.75	42.5	20.5	20.5	10	30.5	20.25
32.75	33.75	9.5	4.25	25	15	34.75	23.5	26.5	14	16.25	20.5
39	35	16.75	6.5	15.75	19.5	31	32.5	56.5	15.75	18.75	23.25
57.5	42.75	22.75	7.5	26.75	19.5	30	34.5	54	20.75	18	19.75
56.25	36	17.75	9.75	26	16.25	38.75	32.75	45.5	22	19.25	22.75
23.25	32.5	8	2.75	18.75	26.25	45.75	11.75	20.5	15.75	14.75	17.5
16.5	15.25	6	2.25	16.25	11	30	21.25	27.25	8.75	17.5	26
37	28.75	10.75	3.25	16.25	11.25	29	20.75	31	11.25	17	27
31.25	26.5	10.75	3	18.75	11.25	31.75	24.75	44.5	17	21.25	24.25
53	37	18.5	7	14.75	16.75	26.25	30.25	50	25.5	15	21.25
47.75	29.25	24.5	6	24.25	14.25	43.75	26	38	23.25	16.75	18.75
33.75	31.5	19.5	4.5	23.75	13	31.75	25.25	24.75	17.75	11.75	23.75
26.25	26.25	10.5	4.25	15.25	14.75	43.25	22.5	28.5	10	21	20.75
36.5	30	11.5	3.5	15.5	11.25	32.75	28.25	27.75	19.75	23.25	20.75
53.25	32.75	19.75	8	18	22.75	35.25	43.5	53.25	25.25	35.75	24.75
28.75	29.5	8	4.5	16.5	17.5	46.25	17.75	29.25	12.5	21	17.75
43	40	19.5	8.25	39.25	17.5	53.25	33.75	37.5	16.25	27.5	16
47	33.25	14.5	5.75	22.25	18.75	49.25	34	32.75	16.5	32.75	12.5
27.25	41.25	10	6.5	15.5	19.75	47.5	23.5	29.5	14	33.5	23.75
28.25	42.5	6.5	6.5	22.5	22.5	37.5	29.25	23	17.5	32.5	21.25
48	34.25	7.5	4	30.75	10.5	20.75	35.25	30.75	14	21.25	21.75
45.75	38.25	11.5	7	23	13.75	25.75	23.75	45.75	16.75	26.25	22.75
55.5	35	17	5.5	19.25	26	23.5	37.5	69.25	28.25	25.25	18.25
39.25	31.75	20.25	4.5	21	11.25	27.5	18.25	34	12.25	13	19.5
30.5	28.75	7.75	5.75	21	18.75	51.25	17.5	25.75	12.25	10.5	21.25
35	26.75	14.5	4	18.25	25.5	32.5	30	52.25	19.75	22	20.5
22.25	27	9.75	2.5	20.25	19.5	31.75	25	23	7.5	12.75	19.75
29.75	24	7.5	4.5	11.75	13.25	42	17.25	36.75	12.25	19	17.75
33	30	13.5	2.75	31.75	15.25	21.75	33.25	35.75	19.75	23.5	22.5
60.5	40	21.5	7.5	17.5	14.75	39.5	35.25	50	21.25	21.75	27.25
23.5	25.5	15	3	22.75	12.25	32.75	22.25	29.5	14.25	15.25	18.75
26.5	18.75	10	5.75	19.5	16.75	48	22	34	14.5	28.25	24.25
29.75	31.75	12.5	6.75	19.5	17.75	41	20.75	27	10.25	25.5	18.75
50.5	35.5	15.25	7.5	17.75	14.25	43.75	26.75	41	18.5	38	25.75
28.25	30.25	8.75	6.5	19.75	19	49.5	30.25	37.25	14	33.25	16
46.75	29.75	13	8	17	15	39	30.25	47	21.75	28.5	19.5
27.75	20.5	5.25	7	15	9.5	27.75	21.25	25.75	18	16	21
19	20	8	2.5	15.5	9	30.25	14.5	26	13.5	14.5	24
28	29.75	7.75	4.25	13.5	11.75	29	21.5	27.25	18.5	14.5	17
22.75	24.25	8.5	5	15.75	10.75	24.5	27.75	19	14	14.75	21.25
42.5	33	21	5.25	18	15	31.25	25.75	48	20.25	12.5	26.5
24.75	23	14.5	4.25	27.5	13.25	31.25	17.25	22.75	17	10.5	21
27.25	30	9.75	3.25	16	14.25	35.5	19.25	27.5	13.25	12	22
37.25	24.75	11	5	26	13	27.5	28.25	39.5	17.5	21.5	20.75
29.75	21.75	12	4	16	16	26.75	22.25	43.25	17.25	16.75	19
44	31	12	4.5	17.25	14.75	26	29.5	35	17.5	15.25	21.5
16.75	20.5	6.75	2.5	22.75	11	34.25	13.5	21.75	10.25	9.25	19.25
18.5	20.75	8	1.5	11.5	14.25	39.25	15	22	6.75	13.75	21.5
40.25	31.5	14.75	7.25	21.25	15.25	40.5	29.25	41	21.75	24.5	18.5
48.5	30.5	12.75	10	22.5	19.75	42.75	28.25	46.25	12.5	29	19.25
22	28.5	10.75	5	14.75	10	43	13.75	19.75	11.75	22	18.75
37.25	33.5	13	8	14	18.5	43.25	30.5	39.25	18.75	25.5	26.75
49.75	37.5	14.25	5.25	19	16	27.75	36.75	52.75	23.75	22	19
45.25	24.5	13.75	5	16.75	13.75	33.5	21.5	43.25	19.75	13.25	22.25
33.25	30.75	10.25	5	13	15	30	19.25	21.75	13	17.75	15.5
31.5	24.25	11.75	2.25	20.5	8.75	32.5	21.5	33	17.25	15.5	22.5
29.25	29.25	12.25	3.25	16	19.25	30.5	16	25.25	13.75	9.25	13.75
38	28	16.75	3.75	24.75	15.5	30	27.75	47.25	17.25	20.5	17.5
41.25	29.75	15.5	11.5	18.25	11.75	31	29.25	43.5	15.25	17.75	18.25
48.25	26.75	18.25	4.25	23.5	13	32	23.75	31.75	11	20	22.5
27	28.5	7.5	3.5	26.25	14.5	44	22	22.25	15.25	27	19.25
48.25	32.25	18.25	6.5	22	24	44.25	26	35.25	19.25	30.5	25
40.5	31.5	15	7.75	12.25	18.75	44.25	29.5	45	23.25	21	20.5
26	21	10.75	6.5	21.75	16.5	37	22.5	29.25	11	26	20.5
16	17.25	5	3.25	24	14	32.25	18.75	21.5	14.25	30.25	17.25
43.75	54.5	13.75	12.25	38.75	31.5	76.25	46.25	36.5	22.25	40.25	18.5
22.5	36.25	5.5	7	18.5	21.25	56.25	39.75	36.25	25.25	32	22.5
36.75	57.5	5.75	9.5	23.5	29.25	62.75	39	39	23	32.75	24.75
43.25	57.5	9.5	9.75	21.5	31	58	32.5	34	17.75	42.25	26.25
49	48.25	4.5	8.75	17.5	30.25	54.5	29.5	44.25	19.25	36.25	21.25
27.75	37	8.5	6	25	34	57.75	46.75	31.25	16.75	30.5	24.5
30.5	28.75	6	5.25	15	22.75	35	29.75	22	14	27.25	22.25
39	35.5	9	8.25	21	31.5	51.25	37.75	46.75	28	32.5	27
30	36.75	7	7	19.5	26.25	36.75	37.5	37.5	19.25	32	27.25
35	52.25	7.5	6	27.75	25	64.25	26.5	27.25	19.5	33.5	27.75
33.75	55.75	7.5	10.25	35.75	33.5	89	32.75	30.5	20.75	37.75	29.5
18.5	44.25	5.5	6.75	20	15.25	53.75	24.75	16.75	7.5	35.5	22.75
22	41.5	4	5.5	9.5	15	26	23	18.75	10.5	24.75	22.75
38.75	47.5	7.75	6.5	43	18.75	37.75	26.75	19	17.75	25	26.5
47.75	47	14.75	9	36	24.25	49	31	44.5	21.5	28.5	26.75
33	34.25	12.75	8.75	15.5	31	42	24.5	47.25	14.5	16.5	24.25
31.25	43.25	8.5	10	22	18	39.5	22	23	14	14.5	22.25
43.75	37	9.5	7	31.75	15.75	30.5	34.25	50	12.75	24	23.25
45	47	17.5	6.75	26	20	42.25	28	30	22.25	25.5	24.5
66.5	48.25	23.75	14.75	19.25	26.75	56.25	41	60.75	32.5	30.75	23.25
75.5	59.25	23.5	8.5	34.5	20.75	42.5	38	37.75	20.25	30	22.25
52	43.25	19.75	9	13.25	21.75	34	44	49	20.75	40.75	30
76.5	63.75	18	18.75	19	34.75	62.25	45.5	55	23.25	42	35.5
50	60.25	8.5	10.25	28.75	41.25	83	37.25	44	24.5	28	29.5
39.75	41	8.25	11.25	23.25	22.25	65.25	32.5	29.5	24.25	30.75	26.5
78	72	13.75	27.25	20.5	45.25	94.5	24.75	45	22.5	52	25.5
83.5	69.75	22.75	29.5	23.75	34.75	79.75	34.25	53.5	27.75	38	30
94.5	70.5	24	33.25	41.5	50	113	52.75	61.5	22	46.5	32.25
82	62	21.5	19.75	38.75	47.25	100.5	42.5	54.25	24.75	47.75	37.5
94.75	65.75	18.5	17.75	41	34.25	89	30.25	33.25	13	48.5	35.75
59	53.5	14.75	14	38	41	70.25	30.5	37.75	16.25	37.5	26
73	56.25	26	26	45.5	55	84.25	42.5	56.75	19.25	51.5	35.5
76.25	53.25	22	22.25	26.75	40	57.75	43.5	53.75	28.75	50	21
53.25	65.5	9.5	13	32.5	44.5	58	35.25	37.25	26.25	36.5	30.5
63.75	58.75	14.25	15	33.75	37.5	60.5	36.25	40.5	32.25	33.75	28.5
46.25	55.5	8.5	9.25	26	32	56.5	28.5	36.5	23.75	28.75	30.5
44.25	53.5	8.5	9	36.5	29.75	59	28.25	23.5	17.5	29	25
68	55.75	15.5	17.75	35	41	85.75	29	29	18.25	48.5	31
76.75	63.5	26.75	17	28	30	56.5	35	73.25	24	50.5	28
68.75	59.75	18	19.75	21	33.25	54.5	46.75	69.75	25.75	55.5	29
69.75	59	20	20.25	34.5	39.25	47.75	32.5	47	16.75	37.75	32.75
32	48.25	8	11.5	33.25	32.75	56	31.25	31.75	18.5	31	27.75
22	44.25	6.5	5.5	22.5	18.5	48.5	26.25	29.5	19.75	23.75	28.5
66.25	64	19.25	10.5	73.25	39.25	65.25	27	24.75	13.75	40.5	33.25
29.75	42	4.5	5.75	20	23.75	48	27.25	21.75	10.25	30.75	27.25
46.75	40.75	19.75	7.25	35.5	19.75	32.5	22.5	31	14	17	28.25
49	41.5	15.25	8.5	16.25	26	38	35.25	63.5	21.25	32.25	28.5
37.25	33	13.5	6.25	19.75	21	35.5	30.25	59.75	22.25	16.25	25.5
34.25	36.75	8.5	4.75	16.5	12.75	38	19.5	38.5	15.5	16.75	22.5
52.75	49.25	22.75	11.25	35.75	16.5	28.5	36.25	49.5	21.75	21.5	33.25
33.5	33.5	15.5	4.75	13.75	22.25	41.75	21	34.75	13.75	19.25	22.25
38	42.75	19.5	5.5	30.5	25.5	39	23.75	43	12.5	21.75	28.5
35.25	39	12	5.25	25.25	17	37.25	20.25	27	9	13	26
23.75	35.5	7.25	3.25	20.5	15.5	38	19.5	34	12	15.5	20.75
30.75	41.75	11	6	16.5	16.25	42.5	27.5	42.75	16	27.25	25.25
36.25	41.75	8.75	8.5	25.25	21	36.5	30.75	48.25	26	25.25	27.5
36.5	43	9.75	3.75	19	10	34	38	32.25	14	22.25	22.5
34.75	48	7.75	4.25	35.5	17	42	22.25	21.75	15.75	23	28.75
33	39.75	10.25	3	25	14	24.75	18.25	15.5	9.25	23.25	28.25
30.25	28.75	13.5	5.75	22.25	17.75	28.25	32.25	17.25	11.25	13	27
22.75	31.75	6.75	6.75	14.75	16.75	20.75	21	39	14.75	17.25	22.25
27.5	31.25	5.75	1.5	14.5	19.75	36.5	13.75	24.5	8.5	12.75	23.75
33.5	44.5	12.75	10.75	25	22	32.5	31.25	35.25	20.75	13.75	23
39	37.75	16.5	7.75	16.75	16.75	27.25	34.25	40.5	15	16.5	21.25
64.5	49.5	18	7.5	35	18	34.5	31.75	52.25	22.5	24.25	19.75
27	28.25	10	2.5	16	13.75	42.25	13	34.75	7.5	17	17
27.75	33.25	8.75	3.5	13.25	11.5	36	12.5	22.75	10	11.5	24
25.5	32	14.5	3.75	24.5	17.25	40.75	22.5	26.5	16.75	17.75	23
29.25	28.25	15.5	4.75	10	19.75	23.75	26.5	49.25	13.75	21.25	15
41	35.25	15	4.75	32.75	14	35.5	28.25	37.75	21	13.5	15.75
29.5	34.5	13.75	6	13.75	13.75	39.5	27	29.5	17.75	19.5	26.75
26	25	8.25	4.5	18.25	17	35.5	19.5	32	12	24.75	20.5
28.75	26.75	10	4.25	16.5	16.75	18.75	23	32.25	17	19.75	23.75
34.25	37.5	8.75	4	22	9.75	15.5	16.75	22.75	16.5	10.25	20.5
31.5	34.5	11.25	2.25	10.25	10	26.75	16.25	28.25	15.25	12.25	18.5
22	27	7	2.75	25.25	13.25	16.25	17.25	21	9.5	10	17.5
26	21.25	14.75	5	14.25	12.25	25.25	18.75	27	9.25	16.75	23.5
38.75	37.25	17.25	3.5	25.25	16.75	37.75	31.25	42.5	14.5	19.5	26.25
53	28.75	14.5	5	17.75	12.5	23.25	27.5	44	19.75	19.5	22.5
29.5	35.25	10.25	4.5	23	23.75	38.75	17.25	34.25	14.75	13.25	18.75
15.25	20	7	2.75	9.5	8.75	24.75	19.5	22.5	7.25	15	17.25
31	30	16.5	5.75	21.25	17	37	25.25	43.5	19.25	16.25	18.5
27.75	28	7.75	2.75	13.25	14.75	37	17.5	24.5	14.25	14.5	20.5
36.5	29.75	15.5	6	21.75	11.75	34.75	20.75	37.25	20.5	20.5	16
25	27.75	7.25	2.5	15.75	25.75	30.25	12.5	17.25	11.75	6.75	15
40	27.25	12.5	5	15	13.25	27.25	30.5	41	14.25	23.5	23
21.5	21.25	7	3.75	12.75	14	28	14	26	11	9.5	19.5
27.75	25.25	17	3.5	16.5	11	30	19.5	29	12.25	14.75	24.5
31.75	29.75	9.75	4.5	22.5	15.25	32.5	20.75	34	13.5	24.25	20.25
41.5	39	17.75	7.75	22.75	17.5	41	28	42.25	25	19	22
29	32	5.75	5.25	26.5	10.5	19.25	18	22.25	15.25	20.5	26
30.25	28.5	7	2.75	13.5	8.25	18.5	18.25	32	12	11.25	17.5
38.25	30	16.75	2.75	14	16.75	25.5	23.75	43	19.5	12	17.75
28.5	23.25	9.75	3	11	11.75	38.25	16.5	20.5	7.25	8.75	22
29.5	32.25	11.5	3	17.25	11.5	37.5	16	26.75	16	7.75	16
23.75	23.75	12.25	5.5	22.25	16.25	28	26.5	36.75	9.75	19.5	27.75
38.75	30.5	8.75	5.75	18.75	9.75	32.5	32.75	35.75	10	21.25	24.75
65.25	40.25	23.75	11	28.5	10.5	54	34.75	50	18	32.75	24
35.5	32.25	13.5	7.5	13.5	12	40.5	21.75	27	11	19	20
21	27.25	11.5	2.25	12.25	6.75	23.5	16.5	19.5	10.5	8	18.75
17.25	25.75	5.75	1.5	15.25	19.5	31.5	13	23.25	13.75	11.25	17.75
18.5	17	14	5	19	7.5	17.5	21.25	32.75	13.25	18.75	22.25
26.5	19.25	7	8	14	16	29.25	19.75	25.75	12	8	17.25
33.5	21.25	9.25	4.5	13.5	12.25	30.25	23	47.5	18.5	16.5	19.75
42.75	26.75	13	4.75	14	11	30.25	24.75	41.5	13.25	21.25	19.75
39.75	27.75	10.5	3.25	24	9.25	41	24	33	14.25	18.25	20.25
25.5	34	7	4.75	14.75	15.75	40	24.25	25.25	14.75	18.5	20.25
30.5	27	12.5	3.75	20	16.5	42.5	14.75	24.5	8.75	25.5	18
34.75	32.75	12.5	6	21	10	26.5	25.25	36.5	19.75	21.5	23
37.75	28.25	14	6.25	18.25	10.75	26.75	22.5	38.25	19.5	10.75	20.5
24.25	24	10.25	1	16.5	7.5	21.25	15	30.5	9.25	14	10.5
35	32	12.75	4.75	19.75	16	26.25	22	33	13	16	18
51.25	28.5	12	2.5	14.75	11	33.75	19.25	29.75	11	14.25	16.75
32.5	24.25	8	2.75	12.75	10.75	33.25	16.25	28	9.5	15.5	17.75
21	19.5	8.25	3.75	15.75	16.5	31.25	25.25	36.5	12.75	22	20.5
34.25	30	13.5	4	34.5	10.25	38.5	21.5	25.5	13.75	23.5	23.5
39.25	30.75	10.5	3.25	18.5	9.5	33.25	24.75	35	13	22.75	13.25
23.25	22	4.5	1.5	11	6.25	14	18	21.25	9.5	14.25	16.75
26.5	22.25	6.5	5	11.5	12.5	28	15.75	27.25	11	11	20.75
29.25	27.25	15.5	5.5	19.5	9	34.5	15	30	14.75	11.5	27.5
28.25	31.25	13.25	4.75	23.75	19.5	33.75	20	39.5	16.75	14.25	20.25
29	17	17	2.75	19.75	10	23.75	21	31	13.25	18	21.25
41.25	26.25	13.25	2.75	17.75	8	32.5	29.5	39.5	14.25	16.25	16
44.25	35.25	16	6.5	21.75	14.5	36	27	41.5	15.5	17	18.75
18	23.25	14	2.5	17	16.75	31.25	18.25	25.25	7.5	18.25	23.5
30.75	24.5	12.75	3.75	17.25	12	27.75	21	52.75	15.5	18	24
26.25	12	12.25	3	19.25	11	30.5	26.5	25.25	14	13.5	17
22.25	22.5	7.75	3.25	17.5	8	33.25	21.75	24.5	9.5	19	24
32.25	34.5	14.5	4.75	21.25	18.25	48.25	21.25	35.75	14	20.5	24.75
27.5	21.75	9	3.75	23.5	10	27.5	20.75	30.5	14.25	15	23
45.25	29	9.25	4.75	17.75	6.5	12	20.75	32.5	14.75	17.25	20
24.75	26.25	7	3.5	13.25	11	25.25	21.25	29	12	12	24
26.5	36	13.25	6.5	19	15.25	23.75	22.25	30.25	13.25	13.75	19
45.5	30.25	17.5	3	17	13.5	39.25	30.5	44.75	23.25	23.5	19.75
26	23.75	9	2.75	15.25	9.75	30	22.25	25.25	15	8.5	21.75
27.75	23.5	8.75	7	21	16.5	39	24.75	28.25	16.25	21	21
25.25	24.25	10	3.25	17	14	42.5	25.5	30.5	9.5	22	22.25
38.75	22.75	13	8.75	20	9.25	27.75	23.5	26.25	9.5	21.5	26.75
55	38.25	17.25	7	27	14.25	44	30	61.5	18.25	30.75	22
30.75	33	11.5	6.5	18.5	12.25	50	20.75	26.25	17.25	27.75	20.75
31.75	25.75	9.5	6.25	25.5	15.25	51.5	26.75	36	15	32.75	26.5
36	31.5	13	6.75	20.5	11.5	48.5	23.5	42.5	16	31.25	17.5
34.75	37	13	4.25	14.75	12	30.25	19	33	15	26	13.5
17.75	23.75	6.5	4.25	21	9.25	21.5	16.75	22.75	10.75	12.25	21.25
26	39	16	6	16	12.25	16.75	20.25	23.5	9.5	17.75	20.25
35	28.5	16.25	7.5	18	11	28.25	18	37.75	18.5	14.25	14.5
33	22.5	13.25	5.25	12.5	18.5	29.25	19.75	39.25	16.5	12.25	27.75
25	28	6.25	3	11	9	30.25	15.75	29	12.5	11.5	18.25
41.25	34.75	17.25	3.75	21	13.75	36.25	26.5	42.25	14.75	20	22.5
43	32.75	13.75	4.75	20.5	14.5	28.5	20.5	35.75	17.75	16.75	17.5
20.25	16	6.75	4	14.25	13	38.75	19.75	33.75	11	27	16.75
32.75	25.75	12.75	6.5	21.75	13.5	43	24.25	31	16	29.25	24.75
34	28	13.75	3.25	18.25	13	37	21.25	38	14.25	18	19.25
31.25	29	14.5	3	22	14.75	29.25	16	28.25	13	10.75	18.5
38.25	35	13.25	6.25	21.5	18.75	33.75	17.75	40.5	19.5	12.5	17.75
29.75	25.25	10.75	3	10.75	9.25	34	17.5	35.25	8	22	12.5
21.75	22.25	7.5	4.25	20	12.25	32	15	24.5	7.25	16.5	20.25
42.25	34.5	13	5.5	24.5	17	51	24	27.25	20.5	20.75	21.75
44.75	31.5	16	5.75	12	18	43.5	24.25	40.25	16.25	25	21
37.5	29	10.75	6.25	19.25	12	55	22.75	38	15.75	28	22.25
45.75	37.25	11.25	6	32.5	11	35.75	27.5	31	13.5	31	15.75
49	36.25	22	7	19	11.25	37.75	26.25	43.5	17.25	23	19
29.75	29	13.25	4.5	22	10.25	34.25	18.5	33.25	12	22	16
21.25	29.75	3.25	1.25	15.5	6.25	29.5	13.75	17.5	10.75	14.75	22.25
23.25	24.25	8.75	5	10.25	9.75	29.75	27.75	38.5	11.25	15.25	18
18	20.75	8.5	2.25	18.5	16	40.75	14.5	21.5	13.25	11	18
33.25	32.25	17.25	5	18.25	18	33.75	31.25	45	17.25	23.25	21.25
31.75	24.25	15.5	3.5	16.5	6.5	23	15.75	30.25	10.75	15	18
18.5	20.5	9.5	1.75	22.5	12	23	19.75	30	9.5	21.25	20.75
28.5	30.5	12	3.5	21	8.75	39.75	22.25	29.25	13	12.5	21.75
40	26.75	14.5	2.75	15.5	14.75	35	19.75	42.25	12.75	18.25	23.25
44.25	39	21.25	9	24	11.25	35	29.25	42	23.75	17.5	27
42.5	48	24.25	9	32.75	23.5	51.5	26.25	31	12.5	28	20.75
28.25	35.5	4.25	2.25	24.5	10.5	24	25.25	14	13.25	24.25	22
16.5	24.5	7.5	1.5	15.75	13	24	22	34.75	10.25	20.75	15.5
38.5	31.75	14.25	4.75	26	16	28.75	22	36.25	22	16.75	19
29.75	28.75	8.75	4	20.25	12.75	32.75	18.25	29.75	14.25	11.5	20
37.5	17.25	12.75	2.25	15.25	12.5	27.25	25.75	41.25	11.5	15	24
26.75	21.75	10.25	3.25	21.25	10.25	21.25	27	36.25	19.25	20.25	24.75
42.25	32.5	14	4	25	17	39.25	34	44.25	18.25	20	17.25
34.25	29.75	16	6.75	13.25	13.75	36.25	24.75	27.75	13.25	22	17.75
40	36	11.5	4	21.75	10.25	44.25	19.75	32	12.75	14.5	21.5
46	43.75	21.75	4.75	27.75	14.75	39	34	33.75	15	30.25	19.25
24.75	33.75	11.5	5	19.25	11	48.25	19.25	28.25	16.25	28.5	24.25
25.75	16.5	10.5	3.5	20.25	11.75	41.75	23	32.5	15	21.5	19.75
33	30.25	13	5.25	27	14.25	45	26	25.75	12.25	27	22
35.5	31.25	15.75	4.25	14.5	9	25.25	26.5	46	14.75	20.75	17.5
36.5	28.25	14.5	6	18	13.25	33.5	27	48.75	12.25	23.25	20.5
22.5	25.75	8.5	3.25	13	11.75	23.75	19	22	11.25	11.75	18.75
30.5	23.75	8.75	3.25	13	12.5	16.5	21.75	39.25	19	17.25	19.25
20.75	23	10.25	4.25	14.75	8.75	19.5	16.25	23	9.5	15	19.75
25.5	28	7.75	2.75	12.25	11.5	30.75	15.75	33.5	7	15	11.75
27.25	18.5	11.5	1	19.25	7.25	19.5	18	25	9.5	12	23.75
56.75	36.25	13.5	6.75	19.75	15	28	31	49.5	17	20.5	16.75
22	26	9.75	4	25.75	17.5	35.25	9.5	23.75	10.25	19.25	21.5
31	25.5	9	4.75	12.25	8.25	31.25	22.25	20	6.75	20.25	19.25
30	28	14	3.5	15.25	11.75	31	23.75	35.5	12	19.5	20
26.25	18.75	10.5	6.25	25.25	12.25	26.75	24.75	37	10.5	29	21.25
40.75	25.5	14	5.5	14.5	11.75	41.25	27.25	32.5	18.5	28.5	22.25
35.5	31	12.75	7.75	21	17.25	48.25	32.75	38	14.75	32.5	19.5
30	29.5	8.75	5.5	19	14.25	52	18.5	27.75	11.25	30.25	17.5
16.5	24.75	8.5	4.5	23.25	15	33.5	27.25	28.25	10	32.5	21.5
36.5	37	12.75	5.25	34.25	12.5	39.25	25.25	35.25	14.25	35.75	16
25.75	39.5	10.75	4.25	15.75	11.75	37.25	26	19.25	9.5	32.25	19.25
27.75	45.5	7.75	4.5	28.25	18.5	32.75	32.25	15	18	37	27.5
43.25	62.25	13.5	8.75	41.25	41.25	63.5	31.5	17.25	9.5	41.5	38.25
63	76.25	22.75	8.75	46.5	44.25	62	32	17	10.75	39.75	32.5
39.25	70.5	21.25	8.25	43.75	45.5	48.5	33.5	18.75	13	39.25	35
50.5	70.5	21.25	13.25	47.5	49.25	69.5	35.25	25	16	43.25	42
49.5	59.75	17.5	11.5	50.25	33.75	55.25	32.75	20	22.75	31.25	34.75
34.75	48	14	7	42	25.5	33.5	28.5	30.25	13.75	27.25	27.25
47.25	53.75	15	6.25	52.5	42.25	58.75	29.5	21	15.5	41.5	38.5
39.5	69.25	15.75	11.75	55.25	47.5	74.75	34.25	19	14.5	43.75	44
48.25	81.5	14.75	10.25	50.25	53	83	29.5	24.5	24.5	42	33.25
57.25	85	16	13.25	39	54	100	28.5	19.5	23.75	42.75	44.75
53.75	77	12.5	9.25	52.75	38.25	82.75	33.75	22.75	16.25	36.5	42.25
76	75.75	14	13	47.5	42.5	81	29.5	24	22.75	47.25	50.75
59	67.25	12.25	13.5	46.5	40.5	80.75	30.25	26	17	38.5	41.25
53.5	76.25	16	12.25	42.25	35.25	83.25	30.75	30.5	26.5	38.75	33.25
53.5	58	14.5	9.25	40.25	32	50	33.25	22.25	17	33.75	24
46.75	49.5	8.75	7.5	33.5	22.5	19.75	37.25	33.75	23.75	22	23.75
42.75	35.25	13.75	6.75	28.25	22.25	32.25	29.5	49.25	19.75	18.25	23.5
28.75	41.5	6.75	2.5	24.5	13.5	29.75	17.25	17.25	14.25	15	30
31.25	30.5	5	4.75	16.25	18	27.5	25	22.75	16.5	24	20.25
30.5	40.5	8.75	6	23.5	17.5	35	26	22.5	13	23.75	25.25
37.25	39.5	12.25	6.5	21.25	16	35	30.5	42	22.25	19.5	23.5
63	48.25	23.25	7.75	25.5	19.75	36.25	32.25	52.5	27	20	25.5
23.25	30.5	5.5	3.5	19	18	34.5	15.75	12.25	16.75	12.25	22.75
45	39.75	14	5.75	18	12.25	27.5	25.75	31	18.25	16.5	16.25
29	29.25	13	6.25	23.5	20.75	34.75	27	40.5	15.25	23.5	17.5
32.5	35.25	9.5	2.5	25	21	32.5	25.25	29.25	22.5	22	18
36	52.5	9	9	35.75	23	46.5	27.5	17.5	21.75	37.75	28.5
42.25	34.25	11.75	4.5	22.25	19.5	32.25	30.75	40.5	22.25	19.25	24.75
32.5	36.75	17.25	4.5	25.25	22.5	28.5	22	29.25	21	18.75	17.75
26.25	34.25	15.5	2.75	25.5	17.25	43	16.75	24	9	9	24.75
40.5	42.75	13.25	5	28.25	12.75	16.5	29.75	33.75	22.25	23.5	23.25
53.75	35.75	19.75	10.75	20.75	22.25	24	32	60.25	31	21.75	25.75
24.75	33	6	2.75	27.25	30.25	46.25	18.75	26.25	13.5	12.5	19.75
31.25	31	8.5	3.25	12.75	12	31.75	37.5	26.5	11.75	18.75	20.75
53.75	41.5	17.75	8.75	19.75	14.25	35.5	26	42	11.25	21.5	20
28.5	34	9.5	2.75	21.75	13.25	20.5	23.75	26.25	17	16.25	19.25
19.25	22.5	5.75	0.25	20	17.5	32.25	20	26.5	10.75	13.5	21
34.5	38.5	11	6.75	21.25	16.5	31.5	23.75	30.25	19	17.75	29.25
41.25	25.5	13.25	6.25	31.75	17	45.75	21	53.5	23.25	24	23.5
26.25	28.25	12.25	5.25	18.75	13.75	28	18.25	30.25	17.5	12	23
21.25	25.75	10.25	1	19.25	14.75	36.5	15.75	24.5	10.25	16	21.75
21.75	23.25	9.25	1.5	21.5	12	33.25	20.75	36.75	14	14.5	20
18.75	24	14.25	3	16.75	14.75	35.25	22	34.25	14	17.25	23.75
32.75	35.75	16.75	8.25	22.5	17	27.25	26.25	35.25	17.5	21	18
27	26.25	12.25	4	13.75	14.75	34	21.75	30.75	17	15.5	18
15.5	24.25	10.25	2	18.25	11	25	17.5	18	11.75	11	23.75
54.25	32.75	14.75	5.75	19.75	18.5	23.75	38.75	49.75	22.25	25.5	25.75
32.5	36.25	6.5	4	21	17.5	44.25	22.25	26	13	18	18.75
26.5	29.5	7.25	4	14.25	11	31.75	19.5	30.75	7.75	18.75	17.75
16.5	24.25	5	3.5	13.25	9	24	18.5	20.75	16	14	17
41.5	29.25	13.25	2.5	21.75	13.75	34	29.75	35.75	16	21.75	15.25
28.75	32.25	11.25	2.75	22.25	17.25	47	23.25	36.25	14.5	20	19.25
31	31	12	7.5	23.75	17.75	51	40	49.5	18.25	35.75	23
37	26.25	12.5	13.5	27	14.5	47	25.25	28.25	11	37	23.75
45.25	39.5	17.25	9.5	25.5	16.75	49.75	32.5	37.5	16.5	33	18.75
48.75	40.25	14	6.75	25.25	18.5	42	29.75	54.75	19.75	35	21
48.25	42.25	16	8.5	22.75	17.25	52.75	27.5	39	15.25	34.25	22
28	35	12.25	8	25.5	14.75	46.5	19	29.75	12.5	31	24.25
49.25	45.5	11	7	21.75	14.75	43.75	31	34.25	21	31.5	27
25.25	30.75	5	5	12.25	9	19.75	19.25	21	12	20.5	17.75
20.5	34.5	8.25	3.5	16.75	10.75	10.5	21.5	26	8.75	13.5	18.25
30.25	27.25	14	4.5	15	12.75	21.25	21.75	53.75	20	19.75	20.75
31.75	26.25	10	4.5	15.25	16.5	28	27	40.25	10	16.5	22.25
24	38.25	8	4	22	20	38.25	19.25	30.25	14.25	15.5	17.75
22.5	26.5	8	5	15.25	11.5	27.5	18.5	27.5	16.5	11.5	20.75
19.5	35	7.75	2	16.5	9.5	27.25	14	13	5.75	10	20.5
44.5	38.25	17.75	9.5	25	19.25	31.25	33.75	58.75	22.25	24.25	20.5
30.25	26.25	18.25	3.5	26	15.25	22	27.5	40.5	17.75	16.5	24.5
33.25	24.5	11.75	2.75	20.5	9.25	30.75	23.25	32.5	13.25	12	16.5
20.75	23.75	7.75	3	21.25	13.25	35.75	21.75	25.5	13.5	18.75	20
30.25	25.25	10.75	4.5	30	8.75	25.75	26.25	39.5	20.25	23.25	22
28	32.75	10.5	3.25	23.75	13.5	42	22.75	29.25	11.25	18.5	21
29.75	28.25	15	4.5	21.75	20.25	37.5	18.75	28.5	10.75	20.5	24
36.5	33	10.5	6	22.75	13.75	48.5	26.5	37.75	19	29	21.5
51	28	14.25	6.5	23.75	13.5	52.5	25.25	41.5	16.5	33.75	14.5
27.5	30	9	3.5	16.25	13.5	45	21.25	31	11	29.75	22.75
[truncated: 41,201 more rows]
