# Supplementary material for: Global sleep homeostasis reflects temporally and spatially integrated local cortical neuronal activity
Source: eLife. 2020 Jul 2;9:e54148. doi: 10.7554/eLife.54148 (PMC7332296; doi:10.7554/eLife.54148)
Supplement: Figure 1—source data 1. [file elife-54148-fig1-data1.zip › Figure 1/Firing Rates/Firing-Rate-Mouse-6.csv]

LFP 1	LFP 2	LFP 3	LFP 4	LFP 5	LFP 6	LFP 7	LFP 8	LFP 9	LFP 10	LFP 11	LFP 12	LFP 13	LFP 14	LFP 15	LFP 16
34	7.75	19.25	23.5	7	15.5	2	33.5	34	23.25	9.5	28.25	19.5	18.75	16.25	22
30.25	6.5	17.5	22.25	8.25	12	2.25	26.25	30.25	27.5	7	27.25	17	9	12.5	21
25.25	4.75	17.25	27.25	8	17.5	1.5	39.25	12	7.5	8.75	14	17.5	11.75	14.75	7
24.5	5.5	15.75	22.5	7	8.75	1.25	30.75	23.5	24.5	7.75	23	17.75	8	10.5	14.5
25	5.75	11.75	17.25	4.75	9	1.5	21	32.5	27.5	6.25	30	20.5	10.25	7	21.75
37.25	6	19.5	22	10.25	14.75	1.75	35.25	16.25	12.75	8.75	15	16.75	10	14.75	8
26.75	8.25	13.75	18.25	6	10	2	27	27.25	45.75	6	28.75	15.75	8	10.25	18.5
26	6.5	14.75	23.25	8.75	14	2.5	30.75	29.5	23	7.5	28.75	19.5	12.5	15	22.5
50	12.5	20	27.75	12.75	21.25	3	40	22.5	21	8.5	49.25	21.5	13.25	20	12.75
39.5	9.75	20.75	33.25	13.75	22.5	3.25	44.5	21	26.75	12.25	43.5	29.5	13.75	30.5	15.5
25	6	12.5	20	7	8.75	2.75	21.5	29.75	35.5	9	39	22.5	14	15.25	18.5
22	6	15.5	21.5	9.25	10.5	2.25	24.75	35.5	38.75	9.25	37.75	21.5	15.25	13.25	27
45	7.5	26	28	11.25	21.25	2.5	45.25	30.25	33.75	13.5	43.75	23.5	13.25	23	16.25
29.75	6.5	16.25	21.75	7.5	14.5	2.5	28.5	40.75	34.5	6.75	34.25	33.5	13.5	13.75	25
22	7	14.75	23.5	9	10	2.75	29.75	28	17.5	8.75	16.25	16	7.5	12.25	13.75
32.5	9.5	14.75	20.25	10.75	13.25	3.5	23.5	37.5	36.25	9.25	28	18.25	12.75	14	17.25
34.25	8	21.25	25.75	9.75	13	3.25	31.5	41.5	31.75	7.25	30.5	32.75	15.75	15.75	26
28.75	6.75	18	21.25	5.25	13	1.5	27.25	26.75	35	6	21.25	17.75	8.5	10	19.75
21	4.75	10	17	5	8.25	2	15.25	35	38.25	5.75	26	17	12.5	9	18
22	2.75	16.25	19.5	7.75	12.5	2.5	25.25	33.5	29.25	6.75	26.25	19.5	15.5	12.75	22
36	6	23.75	22	10.5	15.75	2.5	34	28.25	29.75	10.25	27.25	22.5	20	18	17.75
29.25	5	19	24.25	10	13	4.5	35.75	29.5	34.25	9.75	30.5	22.5	15.5	12.5	22.75
27.75	5.25	18.5	21.75	6.25	14.5	3	35.25	21.75	19	9	26.75	19	10.75	10.75	18.5
31.5	6.75	16.75	19.5	8.25	15.75	2.25	31	30.25	30.5	7	20.75	22.5	18.5	14.75	17.25
25	6.25	13.75	21.25	7.5	13.25	1.75	24.25	32	26.25	9	25.5	27.5	10.5	13	24
26.75	6	15.25	17.5	7.75	10.5	2.75	24.25	32.5	27.25	6.25	21.25	16.5	13.5	13.75	24.25
33.5	4.5	21.25	24.75	11	16.5	3.5	40	30.75	24.75	5.5	28.5	22.5	15.5	19	27.5
29.75	7.25	18.5	20.25	11.25	14.5	3.25	31.5	28	29.5	5.25	24.75	17.25	15	15	19
25	6.25	14	17.75	4.75	9	0.75	23.25	37	32.5	10.5	30.25	14	10.75	9.75	18
33.75	6.75	23.25	17.75	7	15.75	2.5	38	15.25	10.5	10	15.75	18.5	10.5	17.5	6.25
28	5	15.75	18.75	5.5	9.5	2.5	22.75	48.25	34.75	7.25	24.5	19.5	14.5	14.25	23.75
28.5	3.25	17.5	18	6	11.75	1.75	28.25	33.75	45.5	6.5	38.25	18.25	12	9.5	18.25
27.25	7.5	14.75	22	8.5	13.25	2.25	31.75	31.25	20.5	6.75	21.75	23	9.75	14.5	18.5
24.25	5	12	25	4	12.75	1.25	29.25	39.25	20	4.75	31	20.5	13.5	12.5	25.25
25	6.25	14	19.5	6.75	8.5	1	25	33.5	33.25	5.75	29.75	21.5	12	10.5	23.75
37.5	6.25	23	26.75	10.75	17	1.25	38.5	28.25	29	9.75	30.25	27.5	16.25	17.5	18.5
22.75	5.25	13.5	20.75	8.75	13	2	26.25	29.75	27.5	8	22.5	17	15.25	12.25	20.25
36.25	7.25	22.25	27.5	10	16.75	3.25	38.5	31.75	27.5	5.75	30.5	25	17.5	17	23.5
28	5.5	18.5	22.5	9.5	18	2.5	30.5	28.25	19.75	9.25	19	18.25	12.5	16	16
39.5	3.75	28.25	27	10.75	21.5	1.5	47.5	16.75	12	9.75	20.5	21	10.5	24.5	10
23.75	5.75	13.75	20.25	7	10.75	1.25	30.5	35.25	29.5	8.25	25.5	21.75	13	12.75	29
24.5	3.75	12	16.75	2.75	6	2.5	24.5	38	46	6.25	26.75	14.75	12	8.5	19
32	4.5	18	21	7.75	12.25	2	29.5	37.5	35.25	5	29.5	20	17.75	14.5	20
39.5	11	16.5	25.5	13.25	21.75	1.75	38.5	27.5	20.25	10.75	34.75	21.5	12.75	18.5	18.25
48	9.25	12.75	26.25	9	21.25	2.75	33.25	14.5	6.5	14	37.5	19.25	7.25	16.5	5
29.75	6	13.25	20.75	7.25	15.25	1.5	25.25	33.75	29	12.5	28	15.25	10.5	12.25	17.5
40.75	6.25	17.75	25.75	8	25.25	0.75	39.5	20.5	21.5	12	25	18	12.25	14.25	15
51.75	11.25	13.5	23.25	13.25	15.5	2.75	33.25	20.25	20.5	11.5	29	17.5	9	10.75	13.75
61.25	13.5	25.75	35	16.75	29	6.5	46	18	23.25	14.5	48.75	25.25	12.75	24	7.5
62.25	9.25	19.75	28.5	19.25	23.25	3.25	40	20.5	28.5	14.75	50	25	12.25	23.75	6.75
47.75	8.75	19.75	18.5	15	18.5	2.5	32.25	15	23.5	10.5	37.75	21.5	8	14	8.75
35	9	14.75	23	15	15.25	4	25	19	24.75	11.5	42.5	24.5	9.75	15.75	7.75
26.5	8.5	11.25	29.5	12	11.5	3.75	19.75	15.25	23.75	11.25	34.75	18.5	6.25	14.5	10.5
31.75	7.75	14.25	21.75	12	16.25	1.75	28	15.75	35.75	10	41	18.5	6.5	17	8
12.75	6.5	4.75	23.25	5.5	14.5	3.5	16.25	21.75	20.5	6.75	29.75	18.25	3	7.75	11
13.75	5.5	9.75	17.5	8	10.5	4	20.75	17.5	10.75	5.5	30.75	15	4.75	11.75	13.25
31.25	6.5	22.5	27.5	20.25	17.75	6.5	32	20	30.5	8	42.5	27	10.75	15.75	12
7.75	6	5	19.5	6	10	2.25	8	13.75	16.5	7.5	33.5	13.75	6.5	9.5	7.75
17.75	4.5	6.5	27.25	7	6.5	2	15.25	14.25	20.5	6.25	30.25	12.25	7.25	6.5	8.5
28	8	14.75	21	15.25	15.25	3.75	24.75	17.5	31.25	10	33.75	20	12	20	7.75
20.5	6.5	9.75	20.75	8.25	9	1.5	20.25	21.75	26.75	6.5	36	17.75	5.75	11.75	8
12.25	7	3	22.5	5.5	10	1.75	9.25	18.5	25	5.25	31.75	13.25	6	9	7.25
15.5	6	3.25	25	5	7.5	1.25	11.75	11	12.5	6.75	30	15.25	2.75	9.75	6.5
13.5	11.5	3.75	19	8	10	2.25	9	17.5	6.5	6	24.25	12	3.5	6.25	4.25
18	8.25	4.5	25.5	9.25	10.25	3.25	9	16.75	9.75	4.25	25.75	17.5	3.25	9.75	8
7.25	8.75	4.25	29.5	11	18.5	3	8	28.75	14.75	4.25	20.75	17	8.25	9.75	8
10	6.5	4.5	29.75	12.25	7.75	2	9.5	22.25	14.75	8.25	32	12	11.75	7.75	11.25
12.75	6	7.75	24.75	8.5	10.25	2.5	9.75	25.75	17.5	5.25	27.75	10.5	5.75	8	8
12.75	9	5.75	25	12	5.5	3	13.5	16.25	20	7	37	14.75	8.75	10.75	11
10	4.5	4.5	25.5	12.5	9.75	2.75	11	19.25	19.5	4	34.25	20.75	7.5	11.5	9.25
7.5	5.25	6.25	25.25	22.5	8	1.75	15.75	19.25	19.25	6.5	34.25	23.5	6	6	14
17.25	7.75	7.75	26.75	10	16	3.25	16	23.75	40.5	9.5	32	21.75	8.75	12.75	14.25
6.75	6.25	6	23	16	7.25	0.75	9.25	17.75	20.25	3.5	27.75	20.5	3.5	7.5	14.25
9	5	7.5	19.25	18	9.25	3	18.5	17.25	16	9	21	20	5.75	11.75	10.25
17.25	6.25	8.75	32.25	17.75	9.75	5	16.5	17.25	21	4.75	29.25	19.5	5.75	9	12
33.25	8.5	4.25	26.75	3.25	11.75	1.75	17	12	18.5	4	26.5	12	2.75	7.75	9.25
25.75	8.75	6	27.75	5.75	9.5	4	19.5	14.5	23	6	29	14	3.75	8.5	7
25.5	10	6.5	35.25	6.25	11	2.75	14.25	16	10	9.75	24.25	15	5.75	16	7.25
21.5	8	4.75	34	6	10.75	2.75	14	15.25	13	10.5	18.25	14.5	5.75	11.75	4.5
16.5	7	5.75	28.75	6.75	11.25	4	19.25	15.75	14.5	8.25	25.25	12.75	3.75	11	7.75
11.5	10	3.5	20.25	4.75	9.75	3	19	23.5	32	9.5	32.25	11.75	3	12.75	6.75
21.5	5.25	3.25	31	5.25	11.25	2.75	22.75	13.75	20.75	6.25	24.75	16.75	3.5	9.5	4.75
26.5	6.75	20.25	37.25	8.25	12.5	2.25	47.25	13	21	10.75	26	30.5	5	25.25	6.5
25	12.25	21	19	8	16	2.25	35.75	12.5	21	6.75	25.75	27	4.5	32.75	6.5
25.5	8.5	5.25	20.25	8.25	13	2.25	16.25	14.75	22.5	9.25	28.5	12.75	2.25	12.5	6.75
29	7.5	5.25	29.5	8	14	2.5	17.75	16.25	11.5	9.25	29.25	18.25	2	10.75	9.5
14.25	13.25	6.25	21.75	6.25	11	3.25	21	15	17	10.75	24.75	16	4.5	11.75	4
14.25	14	6	23.75	8.5	12.25	5.75	23.5	14.25	35.25	11	27.75	13.75	1.75	11	6.25
12.25	4.5	6.25	19.75	6.25	13.5	2.25	14.25	14.75	25.25	5.75	28	15	3.25	7.5	7.25
24.5	6.5	6.75	30.5	4.75	8.75	2.75	17	15.25	16.5	6.75	21.5	17.75	2.5	5.5	8.75
14.25	2.75	6	31.25	6.25	13.5	2	17.5	21.5	20.25	6.5	33.25	23.25	8.75	5.5	11
28.75	6.25	3.5	24	10	11.75	2.5	14	15.25	10.5	4.75	22.5	13	2	11.25	5.5
30.5	6.75	3	19.5	5	15.25	3.25	19.5	14.25	6.25	7	22	12.25	2.5	8.5	8
18.5	6.75	7	16.75	5	11.25	1.5	11.75	17	21.5	8.5	28.5	17	3.75	7.5	7.5
21.75	6.25	5.25	17.25	4.5	11.25	1.5	13	14	14	7.75	27.5	16.25	3.5	7.25	9.5
20.5	10.75	9.5	22.5	3.75	7.75	4	13.5	16.5	27	11	29	15.75	4.25	12.75	7.75
13.25	4.25	6.5	23	7.75	8.5	3.25	19.25	13.25	22.75	7.75	24.5	14.5	3.5	13.25	5.5
14.75	5.5	5.25	25.25	10.25	6.25	2.75	16	18.25	21.5	6.25	30.25	17.5	8	6.75	8.75
14	8.75	7.75	26.75	6.75	10	5.25	14	15.25	16	7.25	30	18.5	4.75	5.25	8.25
22	6.75	21.5	14	4.75	10.5	1	16.75	21.5	18.5	8	32.5	13.75	8	9.25	11.75
15.25	8.75	11.25	21.5	8	7.5	3.25	16.75	20	21.5	5.75	30.25	19.5	5.5	11.25	13.5
13.75	9	6.5	27.75	6	11	2.75	11.25	27.25	37	7.25	28.5	21.25	5.75	9.25	12
15	4.75	8.25	22.75	8	10.75	1.75	14.75	21.5	36.5	8.5	31	21.25	6.5	8	16.25
24.5	7	9.25	26.75	7.5	9.75	3	14.75	14.75	32.75	8.25	29	15.75	6.25	9	11.75
13.25	7.5	12.75	22.5	11	16.75	4.5	13.25	13	28.25	8	20.75	17.25	9.5	10.5	11
14.75	8.5	5.25	23.5	7.5	13.25	4.5	8.25	15.25	14	7	21	16.75	3	9	10.75
21.25	7.75	6.5	35	7	9.25	5	13.5	16.75	15.25	6.5	21.5	13.5	4	10.5	7
17.75	7.5	8	27.5	4.25	11.25	2.75	10.5	20	23.5	6.25	30.75	17.5	7.5	8.75	11.5
12.75	8.5	13.75	26	6.5	10.25	4.5	11	22.75	35.75	10.25	23.75	23.75	8.25	10.5	10.75
13.25	9.5	13.5	31.25	11	7.25	3.5	13.25	16.5	45	11.75	29.75	15.25	12.25	11.75	11.25
13.75	9.75	5.75	28.25	11.5	8.5	4.25	13.5	22	40.25	8.75	32	16	6	11.5	10.25
9.75	7	12.25	24.25	8.75	11	3.25	12.75	22.75	44.25	6	27	17.75	7	8	11.25
7	7.25	4	26	4	6.5	1.75	11.5	20.5	17.5	10.75	17.75	19.25	4.25	9.75	11.5
14.25	5.75	2.75	31.25	5	8.75	2.75	10.25	18.25	10.25	6.75	22.25	16	4	5.75	7.75
14.75	7	9.75	31.5	8.25	14.25	3.75	21	21	24.5	8.5	29.5	23.5	11.5	8	11
13.75	11.25	13.25	25.75	9.5	7.75	1.5	17	22.25	56.25	10.25	23.75	18.75	11.75	12.5	17
15	11	9	27	7.25	11.5	3.25	22.25	24.75	66	7.25	37.5	22	10	17.25	13
13	9	3.25	29	11.25	8.5	2.75	18.5	17.25	28	9.25	22.75	17	3.5	9.25	12
18	8.5	11.75	23.25	8.5	11.25	2	19.5	22.5	37.5	14	30.5	24.75	8.75	8.75	12
19.25	8.25	14.75	24	8.25	13.5	2.25	30	29.5	40.75	6.75	27.75	28.25	11.25	13.75	16.75
15.25	6.5	10.25	23	6	10.5	3.25	15.75	17.75	35.75	6.25	26.25	18.5	5	7	5.5
25.25	7.25	11.75	24.5	9.75	10	3.25	18.75	21.75	21.5	8.5	32.75	17.75	4.75	15.75	7
23.25	10.5	9	25.5	10	11	3.25	19.75	20	23.5	10.25	30	20	5	11.5	8.75
14	10.25	8.5	24.25	6.25	6	4.25	15.75	24	46.25	8	36.75	24.5	5.25	8.5	13.5
16.75	11.25	8.5	18.75	7.75	6.5	5.75	18.75	28	38	9	28	27	9.5	10	17
17	7.75	8	30	6.5	7	3.5	16.5	21.5	23.75	5.25	32	16.5	4.75	8	13
15.5	6.75	5.75	26.75	5	10.75	3.25	18.25	22.25	25.25	10.5	30	16.5	5	10.5	13.25
24	11.75	6.25	21.25	8	9.75	2.25	18.75	21.25	38.75	7	30	15.5	5.5	8.5	9.25
18	8.5	4.25	26.25	5	11.25	3	14.25	14.75	18.5	5	27.75	17.25	3.5	4.75	7.75
13.75	10	9.25	20	4.5	10.5	1.75	13	18.5	22.25	9	29.75	19.5	2.5	10.5	5
8.25	6.5	6.25	27	13	11.5	3	13	32	20.25	6.5	32.5	19.5	15.75	17	15.75
16.25	9.25	5	37.25	14	13	4.25	11.25	23.5	15	5.5	26.75	16	4.75	13.5	11
12	9.75	5.25	31	10.5	11.25	2.5	12.25	26.25	19.5	3.75	29	14.5	5.75	10.25	11.75
14.25	9	8	30	10.5	11	4.25	10.5	28.75	16.25	5.5	29.25	17.5	5.5	8	14.25
9.75	6.75	5.25	34.75	8.75	12.5	3	11.5	18.5	19.25	3.75	23	14.25	6.75	10.25	11.5
17.75	8.75	4.25	34.5	16.5	7.5	2.75	13	23.75	14.25	5	32.75	14.25	6.5	8.75	7.75
18	7	10.75	35.75	11.5	9	2.75	17	24.25	32.25	10.5	35.5	18	8	10.5	14.5
16.75	7	7.25	34.5	8.25	7	4	15	26.75	17.5	8.25	32.5	15.5	8.5	10.5	11.5
15.75	10.75	7	25	9.5	13	4.25	15.75	24.25	18.25	8	29.25	14.5	4.5	10	8.5
23.25	8	5.5	40.25	16	14	3.5	14.75	22.5	18.75	7	29.75	17.25	4.5	11.5	9
15.25	11.75	6	33	8.5	6	1.75	14.75	19.25	24	7.75	24.5	15.75	5.75	7.25	8.25
13.5	7.5	4.5	30.5	7.75	5.5	2.75	12.75	16	23.5	5.75	30.25	14	10.5	11	10.75
20.75	8.75	7.5	27.75	9	5.5	2	15.25	24.25	22.25	8.25	30	15.25	8.75	10.25	8
15.5	8.25	5.25	30.75	6.5	6.5	2.5	14.75	20.75	23.25	6	24.75	14	7.25	6	7.75
18.75	10.75	2	27.75	8.25	9.25	3.25	17.75	19.5	18.5	9.75	29.25	13.25	3.25	15.5	6.5
18.5	6.5	5.5	29.75	5.5	6.25	3.25	16.5	22.75	18	6.5	27.25	11.75	8.5	9.5	10.5
22	10	4.5	30.5	6.75	7.75	2	20.5	26.5	18.5	8.25	33	17.5	5.25	9.75	10
15.75	5.5	5.25	33.75	13	13	2.25	17	24.75	26.5	9.75	39	21.75	8.75	11.25	13.25
14	7.75	6.5	36.25	14.25	16.5	2.5	17.25	24.5	30.75	9.5	33.25	21.75	7.5	7.75	12
16.5	5.25	9.75	26.75	21.5	11.25	4	13.25	21.5	17.75	6.25	35.5	25	7.75	8.5	12.5
12	6.25	7.5	29.5	15.75	8.25	3	12.5	18.75	20.25	5	30	29	6.5	11	18.75
9.5	6	9.25	30.75	16.75	10.75	1.75	13	23	20.25	8.75	33.5	32.25	8	11.5	20.5
10.75	8	9.75	25.25	7.75	11.25	2.25	14	23.5	45.75	8.5	25.5	24.5	7.5	11	17.5
10	6	7.25	28	21.25	9.75	2.25	12.25	23	25.25	6.75	26	29.5	7.5	13	17.25
11	5.25	9	28.75	18.75	8	3.5	14.25	21.25	22	7.25	30.25	26	5.25	12.75	13.25
13	8.25	5.5	27.75	14.25	7.5	2.25	17.5	15	16.5	5.25	30.75	18.5	5.5	8.25	7.75
14.75	4.5	3	30	14.25	9	1.75	12	19	16.5	11.75	30.5	19.25	5.75	11.25	11.75
11.75	5.25	7.25	29.25	15	12	1	13	23	23.25	7.25	31.25	23.75	4.75	11.75	15.5
14.25	6.5	4.5	27.25	14.25	13.25	3.75	8.5	21.75	13.5	8.25	33	18.25	4	13.5	9
10.75	4.75	6	19.5	14.5	6	3.25	10.25	18.25	13	7	31.5	22	4.5	9	14.5
9.75	6.5	6.75	22.75	16.5	12	3	17	19.25	23.25	8.5	34	22.75	7.75	13.25	15.75
21.75	4.75	4.75	23	11.25	8	2.25	11.75	25.5	26.25	10	30	24.25	7.5	12.5	16.25
15.75	7.25	6.5	20.5	19.75	12.75	2.75	13	29	23.25	7.5	32.75	26.25	6.25	12.5	17.25
18.5	9.25	6.25	23	16.25	8	3	14	21.75	16.25	10.25	31.25	17.25	7.75	12.75	13.75
14	8.25	5	19.5	15.5	9.75	2.5	12	23.5	27	10.5	30.25	26.75	9.25	13.25	13.25
15.25	11.5	8	21.25	12	10.75	2.75	14.75	23	31.75	6.25	36	19.75	6.25	10.75	9.75
14.5	8.5	8.25	22.5	9.75	7.75	2.5	18.5	16.25	33	5.75	29.75	18.5	5.75	12.25	9.5
17.5	5.75	5.75	25.25	12.5	18.25	1.75	12	26.75	34.25	9.25	39.25	22.75	8	12.25	11.5
14.75	4.25	5.75	25.25	9.25	10	1.75	13.25	18.75	29.5	8	35	20.25	3.75	11.5	15
15.75	5.75	9.75	28.5	6.25	13.75	4.5	16.25	29.5	56	11	32.5	23	10.25	13.5	16
13.5	5.25	7	25	5.5	9	3.5	15.5	22.5	32	6.75	29.25	20	4	11.25	8.25
18.75	8.5	12.75	23.25	5.25	8.25	2	16.5	17.75	44	10.5	26.25	22	7	11.75	9
27.5	9	2.25	30.25	13.75	18.75	2.5	15	12.5	5	5.5	18	15.5	5.25	8	7.25
23.75	7.75	8.25	18	5.25	11.5	3.5	12.5	21.25	40.5	7.25	19.75	23.5	5.25	10	10.75
17.25	3.5	10.75	25.25	6.75	8.75	5	22	30.5	48.75	9.25	41.75	27.25	26	7	23.25
9	5.75	4.5	15.5	4.5	5.75	3.25	16.5	20.75	40.5	7.75	27.25	15.5	29.5	8	20.5
6.25	7.25	6.25	21.75	4.75	8.25	2	19	27.5	42.25	9.5	30.25	17.5	22.75	4.5	21.5
18.75	7	9	23.25	9.5	10.25	2.5	26.75	24.5	37.25	6.25	42	20.5	10.25	13.25	7.75
14	8.75	7	23.75	5.75	10.75	3	19.25	21	38	7	39.75	18.25	10.25	12.75	13.25
18.5	5.5	4.75	16.5	4.75	8.5	2.25	17	15.25	18.25	11.5	37	17.75	4.5	18.5	7.5
21.75	8.75	8	31	5.75	7.5	3.75	22.5	23.25	28.5	8.75	32.75	22.5	5.5	11	12.25
19	5.75	8.25	27	4.5	6.25	3.25	17	14.75	17.5	2.25	29.25	20.75	4.75	5	10
21.25	9	6.5	21	4.75	10	2.75	24.25	17	26	8.25	34.25	19.25	5.25	9	6
18.75	6	10.5	17.75	9.25	12	3	26.75	27.25	55	9.5	32.5	22.75	11.25	14.25	14.75
20.5	5	5.5	19.75	4.25	6.75	2.75	17.25	18.5	24.25	8	31.25	15.5	5.5	4.75	8.5
21.5	6.25	5.5	20.5	3.75	10	3.25	25.5	26.25	30.75	9	21	15.75	7	6.75	12.5
14.5	5.75	9.75	21.25	6.75	6.75	2.75	23.25	20	31.5	6.75	15.75	14.25	6.5	3.75	13
14	7	4.5	27	4.25	8	1.25	18.75	23	35.75	5.75	14.5	17.25	7	4	11
18.25	7.5	5	22	4.25	9.5	2.25	19.75	20.5	48	7.25	17.25	19.75	6.75	6.75	13.25
16	6.5	8.75	29.25	6.5	7.75	1.75	21	20	20.5	8.25	43.75	28	6.75	12.25	18.5
15.25	5	5.75	20.5	7.75	10.25	1.75	16.5	31	25.25	7.25	44.25	22.25	25.5	9.25	26
11.75	4.75	9	25.75	12.75	8.25	2.5	20.25	21.5	18.75	4.75	32.5	25.75	14.75	6.5	17
8.25	9.25	6.5	27.25	9.25	10.75	2.5	16.75	22.25	19	7.5	36.5	23.75	7	10	10
17.25	8.5	8.75	25.75	6	10.5	3.5	16.5	24.5	33.25	11.5	27.75	20.25	5.5	11.25	12
17.5	7.75	9.25	16.75	3	6	1.75	21.25	25.25	35.25	8.5	35	22	6.5	10.5	17.75
19	4.5	10.25	17.5	4	9	3.75	25.75	27	37	8.5	27.75	22.5	11.75	7.75	19.5
9	4.75	5.25	14.75	9	6	2.5	20.5	34.5	20.5	8.5	17.5	22.5	18.25	4.25	20.75
16.75	6.5	8	14.75	4.5	7	3	27.25	27	23	6	18.75	22.5	12.25	7.75	21
12.25	5.25	8.25	15.75	4.25	9	2.5	23.25	35	17.75	9.25	22.5	22	10.25	6.25	18.5
13.5	5.75	9	17.5	6	10	2.25	23	28	24	6.75	14.5	19.5	15	11	15.25
12	5	7	17.5	5.5	6	1.75	25.25	37	29.25	9.75	13.25	19.25	10.75	10.75	23.5
13	4.25	4.25	14	6.5	6.75	1.5	18.75	35.25	26.25	11	22.5	19.25	9.25	7.25	19.25
16.5	7.25	10.25	18.75	6	7.75	1.75	21.75	32.5	34.25	8	28.5	21.75	8.25	7.75	18
40	8.5	28.75	29	17	21	4.25	47.75	26.5	31.5	12.75	36	28.75	24.5	25.75	18.75
17	5	11.5	21.25	6.75	13	1.25	27.25	22.25	28.5	8.25	20	19.25	12.75	13.75	14.75
14.75	5.25	16.25	17.75	11.75	9.75	3.5	27.75	32	27.25	8	27.75	21.75	12	14.5	16.25
18.75	6.75	12.5	19.5	11.25	10	3.75	24.5	26.75	26.25	11.25	23	17	11	12.25	12.75
29	8.75	17.25	20.5	14	13.75	2.25	36.75	21.25	21.75	13.25	29	22	14.25	17	16.5
12	8.5	8	21	5.25	10	3	24	33	35.25	7.25	41.25	25.5	17.25	7.25	24.5
16.75	8	12.5	16.75	8	11.75	1.75	24.25	29.75	21	15	24.25	23.25	14.75	9.25	21.75
5.25	5.5	4.25	15.5	2.5	6.25	2	17.75	19.75	16.5	9	20.5	20.25	8.5	4	15.25
37.5	5.75	21.75	33.75	11	20	6.75	34	33	28	18.5	28.5	28.75	14.25	18.75	18
17.5	7.5	5.5	23.5	3.75	8.75	3.75	16	23	24	8.75	12.75	19.5	7	4.5	12.25
32.25	9	8	25.5	8.25	9.25	1.75	15	25.5	23.75	8	25.25	18	5	6.25	13.5
35.5	10	24.75	33	14.75	23.25	5	43.5	29	39	12.25	35.75	29.25	15.25	22.25	16.25
14	4.75	5.5	14.75	3.75	7.5	1.25	18.25	18.5	10.25	6.5	16.25	15.75	6.25	5.75	10.5
9.75	9	5.75	23.75	5.75	7.75	3	21.25	25.25	30.5	8.75	12.5	18.75	5	4	18
61.25	10	40.5	39	25.75	33.25	9.25	57	24.75	53.5	15	46.75	40.75	21.5	38.5	19.75
18	6.75	11	16	4.75	8	1.25	24.75	19.75	26	9.5	32.25	18.75	9	7	14.5
31.25	8.25	21.5	32.5	15.75	18.25	5.5	35.25	34	40.5	10.75	42.75	30	18.5	23.5	19.25
13.75	4.75	10.75	18	6.5	9	3	23.25	30	30.5	13.25	27	13.5	8.25	11	18.5
17.75	5.75	12.5	22.25	9	14.5	1.75	29.75	25.75	32.75	11	34.25	18.25	16.25	13.75	16.25
17.5	4.75	11.25	19.75	6	10.75	3	27.5	20.25	14	7.5	24.5	21.25	12.75	10	11.25
21.75	7.25	15.25	24	7.5	12.75	2.75	28.25	23.5	22.25	8	28.5	21.5	15	11.75	13.5
24	6.75	10.25	26.5	6	8.5	5	23	22.25	27	11.25	24.5	18.25	13.75	9.75	15
17	5.25	2.25	20.75	2.5	4.75	3.25	17.25	21.75	40.75	9	13.75	12.5	10.5	4.25	12.5
8.25	3.75	4.25	20.5	1.75	6.25	2.25	20.25	27.75	49.5	7.25	21	12.25	23	3.75	17
15.75	8	6.75	23	5.25	7.75	4.25	18	31.5	57	7.75	32.25	19.25	31.5	7.5	21.75
10.75	3.25	4	16.5	4	6.25	3.25	19.75	31.25	43.75	7	23	16.5	12	3	15.5
8	3.75	3.75	16.75	3.25	8.25	2.75	16	26.5	34.25	6.5	19.75	12.75	9.75	3.25	18.25
6.5	4.75	4.25	16.5	3	5.25	3	17.75	25.5	37	7	22.5	17.5	11.5	6.75	18.75
10.25	5	2.5	12.5	1.25	7	1	15.5	23	34.25	7	16	13	12	3.75	16.5
6	4	3.5	13.75	2.25	4.25	1.5	16.5	29.5	36.75	12.25	25.75	16.5	6.5	5.25	20.25
10.5	5	5.5	19.25	4.5	8.25	4.75	12.5	32.5	50	11.25	28.75	17	9.75	8.25	17
11.75	5	4.5	27.25	2.5	7.5	2.25	18	23	39.5	9.5	19	17	6	6.25	15.25
8.75	7	6.75	27.25	6.25	9.25	1.75	19.25	25.75	38.75	10.75	31	24.5	6.75	4.5	20
22.75	2.25	6.25	19.25	6	8.25	2	18.25	20.5	31.25	8.25	26.5	16.5	9.5	6.5	10.75
13.75	6	7.75	20	7.25	8.25	3.5	25.75	21.25	26.75	8	23.25	21.5	5.5	7.25	12.75
23.5	9.5	7.25	32.75	11.5	12.5	4.5	19	23.25	24	11.75	35.75	20.5	3.5	14	13
18.25	8	8.5	27.75	13.5	7.25	2.25	12.75	16	35.75	8	25.75	13	3.25	6.75	8.5
19.75	8.75	7	30.5	11	5.5	4.75	19.5	27	40	8.5	35.5	23	5.5	7.25	13.5
16	9.5	11.5	23	10	8	3.25	25.75	26.75	60	18.25	37.75	22.75	9	9	19.25
17	5.5	5.25	25.75	4.5	7	3.25	17	18.5	26.25	5	35	22.25	3.75	8	11.75
13.25	5.75	6.25	26.75	6.25	6.5	3.25	13.75	25	25.25	8	34	20.5	4.75	8.75	13
17.5	8.5	6.5	33.5	6	12	2.25	18	26	38.25	6.5	36.25	15.25	6	9.5	11.25
19.75	6.75	4.75	28.75	4.5	7.75	2.25	17.25	19.5	27.75	8.5	27.5	14.75	2.5	13.75	9.5
21	6	4.25	27.5	6.25	14.75	3.75	15.5	17	13.75	8.5	28.75	19.25	4.5	12.25	9.25
21	6	7	27	4.25	15.25	4.25	20	24.5	17.25	6	27.25	16.25	3.25	11.75	7.75
12.75	6.5	7.75	20	10	13.75	2.25	14.25	33	26.5	8	43.25	19	10	15.5	14.75
14.25	6.75	5.5	28.75	10	12.5	3.75	14.5	23	19.25	7	31.25	16.5	5.25	6.5	10.75
18	10	12.5	32.5	9	11.75	3.25	18.25	34	55	13.75	44.5	25	7.5	11	15
15.25	5.25	6.5	22.5	8	12.75	5.25	22.5	28.5	32.75	6.75	30.5	18.75	5.5	11	10.75
15.75	7.5	5.75	26.25	3.5	11	2.75	17	23.5	14.25	8	27.75	22.75	7	14.25	10.25
10.5	7.5	4.75	25.25	8.5	10.25	3.25	18.25	28	25.75	5.75	26	21.25	5.75	10.75	11.5
17.75	5.75	7.5	25.25	9	10.25	6	14.75	25.75	17.25	8.25	32.5	16	6.5	9.25	8.75
22	9.75	13.75	26.75	11	19.75	5.75	35	32.25	60.5	14.25	38.5	24.75	16.75	16.75	12.75
14.75	7.25	6	31.25	9	8.5	4.5	17.75	30.5	35.75	9.5	30.25	19.75	7.75	12.25	11.75
15.75	10.5	8.25	31	6	10.25	3.5	20	28	44.5	13	31.75	19	6.75	10.75	12
15.5	6.5	10.25	34.75	7.5	8.75	7.5	23.75	30.25	43.5	11	32.75	22	8.75	13	10.5
15.5	8.5	7.25	27.5	9.75	10.25	6.25	18	33.75	25.75	8.25	28.75	24.5	9.25	6.5	17.75
11.5	5.75	5.75	28.5	7.5	8.25	1.25	12.5	23	17.5	5.75	25.75	13.75	5.25	7.75	8.5
14.5	8.5	5.25	24.75	7.5	11.75	4.5	16	32.75	26.75	6.5	31.25	21.5	6.75	10.25	12.25
18.25	6.5	6.75	23	13	6.5	3.5	12.5	23.5	22.75	5.75	29	17	5.75	10.75	11.5
11.25	7.5	4.5	21.25	10.5	13.25	3	13	30.75	24	7.75	38.5	20.5	5.75	11	11.25
12.25	5.5	7.75	30.75	10.75	8.25	2.75	15.25	29.5	16.75	6	32.75	21.75	6	9.5	11.5
9	5.75	5.75	34	14	7.5	2.5	15.75	23	18.25	5.25	28.5	20.75	6	10.25	10.25
11.5	6.5	7.25	23.5	10	8.25	1.5	14	25	17.75	7.25	27.25	21.75	7	9.25	13.5
20.75	6	4.5	25.5	12.5	13.5	3.25	15.5	25.25	20.25	7	31	17.25	7	8.25	12.5
12	5.25	7.75	28	11.25	10	1.5	14.25	26.75	33	8.75	26.25	25.5	5	13.75	12.25
9.25	8.75	6	33.5	13.5	9	3.25	14	19.5	14.5	6.5	33.75	22.75	4.25	9.5	19.5
12	6.5	5	31.5	12.5	6.75	4.25	13.25	21	17.75	6	29.75	17.75	7	11.25	12.25
22.5	6	7	25.25	9.5	12	4.75	16	23.5	30.25	9.5	26.75	20	5.75	10.25	9.25
32.25	7.5	5.75	23.25	7	12.5	2.5	18.25	15.25	16	6.25	26.5	15	5	11	9
27.25	10.75	4.25	30.5	7.25	10.75	2.75	19.5	18.5	20.5	7.25	32.75	19	3.5	12.25	7
13.5	7.5	5	23.75	7.5	6.5	3	20.5	19.5	17.75	7.5	35.25	14.25	4	13	8.25
15	5.25	11.25	24.25	7.75	7.5	2.25	24.75	31.5	33.75	10	48.75	30.5	17	10.25	20.75
18.75	4	20.25	14	7.5	10	4	33.25	24.5	30.75	5.5	47	27.75	12.75	14.25	16
10.75	5.75	8.5	23.25	4.75	11	2.25	25.75	19	15	8.25	25.5	16.5	8.25	6.5	12.25
6	8	3.5	16.5	5	7.5	2.5	22	17.75	9	9.75	11	17	7.5	4	6.5
14.5	7	11	20.5	8	11.5	3.25	30.75	17.25	19.75	5.75	13.75	24	9	12.25	8.75
47	8.5	33.25	32.75	19.5	31.75	7.5	52	27.5	29.75	13.5	47.25	38	21.5	35.75	16.25
41.5	6.5	27	32.75	17	25.25	3.75	46.5	32.5	30.75	9.5	51	38.25	19	24	16.75
33.25	11.5	29	30	15.75	26	4.25	48.75	22.75	21.25	11	41	28.75	14.25	25	13.5
31	10.75	18.25	27.5	14.5	18.75	4	34.75	24.5	42.75	15.5	43.25	33.25	14.75	22.25	22.25
28.25	7	18.25	24.75	14.5	23.75	5.25	37.75	31.5	37	11.75	42.75	32.25	19	25	28
14.75	5.5	5.75	22.25	3.25	8.5	3.25	21.75	24.25	24.75	8.25	30.25	21.75	10.25	10.25	15.25
21	7.5	7.5	18.75	4.5	9.75	3.25	23.25	23.5	20.5	6.25	32.75	22.5	7.75	9.25	12.25
24.5	7.25	8	30.25	7.75	11.25	4.5	21.75	21.75	21.25	9.25	30.5	18	5	11.5	9.75
8	5.5	5.75	33.5	18	5.75	3	10	25.5	15.75	6.75	30.75	30.25	8.75	10	17.75
9.75	8	6.25	29.25	11	7.25	3.75	9.5	28.25	31.25	7.25	33.25	26	8.75	9	17.25
15.5	8.25	7	19	9	13.75	2.25	12	29.75	38	11.75	33.5	25	7.25	10	13.5
14.75	8	7.5	20.75	6.25	7	3.75	13.75	24.5	27.5	7.75	38.5	20.75	7	11.75	12
18.25	5.75	4.75	27.25	9.75	7.25	2.75	12.25	16.25	15.25	6.25	27.25	13.25	5	9.75	8.5
9	8.25	6.25	29	16.75	10.75	1.5	13.25	23.75	15	6.5	37.25	28.75	7.75	11.5	13
10.5	7.5	4.25	30.5	11.75	7.5	2.5	12.5	24.25	12.75	5	29.25	23.75	6	10	12
20.75	5	3.75	25	7.5	7.25	3	14	16.5	30.25	6.25	38.25	16.5	5.75	11.5	11.5
23	8.25	5	30.25	6.5	11.5	3.75	19.75	14.5	23	3.75	32.25	14	6	8	12
15.5	10	5.25	24	5	7.25	3.75	20	20.75	21	10.5	31.5	20.75	5.25	10.75	8.5
25	10.25	18.5	33.5	7.75	13	4	29	27.75	62	10.5	57	25.25	10.75	23.75	16.25
18	8.75	6.75	20.25	4.5	11	2.75	20.75	24.75	27.25	8.25	27.25	19.5	8.5	12.5	10.75
18.75	5	5.5	26	6.75	7	2.75	13.5	23.5	22.75	9.5	31.25	20	6	9.5	9.25
17	7.5	7.75	21.5	6.5	8.75	3	11.5	20.75	27	7.75	32.5	15.25	4.5	9.75	7.25
21.25	5.25	10.25	26.5	7.5	9.75	3.5	18.5	15.25	51.25	9.5	41.75	17.5	4.5	13.5	9.75
26	7.25	5.25	21	8.75	8.75	3.5	23.5	23.5	27.25	10.25	33.75	20	8	15.5	9
20.25	7.5	10	27.25	9	20.25	4	28.25	24.25	52	10.75	38.25	24.75	10.5	15.75	11.5
15.25	8	9.75	27.25	10.5	24.75	3.75	26.5	31.75	51.5	15.25	39.25	27.75	9.25	17.75	20.25
25.75	10.25	17.5	28.25	7.75	23.75	5	38.5	29.25	59.5	12	36.75	22	14.5	16	19.25
13.25	10.5	6	25.25	8.5	12.75	5.25	26.25	36.75	43.5	6.25	26.25	25.75	14.75	10.75	14.5
13.25	7.25	5	33.25	7	10	5	19.75	24.75	23.25	6.75	33	17.75	7.75	10.25	10.75
9.5	6	6.25	19.25	7.25	6.5	3.5	16.5	24.25	23.25	5.5	35.75	25.5	9	8.75	19
11	7.75	5.25	20.5	9.5	7.25	4.25	16.75	22.25	20.5	6.75	34.5	28.25	10.75	9.75	19.75
7.25	5.5	5.5	20.5	11.75	6.75	1.5	11.75	21.25	17.75	3.25	30.25	24.75	7	10	13
12	5	7.25	20.75	8.25	9.25	2.75	20.75	32.5	33.75	10.5	37.75	24.5	11.5	9.25	21.5
11	4.75	6.25	19	3.75	8.25	4	21.75	29.75	26.25	9.75	37.75	17.75	16	5.75	14.75
9.75	5.25	6	13.75	5.75	8.75	2.25	16.75	23.5	31.75	10.75	47.25	18.5	14.25	5.5	21.5
9.75	6.75	9	15.25	4	6.25	0.25	18.75	23.5	42.75	8.75	25.5	15	10.25	5	13.5
16.5	7.25	5.5	12	6	5	3	17.75	17.25	28.25	8.25	17.75	16	8	4.25	11.25
15	4	6.5	18	7.75	7.5	1.75	19.25	29.75	33.25	8	27.75	23.5	13	7.75	21.25
16.5	5.5	10	14.25	4.5	6	3.5	21.5	24.25	37.25	6.75	20.5	24	9.5	8.75	22
16.75	5.75	12.75	18.25	6.25	9.25	1.75	27.25	30.25	47.25	6.5	28	24.25	12.25	7.5	26.5
11.5	6.75	10.75	12.5	6.75	10	3	17.25	30.5	38.75	7.5	21	24.75	8.5	8	22.25
13.75	6	10.5	21.75	7.5	9.25	2.5	27	26.5	35.5	11	26	26	13.25	10.75	21.25
8.25	9	9	14	7.5	11.5	4.5	19.5	35.5	49.75	13.5	29	27	16.75	5	30.5
12.25	6.75	11	15	1.75	9.5	4	23	25	33	9.5	22	23.25	9	8	20.75
17.5	6	15.75	20	7.5	9	3.5	23.25	26.75	25.75	10.25	21.75	22.75	8.5	10.5	16.75
16.5	8.75	12.5	17.25	6.5	10.25	3	22	29.75	41.75	11.25	22.75	25	9	11.25	20.5
21.75	8.25	8.75	18.25	6	10.25	6.5	20.25	26.25	49.75	13	27.25	23.5	9.5	8.25	23.25
39.75	11.25	7.75	33	6.5	14	2.25	27.5	22.75	51	8.25	30	21.5	7.5	11.25	10.5
23.75	9.5	9.25	25.25	10	15.5	4.75	21	22.25	37	8.25	42.5	27.25	5	13.5	8.75
21.75	10.25	6.75	30	11.75	9.75	3	15	22	16.5	9	38.75	21	5	13.75	11.5
9.75	6	3	32.5	15.75	6.25	2.75	11.5	23.25	16.75	6	33.75	31	6.75	8.5	10.25
8.25	5.75	6.75	23.5	17	10.5	1	11.5	24.25	26.25	9.25	34.75	26.75	6.25	10.25	13.25
8.25	4.75	7.25	21.75	20.5	8.25	2.25	10.75	27.25	22.5	6.75	37.25	27	10	13.75	20.75
23.5	5.25	17.5	18.25	11.25	14.5	3.75	31	38.25	42.25	12.25	25.75	24.25	11.75	14.75	26.75
23	6.75	15.25	21.75	9.5	14.25	2.25	34.5	33.5	40.75	10	31.5	25.75	14.25	13.75	22.5
17	6	15.75	18.5	9.5	12	2.75	26.25	30.25	38.25	11.5	21.75	26	14.5	13.75	15.75
23	7.25	14.5	23.5	9.25	14.25	2	35	28	41	9.75	23	22.75	11.5	18.5	18.25
22.5	6.5	19.75	21.25	10.75	17.25	4.25	36	28.5	31	10.75	26.75	26	11.75	14	22.5
31	7.25	18	19.75	15.25	16.5	5.25	28.25	38.5	35.5	8	41.75	33.5	13.5	15.75	19.25
38.75	7.5	8.75	13	5.75	8.25	1.75	23.75	24	33.25	8.5	26.25	15.5	9	7	11.25
15.5	4.75	4	14.75	2	6.75	1.5	16.75	21.75	37	10.25	17.25	13.5	8	4.25	16.25
18.25	8.5	5	16.75	3.25	7.5	2.75	18.75	21.75	36.25	8.75	20.5	13	5.5	6	15.25
18.75	7.75	5	17	4	5.75	2.75	19	21.25	39	9.5	17.75	18.5	7.25	8	15
12.5	8	4.5	13.5	3.75	8.25	1.75	15	20.75	31.75	7.25	21.5	15.25	7.5	6.75	14
22.5	9	8	19.5	6	10.25	3.5	16.5	25.25	34.75	9.25	31.75	17.5	6.75	9.75	11
17.75	7.5	5.75	14.5	4.5	6	1.75	17.5	24.75	28.5	7.25	27	14.25	10.5	8	12
9.75	9.25	6.25	17.5	5	9.25	1.75	18	27.5	33.25	9.25	25.5	21	5.25	8.25	20.75
9.75	5	16.25	11.75	3	4.5	1.5	15	32	32.5	13.25	23	20.5	15.5	5.75	33.5
6.5	4.75	12.5	9.75	1.5	4.75	2.75	14.75	26.75	18.75	11.5	22.75	15.75	9	7.75	21
5.75	4.5	11	15.25	2	4.75	1.5	16.25	25.5	22.75	9.25	21.25	17.75	8	4.75	23.25
7.5	5.75	8.25	16.5	1	7	3.25	14.75	31	25	10	33.75	22.25	8.25	10.25	26.25
8.5	8.75	5	17	4.25	8	2.25	13	23.25	31	10	26	18.5	9.25	4.25	17
36.5	7.75	7.25	26	6	10.25	2.75	15	18.5	31.25	8.25	41.75	20.25	7	11.75	12
24.5	4.75	3.25	27	8.25	8.75	3.25	10.5	19	24.5	8	30	17.5	5.25	10.5	12
24.75	5.5	5.5	31.75	8.5	10.25	3	11.5	18.5	38	6.5	39	20.5	4.25	11	7.75
18.75	6.75	5.5	21.75	9.75	8.5	2.25	14.25	19.75	51.25	5.5	44	18	5.5	15.75	10.75
17.75	6.5	5.25	20.5	5.5	5.75	3.25	14	20.5	26.25	10.25	33	19.25	4.75	10.25	11.5
4	3.25	2.75	19.5	3.75	4.5	1.25	15.5	9.75	5.5	5.25	15.5	8.25	2.5	5.25	5.25
1	3.25	1.75	16.5	2.25	3.25	0	13.5	6.5	6.5	1.75	7.5	9.25	1.25	5.75	4.75
5.75	2.5	0.75	20	4.25	4.25	1.25	11	4	15	5.25	10.25	10	3.5	2.25	8.25
7.25	2.5	1.75	15.5	3.25	5.75	2.75	9.25	8	19.25	3.75	17.75	5	3.75	3.5	7.5
0.5	2.75	0.5	15.25	1.5	3.75	0.5	11.25	8	8	3	10.25	10.25	3.5	2	4.5
2.75	2.5	0.75	12.75	2	3.5	0.25	9.5	7.25	15.5	5.75	11.5	9	1.25	4.5	4.75
3.75	2.25	1.5	16.25	4	5	1.25	6.5	5.75	11.75	4	10.5	5.5	1.5	4	8
4	3.5	4.5	14.25	3.25	7.75	1	7.75	9.25	23.25	8.75	6.75	8	3.25	6	11.5
2.5	2.25	1.5	10.5	3	3.5	0.5	7.75	10	13.75	2.75	9.75	7	2	1.5	5.75
8	4.25	4.5	15.25	5.75	7.5	4.25	11.25	6.25	18.5	4.75	13.5	3.75	5	3.25	4
6.25	5.25	3	10.75	4.25	5.5	0.5	9.75	9.25	17	2.5	12.5	2.5	3.75	2.5	6
4.25	3	0.5	13.25	1	5.5	0.5	7.5	4.75	10.25	4	8	8	1.25	3.5	3.5
4.5	1.5	1.25	14.5	3	4.25	0.5	4.75	4.75	19.25	4.5	8.25	4	0.5	4	3.75
2.5	3	4.25	8	3	4.5	2.25	5	9	21.5	5.5	8.75	7.25	1.5	2.75	9.25
3.5	3.25	1.5	13.25	3	6.75	1.25	10	5.75	14.5	3	12	5.5	3.25	4.25	8
3.25	3.75	1.5	12.75	2.75	7.25	1.5	6.25	5.25	10.75	3.25	10	5.25	2.25	3.5	4
6	1	2.25	13.5	4.25	5.75	1	5.25	7	22.25	2.25	8.75	5.25	7.25	2	5.75
3.25	2.25	0.75	8.25	2.75	3.25	1.75	8.25	3.75	12	2.25	6	5	1	3.5	1.75
3.5	2.75	1.5	10.25	3	5	0.5	7.25	4	13.25	1.25	10.5	2	1.5	4.25	3
6.75	2.25	1.5	12.5	2.25	5	0.25	8.25	6.25	17.25	2	13.5	3.25	3.25	2.25	5.75
3.5	1.5	1.25	8	1.5	1.75	0	6.5	6.5	8.75	3.75	4	5.5	2.75	2.5	4
3.75	1.25	1.75	11.5	3	5.25	2.25	7.25	7	19	4.75	10.5	5	3.25	1.75	7.5
3.25	0.25	4.5	14.5	3	5	0.5	8.25	4.25	7.5	4.75	6.5	5.5	1.25	3.25	1.5
2.75	1.5	1	11	3.5	4.25	2.25	4.25	5.25	17.5	2.25	12.25	3.25	4	1	4
2.5	2.5	0.5	10.25	1.75	3.5	1.25	8	3	21.5	2.25	7.75	2.25	5.25	2.5	2.75
1.75	2	2	14.75	2	5.25	0.5	8.5	9.5	19.75	3	9.75	5.5	3.75	1.75	8
3	1.5	3.75	4	5.25	3.5	1.75	3	9.5	15.5	1.75	14.25	2.5	4	1.5	5.25
2.75	3.75	2.25	11.75	4.75	6.25	1	7	4	7	3.5	6	5.25	3	2.25	5.25
3.75	2.25	0.75	15.25	3.5	5	1.25	5.5	3	12.5	2	13	3	0.5	2.25	5.75
5	2.25	1.75	9.75	1.75	4.75	1.25	7.25	5.75	22.25	4.75	12	5.5	2.5	1	6
5.5	3	2.75	9	4.5	6.25	2	5.75	4.25	17.75	2.5	14.75	3.25	1.5	1.75	7
1.75	1.75	1.25	9.75	2.25	4	1	5.5	3.5	13	1	10	3.75	2	2.25	6.25
4	2.5	1	9.5	1.75	4	1.5	8.75	2.75	10.25	2.5	8.25	5	2	2	2.75
2.5	3.5	1.25	12.25	5.25	6.75	1.5	9.25	4	21.25	4.75	13.25	4	2	2.25	4.75
2.75	1.25	1.75	10.25	7.25	4.5	1.5	2.25	3.75	19	3.5	14	4	3	0.75	8.25
5	2.75	2	8.75	3.75	4.5	1	5.25	5.25	10.25	2	6.25	3.75	1.75	3	3
5	1.25	1.5	6.75	1.75	3.25	0.5	4.5	4.75	16.25	4.25	8	1.75	2.75	3	3.5
1.5	4	2	10.25	7.25	5.5	2.5	8.5	3	8	0.5	6.5	3.25	2.5	4.5	2
9.5	1.75	4.5	11.75	3.5	6	1.75	9.5	5.75	28.75	4.25	8.5	6.25	3	2.25	6
5.25	3	3.25	8.25	2.75	6	1.75	6.5	3	18.75	1.75	11.25	1.75	2.25	2.75	4
2.5	4.25	2.25	12	5.25	5.5	2.75	5.25	4	18.75	3	16.5	4.25	2	1.75	6.75
4.5	3.75	3.25	6.5	4	5	3.25	5.25	9.25	26	3.25	8.5	6.5	6.5	0.75	6.75
4.25	2	2	11.25	5.75	3.5	0	10.5	3.25	10	2.25	5.5	2.25	1.75	4.5	2.25
2	2.5	0.25	9	1.25	5	0.25	11	2.75	11.25	3.25	15.75	2.25	1.5	1.75	2.75
7	1.25	3	8.25	2.25	5.5	0.25	7.25	5.5	14.25	5.25	8	3.5	3.25	1.25	6.25
3.75	1.75	2	8.25	2.25	4.5	1	6.5	2.25	6.75	0.75	9.75	2.75	2.5	3.25	1.5
4.75	3	3.25	9	3.5	5	1.25	8	7	23	1.5	7.25	3.25	3.5	2.25	10.25
2	2.25	2.25	9	4.25	7.5	2.5	4.75	3.75	21	1	10	2.75	1.75	2	4.25
8.25	3.75	2.75	9.5	3.75	4.75	3	7.5	6	20.5	2.75	14.5	3.25	2.25	2.25	6.25
4.75	3	1.25	7.5	4.25	4.5	1	7.5	4.75	14.25	2	9.25	5.25	1.5	2.5	2.75
7.5	2.75	3.75	10	4.5	5	1.75	9.75	4	22	2.5	19.75	4.75	4.5	5	6.75
8.5	3.5	2.75	11.25	2.75	6	0.5	12.75	14.25	35.25	4	30.75	5.5	8.25	4.75	5.5
1.25	1.5	0	8.75	0.75	4.75	0	9	3	10.25	2.25	7	6	0.75	1.75	1.5
3.5	1	2	10.25	1.75	4	0.25	7.75	5	18	1.5	7.25	5	0.5	1.25	3.25
3	2	0.75	10.5	3.25	3.75	1.25	6	5.5	8.5	5	8.75	3.5	3	4.25	5
4.75	2.25	2.5	12	3.25	3.75	1.75	8.25	3.5	9.5	3	8.75	3	1.75	2	2.25
5.5	2.75	4	8.75	4.25	5	2	4	7	29.5	6	12.5	2.5	4	2	5.5
3.25	3	5	10	3.75	4	3.5	8.5	5.5	21.25	2.25	14.5	7.25	5.75	3.75	5.5
3	3.5	4	14.75	5.25	7	3.25	7.5	4.5	20.25	5.5	10.5	3.75	4.25	3.25	5.25
4.75	0.75	2	8	4	3.25	0.25	6.25	9	18.75	5	9	4	3.25	1.75	8.25
6.5	3.5	3.25	8	6.5	7.5	2.25	7.5	3.25	12.75	1	16.5	2.75	2	3	3.5
2.75	2.5	2	8.25	3.75	5	2.5	7.75	7.5	17	1	10.25	2.5	2	4.25	4
2	3.75	3	7.5	5.5	5.75	2	7.5	2.75	11.75	1.75	13	4	1.25	2	3.75
3.5	5.75	3.5	10	7.5	6.5	3.75	9.75	3.25	30	0.75	10.25	3	1.5	1.25	4.25
6	3	3.75	13.5	4.5	4	2.5	6.75	7.5	22	2	8.25	4	3.75	2.25	8
5.5	2.75	3.25	8.5	3.25	6.5	2	8	5	21	3.75	13	3.25	4.25	2.25	2.5
4.25	2	1.75	8.25	4.75	5.5	1	5.25	5.25	12.75	3.25	11.5	5.25	3	3.75	5
5	3	1.75	7.5	5	4.25	1.5	7.25	2.75	14.25	2.25	6.25	3.75	1.75	3.25	4.5
4.75	2.5	2	7	4.25	4.75	1.25	5.25	2.75	13.5	3	10	3	2.25	1.75	5.25
6	4.5	2.5	9	5	6.25	1.75	5.75	3.75	14	6.25	7.75	1	1.25	2.25	3
3	5.5	3.75	13	5	8	2.75	7.75	4.75	26.75	1.75	18.75	1.5	7	1.5	10.25
4	1.75	2	8.5	3.5	4.5	0.75	6	5.5	20	2.25	7.25	4.5	2	2.75	7.75
6	5	3	12.5	4.25	6.5	2.25	10	3.5	13.75	3.75	17	5.5	3.5	1.5	4.75
4	4.25	3.75	10.25	5.25	6	1.75	6.25	6	20.5	1	11	2.5	2.75	4	4
5.5	4.5	3.25	9.75	2.5	8.5	3.25	8.25	4	16	3.25	8.25	2.25	5	2	3.75
1.75	2.75	2	12.5	4.75	6.5	2.75	8.75	6.75	17.5	2.5	9	4.75	5.5	1	4.75
4	3.25	3	9.5	8	5	3.5	7.75	7.25	20.25	1.75	18.25	4.5	3.75	3.5	6.5
5.5	1	1.25	9.5	3	5	0.75	5.75	6	15.75	2.75	10	4	3	1.5	10
3.5	1.25	3.75	8	1.75	4.5	0.75	7.75	5	15.25	3.5	4.5	3.5	0.75	4	5
1.75	1.25	1.75	8.25	4.5	5.5	0.25	7	2.5	16.5	2.75	9	2	1.25	2.25	4
3	2.5	2.75	7.5	3.25	4.5	1.25	7.5	5.75	22.25	2.25	13	3.75	2.25	2	9.75
6.75	3.75	4.75	10.5	2.25	4.5	0.5	7	6.25	22.25	2	16	3.25	3.75	2.75	3.25
3.5	3.25	3.25	5.5	2.75	4.75	1	5.5	6.5	22.25	1.5	9	4.5	3	1.75	4.25
3.5	3	2.5	9.5	4.75	6	2.75	10	4.5	11.75	1.75	8.75	3.75	3.75	1.25	5.25
9.25	5.25	6.75	10.75	7	5.75	4.75	9.25	4.25	18.5	2	10	3.25	4	4.5	6.75
5.25	5	2.25	9	4.25	5	3.5	6	9.25	27	1.75	7.75	5.25	2.25	2.5	7.5
3.75	1.25	2	11	4.75	5.75	0	6.25	6.75	16	1.75	9.75	3	1.25	3	5.5
2	1	3	8.75	4.25	5	1	5.25	4.75	14.25	1.75	7.5	4.25	3.75	2	3.25
5	1.75	3.75	3.75	2.5	3.25	0.5	6.5	7.75	25.5	5.75	12	3.75	4.5	1	8
3.75	2.75	3.25	8	5.75	5	2.75	8.25	3	17.25	1.25	8.75	2	3	2.5	4.5
4.75	2.5	1.75	8	2	7.5	0.75	9.25	3.5	12	1.75	14.75	3	2.25	3.5	3.5
4	2	2.75	8	3.75	4.25	1.25	9	2.75	8	2.5	9	3.5	3.25	2	3.25
2	2	2	11.75	4.5	2.5	1	7.75	3.25	18.25	0	9.5	3	1	1.5	3.25
5.5	1.75	2.5	9	3.75	4	1	8	3.5	21	5	16	4.25	2.75	2.25	5.75
2	2.5	4.25	10.25	2.75	5.5	1.25	12.25	4.25	20	1.75	15.75	4.25	2	7.5	3
8.25	2.75	3	9.5	3.5	6.75	2	5.25	2.5	12.5	2.75	10.25	1	2.25	2.25	2.5
4.25	3	2.25	9	4.25	5.5	2.75	7.25	4.5	18.75	5	8.5	3.25	2	3.5	3.75
1	2	3	12.25	5.25	6	1.75	11.25	8	21.75	2	11.5	5	1	2	8.5
8.25	3.5	6.25	8.5	4.75	8	4	6	7.25	24.25	3	12	4	5	4	5.75
5	2.75	3.25	7.5	6.5	7.5	2.75	7.75	3.5	21.25	3.5	12	2.25	4	2.75	4.5
3.75	3.5	4.75	4.5	6.75	3.5	2.25	6.75	5.25	23	1.75	7.75	2.25	4	2.5	7.25
4.75	2.25	1.25	9.5	5.5	3.5	0.75	6.25	2.75	10.75	0.75	12.5	2.25	3.25	2.25	2.75
2.75	3.25	1.5	8	4	2.75	1.25	10.5	5.25	21	1.5	9.75	5.25	2.75	2.75	5.75
5.5	2.25	2.75	8	2.5	4.25	0.25	5.75	6.25	17.75	2.25	7.5	4.5	3	3	8
3	2.75	1.5	11.25	6.25	5.5	1	7.5	2.5	15.75	3	10	2.75	3	0.5	5
2.25	2	2	5.5	2.25	4.75	0.5	7.25	0.75	24.75	1.5	10.25	1.75	1	0.75	4.75
3	4.5	4.5	10.75	8	7.5	3.5	5.5	3.5	19.75	1.5	10.75	2.25	4.25	1	4
5	3.75	5	9.5	6.75	8.5	2.75	8.75	4	13.25	2.75	8.25	3	5.25	1.25	5
3.75	1.5	2.5	9.5	5.5	6.25	1.25	6.25	5.5	23	3	5.75	2.25	4.25	2.5	5.5
6.5	3.25	2.25	8.75	4.5	4.5	1.75	6.25	3.75	16.5	3.25	13.5	3.25	3.5	4.5	5.75
4	3.25	3.75	6.5	2.75	5	1.75	6.75	8.25	24.25	3	11.5	5.25	2.5	1.25	8.25
5.75	1.5	2	5.25	5	7	2.25	8.75	4	21.25	1.75	9.5	2	2.25	3.25	6.75
2.25	2	2.25	7.5	4.25	6.25	2.25	9	2.25	16.5	2.5	10	3.75	2.25	2.5	3.25
2.75	3	2.75	8.25	4.5	4.75	0.25	10.25	4.75	16.75	2	11.25	3.25	3.25	3.25	5.25
7.5	4	3.5	9	3.75	6	3.5	6.25	9.25	30.75	2	13.75	3.75	2	1	7
6	2	3.75	7	5.5	4.5	1.5	6	5	25.5	2	12.5	1.5	2	1.5	4.5
4.5	2	2.25	8	3.25	7	1.5	5.75	3.75	20.25	1.5	14.25	3.75	5.75	1.75	8.5
6.5	1.5	3.75	6.25	3.75	2.75	1.5	7.25	2	20	2.5	10.75	2	1.5	3	6.25
6	1.75	1.75	9.75	3.5	6.5	1.5	6.25	7.75	17.5	2.5	6.75	1.75	4.75	1.5	8.25
3	2.75	2	8.75	5.75	4	1.5	9.25	2	13	1.5	9.5	3.5	2	2.75	5.25
4	0.25	1	8.25	5	3.5	0	4.25	3.25	11.75	2.5	15.5	3.5	2	3.25	4
5.5	1	2	8.5	2.75	2.75	0.75	11.25	5	21.5	1.5	14.25	4.75	2.25	3.5	3.25
2	0.25	0.75	10.25	1.75	3	0	7.75	1.5	15.25	1	11	3.25	1.25	1.5	5.75
3.25	1.5	2.75	11.25	1.5	6.5	0.5	8	5.25	17.25	1.5	8	2.75	2.75	2.25	7.25
7	2.25	3.75	6.75	3.75	4.25	1.25	6.5	6.25	24.5	2.5	11.5	1.75	6.5	2	8.25
4.5	2.75	4.25	8.75	6	3.75	2.25	10.25	6.5	23.5	3.5	10.25	3.5	2.5	0.5	3.75
8.75	2.25	2.25	9.25	3.75	6.75	1.25	8	3.75	17.5	3.25	12	3.25	1	4.25	4
1.75	3.25	2.25	6.25	4.25	4.5	1.75	5.25	4.5	29.25	1.5	12	4	2.25	4.75	5.5
3.5	3.25	3.75	11.25	3.5	5.75	2	6.75	2	20.75	1	9.25	1.75	0.75	2.5	3.25
3.75	3.25	2.75	10.75	3.75	5	1	8.5	3	10.5	2	10.25	1.75	2	1.5	3.25
4	2	2.25	9	4.5	3.75	1	5	3	11.5	3.25	9.25	4	1.25	2	3.75
4.5	5.25	8	8.75	8	6.25	3.25	8.25	7.25	27.75	2.75	6.5	3.75	1.5	3.25	9
4.5	2.5	2.75	6.75	5.25	7	2.25	5.25	5	20.75	1.75	8.25	1.25	2.75	1.25	5
1.75	2.75	3.25	5.25	4.25	4.5	1	8.5	3.75	19.25	2.25	10.25	4	2	3.75	4.5
3.75	3.25	3	8.5	3.5	5.5	1.25	6	6.25	21	3.25	13.5	1.75	1.75	3	6
2.25	3.75	2.5	6.75	7	9.25	2.75	6.5	4.5	25	2.75	11.25	1.75	4.75	1.75	6.25
4.5	2.5	4.5	10.5	7	4	2.25	9.75	3	26	1.75	14.75	3	4	1.25	5.5
8.25	4.25	5.5	7.75	3.25	7.25	2.25	6.25	5.5	20.5	1.5	19.5	4	4.75	2.25	7.25
3.5	5	3.25	9.25	5.25	11.5	4.25	7.25	6.5	16.75	0.5	7.25	4	3.5	1.25	6
5	5	2	11	2.75	5.5	1.75	10.5	8	8.75	2.25	9	6.25	1.75	2.75	2.5
7.25	7	1.75	21.25	2.75	8	3.5	8.5	7.75	10	2.25	9.5	4.5	1.75	3	2.25
1.25	5.75	2.75	15.75	2.25	9.25	1.5	6.5	11.75	11.75	4.25	14.5	7.5	6.75	2	10
3.5	5	3	18.25	4.25	7.25	2.5	11.25	13	27	2.5	13	6.5	7.5	4.5	7.75
2.75	5.25	1.75	14	3.5	7.75	2.25	10.25	14.5	22.75	2	7.5	6.25	5.25	3	6
1.5	3.5	1.25	14.5	3	6.25	2	8	9.75	15.5	1.5	10	5.5	3.75	2.5	4
1.5	7.25	1	12.75	10	6.5	1	12.5	4.25	6.75	3	5.25	7.5	1.75	4.75	2.5
7.5	7	1.5	17	6.25	8.5	1.75	8	12.75	8.5	3	9	8.75	2.25	8.75	3.25
10.25	7.75	1.5	20.5	4.75	6.25	1.75	8	7.5	7.5	3	8.5	5.5	2.75	5.25	3.5
8	6	1.75	20	9.5	7	1.5	7	7.25	10.75	3.5	8.25	5	3.25	4.5	3.75
7	4.75	6.25	21	6.25	6.5	3	6	12	10.25	2.5	11.25	7.5	6.25	5.5	3.75
3.25	6.5	9.75	23.75	8.5	5.25	3.25	7.5	23	24.25	4.25	21	7.75	6.5	5.75	10.25
5.75	8	6	17.75	8	7	5	15	12.25	13.75	4.25	8	10.5	5	5	5
5.75	6.5	3.75	20.25	11	7.25	2	8.25	15.75	6.25	2.75	5.5	11.5	2	7.5	4.75
9.5	6.5	9.75	18	6.5	9.5	4.5	10.5	21.5	9.75	3	18.25	11.75	3	7.5	8.75
4.25	7.5	2	20.5	6.25	7.25	2.5	9.25	9.75	11.75	4.5	4	5	3.75	2	5.5
11.75	5.25	1.5	19	13.25	5.25	0.75	8	6	13.75	3.5	9.25	3.75	0.5	2.25	3
11.75	8.5	4	19.75	10.25	6.5	4	12.5	13.75	8.75	5.25	15	10	5.25	5.25	12.25
6.75	5.5	3.5	12.5	15.5	9	1.5	11	18.75	12.25	4.5	12.5	7	4.75	5.25	8
9.25	8.75	5.75	13.75	10	8.75	3.25	10.25	21	10	4.5	14.5	9	2.5	5.5	8
16	9.5	2.25	19	10	10.25	1.75	12.25	16.75	12.25	4.5	16.75	13	4.25	5.75	7.25
16.25	6.25	3.25	12.75	12.5	15.5	1.25	9.5	12.5	7.75	2.75	9.5	8	1.5	3.75	5.25
14	7.25	4.5	13.5	10.75	18	1.25	11	14	21	5.75	23.5	7.5	6.5	5.25	10.75
10.75	8.5	4.25	17.5	11.25	12	4.5	10	15.5	16.75	7.25	18.75	12.25	7	8	6.75
9.75	6.25	4.5	12.75	13.75	7.75	1.75	7.5	16.25	16.25	8.5	9.75	9	7.75	6	13.75
10.5	9	3.25	15	11.5	11.75	3.5	8.75	20.25	22.25	4	17	9.75	3.75	3.75	10.5
8.25	7	2.5	17.75	15.25	8.25	1.75	8.25	19.5	38.75	4.5	9	9.25	6.5	3.5	10.25
7.25	9.5	5.75	18.75	9	10.25	4.75	12.75	15.75	24	3	20.75	13.75	7.75	9.25	11.75
7.25	10	5	17.25	7.75	11.25	1.5	9.25	15	14.5	4.25	8.25	6.25	2	5.25	6.5
18.75	9.25	10	18	4	13.75	1.25	19.25	11	14.75	2	21.25	13.25	5.25	7.25	7
11	5	5.75	16.25	5.5	11.25	2	13.75	12.25	10.5	4.75	6	7.75	5	6.5	6.75
15.25	3.75	8.75	17.25	9	9.75	1.25	13.5	9	8.5	2	10.25	6	6.25	6	4
35.5	4.5	15.5	23.5	5.75	12	2	35.5	11.5	15.75	5	19.5	17.75	10.75	21	7.5
7.5	2.25	0.75	16	5.25	2	0.75	8.75	4.75	5.5	6.5	2.75	7.25	1.5	3	4.5
5.75	2.5	1.5	11.25	7	0.5	0.5	10.75	6	20.25	4.75	7	8.75	1.5	1.75	5.25
8.25	0.75	1	9.25	4.75	2.75	0	9.5	8.5	20.5	4.5	9	5	2	4.25	9.5
5.25	2.75	5	10.75	1.25	5	0.75	7.75	9.5	26.5	4.5	8	7.5	2.75	1.5	11.5
4	2	1	9.25	2.5	4.25	0.5	9.75	4.5	15.5	2.5	8	5	3	6	3.5
8.25	2.5	2.75	11	5.25	6.5	1.5	6.5	5	25.25	3.5	11	6.5	1.5	3.5	5
8.5	1.75	0	10.25	3	2.75	0.75	9.75	2.75	13.75	3.75	13.75	4.25	1	3.5	4.25
14.25	2.75	3	8.25	2	3.25	0.25	10.5	5.75	23.5	4.25	10	3	4	4.5	6.5
3	1	3	10	3.75	5.25	1	8.5	3.25	21.25	1.75	12.25	4.25	1.25	2.75	3.25
7.75	3.5	6.25	7	4	7.75	2.75	9	9	26.5	4.5	16	2.5	2.75	4.75	5.75
3.5	4.25	3.5	8.5	3.75	7	2.75	9.5	2	27	1.5	13.75	4	7.5	4	6.25
4.75	1.75	2.75	9.5	3.5	4	0.5	6.25	4	16.5	2	12	4	1.5	2.25	3.75
2.5	2	2.25	9.25	4.5	2.5	1.25	4.25	4.5	16.25	3	10.5	3	2	2.25	4.75
9.5	2.25	3.25	9.25	4.5	6	0.5	19.5	7	22.75	1.75	12.25	7.25	3.25	6	2.5
0.75	1.75	0.5	7	3	3.5	0.75	10	1.25	11.5	3.5	6.25	5.25	0.5	3	2.5
9.5	2.25	0.75	10	2.25	5.5	0.75	11.75	5.75	20.5	2.5	11.75	3	3.25	4.5	5.5
6.75	2.25	4	8	2.25	5.25	1.75	7.5	11.5	36	6.25	12.75	5	4.75	2.25	8.5
4	3	2.75	6.5	4.25	5.5	1.5	4.25	3.5	12.5	1.75	6.25	4.75	1.75	0.75	3
3	2.75	3.75	6	7	4.5	0.75	4.25	2.75	14	2.75	16.5	3.5	1.25	0.5	6.5
9.75	1.25	5.25	11.5	3.75	3.75	0.5	17.25	5.75	14.75	1.5	14.25	6.5	3.5	10.25	4.25
3.5	1.75	1.25	9	1.5	3.5	0.25	12.25	5	8.25	0.5	9.25	4.75	4	3.5	3.25
5	2.5	0.75	7	3	4	0.25	10.75	3.5	16.75	4	7	5	2	3	2.75
10.5	3	1.75	10	2.25	3	1.75	7	3.75	18.75	3.5	17	2	3.75	6	2.5
5.75	2.25	2	11	2	6	1.5	7.75	3.25	16	2.25	11	3	2	4.5	3
3.75	3	3.5	9.25	3.25	5.5	1.25	7.25	3	8.5	3.5	6.75	3.5	4.75	2.25	2.5
4.75	3.25	3.75	6.25	4	4.5	3.25	7	2.25	22	2.75	8.25	2.25	1.75	1	3.75
5	3	4	8.25	5.75	3.75	1.5	9.75	4	29.5	0.25	15.25	2.75	4	1	7
1.25	2.25	1.25	5.25	3.25	3.25	2.5	6.75	8.25	19.25	1.5	14	4.75	3.75	1	7
7.25	6.25	4.75	7.5	8	8	2.25	8.5	8.75	20.25	2	16.75	3.5	5.75	1.75	9
4	2.75	6.25	9	2	3.75	1.25	10.5	2.5	16.25	1.5	14.5	4.75	0.75	3.25	3.5
3.5	0.75	2	3.5	1.25	1.75	0.5	3.25	11	23.5	2.25	8.75	4	3	1.5	10.5
4	2.5	3	9.75	3.5	4.25	1	7.5	3.25	25.5	6	6	1.75	2	4	4
5.5	3	1.25	5.25	2.75	4.25	0.75	8.25	3.75	19.25	2.25	16.25	1.25	1.25	3.5	6
12.5	2.5	5.75	5.5	4	4.25	1.5	5.75	5	22	3.75	9.5	3.5	1	1.75	7.25
6.25	1.5	3.75	4.75	2.5	2.75	0.75	6.25	3.5	17.5	2.5	5.25	0.5	2	2.25	6.25
4.75	1.75	3.75	5.75	4.75	5	1.75	6.25	2.75	15.5	1	8.5	2.25	2	2.25	5.25
2.25	3	2.75	6.5	4.25	5.25	1.5	9	4.25	19.25	1.5	7	4.25	0.75	1	3.25
5	1.25	4.5	4.75	3.75	2.5	2	4.75	5	23.5	2	10.5	3.5	1.75	1.5	3
4.25	3	2.75	11	6.25	13.75	2.75	9	2.5	10.5	3.5	15	2.75	2	2.25	3
6.75	2.25	3	8.5	4.75	4.25	1	7.25	2.5	12.75	2.5	9.5	3.25	2	2	2.25
2.75	2	2	5.75	3	4	1	7.75	4.25	14.75	1.5	7.75	1.75	3.5	0.5	5.5
2.75	3.75	3	7.25	5.75	5.25	2	7.25	3.75	23	3	11.75	3	4.5	1.5	6.5
9	3.5	4.75	8.5	3.75	6.25	3.25	7.25	3	21	1	10.25	2.5	4	2	2.5
11.5	1	3.25	4.5	4	4.25	1	8	11	19.75	2.5	10.25	4.25	5	1.75	7.75
2	1	2.25	6	5	4	0.75	5.5	2.5	12	0	13.75	1	0.25	0.5	2.25
3.25	1.75	1	5.75	3.5	4.75	1.5	6.25	2.25	12.5	1	12.5	3.25	2.5	2.75	5.25
1.75	2.25	1.5	5	4.75	3.75	0.75	7	3.5	27.25	1.75	8.5	1.5	3.25	1.25	5
7.5	2.5	2.5	7	3.25	3	0.75	7.25	6.75	20.75	2.5	9.5	2	2	1.25	6
3.75	1.5	1.75	4.25	1.25	4.25	1	6.5	4	13.75	2.75	11.75	2	0.75	4	1.75
5	2.5	1.75	6.5	2.5	4.25	1	8.5	2.75	15.75	2.75	7.5	1.5	2	1.5	1.75
3.75	2	3	8.5	6.25	5	0.5	7.75	2.75	22.25	3	16.75	2.75	1.75	2.5	4.75
1.75	2.5	2.75	8.75	3.5	2.5	1.25	7.5	3.25	13.25	2.5	8.25	4.25	1.5	3.5	4
6	2	4	5.25	1.75	4.75	1.5	4.75	9.75	21.5	4.5	8.75	2.75	2	4.25	8.5
1.5	4	2.75	7.25	5.75	5.75	1.75	7	3.75	15	0.5	5	4.25	2.75	3.25	5
5.25	3	2	6.25	2.75	4	1.5	5	5.5	20.25	1.5	13.25	1.5	2.5	1	6.5
4.75	3.75	3.75	8	3.75	5.75	2.5	8.5	1.5	9	2.25	10.5	2.25	0.75	3.5	3.25
6.75	3.75	5.25	7	4.25	4	1.5	5.25	7.75	23.5	3	6.5	3	3	2.75	8.25
5	1.75	1.5	6.25	9.25	4	0	7.25	3	16.5	1.75	18.25	4	1.75	2.25	2.5
5.25	5	5	8.25	5.25	5.25	3	9	5	16.25	2.75	10.25	1.75	3	5.5	4
4.5	1	3.25	6.25	2.75	3.5	1.25	7.5	2.75	18.25	1.75	8.25	2	0.5	3	4
4	3.25	4.25	6.75	3.25	5.75	2.75	9	3.25	12.25	3.25	10.75	3.25	2.5	2.25	5.75
4.5	0	4	5.5	3.5	2.25	0	2.25	4.5	22	2.75	10.5	3.5	2	2.25	5.75
8.25	2.25	6.5	3.5	3.25	3.75	0.5	4	4.25	22	3	8.75	3.75	2.5	2.75	9
4.25	1.25	1	5.25	2.5	2	0.5	6	3	8.75	2.75	6.5	2.25	0.5	1.75	1
4.5	1.5	2	8	1.25	4.25	0.5	7	4.75	12	2.75	11.75	2.5	2	3.5	2
1.5	0.5	1	6.25	3.25	4.75	1.25	6.5	2.75	21.75	3.75	9.25	2.5	0.75	1.5	3.75
3.75	1.5	2.25	5.5	1.25	2.75	1.25	7.5	0.75	18.25	1.75	6.75	1.5	3.5	1.75	2.75
9	2.25	3.25	7.75	3.25	6.5	1	7.25	2.5	22.75	1.25	13.75	1.5	1.5	1.5	3
2	2.5	1.75	5.5	2.5	3.25	0.75	5.75	10	22.75	1	10.75	5.25	4.5	2.25	12
2.75	6.25	3	7.75	6	5.25	3	9	2.5	10.5	0.75	12.75	1.25	0.75	2.25	1.5
4	3.25	3	8	3.75	6.25	1.5	8	4	21.5	1.75	12.5	4.75	5.5	1.25	3.5
3.5	2	2.5	6.5	2	5.5	0.75	6.5	2.75	17.75	1.25	15	2.25	3.75	3.5	4
5.75	6	6	8.25	6.75	8.25	3.75	7.25	3.25	26.25	1.75	9.25	3.5	3	1.25	6.5
7.25	2.75	6.25	6	4.5	4.5	2.75	5	3.25	17	3.75	7.5	2.75	1.75	1.75	4.75
2.75	2	1	4.25	2.5	2.25	1.5	6.5	1.5	7.75	3.5	8.25	2.5	0.25	5.5	6.25
3.25	2	1	4.5	2.75	1.75	0.5	5.5	6	30.5	2.75	8	3.5	2.75	0.75	5.5
7.25	2.25	1	9	7.75	6	1.75	6	1.5	10.75	1.25	14	1.25	1	2.5	2
5	3.25	1.75	6.5	2.75	4.5	1	7.5	2	12.75	2	7.5	2	3	1.5	2.75
7.75	2.25	4.75	8.5	5.25	6.75	2	7.25	3.75	28.25	3.75	10	2.5	1.25	1.25	4.75
2.25	2	1	4.25	3.25	4	1.25	8.5	2.5	17	1	11.5	1.75	3	2.25	4.5
7.25	2.75	1.5	7	9.75	5.5	2	9.25	3.75	12.75	2.75	13.25	2.5	1.25	0.5	3
2.5	1.75	2.25	5.5	4.25	2	1	6.5	4.75	17.25	1.5	6.25	2	1.75	2.75	3.5
4	1	3.75	5.5	3.75	5.25	0.5	4.5	2.25	20.5	1	9	2	1.75	0.75	5
6.75	3.5	2.5	7.75	5.25	3.5	1.5	8.75	4.25	28.75	3.5	9.75	2	3.5	1	4.25
4.25	3.75	5.75	8.75	5.75	7.25	3.25	8.25	5	13.5	2.75	6.25	2.25	1.5	5.75	4
4.75	1.5	1.75	5.25	1.25	4	1	3.75	5.25	19	0.5	7.5	3.25	3	1	8.75
7	1.5	2	5.5	5.75	1.75	0.75	6.5	4.75	15.5	1	9	2.25	3.5	1.5	6.25
4.25	2.5	2.5	6.25	4	4	2.5	5.5	3.25	15	2	3.75	3	1	1.5	6.75
3.25	3	2	6	2.75	4.5	1.25	8.25	2.75	10.75	2.5	12.75	2.75	2.25	3.5	3.5
4.75	1.25	2	5.25	1	2.75	0.25	5	2.25	15.25	3.25	8.5	2	2	1.5	4.75
4.5	1	1.25	4.5	3	4.5	1.25	5	3.25	16	2.25	16.75	2.5	1.5	0.25	3.5
4	2.25	0.75	8.75	4.75	3.5	1.5	10	1.5	12.25	1.25	6.75	3	1.25	3.25	3.25
7.5	3.25	3.75	6.5	2.75	4.25	1.75	6	2.25	25.75	1	10.25	2	4.5	1.75	4.75
9.75	3.5	4.25	8.75	3.75	3.75	1.5	5.5	6.25	24.25	4.25	9	2.75	3.75	1.5	7
2.25	3.5	2.5	7.5	3.25	8	2.5	9	2.5	15	1.5	10	2.25	1.75	2	2.5
3.5	2.75	2.5	9	5	4.75	2	8.25	3.75	12	1.5	4.75	4.75	1.25	3.25	2.75
3.5	1	2	5	3.25	4	1.25	6.25	6.25	20	1.25	8.5	1.5	4.75	1	6
2.25	1	2.25	5.5	2.75	5.25	0.75	7.5	1.75	18.25	1	8.5	2.25	5	2.25	5.75
3.5	1.75	2.5	7.5	4.5	3.5	0.75	7	1.75	20.5	2.25	15.25	2	1.5	0.75	5.5
3	1.25	5	7.5	2.5	6	0.75	6	4.75	22.5	1.25	11	3	2.25	0.5	7.5
3.75	2.25	1	4.25	3.25	5	0.25	3.75	4.75	17	2.75	6.5	2	2.5	1.75	3.75
4.25	2.25	2.5	6.5	4.25	3.75	2	6.5	5.25	19.25	2.25	10.75	2	4.25	2	5.5
4.25	2	2.5	7	2.25	5	1.75	10.5	2.25	21.5	1.5	15.75	4	4.5	2.25	4.5
2.25	3.25	5.25	10.5	6.25	6.5	2.25	10	4.25	11.75	2.5	11.5	3.5	2	2.75	3.75
2	3	2.25	3.5	2.75	3.75	0.75	7	5.5	24.25	2.25	13.25	3.75	3.25	2.25	4.5
4.5	4	4.25	7	4	4.75	2	5.75	3.75	17.75	0.75	8.25	3.5	5.5	1.25	4.25
7.25	2.25	5	5.5	4.25	1	1.5	3.75	6	20.5	3.5	7.75	3.25	3.25	1.75	6.25
6	0.75	2	4.5	3.75	3.25	2	4	2.5	15.25	4.5	8.5	2.25	1	2.25	1.5
4.5	1.25	1.25	8.5	7	3.75	0.75	7.5	2.5	13	3	12.75	3.25	1	4.75	2.5
5.25	1.5	4.25	3.75	3	3.5	1.25	5.25	4.75	21.5	1.25	14.5	3.5	3	2	5.75
4	0.75	2	6	1.75	2.75	0.75	10.5	7.25	15	1.5	15.75	4.25	6.25	3.75	2.25
6	1.5	1	8.75	1.5	4.5	0.5	5.75	1.5	12.5	1.5	9	3.25	1	2	2
4.5	2	1	5	3.75	3.25	1.25	6.75	3.25	17.5	1.75	7.75	2.75	2.5	0.75	3
5	1.75	2.25	7	3.25	3	2	10.5	3	17.5	6	9	2.25	1.75	2	6.25
5.75	2.75	3.25	10.25	3	4.75	1	8.25	3.5	28.5	3	11.75	2.25	1.25	1	5.25
4.75	2	0.75	5.25	3.75	6	1.75	10	3.5	22.75	1.5	13	1.5	5.25	1.75	6.25
7	1.75	3.25	7	1.75	3	1	5.75	3.25	16.5	3	5	2.75	1.75	2	2
10.5	3.5	7	6.5	4.5	4.75	2	7.75	7.5	30.5	4.5	12	3	3.5	3.25	9.25
3.5	3.5	5.25	7.5	4	6.75	2.25	7.25	6	18.25	1	10.25	3.75	2.5	2.25	6.5
2	3.75	4	6.25	4.5	5.25	1.5	8.5	2.5	16.5	2.5	9.25	1.75	1.5	3.5	3.75
4	2	2	6	4.5	3.75	1.25	5.75	3.75	14.25	1.5	12	3.5	1.5	2.75	1.75
3.25	3.25	2.5	6	2.5	5.25	2.75	5	6.5	25	1.5	12.75	2.5	2.25	3	4.75
2.75	3	3.5	6.75	4	6.25	2	12.25	3	24	2.25	12.25	2.75	1.75	1.5	6
5.25	3	3.75	8.75	7	7.25	2.25	9	4	20	0.5	13.75	2.25	3.5	2.25	4.75
5	1.75	3.75	5.75	3.25	2.75	0.75	7.25	9.25	22.5	1.75	6.75	3.25	4.25	3.25	4.75
2	2	3.25	9.75	2.5	6.25	1.25	8.25	4.25	18	2	9	2.25	3	2.5	2.5
4.25	3.75	2.5	9.5	6.75	11.5	1.5	9	4	17.5	2	13.25	2	1.75	3	4
4.5	3.25	4.5	4.25	3.25	5.5	3	5	8	29.75	3	10.25	2.75	2.5	2.75	6.5
8.5	1	2.75	7.75	5.5	4.75	0.75	4.75	5.75	18	2.25	10.75	3.25	1	2.75	3.5
1.75	0.75	0.5	4.75	4.5	2.5	0.75	5	2.5	9.75	2	11	2.5	2	1	4.5
8.5	2	2.5	4.5	2.25	1.75	0.75	3.75	5.75	17.5	4	6.75	3	2	2	4.5
2.75	1.75	1.5	4.75	3.25	3	0.25	9.25	3.5	20.5	2.5	4.75	1.75	1	1.5	5
8.75	2.75	3.75	8.75	6.5	4.25	1.5	8.25	4.25	24.5	2.75	13.25	3	2.75	1.75	4.25
6.75	2.25	1.5	8.5	5.25	8.5	1.5	8.75	4.25	12.75	3.25	15.5	2.5	2.5	1	2.75
2.25	2.75	3.25	4.75	3.75	4.25	1	8	2.5	14.25	1.75	5.5	4.5	3.25	1.75	2.75
4.25	3.5	2.5	4.75	2.75	7	1.25	5	6.5	24.25	3	11	3.5	5.5	1.25	9
1.5	3	2.5	8.25	5.25	2.75	1	7.25	3.25	16	0.5	5.5	3.25	1.75	3.75	3.75
6	4	3	9.25	4.5	7	1.25	11.5	5.75	17.5	1.75	12.25	5.25	4.25	4.75	8.75
5.75	3.5	3.5	10	3	7.75	1.25	7.5	7	23	2.75	9	2.75	2.75	1.5	6.5
8.5	3.5	1	4	2.25	5	1	9.5	8.25	13.75	2.75	6.25	2.5	2.75	1	6.25
1.5	4	3.75	9	4.5	7	1.5	10.25	4.75	19	1.25	7.5	3.25	3	3.75	3.75
6.25	8	3.5	9.25	1.75	8	2	7.25	6	20	1.75	10.75	3.5	1.5	2.75	5.5
12	5.5	3.25	13	1.75	8.5	3	6.75	7.25	13.25	0.75	8	3.75	2	4.5	1.5
15.75	5.25	6.5	19.5	2	9.75	1.75	7.25	9.25	10.25	3	12.75	3.5	2.75	5.5	3.25
4.75	6	4	13.5	3.75	7.5	4	11.25	15	13	4	14	4.75	6.75	3.5	6
1	5.5	2	18.25	1.75	5.75	2.75	8.5	15.75	12	4.75	14.5	4.5	1.5	3.5	6.5
1.75	2.5	2.25	16.25	8	6	1.75	5.5	8	9	4	5	4	3.5	2.75	5
5.75	6.5	4	19	5.75	10.25	2	11	16.25	17.5	2.75	9.5	7.25	6.75	3.25	10
15.75	6	2.5	19.75	2	7.75	2	11.25	14.5	8	4.5	6.75	6.5	4	6.5	3
9	3.75	1.25	20.75	4.75	7	1.75	7	13.5	8	4	9.5	5.25	2.25	6	4
4.5	7	3.75	17.75	2.25	6.75	1.5	6	6.25	11	2	5	4.5	0.75	4.5	1.5
16.25	5	6.25	20.75	1.75	6	2	7	8.75	12	4.5	6.25	5.75	3.75	5.5	1.5
16	7.75	6.25	17.5	3.75	7	5.25	8	9	11.5	2.75	11	3	1.25	5.25	2.5
11.25	8.5	13.5	13	7.25	17	1.75	6.25	17.75	6.5	4	20.25	8	2.5	5.5	7.75
3.5	7.5	2.75	13	8.25	7	2.75	3	11	11	2.75	2.75	5.75	2	2.25	4.5
5.75	8.25	9.5	17.75	9.75	11	3.75	11.25	12.5	7.25	6.25	14.25	10	2.75	3.75	6.25
1.25	5.5	6.25	10	13	7	3	4.25	12.75	13.5	4	11.25	5.5	2.75	2.75	10
10.5	9.75	5.5	22.25	5.5	9	3.75	10.75	16.75	11	5.5	19.25	13	3.5	5.5	8.25
9.75	4.5	3.5	14	3.25	8.5	2.25	10.25	11.75	7.25	6.5	14.5	7.25	6	1.75	8
15	1.75	4	14.5	2.75	3	1.5	17.75	8.75	15.25	4	9.75	8	1.75	6.5	4.25
8	2	2	15	6.25	3.25	0.25	13.5	8.75	18.25	2.25	13.25	5.25	1.5	3.5	4.75
0.5	2.75	1.25	10	4.5	1.25	0.75	11.5	6.5	15.75	1.75	7.75	4.25	3.25	2.75	1
1.75	2.25	0.25	10	4.75	3	0.25	11.25	2	23	3.5	9	6.25	1.5	4	2.75
8.75	1.5	1.75	9.5	3	3.25	1	6.25	4.5	22.75	6	8.5	4.25	1.25	2	4
7.75	2.5	6	6.75	1.5	5.25	0.75	6.5	9	26.5	3.5	16.25	5	4	3.5	8.5
2	2.75	1.25	8	1.75	3.75	0.25	10.75	2.75	13.75	2.75	4	2.75	0.25	3	3
4.25	2.5	0.5	9.75	3.75	4.25	0.25	10.5	4	17.75	2	8.5	6.75	1.75	5.5	2.75
15.5	2.25	5.25	9	3.75	4.5	0.75	9	6.5	34.5	5	11.25	5	5.25	2.5	10
2.5	2.5	2	6.5	4.5	4	1.25	10.75	3.25	21	2	11	3.75	0.5	2.25	2.25
2.25	3	2.25	8	3.25	5.75	0.75	10.75	6.75	15	1.5	9.75	4	1.75	4.25	3.75
3.75	1.75	0.5	5.5	3	6.25	1.75	3	10.75	22.25	2.5	6.75	3.75	4.75	0.25	10.25
2.25	0.5	1	9.5	10.25	5	0.5	6.75	3.5	13	2.25	16.5	3.5	2.25	2.5	2.75
4.75	2.5	3	6.75	2.75	5	2	9.25	2.5	12.75	7	10	1.75	2.75	2.25	3
7.5	2.25	3.5	5.5	4.5	4.5	1	5.5	6	22.5	1.75	13.5	5.25	3.75	3	5
2.75	2.25	3.25	7.25	4	5.25	1	8.75	5.25	29.5	3.25	12.75	4.75	2.25	1.75	10
5.25	4.5	3.75	7.75	4	4.25	1	6	5.5	20.5	1.5	10.25	5.25	1.5	3.25	7.25
12	2.25	6	3.5	3.75	3.25	1	3	7.5	34.25	3.5	10.75	3	3.25	1	14.25
6	4.5	4.75	9.25	3.75	5	1.5	13.25	3	14	1.75	4.75	4.75	2	3.25	0.75
5	4.5	3.75	7	6.25	8.25	2.75	7.75	4	11.5	1.75	5	4.5	2.5	2.25	2.25
1.75	1	2	5	2.5	5.25	1.25	7.5	3.5	18	1.75	12	2.25	1.5	1.25	9
5	3.75	4.5	9	4.25	6	2	7.5	3.75	22.25	2.75	16.5	4.75	6.5	2.75	6.5
4.75	1	2.75	5.5	2.25	1.5	0	4	5.25	21.5	2.25	6	2.5	2.25	2	4
2.5	2.25	1	9.5	2.25	3.75	0.25	11.25	7.75	15.75	2.5	5.25	3.75	2.5	4.25	2
2.5	2	1.5	5.75	3	2.5	0.25	7.5	2.5	13.75	4	3.75	3	2	1	4.25
7.25	2	1.25	9	2.25	5.25	0.5	8	2.5	11.75	2.75	11.75	1.5	1.5	2.75	1.5
3.75	1.5	2.5	7.5	10.5	5.25	0.25	6.75	4.25	14.25	3	8.5	1.75	2.25	1.5	4
4.25	1.75	3	4.25	2	5	1.25	4.25	2.25	22.25	1.25	11	2	2.75	0.5	5.5
3.25	1.75	1	5.25	2.75	4.75	1.25	6	5.25	29.25	3.5	7	1.5	3.5	2	5.5
3	2	1.5	6.25	4	2.75	1.25	6.25	4	21.75	1.25	11	3	4	0.75	4.5
4.25	2.75	2.25	7	3.25	4.75	1.75	8.75	4	24	2	8.5	2.25	3.5	1.5	3.25
8	3	4.5	6.75	4.25	4.75	1.75	5.5	10.25	23.25	2.5	5.5	2.5	3.5	1.75	5
3.25	1.75	1.5	4.25	1.75	3	0.75	7	5.5	24	3.75	9	4.5	4	0.75	7.5
6.25	3	2.5	9.5	2.5	4.25	4	10.25	4.75	24	3	10.25	2.75	3	4.5	4.5
4.25	3	2	6.75	5	3.75	1.75	5.5	7	20	1.5	11.5	4.75	1.75	3	7.75
3.75	1.5	1	4.75	3.5	3.75	0.5	6	5.5	13.25	1.75	8.75	0.25	8.5	1.25	4.75
8	2	0.25	10.25	4.25	3.25	0.25	7.25	2	9.25	1.5	12	2.75	3.25	2	1.75
2	1.5	2.25	4.25	1.75	3.5	0.75	5.75	2.5	24.75	2.75	8	2.5	3.25	2.75	3
12.5	0.25	8	6.25	2.5	2.5	0.5	6.5	7	26.5	4.25	11	4.75	2.75	1	7.25
6.5	2.5	2.5	6.25	2.5	5	1.75	7.25	4	13.5	1.25	16.75	2.25	1	2	2.5
2.5	2.25	2.75	9	4	5.5	1	6.75	3.5	22.25	2	8.25	3.25	4	1.25	6.5
5.5	1	2.5	8	4	4.25	1	4.75	7.25	19.75	1.5	10	2	3.5	2	6.75
2.75	0.75	3	6.5	2.25	3	0.5	5	3	11.25	1	7.25	2.75	1.5	1.25	3.25
9.25	1.5	2	4.75	2.25	4	1	4.25	3	17	5	9.5	2.75	1.5	1.5	6.5
4	1.5	2.75	3.75	2	4.25	1	4.75	2.75	16.5	1.75	9	3.5	2.25	0.75	7.25
8	1.75	2.25	6.5	3.5	3	0.75	4.5	1.75	14	0.75	9.5	2	3	1.5	3.25
2.5	0	1.5	4.5	1.75	4.5	1.25	5	3.25	11.5	1.25	8.5	4.5	0.75	1.25	2.25
2.25	1.75	2.25	8.25	3.75	6.75	1.75	8.75	5.5	19	1.25	11.25	2.75	1.75	1.25	4.5
6	2.5	2.25	7	9	4	0.75	8.5	3.5	9.5	1	18.5	3	0.25	2.5	2.75
6.75	2	2.5	6.75	3	4.5	2.25	6.5	5.25	23.5	2.25	8	2.5	4	1.5	4.75
7.75	4.75	3	6.75	4	4	2.25	8	6.75	20.75	1.25	12.25	4.25	1.75	1.75	6.75
2.25	2.75	3.5	5.75	4	5.5	2.5	8.75	4	17.25	1.5	7.75	2.5	1	1.5	4.5
11.25	2.75	2.75	5.25	5.5	6.5	1.5	8	3.25	12.5	1.25	8.25	1.5	0.5	1.75	2.75
2.75	2.5	1.75	5.75	4.25	4.75	1.5	9	5.75	27.25	2	6	2.25	5.75	3	5.5
3	3.25	4.5	4	2.75	3.5	2.75	5.5	3	22.75	1.5	7.75	2	5	3	4.5
6	1.25	2.75	5.75	0.75	3.25	0.25	6.5	5.25	15.5	1.5	10	3.75	2	4	3.5
2.25	2	1.25	6.75	4.5	4.75	1.5	3.75	5	17.5	2.5	6	2.5	2.75	1	5
3.75	1.5	1.25	6.5	1.5	3.25	0.75	5	2.75	17	1.5	10.5	2	1.5	1	2.75
2.5	1.25	1.75	2.5	3	3.75	0.25	5.5	1.25	10.25	1.25	6.25	3	1.5	2.75	2
7	3.5	2.5	9.75	2.5	3.25	0.25	9.75	5.5	17.25	5.5	9.75	3	2	1.75	4.25
7	2.75	2.75	6	4	3.75	0.5	8.25	5.5	22.75	2.75	16.75	1.75	0.75	3	5.25
4.5	1.75	4.25	5.5	5.25	4.25	1	5.75	1.25	22.75	0.75	9.5	2.25	1.25	2	2.75
1.75	4.25	1.75	7.75	7.5	7.25	2	8	4.5	17.75	1.75	8	1.5	2	1	5.5
2.75	3.25	1.25	7.5	2.5	6	2	12.25	2	13.25	1.25	6.75	2.25	2.25	2.75	2.75
6.25	3.25	3.25	8.25	3.5	5.75	1	7	8	26.25	1	11	2.25	3.5	2.25	10
7.75	3	4.25	7	4.75	5.25	1.25	9.75	4.25	13.75	2.25	14.5	1.5	1.5	2.75	4.75
1.75	1.5	5	6.75	3.75	6	1.25	7.25	3.75	13.25	0.5	5.5	1.5	3.25	2.5	4.25
5.5	4.25	3.5	5.5	6.5	4	2.5	6	3.75	19.25	1.5	9.75	4.25	3.5	4.5	4
7.5	2.75	2.75	5.5	3.5	4.75	1	6.25	4.75	27.25	1.75	10.75	4.75	5	4.5	8
2.75	1	1.25	4.75	3.25	5.5	2.25	5.5	3	24.25	1	13.5	2	5.25	1.75	7
9.5	1.25	1.25	7.25	3	5.5	0.5	4.5	5.25	21.75	1.75	7.25	2.25	1.25	1	6.75
4.5	1.25	2.25	4.25	4	1.75	0.5	4.25	3.5	13	5	6.25	2	2	1.5	4.25
4.25	0.25	1.5	2.5	1.5	3	0	2.75	3.75	23	2	7.5	2.25	1.25	2	3.25
4	1.75	1.75	4.25	2.75	3.5	1.25	3.25	3.5	13.75	2.25	7.75	1	1.75	4.25	6.25
5	0.75	1.75	5.75	4.5	2	0.25	5.75	4	14	1.25	3.75	3.25	1.75	2.25	3
5.25	1	1.25	4.75	1.75	1.25	0	3.25	3.25	16.75	4.25	7	2.75	1.5	1	4.75
6.25	2	2.75	6.5	5.5	3.5	1.5	7.5	3.25	17.5	0.75	12.75	1.5	2	3.25	3.25
2.75	2	2	6	3	4	1.25	5.5	3.25	13.75	2	6.25	2.5	1	2	1.25
5.5	2.25	3	7	4.25	4	1	4	2.25	22.5	1.25	11.75	0.5	2	0.75	4.5
7	3.75	4.75	7.5	5.75	6.25	2.75	10.25	9.25	29.25	2.25	12.25	2.75	2.5	1.75	10.25
6.5	3.25	2.75	5	3.25	4.25	1.25	6.25	6.75	29.25	3	14.25	2.25	6.25	1	8.5
1.75	2	2.75	5.75	4.25	3.5	0.75	8.5	1.25	13.25	2.25	4.75	4	1.25	3	0.75
4	2	1.5	6.25	2.25	3	1.5	4.75	3.5	23.25	1.5	13.25	1.75	1.75	2	5
3.75	0	1	4	3	1.5	0	1.75	6	13.25	1.75	5.5	2.5	1.25	1.25	4.25
5	1.25	2.25	4	2.25	3.25	1	5.5	7.5	20.5	2.25	8	3.25	3	1.5	3.25
6.5	1.75	3.5	6	2.25	2.25	0	6.25	4.75	15.5	3.5	6.5	3.25	2.75	2.5	4.25
5	1	3	5.75	1	4.75	0.5	7.5	3.75	16.75	2	12.25	2.25	2	2.25	2
0.75	3	1.5	7.25	3.25	3.75	1	6	2.75	15	2	7.5	1.75	1	1.25	3.25
9.25	2	1.25	6.5	2.75	3.75	1	8.5	2.75	18.25	2.25	14	1.25	4.75	2.25	2
7.25	2.5	2	8.25	3.25	5.25	1	7	2.5	17.5	2.5	10	3.25	2.75	2.75	4.25
1.25	1.25	0.75	5.25	2.75	4.5	0.75	5.25	3	26.5	1	10.75	1.75	1.25	0.75	3.25
2.25	1.25	0.5	6	4.25	3.25	0.25	4.5	1.5	11	1.75	9.25	4.5	4.25	1.25	2.5
4.25	1.75	1	8	1.5	2.25	0.25	9	3.25	11.75	1.25	10.25	4.25	0.5	5	2.5
2.75	3	3.5	12	2.5	6	1.25	6.75	5	17.75	1.5	7	2	2.25	2.25	4.25
4.5	3	4.5	5.25	5.25	3.75	1.75	5.25	3	22	3	14	2.25	3.25	1	5.75
4.25	2.5	1.75	9	8	5.25	1.5	8.75	2.75	16.5	1.5	12	2	3.75	0.5	5.5
9.25	2.75	3.25	8.5	2.75	6	3	9.5	3.5	21.25	3.75	9.75	1.25	5	4.25	4.25
5.75	1.75	3.75	6	2.25	3.25	0.5	4.5	7.25	21	4	6.25	3	2.25	1	10.5
7.75	2.5	5	6.25	2	5	1.75	5	2.25	15.5	1.25	9.25	3	2.5	1.75	5.75
9	1.5	0.75	6.5	4.5	3	1.5	5	2	14.75	1.25	11.25	2.25	0.75	1	2.75
3.5	3.25	2.25	7.75	6	4.75	1.25	5.5	2.75	14.75	5.5	6.25	1.75	4	1.25	3.75
4.25	1.75	3.25	3.25	4	4.5	3.25	4.75	5.5	23	1	7	1.75	2.75	0.75	6
2	3.5	2.25	7.25	9.5	5.25	2	7.75	2.75	12.25	1.25	14.5	1.75	0.75	1.25	4
4.75	4	4	10.75	3.25	4.25	2.75	11.25	4.75	16.75	3	8.75	3.75	4.25	3.5	3
4.5	1.25	2.75	3	2.5	3.75	1	6	4.75	22.75	1.5	11.25	2.5	2.75	1.25	5.25
4	3.5	1.75	8.5	3.5	6.75	1	8	3	22	2.5	8.25	2	2.25	1	4.75
3	1	2.5	2.75	0.25	2.75	1.5	7.25	5.25	23.25	1.5	7.75	3	3	1	8.25
4.5	0.75	2	5.25	2.5	1.5	0.25	5.25	8	22.25	1.5	8.5	2.25	3	0.5	6.75
5.75	2.5	0.25	8	7.75	3.75	1	5.5	3.75	11.75	2.75	15.75	3	2.25	1.75	4.75
5	1.75	3	3.75	5.5	2.75	1	5.75	1.5	16	0.25	8.25	2.25	1.75	2.25	2
6	3	5	7.75	5.25	5.75	1.75	8.25	5.75	24	1.5	11.25	3	1.75	2.5	4.5
5.25	3.5	2	5.75	3.75	5.5	2.25	7.5	2	23	1.5	12	1.5	2.5	1.5	4.75
5	2.25	2.5	8.25	3	4.75	1	8.75	3.5	12.25	2.25	6.5	4	0.75	5.25	3.25
3.25	1.5	2	5.25	5	4.5	1.75	8	2.25	24.5	3	9.25	2.25	1.25	1	4.75
4	5	3.5	6.5	6	9.75	2.25	7.75	3.25	21.5	2	14.5	2.75	4.5	2.5	8.5
8.5	2.5	3.25	6.5	3.5	6.5	0.75	8.25	3.75	25.75	2	9	1.5	1.75	0.75	3.5
4	1.75	1.75	5.5	1.25	2	1.5	8.5	1.25	28.25	2	12.25	1.5	1.5	1.5	5
2	3	3.5	11	4.25	6.25	1.75	12	3.25	15.75	1	6.25	4.5	2.75	2.75	2.75
6.75	4.5	6.25	7.75	6.25	6	3.25	6.25	4.75	12.75	0.5	12.25	1.25	1.5	1.75	5
7.75	3.5	4.5	6	3.5	5.5	1.5	8.25	3	14	3.75	9	2	2.75	0.75	2.25
3	2	4	4.5	3.5	3.25	1.5	5.5	4	14.25	2.75	6.25	2	2	1.5	7.75
3.25	0.75	1.5	5.5	2	3	0.75	5.25	2.75	11	3.75	5.75	3.25	1.75	2.25	4
2	0.75	1	5.75	1.5	2.75	1.25	5.75	4.5	18.25	1.25	12.25	3	2.5	1.5	0.75
2.25	1	1.5	7	2.25	2.5	0.25	7.5	5.25	21.5	1.75	11	3.75	3	1.75	2.25
5.5	2	3	13.25	3.5	5.25	0.5	14.25	3	19.25	0.5	12.25	4.25	4.75	3.5	3.75
3.5	2.5	1.5	12.25	1	4.25	0.25	7.75	4.75	20.25	3.75	9.75	1	2.5	1.25	3.5
5	2.75	1.75	9.25	2	3.75	1.75	6.25	2.25	15.75	4	11.25	3.5	1	3	2.75
1.75	2.25	2	5.25	4.25	3.5	0	7.25	2	19.5	1.5	7	1	3	1.25	7.25
4.25	3.25	2.25	8.25	6	6.5	1.5	10.75	3	26.75	2.75	10	2.5	9.25	1.5	7.25
5.5	1.75	2.25	5	2.5	5.5	0.75	5.25	5	24	5.25	7.5	3	3	0.75	8.75
1.75	2.25	2.25	4.25	2.25	2.75	1.25	5.75	4	16.5	1.25	8.25	2.25	2.5	1.25	7.25
2.5	1.25	1.5	9.75	5	5.5	1	6.25	1.75	11.5	2.25	12.5	2.25	1	1.25	2
4.5	1.5	3.5	5	1	2.5	0.5	4.75	2.75	19.75	1	7.5	1.75	2.25	0.5	5.5
3.5	1.25	0.5	5.25	3.75	1.75	1	7.25	3.5	15.75	0.5	7.75	2.25	2	1.25	3
10.5	5	5	11.75	5.25	5.5	2	10.25	4.25	27.5	5	10.5	1.75	1.25	1.5	3
5	1.75	3.5	6.25	3.5	3.25	0	7.75	6.25	20.5	1	8.25	3	3	1.75	5.25
4.5	3.75	6	10.5	5	5.5	2	9.75	2.25	15	1.5	11.25	4.5	1.75	4.5	2.5
3.25	1	3.25	7.75	5	4.5	0.25	7.5	5.25	19.75	0.5	12.75	3	4.75	1	4.5
3.5	1.25	1	3.75	2.25	2.25	0.75	5.25	3.5	20	3.25	5.25	1.25	2.5	2.25	7.5
3.25	1.25	1.25	5.75	2.25	2.25	0.25	8.75	4.75	14	1.25	9.75	1.75	1	2	2.25
10.5	2	3	6	4	3.75	0.5	5	4.25	21.75	3.5	7.75	3	2.5	2	6.25
2.75	0.75	0.25	5.25	1.5	2	0.25	6	5.75	21.75	0.5	4.75	2.75	3	1.25	5
2.25	1.75	3	5.5	4	3.25	0.5	4.5	4.25	13.75	3	5.5	3.75	0.5	0.75	3
4	2	1.5	10	3	6.75	1.25	5.5	3	18.25	4	7	2.5	2.75	3	2.75
6	1.75	3.5	5.25	3.25	3	0.75	4	4.5	21	1.75	11.5	2.5	1.75	1	4
5.5	0.5	4.5	4	1.75	2.5	0.25	7	4	18	1.25	8	2.75	2	2	6.25
5.75	3.25	2.25	8.75	4	4	1	8.25	1.5	15	0.25	5.75	2.25	1.75	2.5	2.25
4.75	3.25	2.5	9	4.25	3.5	1.5	6	2.75	16.25	0.75	10.25	2.25	4	1.25	4.25
3	2.75	1.75	6	3.75	4.5	0.75	6.5	3.25	20.75	1.25	10.5	2.5	2.5	1	4.25
5.75	2.25	4	7.25	3.25	4.25	2.75	6	5.25	21	2.75	7.5	2	3	3.25	5.25
4.25	2.5	3.75	8	5.5	4	2.25	7.25	4.25	19.5	1.75	10.25	2.75	5.25	2.5	3.75
3.75	2.25	3	5.75	3	4.25	0.75	4.25	3.25	17	1.25	10.75	2.25	0.75	1.75	4.75
2	4	1	8	4	5.75	1.75	9.25	3	9	1.25	7.75	3.5	2.25	3.75	2.25
5.5	2.75	3	3.75	5.25	3.75	2	6.75	4.25	25.25	3.5	11.25	1.5	2.5	2	4
1.25	1.75	2	3	3	2.5	0.5	8.25	1.5	19	1.25	4.25	2.25	2.25	1.5	2.25
2.5	3.5	1.5	9.75	2	4.75	0.25	9	2.5	27.25	3	5.5	3.75	3.5	2.5	4.5
9	2.75	4.5	8.25	3.75	5.25	2.5	6.25	6	19	2	10.5	4.25	3.25	4.25	5.75
5.25	2.5	3.5	4.5	3.25	3	2	3.5	3	22	3.25	10.75	1.75	0.75	0.5	5.5
2.75	0.25	1.75	3	2.75	2	0	3.5	3.75	13	1.5	10.25	2	4	2.25	3
5.75	1.5	1.25	4.25	2.25	1.25	0	4	6	18.75	1.5	9.75	3	2	1	7.25
7.25	1.5	2.75	6.25	4.25	2.25	1	5.5	5	14.25	2	10	3.5	4	2.25	6.5
1.25	2	1.75	4.25	3	2	1	5	4.25	16.75	2	4.25	3.5	1	2.25	4.75
2.25	1.75	2.5	9.25	4	6.75	0.25	8.75	3.75	20.5	3	12.25	0.75	2.75	2.5	5.5
8.5	2	1.25	7.5	3.25	5.5	0.5	6.75	2	17.75	2	12	3	3.25	2.5	3.25
6.75	3	3.25	4.5	6	2.75	2.25	4.75	2.25	16	3.25	9.5	0.75	2.75	0.5	4
1.25	5	2.75	7.5	5	4.25	2.75	8.25	4	17.25	1	7.5	2	2	1.75	3
6	2.25	5.75	9.25	10	7.25	2.5	8.25	6.5	15.25	1	19.75	2.5	1.75	2.75	4.25
10	2.5	4.75	6.75	6.75	6.5	2.5	6.25	6.5	28	3.5	12	2	3	2.75	7.75
3.75	1.5	2.75	3.5	1	3.25	0.75	5.25	3	22.75	1.25	13.25	3	2.75	1.25	7.75
6.75	2.25	3.25	7.25	5	7	0.75	9.5	4	19.25	3.25	10.5	1.5	3.25	5.25	5.25
5.25	2	2	9.5	2.25	4.25	0.25	7.5	5.25	20.25	1.75	14	3.5	3.5	1	4.5
2	2	2.75	7	4.5	3.25	1.25	9	2.75	11.75	1.75	4.25	3.5	1.75	3.5	1.25
3.25	1.25	1	3.75	4.5	5.75	1.5	4	2.5	11.25	0.75	7.75	1.5	1.5	0.75	3.5
4.5	1.25	2.5	5.5	5.75	3.25	0.75	3.75	7.5	21	1.5	13.25	1.25	3	0.75	6.75
7.25	1.5	3.75	6.5	3.25	6.25	1	5.5	4	19	2.25	8.25	3.25	0.5	2.5	3.5
3	2.75	2.5	9.75	1	4	0.75	10	4.25	14.25	3	8	3	2	2.5	4
7.75	2.25	3	5.25	3	4.75	2	4.75	6	17.25	4.5	10.75	1	3	2.25	5.25
5.5	2.25	2.25	7	3.5	5.5	0.75	6.25	2.75	14	2.5	11.5	3	3.75	2.5	6.25
4.75	4.5	2	8.25	3.25	4	0.25	12	2.75	15.5	3.75	7.5	2.5	1.75	4.5	1.5
6.5	5	3.75	7	3.25	7.5	4	5	11	12.25	1	6.75	5	3.25	2.75	5.5
2.25	3.5	2	5.25	4.75	6.75	1.5	3.5	6.75	13.75	1.5	10.25	3	3.5	1.5	3.25
2.75	5	3	7.5	4	7	1.75	4	10.25	14.5	4.25	10.25	8.75	7.25	1.25	8.25
7	3.5	6.5	8.25	5.25	4.75	2	3	7.5	7.75	2	5.5	3.5	1.5	2.25	1.75
4	4.5	4	11.75	5.5	9.25	3.25	7	13.25	10.75	2	8.25	8.25	6.75	4.25	5.25
3.75	6.5	4.75	15.75	10.5	10.25	3.25	10	22	26	2.5	14.25	8.75	8.25	6.5	8.75
1.5	5.75	3	22.75	5.75	4.75	1.25	10	16	7.75	3	6.25	4.25	0.75	3.25	4.25
13.75	5.25	4.5	21.5	9	6.75	0.5	9.75	11	6.25	1.75	5.5	3	0.25	2.25	1.75
6.5	4.75	2.75	22.5	7.5	8.25	1	9	11.25	10	3.5	8	9.75	3.25	5.5	4.75
5.25	5.75	2	20.5	4.5	6.5	2	6.75	11.75	20.25	1.5	10	3	3.75	3.25	4
15.5	9	1.5	19.25	4.25	8.5	3	11.75	5.75	9	4.5	5.75	5	2.75	7.5	2.25
14	7.5	5.25	17.5	6	10.25	1.25	12.5	12.5	17.5	6.5	8.25	7.5	4	5.25	4.25
8.25	7.5	8.75	20.75	12.25	8.5	1.5	6.5	8	11.5	2.25	7.75	3.5	3.75	4	4.75
13	8	5.5	23.25	9	6	2.75	12.5	14.5	11.5	6.75	14.5	10.5	6.25	8.75	6.25
7.5	3.25	6.25	14.25	4	8.25	2.5	7	9.25	11.75	6.5	8	7.25	2.25	4.75	4.25
5.5	6.25	3.5	16.25	9.25	5.25	4.25	9.75	11	8	6	6.5	7	3.75	7	3.75
4.25	5	4.75	12.5	6.5	6	1.25	5	18.5	12.75	3.5	13.5	6.75	4	1.5	9
3.75	9.75	7.25	17.25	13.25	10.5	2.25	7.25	25.25	28.5	4	8.25	12	5.25	3.25	9.5
10.5	8.75	3.75	20.75	8.5	10.25	4.5	8.25	18.75	28.5	4.75	16.75	6.75	6.25	6	11.5
10	4.75	8.75	17.25	11.25	9.5	3.75	7	18.25	14.75	7.25	10.25	8.25	6.25	2.5	6.75
8.75	3.75	3.75	15.5	7.5	6.75	1.25	5.5	16.5	11.25	3.5	6.75	6.5	4.75	3.25	9.75
7	1.25	2.5	13.25	4.25	2	1	15.75	8.75	12	5.5	7.75	9.5	3.5	4.5	4.5
3.75	0.75	1.25	13	3.5	4.25	0.5	10.75	6.75	12.75	3	8	3.75	3	4.25	4
1.5	2	1	7.25	3.75	2	0.25	8	4.75	12.25	4.5	3.5	6.25	0.75	2	2.75
2.75	3.5	2.75	10.5	4.25	0.25	0.25	10.75	2.75	15.25	3	9.5	6	1.25	2.5	3.75
6.5	2.5	3.25	6.75	3.75	3.75	1	5.75	9.75	28.5	8.5	12.25	4	4	2	10
3.5	1.75	0.75	12.75	3	4.75	0.5	6.5	3.75	14.75	2.75	4	3.5	1.75	3	5.5
11.75	2	5.5	7	2.25	5.25	0.25	7.5	7.5	29.25	8.25	9.25	5.25	4.25	1.75	12.5
1.25	2.5	2.5	8	2.25	3.5	0.25	8.75	6.5	12	2.75	6.25	4.75	1.25	2	3
5.5	3	0.75	7	1.5	2	0.5	7	4.25	13.5	2.75	4.25	4	2	3.75	5.25
5.75	2	0.75	8.5	3.75	5.75	0.25	7	3.5	11	5	3	2.75	1.25	3.5	1.25
4.25	3	0.75	7	1.5	3.75	0.5	6.25	2.25	25	0.75	9.25	3.75	2	1.5	5.25
2.75	1.75	2	9.5	2.25	4.75	1.25	4.5	5.75	17.25	2	10.75	1.25	1.25	2.5	2
20	3.25	7.5	6.25	7	6.75	1.25	12.25	5.75	23.5	3	14	3.75	4.25	5.75	6.5
3.25	1.5	3.25	7.25	3.25	2.25	0.5	10.75	6.25	17.5	2.25	7.25	4.5	1.75	2	3
1.75	3.75	1.25	6	2.5	4.25	1.5	7.5	2.75	20	1.25	11.75	1.75	1.75	0.75	4
8	1.75	3.25	9	2.5	3.75	1.25	4.75	3.5	10.75	2.25	4.5	1.5	1.25	2	1.5
5.75	2.5	4.25	7.25	2.25	4.5	1.5	3.5	6.5	26.25	1.5	5	5.5	1.5	1.75	6
9.25	3.75	2.75	7.5	7	6	0.75	9.75	9	14.75	2.5	14.75	4	4	4.25	3.5
6.25	3.5	7.25	6	4.25	7	1	8	7.5	20.25	4.75	8.25	1.75	3.5	2.5	7.25
3.75	3	2	3.5	4.5	6	1.75	5.25	4.75	31.75	5.75	16.75	4	4	1.75	9
3.5	3.75	1.5	8.75	3.25	4.5	0	10.75	4	20.75	1.75	8.25	3	1.25	1.25	3
2.5	1	0.75	3.5	2	2	0	5.5	3.5	12.25	2	11.5	3.25	1.25	0.75	3.25
5.5	1.5	2.75	8.75	3.25	2.25	1	13	6	21.25	1.75	16	6.5	3.5	5.5	2.5
2.75	2.5	0.5	8.25	3	2.5	1.25	7.75	2.25	15.25	1.25	5.5	4.5	1.5	2.75	2
1	1.5	0.25	7.25	1.75	2.25	0.25	8	3.25	17	0.25	10.5	2.5	1.75	0.75	2
1.5	1.75	1.25	11	2	2.75	0.5	14	2.75	19	3.25	10	4	1.25	2.5	2.75
2.25	2.5	2.75	9.5	4	5.25	1	7	2.75	18	4.5	6.5	3.75	3.75	2.25	4
6.5	1.75	4.25	8.75	0.75	4.75	0.75	5.75	10.25	26.75	2	11.5	6	3.5	1.25	8.25
4.75	2.75	2.5	6.75	3.5	4.75	1	8.5	5.5	19.25	2.25	8.5	2.5	3.75	1	7.5
2.75	2	1.75	6	6	3.75	2.25	6	3	26.25	1.5	4	2	1.75	1	3.5
4	2.25	1.5	5.25	2	3.5	0.25	8	4.25	10.75	1.5	6.5	4.25	0.5	1.25	1.75
2	1.75	0.25	9	1.75	3.75	0.5	7	4.5	16.25	2.5	12	4.5	0.5	2.75	3.25
3.5	3	1.5	7.25	4.5	3.25	1.25	6.5	2	15	3	11	2.25	1.25	1.75	2
7.5	2.25	2.5	5.75	4.25	3.5	1	5.25	4.75	19	5	6.5	2	4	1.75	3.5
7.25	2.25	3.5	3.75	2.75	3	1.75	7.25	4.75	22.5	3.25	6.25	3.75	4	1	6
6.25	2.75	1.5	7	3	3.25	0.25	5.25	5.75	24	4.5	6.5	2.25	2.5	2.5	7
3.25	2.25	2.75	6.5	1.75	5	1.5	7.25	1.75	24	2	8.25	1.75	0.75	2.5	3
5.75	1	3	5.25	8.25	7.75	1.25	5.25	4.25	9	1	15.75	3.5	2.5	3.25	3.75
3.5	2.5	1.25	6.25	3.5	4.25	1.25	8.75	3.5	16.75	2.75	8.75	2.75	3.5	4.5	2.75
4	2	1.5	5	2.75	4.5	1.25	5.25	6	11.75	1.75	7.25	2.75	1.5	2.75	6
1.25	1	1.25	3.5	1	2	0.25	4.75	5.5	20.75	1.5	5.5	1.5	2	1	5.5
2.75	3	1.75	6.25	3.75	4	1.5	7	5.75	33.25	2.75	8.25	3	3.25	0.75	6
5	2	2.5	6.5	2.5	4	1.25	8	3.75	14.75	0.5	14.25	1	2	4	2
4.5	3.25	2.25	5.5	3	5	1.25	6.5	1.5	13.25	2.75	7.75	3.25	2.75	5.75	4.25
5	3.75	2.25	6.75	4.25	6	2	8.25	2.5	12.75	0.25	10.75	2	1	2.25	4.25
3.5	1	2.5	6	1.5	3.25	0.25	6.25	3.25	17.25	2.25	5.75	1.5	2.75	1.75	1.75
3.25	3	2.5	5.25	2	3.75	1.5	5.5	3.5	20.5	1.75	9	2.25	1	1.25	4.5
5.25	4	1	7.5	2.75	6.25	1.25	9.5	2	13.5	1.5	7.25	5	1.5	1.75	2.25
6.5	1	2	6.5	6.5	4.5	1	5.5	4.75	14.5	2.25	11.25	2	2.5	0.5	5
1.25	1.5	1	4.75	5.5	5.25	1	4.75	4.75	18	1.5	10.25	4.25	3.25	2.25	8.5
4	1.25	1.5	4.5	1.75	5.25	0.5	5.75	10.25	22.75	2.5	9.25	4	4.5	0.75	8.5
3.25	1	1.75	4.75	1.5	4	0	6.75	2.5	14.5	3.25	5.75	2.25	2	1.5	5
2	1.25	2	4.25	3.5	3	0.75	6.5	2.75	9.75	3	5	2	1	1	4
6.25	1.5	4.25	3.5	2.75	7.75	0.75	2.25	5.5	24.25	1.25	11.75	1.75	1.75	3.25	6
4.25	2	1.25	6.75	1.5	3.5	1.5	8.5	4	13.75	2	7	1	1	3.25	1
2.25	2	0.75	5.25	3.25	3.25	1	6	4.5	17	1	5	2.25	1.75	1.25	3
3.75	0.75	0.75	5.75	3.5	2.75	1	11.5	4.25	24.25	2	14	3.75	6.25	2.75	2.25
5.75	2.5	1.5	9.75	3.5	4.25	1	8.5	5.75	29	0.5	12.75	4.25	2.75	2.75	4
9.25	3	3	17.75	2.5	5.25	1	12.75	6	22.5	2	21.75	4	1	4.25	1.75
18	4.25	4.25	21.5	4	4.5	0.75	15	8.75	7.25	5	21	5.5	4.25	7.25	4
9	4.5	3.5	16.75	5.25	4.25	2	14.75	14.25	22	4.75	18.5	10.5	4.25	5.75	3
1.75	1.5	1.75	11.25	2.75	4	0	10.25	12.25	8.5	1.5	8	3.5	1.25	1.25	1.5
5	1.25	0.75	12	2.5	4	0.25	5.5	6.75	18.25	2.75	7	4	3	0.75	6.75
1.5	1.5	0.75	9.5	1	2.25	0	11.25	5.25	12	3.25	10	2.25	2	0.75	7
4.25	0.75	0.75	10	2.25	3.25	0.25	8.5	1.75	24.75	5.75	4.75	1.5	0.75	1.25	4.25
2.75	1	0.5	12.25	4.5	2.5	0.5	4.25	5.5	10.75	2	15	4	1.5	1	1
4.25	1	1	7.5	1	2.25	0.5	5.5	3.25	19.25	0.75	7.5	2.25	1	1.5	3.25
4.25	1.25	4.25	7.75	0.5	2.5	0.75	9.25	8.25	19.5	3.25	9.5	3.25	2.25	6	5.75
4.25	1.75	1	6.75	2	5	1.25	7	8.75	14.75	3	8.75	3.25	3	1	4.75
4.75	4.25	4.75	8.25	2.75	2.5	1.75	4	5	16	1.25	9.75	2	0.75	1	4.5
2	4	1.25	9.25	4	4.25	1	13	3	11.75	0.75	3.5	4.25	2.75	3	1.5
2.75	3.25	3.25	8.75	4.25	4.75	1.5	5.25	4.25	23	1.75	11.25	3.25	3.5	1.75	8
2.25	2.75	4.75	6.5	1.75	3.25	0.75	6.5	2.25	11.75	1.25	6.5	2.5	1.25	4	2
2.75	1	1	4.75	2.75	2.5	1.25	6.75	6.5	15	1.75	9.75	3.75	2.5	1.75	6.5
5	0.75	1	7.75	5.25	6	0.75	6.25	3.5	19.5	0.5	22.25	1.75	0.75	1.5	3.5
2.75	3.25	0.5	9.25	6.75	6	1.25	8.25	4.75	22	1.75	11.5	2.25	9.25	3.75	4
1.75	3	2	5.25	4.75	5.25	2.5	8.25	3.25	19.75	2	5.75	2.25	1	3.25	3.5
5.5	4.75	1.5	7.25	4.75	4.25	2.25	9.75	4.75	20	3	6.25	2.75	2.5	1.75	3
9.25	2.25	3.75	5.25	2	3.5	0.75	4.5	14.5	25.75	2.75	14.75	3.75	5	1.25	12.25
2.5	2.75	2.75	4.5	3.5	6.75	2.5	6	5.25	12.5	1.75	6.25	4	2.25	2.75	2.25
4	1.75	1.75	4.25	2	5	0.75	5.25	3.25	20.75	0.75	14.5	3.5	2	1.25	8.25
7.75	1	2	7.25	2	5.25	1.25	5.5	1.5	11.5	2.25	12.25	2.75	0.75	1.75	2.75
1.75	1.75	3	5.75	6.75	5.25	1	5.25	4	20.25	1.75	6.75	2.75	2.5	1	7
10.5	0.25	3.5	3.5	2	1.5	0.75	3	4.5	21.25	2.25	8	2.25	4	1.75	6
5	1	0.5	2.75	1.5	1.75	0	5.5	2.25	8.25	3.25	3.25	2.75	1.25	1.5	3
3.5	3.5	4.25	8	2.5	5.75	1.5	6.75	2	13.75	1.75	8.5	4.25	2.25	2	5
4.75	3.5	2.25	7.5	5.75	5.25	1	7	2.75	13.25	3	14	2.5	2.75	1	2.5
4.25	2.5	1.5	7.5	2.25	6.25	2.5	6.75	3.5	29.25	0.25	10	1.75	2.5	0.5	3.25
7	3	2	8	3	3.5	2.25	9.5	4	14.5	2.5	4.75	5.25	2.75	4.75	3.75
3.75	3.75	5.5	8.25	3.75	5.25	2.75	6.25	7.75	26	1.25	9.25	3.5	3.75	2.5	11.25
4.25	4	3.25	9.5	3	5.5	2.75	7.75	7.25	19.75	3	9	3.25	3.75	3	7
3.75	1	4.25	5.25	2	3	0.25	3.25	2.75	17.75	0.75	12.25	1.75	3	1.5	4.75
3.25	1.5	1.5	5.25	1.25	5.5	0.5	5.5	1.75	12	2.5	6.5	1	2.5	1.75	1.75
2.5	1.75	1.75	7.25	3	4.25	0.75	7.5	2.5	14	3.75	6	1.25	1	1	2.25
3	0.5	0.5	3.75	2	2.5	0.5	4.75	3	19.25	1.5	8	1.25	0.5	0.75	2.25
3.25	1.5	0.75	6.25	2.5	4.25	0.75	5.5	2	11.5	3.75	7	2.25	1	5	3.75
2.25	1.5	1.5	10	5.5	3.25	0.25	6.75	4.25	16.25	1.25	15.25	3.25	2.25	0.25	6.5
5.75	2.75	3.5	13.25	6.25	3.75	1	7.75	1.75	16.75	4.5	14.25	1.75	1	1.5	2.5
3.75	1.5	2	2.75	3	3.5	0.25	5.25	7.75	20.75	0.25	8.5	2	5.25	0.5	8.5
8.5	2.75	5.5	4.25	1.5	2.75	0.25	6	9.5	24.25	4.25	8.75	4.25	3.5	0.5	8.5
1	2.25	1.75	8.75	3.75	4	1.25	7.75	1.5	14	1	7	2.25	2.75	2.25	3
6	2	2.25	9.25	3.75	2.75	2	6.25	2.5	17	2.75	11.75	2.25	3	0.75	3.25
2.5	1.25	4	6	2.5	2.75	1	8.75	2.75	20.25	3.25	6.25	3	3.75	1.75	3.5
4.25	2.5	4.5	3.5	2	4.5	1.5	3.5	4.75	18.75	3.25	10.25	2	1.75	1.75	6.5
4	3.5	2.5	6.75	2.75	3.75	2	5	3.5	17	1.5	6.25	2	3.25	1.75	5.5
4.5	3.75	3.25	7.25	1.75	4.25	1.5	8.25	2.5	11.75	1.5	10.25	1.25	1	2.25	0.75
5.5	3	2.75	3.75	4.75	3	1.25	6.75	3.25	18.25	1.5	12.75	0.75	2.5	1.5	4.5
3.75	2.5	1.25	7.25	4.25	5.5	1.25	6.25	4.5	16.5	0.75	7	3.25	2.5	3.25	5.5
2.75	6	3.75	8	4.25	7.25	3	9.25	4.75	15.75	1.5	7.25	2.25	2	2	3.5
5.5	2.5	2.75	7.25	6.75	5.75	1.25	5.75	4.5	21.25	1.5	8.5	3.75	3.75	2	2.5
4.75	0.25	2.5	9.5	7.75	6.5	1.5	8.5	7	16.75	2.25	19.5	4.25	4.75	2.5	7.75
6.75	1.75	1.75	7	4.25	5.75	1.75	6.25	6	18.25	2.5	7	2.5	1.25	2.75	6.25
1	2.25	1.5	5.75	1.75	4	0.75	4.25	4.5	24.75	1.25	10.25	2.25	3.75	1	8.75
2.25	2.75	2	3.75	4	4.5	2	5.75	2.25	14.5	1.5	8	1.5	2.25	1.5	2.25
5	2	4.75	5.5	3.5	4.75	1.5	4.75	2.25	19.5	4	3	1.75	1	1.25	6.25
7.5	4.25	3.75	8.5	2.75	4.25	2.25	8	2.25	17.25	4.5	11.5	3	1.75	3	4
2.75	3.75	3.75	4.75	5.25	4.25	2.5	7.25	3.75	22.75	2.75	7	1.25	2.5	1.5	6
1.5	1.75	3.25	7.25	6	4.25	2.75	9.25	2.25	18.25	0.75	8.25	4.5	1.25	4.75	3.5
6.25	4	3.5	7.25	4	5.75	2.25	8	3	22.5	0.5	10.5	1.75	2.25	2.5	5
4.25	2.75	3	7.25	4.5	3.75	0.5	8.25	4.25	19.25	1.75	9	2.75	4.5	4	5
13.25	3.25	4.5	5.75	3.75	5	2.25	5.5	7	24.5	3	9.25	1.5	2.5	2.25	7.5
1.5	1.75	0.5	4.5	0.5	1.75	0.5	3.5	3	15	2	9.25	2.5	2	0.75	6.75
3.75	2.5	0.5	5.75	4.5	1.5	0.5	9.25	1.5	11.25	0.75	5	2	1.75	4	2.25
4	0.75	2	6.5	1.75	2.25	1.5	4	2.5	14.25	1.75	6.25	0.25	1.75	3.25	3.75
3	1	3	6	0.75	5	0.5	8.5	5	11	0	9	3.75	1.25	3.75	1.5
2	1.25	0.75	5.5	5.5	1.75	0.25	7.25	2.75	17	1.5	11	2.25	0.5	1.25	2.5
2.75	1.75	1	9.5	4	5.5	1.5	5.25	3.75	21.75	1.75	16.25	1.5	1.5	1.25	6.75
5.5	2	3	5	4	3.75	0.25	6	6.25	20.25	0.5	11	3	0.75	0.5	5.5
3.5	2.25	1.5	4.75	2.5	4.75	1.75	3.75	7.5	21.25	3	7.75	2.5	3.25	2.5	6.75
4.5	2	3.25	4	3	4	1.5	5.5	1.75	17.5	2.75	6.75	1.75	1.75	1	3.5
3.25	1.5	4	8.5	3.25	3.5	1.75	8.25	4.25	18.25	0.75	10	2.25	0.75	0.75	1.25
4	2.5	3.5	7	8.5	9.5	0.75	6.5	2.5	8.75	0.5	8.25	1.75	1.25	4.5	0.5
9	3.25	4	8.25	3.75	4.5	2	8	4.5	24.25	0.75	7.75	3.5	1.25	2.25	3.5
2.25	3.25	4	6.25	4.5	3.75	2.25	6.5	2.75	17.5	1.5	6.25	2	2.75	1.25	6.25
5.5	2.5	3	5	3.25	3.5	2	7	7	18.75	3.5	6.75	3.25	3.5	1	9.5
3.5	0.75	1	6	1.25	4	1.25	4.75	3	8.75	2.25	7.75	0.75	1.75	2.5	2
1.75	1.5	1	4	3	2.5	0.5	6.5	3.5	23.25	1.5	8.25	4	3	2	4.5
3.5	3.75	1.75	7	3.5	4.75	2.5	6	3.75	15.75	2.5	7.75	1.25	1	3.5	2.25
7	2.25	3	5.25	4.75	4.75	1.25	2.5	5.25	25	3	8	1.25	1.25	0.5	7.25
3	3	1.5	4.5	3.5	3.25	0.5	3.25	4.5	20.75	2.5	11.25	1.75	1.25	1.25	2.25
6.75	2.25	3	7.75	4.25	3.75	1.75	8.5	3	15.25	0.5	8	1.75	1.25	2.75	2
3	4.5	2.25	6.25	3.75	8.5	3	6.5	4.75	28.5	2.25	11	2.25	3	1.75	6.25
4	4.25	4	6.5	4.75	6.75	2.25	7.5	4.5	15.75	2.5	12.75	3.75	4	1.25	2.75
4.5	3.25	1.5	7.75	6.25	5	1.75	8	3.75	18.75	1.25	15.25	2.25	1.25	1.5	2.25
4	2.75	1.25	6.25	1.25	5.5	0.75	3.75	6	19.5	0.25	8.75	1.75	2	0.75	4
2	0.75	1.75	7	1.75	3.75	0.25	4.5	6.5	14.25	1.75	4.75	2.75	1.75	0.75	7
7.25	1.75	2.75	7.25	2.25	2.75	0	8.5	6	20.5	3	7	4.75	1	2.75	5.5
2.5	3.25	2	10.75	4	4.25	1.25	9.25	4.5	16.75	3	4.75	1.75	1.25	2	2.75
6.5	3	2	5.75	3.25	3.75	1.25	11	3.75	16	0.5	8.5	2.75	0.5	3.75	3.5
14	2.25	5	7	5	7	1	9.5	4.25	18.25	3.25	10	2.75	8.25	3.25	6
7.5	1.5	1.25	8.5	4	2	0.75	4.25	5.5	21.75	2	12.5	3	1	0.75	5.25
3.5	2.25	1.25	6.25	4	3.75	0.25	6	1.5	13	2.25	10	1.75	1.5	2	3.75
0.75	1.75	1.75	5.5	1.5	1.75	0.75	5	2	24.25	2.5	10.75	2.25	2.5	1.25	7
4.5	1	2.25	4.75	2	3.75	0.5	5	3.75	23.25	3	7.75	2.75	1.5	1.25	5
2.25	1.5	1.75	8.5	1.25	3.25	0.5	7.25	4.75	20.25	4.75	6.25	2.25	2.5	2	3
6.75	3.25	4	7.25	3.25	4.25	1.75	6.25	5.75	23	2.75	13	1.75	10.75	2	5.25
7	2.5	4.75	3.75	3	6.75	1	4.75	6.25	18.5	1.25	13.5	1.5	1.5	1	6
0.75	2.25	2.75	5.75	3.75	4.75	2	8.75	2.75	13	0.75	7	3	1.75	2	2.25
5.75	4.75	3	10.25	3.5	5.5	2.25	11.25	3.25	20.75	2.75	12.25	2.25	2.25	4.25	2.25
7.75	4	5.5	9.75	5.5	7.25	5.25	8.75	4.25	14.25	1.75	8.5	2	3.25	1.25	4.5
3	2.5	4.5	5	4.25	6	2.5	4.5	3	19.25	2.25	17	3.25	2.25	1.75	5
1.5	3.25	2	7.5	5	4	0.75	8.25	2.75	14.25	1	2.75	4.25	1.75	3.75	1
3	3.75	2.5	8.25	1.75	4	1.75	5.75	5.75	23.5	0.75	14.25	3.25	2.75	1.25	5
3	2.5	4	6.75	2.5	6	2.75	8.25	3.5	22.75	3	8.5	2.5	1.75	2.5	5.75
1.75	4.25	2	8.25	2.75	2.75	0.5	10.75	4.5	13	0.75	5.25	5	2.25	2.25	1.75
5.5	3.75	3.5	8	4.75	9.25	1.5	6	7.75	23.25	2.75	8.25	2.25	5	0.5	10.25
6	3.75	1.75	11.25	2.75	8.5	2.5	3.75	10.75	22	3.75	7.5	2.75	3.5	1	6.5
6.25	0.75	2.5	6.25	0.75	3.5	0.25	1.5	4.5	13	3	8	3.25	2.25	1.25	3
0.75	1	0.25	7.5	3.25	2	1	5.5	2.25	12.25	3.25	6.75	2.5	1.5	2	1.75
3	0.25	0.75	10.5	2.5	3	0.5	8.5	2.5	21.75	3	7	2.5	1.25	2	3
1.75	0.75	2.25	8.75	1.75	3.75	0.75	9	6.5	19.5	4	12.25	2.5	6.75	1.5	4
8.25	2.5	1.25	9.5	4.5	6	0.25	8.5	4.5	15	2.5	14.75	3	0.5	3	3
6.25	1.75	4.5	7.75	2	3.75	1.25	6.25	5	24.5	4.25	10.25	2	0.5	0.75	7
5.5	1.75	3	4.75	4.25	2.25	2	6.5	1.5	16.75	0.5	8	0.75	0.75	0.75	3.75
1	1.25	1.25	6.75	3.75	3.5	1.5	6.5	4	11	0.25	7.5	2.5	2	1	7
1.5	2.25	1	4.75	4	3.75	0.5	7.5	2.5	15.75	2.5	4.5	4	2.75	0.75	5.25
6.25	4.75	1.5	9.5	4	3.75	0.75	8.75	3.5	20	2	6.25	2	3	1.5	2.25
4.75	4.5	5.75	8.25	6.75	8.25	3.5	5	5.25	21.75	2	9.25	2.5	3.5	2	8.75
5	2.25	3.75	9.25	2.75	5	2	10.5	3.75	22	2.25	12.5	2.25	0.75	2.75	3.25
5.5	4	4.25	9.25	6	7.25	1.75	7.5	6.5	25.5	2	14	3.75	2.25	3.5	5.25
2.25	3.25	1.5	4	2.75	3.5	1	5	11.5	19.5	0.75	6	3	4	1.75	8.25
1	2.5	2	8.25	2.25	4.25	0.75	7.75	2.5	16	2.75	9	2.25	2.25	2	5
6.5	3.75	4	5.5	4.25	5	2.75	5.25	3.75	19.25	0.5	8.75	1.75	2.25	2	3.5
11	5.5	4.25	7.75	3.75	4.5	2.75	5	10	27.5	4	13.75	2.5	2.75	1	9
7	5	1.5	4.75	1.5	5.25	0.75	6	2.5	15	2.25	13.25	3.25	1.25	2.75	3.25
2.75	1.25	0.75	7	1.25	3	0.5	2.5	3.25	9	1.75	9.25	1.75	1.25	1.5	2.25
3.75	1.5	0.75	7.5	2	4.5	1.25	6.25	4.5	17.5	2.5	7	2	1	0.25	3
1.5	3.75	0.25	6.5	1	1.5	0.75	8.25	2.75	18.75	1.75	8.25	3.25	2	3.25	1.75
5.75	1.75	1.5	12.5	5.25	6	0.25	7.75	3	14.5	0.75	11.25	1.75	1.75	1.25	1.75
11.75	2.5	1.75	8	3.75	3.5	0.25	8	4	13.25	2	9	2.25	3.75	2	4.25
9.75	3.25	2.25	8.25	1.75	5.5	1	6.5	3.5	20	2.5	11.25	2.75	1.5	3.25	6.5
1.5	2.75	3	5.25	3.75	5.75	1.5	7.5	4.25	23.75	1.75	6.75	2.75	2.5	0.5	5.25
1.25	2.25	2	4.75	2.25	3	1	5.75	2	21	0.5	12.25	1	0.25	1	4.5
1	3	1.75	4.75	3.25	3.25	1	7.75	4.25	13	1.5	5.25	2.5	1	1.75	3.5
4	3.25	5.25	10.5	2.25	5.75	1.5	8.25	2.25	30	1	18	1	2.5	2.25	5.5
8.75	3.5	4	5.25	2.75	3.25	1.25	5	9	22	3.5	13	1.5	4.25	1.25	9
2.5	2	0.5	6	3.25	1.75	0	6.25	2.75	14.25	1	8.25	2.5	0	1.25	2.75
9.5	4.75	3	8.5	3.5	4.75	0.75	5	2.25	18.75	2.25	11.5	3	1.5	4	3.25
5.25	1.75	3.75	6.25	1.75	5	1	7	3	30.25	0.75	11	1.75	3.25	0.5	7.75
2	3.75	1.75	6	3.5	5.75	2.25	12.5	6.5	14.75	2.5	7	5.25	1.5	2.25	2.5
3	3.25	1.75	5.25	4.5	6	2	5.25	4	20	0.25	6.75	1.25	4.5	1	3.5
2.75	1.25	1.25	9.25	1	6	3	2.5	5	22.25	3.75	14.25	2.75	1.75	0.25	3.75
3.5	1.5	0.75	5	1.75	0.75	0.75	4	3.25	17.75	3	8	2.5	2	1.5	3.5
7	1	2.75	17	1.25	4	0.5	14	6.75	16	1.5	12	5.5	3	7.25	2
5	1.5	0.5	10.25	0.75	2.75	0.25	8.5	5	12.25	1	10	2	1.5	1.25	1.25
7.5	2.25	4.5	13.75	3	6	1	14.75	4.25	8	1	13.5	5	3.75	4.25	2
1.25	3.25	1.25	12	1	2.25	0	8.75	5.25	19	0.5	8.5	5	2.75	1.75	5.75
8.5	2.75	2.25	10.75	1.25	2.5	1.5	8	6.25	25.25	3.75	14.25	2.75	4.25	2.25	7.25
7.25	3	2.25	6.25	2	3.5	1.25	6.25	4.5	22.25	3.75	10	2.25	1.25	2.25	4.25
4	2	2	9	2.5	5.25	0.25	7	1.25	17	2.5	7	3.5	1.25	2.75	1.5
4.25	2.75	2.5	13.25	10.25	6.5	0.75	6.25	6	15	2	8.25	2.25	1.25	0.5	2.5
8.5	4	2.75	7.75	3.75	10.5	1.75	8.5	2.25	17	1.75	13	1.5	3.75	0.25	4.75
1.25	2.5	2	4.5	3.75	3	1.75	6.25	4	20.75	1.5	12.5	1.75	1	0	4.5
4	3	2.5	6.75	2	3.25	1.75	9	5.75	16.5	2.25	8.5	2.25	2	4.5	3.5
8.5	3	3.25	11.25	2.5	5	1	13	7.75	21	3	8	6.5	1.75	3.5	2.75
3.5	1.5	0.5	7	1.5	2.5	0.5	6.5	3	13	1	8	4	0.75	0.5	3.25
2.5	2.5	1.25	5.5	1.25	2.75	0	9.5	5.25	19.75	3.5	7.75	4	2	2.5	4.75
6.75	3	2.75	10.25	7.5	3.75	2.25	6.25	3.75	15.75	2.75	11.5	2.5	1.25	3.25	4.5
3.25	2.25	1.75	7.75	2.25	3	1.25	5.75	3.75	23.25	3	7.5	2	2.25	1.75	5.5
6.5	1.5	2.25	8.25	3.25	2.5	0.75	7	4.5	14	2.5	9.75	2.25	0.75	1.25	5
7.5	1.75	2.25	8.75	4.75	4.75	1	8.25	4.75	13.25	1.25	9.75	1.5	3	1	2
5	2.5	3.5	7.25	2.5	3.75	0.5	5.5	6.5	17.75	2.75	9	1.5	1.75	0.75	8.75
1.25	1.5	1.75	6	2.25	2	0.25	7.5	3	11.25	1.75	12	2.75	1	0.75	3.75
3.25	2	1.25	5.5	1	4.75	0.5	4.5	1.25	13.75	2.25	6	3.5	2.5	1.75	5.75
9.5	4.75	5	6.25	2.25	6.25	2	6.25	5.5	30.25	3.75	13.25	3	7.75	1	7.25
4.5	3.25	3	10	3	8.5	2.5	7	4.25	10.5	1.5	7.5	2.25	2.75	2.5	3
4	3.25	4.5	11.5	3.25	8	1	9	4.25	19	2	10.5	2.25	3	3	2.75
5.25	2.75	4	6.25	3	8	1.75	6	9.5	28	2	9.75	3.25	4.5	2.25	7.5
1.75	2.25	2.25	5	4.25	4.25	1.25	5.5	3.25	13.5	1.5	9	1.75	1	0.5	4
5	4.25	4.25	6.5	3.75	5	1.25	6.75	4.25	16	1.5	4.75	2.25	1.75	1.25	1.75
3.5	1.5	2.25	10	3	2.25	1.5	6.5	3.5	28.5	2.25	11	3.75	0.5	2	3
4.75	0.5	2.5	13.25	1.75	2.5	0.75	13.5	6.25	20.5	1.75	14	5.5	3.75	5	3.5
12.75	2.75	9.75	22	8	9.25	1.25	18.5	7.25	21.5	2	16.5	6.5	4.5	8.25	2
1.5	1.25	1.25	11.5	0.25	3	0	3.75	2.75	15	0.75	8.75	2.5	0	0.75	2.5
1.25	1.5	1.75	9.25	2.25	2.75	0	11.25	1.5	10.25	2.25	4.25	4.25	0.5	1.25	2
4.25	2.75	1	17	1.75	4.5	1.25	11	6.75	17.25	5.75	8.25	1	3.25	0.5	6.5
5.25	1.75	3.25	8	1	3.75	0.5	6.25	3.5	22	1	10.75	2.5	2.5	1.25	7
3.25	2	3.25	10.75	4	6	0.75	5	3	18.75	1	14.5	4.5	3.25	0.5	4.5
2.75	3	2.5	10.75	4.25	4.5	1.75	10.75	5.25	14	2.25	9	1	1.5	2.25	3.5
10.75	2	4	3.5	3	4.5	0.25	6	6.25	24.75	4	8.25	2.75	3	0.5	9
4.5	3.75	1.75	7.25	3.75	3.75	0.75	7	3.75	10.5	1.75	11	1.75	1	3	0.5
3.5	5.75	4.5	10.5	4.5	5.5	1.5	10	3.75	9.5	4.75	9.75	5	3	2.75	3.25
5.5	3.25	3	5.75	4	6	2.5	4.5	3	18	2.25	8.5	1.5	3	1	1.75
4.25	3.5	1.25	7.25	2	4	1.25	6.75	5.5	14.5	1.75	8.25	4	1.25	3.5	1
2.25	3	3.75	8.25	3.25	6.25	2.25	7.25	4	31.75	1.5	13	2.25	7	2	8
2.5	3	3	6	1.25	4	1	7.25	9	21.75	0.5	7.25	2.5	4.5	0.25	9.75
5.25	3	3.75	9.25	4.5	6	2	6	7	14.25	3	8.5	3.75	3.25	3.25	6
8.25	2.5	2.75	7	2.5	4.5	1.25	9.75	2	15.25	0.25	8	1.75	0.75	2.25	1.25
4.25	3.75	3.5	6	3.75	5.5	1.5	8.25	3	20	1.25	6.75	2.75	1.75	0.75	4.25
6	2	1.75	8.25	4.5	5.5	3.25	5	1.75	13.25	1.5	8.25	2.25	0.75	1.5	0.5
2.75	3.5	1.5	6.25	2.75	6.25	1.75	7	3.25	22.75	3.5	10.25	1	0.5	3.75	4.75
5.75	3	5.5	5.5	3.75	3	2	4.5	5	26	2.5	9.25	3	4	1.5	5
3.75	3.5	4.5	13.25	3.75	5.75	1.25	7.75	1.75	17.5	1.75	11.75	2	1	2	2.75
8.25	3.75	4.25	8.5	6	4.5	1.5	9	3.5	21.25	4	11.5	2	1.5	1.75	4.25
1.5	1.5	1.75	5	3	3.5	0.75	2.25	2.75	12.25	0.25	4.25	2	1.25	0.25	2.5
2.5	1.5	0.5	9.5	2	1.5	0.25	6.75	3.75	7.25	1	7	3.25	2.75	2.25	1.25
2.5	0.25	0.5	8.25	3	2	0.75	8.75	5.25	16	1.75	9.25	3	2	0.75	4
3.25	1.5	2	8.5	2	3	0.5	6.75	4.25	15	4.5	8.5	1.5	2.25	1.25	3.25
9.75	2.75	4.75	7.5	3.75	3.25	1.5	4.25	6.75	18.5	3.25	9.25	1.75	2	2	7
3.25	1	1.5	12.25	4.5	3.25	0.5	4	4.75	15.75	4.5	8.75	2.25	0.75	2.5	4.25
3.5	1.75	0.75	10.5	3.75	3.5	1	5	3.75	5.5	2.25	6	2.25	2.25	1.25	1.5
1.25	1.75	1	7.75	2	3	0.25	5.75	1.25	15.25	1.5	4	2.5	1	1.5	0.5
2.75	2.25	2.75	6.5	2.5	4	1.75	8.25	3	19.75	1	11.25	2.75	3.75	0.75	8
10.25	1.75	5.25	11.25	2.25	3	0	6.25	4	23	2.75	12.25	3.75	3.75	2.5	6
4.25	3.75	2	7.25	7	7.75	2	9.25	5	15	1.25	14.25	2	1.25	2.25	1.75
2	2.75	1.5	5.75	4.5	5.25	1.75	8	3	14.75	1	8	3.5	2	1.75	3.5
1.75	1.25	1.5	4	2	3	0.75	3.75	3.75	18.75	0.75	8.25	2.75	0.75	0.75	5
5.5	4	3.25	9.25	5	5.75	1.75	9.5	5.75	18	2	5.5	4.25	4	2.75	7
9.75	4	3.75	9.75	9.75	11	2.25	4.25	8.5	25.5	1.75	17.75	5.25	7	5.25	11
5.75	4	2.25	7.75	5	6.75	1.25	11.75	3	11	0.75	9	2.75	1	1.5	2.5
6	4.75	4.25	7.75	4.25	6	1.5	7.75	2.75	17.25	1	8	2.5	3	2.25	5.75
3.5	2.75	4.5	6.75	1.75	3.25	1.75	2.5	6.75	24.25	1.5	14.25	2.5	2	2.75	8.5
4	5	4.5	12.25	6.75	4.75	2.5	11	3.5	15.25	0.5	9.75	3.5	1.75	2.5	3.75
2.25	3.25	0.75	6	1.75	5.75	1.5	5.75	3.25	11.25	3	4.75	3.75	2.5	2.75	3
2.5	3	1.5	11.75	2.25	9.5	1.25	5.75	8.25	18.25	1.25	8.25	2.75	3	1.25	7.5
5.75	3.25	1.5	6.5	3	4.75	2	6	12	27.25	1.75	9.5	6	5.5	1.75	15
6.5	3.5	1.75	8.5	5.75	5.75	2	8	12.75	18	0.5	7.75	3	5.75	0.5	5
4.5	4.25	3	19.25	2	7.5	1.25	6.5	16.5	18.25	4	5.75	5.5	3	3	7.5
7	5	4	16	4.25	7	2.25	6	20	33	2.5	11.5	8	7.75	3.25	8
2	7.25	1.25	24.25	4.75	5.25	2.25	8.5	8.75	15.5	3.75	6.25	7.5	2	4.25	2.25
2.5	10.5	2.25	16.5	4.75	6.75	1.25	4.5	9.5	9.25	2.5	3.5	5.25	1.5	3.25	2
6.25	0.75	1.75	14.75	4	3	0.75	7.25	6.25	10.5	2.25	12.5	4	2.75	4	2.5
6	2	2.25	18.5	0.75	4.75	0	14.75	8.25	9.75	1.75	14.5	5	2.5	3.25	3.75
0.5	1	0.25	13.25	1.5	1.5	0.25	7.25	5.5	14.5	3.5	13.5	3	2.75	4.75	2.75
4.5	1.75	1.5	8.75	0.75	2.75	0.25	7.5	7	21.5	5.5	8.75	4	1.75	1.25	9.5
15.25	0.25	3.75	8.75	2	1.75	0.25	8.25	4.5	18	7	10.25	4.5	3	3.25	7.75
3.5	2.25	1	10.75	2.5	3.25	0.5	10.25	4	14.75	3	6	5.75	2	5.25	3
3.5	4.25	4.25	10	2	3.75	1	9	6.25	16.75	3.25	12.25	3.5	2.75	3.25	4.5
4.25	2.75	3.75	10.25	2.5	5.5	2	6.5	4.75	32	2.25	10.5	1.75	2.5	1.75	3.75
13.5	1.75	7.25	12.25	8.5	7.75	1	14	5.75	14	4	16.75	7.5	6.25	8.5	3.75
1.25	1.25	0.75	6.5	1.5	2.75	1	9.25	2.75	12	2	5.5	3	1.75	0.75	3.75
7	2	4.75	7.25	2.5	3.5	1.25	7.5	6.25	26.25	2.75	9.75	4.75	2	3.75	6.75
2.75	2	1.5	5.5	1.75	5.25	1	6.25	4.75	17.25	0.75	11.5	2.5	1.5	0.75	4.75
12.75	4	1.5	6.25	4	4.25	0.75	8	2.5	10	4	5.5	2.25	2.25	3.5	1
6.25	2.75	4.25	8.75	2.5	5.25	1.75	7.25	3.75	17	1.75	13.5	3	1	2	4
3	2	2.75	4	2	4.75	0.5	5	3.75	25.25	1.5	11.25	1.5	2.25	1.5	5.75
5.25	1.75	1.75	5	0.75	4.25	1	6.5	2.75	18.75	4.25	6.5	2.25	1	1	3.5
4	2.5	2.25	9	6.25	9.25	3.75	12.25	3.25	14.25	2.5	12.5	1.5	4.5	1	3
3	2.5	3	5	3.5	4.75	1.25	6.25	3	13.75	4.25	3	2.5	1.5	5	2.25
3	3.25	2.25	7.5	3.75	9.5	3.5	6.25	2.25	21	2	9	2.25	1.25	0.75	6.25
2	2.25	1	8	1.5	4.5	1.5	11.25	3.25	20.25	1.25	9	3.75	4.25	3	5.5
2.25	2.5	2.5	6	4	4.75	1.75	9.25	8.5	21.75	1.75	8.5	3	2.25	1	4.75
3	3	1.75	10.5	2.75	4	1	7.5	4	10.75	1.5	7.5	3.5	1.25	3.25	1
9.25	3.5	4.75	3.5	3.25	9.75	2.75	4.75	5.5	25.75	1	15.25	4.25	5	3.25	8
10.5	6.5	5.5	12.75	5.25	9	3	8.75	11.5	15.25	3	7.5	5.25	1.75	4.75	4
12.25	8.5	2.75	17.5	10.5	22	4.25	6.25	18.75	23.75	2.5	20.75	9.5	4.75	1.75	6
7	5.75	3	16.75	9.5	8	2.25	10.75	16.25	18.25	2.25	11.75	7.5	6.5	3.5	8.25
5	4.75	1.75	17.25	4	9.5	2	9.25	11	9.75	3.75	5.75	4.25	5.75	1.5	5
3.75	5.25	1.75	19.5	2.75	9.5	2.5	10	19	14.5	3.75	9	7.5	8.5	3	8
4.25	5.25	2.5	18.5	0.5	10.75	2	7.75	17	11	5.25	11	7.75	7.25	4	8.5
10.75	9	4.25	19.25	3	9.75	2.5	6.75	17.25	14	5	12	10	5.5	5.25	9.25
10.5	8	3.5	22.25	2.5	7	2.75	10.75	15.25	3.5	2.75	6.75	9.75	1.75	4.5	1.75
4.5	8.75	4.75	18.75	4.75	6.75	2.25	5.5	12.5	7.75	4.25	7.25	7.25	1	5.75	4
2.75	2.75	1.5	12.5	1.5	3.75	0.25	6	6	4.75	2.75	2.25	3.75	1	3	3.25
9.75	0.75	4.5	20	2.25	4	0.25	13.25	7.5	13.75	5	11.25	7.25	2	5.5	6.75
5.25	0.75	0.25	17	0.75	4	0.25	8	7.25	7.5	2.75	10.75	3.5	1.5	2.75	2.25
2.5	1	0.25	10.5	0	0.75	0	7	2	14.5	5.5	3.75	5.75	1.25	4.25	1.75
12.5	0.75	3	8.75	0.5	2	0.5	5	9.5	20.5	7.25	11.75	4.75	2.25	2	8
2.75	2.25	1	7.75	1.25	5.75	0	5.5	8.5	19	1.75	10.75	4.5	3.5	1.5	8.25
6.5	3.75	5.5	9.5	1.5	3.5	0	6	8	25.75	5.25	18	2.25	4.5	1.5	6.25
1.75	2	1	7.5	1.25	2.5	0.5	4.5	4.75	24.25	4	10.75	3.75	6	2.25	7.25
3	1.75	0.75	10.25	2.5	2.75	1	12	3	9.75	3.5	2.25	5	0.5	5	0.75
3.5	1.75	1.5	8.5	2.5	5	0.5	7.25	5.75	12.5	3.5	7	4.5	1.5	2	7.25
9.25	3.25	3.75	13.25	5	7.5	1.75	11.5	5	15	5.25	17.5	3	0.5	2.75	5.25
5.75	4	5	8	14.75	13.25	1	3.25	4.5	13	1.5	11.25	5	2.5	3	2
3.75	5.5	2	5.25	3	3.75	1.25	8.5	5.25	27.5	2.25	7.25	2	2.25	1.75	7
2.25	2.5	1.5	5.75	2	3	0.75	5	3	11.25	3.75	7.75	3.5	1	3	2.25
5.25	1.25	1	8.75	1.75	5.25	1.25	5	4.5	9.25	2.5	10	3.5	1.25	4.5	1.75
1.5	0.5	2	8.75	1.75	4.25	1.25	8.5	3.25	11	1.5	7	4.75	0.75	2.75	0.75
7	2.75	2	6	2	1	0.75	4	6.25	20.5	6	8.75	1.5	3.75	1.75	4
3.5	2.25	2.75	9	1	2.25	0.75	7.25	4.5	20.5	2.5	11.25	3.75	1.75	2.25	2.75
7.75	2	3.25	6	3.25	3.75	2	4	6.25	20.5	3	11.25	3.25	1.5	2	8.5
11.75	3.5	4.25	7	4.25	4.25	1	6.25	6	14	3.75	7.5	2.5	2.75	1.5	5
1.5	4.5	4.25	7	3	5.5	2	6.25	4.5	15.75	2	4.5	3.75	0.25	2.75	0.5
6.25	2.25	2.25	8	6.25	5	1.75	7.75	4.75	23.5	4.25	20	2.75	2	2.5	6.25
3.75	3.5	3	10	4.25	5	1	6.75	4.5	18.5	0.5	7.5	2	3.75	3.5	5.25
2	2.5	3.75	5.25	3	3.75	0.75	8.5	3.75	17	0.5	6.5	6.75	1.5	1.75	3.25
2.25	3.25	2.5	10.5	4.25	3	2.5	9.75	3.25	10	2	6.25	3.75	0.25	3.75	3
2.5	2.75	0.75	5.5	3.25	6.75	0.25	3.5	3	21.75	4.75	8.5	3	4.5	1	7
3	1.75	0.75	7	4.5	3.75	1.25	7.25	3.75	14.75	1.5	16	1.75	1	2	2.75
4	0.25	1.75	6.5	1.25	3.75	0.5	6	4.5	12.5	2.5	10.25	2.75	3	2.25	4
13.5	1.5	2.5	5.75	0	1.5	0.5	1.5	6.25	20.5	3.5	7	2	2	0.75	4.5
6.25	2.25	2	13	1.5	3.25	1.5	11	6.75	17.5	1.75	13.75	3.75	3	5.5	2
2.5	2.75	1.5	10.25	1.25	4.5	0.75	7.5	3.75	20	4	10	2	0.75	3	2
5	2.5	0.75	9.5	2.25	3.5	0.5	8.25	3	11.25	4	7.25	2.25	2.75	4	2.25
2.5	3	1.5	6.75	0.75	3.5	1.5	5.25	4.75	28.25	3	10.75	3.75	4.75	0.25	5.75
2.5	2.25	1.75	4.25	0.75	0.75	0	5.25	4.5	23.5	3.25	5.75	3.5	1	1	5.5
3.75	0	0.75	9.5	3.75	2.5	0.25	2.75	2.75	10.25	1.5	8.75	3.5	0.75	1.5	3.75
4	3	1.75	7.25	4.75	6.25	0.75	5	4	16.25	1.5	11.75	2.25	1.75	1	3
3	2.25	2.25	9.75	3.75	5.75	0.5	4.75	2	18.5	1.75	8.75	1.5	0.5	1	1.5
4.25	2.25	2.5	5	2.75	5.25	2	5.5	2.75	20.5	3.25	19	3.75	2.5	2.5	5
1.5	4.25	2.25	8.75	3.75	4.75	1.75	8.25	8	20.75	1.75	8	2.5	3.75	1.25	5.75
2.75	4	4	6.75	3.5	3	1.5	8	2.5	10	1.5	4.75	2.75	1	1	0.75
9.25	2.25	5.5	3.75	1.75	3.75	0.5	3.25	6.75	31	2	14	3.25	2.25	0.5	8.75
7.5	2.25	3	4.5	2.25	4.75	1.25	2.75	4.75	15.25	3	5.25	1.75	2.5	0.5	3
4	3.25	1.75	4.75	4.25	6.75	2	5.5	2.75	8	1.75	9	2.75	0.75	2.5	0.5
6.5	3.25	2.25	8.75	3.75	5	4	7.5	5.5	21.75	2.5	7.75	2	9.25	3.25	3.25
6.75	1.25	2.5	6.5	4.25	5	2	6	5	17.5	0.75	10.75	0.5	1.5	0.25	1.75
1.25	3	1.5	3.25	3.5	4.75	1.75	6.75	1.75	22.5	1.5	11	1.25	2.5	1.25	7.75
3	2.25	2.5	6.25	1.75	3	1	7.75	4.75	25.75	0.75	5.75	2.5	4	2.5	8
5.5	2.5	3.25	8	3	5	1.75	8.25	2.75	19.5	3	13	4.5	4	1.75	2.25
7.5	4.25	5.5	7.5	4.5	5.75	2.5	7.25	3.5	12.5	3	14.75	3.5	3.5	4.75	4.75
2.5	1.75	1.75	7.5	2.75	5.75	1.5	7.25	3.5	20.25	1.25	12.5	2.5	1.25	2.5	7.25
3.75	3	2.75	5.5	2.75	3.75	1.25	7	3.5	13.5	1.25	11.25	4.25	1.25	4.25	4
24	4.75	1.25	15	2.25	2.75	0.25	8.75	7.75	8	3.5	11.5	4	3	3.5	2
9	6.25	0.5	17.75	0.5	3.25	2.25	4.5	9.5	12.25	1	7	2.75	2	1.75	4
5	4.5	2	20	1.25	2.75	5	5.75	9	15.75	2	11	3.25	2.5	1.5	5.5
5.75	5.75	2.75	27.75	2	2.75	3	8	7.75	14.5	3.75	15.5	4.25	0.5	2.5	6.5
6.5	6.5	2.75	22.75	4.5	8	3	12	10.25	10.75	5.5	15	6.25	1	4	4.5
17.5	7	3.75	33.25	5	9.5	4.5	17.5	12.25	14.25	9.25	27.25	8.25	2.5	7.75	4.5
24.5	8	7.75	42.25	10	15	5.5	43.75	20	25.75	6.75	35.5	14.25	6.5	21.25	6
20.5	6.75	6.5	31.5	5.5	12	2	31	15.25	21	7.75	34.5	16.25	4	13.25	3.5
19.25	8.75	13	37.5	5.25	8.75	2.75	29	13.25	22.25	7	19.25	17.5	3	13.25	2.75
23	10	22.5	34.25	8	17.5	3	53.5	13.5	26	11	18.5	20	8	25.75	3
33.25	9.25	20.25	30.75	6.5	15.5	1.25	47.25	14.5	22.25	9	28.5	26	4.25	22.75	5.25
56	7.5	31	23	11.75	16	1.5	63.25	13.75	3.25	6.5	27.5	18.75	3.75	33.75	4.75
55.75	8.5	32.25	25.25	8.5	19.25	0.75	64.5	13.75	10.5	10.5	23.75	21.5	4.5	35.25	4.5
32.25	3.75	26.25	21.75	6.25	10.5	0.75	47.75	13	2.5	6.25	17.5	17.5	3.5	33	4.5
44	8	34.75	25.25	10.5	15.75	1.5	64	10.25	6.25	5.25	23.25	18.75	4.25	36.75	4.75
41.25	7.75	36.5	26.5	12.25	15.25	1.5	62	16	35.75	9.5	20.75	27	5	42.75	8.25
18.25	10.75	9.5	28	9	10.75	3.5	23.75	18.25	44.5	8	23	17.75	3.5	18	4
28	9.25	8.25	31.75	8.25	11.75	1.75	22.5	18.5	31.75	7.5	27.75	12.75	5.25	10	4.25
22.25	6.25	7.5	23.75	6.75	8.25	1.75	13.75	18	17.5	8.25	20.25	15	2.75	9.75	5
19.25	7.25	6.75	25.5	6	9.75	4.25	13.75	21	17	7.5	24	17.25	1.5	9.5	4
23.25	10	10	20.75	6.75	14.25	3.5	22.25	15.5	22.25	10.5	22.25	17.25	1.5	8.75	7.75
29	7.75	13.25	26.75	10	12	3	26.25	21.75	23.25	9.25	26	12.25	5.25	10.5	6.25
35.25	6.25	7.5	22	7	8	3.75	26.25	14.75	10.5	8.5	19.25	10.5	4.25	10.25	5.25
29.25	8	1.5	34	6	7.5	3.25	22	19	10.25	6.25	18.75	12.75	2.5	9.25	5.5
23.5	9	3.75	24.25	7.25	5.25	2.25	18.25	15.75	9.5	7.75	18.5	12.25	1.75	5.25	5.75
21	6.25	5.5	25.75	8.25	8.25	5.25	18.75	20.25	11.75	6.75	32.5	14.25	3.5	11	3.75
11.25	6.25	5.5	23.25	5.5	11.5	3.25	15.5	22.25	30.5	6.75	30.25	13.5	4	7.5	6.75
12.25	7.75	6	25.75	4.75	9.5	2.75	8.75	19.5	19.5	6.5	31	15.75	5	3.5	11.25
23	7	10.75	29.25	7.75	9.25	2.25	6.25	28.5	28.25	7.5	28.75	26.75	9.75	12.5	21.5
10.25	6.25	7.25	17.25	5.5	5	3.5	8	34.25	26	3.5	16.5	24	6.75	3.75	27.25
13.25	7.5	10.25	21.75	6.25	7	2.25	11.25	35.75	20	6.75	26.5	22	11.5	7.75	29.25
35.5	9.75	21.75	23.5	10.25	15.75	2.75	27.25	40.25	41.25	14.25	34.5	18.5	17.25	15.75	24
34.25	8	24.25	20.25	13.75	16	3.25	33.75	27	23	12.75	35	23.5	15.75	15.25	17.25
41.75	7.75	32.75	26.75	13.25	21.75	2.75	42	27.25	18.25	8.25	29.75	20.75	13.5	21	15.25
28.5	5	16.75	24.75	8.75	13	2.5	32	16.75	7.25	10	20.25	17	10.5	10.5	7.25
32.5	6.5	20.75	25	12.25	14	2.75	31.5	36.25	32.25	9.5	37.25	21.5	16.25	15.25	24.25
32	9.75	22.75	24	11.5	17.25	2.25	32.5	30.25	28.25	13.25	32.25	20.75	8.25	14.5	20.25
48.75	8.5	27	34.75	16.25	23	2.75	44	17.5	14.5	10.75	34.25	22.25	12.25	21.75	9.25
34.75	6	22	19.5	12.5	12.25	2	29.75	32.5	28.5	12.5	34.5	17	13.5	16.25	21.25
52.75	10.75	17.5	28.75	10	16.5	2	41.75	22.25	11.75	11.25	18	18.5	7.5	11.75	10
51.75	12.75	30.5	28.75	14	21.75	3.75	38	32	32.25	7.5	34.25	25.25	15.25	18.75	23.5
39	9.5	23.75	25	12.75	15.25	3.5	31.75	33	33.75	8.75	28.25	21	12.5	14.75	16.75
47	9.25	29	27.25	15.75	16.25	3	37.75	27.5	30.5	10	22.5	22.75	17.5	20.5	20.5
26.5	7.75	17.5	21.75	10.75	13.25	3	29.75	34.25	38.5	5.5	32	22	11.75	13.25	24.25
21.25	7	18	24	9.75	11.5	2.25	27.25	40.75	29.5	6.75	25.5	29	14.75	12	22.5
33.5	7.25	25.75	27.75	15.75	16	4	38	40	28.5	9.75	30.25	28	17.25	24	23.75
22.25	6.5	20	23	8.75	13.5	2.75	23.5	29.25	26	6.75	29.5	19.75	17.25	13.25	28.25
35	9	23.25	28.75	13	18.75	2.75	32	43.25	31.75	8	34.25	36.25	15.75	21.5	23
30.5	5	23.75	23	11.75	17	4	35.75	28.5	25	9.75	28.5	22.5	11	16.75	16.5
37	6.25	16	21.75	6.5	9	3.25	18.75	27.5	24	10	31.5	21.75	5.5	10.5	19.5
27.5	5.75	13.5	30.5	9.75	12.75	1.5	26.25	46.75	29.25	7.5	34.75	42.5	10.5	19	33
46.75	9.75	30.25	30.75	16	24.5	3.25	47.75	40.25	26.75	11.75	34.5	30.25	18.25	32.75	17
53	8.75	26.25	29.75	13.5	16.5	3.25	33	30.75	25	9.25	32.5	28	15.25	22	23
53.5	8.5	34.25	29.75	16.5	22.75	3	38.5	34.25	33.25	13	34.25	32	19	25.25	20.75
54.5	7	21.25	25.5	11.25	14	1.75	38.5	20.5	10.25	10.75	25.25	22.75	7	16.5	7.75
64	11.75	21.5	27.75	13	15.75	2.75	29.25	17.75	10	11	24.75	20.5	9	11.25	11
33.25	4.5	23.5	19	14.5	14.5	2.25	31.25	40.75	25.75	13	32.75	28	17.75	14.5	24.5
45.25	8	28	22	15.5	21.75	3.25	40.75	22.25	21.5	10.75	24.25	27.5	9.5	19.5	11
44	13.5	27	30.5	19.75	21	5.25	40.75	16.5	29.25	12.25	51.75	29.75	8.5	21.75	14.75
36.75	9.75	20.25	33	15.5	20.75	3.75	44.5	17.25	33.5	13	47.25	21.75	7	20.75	9
35.25	12.25	16.5	30	14.25	13.25	6	42.5	16	34.5	14.5	39.25	18.25	7.25	14.25	6.75
32.5	6.75	7.5	28.75	8.75	9.75	3.75	25	18.5	23.75	11.75	33	16.75	5.25	11.75	5
17.75	10.25	8.25	24.5	9	9.25	3.75	19.25	19.75	29.25	11.75	35.5	14.75	3	9	7.5
21.5	8.25	9.5	29	9	10.25	4.75	20.5	17.25	26.25	10.5	32.25	14.25	5.25	9	5
37.75	7.5	8.75	25.25	9.25	7.75	3.75	13.75	17.25	30	10	22.5	15.75	4.5	12	11.75
33.5	9.75	14.5	29	12.25	8.5	3	22	17.25	38	6	40.25	17.75	3.5	12.5	7.75
28.75	9.25	9	28.25	8.25	9.5	3	24.25	18	25.5	10	27.75	18	2.75	10.5	9.25
27	8.75	8.75	27	8.5	9.5	6	23.25	14.75	30	9.25	25.75	16.75	2.75	10.75	8.5
36.25	8.75	8.75	28	7.5	11.5	4.75	25.75	19	28.5	11	36.5	15.75	4	12.5	5.25
31.75	13.5	11.25	27	9.75	12.5	5.75	21.5	17.25	27.75	10.25	31.5	16	4.25	9.75	7.25
32.25	10	8.5	23.5	11.75	13.5	4.25	22.75	19.25	18	11.5	33.75	17.25	6.25	9	11.25
27.5	7.75	5.25	28.75	9.25	13.75	4.5	19.25	17.25	23	12.25	35	16.5	3.25	8.5	9.75
22	7.75	6	20.5	6	11.5	2.5	17	18.25	18.5	9	27.75	17	5	6.5	7.25
31	10.75	6.25	27.5	9	12.75	2.75	20.75	16.5	14.75	8.75	25.5	14	6	7.25	6.75
20.75	10.5	6.5	32.75	11.5	12	2.75	25.5	15	19.25	10.25	29.5	17.25	2.25	10	9.75
19.25	8.5	6	28	9.5	11	4.25	15.75	20.5	34	8.75	34	17.75	4	10.5	8.25
21.25	10.75	5.5	26.75	8.5	8.5	3.25	16	17	19.5	9.5	28.25	15	4	13.5	5.5
16.75	13	10.25	29	7.5	8.25	3	15.75	18.75	29.5	12	32	18.25	3	14.5	9.75
27.25	6.25	6.25	25.75	7	9	3.5	26.75	19.5	28.25	9.5	33.25	15	2.75	9.75	6.25
18.25	12	10.5	26.5	12	11.5	5.5	16	22	31.5	13.25	25.75	17.25	3.75	8.25	10.5
16.5	14	6.5	23.75	5.25	12.5	3.75	21.75	19.5	23.25	8.75	26	15.75	3.25	13.25	13.25
11.75	13.25	5	30	8	15.25	2.5	12.5	22	25	9.75	27	20	5	15.5	12.25
11.75	12	5.25	30.75	6	19.75	2.25	17.75	21	21.75	7.75	26.25	18	5.75	10.5	9.75
22.25	13	8.25	39.25	9.75	15.75	5.25	25.75	15.25	32.5	6.25	28.5	17	5.25	9.75	7.25
33.5	9	11.5	37	5.75	16.25	3.5	36.75	21.5	20.75	8.75	33.75	15.5	4.5	13.25	6.75
37.25	10.75	25.5	34.5	13.75	13.25	4.25	40	20.25	19	14.5	29.75	24.75	11.75	29.25	7.25
24.25	14.25	4.75	26.75	7.25	11	3.5	15.5	16.25	23.75	9	27.5	16.25	3.75	6.75	7.75
22.5	10.75	6.75	31	7	10.75	3	14.25	17.75	30.25	8.25	31.25	17.25	5.25	7.25	11.5
22	15.75	8.25	26	9	17.25	5.25	12	19	30.5	5.75	33.5	14.75	4.5	10	11.5
15	12.25	6.75	24.75	7.5	22.5	5.75	14.25	32.25	23.25	8.5	36	20.5	6.5	10	17
20.25	12	5.25	20.5	9.5	11	5.25	20.75	13.25	14.75	9	24.25	17	3	8.5	6.5
17.25	8	6	38	8.25	9.25	3.5	17.5	18.25	15.75	9.5	26.75	16.25	4	8.5	7.5
35.25	11.25	5.5	33.75	8	12.25	3.25	15.5	18.25	19.25	8.25	28	17.25	6.75	6.25	6.5
16.25	9	8.75	33	10.25	9.5	4.5	14.5	29.75	20.25	5.5	23.25	18	5.5	4.25	21.25
31	11.5	5.25	45.75	11.75	12.5	3.5	19	19	20.5	8	27.25	16	2.5	8	8
31	9.5	4.75	43.75	9	7.25	5.75	19	16.5	15.25	11	21.75	16	5.5	14.5	8.75
20.75	9.5	7.5	37.25	11.25	12.75	4.5	21.75	18.25	15.75	10.5	27.75	20.5	4.75	11	10
17.75	8	4.5	37	9.25	14	6	29.75	21.25	9.25	7.75	36.25	17.75	4.25	10.25	12.25
18.25	15	9.25	21.75	7	10.25	2.75	25.25	17.75	25	8.75	25.25	15.75	2.75	11.25	8.75
17	10.75	6.75	24.25	10.25	16.25	3.5	17	21.5	23.75	8.5	35	18.5	3.25	10.5	9.25
18.25	14.25	8.25	29.25	11.5	17.25	5.75	17.5	18.75	27	9.25	32	20.5	4.25	7.75	13.5
15.5	12.25	5.75	29.75	8.75	12.75	4	17.5	22.5	18.75	8	28.75	19	4.25	10.75	12.25
19	9.5	6.25	18	12.25	10.25	3.75	18.25	19.25	14.75	8.75	35.25	15	5.25	8.75	13.5
9	14	6.25	29	6.25	10	4.25	12.25	21.75	13.5	6.5	29	18.25	5.75	12.5	14.5
15.5	6	6.25	31.75	4.75	8.5	4.75	23.25	23.5	22.75	7	29.25	21.5	5.25	12	11.25
13.75	10.25	7.25	28.25	8.25	11.75	5.75	15.75	25.5	14.5	11.75	20.5	21.5	4	12.5	16.25
13.25	15	7.75	30.5	12.25	10	4.25	16.5	18.75	18.25	10.75	23.25	13	3	9.25	9.5
21.5	15	8.75	37.75	7.75	12.75	5.25	23.5	17.25	20	9.25	30.75	15.5	3.5	14.5	6.5
12.5	11	7.25	29.5	5.75	6.75	6.5	13.5	20.25	33	8.75	27.25	23	5.5	12.25	16
20	11.5	9.5	28	7.75	7.5	4.75	17.5	22.5	26.75	5.5	34.25	18.5	6	8.75	10.25
11.25	7.75	6.25	24.75	6.75	7.25	3.75	15.25	19.5	29.5	9	36.25	17.5	6.25	9.75	8.75
22.5	12.5	4.25	24.75	5	7.75	3.5	13.5	18.5	18.75	8.25	28	19.5	5.75	6.5	9.75
13	6.75	7.25	25.5	8	8.75	4.25	17.75	23	23.75	6.25	22.5	13.75	2	8	11
15.25	9.5	8.5	28	6.75	7.25	4.25	22.25	26.25	31.5	10	28.5	18.75	5.5	9.25	13
11.75	8	5.75	24.25	4.75	6.25	4	18.25	24.5	26	6.25	38.5	20.5	16.75	8	19
20.5	5.5	12.25	25	7.25	8	7.75	30.25	17.25	28	7.5	30.75	21	18.5	11.75	15.5
22	5.75	13.25	24.25	6.5	8	2.25	24.75	28.75	33.75	8	41.5	26.75	21.5	10.5	27.25
49.25	11.75	10.25	23.25	6.75	10.5	4.5	31.75	37.25	32.5	9.75	38.75	23.75	20.5	11	19
11	6.5	6.25	20	3.5	7.5	4	22.75	28	29.25	6.75	24.5	19.75	9.5	6.25	17.75
16	7.25	7.75	22.5	8.25	8	4.75	24	21	13	8	20.75	15.25	8.25	7.25	13.5
25.5	6	9.75	30	8	12.25	4.5	23.5	19.25	15.75	12.25	28.75	18.25	6.5	7.5	10
15.75	8.25	6.75	23.5	5	7.5	2.5	19	20	22.75	7	39.75	14.25	6	8.75	9.5
13.25	5.75	6.75	18.5	5.5	9.25	2.25	20.25	30.25	27	4.5	37.75	24	10.75	7.25	17.25
12.5	6.25	7.75	13.5	4.75	7.25	2.75	19	29.25	53	10.25	44.75	27.75	28.75	8.75	16.75
11	4.25	10	12.75	6	7	0.5	25.25	32.25	46.5	7.5	30	17.5	17.75	7	15.25
16	6	7.25	14.75	5.25	10.75	2.25	29	18.75	37.5	7.5	23.25	21	13.25	10.5	14.5
16.25	4.75	11	14.75	5.5	7.75	2.5	25	15.75	10.75	8	16.5	23.75	7	8.5	13.5
13	8.25	8.75	12	5.5	4.25	4.25	21	21.25	10.75	11	10.25	17.5	4.5	6.5	11.25
42.75	10.75	20.25	26.5	18.25	20.75	7.75	41	22.5	26.75	14.25	26.25	32.75	9.5	15.75	14
7.75	6.5	5.75	19	1.75	5.5	1	18.5	24.5	13.75	15	10	23	7.75	7	15
47.25	9.25	28.75	26.25	20.25	19	4	43.5	26.25	28	10.75	41.75	30.5	11.75	26.5	13.5
12.25	9	8.25	22.75	4.5	8.25	5	19.5	23.25	17.5	8.25	33.5	19.5	5.25	9	12.5
20.5	8	5.25	26.75	4	6.5	5.75	21	34.25	28.5	10.5	38.5	27.75	11	8	20
15.25	10.25	7.75	41.25	11.25	12.75	4.75	16.25	16.75	16.75	10.25	20.75	21	5.25	7.5	9.5
26	9	6.5	36	13.25	12	4	19.75	22.75	17	9	28.75	21.5	6.5	5.5	16.25
23.75	10.5	8.25	34.75	12.75	12	5	17	16	13.75	9.25	22.75	16.5	3.5	12.25	10.25
30.5	8	6.75	23.75	7.5	9.5	5.25	13.25	18.5	25	10.75	36.25	19	3.75	14	13.75
32.75	6.5	8	28.5	12	6.25	5.5	14.25	20	15.25	7.5	21.25	14.75	3	5.25	16
25.5	8	7.75	25.25	10.5	6.5	3	14.5	18	18.5	5.75	34.25	14.75	4.75	9.25	9.25
21.25	7.25	6.75	30.5	8.25	6.5	4.25	17	19.25	29.5	7.25	27	18.25	4	8	14.25
13.75	7.75	5.75	36.5	6.5	10	4	12	28.5	18.75	5.75	37.75	24.5	6.5	9.25	13
19.25	8.5	14	16.25	4.5	10.75	5.5	17	37.75	44.75	12.25	45	25.5	21.75	8.5	28.25
29.75	6.25	22.75	20.5	11.5	15.5	5	38.75	28.75	30.25	11	41.25	27	8.5	19.75	16.25
15.25	6.25	8.25	20.5	4.25	7.25	3.5	19.5	25	26	10.25	20	21	8.75	3.25	12.75
53	11.75	35.5	30.5	26.75	27	6.5	50.25	24	18.25	15.75	32	34.25	13.5	26.75	12.5
48	11.25	28.75	39	19.5	20.75	6.75	37.75	30.75	26.25	10.75	44.25	32.5	13	23	16.75
52.25	9.5	25	47.25	20	32	8.75	49.5	28.75	23.25	11	61.25	37.25	19	29.25	15.75
35.5	9.25	24	36.25	14	21.5	5.5	32	32.75	29	12.5	49	36	16.5	22.75	19.5
18	9	11.25	34	9	14.75	4.5	22	29.75	30.5	9.25	34.25	29	5.25	11.25	13.25
26.75	8.75	13.5	35.25	12.25	17	6.25	28	25.5	22.75	7.25	38.25	30	11	16.5	16.75
18.75	11.25	9.75	29.5	11.25	12.5	4.75	31.5	22.75	27	6.5	34.5	23.5	6.25	18.25	10
16.5	7.75	5.25	24.75	7.5	11.75	6.75	18	24.25	32.25	11	32.5	23.5	3.75	15.25	13.25
27.75	13.5	15.75	29.5	11.75	14.25	6.75	25.75	19	28.25	11.25	32.5	24	8.5	16.25	11.5
15	4.5	8.5	20	2	8.5	5.5	16.75	20.25	20.25	7.75	35.75	17.75	4.5	10.75	10.25
17	5.75	7.5	28.5	10.5	9.5	6.5	20.75	18.25	24	10.5	30.25	24.5	2	11.75	8.5
22.25	8.25	12.25	21.25	7	8.75	8.75	18.75	27.5	19	7.25	36.25	21.75	4.75	11.75	10.75
21	8	10.5	23	8	12.5	3.5	26.25	20.5	20.5	7.5	37.5	20.75	5.5	16	11.25
17.5	9	6	21.75	9	10.25	2.75	17.25	20.5	29.75	9	27.5	23.75	4.75	6.25	11.25
19	8.25	7.25	24.25	6.75	9.25	3.25	17.5	23	17.5	5	28	14.25	3.5	10.5	7.25
14.5	9.25	7	18.25	8	7.5	3.75	15.5	29	40	7	37.75	19	4	10.5	9.25
33	8.25	21.25	27.5	14.75	17.5	3.5	39.25	20	29.25	6	31.5	24.5	3.75	25.25	10
13	6	7.25	30	6	10.5	2	19	25.75	32.5	9	31.75	23.25	6.25	10.25	11
12	10	10.25	23.5	8.25	9	3.25	16	27.75	32.5	8	35.25	21.25	7	8.5	22
15	9	6.25	31	7.75	8.75	2.75	19.75	30.25	32.5	5	33.5	21.25	4	10.25	9.25
16.5	6	7.75	26.25	6.5	8.25	3.5	14	13.75	14.25	6.5	27.5	16.5	6.25	10.5	9.5
14.25	8	4.75	29.75	8.25	9	4.75	17.75	23.25	33.75	9	27.75	16.25	4.25	12.75	12
16.25	8.5	5	36.5	8.75	5.75	4	12	23.25	26.75	6	31	16	3.5	9	8.75
24.75	4.75	12.75	27.5	12.25	16	4	29.5	34	48.25	10	27.25	36	13.5	15.5	24.75
18.75	10.25	13.25	21.5	9.5	14	6	33	27.5	42	11.75	26	22	10	10.25	15.5
33.75	8.25	6.5	41.25	14.75	13.25	3.25	22.5	18.25	23.25	11.25	26.75	14.5	4.5	8.5	7.25
25.75	9	9.75	34	8.75	11	7	21.5	29	30.25	9.5	36	23	5.75	10.25	13.5
28.5	11	4	30.25	9.25	10.5	2.75	19.25	20.5	24.75	9.5	26	17.75	4.75	11	10.25
17.75	5.75	7	31	4.75	7.25	5	10.5	21.25	29.5	5.5	32.75	23	4.75	8.75	9.75
13.25	8	8.5	33.5	7.75	9	6.25	11.25	22.25	22.25	9.25	35	23	6.5	11.5	18.25
15	7.25	6.5	26	11.5	7	6.25	11.5	22	23	8.5	33.5	26.25	5.5	6.75	15
22.75	5.75	13.25	24.5	7.75	9	4	27.5	33.5	43.25	11.5	26.5	27.5	13.75	11.25	22.25
16.5	12	7.25	29.75	6.5	8.25	3	20	35	37.5	11	33	29.25	11	9.25	19.75
17.25	12.5	7	35.25	10.25	12.75	6.25	19.25	22.5	29	11	41.5	20.5	10	9	8.5
17.5	7.5	6.25	25.5	12	8.5	2.5	16.75	23.75	32.25	7.75	34	20	4	9.5	6.75
14.75	13.5	5.75	31.25	5.75	11.5	6.75	17.25	16	20.25	11.75	26.75	17.5	2.25	11.75	9.5
13.75	9.5	5.75	30	11.5	10.25	4.5	20.25	16.5	15.25	9.75	33.5	17	5.5	8.75	8.25
10.25	6.25	7.75	24.5	9.5	13.75	3.5	15.75	32	29.25	6.5	39	20.75	5.75	10.25	11.5
10.75	7.5	6.25	27	12.75	9.5	3.75	22.5	17	21	8	33.75	21.75	4.25	10.75	9.75
6.75	6	2.5	17.75	4.5	7.25	2.5	26.5	16	13.5	4.25	15.25	15.75	4.25	5	9
3.25	6.25	2.5	14.75	4.75	4.75	2.25	21.5	14.5	11.75	5.25	20.25	11.75	4	5.75	11.5
17	10	7.75	25.75	12.25	16.5	3	22.75	22.5	18.75	9	23.75	17.75	4.75	9.75	9.5
14.25	6	9	25.25	12	11.75	4	18.5	23.25	31.75	8.25	39.25	21	7.75	9.25	12.75
12.25	8.25	8.25	20.75	5	13.75	5.25	17.75	30.25	44.75	8.5	33.25	27.25	6.5	9.75	17.75
10.5	8.25	6.25	21.75	7.5	10.75	2.75	15.75	22.25	16.5	8.5	44.25	18.75	5	10	9.75
12.5	9.5	5.25	26.5	8	9	2.5	19.25	19.25	23	6.75	35.75	18	6.5	9.25	10.25
17.25	9.5	7	31.5	11.25	10.25	3	20.25	21.75	25	5.5	30.75	20	3.5	9.25	10.25
20.25	9.25	4.75	34.75	8.5	10.75	3.75	17.25	18.5	15	10.5	28.25	22.75	3	7.75	7.25
24	6.25	11.5	25.5	11.5	13	3.5	31	28.5	43	11.75	43.75	24.75	11	14.25	18.25
15.25	5.25	8.75	25.75	7.75	11	4	21.75	21.25	21.25	8.25	32.5	23.25	13.75	9.5	10.75
13.25	8.5	4.75	33.75	9	8.25	4.25	21.75	21.5	10.75	10.5	21.75	26	8.75	9.75	12.75
11	5.5	9.5	26	13.5	10.75	3.5	21.5	27	21.75	7.75	27.75	28.75	8.5	9.25	13.75
11.25	6.5	9	22.5	26	12.75	4	18.75	28.75	17.25	6.75	33.25	28.25	8.75	10.25	17.25
15	8	11	27.75	13.5	15	7.25	21.25	31	46	7	35.75	29.25	11.5	13	17.75
13	9.5	7	32.5	19	12.25	3.75	21.75	26.25	29	6.25	29.25	29.75	5.75	8.75	11
39	10.75	6	35	18	10.75	3.5	33.25	22.75	32.25	12.25	27	22.75	10.5	9.5	10.75
41	8.25	7.5	24.5	8.75	10.25	5.25	23	25.75	27	10.75	33.25	16.75	5	10.25	8.75
11.25	8.25	8.5	22.5	6.25	11.25	5.75	18.5	34.5	48.5	9.5	43.75	20.5	12.75	12.5	17.25
11.25	9.5	4	36.25	5.75	9.75	4.25	17.25	26.75	19.25	9.5	28	23.5	4.75	10.75	9.5
20.5	8.25	5.5	24.5	13.5	9.25	4.5	16	24.75	25.5	10.25	28.75	24.5	5.5	12.25	15.25
20	6.5	7.5	29.25	15	9.25	4.5	19.25	22	47	8.75	35.5	16.25	4	14	8
11.5	8.25	6.25	20.5	7.75	11.75	3.75	20.25	34.25	42.75	9.75	39	19.25	7.25	11.25	13.75
21	10.25	9.75	29	9.25	11.25	4.75	23	27.5	48.75	10.25	29.75	23.5	7.75	10.75	15.75
22.75	7.25	12.25	17.5	5.25	11.75	4.25	31	36.25	62.5	10	33.5	27.5	11	14	20.25
11.25	6	9.75	16.25	4.5	9.5	3.75	21	40	51	12.25	21	26.25	9.5	8.25	22
19.5	8.5	9.75	19.5	6	9.75	3	20.75	32	48.25	10	31.25	23	10.75	10	20.5
9.25	6.25	9.75	17	3.5	7	3.5	23.25	29.25	32.75	9.5	34	18.25	10.75	7.5	20
17.25	10	11.5	21	6.75	12.5	4.75	20.25	31	39	12.75	27.5	22.75	10.75	10.75	18.75
19	8.25	11.5	22.75	8	9.75	3.5	21	45.25	51.75	11.5	38.25	29	10.5	12.5	23.75
15	8.5	13.25	17.25	5.75	6.75	4.5	22.75	25.25	38	9.75	39.5	19.5	12.75	6.5	14.5
18.25	6.25	10.25	22	9.75	9.5	4	25.75	34.25	38.5	9.25	43.75	23	10.25	7.5	18.5
22.25	7.75	11.25	18.5	5.75	10.25	3.25	22.25	28.75	42	7.75	27	19	10.75	6.5	11.25
23.5	8.5	10	23.75	4.25	8.25	3	20.25	24.25	41	8.25	20.75	22	9.75	6.5	12.5
16.25	8.25	7.75	25	5	7	2.5	19.75	24.75	29	7.75	22.75	18.5	9.25	6.25	15.75
24.25	10.25	12.25	25.25	7.5	10	5	27.75	31.25	59.25	19.5	42.25	25.25	15.25	16.25	19.75
15.5	8	13.25	21.5	6.25	9.75	2	23.75	38	59.75	16	39	23.25	13.75	11.5	17.5
14	8.75	8.75	30.75	4.75	10.75	4.25	22.5	31	57	14	38.25	24	9	11	18
13.5	4	6.25	23.25	8.25	7.75	3.75	17.25	33.5	30.75	9.25	37.75	37	9.5	8.25	19.5
23.75	10.25	5.75	31.75	14.5	14.5	4.25	25.5	20.25	27.25	10.25	33.25	24.75	7.5	9.75	11.5
8.75	8.75	6	32.5	16	6.75	2.75	22	27	19	9	35.25	26.75	6.5	10.75	17.25
13	12.25	10.25	25	9	10.25	2	21.25	25.25	37	8.25	31.5	24.75	6.25	10	13
20.25	10	6.25	28.75	10.5	10	6	20.5	29.75	42.25	9	37.75	25.5	7.75	11.5	15.25
25.5	8.25	7.25	19.25	6.25	15.75	3.75	34.25	22.5	29	11	47.25	17	5.75	15.25	10.5
17.5	8	10	25.25	6.5	7	4.25	24.5	36.5	50	8.75	45	27	22.25	10.5	24.5
14.75	5.5	7	17	5	7	3	28.5	27.75	36.75	7.5	34	18.25	13.75	8.5	19.5
10	5.5	7.25	17.5	6.25	5.5	2.5	23.25	23.5	44	7.75	27	16.5	15.5	6.75	17.25
23.75	8	14	22.75	10.25	17.5	2.75	35.25	19.25	16.25	6.5	26.75	20.75	16.25	15.5	12.75
4	5	2.25	18	5.75	5.75	0.75	17.5	14.5	7.75	4.5	13	13	3.5	3.25	8.75
5.5	5.75	3	16.75	4.75	5	3.5	18	16.25	7.5	3.25	12.5	11.5	3.5	2.5	8.5
5	5.5	1.75	17.25	3.5	5.25	2	16.75	13.25	6.25	2.75	13.25	11.25	3.75	2	8.5
28.25	8.5	10	22.75	8.5	15.75	3.75	30.75	20.75	15.75	8.75	30.25	18	7.75	14	8.25
21	11.75	9.25	26	7.5	16.75	4	30	18.5	18.25	8.25	33.5	18.75	6.5	15.25	7.75
12.5	7	5.5	22.25	6.5	6	2.25	21.25	14	15	4.75	29.75	16	5.25	6.25	8.5
12.75	7.75	8.25	22.5	5	12	4.25	25.75	18.5	12	7.25	25.25	14	9	12.5	8
11.5	6.5	5.5	21	4.75	7	1.75	26.75	19.25	11.25	5.25	21.75	14.5	5	9.25	10
31.25	5	6.5	25	8.5	9.5	3.75	23.25	21.25	9.25	7.25	30.75	16.5	6.25	10.25	7.5
21.25	8.5	9.75	21	9	10.75	2.75	30	21.25	24	12	32.75	26	7.75	10.5	11.25
4.5	4.25	3	13.5	2.5	10.5	0.75	18.5	16	10.25	4.5	16.5	6.5	4.25	2.25	8
5.5	5.25	1	15	4.5	7	2.25	16.5	16.5	11.75	2.25	11.5	7.75	4	1.75	12.25
10.25	6.25	3	21.25	7	7.25	1.75	16.25	19.75	13.75	7.75	17	13.5	5	5.25	5.75
38.5	10.5	19.75	24	13.75	17.5	4.5	41.25	22.75	34	10.5	36	22	10.25	17.75	11.5
45.75	6.75	19.5	30.5	13.75	15.75	3.5	38.75	18.75	21.5	11.25	36.25	21	11	19.25	12.5
31.5	6	17.25	25.25	6.5	14.5	3.75	32	26.75	41.25	9.5	34.5	23	9	16.25	15.75
17.25	5.25	5.25	22.25	3.25	8.5	3	21.25	26	50.5	4.5	17.25	14.75	8	6.75	12.5
17.5	7.25	6.75	25.5	7.25	10.75	1.75	28	22.5	29.5	11.25	34	21.5	7.5	12	10
17.75	8.5	9	25.5	6.75	8.75	2.25	28.25	22	17.75	6.5	28.5	19.25	7.75	11.5	9.5
14.75	7.75	11	22.75	2.75	6.75	2	20	23	22	7.5	15.75	18.25	6	10.25	12.5
17.25	9	10.5	23.5	5.5	10.75	4	30.25	18.25	17.25	9.75	29.75	16.75	4.75	8.75	9.5
14	7	5.5	25.25	4.75	5	1.25	21.25	15.25	17.25	9.25	23.25	13.75	6	8.5	8.75
22	11.5	6.5	28	5.5	7	4	20.5	20.25	26.5	11.75	21.5	16	7	10	12.25
16	8.5	8	33.25	12.75	7	4.25	20.75	19.25	26.75	12	29.25	20.5	4.25	8.25	11.25
16.5	6.25	10.5	25.25	9	11	4.25	18.25	34.5	54.25	13	52	26.5	13.5	11.75	21.5
14	8.5	11	30.75	12	9	3.5	17.75	28.25	24	12	26	21.25	8	9.75	12.25
15.25	8.25	9.5	27.25	7.75	6.25	4.5	16.25	23.25	22.75	8.5	29.75	24.75	3.75	11.25	12.75
18.5	10	4.75	27.5	9	6.75	3	12	21.5	32.25	8	48.75	24	5.75	9.75	15.75
12.25	6.25	7.25	37.25	13.25	8.75	3.5	12.5	24.5	22.25	7.25	31.5	28.75	3	10.5	11.75
10.25	4.25	9.25	28.5	9.75	7.5	4.25	12	28	17.75	5.5	41.5	23	9.25	9.75	15.5
20.5	5.5	15	19.25	10.75	17.5	3.5	29	28	44.75	10.25	52	30.25	17.75	18.5	20
23.5	8	9.5	30.75	10.25	7.25	4.75	16.75	21.75	26.5	8.5	38.5	25	12	12.5	15
20.75	6.75	10.75	26.5	16.5	5.75	6.5	20.75	41.75	27	9.75	32.25	24.75	12	11.25	23
22	10.25	9.5	34	9.25	11.75	4.25	16.5	25	36.75	9.25	31.5	21.25	5.5	12.75	10.5
15.5	7	7	24.25	10	9.75	2	22.5	23.75	38.5	6.75	43	23.75	13.25	13.25	12.5
15.75	5.25	6.75	26.5	9.75	5.5	3	15.25	25.5	15.25	8	42	25.5	6.75	9.75	17
11.5	7.75	11.25	19	12.75	7.5	3.5	19.5	27.25	32	7	39.5	25.5	5	7.25	12.75
20	6.75	5.25	26.5	9.75	9.25	4.25	23	32.25	26.5	9.5	32.75	19.75	5.75	7.5	8.25
18	6	4	22.25	7.5	7.75	3.75	19.25	20.5	21.5	7.25	37.25	10.75	4.75	10.75	9.75
20.5	7.5	7	18.5	7.25	9.5	4	13.75	24.25	16.5	9	27.75	13.75	6.5	10.5	9.25
14.75	9.75	5	25.5	8.25	12.75	2.25	15.75	22.25	21.75	10.75	40.25	27.25	6.75	13.75	10.5
20.25	9.25	5.5	25.75	7.5	8	3.5	14.25	14.5	14.25	9.75	33	17.5	4.5	10.25	9.25
16	8	7.75	29.25	10	11.25	5.25	11.25	21.5	13.5	8	36.25	15.75	4.75	16	10.25
13	6.75	6.5	38	13.5	8.5	2.5	15.25	32	18	6	31	22.5	8	9.75	15.25
14	10	8	26.25	10.75	10.75	5.5	15.5	25.5	19.75	6.75	34.5	22	4.5	11	9.75
13.5	10	5.75	35.5	12.75	8	5.5	14.5	34.25	24.5	8.25	33	19.25	5	9.75	14.25
15.5	6.5	7.25	33.25	15.25	6.75	3.75	14.25	24	26.5	12	33.5	18.5	5	11	17
14.75	9.25	5.75	28.75	11.75	6	4	16.5	38	25.5	10.75	31.25	22	6.75	15.25	14
28.5	9.5	10	25.75	9.25	7.25	5	20.75	33.25	32	16.25	35	21.5	26	9	23.75
67.25	17.25	34.5	45.5	26.5	31.25	5.5	54.5	25.75	25.5	14	43	38.5	17.25	38	16.25
27.25	11.5	14.75	35.25	17	15.5	3.25	33.25	32	28.25	10.5	39.5	30.25	12.25	19.5	13.75
32.5	14	20.75	46.75	22.5	17.25	4.5	36.5	33.5	21.75	8	46.25	27.25	16.25	20.25	21.5
33.5	10.75	17.5	39.5	17.5	16.5	7	38	27.5	30.5	11.25	41.75	31.25	12.5	24.75	17
54	10.5	25.25	32	20.25	24.25	4	45.5	25.25	25.25	12.75	49	36.75	12.75	22	14.5
18	6.25	7.5	36	14.5	14.25	2.75	20.75	25.25	14.75	6.75	41.25	27.75	8	13.25	11
16.5	7	11.25	38.25	16	14.75	2	24	29	17	10.25	40.25	32.25	7.25	14.25	17.25
29.25	8.75	11.5	34.25	15.5	17.25	4.5	24	21.25	19	7	38.5	29.75	10.25	16	15.25
22.25	8	13.5	33	17.5	14.75	5	23.5	27	21.25	9	38	33.5	9	18.75	16.25
24.25	10.25	13.5	24	18.5	14.25	3.5	26.75	27.5	22.75	9.5	41.5	26.75	8.5	16.5	16
15.75	6.75	8.75	26	10.5	11	4.75	15.5	27.25	23	7	35	26.5	8.75	12	19.5
12	11.25	9.25	22	12.5	9	3	14.5	29.75	27	6	36.5	22	6.25	15.5	15.25
16.75	7.75	13.25	28.75	19	8.5	4.5	18.75	27.25	21.75	6.25	39.25	26.5	9.5	13.25	15.25
8.25	10	7.25	20.25	6.75	14.75	2.75	8.75	22.75	32.5	8	43.75	22.5	3.25	10.75	10
25.5	9.25	7	29	9.5	11.75	3	20.5	21.5	24	6	30.25	23.25	6.25	14.25	12.5
17.25	8.75	7.25	18.75	9	12.75	3.75	14.5	24.5	31.5	7.5	38	25.75	10	12.25	16.75
37.5	11.75	11	21	6.25	18.5	4.25	21.75	24.5	32.5	13.5	32.25	30	8.25	11	10.25
26.5	7.75	7.25	28.5	10	8.75	3	25.25	17	20.75	7.5	19.25	20.75	3.75	15.25	8.5
18.5	11.25	6.5	31.75	8.25	9.5	3.75	23.25	25.25	15.5	6.25	30.75	20	3	17.5	9.5
17	8	10.25	29	15.75	11.25	2.75	28.25	20.75	23	8.75	36.75	20.75	8	12.75	10.75
15	8.75	4.5	25	15.25	10	3	20	23.75	25.25	8.75	33.5	21.25	4.75	10.25	9.25
15.25	10.75	3.75	34.75	15	4.75	4.75	19.75	19	20	6	28	19.25	3.75	7.5	12
14	5.75	7	35.75	15.5	5.5	4.25	24	30.25	33	8	36.5	27.75	4.25	9.5	17.75
16	9.75	9	29.25	15	7.5	2.25	19	22.25	18.75	7.75	29.75	23.25	6.75	8	13
16.25	10.25	6.25	25.25	15	8.5	3.75	22	23	23	5.25	31.75	21	7	12.75	12.5
28.5	9.5	6.75	24.25	7.5	8.75	3.5	29.25	28.75	32.25	10	40	24	5.75	12.75	17
23.75	6	12	21	5.5	8.5	4.5	21.75	29.25	47.25	14	45.75	25.75	11	13	15
21.75	9.25	17.75	21	10.5	12	3.75	32.75	37.75	37.5	14	34.25	27	13	15	24.25
15.75	7.5	8.25	16	5.25	7.5	3.5	26.75	43.25	28.5	11.5	45	39.5	20	10.75	27.75
14	4.75	5.5	16	5.5	9	6.25	30	44	35.25	7.75	49.75	24.25	21	10	24.25
38.75	10.25	5	28.5	9.25	9.25	4.75	18.75	25	23	10.75	33.75	19.25	4.5	15.75	11.25
23.5	11.5	5.75	25.25	6	5.5	3.25	18	23.25	21	9.75	38.75	23.75	7.25	9.75	9.25
14.5	10.25	6.5	25	11.5	8.25	4	14.25	21.25	27.75	11.25	31.75	28.5	5	8.25	11.25
11.75	7	7.5	30.5	9.5	7.5	4.5	12	32.25	23.5	8.25	32.75	21.75	6.75	11	17.75
22.5	7.5	10.25	30.5	7	10.25	4.5	18	26.5	33.75	8.5	37.25	21.25	8.75	11.5	10.75
14	9	7.25	18.5	6.5	10	4.75	20.5	16.25	12	14.25	30.75	22.5	3.5	5.75	5.25
13.75	6.25	7.5	23	10.75	7.75	4	12.5	26	23.5	8.5	40.75	24.5	4.75	12.25	14.75
12.5	4.5	5.75	16	6.75	8.5	1.75	19.25	29.75	27.25	12	30.5	23.25	7.5	11.75	15.5
17	8.5	7.5	18.75	8.75	9.5	3.75	23	36	52	8	42.5	26	26.25	13	19.25
14.5	8.25	6	21.75	8.25	10.5	5.75	15.75	26.5	43.75	11.5	33	26	9	8.75	18.25
18.25	8.75	12.25	18.25	7.25	11.75	4.75	26.75	35	61	13.75	35.25	33	13.25	10	20.75
10	8.25	6.75	15.75	6	8.25	2.75	15	27.25	27.75	10.25	34.75	25.25	6.75	10.5	11
14.75	7.5	6.25	22.75	7.75	12.25	4.5	21.25	31.5	41.5	11.5	35.75	29.25	11.5	10.75	15.25
16	14.25	6.5	22.75	6.5	7.25	3.25	18.25	19.75	18.75	7.5	31	20.75	5.75	8.5	9
16	7	7.5	21.5	7.25	8.25	2.75	18	24.25	32	8	37.25	21.75	7.75	10.25	12.5
18.75	13.25	6	20	7	10.75	3.25	17.75	26	32	7.75	30.25	17	7.5	17.75	9.75
19.25	6	4.5	28	7.5	10.25	3	15.5	21	17.25	11.75	31.75	19.25	4.75	12.75	12.5
26	7.5	8.75	22.75	11	9.25	2.5	10.75	22	14.25	7.75	33.5	20	4.5	11.5	11.5
25.25	7	8	27.5	9.25	6.5	4.5	12.25	24	17.25	9.75	33.5	22.25	5.25	13	10.5
20	9	5.5	24	6.75	8.5	2.75	17	26	23.75	7.25	35	25.25	4.75	9.25	9.25
45	7.5	11.25	30.75	10.5	10.5	3	20.5	19.25	22.5	8.75	37	17.25	6	11.75	7.25
19	4.75	7.5	22.25	4.25	8.75	2.25	21	38.5	37	10.75	37.25	20.25	11.25	13.25	22.75
11	6.25	9.5	24.75	5	10.25	1.5	23.25	29.25	46.75	10.25	23.25	18.25	11	9	16
19.25	5.25	6.5	18.75	4	9	2.5	28	27.25	67.75	8.75	29	18.75	10	10	17
12.5	8	6	15.5	3.5	8	4.25	23	31.75	48.75	8.75	27	17.25	11.75	5.25	18.75
12.75	5.75	5.75	18.25	2.25	7	1.75	23	25.25	54.75	9.5	28.75	15.75	16.75	8	16
10.75	6	5.5	20.25	3	6.75	3.5	21	28.5	53.5	7.5	35.75	20	16.25	10.25	25
10	5	4	18.75	3	8.5	1.75	18.25	28.25	55.5	9	26.5	16.25	19.75	9.75	22.5
11.25	7.75	5.5	17	3.5	6.5	2.25	13.5	26	51	8.25	30.5	14.25	8.75	5.75	14.25
14	5	8.5	16.5	6.75	8.75	1.75	18.75	22.25	31	7	24.75	17	11	10.5	11.25
7.25	6	5.75	20	1.5	5.75	1	16.5	24	28.25	8	26	16.5	7	7.5	16.25
13	5	7.5	21.75	4	8.5	2.75	19	27	49	9.5	18	19.25	5.5	9.75	13
15	8	9	21.75	5.25	12.25	3.5	19.75	27.5	44.75	7.5	35.25	23.5	15	14.75	14
23.25	5.5	7	21	6	9.5	3.25	17.25	37.5	34.75	10.75	36	19.5	10.5	10.25	23.5
11.25	7.25	11	20.25	3.5	6.25	3.5	19.25	37.75	37.75	7.5	36	22.5	12	9.5	32.75
7	3.25	5	15.75	3	6	1.25	14.75	23.75	25.75	7	16	21	5.5	3.75	15.75
15.75	8.75	7	30.25	6.5	6.75	6.25	17.75	27.5	23.5	7	31.5	20.5	6.25	10.75	9.75
24.75	7.5	6.75	32.25	8	8.25	5	15	26.75	37.25	5	34.5	15.75	5.75	15.75	10.25
14.75	9	6.75	22.5	7.75	6.5	3.25	19	36	45.25	9.25	47.25	21.25	10.25	10.75	21
13.5	8.25	2	26	7	8	3.25	16	26.25	33.75	8.25	31.75	19.25	8.25	11	19.5
7	8.25	3	23.5	5.5	6.25	5.25	18	30.5	34.25	7.5	30.75	21	16.5	10.5	21.5
19.5	9.25	3.25	24.5	5.25	7.25	3.25	14	22	24.5	4	25.75	17	3.5	8.25	10
11.75	8.5	3.75	24.25	9.25	8.75	5	11.25	32.25	37.75	9	38.25	23.5	18.5	8.5	22.25
24	8.25	9.25	20.75	9.5	11	4	23	28.5	35.75	8.25	27.25	19.5	5.5	14.25	12.25
12.5	7.75	8	24.25	6.75	7.75	2.75	17.5	36.25	31.5	9.75	41.75	33	12	10.75	23.75
17.5	14.5	6.75	31.5	6.5	10.5	6.25	18.5	22.25	27.75	10	30	21.75	3.5	12.5	8.5
13.75	7.5	6.75	21.75	6.25	10.25	3	13.5	16	25	10.75	21.5	19	5.25	8.25	12
11.25	8	3.75	23.5	11	6.75	3.75	13.75	29	21.75	8.75	36	31.25	6.25	12	10.5
21.75	8.25	7	25.25	8	8.75	2.5	21.5	23	18.75	7.75	34.75	18.75	4.25	11.5	8.75
19	8.25	9	28	7	10.5	2.25	20.75	27.75	45	10	38.75	24.5	6.25	9.5	17.75
16.5	4.75	6.75	24.5	10	12.75	2.25	21	30.75	43.75	7.75	39.75	22.75	7.5	17	15.25
21.75	9	8	26.25	6.75	11	5.25	22	27	21.75	6.25	35	16	9	13.25	13.5
19	8.75	4.75	22	6	6.75	3.25	13.25	18.75	21.75	9.75	20.75	19.5	4	12	10.5
15.75	5	6.5	24.25	4	9	2.5	20.25	31.75	30	10.25	37.25	22.5	5.25	8.25	14
13.5	7.75	4.25	22.25	3.5	8.25	2.75	15.75	25	21.5	5.75	25.75	20.75	5.75	12.5	7.25
16	6.75	6.25	14	4.75	5	1.25	16.75	13.5	6	4.5	23	14	2.75	7.25	8.5
3.5	5.5	1	15	3	3.75	1.25	12.25	8.5	7.75	2.5	14.5	7.5	2.75	2	5.5
6.5	5	1	16	3.5	3.75	1.5	15.25	5.75	10.25	4	12	5.5	1.75	3	7.25
2	3	1.25	14.25	1.5	3.75	0.25	6.5	5.5	13.75	5.75	11	9	0.75	4.25	6.75
5.75	3.25	2.5	13	3.75	3.25	1.25	14.5	6.25	7.5	4.75	12	7.75	1.25	3.5	6.25
6.25	3.25	2	13.75	2.75	6	0.5	11.5	6	15.5	7	10	7	3.25	3.75	5.5
3	3.5	1.75	10.5	6	5	1.5	12.25	6	10.25	4.5	9.5	6	1.25	5	6.75
4.25	2.5	0.5	11.75	1.5	6	1.25	11.25	6.25	12	6.75	10	5.75	3.25	2	6.25
2.75	3.75	1.5	9.75	4	3	0.25	11.25	7	12.25	5.25	15	4.5	3.5	2.5	5.75
3	3	0.75	14	3	3.25	1.25	7.75	3.5	10	4.25	11.75	5.5	0.75	4.25	4.5
2.75	2.5	1.5	14	3.25	3.5	0.25	12.75	5.25	25.75	2.75	12.5	3.25	3.5	1.25	4.5
4.75	2.5	2.25	8.5	3	4.5	1.25	9.75	8.25	16.25	2.25	9.25	10.5	2.25	2.25	7
4.75	2.75	4.75	18.5	3.25	3.75	2	12.5	13	20.5	5.25	13.75	7.25	3	4.75	7
3.25	2.75	2	11.75	5.75	5	0.75	11	6.5	14.25	2.75	8.75	9.75	1.75	2.75	6.5
5	2.75	1.25	13.75	1.75	7.75	3.25	11.75	6.25	10.5	4	11.75	2.75	2	3	4
8.5	2	2	16.75	4.75	4.5	1.5	7	8.75	16.75	3.75	12	6	3	2.25	7.25
1.5	2.75	1.25	12.75	3.25	3	0.5	11.75	5.25	9	2.5	5.75	4.25	3	1.5	3
3	2.5	2.25	17.5	2.5	6	1.25	9.5	7.5	19.25	4	8.5	6.75	6.25	1.75	5.5
4.5	4.25	2	12.75	3.25	6.25	2.75	12.25	7	11.25	2.25	3.75	8	2	4.25	2.75
4.75	3.75	3.5	10	4	5.75	1.5	5.25	11	18	8.75	12	2.5	4.75	2	9.5
3	2.25	1.5	13	3.5	4.5	1	9.25	4.25	8.25	4	14.25	3.75	1.75	3.25	3.25
9.75	3.75	3	9	3.25	5.75	2.75	7.75	8.25	11.5	3.5	12.75	5.75	4.5	3	4.25
1.75	2.75	1.25	11.5	3.25	4.75	1.75	9	8.5	17.75	3	12.25	4.75	3.75	3.5	8.25
2.25	6.5	3.25	11	6.75	6.75	3.75	7.25	5.75	17	3	7.5	4	6	3.25	6
8.25	2.75	1.75	13.5	4.75	5.25	2	7.75	2.25	7.5	4.5	4	6.5	0.75	3.25	1.5
6	4.25	0.75	13.5	2.75	3.75	1	10.25	5.5	12.75	3.5	8	3.5	5.5	3.75	5.5
2.75	1.25	1.5	12	2.75	5.5	1	5.75	4	14.25	5	11.75	3.25	5.25	2.5	3
6.25	3	2	16.5	2.75	2.5	1.75	9.75	2	15.75	7	6	7	1.5	2.75	3.5
10.25	4	4	13	3.25	4.5	2.25	6.25	12.5	25.5	6	12.75	5.5	2.5	1.75	5.25
2	3.75	1.25	12.5	2.75	4.5	1	8	4.5	13.75	3.75	6.75	4.75	5.5	4.25	5.25
3	3.75	2.75	15.5	8	7	2	6.75	5	12.25	2	11.75	4.75	1.5	1.25	6
3.25	2	1.75	9.25	4.75	5	1	6.25	1.75	18.75	1	8	3.25	2.25	2.75	5
4.5	2.25	1.5	11.5	6.5	6.75	2.25	8	4.5	13.5	3.5	8	5	1.75	4	4.75
2.5	2.5	4.75	10.5	3.25	4.75	1.5	9.25	5.5	18.75	4.25	5.25	5.25	4.5	3.5	4
5	2	0.75	11.25	2.25	3.75	0.5	11.75	4	11.5	3.5	16.25	3.75	1	3.25	3.25
4	1.75	0.75	14.25	3.25	2.75	0	9.25	2.5	8.75	3.25	5	4.25	0.75	1.75	3.25
2	1.25	0.75	9.25	2.25	5.25	1.5	6.75	8	15	2	6.75	7.25	2.25	2.25	5
7.75	3.25	2.75	10.75	2	4	2.25	7.5	8	24.5	2.75	9.25	4.5	3.5	2	7
6.5	4	2.5	10.75	5.75	6.25	2.5	8	4.25	14.75	5	11.5	2.75	2.25	2.5	4.5
6	1.25	2.25	12.5	6	5.75	1.5	2.75	6.25	19	2	11.5	4.5	6.25	1	4.75
3.25	1	2.25	10.25	5	5.25	1.25	5.5	4.5	19.75	4.5	9.5	2.5	5	1.25	5
2.75	2.5	1.25	9.5	3.75	3.75	1.75	7.5	5.5	14	3	6.5	7	2.25	4.25	7.5
6.25	3	4.75	13.5	4.5	5.75	2.5	7.5	5.5	10.75	1.75	11.75	3.75	1.75	2	4.75
5.75	2.25	3.5	12	3.75	9	2	12	4.5	16.5	3.75	13.5	4.5	1.5	2.25	5.25
1.5	2.5	2	10.75	5.25	6.5	2.5	8	5.25	13.5	1.75	11.5	4.25	2.5	2.75	6.25
3.25	2.75	2.25	8.5	3	4.75	2	8	4.75	22.75	1.75	9.25	3.75	1	1.5	5
5	2.5	1.5	10	2	3.5	1.25	7.75	6.25	21.5	3.5	14.75	6.75	5.25	1	6
1	2	1.75	11.25	4.75	3.75	1	6.75	2.25	13.25	2.25	6.75	5.75	1.5	1.25	3.5
1.75	2.5	4	6.25	5.5	6.5	1.75	7	1.75	15.5	2	15.5	4.25	2	2.25	3.5
5.25	2.5	2.5	6.75	3.25	3.5	3.5	8	4.75	12.75	2.75	13.5	2.75	4.75	3.25	5
6	4.5	5.5	10.25	6.5	7.5	5	10.5	2.5	12.5	1.5	10.75	5	2	2	2.5
4.75	3.5	2.5	7.5	5.25	5.75	2.5	4.75	3.75	13.5	4	7	4	4.25	1.25	3.5
3.5	3.25	6.5	7.5	3.75	5.25	3.75	8.25	4.75	12.5	1.75	13.75	4.5	2.5	2.75	5
4.5	2.5	6.75	10.25	6.25	6.25	2	5.5	12	28.75	3	13.75	4.5	10.75	4.75	13
4	1.5	1.75	10.5	4.5	4.75	0.75	8.75	8.25	17.5	2.25	8.25	6	3.25	4	7.5
4.5	2.75	1	6	9.75	4.75	0.5	6.75	3.5	12	1	10.5	5	1.75	3.25	3
4.75	1.5	1.25	11.5	3.5	5.25	0.75	9.5	2.5	14.75	2	12	3.5	1	3.25	4.75
1.75	1	1	9.25	2	2.25	0.25	7.25	3.5	13	2.25	6.75	3.5	1.25	2.75	3.5
4.25	1	1.25	6.25	4.25	2.25	0.75	8.25	8.25	17	4	8.75	4.25	2.25	1.25	5
4.75	1.75	2	14	3	6.75	0.5	10.5	1.5	16.75	3.75	14.5	3.75	1.25	4	3
3.5	2.75	4.5	8.25	1.75	4.75	0.5	3.75	7	13.5	3	8.75	6	3.5	1.5	8.5
3.25	2	2.25	8.25	2.5	2.5	0.75	6.25	2.5	16	1.25	8.25	2.25	1.75	1.5	6.75
3.5	2.75	2.25	14.5	4.5	5.5	1.75	7.75	2	16.5	0.75	14	1	0.25	2.5	3
3	2.25	2	7.25	3.5	4	1.75	6.5	10	10.5	1.75	4.75	4.25	3.25	2.25	6.25
5.5	3.25	4	10.5	6	6.75	2.5	9	5.25	18.25	4.25	12	3.5	2	4	5
7	4	5.5	8.25	5.75	5.5	3.25	6.5	6.25	24	5	13.25	4	4.75	2.25	7.75
2	4.25	4.5	14.5	4	5.25	2.75	8.25	6.75	15.5	2.5	18.5	4.25	4.75	3.5	5.25
3.5	3	2.75	12.25	5	5.75	2.25	5.25	6	9.5	1.25	11	4.75	1.5	1.5	3.25
3.5	3.75	4.75	10.75	7.25	6.5	3.5	10.25	2.5	14.25	2.25	10	3	0.75	3.25	3.5
2	2.25	3.75	9.5	6	4.75	2.75	8.75	4	14.5	3	6.5	4.5	3	4.75	3.75
4.25	2.25	2.25	7.25	4	6	2.25	8	3.75	17.5	1	6.5	3	1.25	1.5	3.5
7.25	1	2.25	7.75	2.5	2.25	0.75	8.75	8	13.5	4.5	13.75	4	2.5	2.5	4.5
5.75	1.25	3	8.5	5.75	4.5	1	5.75	6.25	18.25	5	8.75	4	8	0.75	6
5.25	1.5	2.75	9.25	3.75	3.25	0.5	18.25	3.5	10.5	2.25	7.75	4	1	3.25	1.75
6.5	2.5	1.5	11	2.25	4.5	1.25	9.75	7.75	15.75	4	6.25	4.75	2.5	2.25	6.5
6.5	2.5	2.25	11	4.25	4.25	0.5	6.75	5	14.25	3	10.25	4.75	1.25	2.75	7.25
5.5	1	1.25	5.75	1.5	3	1	10	3.5	14.25	2.5	12.25	4.5	1	2.75	3.75
5.75	1.75	0.75	11.5	3.75	4.5	1.75	9.25	5.25	23.75	3.5	16.25	3	3.25	2.25	4
5	0.25	2	9.5	4	4.25	1.25	5.75	3	10.75	3	9.75	2.75	1.5	2.75	2.75
11.5	2.5	2.75	10	3.5	5.5	1.75	11.5	4.25	19	2.75	12.5	5.5	1.75	3.75	5.25
2	2.5	2.25	5	1.25	2.5	0.5	9	8.75	25.25	0.75	8.25	4.75	6.75	2	10
3	3.5	1.75	10	4.5	3.75	1	10.25	4.75	22.25	2.25	8.25	3.5	1.5	2.5	7.5
6.5	3.25	2	10.25	5.5	6.75	2	5.75	3.5	16.25	2.5	10.75	3.5	2.25	1.75	5.25
4.75	2.25	2.75	11.75	5	5.5	2.25	10.75	5	13	3.5	6.25	5	0.75	4.25	3.75
4.75	3.5	3.75	13.5	3.75	4.5	1.75	10.75	4.5	19.25	4	12.75	4.25	2.75	1.5	6.5
5	2.25	2	9	4.25	2.75	2.75	9.75	3.75	18.25	1	16.75	4.25	1.75	3	6.5
6	1.75	1.75	10	4.75	4	1.5	6.25	5	18.75	3.25	13.25	4	2.75	2	7
7.25	2.75	3	11.25	3	5	1.75	8.25	3.5	12.5	3	14.25	3.25	4	2.5	4.25
6.5	2.5	3.5	7.75	10.5	7.5	1.25	6	4.25	14.5	0.75	8.75	3	2	1.75	3.75
4.25	5.25	4	8	4.25	6	3.75	8.5	4	15.75	1.5	8.5	2	4.75	3	5.5
11.25	1.75	4.5	6.5	1.75	3.75	2	4	7.75	27.25	5.75	11	3.75	3.25	2.5	7.25
1.75	2	2.5	7	5	5	3.25	10	6.5	15.75	1.75	9.25	3.5	1.75	2.75	4.5
2.75	3.5	2	12.5	4	4	2	12.5	1.75	14.5	2.75	10.25	3.25	0.75	3.5	1.5
1.75	1.25	3	11.25	9	3.25	1.75	7.5	4	12	1.25	9.5	4.25	1.5	2	3.5
4	1	2	9.5	3.5	7	1.25	5	4.75	14.25	2	10.5	1.75	1.75	2.75	5.5
4.25	1.75	2.75	12	3.25	4.25	1	8.25	2.5	11	2.5	16.5	3.5	3.5	1	6.5
7.5	4	3.75	7.75	4.5	8.25	2.75	10.5	4.25	17.25	0.5	11.5	2.75	3	2.25	3.75
5	2.5	3.5	11	5	5.25	3.25	8	7.25	23.5	4	8.75	1.25	3.25	3.75	7.5
6.75	2.5	3.5	7	2.75	6	3.25	8.25	9.75	25.5	2.25	14.75	3.75	3.25	2.5	9.5
4	2.25	2.5	8.5	4.25	4.75	2.5	10.75	3.5	20	1.75	18.5	2.25	5	2.25	4.75
5.5	0.5	1.25	10	6.25	1.75	0.25	7.75	2.75	15.5	3	17.75	3.5	1.25	1.75	2.5
3	1.25	1	4.5	4.75	5.5	0.5	8.5	3	16.75	2.25	6.75	2.75	3	2	3.25
5.75	2.25	2.5	9	4	2	0.75	7.25	7.75	21	3	8.75	4	3	2	7.5
5.75	2.5	3.5	10.75	3.5	6.25	1.75	9.5	3.5	12.5	3.5	9.75	2.5	1	2.5	2.75
5.5	2	3.5	7	2	4.25	1	7.25	5.5	17.5	3.5	8.5	5.5	2.75	2.25	8.75
4.25	2.5	2.75	5	3.75	3.5	1	6.25	4.5	22	1.5	12	2.5	4	1.25	2.25
1.5	3.25	2.25	10.75	5.25	6.5	2.25	8	4.75	14.25	2.75	10.25	5	1.5	4	4.5
4.25	4.25	3.5	10.5	3.25	3.75	2.25	7.25	8.25	21.5	1.25	14.25	5	2	2	12.25
4.75	7.25	6	10.5	7	6.75	5.25	6.75	4.75	17.75	2	12.25	2.25	4	3	4.5
2	3	3	8.25	4	3.5	1.25	8.75	6	19	3	10	4	3.5	2.5	4
2.75	3.25	2.25	8.5	4	6	0.75	10	2.75	14	2.25	10.5	2.75	1.5	6.5	2.25
7.25	1.75	2.25	13	5.5	3.5	0.25	5.75	4.75	13.25	0.5	14.75	3.5	3.75	1	4.75
5.5	1	2.75	8	3.5	5.25	1.25	10.75	4.25	19	1	9.5	4	2.75	3.25	7.5
3.75	1.25	1.75	8	4.75	2.25	0.75	7	5.75	18.25	3.25	9.25	3	2.5	2.25	5.5
3.75	4	2.75	10.25	4.25	5	2.5	7.75	9	20	2.5	10.5	3.75	3.5	1.75	8.75
8.5	3	3.75	9.25	2	5.5	2.25	6.5	4.5	18	3.75	12	2.5	2.25	5.25	6.5
5	2	2.75	13.25	5	5.75	1.25	7.5	3	17	1.75	13.5	3	4	3.25	6.5
3.5	2.25	2.5	8.5	3.5	5	1.5	8.5	4.75	21.75	4.75	9.25	0.75	2.75	2.5	4.5
9	4	5	9.25	3.25	6	2.25	7.25	6	18	2.5	10.5	4.25	6	3	7.75
4.75	4.75	4.25	10.75	5	4.25	3.5	11	4.5	17	2.75	11.25	4.75	2.5	7	6.5
4.5	4	4.75	7.75	5.5	3.5	2	9.25	5	14	0.75	12.25	4.5	2.25	4	7.75
8.75	4.75	5.5	10.5	4.5	6.5	3.25	9.75	2.25	19.75	3.75	9.5	4.75	0.75	4.75	3
4	3.5	2.5	8.5	6.5	5.25	2.5	8	9.5	17	2.25	14.75	5.75	4.25	3.25	6.5
8.5	3	3.5	7.25	2.5	4.75	2	9.25	4.5	18.25	4.75	7.5	3.75	2.75	2.25	4.25
5	2	1.75	8.25	5	4.25	1.5	7.5	3.25	13	1.25	15.75	2.75	1	1	3
6	1.75	4	8.75	3.75	3.75	1.5	5.75	3.75	14.5	3.75	10	3	1.75	1.75	3.25
3.25	1.5	4	9	4.25	3.75	2	7.75	2	18.25	2.75	5.5	3.5	1.75	3.5	6
5.75	1.75	2.75	2.5	0.75	3.5	0.75	6.5	8.25	26.75	2	9	5.25	4.5	1	8.5
7	3.5	6.25	11.75	5.5	6.25	2.25	7.5	3.5	14	2.25	11.25	3.25	3.75	2.75	4
7.25	3.5	3.25	9.75	4.5	6.25	3.5	9	5	14.25	2	9.75	5.25	4.25	2.5	2.5
3.75	3.75	2	9.5	5	4.75	3.5	11.5	5.75	30	2.75	16.25	5	2.5	2.25	7.75
11.5	3	0.25	3.25	0.75	4.75	1.75	6	4	21	1.5	13.25	2.75	1.75	2.75	5.5
2	2.25	1.5	5.25	2	6.25	2.5	6.5	2.75	15.5	3.25	9.5	4.5	2	3	3.75
4.75	4.5	2	8.5	1.25	6	2	7.5	11.25	21	3	9.5	4.5	2.25	2	8.5
9	3.25	1	11.5	2	6	1.5	6	5.5	9.25	0.5	11	2.5	0.75	3	1.75
2	4.75	2.25	14.5	0.75	8.25	2.5	5.75	7.5	27.5	0.75	12.25	3	1.75	1	5
1.75	0.75	4	18.75	0.75	4.5	0.5	7.75	3.75	8.75	1	8.25	2	3.5	1	1.5
15	3.75	5.5	16.75	3.5	8	0.5	27	4	9.25	3	15.25	8	4	10.25	4
10	3.5	7.25	15.25	6	8.5	0.75	22.75	4.25	17.5	1.5	17.5	8.5	4	8	5.25
2.75	0.5	0.5	9	1.25	2.5	0	8.75	3.5	17.5	3.25	5.5	3.5	1.5	2.25	2.5
4	0.75	1.75	6.25	1.75	0.5	0.25	7.5	5.25	24	7	10	5.5	4.75	1.75	6.5
6.5	2.25	2.5	10.5	2.25	3.75	3.25	7.75	11	17.75	3.25	18.5	6	3.75	4	9.25
5.5	4.25	3.75	13	4	7	2.5	9.75	5	11.25	3.5	16.5	3.75	1	3.25	3.25
3.5	1.25	1.5	10	2.25	3.25	1.5	8.75	5	16.75	4	12.75	3.75	2.5	5.25	4.25
3.75	2.75	4	14	2.25	7.5	0.75	9.25	9.5	18.75	6.25	10.75	5.25	3.5	4.5	7.25
4.5	1.5	4.25	9	3.5	5.25	0.25	5.25	3.25	23.5	1.75	13.25	2.75	3.75	1.25	7
1.75	1.75	2.75	8.5	4.25	3.5	0.5	7.75	5.25	20.5	2	9.75	2.75	0.25	2.25	6.25
7.25	3.25	4	5.25	3.75	3.75	1.5	6.5	6	23.5	4.25	11	3.25	1.75	2.5	7.5
5.75	4.25	2.75	9	5.25	6.5	1.5	10	8	14.5	1.75	7.25	6.5	1.5	2.25	3.25
4.75	2.25	1.5	15	4.25	5.25	1	9	3.75	16.25	2.5	12	3.75	0.5	2.5	2.5
7.25	5.25	3	13.75	5.25	5.75	3.25	11.5	4.5	11.5	4	9.25	2.25	1.25	2.75	5.25
3.25	1.75	3.75	8.25	5	4.25	3.25	8	5	15.75	2.25	9.25	3.75	2.25	2.25	6.25
3.75	3	4	7.5	3.5	4.25	1.5	7.5	2.75	19.25	2.25	9.5	1.75	2.25	2.5	4.75
7.75	3.5	4.75	7.75	4.75	4	2.25	9.75	3.25	19	2	12.5	1.75	0.5	3	4.75
8.25	2	4	9.5	3.25	5.25	1.5	9.5	10.5	22.25	3.75	12.75	4.75	2.5	3	10.25
6.5	3.25	3.25	9.5	7	4.5	1	10.25	5	9.25	2.25	8.5	3.5	1	2.75	3.5
4	2.5	5	5.25	2.75	7.25	2	7	5	23	3.5	13	6	2.75	1.75	7.5
6.5	2.75	1.5	6.5	3.5	5.75	2	5.75	6	23.75	1.75	11.5	2.5	4.75	2.25	5.75
4	5.25	3	12	6	9	2.25	9.75	7.5	16.5	2.5	13.5	3	2.75	3.5	5.5
2	3.25	5	9.75	3.75	4.5	2.75	8.25	4.5	12	2.75	11	4.25	1	3	5
4	1.75	2.75	9.5	4	3.75	1.25	10	7.75	17.5	2	17.25	4.25	2	2.75	3.75
7.25	1.25	1	7.75	4.5	5.75	1.25	7.75	4.5	18	2	8.75	3.75	7.5	1.25	6.5
2.25	1	3.75	5	5	2.75	1.25	8	4.25	17.5	1.5	10.25	3.75	4	1.5	5.25
9.5	3.25	1.75	7.25	1.25	4	0.75	9.75	4.75	18.25	3.5	12.5	2.75	2.75	1.5	5.25
3.5	1.5	3.25	7	4	1.5	1.25	7	2.75	21.75	2.75	10.5	4.5	2.75	2	6.25
2.25	2.5	1	10.75	2.5	4	1.5	9.75	3	12.25	1.75	12	2	0.75	3	4
9.25	3.5	4	7.75	5.25	6.75	4	6.75	4.25	16.5	2.5	12.5	4	2	3.5	6
7.25	2.25	4.25	10	6.5	5.25	3	5.75	3.5	18.75	4	7.5	1.25	1	0.75	4.75
6	3.5	2.5	9.25	5.25	6.25	2	6.75	6.25	17.5	2.25	11.75	5.25	5.5	2	9.75
3.25	2.75	1.25	8	4.25	2.75	1.25	10.25	5.5	17.25	1	10.5	2.25	2	3.75	3.25
2	3.25	1.25	6.5	3.25	6	2.75	7.5	4.75	18.5	1.25	11.75	4.25	1	2	8.5
3.25	0.75	1.25	8	2.75	3	0	11	4	17	2	8	1.5	1.75	2.75	2.5
3	1.25	0.75	9.5	4.25	3.75	1	11.5	5	18	2.5	9.5	4	2.75	2.75	6.5
4.5	2.25	4.5	13	5.75	6.75	1.5	7.75	3.5	11	1.75	16.25	3.5	2.5	1.75	4.5
11.25	3	2.75	6.5	3.5	4	1.5	9.5	4	15.25	2.75	7.5	2	2	2.5	5.25
3.25	4.25	3.5	7.5	5	4	2.25	8	4.25	25.25	3.75	14	3	3.25	2	5.5
3.5	4.25	5.5	8.25	5.75	6	3.75	7.75	4.75	12.75	1	11.75	4.75	3.75	1.75	4.25
6.25	1.5	4	8	1.25	2	0.75	7.5	10.75	22.25	3.75	10.75	4.75	4.25	1.75	10
5	4	4	7.25	4.25	6	1.75	9.25	4	28.25	2.25	12	4.5	4.75	3	6.75
5.5	3.25	5	11	3.75	7.25	3.5	8	8	24.25	2.75	16.5	3.75	8.75	3	6
5.25	1.75	2.75	8.75	4.75	3.25	0.75	4.25	6.75	17	0.5	15	4.5	4	2.5	5.25
5.5	1.25	2.5	7.5	3.75	4.25	0.25	5	3	16	2.25	12	4.75	2	2.5	7.5
4.75	1	4.25	4.5	3.75	4.75	1.5	8	3.5	12.5	3.5	6.25	1	1.5	2.5	3.75
9.5	0.75	5.75	8.75	4.5	4.75	1	11	4.25	20.25	4	17.25	8	3.25	4.75	7.25
10.25	3.25	2	10.75	1.75	4	0.5	19.5	10.5	41	3.5	28.5	8	8.75	6	7.25
1.25	0.5	0.25	12.25	4.5	1.75	0.25	9	5.75	11.75	2.25	14	5.5	1.25	2.5	2.5
3.5	3.5	2	10.25	2.75	5.5	1.25	10.25	6	18.25	2	6.25	4.75	3.75	1.5	7.75
6	4	3	10	3.75	4.75	0.75	7.5	6.5	23	2.5	11.75	3.25	2.5	1.75	8.75
5.25	2.75	3.25	10.25	3.5	5	1	7.5	7.5	20.75	3.5	9	4.25	4	1.5	4.5
5	2	2.5	14.5	5.5	7	1.5	7.25	2	10.75	2.75	12	1.75	1.25	3	2
3.25	2.75	3	7.75	3.25	4.25	2	8.25	4.75	22	3	13.75	3.75	5.25	2.75	6.5
3.5	3.75	2.5	8.75	3	4.5	1.25	6.25	9	17.75	0.25	10.75	4.25	1.75	2.5	10
2.75	1.75	2.25	6.5	5	4	0.75	11	5	14.75	2.75	11	4.25	3.25	4.25	1
5	1.75	3.25	6.5	4	4.25	2.75	9.25	11	19.75	2.75	10.75	4	4.75	1.5	8.25
4.25	4	3.75	10.25	3.5	5	0	10.5	3.25	19.5	3	12.75	4.75	1.25	4.25	3.75
4.75	2	3	7.25	4.25	5.5	2.25	6.25	4.25	21	1.75	10.25	4.25	2.5	2.75	3.5
3.75	1.25	2	11.75	2.75	2.5	1.25	11.25	5.5	14.5	1.25	9	4.5	3.75	4.5	2.5
4.5	0.75	1.75	9.5	4.75	2.5	1	7	4.25	14.75	3.25	11	3.75	1.75	1.5	5.75
3.75	2.5	4.25	11.75	2.25	5	1.25	10.5	4.5	17.25	3.75	10	2	1.5	3.5	3.75
4	1.5	1.75	7.75	3.25	5.75	1	7.25	4.25	19	2.25	17	2	1.75	2	7
4.25	1	1.75	8.75	4.5	4.75	1	10.75	4.25	13.75	1.75	9.25	1.75	2.25	4.25	3.75
3.75	4.25	2.75	8	4	5.75	1.25	8	2.25	23.25	0.75	17	0.75	2	1.5	1.75
4.25	1	3.25	6.25	2.75	5.25	1.25	7.25	7	17.5	4.75	5.5	3.25	5.25	2.75	6.75
2.5	3	1.5	8.75	5	3.5	0.75	12.5	3.5	8.5	1.5	6.5	5.75	1	5.5	2.75
5.25	2.5	4.5	13.75	6	5.75	3.5	10	5.75	17.5	2.5	6.75	3.75	2.5	4.5	5.25
5.75	4.5	2.75	8	6.5	7.5	2.25	8	5.75	17.5	3.5	16.25	2.5	8	1.75	4
1.75	4.5	5.5	7.5	6.75	7.5	2.5	8	7	28	0.75	9	3.25	3.5	4.25	5
6.25	1.75	2	8.25	3.75	5.5	1.5	10	6.75	23	3.5	19.5	3.25	1.75	2	7.25
5.25	4.5	2.75	6.75	3	6.25	1.75	6.75	7.75	18.75	2.75	11	3.25	5.25	3	9.75
3.75	3.25	3.5	5.75	7	3.75	1.75	8.75	8.75	24.25	1.25	9.25	3.25	3.75	2.5	8.25
3.5	2.75	2	10.25	7	3	1.25	8.25	3.25	13	0	14.5	1.5	1.5	0.75	3.5
7.25	1.5	1.25	8	3	5.5	1	7.25	3.25	11	3.5	12	1	0.5	4.5	3.25
4	1	2.25	6.75	4	1.75	0.5	6.25	4	15.75	4	7.5	3	2.5	2	5.25
7.5	3	3.5	8.5	3	5.75	2.5	8.25	3	22.5	1.75	9	2	2	1.5	3
3.75	2.5	2.75	5	2.5	4.75	1.5	8	4.25	22.25	2.5	12.25	2.25	1.75	1.5	7.25
7	2.5	1.25	6.5	6.25	2.75	0.5	8.25	4.75	19	3.25	8.75	3.25	3.25	2	5.75
7.5	4	5	8.5	3.5	5.75	2.5	8.25	5.75	22.5	3	15	2.25	3.25	2.25	6.75
3.25	2	2.25	12.25	2.25	4.25	0	15.25	4.5	13	1.75	5.75	6.75	1	4.25	2.75
2	3.25	2	7.5	2	3.5	2.5	11.5	9.75	14.5	1.75	13.75	4.25	3	2.5	8.5
0.5	2.5	1.75	8.25	6.5	7	0.75	7.5	8	6.5	0.75	10.25	3	2.75	2	4.5
2	3.75	1	7.25	3.5	5.25	2	9.25	8	13	1	10	3.5	2.5	1.75	3.5
8	3.25	1.75	10.5	4	6	1	6.75	9.5	17.25	3.25	11.75	7.75	4	4.25	3.75
8	1.5	0.75	6.75	2.5	3.5	0.5	11.25	10.25	13.75	4.25	9	6	3.5	2.75	2
0.5	1.25	0.75	6	0.5	2.5	0.75	10	6.5	16.25	1.5	9.75	5.75	1.5	2	2.5
6	1.75	2.5	7	2.25	2	0.5	8	5.5	15	6.25	6.75	7	2.25	2	5.25
1	1.25	1	9	1	2.25	0.25	10.5	6	10.75	2	7.25	4.75	1.75	1.75	5.25
2.25	1.5	1	11.5	3.5	2.25	0.25	5.25	8.25	16.5	2.75	15.75	3	1.25	2	2.75
8.75	1.75	3.25	7.5	2.75	3.5	1.75	7	6.5	15.5	8.5	7.25	4.5	2	3	4
12.5	2.25	2.75	5.25	2.25	3.75	1	4.25	11.25	20	5	14.25	5.75	5.75	2.25	9.75
8	4.5	4.25	10.75	3.75	5.75	1.5	12	7.25	14.75	4	11.5	3.75	3.75	2.25	6
4.5	3.5	2.5	8.5	6.25	4.25	1.5	10.5	3	20	0.5	5.75	4	1.5	3.25	2
6.25	2.25	4	9.75	4.25	4.5	1.75	8.75	6.5	19.25	5.5	8.5	2.75	1.75	2.5	3.75
5.5	3.25	3.25	9	5.25	5.75	3	5.5	8.5	22.5	1.75	9.75	4.25	5.5	2	8.25
4.5	5.25	5.25	12	5.5	6.75	3.25	8.25	3.25	13.5	2.5	11	2.75	4.25	3.25	3.75
6	3	3.25	7.5	7.25	5.25	2.75	8.25	3.5	20.75	2	7.25	2	2	0.75	4
3.25	2.25	1.75	10.75	4.25	5	1.5	13	4.25	10.75	1.25	8.25	4	2.75	3.75	6.75
6.5	4.25	7	11.75	8	6.5	4.5	8	11	21	4.5	14.75	6.25	6.25	2.75	10.5
6.5	3.75	3	9.75	4	4.75	2.5	9.25	7.25	20.25	3.75	9.5	2.75	13	3.5	4.5
4.5	3	3.5	8.25	4.5	5.25	3.25	10.5	6	18.75	2.5	8.25	5.25	3.5	5	6.75
4	6.25	3.75	8.25	5.75	5.25	3.5	10	7.25	12.25	1.5	14.5	2.5	2.75	2	1.75
6.5	7.5	3.25	10.75	2.25	9	3.5	7	8.25	11.5	3	6.5	3.25	1	2.75	3.25
2.75	7	2.25	16.25	4.5	9.75	3	9.5	14.5	17.75	2.5	9.5	5.25	4.25	3	8.5
16	6.25	2.75	19.5	9	8	0.75	8	7	15.75	0.75	9.5	2.5	1.25	1.5	3.75
9.5	7	0.75	17	9.25	11	1.5	10.5	7.75	12.75	2.25	3.5	5.5	1.5	2	2
11.25	3.25	5.5	19.5	1.75	9.75	3.5	10.5	8.5	12	2.75	8.5	4.25	1.5	6	3
12.75	4.25	3.5	21.25	2.75	6.75	2	13.5	19.75	16	6.75	17.25	9.25	4.25	6.5	6.5
4.25	8	4.75	21.75	4.25	11.25	3.25	9.25	22	21.75	7	15.75	8.75	9.5	5	8.5
5.5	6.25	3.5	14.5	3.25	9.25	3.25	9	16.5	13.25	2.75	18.75	4.5	9	3.75	5.25
13	3.5	9.75	19.5	7	7.25	4	13.5	20.25	20.75	3	17.5	9.25	8.75	5.25	9.5
10.25	6.5	8	19	11.75	6.25	4.75	12.75	32	18.25	6.25	20.75	8.25	9.25	8.5	14.75
9.5	12.25	8	22	7.75	9.25	3.5	10.5	15.5	9.25	4.25	10.25	10.5	3.75	9	5.25
3.25	10.25	3.25	16	8.5	6.5	6.25	7.5	17.25	12.75	3.75	9.5	4.75	2.75	4.25	7.5
3.25	10.75	2.25	16.75	9	6.5	5	14.5	18.75	11	3.25	14.25	7.25	6	4	7.25
7.25	10	3.75	19	6.25	7	1.75	7.5	14.75	8	3	7	9	3.75	5.5	5.5
9.75	5.5	4	25.5	4.75	6.5	2.25	6.75	13.25	8.5	2	7.5	6	3	4.25	6
5	4.75	6.5	19.75	3.75	8	1.75	5.75	21.5	14.75	4.75	20.25	8.75	7.5	5.75	13.75
11.5	5.5	9.25	21.25	2.5	8	4.25	8.75	23	9	3.5	15.75	10.5	4.75	5	8.25
9.5	5	8.75	18.75	6.25	8.5	2	7.5	25.25	11.75	5	8.25	9	3.5	6.75	13.75
6	5.5	8.5	15.75	3.25	6.5	3.25	4.25	15.75	15.25	3.25	7.5	9.5	3.25	3.75	10.75
14.5	6	3.5	24.25	5.5	8.75	2.25	10.5	20.25	7	4.75	8.5	8	2.5	7.25	3.25
8.75	10.5	3	30.75	10.5	8.5	3.25	9.75	13.25	11	4	13	8.5	2.5	10.75	4.25
10.5	8	3.75	20.75	6	7.5	1	4.75	8.75	15.75	3	6.25	8.5	1.5	5.75	4.75
7.5	4.5	3	17.25	10.25	12.5	2	9.75	17.25	15.25	8.75	15	8.75	5.5	5.25	10.75
11.75	7.75	9.5	18.5	8.25	8	6.25	16.25	25.75	13.25	7.25	21.5	15.5	7.75	10	10.75
11.5	8.75	7	21.25	11.25	6.25	4.5	17.75	21.75	10.5	4	18.25	14.25	10.5	4	8
5.25	10.25	3	11.5	12.75	8.75	5.25	15.5	25	17.75	4	17	11.25	6.75	5.75	7.5
8.5	9	6	9.25	16.75	8.5	3.25	12.75	22	29.25	5.75	20	13.25	8.25	8.75	14.25
7.75	7.75	6.75	12.75	6	8.75	4.25	16.75	28.5	29	4.5	22.5	12.75	6.25	7.25	11.5
5	11.75	5	12.5	12.5	10.75	5.5	13.75	13	19.75	5	17.25	6.25	2.5	5.5	9.25
22.75	6	2.5	14.75	16.25	25.75	4.75	11	25.75	13	5	21	12.75	4.75	9.25	6.5
14.75	7.25	7	13.75	18.25	8	3	7.5	31	18	6.75	13.5	14.25	4.75	11	13.25
13.5	7.5	6.25	22.25	13.5	7.5	4.5	10.5	19.75	8.75	4.25	10.5	5.75	2.75	4.25	9.25
15.75	7.75	14	28.25	7.5	10.75	1.5	8.25	15.5	6	4.5	15.5	14.25	3.5	8.5	8.75
2.5	5.75	7.75	13	8.5	6.75	1.5	7.5	14	6	4.5	16.5	10	1.25	4.25	12.75
17.5	1.25	3.5	20.75	2.25	5.25	0.5	15.25	14.25	14.5	7.25	16	9.75	2.25	5.5	5.75
8	1.25	0.75	9.5	1	4.5	0.75	13.75	8.75	12.5	4	6	6.25	1.5	2.5	6.25
3	2.25	1	11.75	4	3	0.25	8.5	7.5	24	4.25	16	7.5	5.75	2.5	6.5
7.75	1.75	1.5	10.5	3.5	1.5	0.25	7.5	9.75	26.5	6.75	12	6.5	4.5	3.25	8.75
5.75	1.5	0.75	10.75	4	0.75	1	11.75	9	19.75	5.75	7.5	8	4	2.25	6.25
3.75	1.5	1.75	13.75	3	2.75	0.75	7	3.5	13.25	5.5	6	5.25	2.75	3.5	4.5
9.25	2.25	5.75	13.25	4.25	7.5	0.75	9.5	6.5	14.5	4	12.75	5.25	3.75	5.5	3.5
1.5	1	1.25	11	3	4.75	0.75	9	7	17.5	3	12.5	3.5	0.5	4	4.25
5.75	3	1.75	11.5	6.25	3.75	2.25	10	5	14.75	5.25	14.5	3.5	3.75	3.75	7.25
3	1.75	3	9.5	3.25	3.25	0.25	9.25	5	20	3	9	3.75	0.5	3	4.5
6	2.25	5.5	6	4.5	4.5	1.25	8.25	10.25	25	5	5.5	4.5	2	2.5	10.75
4	4.5	4.5	10	5.25	4.5	2	11	3	13.75	5.25	10	6.25	1.5	5	2.75
8	3.5	4.25	11	3.5	6	4	10.5	6.5	17.75	2.5	8.25	3.5	2.25	5.25	3.75
8	4.25	8	8.5	6.25	6.25	3.75	7.25	11.25	26.75	4	11	5.25	5.5	4.75	10
5	1	2.5	6.25	6.25	2.75	0.25	5.75	8	15.75	5.25	16	5.25	2	2.5	3.75
5.25	1.75	1.75	7.25	2	2.25	0	13.75	5.75	9.5	3.5	8.75	5.25	2	3	0.75
2	1.75	1.25	6	3.25	3.5	0.5	10	5	12.75	3.25	15.5	5.5	0.75	2.75	4.25
6.75	1.5	0.75	7.5	3	2	0.5	8.5	4.75	18.25	3.5	10	3.75	2.5	2	4
2.5	3	3.25	11	5.25	5	2.25	7.5	5.5	16.75	4.25	11.5	5	4	1.5	7.25
5.5	2	4.5	10.25	3.5	4.75	2	7.5	7.75	29	5.25	11.5	4.25	4	2.5	9
6	4	4.5	10	4	5.75	1.5	9	7	11	3	6.25	7	1.5	2.75	6
4	3.5	2	10.25	3	3.75	1.5	14.25	3.5	14	1	12	3.5	2.75	5.5	3.75
8.5	3.25	3.75	7.25	7	4.75	2.25	7.25	5	18	1.25	7.5	4.25	1.75	2.5	5.25
1.75	2	1.25	7	4.5	3.5	1	4.5	3.25	16.25	3	12	3.5	1.5	1.75	8
3.25	2.5	2.75	9.5	4.5	5.25	0.75	8.75	6.25	16.75	1	8.25	5	3.5	1.75	5.75
7	2.25	3.5	8	3.5	3.75	1	9.25	13.25	25.75	4.5	8.5	3.75	4.75	2.75	9
3	2.75	4	8	2.5	5.75	0.75	6.5	4	16	4.25	11	3.25	2.5	1	3
2.5	1	0.75	5	5.5	2	0.5	8	4.75	19.25	2.25	15.75	3	4.75	0.75	3.5
2.5	0.5	1.25	6.5	3.75	3.25	0.5	9.25	6.75	20.5	1.75	10.5	3.25	1.75	2.5	4.25
6	1.5	4.25	7.75	1.75	2.5	0.25	4	4.75	19.5	2.25	12.25	3.75	1.75	1.75	6.25
7.75	3.25	2	6.75	4	4.5	1.25	6.25	6.5	22.5	2.75	10.75	3.5	2.5	2.25	7
5.75	3.75	2	12.5	4.25	5.25	2.25	10.25	2.75	18	3.5	11.25	2.75	1.5	5	3
1.75	2.5	3	10.5	5	4.5	1.25	8.25	4	11.5	2.25	13	4	2.5	2.5	4
4.75	3.25	2.75	7.25	3.75	3.25	0.5	4.75	11.25	27.25	1.5	9.25	2.75	7.25	2	11
2.75	1.75	1.25	6.5	1	3.25	0.5	8	3.5	12.25	2.5	13.5	4.25	1	2.75	5
1.5	2.25	1.25	6.75	3	4	0.75	11.5	2.5	15.25	3.25	11.75	2.25	2.5	3	3.25
1	1.5	0.5	4.75	3	4.5	0.5	5.5	6.5	13.25	4.25	6.75	3.75	2.5	4.25	4
2.5	1.5	3.5	6.75	3.75	2.75	0.75	10.25	6	10.5	1.5	8	2.25	0.5	1.75	4
8.5	2.25	4.5	7.5	2	6	1.5	4.75	11.25	20.5	3.5	9.75	6	4	1.5	5.75
8	4.25	3	5	2.25	5.25	2	7.75	3	18	1.75	5.75	3	2	3.25	2.5
1.75	2	2	8.75	4	5.5	1.75	8.25	3.5	17.75	3	12.75	3.75	4.25	1	5.5
5	2.5	4.5	6.75	4.25	5.25	2.25	7.5	4.5	13	2.5	9.5	2	2.25	4.25	4.5
3.75	2.25	1	3	3	8.5	1.75	5.75	6.25	13.5	1	6.25	2	2.75	1	4.75
11	0.75	5.5	6.75	1.75	3.25	1.75	8.75	7	29.25	6	14.25	4.75	5.75	1.75	10.25
4	2.5	2.25	7.25	2.5	4	1.25	6.75	4.25	11.75	1.75	16.25	4	2	3.75	3.75
4.5	3.75	3.25	9.75	3.75	6.25	3.25	8	3.5	19.25	1.5	14	2	3.5	2	4.5
7	3.25	3	7	4.75	7.25	2.25	5	10.25	18.25	0.75	17	1.75	2.75	1	9.25
3.5	2	3	4.75	3	3.25	2	3.5	6	19.5	3.25	8.75	2.25	2.25	2.25	11.25
2.5	3	1.75	4.5	2.25	4	1.75	8.5	3.75	9.5	2.5	8.75	1.5	1	3.5	4.25
4.75	1	2.5	4	3	2.25	0.5	5	3.75	18.75	1.5	13	2.75	3	1	2
4	2.5	1.25	5.5	3	4.25	1.75	6.25	3.5	13	2	7	1.25	5	0.5	5.5
5.25	2.5	3	9.5	5.25	5.5	0.75	9.75	6.5	15.5	1.75	11.5	2.5	8	3.5	4.5
8	1.25	3.5	9	4.25	5	1.25	6.25	4	11.25	1.25	12.5	3	2.75	2.75	2
8.75	1.5	3	5.5	1.25	2	0.75	8.75	8	22.75	1.75	7	3.75	4.75	1.75	7.25
2.75	4.75	6	7	4.5	7.25	3	7.75	4.75	9.25	3.75	10.25	2.75	3	3.5	3.25
8	1.75	2.75	5.75	2.75	5	0.5	5.25	6.25	16.75	3	13	2.75	4.25	2.75	9
4	1	0.25	6.25	4	3	0.25	6	3.5	14.5	3.25	8	3.25	1.5	0.25	4
4.5	1.25	1.75	5.25	1.25	1.75	0.5	5.5	3	17	2.5	10.75	2.5	0.75	0.75	6.5
3	2	1.75	5	2.75	2	2.25	8.25	2.25	17.5	2	7	3	1.75	1.75	6.75
1.75	1.75	2.75	10.25	3	6.25	1	5.5	3	16	3	10.5	3.75	1.25	3.25	5.25
5.75	1.25	2.75	3.75	4.25	3.25	0.75	6	6.5	25.5	1.75	17	4	3	1.5	9.75
3.25	2.5	1.5	4.25	1.75	5.25	1.25	5.5	5	22.5	2.5	12.25	3.75	1	2.75	2.75
3.75	2	2	5.5	4.5	3.5	0.25	9.25	2.5	16	2.75	15	3	2.5	0.75	2.5
7.25	2.5	2.75	10.25	4.25	4.75	1	7	3	12.5	1.5	11.25	3	0.5	2.25	3.5
3	3	2.5	4	3.5	4.75	2.25	4.75	6.5	15.25	3.25	9.75	3.5	2.75	1.75	5
4	1.25	1	2.5	1.5	2	0	5	10	18.5	3	6.75	3	4.5	2.5	8.75
3.25	2.25	2.25	5	2.5	3	2	5.25	3.5	20.25	2.75	9.25	2	2.75	2	4.25
3	2.5	2.5	6.75	2.5	4.25	2.75	6.75	2.75	19.25	1	15	1.75	2.5	2	6
1.25	2.75	2.25	6.25	5	5.75	2.5	7.75	3.5	15.5	2.5	7	2.75	1.75	2.5	4.5
5	3.25	5	7.75	4	7.5	4	10.75	7.25	21.5	2.25	16	2.5	6	3	4
4	0.25	1.25	4.5	2.25	2.5	0.25	5.25	4	16.5	1.5	15	5.25	5	2	7.25
8.5	2	2.25	3.75	5	3	1	5.75	9.75	23.75	4.25	11.5	3.75	2.75	0.75	8.25
2.25	1	3.25	5	2.75	2.5	0.5	6.25	3.75	24	1	12	3.75	1.25	0.75	6.5
3.5	1.75	3	8.5	4.5	4.25	1.25	8.25	3.75	18.5	1.75	10	2.5	3.75	2.5	3.75
5.25	3	1.75	9.5	4	5.5	1.25	6.25	6	17.5	1.75	13	0.75	4.5	2.5	5.75
7.5	2	1.75	4.75	4.25	6	2.75	10.25	4.75	10.5	1.5	9.75	4.25	3.5	2.5	3.5
3	3.5	2.5	6	3.75	6	1.75	8.25	7.5	18.75	0.75	8	3.25	3	1.25	6.25
5.5	2.5	1.75	5.5	3.5	4.75	0.75	9.75	4.25	17.5	3.75	12.25	1.5	0.75	2.5	3
3.25	3	2.25	8.25	2.75	4	1	9.25	3.5	18.5	2.5	15.25	3.5	0.5	1	4.5
6.75	4.75	4	8.75	5	5.5	2.75	12	2.5	19.25	3	11.5	3	3	2	4
5.25	3.75	4.25	7.5	5.75	5.25	3	7.5	5.5	18.5	3.25	9	6	4	4.75	9.25
8.75	2.5	3.5	9	2.5	3.25	1.25	17.25	9.25	13	3.25	17.5	7.5	2.75	3.5	4.25
1	1	0.25	7.75	0.75	1.5	0	7.75	5	13.5	1.5	10.5	3.75	1.75	0.75	1.5
2.5	0.75	0.5	10	3	2.5	0.5	6.25	5.75	19.5	5	13.5	2	3.5	0.75	5
8	1.5	2.25	9.75	1.25	2	0.75	6.5	4.75	15.5	6	6.5	2.75	2	2	2.5
1.75	1	1.25	5.75	1.75	3.25	1.25	6.5	5.5	15	4	5.75	2.5	1	2.25	4.25
4.75	1.75	3.5	11.5	8.25	4.25	1	3.25	3	8.25	1.25	15.25	2.5	1.5	1.75	2.25
6.75	2	1.25	9.25	2.75	4.5	1.5	8.75	9.5	17	4.25	10.5	6.25	3.25	6	8.5
5	1.25	3	5.5	2.25	4.5	0.5	10	3.5	18.25	0.75	9.5	1.25	2.75	1	6
2	3	1	6.25	3.5	2.75	1	7.25	3	17.25	1.5	11	1	1.25	1	7
9.75	4.75	3.75	7.25	2.75	3.25	1.75	5.75	5.25	27	1.5	11.75	1	9	2	3.75
5	2.75	3.75	6.5	7.5	6.25	1.75	7.25	4.75	21.5	1.25	11.5	4.5	5.5	2.75	5.5
1.25	2.5	1.75	6.75	5.5	2.75	1.75	9.75	3	15	2.5	4.25	2.25	3.75	2.5	5.25
7.5	3.5	5.5	6.5	3	5.25	2	5.25	13.25	32.25	4	12.5	5.25	5.25	1.75	11.25
2.5	2.75	6.5	4.75	5	6	2.5	7.5	3.5	12.25	1.75	13.75	3.25	1	3.5	2.5
5	3.75	3.25	9.75	10.5	9.75	3.5	8.25	5	13.75	2.25	16.25	2.5	2.5	2.5	6.25
8.5	4.25	3	5.5	4.25	5.5	2.75	7	4.25	14.75	1.5	18.25	1.75	1.25	1	3
4.25	1	3.5	4.25	3.75	5	1.25	6.5	8.25	23.5	1.75	11.25	3.25	4.5	1.25	8.5
1	2.75	3.75	11	4.5	4.25	2	11.75	2.75	23.75	2.75	9.75	5.25	3.5	3	2.25
2.5	2	2.75	6	2.5	3	1.5	7.75	4.5	22.5	4.5	12.5	3.25	4.5	3.25	7.25
3.5	1.5	4.5	4.75	5.25	6	0.25	6.5	6.25	21	1.75	8.25	5.25	3.5	1	7.75
4.25	2	2.75	5.75	3	2.5	1.75	6.5	2.5	25	1.25	12.75	1.25	3.75	0.5	4.25
4.5	3	3.75	10	4.75	8	3.25	8	3.25	12.75	3	8.5	2.5	2.5	1.75	2.5
3.5	3	3	7	4.25	8	1.5	6	4.25	16.75	2.25	10.5	2.25	2.25	1.25	10.25
8.25	3.5	3.75	9	7.5	9.25	1.75	9	6	19.5	1.25	16.75	4.75	3.25	4	10.75
7	2.25	3.5	6.5	2	4.25	0.75	8	5.75	18	2.75	6.25	3.75	3	5.25	2
4	3.25	2	5.25	4	3.25	1	7.25	4.5	23.75	1.75	9.75	3.25	2	1.5	3.75
2.25	1.25	0.5	4.5	1	2.5	0.25	6.25	2.25	14	3.5	10.75	3.5	2	1.25	3.5
[truncated: 41,201 more rows]
