# Supplementary material for: Global sleep homeostasis reflects temporally and spatially integrated local cortical neuronal activity
Source: eLife. 2020 Jul 2;9:e54148. doi: 10.7554/eLife.54148 (PMC7332296; doi:10.7554/eLife.54148)
Supplement: Figure 1—source data 1. [file elife-54148-fig1-data1.zip › Figure 1/Slow Wave Activity/Slow-Wave-Activity-Mouse-1.csv]

Frontal EEG	Mean LFP	LFP 1	LFP 2	LFP 3	LFP 4	LFP 5	LFP 6	LFP 7	LFP 8	LFP 9	LFP 10	LFP 11	LFP 12
23.056	30.738	31.478	28.371	31.329	21.77	30.225	28.826	18.171	30.277	24.903	37.909	27.741	19.214
29.41	30.326	28.721	20.641	26.836	24.959	20.656	25.556	18.171	31.621	39.726	32.794	34.775	26.319
21.741	15.741	16.512	11.583	15.956	16.731	10.499	12.849	7.6794	21.012	20.496	17.745	16.848	19.594
28.959	29.905	29.195	22.032	27.579	28.401	21.282	26.288	17.252	34.389	38.324	52.886	34.007	24.403
15.608	20.453	22.392	16.168	21.497	22.939	17.143	18.603	13.047	27.429	23.517	17.455	30.812	16.47
30.946	19.592	19.568	13.906	18.485	15.741	19.358	15.281	14.612	21.251	24.828	20.626	16.045	24.957
28.325	18.412	15.708	13.627	16.17	19.128	18.637	14.045	12.974	25.012	24.31	26.702	17.544	25.368
20.851	16.207	14.57	12.748	14.391	18.439	11.732	14.507	10.299	16.673	22.301	18.814	15.519	17.518
21.296	16.207	16.343	13.656	16.533	18.439	11.94	14.877	10.299	19.052	19.97	23.598	19.799	16.354
34.478	20.608	16.921	16.019	15.274	17.168	13.364	14.877	15.329	23.251	28.072	26.816	16.853	21.859
32.694	12.27	12.354	11.364	11.453	12.475	8.0384	11.403	7.8446	17.746	21.054	19.682	16.853	16.003
36.466	19.237	15.736	14.172	15.222	23.656	16.927	15.412	13.679	35.084	30.018	27.549	22.874	23.864
18.569	14.551	12.673	11.399	11.484	16.629	9.7655	10.961	8.1945	15.822	17.123	19.264	19.515	13.959
25.81	24.1	20.628	22.045	23.758	28.831	19.115	17.961	18.384	26.127	29.501	23.139	37.273	19.616
41.551	38.965	31.654	33.628	32.657	48.274	31.809	30.511	31.048	35.02	33.315	36.156	35.163	33.562
28.812	22.813	22.378	20.078	21.138	23.299	18.568	21.066	16.161	24.735	29.976	26.303	30.527	24.331
18.556	25.078	25.499	20.078	25.059	27.991	15.462	21.884	14.673	25.578	29.691	24.666	28	24.968
36.212	39.887	45.409	31.652	39.728	31.497	40.344	36.089	38.43	31.542	43.799	34.665	38.106	44.505
55.772	64.284	70.497	46.73	64.344	66.213	43.684	53.41	38.43	68.965	75.251	70.981	64.394	52.686
36.954	37.704	40.391	31.718	41.32	36.398	24.609	34.215	24.549	56.993	42.245	43.301	44.874	42.388
36.791	32.27	30.848	27.74	30.044	30.688	24.609	26.616	23.351	35.182	43.8	37.396	30.936	28.23
19.314	32.796	35.751	23.991	30.551	32.661	26.451	28.663	20.765	35.979	46.823	38.159	38.333	26.315
27.199	30.061	34.469	23.991	30.213	27.229	21.418	27.584	16.357	25.048	33.133	29.533	31.688	29.071
30.077	49.716	58.148	40.512	54.18	45.829	41.154	34.502	39.216	47.172	59.338	61.153	52.213	37.989
34.632	24.648	23.402	25.983	22.139	26.125	21.725	20.167	22.248	24.309	32.787	26.794	22.657	33.202
23.526	32.408	31.813	28.082	31.507	32.846	23.715	28.106	26.555	32.612	41.799	43.61	34.54	26.247
29.046	29.748	33.15	29.571	33.229	41.136	22.234	26.613	23.476	33.445	44.102	43.158	31.639	30.415
32.181	23.349	24.182	18.294	23.437	23.167	15.961	19.179	15.303	26.513	28.352	53.017	26.323	25.672
24.175	32.653	32.931	29.716	31.267	30.072	22.061	29.879	22.363	35.855	42.608	48.925	38.407	32.375
23.179	30.845	32.931	24.009	31.267	28.239	21.065	25.926	21.72	30.396	41.854	31.496	34.107	26.36
15.88	38.953	43.454	32.622	43.133	34.455	30.149	37.255	26.488	38.654	44.979	34.997	39.907	28.899
20.526	28.985	32.91	27.132	31.848	33.785	25.319	26.936	16.393	25.605	28.282	28.574	32.864	21.858
24.154	50.949	59.705	57.573	61.749	62.94	38.734	48.512	31.972	43.54	30.41	38.482	51.404	35.364
36.036	48.285	49.226	42.591	49.113	41.305	30.995	42.005	26.947	55.121	66.204	52.126	48.643	35.364
19.978	35.81	40.373	34.838	38.809	37.494	26.049	30.356	23.992	36.532	44.231	39.832	46.31	33.896
29.188	50.459	53.181	43.37	53.344	54.149	32.098	41.985	28.11	51.361	44.231	52.907	54.691	37.819
31.526	50.394	57.636	54.752	59.856	51.576	45	53.367	33.457	39.386	34.372	51.69	65.975	54.682
25.114	49.713	45.047	41.812	45.33	40.233	39.248	42.355	26.521	46.279	56.974	64.812	57.54	51.475
25.114	36.254	34.442	30.418	34.962	32.051	23.597	33.588	22.773	44.027	46.936	39.838	46.449	28.75
17.206	34.834	29.049	32.242	29.796	26.75	22.806	29.784	23.11	41.038	48.681	45.588	33.599	30.49
17.768	23.545	23.108	19.056	25.017	22.822	25.033	19.421	19.29	23.11	29.236	24.421	25.001	21.595
28.97	76.783	77.59	69.945	82.021	71.205	65.281	71.06	56.311	56.093	53.101	93.801	75.477	61.198
41.447	64.451	66.38	52.924	63.724	53.413	44.983	55.079	38.413	74.34	84.028	93.801	77.095	61.915
43.647	91.37	81.131	76.436	78.728	74.06	73.908	73.126	67.654	76.705	55.481	66.223	73.991	79.994
30.833	36.284	40.925	35.314	39.875	37.131	27.831	37.375	21.923	40.746	54.294	35.53	48.234	28.293
30.646	37.32	33.211	32.664	33.487	31.602	26.35	32.427	21.553	40.746	41.11	48.424	42.145	31.439
27.759	42.035	40.371	37.136	40.282	40.362	33.079	35.773	29.596	42.106	40.167	50.087	46.93	39.976
38.026	61.429	65.796	57.271	65.495	59.274	39.562	55.377	47.559	60.548	73.993	59.775	69.09	52.084
47.07	63.112	59.797	45.554	54.797	45.348	42.937	51.04	38.073	70.373	79.595	70.031	64.269	62.67
38.588	35.772	42.211	28.936	38.288	46.867	36.919	30.365	34.915	38.167	36.802	43.728	40.807	35.398
25.402	30.739	29.754	26.837	29.083	34.5	22.302	23.995	23.02	32.3	39.074	39.123	31.323	26.56
25.402	60.723	57.002	51.995	54.392	51.509	40.678	48.441	45.555	63.49	67.93	65.779	61.08	57.551
45.231	69.051	57.002	57.661	54.392	52.671	50.617	55.26	45.555	77.383	77.821	82.466	76.762	70.19
28.453	37.614	34.318	32.468	34.325	33.854	27.704	30.755	24.178	45.26	43.755	38.198	32.978	29.082
20.307	24.88	30.945	20.612	27.237	36.54	19.727	21.662	20.456	26.65	36.588	30.621	23.077	21.462
27.847	42.319	39.761	35.909	41.556	36.601	28.568	37.693	28.359	42.53	59.309	43.026	41.197	39.253
26.017	46.349	46.809	35.909	43.135	36.601	32.703	39.688	33.293	48.507	47.337	62.986	40.306	32.853
34.164	27.581	22.427	22.67	23.513	23.475	20.428	22.124	18.353	32.48	38.046	41.762	24.429	29.194
22.393	27.581	22.427	23.262	23.513	23.475	17.123	22.124	18.353	29.214	41.913	35.699	22.631	29.194
30.278	21.628	17.97	16.554	18.407	19.413	15.571	15.97	12.234	30.665	27.664	28.54	20.55	25.51
56.491	36.036	37.48	27.527	34.144	27.44	25.782	27.523	24.212	39.284	47.772	43.936	40.497	38.122
25.333	22.227	18.272	18.135	18.925	19.351	16.647	19.548	14.966	29.453	32.463	25.27	26.252	22.322
33.277	37.589	34.554	32.382	33.627	37.433	31.371	31.228	30.93	39.873	45.11	42.469	45.941	35.042
29.137	28.701	32.127	28.855	30.857	34.916	19.208	26.939	24.984	39.873	31.699	38.749	26.571	26.945
26.476	28.522	29.817	28.855	31.82	34.916	21.675	26.882	24.984	40.471	24.876	24.299	22.87	21.47
30.592	28.522	26.892	28.001	27.895	28.692	21.675	25.385	20.557	40.447	36.195	27.793	31.898	21.47
29.305	51.892	51.898	37.112	49.577	55.211	45.908	31.082	40.822	52.86	41.129	46.534	43.675	48.914
23.457	31.432	33.012	28.742	33.115	35.67	22.051	26.863	22.767	32.675	39.912	36.79	31.844	30.876
24.331	22.924	18.938	19.141	19.788	24.352	17.381	17.223	16.244	22.424	27.555	62.868	21.125	30.151
11.746	15.42	14.246	12.841	12.228	22.511	12.576	13.263	10.545	17.409	21.194	17.218	17.19	18.744
25.95	17.089	16.53	13.916	15.1	23.904	13.388	14.752	12.107	18.7	27.032	22.759	19.574	17.371
22.418	33.648	34.754	30.527	36.668	51.285	23.441	30.965	22.919	23.971	29.559	44.196	30.841	23.37
14.161	33.648	39.838	32.072	41.687	56.751	26.98	32.06	26.097	25.894	28.562	32.246	44.648	22.14
40.199	45.031	42.505	40.973	42.139	40.089	27.43	38.847	25.28	46.387	50.583	32.246	48.976	32.197
29.722	33.027	36.992	31.1	36.412	33.007	26.991	29.071	25.28	30.608	37.916	36.968	31.646	34.574
32.282	30.673	25.276	23.073	28.16	33.294	20.292	24.449	16.919	27.089	37.756	34.022	26.295	27.922
30.653	31.086	34.271	28.125	32.151	29.619	22.387	28.329	23.141	27.089	43.761	34.022	33.327	42.153
18.484	31.541	34.271	28.125	32.151	34.857	34.627	30.139	23.141	32.296	43.195	47.212	42.41	28.015
34.242	31.541	33.248	26.317	30.687	23.27	24.254	30.139	18.02	32.296	32.136	47.212	40.165	28.015
32.897	33.911	35.336	37.411	36.979	25.155	25.53	31.667	24.861	31.518	25.724	46.362	40.165	25.667
32.897	47.503	61.929	49.211	55.614	31.932	48.283	50.355	41.926	40.82	40.513	86.792	61.328	33.076
32.618	27.313	29.388	22.502	28.86	15.582	25.18	26.597	16.103	21.13	24.02	23.097	39.262	16.788
27.316	31.966	45.623	32.424	37.579	32.012	28.243	36.54	24.91	22.516	22.283	24.896	44.196	22.258
41.926	63.493	76.531	62.327	74.742	60.281	64.626	53.315	54.857	63.862	54.09	47.869	61.967	51.416
52.453	41.782	47.596	38.166	45.525	44.723	39.251	35.056	33.559	47.9	57.095	42.006	47.432	41.631
30.239	23.176	35.673	21.619	33.236	26.047	15.695	24.081	20.539	25.298	27.834	22.933	31.968	32.964
33.114	31.003	33.788	30.994	36.62	31.385	20.783	39.146	18.819	33.585	31.791	28.908	38.5	25.171
22.633	61.588	71.219	53.493	62.425	71.194	53.697	42.213	48.344	49.407	28.109	37.35	75.434	45.317
29.482	85.159	97.365	73.583	92.107	71.194	106.29	66.902	92.057	80.553	45.668	70.306	97.161	73.223
27.42	49.112	62.304	49.576	65.243	48.029	66.233	51.882	51.572	44.45	34.882	77.845	52.573	33.367
27.788	22.579	34.204	22.8	28.999	48.029	29.698	27.426	24.626	27.662	22.671	18.977	23.271	21.43
31.839	39.918	35.714	31.998	37.111	53.299	35.782	34.16	40.443	47.604	51.043	39.808	44.503	30.271
47.682	32.08	30.632	27.499	30.684	32.199	25.198	28.847	27.813	47.54	46.722	35.447	37.24	21.404
33.252	28.658	23.092	25.025	24.728	20.362	20.638	20.769	19.345	39.951	60.618	36.524	33.84	27.08
48.581	46.294	43.3	32.066	41.934	49.241	40.608	34.471	35.871	41.222	33.665	47.495	42.963	35.837
32.551	69.213	76.7	64.27	78.211	63.355	50.902	57.564	57.351	43.997	47.079	73.128	60.442	42.783
22.681	33.424	40.707	32.99	37.5	33.272	21.549	35.112	24.45	32.713	32.238	33.13	41.719	28.002
31.707	33.424	33.132	29.435	33.016	33.272	24.348	31.225	25.879	32.263	35.342	36.815	41.719	37.066
27.05	45.425	52.684	34.203	45.911	43.674	55.016	30.092	42.79	45.956	37.072	47.515	41.841	46.458
19.1	39.076	44.049	34.547	45.659	46.592	48.452	41.925	38.266	25.266	28.565	30.892	40.203	30.712
56.675	84.806	103.08	73.149	95.614	82.258	94.596	68.678	64.568	59.85	59.675	73.621	74.362	70.612
27.106	43.835	59.666	48.139	49.157	57.108	43.133	55.468	42.371	37.987	41.296	29.455	51.089	37.008
68.987	67.05	89.359	66.02	92.222	80.145	75.969	59.383	67.038	61.977	43.822	45.893	55.187	37.938
12.663	18.429	21.273	18.913	21.517	27.247	22.225	17.402	15.079	39.776	16.307	17.691	29.938	18.888
33.105	27.328	31.762	27.313	31.136	38.757	27.902	24.619	22.69	51.46	38.143	47.464	37.087	29.161
22.369	46.153	47.996	41.122	48.315	39.204	36.809	39.016	28.685	37.691	34.256	44.774	49.1	42.837
14.746	51.478	56.181	47.457	56.582	53.239	51.378	40.808	45.248	38.842	47.795	47.05	52.691	40.757
34.997	58.422	64.625	52.086	61.749	81.894	50.772	50.425	52.506	52.685	56.352	56.151	52.691	44.622
87.4	68.624	69.696	53.212	68.859	60.309	51.516	52.821	39.987	79.407	85.187	108.57	58.929	62.903
62.439	42.652	56.97	44.015	57.135	45.962	27.023	43.739	33.214	46.098	48.703	45.013	55.705	31.627
20.616	38.18	41.125	31.715	37.413	36.191	46.846	34.626	35.554	46.098	45.483	40.379	51.088	42.367
24.877	39.699	42.706	38.426	43.749	62.391	26.854	37.08	26.304	29.269	32.002	35.223	42.3	39.051
28.752	43.247	41.38	31.23	37.863	28.965	27.201	33.059	25.58	49.767	55.356	57.394	40.873	44.982
19.259	47.833	48.321	34.756	42.931	48.902	37.535	43.502	25.58	40.717	42.355	38.49	62.666	23.822
34.048	91.531	93.357	90.821	85.699	100.23	69.874	80.604	54.579	80.142	89.743	81.151	89.274	68.912
37.584	40.941	56.14	57.061	55.333	64.712	40.703	66.73	28.265	41.339	34.323	42.154	36.509	28.496
37.584	56.204	86.717	65.681	86.215	55.843	53.892	63.468	53.351	45.187	92.205	50.807	116.32	38.192
24.397	50.892	57.805	42.592	53.412	40.487	53.892	49.523	50.015	36.14	32.38	50.174	73.568	38.037
40.509	53.684	73.505	54.595	62.732	65.783	41.839	50.076	44.365	76.012	51.758	54.1	56.459	38.389
83.576	50.825	62.479	64.688	58.756	55.574	45.93	69.451	44.589	55.269	49.952	43.127	51.359	42.492
81.908	50.825	62.479	64.688	58.756	55.574	49.091	70.554	44.589	55.269	41.168	38.203	47.652	42.492
24.819	28.484	28.159	23.949	27.812	23.562	29.037	31.628	20.803	31.453	41.168	31.825	28.065	28.686
24.819	23.077	24.356	21.703	24.466	27.922	29.253	27.721	21.3	21.641	25.286	24.666	21.57	17.856
48.958	23.138	31.903	24.142	30.235	43.198	16.15	33.605	14.079	21.641	28.919	24.666	22.355	22.473
109.88	52.638	46.909	38.722	44.675	40.435	46.576	39.515	38.812	46.257	46.896	51.599	55.552	52.997
100.14	67.747	77.506	64.167	75.236	60.282	59.025	61.07	57.955	68.258	73.548	70.241	66.838	54.065
48.816	59.704	83.699	56.418	78.459	67.206	53.731	61.555	52.44	42.56	34.769	55.295	56.963	45.719
50.94	64.571	81.547	46.747	78.032	67.206	57.686	59.105	56.391	56.322	56.65	54.685	71.394	73.327
28.401	56.159	57.781	50.058	55.918	29.112	67.736	49.685	64.396	69.191	35.722	46.651	64.723	59.681
20.822	27.135	29.177	19.881	25.838	19.505	26.698	23.379	23.1	31.916	25.244	27.569	39.115	30.693
48.325	46.48	52.294	42.298	50.821	55.189	39.508	43.064	38.463	39.623	47.971	49.031	98.696	47.404
48.325	83.766	86.276	73.254	70.18	62.141	94.586	75.397	79.159	69.604	80.956	78.635	88.318	66.632
30.48	39.333	44.885	36.965	44.522	32.773	30.222	42.107	33.586	52.893	45.909	47.883	49.228	44.503
67.793	53.126	76.328	69.948	74.329	55.865	43.788	59.51	40.651	46.138	42.488	43.09	57.924	45.118
61.948	42.109	53.639	42.867	48.676	44.64	36.24	42.399	40.651	44.021	33.978	38.573	44.413	34.949
78.528	39.366	50.246	38.701	48.676	44.64	27.152	36.905	42.049	33.442	28.632	37.703	39.437	29.692
40.752	56.898	67.425	44.891	62.794	53.947	45.406	42.095	39.886	69.496	44.014	75.852	65.206	47.278
26.434	36.739	49.042	36.904	54.263	44.248	28.59	46.518	25.789	26.002	22.89	30.693	29.13	34.181
47.928	45.716	49.046	46.745	50.159	31.869	36.718	30.595	46.952	36.375	40.862	40.365	59.831	41.818
55.752	29.131	33.832	32.032	31.292	24.441	20.902	27.854	17.715	28.166	35.479	29.481	32.121	21.257
32.206	22.84	21.171	15.636	21.508	16.526	17.94	16.836	16.049	20.75	25.523	20.371	35.18	21.257
58.414	46.453	41.605	37.135	43.408	36.833	33.292	32.924	30.517	50.922	52.78	51.131	54.819	69.358
58.414	44.73	46.188	43.999	46.675	38.519	33.292	44.923	30.342	39.151	40.136	38.705	52.598	48.856
78.523	57.277	72.833	60.005	67.65	54.674	49.59	61.667	54.052	45.996	43.46	49.075	60.957	41.867
119.01	64.693	72.833	55.735	67.783	62.354	54.565	53.684	53.324	66.849	58.893	55.356	67.046	56.644
54.435	17.526	18.198	14.816	16.561	26.461	13.247	14.362	12.274	18.952	36.776	18.762	21.019	17.052
105.27	49.707	55.021	43.846	55.189	50.914	41.414	43.66	33.524	54.302	59.005	54.859	48.558	45.648
62.814	47.623	60.606	48.422	54.657	39.283	43.566	43.921	55.285	62.875	40.15	39.578	48.36	41.334
39.008	20.924	21.463	18.076	20.067	16.074	19.441	19.12	14.387	23.234	27.63	27.564	24.354	22.766
81.131	21.121	24.707	19.686	24.423	31.729	19.441	19.164	15.196	20.861	24.905	21.203	29.191	22.585
25.576	28.307	27.273	23.161	27.636	22.01	27.615	19.658	26.643	24.261	24.138	29.019	34.963	30.801
38.882	39.296	40.303	31.597	39.479	24.59	32.365	37.11	35.41	34.728	31.689	40.47	46.206	30.801
72.914	64.816	74.914	55.774	68.6	66.672	57.096	52.889	57.903	63.109	65.915	56.292	59.866	59.904
30.644	35.257	35.161	32.235	33.911	31.371	36.081	32.617	33.494	41.377	48.453	44.181	39.052	33.122
24.295	28.493	31.522	25.049	29.03	35.115	25.308	29.296	21.71	25.122	32.222	26.812	38.625	23.589
24.129	22.098	32.028	21.03	30.006	25.364	22.585	31.528	17.254	12.874	22.766	29.329	21.629	11.612
24.129	40.996	44.234	33.001	43.87	27.937	41.773	37.23	27.633	55.421	40.807	70.011	38.219	33.615
20.819	40.996	44.234	33.001	42.383	37.489	30.901	39.857	27.633	56.679	40.807	61.647	35.124	44.136
14.955	38.422	38.819	29.827	37.652	31.699	30.562	32.066	28.252	41.298	42.065	45.647	34.884	39.517
22.778	22.494	23.975	18.682	25.054	28.444	15.093	19.78	15.087	24.587	31.457	27.824	22.716	25.873
11.972	34.514	31.826	31.731	31.034	31.308	38.607	36.249	16.996	33.53	33.526	53.865	34.711	28.302
22.751	39.778	41.623	33.637	39.781	44.135	27.485	38.225	30.541	35.267	33.526	43.372	31.434	30.496
23.195	20.307	18.926	22.884	18.441	33.967	20.217	18.267	23.304	24.891	40.574	33.421	20.63	21.318
19.569	32.232	30.045	25.16	29.043	27.201	28.381	24.654	26.37	33.583	46.036	44.12	31.636	26.994
19.132	33.564	37.148	33.469	40.981	36.511	42.449	33.348	35.967	41.075	55.739	42.091	40.207	30.273
23.129	28.685	30.124	26.318	30.351	30.477	29.942	27.116	27.874	33.82	38.302	36.09	30.189	29.338
27.675	20.778	18.508	18.239	17.785	28.375	18.31	15.936	18.693	22.316	31.204	25.014	17.086	29.386
14.343	62.787	69.744	30.59	53.42	47.05	43.728	40.077	38.902	113	137.86	106.78	52.087	86.773
17.691	42.673	42.645	30.294	37.497	28.354	30.217	37.88	25.149	63.417	89.215	74.765	41.847	50.084
24.946	16.244	17.856	17.832	16.835	19.172	17.869	15.578	15.406	13.358	17.397	15.916	14.959	14.804
16.903	16.517	18.272	18.861	17.011	17.446	12.777	16.229	14.295	16.35	16.63	51.082	21.92	12.896
25.926	24.005	24.936	21.857	24.778	25.852	18.058	21.109	17.082	25.909	23.012	51.082	22.724	29.231
25.926	62.301	51.953	45.572	48.964	51.149	50.98	50.628	47.117	63.482	83.231	77.923	69.075	55.867
25.553	23.484	23.927	22.732	23.078	19.096	25.523	24.216	17.65	40.686	31.816	30.41	27.611	25.533
21.563	18.759	16.929	14.658	17.063	21.408	15.379	15.079	15.223	39.078	27.379	30.963	17.71	22.947
24.46	35.014	26.796	26.657	26.32	34.945	28.79	22.157	23.947	44.415	36.059	48.522	25.408	31.118
26.502	35.088	31.583	29.349	32.2	29.275	25.52	29.373	20.688	41.858	51.913	44.709	39.585	32.01
28.092	55.255	40.788	47.786	42.123	47.621	39.532	44.996	36.883	66.922	75.497	72.3	58.251	55.223
35.77	37.862	36.669	28.916	34.716	33.867	29.471	28.82	27.878	31.518	49.118	39.494	32.893	36.045
35.793	55.682	62.676	45.024	57.266	52.63	38.14	48.818	33.252	51.592	68.116	68.913	53.557	40.966
33.686	34.672	24.851	20.444	27.391	28.54	24.849	24.578	22.053	33.626	42.134	173.76	30.194	25.179
22.745	25.615	22.446	22.399	20.332	21.532	18.954	21.694	17.637	31.216	33.948	30.948	26.604	25.219
20.595	51.602	59.223	50.243	56.548	46.788	49.001	51.851	43.838	47.538	70.915	53.05	41.209	48.318
24.039	30.466	30.416	29.191	31.918	31.787	22.701	33.739	24.01	28.204	38.533	44.044	32.222	26.501
20.3	26.534	28.389	22.467	28.991	43.281	18.769	23.272	23.454	24.875	25.058	34.13	32.222	26.501
31.429	30.846	30.919	26.946	29.923	30.578	26.628	25.029	32.682	59.195	49.084	37.869	36.717	25.099
35.802	51.932	51.019	42.945	48.982	51.621	34.956	44.615	33.061	67.543	66.267	77.205	49.965	68.001
25.759	31.271	32.612	26.89	30.978	32.176	23.425	27.268	20.115	34.243	41.154	36.273	35.069	29.885
45.691	63.563	58.051	54.337	55.724	49.981	48.91	50.764	41.73	62.172	93.72	74.35	63.601	56.473
32.418	51.901	56.339	39.825	51.761	41.609	39.968	50.453	39.172	40.279	42.89	74.35	55.51	44.165
33.407	28.123	32.484	23.81	31.497	23.891	23.271	28.365	22.034	32.155	24.94	37.314	24.891	25.606
41.712	33.371	36.727	29.732	36.995	36.327	26.037	28.911	26.632	29.383	42.365	48.874	28.768	33.411
27.246	27.063	25.933	22.104	26.772	25.541	22.103	25.675	16.307	29.383	42.365	30.63	35.386	25.305
36.536	102	118.23	99.329	117.67	67.364	72.764	106.65	74.977	94.798	86.128	76.154	105	85.33
40.897	50.913	39.194	37.903	40.245	32.018	39.305	43.951	41.417	59.164	72.496	54.456	62.687	43.968
18.719	25.637	26.481	23.532	27.695	23.878	16.18	30.005	17.573	23.893	59.435	25.819	24.338	34.855
18.235	61.963	51.369	46.567	52.606	48.889	45.154	53.424	44.821	61.262	59.435	79.585	54.356	71.543
41.943	127.21	119.22	112.17	128.65	121.19	101.95	115.86	92.461	93.679	95.56	120.62	138.25	113.83
54.072	104.12	93.688	88.585	96.602	84.289	74.875	93.819	75.043	90.543	114.77	114.64	112.96	102.68
30.523	62.084	66.633	57.035	65.352	59.475	56.345	56.051	59.125	61.195	38.791	56.264	67.036	49.569
16.889	46.091	51.161	43.135	48.361	46.018	38.185	50.102	41.536	61.195	38.791	49.862	36.811	48.186
14.62	30.791	34.043	24.881	33.071	23.641	18.313	24.308	19.054	34.35	32.931	80.139	38.374	35.772
22.061	30.791	34.023	24.881	31.275	23.641	17.149	24.308	21.152	31.463	41.961	52.947	30.369	23.21
24.702	43.129	39.519	34.084	35.535	38.356	34.992	34.211	29.56	59.669	61.725	76.498	47.094	43.046
20.147	54.003	44.712	43.243	44.823	50.022	36.925	42.093	37.766	65.587	64.551	87.42	50.918	47.737
23.757	38.361	39.948	31.82	39.639	30.826	31.605	37.962	30.848	39.62	31.233	33.745	43.502	27.396
21.277	22.231	21.421	17.655	18.801	22.128	19.659	15.785	14.88	32.226	30.937	29.97	23.064	22.541
23.761	31.757	29.622	28.681	30.908	32.787	23.761	25.583	21.599	33.103	33.735	34.898	36.918	29.274
22.065	25.578	24.484	19.095	23.045	26.232	23.582	22.19	20.2	27.308	28.428	30.624	23.415	34.631
21.554	31.861	34.607	28.036	32.16	35.109	29.191	30.004	23.185	45.465	38.126	39.342	31.929	37.098
26.427	36.643	40.084	31.738	36.997	44.72	26.028	36.078	23.925	64.339	52.557	42.03	37.276	40.108
24.161	36.832	41.556	28.205	37.943	38.575	25.837	36.078	20.463	42.912	55.314	46.81	46.664	38.688
21.215	31.06	29.612	20.044	28.31	23.906	22.972	26.581	22.209	38.15	37.764	42.714	31.736	30.484
22.117	50.832	54.774	40.194	50.121	54.382	40.629	42.293	33.523	35.029	59.191	70.621	54.78	33.791
20.799	56.1	57.463	47.727	57.582	68.912	53.189	46.877	42.273	46.702	66.428	81.957	56.408	45.278
29.284	50.468	52.065	44.796	49.279	41.786	33.001	48.284	37.083	65.953	67.129	42.247	56.665	46.146
23.693	26.646	27.44	25.603	26.14	36.067	19.006	23.861	18.879	45.627	38.581	23.945	24.711	32.957
34.985	68.717	81.381	61.718	80.557	69.65	55.474	61.428	44.915	62.808	58.431	48.391	72.447	59.746
26.661	42.188	42.297	40.997	42.045	37.101	27.654	36.862	31.883	42.361	45.084	49.397	43.875	41.459
31.3	35.032	35.854	31.79	37.04	40.533	20.979	26.119	26.049	37.191	38.658	43.633	38.829	35.028
29.286	36.93	39.137	29.887	38.406	26.255	28.077	33.769	29.056	45.606	53.167	55.05	45.45	45.132
34.846	55.602	70.748	51.506	64.62	74.401	52.011	54.674	52.71	34.944	51.61	47.999	82.043	52.065
28.657	73.643	92.799	80.114	92.26	110.89	86.202	60.166	70.638	43.925	51.61	37.933	55.582	37.78
42.489	71.068	88.629	65.653	82.768	54.579	50.067	81.488	43.896	64.321	65.026	63.854	79.28	31.993
28.385	57.693	71.368	48.191	62.059	44.397	41.761	47.942	41.194	45.836	45.446	106.43	81.886	45.488
29.945	35.686	38.507	33.138	36.296	29.263	30.234	34.406	27.68	39.503	42.256	49.822	40.066	30.812
16.769	42.335	45.34	35.897	46.992	36.034	37.714	37.456	32.784	33.145	40.726	38.419	48.012	29.665
36.348	28.629	28.773	26.123	29.583	27.229	25.421	27.752	24.435	25.797	33.561	27.004	33.235	29.665
53.054	51.976	71.036	45.831	63.691	63.865	45.663	56.602	42.864	32.703	52.455	68.679	48.367	31.93
19.927	45.161	47.666	40.131	47.169	35.883	29.693	32.41	27.063	32.703	48.719	45.929	48.367	31.93
28.785	40.584	47.007	32.231	46.88	57.635	22.626	35.711	19.991	45.83	58.808	41.032	45.273	25.615
36.233	30.374	31.029	22.865	30.346	28.473	27.908	25.101	22.071	53.138	37.821	37.754	34.245	25.476
27.618	20.51	20.236	16.345	20.386	18.864	20.601	16.794	18.845	23.483	23.755	30.684	23.264	17.695
22.995	53.596	46.111	40.164	44.226	41.909	42.572	41.992	38.301	51.16	56.497	72.628	55.315	59.09
22.798	36.513	38.331	34.505	39.82	52.802	36.194	27.717	19.542	50.133	30.886	34.173	31.026	19.712
22.798	23.751	21.265	26.333	21.446	20.762	20.86	20.937	17.891	38.502	37.711	23.111	23.31	26.293
28.677	28.338	30.758	53.476	32.719	40.073	32.03	26.599	29.617	19.401	21.069	34.583	20.749	23.547
23.393	41.645	43.185	35.653	43.4	34.825	33.642	38.198	35.293	49.56	57.795	50.264	42.743	28.539
23.316	33.826	36.435	32.614	33.734	30.539	22.898	24.545	20.7	33.906	48.717	35.704	34.631	24.47
27.146	35.843	36.435	30.961	33.734	30.539	26.201	28.192	23.626	38.694	43.417	43.066	42.027	34.616
20.436	35.843	35.433	31.007	32.665	30.562	26.201	28.192	23.873	38.496	22.714	37.804	39.096	37.384
39.621	35.16	30.132	28.682	28.905	29.164	28.551	31.056	24.779	39.538	47.304	47.313	29.388	43.778
31.878	31.033	29.783	23.297	27.681	29.408	25.527	31.056	24.096	27.573	40.081	43.633	29.388	39.445
16.916	29.539	24.596	24.236	25.44	32.511	22.129	20.516	22.058	28.937	26.457	47.624	28.949	27.647
23.776	31.516	30.488	28.625	30.258	30.623	20.149	24.237	20.301	45.527	31.012	30.759	35.231	28.585
30.217	32.138	28.731	25.772	26.655	26.808	25.315	24.074	21.725	35.016	38.405	46.959	41.806	32.274
23.611	28.78	26.541	26.681	30.977	32.756	23.214	33.474	18.733	27.267	27.603	34.733	25.249	22.662
39.119	34.714	29.734	28.65	32.049	26.687	24.049	28.524	26.931	37.727	49.063	48.132	37.653	33.809
39.446	37.137	38.581	34.436	36.249	39.893	20.832	32.331	22.822	33.63	36.163	39.785	39.975	28.011
22.438	37.137	36.329	34.436	35.91	39.893	33.474	32.331	22.822	56.782	36.163	39.399	42.62	30.422
22.438	24.723	25.846	25.178	27.241	22.061	20.622	23.144	21.198	26.325	38.193	43.856	27.656	29.225
19.814	44.32	61.079	49.332	43.063	53.778	37.39	42.554	37.757	30.703	49.004	43.988	42.576	30.62
22.77	59.657	66.237	47.672	54.991	54.603	56.569	49.535	53.603	55.582	74.38	66.516	60.003	50.291
33.118	69.25	83.249	81.978	91.398	91.128	56.814	66.975	50.985	52.195	59.178	56.459	72.73	37.772
22.097	59.408	68.548	51.565	67.515	48.652	47.25	48.807	51.819	70.509	52.122	72.26	54.629	33.157
27.221	21.09	21.543	17.913	20.475	24.668	17.632	17.507	15.339	22.327	28.15	23.61	26.783	19.526
29.484	21.539	20.653	18.05	19.672	20.88	15.747	17.925	16.582	26.78	23.746	36.895	29.855	21.375
29.484	34.3	38.44	34.787	40.39	31.606	31.136	41.167	31.639	26.974	26.608	40.556	38.278	35.596
10.067	25.131	22.163	20.568	21.921	20.655	21.186	20.444	21.301	24.124	28.651	40.62	29.978	28.734
20.654	34.533	33.698	25.565	28.334	32.769	31.37	30.184	26.525	35.355	47.432	40.62	37.455	33.366
48.917	37.973	36.611	31.288	35.784	34.229	23.039	31.864	21.008	35.564	43.336	46.572	44.532	32.79
44.785	39.694	40.081	36.581	41.854	58.86	31.246	36.049	28.137	84.284	89.276	49.692	45.381	49.749
26.183	27.48	37.25	30.796	34.83	29.63	24.026	33.975	20.252	23.543	26.168	28.888	24.514	28.664
18.834	23.32	25.135	24.994	31.821	24.365	19.743	26.038	17.753	22.802	25.6	24.919	19.523	21.355
13.097	29.178	40.715	27.36	40.939	42.342	25.136	29.665	17.912	20.238	36.808	31.314	19.539	31.695
6.3882	18.379	20.029	20.768	20.874	21.469	18.871	17.872	19.153	18.617	23.928	25.203	19.74	15.827
17	14.719	15.934	15.433	16.554	14.654	17.262	15.884	15.108	14.4	18.448	19.878	13.9	16.436
27.24	53.992	74.159	54.547	69.185	72.367	42.067	56.394	44.261	39.947	53.759	60.251	40.929	43.082
25.348	32.253	33.692	31.135	33.528	41.358	28.778	26.103	25.281	25.514	31.932	46.789	23.233	28.424
39.283	30.901	35.63	29.869	33.528	31.088	25.629	31.8	25.372	26.746	34.92	29.688	23.122	29.127
29.229	17.784	20.797	20.511	21.228	29.901	13.774	20.373	9.1316	18.517	23.764	21.664	18.07	18.774
23.678	24.049	25.915	21.941	24.139	29.901	21.241	25.339	17.491	24.461	45.715	36.187	25.07	18.696
23.678	21.983	19.597	13.266	19.113	28.211	24.525	15.625	17.432	30.439	31.502	21.767	20.295	30.659
12.266	29.082	36.708	27.226	34.931	34.708	23.632	27.758	22.112	30.439	28.938	27.396	35.334	27.31
62.267	81.283	85.742	73.513	79.268	105.02	57.592	76.765	58.589	73.276	75.894	86.076	76.915	62.865
22.06	51.284	52.65	47.048	55.223	53.175	35.006	50.323	35.908	43.154	44.75	60.773	46.558	34.181
22.06	79.008	80.034	74.539	79.142	66.867	71.231	68.043	62.743	89.736	63.457	81.49	74.088	63.675
41.839	58.304	57.404	49.572	56.327	48.472	41.662	47.404	39.239	64.386	56.447	65.165	63.925	54.519
36.955	40.097	38.795	31.704	37.085	47.376	37.739	36.495	27.328	54.97	53.624	54.436	37.381	39.13
16.274	33.803	31.711	26.883	33.123	30.324	25.201	28.31	22.42	23.28	40.547	40.726	31.441	21
43.092	39.707	32.09	25.559	31.673	35.977	36.747	28.88	27.048	38.873	67.067	85.77	37.898	40.78
34.198	23.205	30.509	22.698	23.71	23.726	19.34	24.927	13.326	27.135	49.282	39.215	18.336	32.979
16.745	18.918	20.86	17.388	21.322	32.097	20.031	15.852	15.66	19.314	25.786	21.078	15.034	16.33
24.34	37.109	35.236	34.802	33.132	32.097	34.131	32.098	32.445	28.198	42.579	36.82	33.667	42.713
34.426	39.319	42.799	34.688	39.275	36.477	39.062	36.778	39.71	47.767	36.127	64.363	31.215	25.135
25.594	44.735	51.131	47.529	43.744	54.276	36.82	43.057	24.844	34.748	57.833	58.282	36.43	31.988
35.233	42.07	43.369	34.818	41.426	41.308	28.105	34.77	24.046	33.901	50.464	48.591	36.43	43.283
13.944	23.847	22.591	23.724	22.105	22.206	17.135	20.319	17.207	21.951	23.908	27.043	26.828	26.892
14.033	26.571	31.043	22.441	27.869	37.108	24.323	23.25	29.177	39.149	19.042	18.521	21.978	23.004
27.413	69.246	91.159	70.916	76.758	45.676	66.346	70.107	64.362	73.721	84.539	83.341	58.798	33.92
32.776	33.366	34.076	22.736	32.648	25.181	24.92	23.52	21.493	67.045	42.82	38.73	34.751	30.428
32.776	38.113	43.149	27.089	40.59	33.825	28.468	33.432	25.721	39.464	50.65	44.018	39.976	37.742
30.039	37.089	38.999	30.566	38.619	37.862	26.934	31.6	26.257	27.242	36.828	41.375	46.911	24.445
57.343	37.089	39.404	39.362	38.619	36.712	26.934	39.972	33.785	30.972	38.876	48.571	53.982	38.172
27.444	34.647	38.922	38.213	36.05	27.233	26.913	34.511	28.594	28.689	33.755	29.588	33.919	33.844
17.661	28.408	27.047	24.316	27.898	32.734	27.497	33.07	21.445	25.398	36.782	49.143	26.193	31.007
18.615	28.408	25.692	24.316	24.057	28.787	27.091	23.742	21.445	38.268	47.585	41.816	27.495	31.007
18.204	36.121	32.079	35.656	32.418	30.715	21.353	33.059	19.569	40.612	50.989	51.014	41.617	29.406
36.949	45.588	45.191	37.161	43.876	36.506	29.485	41.209	26.33	56.245	59.082	67.886	52.796	46.032
64.058	59.85	59.115	45.815	57.631	55.863	36.013	49.689	36.017	69.828	82.583	75.705	64.275	54.692
69.461	57.347	58.4	50.371	56.116	60.842	38.022	46.107	41.558	58.405	58.941	67.448	64.275	49.421
133	40.875	39.78	33.392	38.564	30.358	30.646	31.234	26.692	43.165	56.063	55.456	38.867	37.026
33.856	31.752	29.579	25.938	28.47	22.891	25.769	24.01	22.165	33.065	30.274	43.045	34.218	36.591
40.568	67.965	65.18	57.52	65.975	55.311	46.049	55.314	45.549	69.665	74.361	72.583	75.024	63.537
48.376	43.558	42.377	42.252	44.531	31.665	30.751	42.147	28.351	38.36	51.548	72.583	37.406	31.493
48.376	42.161	44.311	35.063	42.763	33.578	30.459	34.509	22.614	45.534	55.141	43.419	47.893	43.415
26.55	57.131	61.327	57.898	57.61	64.63	39.121	47.365	37.65	58.865	61.042	57.608	57.78	54.189
89.334	51.481	58.065	50.626	53.187	42.067	36.872	47.365	35.497	48.775	59.181	45.901	49.472	38.763
31.414	29.626	25.609	24.336	25.587	29.184	21.487	21.424	20.088	36.826	39.77	37.838	31.616	34.425
30.117	18.355	18.553	16.489	19.144	23.175	17.902	14.58	13.961	19.399	19.255	21.742	16.516	19.913
81.276	52.078	56.038	46.583	54.542	48.42	37.191	39.861	27.727	44.981	66.57	52.1	63.003	39.745
140.13	96.092	99.309	91.188	100.13	82.997	73.711	83.576	72.418	84.509	84.995	79.353	80.557	75.849
62.339	70.634	84.285	65.764	83.061	67.082	50.139	61.754	47.516	60.762	70.041	76.411	71.157	58.605
43.758	44.309	49.673	57.746	48.53	41.642	28.202	36.236	35.742	43.891	43.321	47.29	48.935	35.665
36.531	44.309	49.673	49.039	48.53	41.642	28.202	35.31	35.742	51.855	31.014	47.29	58.949	35.665
35.866	19.793	18.25	16.117	18.138	21.223	14.632	15.757	17.592	42.786	24.813	23.95	21.718	18.861
40.061	43.107	43.645	41.593	42.255	41.408	31.747	34.775	26.891	51.938	48.864	57.099	46.671	37.382
26.809	43.107	43.645	41.164	42.255	36	29.561	34.775	22.93	55.464	48.864	57.099	46.671	37.382
37.969	36.697	34.776	37.501	34.263	36.562	29.236	30.623	24.961	38.11	46.942	47.894	37.628	38.175
35.279	54.439	57.801	50.064	56.708	52.776	41.613	42.865	37.833	56.022	49.488	59.528	56.625	53.88
27.443	53.082	52.83	50.064	49.821	47.598	36.872	40.193	33.777	45.598	49.815	57.504	54.824	53.88
30.647	42.691	49.341	41.611	50.036	41.705	27.168	39.069	24.954	43.822	66.383	44.495	47.354	35.742
26.126	46.07	49.192	45.172	47.75	39.192	30.047	39.719	27.619	46.211	59.152	45.268	47.436	29.389
17.16	30.019	26.602	28.849	27.066	31.549	20.698	24.986	20.287	27.152	36.388	28.898	26.939	23.272
23.841	28.305	28.517	27.512	27.099	32.196	20.698	22.056	20.287	33.015	34.05	29.98	38.326	25.287
16.453	36.259	36.472	32.902	36.944	32.46	23.325	30.398	20.512	40.49	44.837	45.646	46.416	28.6
26.232	41.466	45.935	41.609	44.158	34.503	25.685	33.916	24.274	39.964	44.837	45.906	46.416	37.003
35.189	43.96	48.253	45.549	47.734	44.494	25.685	33.916	25.606	38.422	43.266	37.462	49.409	30.262
29.164	34.818	37.651	43.131	37.428	31.689	23.076	31.388	18.493	40.312	46.795	35.434	41.37	29.247
33.004	46.542	50.768	43.795	52.183	46.224	29.115	43.568	25.858	46.401	57	40.677	47.18	31.65
23.61	38.632	40.252	34.864	37.494	28.967	25.991	34.439	23.043	36.272	53.919	40.534	40.591	35.997
45.981	45.989	45.627	49.24	44.456	39.904	32.256	37.481	28.32	51.428	56.164	48.637	49.855	36.217
42.252	28.197	33.209	33.063	29.727	27.568	18.516	23.472	19.546	25.464	29.492	34.111	27.48	23.297
27.611	41.565	41.716	38.189	42.619	34.077	28.525	34.758	26.834	41.556	43.261	42.155	42.804	31.175
44.173	21.137	20.229	16.986	19.121	23.818	20.163	17.822	16.083	25.412	28.187	20.305	23.916	18.878
46.997	77.178	77.869	65.253	71.223	63.346	64.17	57.583	44.904	93.92	91.82	81.407	87.279	68.812
33.985	53.637	53.315	45.701	51.828	45.589	36.662	46.728	31.063	55.901	63.298	63.507	60.461	46.65
34.604	58.601	54.737	52.738	53.989	53.016	46.916	49.662	35.144	70.933	74.524	63.619	63.496	46.506
34.834	57.452	59.247	52.81	59.598	61.812	50.352	48.876	41.256	52.343	66.115	51.778	65.064	44.305
27.01	60.966	70.581	60.876	61.661	60.994	51.478	54.142	47.772	51.102	66.115	74.115	57.908	61.754
31.89	54.532	53.307	51.227	51.016	55.938	44.6	48.795	38.078	46.923	59.524	53.584	57.59	40.44
33.86	42.85	38.557	37.293	39.635	33.871	28.592	37.999	34.874	48.506	54.553	52.033	46.96	43.946
35.654	45.498	47.348	41.066	44.958	40.195	33.331	40.876	29.071	45.442	59.692	55.377	49.732	46.59
49.235	43.797	47.986	41.066	44.888	40.195	27.313	39.912	24.87	43.025	45.943	46.084	48.441	40.196
35.77	53.961	57.403	50.303	55.956	47.973	40.142	49.258	32.712	60.611	65.332	52.827	62.774	46.07
23.391	61.556	57.403	51.895	56.071	47.973	44.768	52.191	36.754	55.661	57.587	61.729	64.525	57.013
36.409	34.75	31.388	34.148	30.179	31.683	21.815	29.181	23.594	34.394	32.846	39.902	40.109	26.733
45.67	34.75	41.085	36.018	37.453	29.18	23.523	31.853	22.498	34.394	34.17	55.533	40.109	29.949
33.768	49.977	44.948	42.621	45.579	48.856	34.803	43.102	29.371	45.78	52.317	46.06	54.401	34.923
33.768	58.202	57.432	47.149	59.106	46.828	40.38	50.664	35.611	68.982	64.418	72.614	62.005	46.953
69.268	60.428	66.604	48.632	59.832	60.603	54.327	50.664	46.119	58.566	62.956	71.412	64.566	54.356
27.692	33.532	35.957	26.821	31.763	30.58	28.981	26.117	24.283	39.158	49.395	51.774	33.228	27.72
31.425	49.637	59.459	36.395	54.854	46.046	38.571	41.192	31.509	40.271	49.2	56.578	53.187	44.137
29.844	44.657	51.247	44.274	48.26	46.067	28.608	39.791	27.604	40.271	47.269	44.003	43.074	36.205
14.357	44.772	48.216	37.611	44.426	37.77	28.608	38.609	27.051	39.787	43.774	44.956	48.719	39.498
36.089	44.772	48.216	37.697	46.683	42.006	31.313	40.421	27.478	39.787	40.407	31.988	35.339	39.498
39.346	32.991	37.662	28.505	36.935	28.033	32.657	24.969	22.733	40.137	30.96	26.314	33.587	28.744
28.491	46.095	42.201	34.464	45.98	38.26	35.138	40.166	35.083	47.98	73.258	53.42	42.016	48.819
42.413	51.019	45.349	55.863	43.243	47.254	45.141	40.669	34.014	42.748	58.277	56.314	55.252	37.313
43.352	50.51	45.349	48.692	44.343	48.516	40.016	40.082	32.502	45.938	58.277	53.502	47.079	52.826
37.07	50.51	49.858	45.575	46.987	46.766	37.519	40.082	32.502	45.938	52.798	53.502	42.871	38.915
57.159	41.257	39.563	39.532	39.644	44.334	39.383	34.224	29.924	48.17	52.878	45.254	42.481	34.133
33.107	40.703	37.589	36.304	38.292	30.888	39.548	33.492	29.434	45.904	59.252	50.101	45.636	40.752
28.881	48.975	47.93	37.668	44.761	39.062	32.181	42.356	28.947	52.514	60.571	54.799	63.629	40.192
28.668	63.444	54.246	57.029	55.544	59.594	46.823	51.193	47.416	61.623	73.623	73.057	67.297	67.715
23.434	42.681	39.444	33.521	39.052	36.122	30.844	35.043	29.46	45.328	57.987	49.336	46.597	42.726
22.327	31.25	30.341	25.753	28.008	30.817	22.266	26.209	20.434	29.809	37.515	36.106	27.29	28.762
26.134	34.393	35.428	31.971	33.55	35.402	29.195	28.855	21.934	39.542	44.806	31.608	40.553	28.675
35.818	34.393	35.428	31.971	33.638	32.171	25.584	28.059	19.915	40.535	49.177	31.582	37.502	30.135
29.878	41.846	42.396	38.648	40.765	39.323	28.482	34.162	27.505	44.454	54.291	52.958	43.345	38.197
54.131	51.958	51.506	49.984	51.104	45.232	36.139	45.714	33.637	59.627	60.254	53.09	54.124	48.195
46.821	68.618	75.797	72.187	70.89	81.637	59.287	53.326	47.402	62.124	54.398	62.815	60.536	57.313
45.902	49.816	47.864	46.109	49.309	53.962	37.335	38.566	39.602	58.914	51.978	47.084	47.292	42.334
52.051	60.742	68.646	71.497	68.389	77.402	54.084	62.219	50.82	61.992	60.856	60.1	58.976	53.601
52.051	60.742	65.296	56.585	66.246	59.654	54.084	62.219	44.392	48.758	50.587	60.1	58.976	53.601
43.189	71.157	73.717	69.304	74.176	79.378	58.696	64.919	50.4	63.874	50.587	72.81	74.337	53.772
41.438	56.85	53.817	44.892	49.828	38.593	49.1	43.845	38.49	61.224	64.428	64.285	51.279	49.665
36.841	34.942	29.097	30.626	29.031	30.627	26.607	29.398	23.527	43.524	45.063	37.503	37.29	31.305
62.768	55.169	53.97	40.888	50.671	48.465	37.061	43.133	32.713	61.729	71.134	60.607	59.02	48.976
47.931	35.111	32.324	29.428	30.682	25.643	22.449	29.032	22.076	39.645	45.785	42.91	43.074	30.448
59.484	31.71	30.504	26.659	28.955	24.858	25.247	24.669	22.26	33.395	45.288	40.284	29.432	26.084
56.493	45.497	41.992	43.614	44.656	51.368	37.972	33.223	34.754	44.02	44.717	51.909	45.011	41.11
53.496	62.796	71.862	52.188	71.571	55.561	54.016	53.4	42.803	67.737	49.023	55.995	53.93	53.91
24.086	46.298	49.979	39.28	57.633	51.431	33.854	38.477	33.461	67.022	56.63	51.666	59.964	53.762
36.94	25.545	24.534	22.359	23.95	23.047	23.633	23.83	25.929	28.721	28.171	34.103	29.091	25.045
33.065	55.178	58.222	46.646	56.738	48.858	42.894	45.792	43.105	60.131	54.009	58.112	53.097	44.039
20.976	28.437	26.742	22.422	28.096	32.167	23.541	20.027	19.274	29.588	37.468	34.702	32.759	30.294
75.54	64.234	62.418	52.523	63.202	52.283	49.346	52.69	41.529	69.26	89.826	78.372	68.303	59.389
50.933	49.217	44.579	37.477	44.643	41.501	38.161	39.896	33.228	50.57	68.415	62.721	46.994	45.678
87.973	57.612	74.659	42.958	69.868	47.353	38.161	48.946	33.228	59.175	72.6	62.91	63.23	54.574
45.502	61.084	65.127	56.395	59.064	60.865	54.248	52.818	52.892	60.751	62.694	69.032	55.788	53.858
60.536	62.512	70.569	53.827	66.722	63.805	41.693	51.737	37.335	64.875	72.31	71.266	70.301	48.9
48.532	71.82	71.201	56.239	69.312	56.792	46.038	58.847	45.076	71.031	67.912	73.721	69.491	62.617
43.843	33.907	32.089	25.989	31.277	28.906	25.396	27.351	28.686	39.583	39.283	40.172	32.947	29.372
43.843	44.206	40.254	33.664	38.622	31.273	31.943	33.38	30.997	54.59	61.739	58.221	48.367	42.891
47.629	47.638	43.428	37.507	41.664	35.801	32.739	35.368	30.217	53.715	68.68	56.74	47.918	42.891
66.25	52.789	52.289	44.047	52.782	46.121	39.571	45.678	36.288	55.184	64.376	61.375	55.011	53.008
66.262	90.807	83.123	84.118	82.702	95	75.038	84.825	77.528	76.596	84.771	80.216	80.346	62.981
68.791	48.558	50.684	42.611	48.642	43.584	36.812	41.046	32.454	49.884	57.514	54.041	50.242	35.708
67.768	84.056	71.773	69.59	71.281	65.923	80.34	68.957	72.137	95.228	113.24	110.27	81.176	83.4
85.67	100.97	94.222	101.25	96.09	102.64	100.66	96.202	94.633	112.12	97.725	106.11	81.176	84.507
59.583	58.3	56.309	71.298	58.751	65.034	69.423	67.493	67.708	59.3	69.164	65.904	52.226	52.311
67.915	77.821	81.446	63.288	82.893	66.392	65.147	65.71	62.271	80.953	95.804	87.72	58.411	80.121
47.375	47.311	46.186	35.791	44.515	36.953	37.457	36.94	33.938	50.003	60.307	61.464	48.453	46.217
68.216	55.579	56.237	42.884	54.337	46.674	38.142	49.628	35.301	70.547	77.68	62.388	61.112	53.45
64.816	172.51	150.04	200.43	164.16	201.56	186.53	180.05	168.25	167.65	135.2	131.84	120.36	122.12
112.79	63.926	59.611	52.349	59.247	63.986	48.15	55.533	49.64	70.108	89.31	88.075	56.25	60.253
97.593	83.093	84.752	72.928	81.376	84.532	85.353	67	81.109	89.156	109.46	114.21	65.394	101.92
46.912	47.787	52.108	45.2	48.991	45.752	39.627	45.397	37.55	41.103	60.45	53.428	43.832	38.05
33.836	21.827	19.446	16.786	19.577	20.51	14.081	17.352	14.219	25.241	31.038	26.335	24.133	22.066
36.731	25.796	24.379	22.646	22.92	20.269	17.306	24.343	16.715	28.698	32.226	34.451	25.56	29.81
55.745	30.924	26.794	25.7	27.012	33.314	20.539	25.598	17.803	34.087	40.841	40.487	33.368	32.717
30.684	34.177	30.621	28.648	30.65	33.314	24.266	29.211	21.228	36.132	43.054	39.685	37.144	32.717
67.123	39.401	36.931	31.142	34.195	35.501	34.758	32.676	26.466	41.895	53.928	49.419	41.153	39.314
66.292	41.006	36.924	34.689	36.498	35.501	30.043	32.234	26.558	43.36	53.366	50.169	40.63	54.332
63.672	42.261	43.595	35.538	41.933	34.126	30.984	37.155	30.706	46.292	60.928	56.633	44.226	41.539
63.672	47.544	38.759	41.608	38.418	42.876	31.143	40.44	35.022	50.623	63.635	62.301	43.113	51.536
60.7	63.632	64.009	45.932	59.35	53.728	44.434	47.312	38.91	69.456	81.177	67.837	71.86	65.264
47.576	31.075	29.969	28.027	28.5	29.46	19.946	26.782	18.44	32.4	43.53	33.458	37.661	36.337
75.482	57.446	51.311	45.518	50.9	50.528	40.961	45.429	34.365	65.421	81.199	68.727	67.023	50.644
53.582	46.063	44.136	36.056	43	40.625	26.729	36.104	25.855	60.421	60.645	56.999	52.359	41.869
62.978	60.915	52.12	48.291	51.038	45.41	45.002	52.513	40.163	68.474	77.778	79.623	60.387	58.129
20.044	60.928	62.179	54.423	61.815	53.407	44.798	51.874	41.313	57.008	56.571	57.773	76.582	50.145
33.771	50	52.555	43.748	52.65	44.822	34.361	39.599	33.44	58.162	56.571	53.197	61.885	48.941
29.329	45.116	42.695	39.634	42.327	35.526	31.593	37.188	32.54	52.567	57.414	57.093	51.225	38.376
57.602	57.107	62.098	47.059	60.985	59.781	40.911	50.253	37.522	67.835	67.491	66.149	65.902	54.162
46.039	58.24	62.654	49.774	56.256	52.117	41.074	53.911	37.522	58.979	54.024	66.138	49.759	54.162
43.573	58.24	62.654	49.774	54.084	50.322	44.641	51.319	39.276	58.979	52.886	66.138	48.364	59.2
37.403	51.091	53.299	43.533	51.215	45.704	32.237	45.869	26.812	50.506	59.866	47.458	60.587	40.882
37.403	76.149	71.376	57.703	66.366	64.43	54.971	57.846	45.984	74.88	73.909	87.846	66.973	62.462
41.665	43.446	46.208	45.543	46.563	48.969	29.475	41.206	32.759	35.53	42.749	40.849	39.375	37.345
30.965	33.802	35.552	31.965	34.06	31.51	29.475	32.753	32.759	36.881	37.861	37.415	39.375	37.254
22.985	19.242	19.976	16.658	20.522	26.117	16.612	16.692	11.82	24.681	26.967	22.765	23.2	19.879
34.426	39.332	39.036	38.314	39.957	47.601	27.065	30.916	28.055	37.933	39.604	43.444	41.445	37.78
26.067	38.595	39.808	32.215	40.188	32.617	20.779	32.301	19.77	44.338	52.377	41.637	46.972	34.722
33.923	38.595	39.808	32.215	40.188	41.886	22.213	32.301	19.77	44.338	52.377	41.637	46.972	34.722
29.733	34.023	33.004	31.249	34.137	39.219	19.88	25.088	22.876	39.983	43.425	36.886	30.268	25.743
71.963	34.023	33.644	39.338	35.336	44.135	21.079	29.254	25.666	40.931	63.226	41.079	30.268	25.743
23.807	20.239	17.11	15.511	18.943	20.502	14.411	14.906	12.862	24.598	26.041	23.589	22.47	25.591
23.148	22.543	22.932	20.041	20.367	20.958	17.312	20.964	13.681	24.732	28.097	26.042	28.082	19.788
35.337	22.543	26.835	19.275	23.473	20.958	17.312	20.966	13.681	24.732	35.61	26.042	24.234	20.177
39.232	43.098	42.175	33.038	39.254	43.473	29.622	45.275	28.696	48.84	51.193	59.802	46.074	36.792
43.778	37.195	36.837	29.83	34.779	34.464	27.418	29.906	21.909	41.754	48.57	44.952	40.137	34.27
43.778	33.436	36.837	29.153	34.779	36.346	23.067	29.906	22.63	36.88	46.251	40.355	38.193	38.392
47.046	65.816	72.145	57.714	67.099	59.764	45.063	49.072	45.101	56.007	72.578	64.597	67.018	49.405
44.931	47.003	53.364	41.806	54.909	51.179	32.439	41.523	27.753	52.205	54.634	58.149	57.697	35.151
35.243	38.979	40.683	36.191	39.607	37.165	26.512	35.243	24.511	38.669	50.798	44.342	42.243	32.632
27.431	39.014	40.683	34.673	39.607	35.742	28.495	36.264	24.511	39.432	47.645	41.698	41.291	37.67
42.478	42.959	41.37	37.839	40.971	40.17	32.413	33.3	30.267	41.65	58.743	46.078	44.815	40.599
33.923	30.876	29.559	29.786	29.485	24.629	20.82	24.004	14.681	31.673	36.351	31.798	37.757	27.727
40.082	36.147	34.332	38.761	35.076	34.715	23.77	27.802	20.403	36.103	47.021	42.608	35.92	31.825
41.866	27.571	35.62	37.276	33.908	30.964	26.296	30.86	21.109	24.545	34.058	27.064	27.144	37.924
37.053	35.304	37.386	36.933	36.225	36.994	28.261	30.673	27.053	36.596	39.237	33.198	36.563	35.319
31.378	32.313	34.523	45.245	36.225	30.182	23.132	34.429	22.544	28.15	24.396	30.701	24.118	20.985
27.229	26.121	26.053	34.994	24.239	22.244	18.556	21.18	15.645	27.871	31.199	28.497	35.397	28.909
35.889	26.721	26.493	23.02	27.683	27.078	20.83	22.032	20.871	30.514	34.891	32.506	32.78	25.272
66.175	38.867	31.983	30.413	31.067	32.796	30.19	28.219	28.256	41.458	54.347	51.484	37.366	43.389
57.924	34.677	32.066	35.379	31.675	45.199	27.957	35.769	24.559	29.848	37.905	31.066	36.711	32.476
57.924	22.729	21.206	19.107	20.651	19.095	16.733	20.378	14.913	23.879	29.185	28.899	22.461	26.485
63.444	23.998	22.786	19.107	22.196	18.75	23.101	19.807	20.647	26.268	31.424	28.899	21.832	25.441
62.416	28.98	23.231	24.151	24.101	21.403	26.82	21.248	23.315	28.615	40.378	40.959	23.982	37.277
27.526	18.398	17.018	14.427	15.305	18.652	16.874	13.198	15.019	23.498	25.586	27.369	18.683	23.798
24.24	28.769	25.161	23.705	25.677	24.634	19.789	22.986	20.521	30.731	37.924	34.137	28.462	35.648
39.339	34.554	29.38	27.544	31.064	32.282	26.439	25.327	25.29	38.536	46.722	46.132	34.263	34.778
39.339	25.245	22.546	19.634	22.601	22.256	19.401	21.588	15.666	25.359	35.183	37.31	25.473	31.242
31.895	29.379	29.936	24.388	29.333	28.439	20.234	24.451	17.915	31.161	40.885	44.981	31.154	26.5
52.494	42.793	36.569	34.624	35.608	33.262	30.535	34.746	29.182	52.832	64.503	64.219	45.814	48.354
35.917	42.607	35.784	33.215	35.27	37.32	30.535	31.351	27.46	48.674	58.869	52.926	42.257	51.95
53.768	64.917	53.419	51.451	55.872	51.975	50.715	50.49	45.89	61.692	82.119	80.344	56.627	64.494
31.333	25.936	28.417	21.23	27.342	29.104	19.753	24.381	18.567	33.797	36.142	34.104	26.147	31.465
65.029	48.396	41.027	36.929	41.144	41.227	38.326	35.9	35.219	52.097	67.241	69.872	50.765	55.765
88.711	48.396	41.027	36.929	40.571	41.227	38.326	35.9	35.219	52.097	67.241	69.872	40.502	55.765
42.837	34.519	28.555	28.135	29.754	27.306	26.064	27.458	24.011	34.118	42.485	42.096	32.786	34.028
32.269	31.465	31.643	24.814	31.227	25.026	19.422	27.287	21.512	34.118	41.123	35.217	36.44	28.398
40.606	44.542	43.939	40.017	42.682	39.537	29.017	36.225	26.284	47.912	55.383	58.842	43.284	44.511
25.301	23.164	22.062	17.082	19.929	17.041	16.006	19.711	15.545	26.046	37.5	29.053	24.658	26.818
39.535	50.022	41.719	38.509	41.447	39.741	31.809	38.589	30.74	58.152	64.294	63.592	58.211	55.275
48.667	50.022	48.206	42.173	48.918	41.509	38.276	42.381	30.74	55.453	62.518	61.054	49.88	54.03
66.173	51.732	48.206	41.467	48.975	41.509	36.863	42.381	38.012	55.453	64.302	68.462	49.88	51.211
61.793	51.764	42.648	41.467	42.952	42.813	33.319	40.945	31.15	54.027	74.345	68.91	46.032	51.211
66.901	43.496	38.02	35.625	39.29	37.157	34.355	33.703	29.238	44.372	53.995	51.046	46.06	42.533
65.03	32.771	30.35	27.376	31.017	32.692	24.69	25.033	22.418	32.553	43.311	38.666	31.568	35.257
37.483	39.805	40.32	36.084	37.464	43.563	24.768	31.875	25.93	42.326	57.176	45.051	42.609	40.846
47.943	34.553	36.851	28.743	33.164	29.975	25.14	34.032	22.098	63.673	45.497	44.545	43.746	49.327
41.388	36.353	36.851	32.879	33.164	33.218	31.809	34.032	27.026	49.193	42.829	44.545	37.163	49.327
67.506	34.544	41.587	26.453	40.364	28.538	21.359	29.494	17.745	40.964	51.801	40.537	41.332	30.825
46.764	26.712	28.493	25.827	26.479	28.137	25.298	26.099	22.422	28.473	38.096	33.484	30.356	26.441
46.362	38.428	41.878	34.863	38.264	37.368	35.208	31.893	32.302	38.761	50.577	44.715	46.265	31.113
34.684	32.017	28.348	25.44	28.689	28.119	20.392	25.337	19.017	35.415	42.929	35.714	33.969	29.957
30.107	33.813	38.221	29.316	34.914	28.119	23.859	27.237	23.82	35.663	36.509	32.676	44.257	29.761
34.181	38.356	37.064	30.378	36.57	30.02	27.849	30.892	23.82	47.977	43.32	42.028	44.257	41.033
51.058	36.417	36.364	32.329	34.192	31.824	31.024	31.426	28.44	55.303	43.844	39.479	40.967	41.033
26.803	35.383	42.342	38.375	35.92	33.566	22.269	31.464	21.47	38.419	39.241	37.516	38.005	28.643
37.229	34.877	39.408	31.827	33.496	33.175	35.934	30.218	21.47	44.676	44.956	41.615	38.797	41.414
42.301	46.979	46.674	40.47	44.16	36.459	35.767	41.179	31.329	49.347	59.226	53.571	53.717	40.026
38.026	26.604	30.55	21.557	29.654	22.795	15.666	23.508	16.432	30.019	31.672	29.119	30.725	31.444
25.827	34.709	35.368	28.286	34.118	30.171	22.625	27.206	21.721	42.668	48.59	41.067	40.563	35.051
34.266	29.38	31.88	29.226	30.678	45.201	21.247	24.878	18.697	29.662	43.667	34.933	34.619	33.263
35.983	48.479	50.835	36.558	47.637	42.319	41.987	28.438	38.987	48.626	53.524	63.525	59.432	49.062
44.419	62.099	66.363	46.559	61.85	66.211	39.78	44.14	42.768	60.676	67.506	69.73	52.557	63.236
24.757	33.321	35.083	38.278	37.2	29.252	27.238	28.538	22.404	29.435	35.808	35.645	57.117	30.549
35.612	39.342	40.852	28.904	36.864	29.252	30.398	31.861	27.45	42.827	41.164	47.674	42.666	39.001
25.31	19.674	20.141	15.122	18.059	17.138	14.331	14.596	15.789	23.79	29.474	30.088	19.999	31.237
34.417	20.477	17.68	17.245	16.463	16.492	14.331	14.719	15.789	22.283	29.474	30.088	19.865	31.237
38.516	21.333	25.102	17.245	21.89	18.247	15.323	18.003	14.191	25.839	40.444	26.715	24.39	19.944
32.063	29.908	29.023	25.062	28.913	30.202	24.248	27.266	17.875	30.017	38.658	83.874	30.278	26.51
32.076	50.543	53.208	54.179	52.494	58.117	35.213	41.376	42.443	43.203	58.376	44.208	50.855	38.651
25.132	62.243	78.833	58.186	76.78	84.316	47.517	54.906	48.684	41.788	25.673	43.702	57.761	51.817
21.805	27.925	32.279	22.013	30.268	27.568	26.065	25.771	23.153	23.564	22.631	29.536	29.532	25.97
28.857	39.198	43.946	38.971	43.568	52.17	26.75	32.64	24.265	39.126	37.878	39.323	46.747	29.158
31.227	31.42	36.932	24.78	37.057	37.602	19.917	27.552	19.818	29.344	32.857	32.749	34.36	23.919
41.417	33.437	32.24	26.585	32.776	30.148	23.317	28.272	21.173	38.093	48.562	57.649	38.395	32.868
33.607	32.672	32.24	25.886	31.16	30.021	21.826	24.577	21.173	37.063	48.562	46.703	43.502	32.868
60.182	64.439	59.866	50.214	59.179	53.12	46.582	55.185	44.585	70.167	88.076	81.311	63.791	57.992
47.841	56.447	47.946	46.542	48.924	50.296	44.685	47.055	39.515	54.117	68.552	67.784	53.615	54.167
100.03	72.113	60.23	61.739	61.042	59.359	61.074	58.35	55.628	69.878	89.421	86.202	63.498	78.565
54.385	54.05	39.757	55.832	41.544	56.121	61.793	48.843	65.297	62.707	55.369	50.465	65.267	48.532
65.116	47.513	46.937	35.583	47.374	41.111	30.535	38.217	28.955	63.168	63.881	53.392	64.272	44.515
68.184	77.777	75.081	69.793	73.625	83.699	67.532	65.44	59.262	108.65	99.349	80.82	85.323	64.773
65.406	70.619	79.915	67.722	73.563	73.243	49.403	64.918	43.727	100.96	86.518	87.925	84.243	80.748
62.011	61.056	51.685	43.45	51.429	42.002	37.313	44.597	35.58	72.807	86.518	79.85	57.073	61.962
53.055	53.881	45.802	42.958	47.619	47.666	36.243	42.427	33.629	60.731	76.822	66.063	56.536	45.952
53.055	42.472	37.068	34.422	36.847	40.388	31.066	31.471	33.253	41.904	50.12	53.702	42.351	46.724
160.17	58.853	61.931	51.426	58.872	64.316	47.651	51.251	53.466	92.824	82.44	76.412	78.593	78.6
106.63	81.837	74.368	70.792	68.376	67.43	73.762	63.337	69.387	118.42	119.66	115.97	89.615	86.4
108	58.938	50.18	55.415	52.341	59.067	47.76	52.33	42.094	70.969	85.478	75.683	63.003	59.761
37.795	50.292	44.986	42.901	45.385	39.085	39.11	43.572	38.84	52.178	62.982	60.375	50.094	42.918
42.408	43.987	44.896	35.89	43.101	38.454	29.368	37.108	25.676	52.178	56.463	54.209	48.13	43.883
33.901	33.657	30.886	28.318	30.528	33.21	20.562	28.792	21.658	46.772	39.189	41.771	38.058	30.77
32.796	27.045	28.709	23.303	27.564	30.465	20.562	23.661	23.264	34.481	33.306	31.529	29.718	24.979
39.821	29.85	29.549	26.08	27.675	25.381	21.328	23.481	19.844	30.641	35.547	37.842	32.362	27.544
45.662	45.523	45.679	33.594	40.804	31.674	29.503	36.564	22.448	63.118	65.243	52.169	55.972	37.102
54.371	59.452	50.941	51.323	51.506	56.049	51.89	44.825	47.08	51.876	71.226	79.856	51.005	49.562
40.058	53.195	55.156	48.979	56.469	47.133	51.365	52.605	55.446	42.242	51.306	57.393	43.77	56.158
43.725	48.802	59.297	42.913	53.031	45.775	44.787	43.74	38.225	48.514	58.176	52.61	54.703	38.781
33.528	44.797	45.911	36.507	46.479	40.741	34.341	42.679	37.219	45.625	58.176	51.291	47.852	38.781
27.061	33.019	31.307	25.02	31.005	26.79	20.694	26.699	19.836	36.441	46.451	41.717	34.258	28.272
28.027	41.925	43.916	33.752	42.208	31.904	25.936	37.812	22.217	46.724	53.849	48.496	48.212	41.723
22.874	41.925	43.916	33.752	42.208	31.904	25.936	37.812	22.217	46.724	53.849	48.496	48.212	41.723
39.599	50.613	47.965	37.893	45.338	41.732	33.759	39.927	34.526	58.725	66.915	62.453	59.938	45.076
130.5	52.279	47.819	47.11	46.053	47.54	57.339	46.574	55.03	66.978	76.691	69.482	69.696	57.772
84.462	100.89	99.904	94.051	97.217	90.102	85.849	88.551	80.732	102.43	108.67	101	93.826	93.245
60.553	66.825	69.922	57.726	68.542	58.528	42.803	59.549	42.06	72.432	87.52	74.082	72.228	57.882
55.535	55.647	58.057	45.958	56.292	45.875	34.734	49.033	32.322	58.698	69.601	60.569	63.877	47.272
29.413	39	37.523	31.931	36.207	42.12	25.894	31.684	24.106	40.62	51.509	45.336	44.146	35.564
30.882	42.877	45.667	35.376	42.749	31.733	28.701	34.636	23.202	49.147	54.176	51.906	47.077	35.216
54.345	32.84	36.675	28.161	36.412	39.402	22.31	27.701	22.072	30.728	39.15	38.719	32.689	27.401
25.961	28.93	34.34	23.553	31.344	23.793	16.443	25.895	16.644	30.961	36.01	32.504	36.768	24.422
32.1	35.477	38.021	29.115	38.533	31.688	19.424	32.329	19.794	39.277	39.571	40.95	42.983	45.325
29.467	42.424	50.424	36.073	47.024	35.717	23.1	39.535	21.144	31.524	37.926	42.544	39.134	25.288
28.213	34.215	36.443	29.642	36.592	29.698	22.841	28.638	21.144	30.232	33.188	31.803	32.943	20.835
28.213	41.077	38.367	33.752	37.239	35.595	27.715	31.817	24.066	41.991	56.268	51.199	44.961	40.14
13.971	20.808	24.851	19.93	24.292	26.604	14.887	21.357	13.145	21.216	26.999	17.877	24.515	13.983
21.42	22.681	26.332	24.774	25.426	26.604	14.887	23.917	15.478	21.382	30.576	21.983	27.022	19.175
12.918	22.681	25.364	24.774	25.163	19.339	13.463	19.908	15.478	20.597	30.576	21.983	23.997	19.175
27.142	18.317	19.919	18.203	20.045	20.74	14.734	17.294	11.342	19.771	24.606	23.199	25.362	18.562
17.699	26.219	21.547	22.36	20.532	20.485	27.002	20.549	21.151	41.611	45.881	26.338	27.509	30.865
23.19	16.39	16.765	13.371	16.328	12.305	14.146	16.157	12.618	18.527	22.731	19.156	16.753	17.464
17.604	16.891	17.251	15.241	17.85	15.384	13.279	17.027	9.7368	20.701	22.731	20.7	21.729	15.015
22.682	37.297	42.78	34.637	36.485	35.955	34.45	30.196	22.436	34.473	41.114	38.63	37.38	26.569
28.136	23.863	21.921	21.363	21.838	28.318	15.672	17.98	17.46	23.505	28.877	27.215	22.465	26.292
18.449	15.726	11.023	11.628	11.31	11.967	10.597	11.733	11.021	18.304	23.356	21.707	14.201	17.543
26.723	17.636	16.881	15.478	15.799	15.875	13.931	11.798	13.315	18.143	23.537	28.252	17.26	15.205
26.723	12.157	13.246	10.079	13.136	14.428	10.131	10.2	9.6879	15.292	17.631	15.065	14.484	14.028
32.019	15.688	17.59	12.174	15.947	14.428	11.237	15.323	12.864	19.464	18.132	18.575	19.372	15.415
31.065	13.049	14.294	12.179	14.017	11.351	13.117	11.478	12.714	14.227	20.064	18.354	13.508	15.702
45.357	26.573	23.881	17.921	24.883	26.674	17.808	21.957	18.505	26.77	39.107	39.581	26.167	25.527
18.555	15.856	15.228	15.787	14.844	21.578	13.835	13.58	11.222	15.383	23.113	18.122	15.066	17.86
27.371	14.976	16.486	13.336	15.829	18.999	9.4483	12.953	9.7718	16.356	19	17.344	11.367	15.056
26.018	15.283	19.993	13.336	19.399	19.388	13.283	12.953	11.974	20.179	19.049	17.654	18.015	17.192
34.645	16.97	17.618	17.011	16.726	17.766	19.76	14.718	13.707	20.064	21.965	21.805	21.731	27.467
49.893	27.272	24.955	20.334	24.186	21.389	29.134	20.558	21.426	28.754	40.344	37.389	23.573	33.478
39.843	16.964	15.111	15.103	15.257	17.225	20.214	13.354	15.79	15.422	22.464	27.341	13.705	23.691
40.437	25.257	23.089	19.555	21.374	21.187	20.525	17.326	16.738	23.976	32.169	29.816	25.33	23.691
33.343	21.132	23.089	17.714	21.374	24.887	17.886	16.19	16.36	23.466	32.169	29.816	24.185	22.88
34.289	34.06	30.307	30.983	29.045	35.482	30.613	26.213	27.434	31.157	41.774	42.063	25.899	40.173
39.881	24.545	21.946	22.311	21.088	21.75	26.427	18.322	18.494	26.689	35.477	35.215	25.338	27.592
30.273	23.644	20.387	25.601	20.953	27.465	26.479	24.285	22.408	24.552	32.179	28.95	20.135	25.789
29.744	21.148	18.108	18.314	18.15	19.48	17.177	15.128	15.193	20.965	23.916	28.736	16.985	23.854
43.232	33.478	33.829	28.552	30.807	24.611	28.405	34.164	27.484	31.198	38.406	60.829	34.516	29.857
29.715	23.052	19.693	23.061	19.863	24.566	21.409	21.66	18.684	19.126	27.829	26.424	17.281	27.575
43.411	24.976	23.827	20.075	23.703	31.999	20.202	17.977	19.342	22.373	31.946	37.131	22.712	29.934
30.945	21.804	21.938	17.607	21.377	17.757	14.395	19.105	12.585	22.546	29.249	23.851	29.427	25.297
33.039	34.003	31.683	28.98	32.74	33.487	23.494	28.795	22.215	33.24	44.627	42.42	34.413	41.654
52.507	26.387	29.632	21.836	29.982	26.755	23.452	23.155	19.279	28.101	34.834	29.698	24.884	17.33
39.484	34.653	37.471	33.34	37.335	36.384	38.713	30.53	33.263	34.28	38.702	40.476	42.03	44.724
41.251	33.507	36.79	26.601	35.095	30.608	24.392	29.756	19.27	37.13	46.397	43.872	38.655	31.844
45.802	36.509	37.905	29.604	35.405	30.987	25.168	29.606	22.636	47.567	46.681	44.355	53.435	34.696
77.05	50.627	50.983	38.04	46.253	37.198	37.538	40.899	37.978	93.397	77.562	60.699	72.63	52.408
98.383	56.283	55.645	45.871	51.274	44.839	44.734	46.551	40.617	87.795	85.171	74.008	78.662	58.578
161.28	76.015	77.641	81.007	71.508	75.02	97.97	74.277	99.853	95.829	103.1	98.901	78.662	86.512
85.98	103.42	106.09	105.91	104.08	106.96	111.69	102.24	114.46	104.99	111.71	116.51	101.04	84.141
95.951	132.66	136.35	161.05	144.61	153.65	135.47	169.89	138.73	120.36	121.59	99.348	124.21	86.537
101.99	117.01	138.47	141.96	129.56	140.78	139.28	129.37	131.35	63.807	70.021	85.733	83.734	102.42
140.41	64.493	95.927	89.499	100.6	102.13	81.04	95.587	87.12	47.779	63.133	64.722	51.35	40.432
138.72	145.26	185.38	167.2	175.39	160.6	115.44	167.78	122.41	106.6	119.69	105.91	99.959	89.399
124.22	57.671	57.804	69.872	56.292	61.248	64.18	65.614	58.48	61.886	71.624	73.114	58.507	53.5
118.8	94.858	101.36	93.503	97.613	99.277	117.32	90.696	113.64	98.028	107.71	112.63	86.652	111.69
124.96	98.863	109.57	114.42	106.43	117.35	114.49	110.51	122.81	66.56	71.982	78.529	71.823	63.785
81.858	118.36	153.63	150.33	150.14	151.9	125.65	165.1	122.81	128.26	114.53	85.553	117.74	75.531
149.39	170.8	165.81	198.11	161.53	204.74	191.39	209.64	187.23	148.41	127.05	126.71	180.77	116.8
175.48	205.53	209.46	217.62	208.59	214.77	217.07	219.86	227.99	148.41	150.3	180.26	180.77	164.58
107.35	131.33	129.12	147.63	137.85	152.19	123.02	166.07	139.62	95.361	98.033	112.54	103.63	146.2
194.95	128.69	133.84	104.56	128.33	105.99	100.62	104.89	98.851	170.45	143.8	129.62	179.22	122.03
134.39	129.83	115.13	118.04	116.16	118.46	116.21	134.31	119.93	131.72	120.92	114.77	118.88	146.34
139.14	129.51	156.73	174.76	159.87	170.05	205.22	188.28	228.04	75.244	93.657	104.68	70.363	139.51
117.95	129.51	156.73	174.76	159.87	170.05	205.22	188.28	228.04	82.978	98.368	101.99	73.134	112.04
91.263	90.22	109.73	92.16	105.88	103.88	101.98	98.468	102.9	79.609	86.094	98.892	73.134	92.394
91.263	90.22	124.74	102.59	116.42	103.88	92.592	108.79	89.809	130.53	115.11	104.21	117.46	84.908
78.211	83.617	66.633	71.941	67.533	76.826	84.829	69.05	89.809	94.331	75.85	90.654	103.57	84.908
90.117	133.06	161.21	140.22	154.86	140.26	127.83	140.35	119.85	127.11	110.94	89.705	164.65	89.9
179.7	135.53	161.21	140.22	154.86	140.26	170.96	140.35	169.03	143.47	131.89	127.82	164.65	116.27
124.76	103.17	116.38	116.22	106.91	112.94	104.47	113.46	107.99	133.8	126.89	121.84	130.23	109.48
169.14	216.69	229.32	234.58	222.8	209.47	206.95	254.88	219.01	176.47	195.63	220.81	235.2	180.11
136.12	129.99	169.14	164.72	159.96	166.24	143.46	164.35	169.54	116.44	101.69	78.343	129.96	77.782
133.51	139.49	177.42	135.27	160.64	137.7	143.46	149.41	140.39	98.612	107.55	132.63	97.725	130.05
189.6	124.33	128.16	135.27	132.1	134	112.08	143.89	102.25	111.39	117.76	102.45	115.81	82.428
105.51	208.57	221.84	206.57	218.1	200.61	161.13	201	141.7	204.98	202.02	161.11	217.55	141.09
149.03	96.195	93.748	95.326	95.268	91.707	117.4	97.816	133.57	75.401	91.732	103.21	74.331	92.721
85.803	127.5	137.86	131.63	141.63	128.53	139.12	135.96	144.86	102.79	125.57	113.23	96.202	107.07
112.91	127.5	140.77	126.19	141.63	126.79	107.06	128.61	98.709	128.53	125.57	113.23	142.2	107.07
145.22	74.447	81.287	92.672	78.078	86.511	93.886	128.06	96.49	67.655	68.91	79.057	74.602	52.836
72.59	43.521	51.858	47.02	51.044	41.539	51.684	71.281	44.164	46.04	53.884	64.377	68.723	42.318
133.86	69.969	53.286	79.659	53.098	71.928	70.723	62.703	66.146	84.864	78.995	79.602	73.52	54.101
242.72	89.668	101.01	99.472	96.503	100.03	88.031	97.234	78.626	108.81	97.854	96.027	105.23	81.418
137.22	132.1	151.82	122.49	139.56	115.84	131.75	114.42	118.9	137.55	115.63	102.56	126.25	88.199
162.12	178.9	191.51	171.39	196.86	175.28	192.87	178.35	190.47	141.55	147.33	160.72	170.01	167.79
195.83	282.41	332.92	301.06	324.07	288.26	282.98	306.2	268.24	253.87	260.67	213.15	282.52	190.72
149.49	116.12	112.3	118.65	108.44	116.57	130.84	115.4	130.02	102.84	106.93	125.79	118.17	105.1
114.37	141.88	138.57	152.57	141.07	147.94	160.29	151.72	143	112.53	121.03	125.79	119.09	138.43
111.6	63.109	53.131	75.151	55.44	73.845	73.471	71.257	71.514	72.739	71.925	64.97	68.495	53.665
111.6	88.071	80.953	82.559	81.523	77.749	120.6	83.052	117.17	100.76	98.139	103.59	75.499	112.42
80.57	115.56	122.85	143.92	127.09	140.05	147.18	132.89	135.25	93.541	93.415	89.145	98.464	79.644
203.63	141.83	164.73	161.24	169.21	154.89	143.2	153.52	151.98	131.73	119.11	120.61	165.14	126.08
137.42	141.83	163.21	143.84	169.64	153.42	129.75	141.94	134.27	132.1	139.87	132.49	124.17	134.41
177.23	96.911	94.714	99.207	95.194	91.75	97.221	108.48	91.858	132.1	113.2	97.168	124.17	105.56
156.24	157.57	168.13	159.62	160.28	148.24	134.02	165.27	136.68	144.87	125.51	141.6	135.42	150.76
165.94	166.37	163.12	178.44	168.59	184.56	151.42	181.91	146.98	161.73	172.35	177.53	181.87	204.6
236.63	209.89	211	221.32	215.04	223.51	238.75	214.88	245.47	161.73	167.82	178.54	188.55	177.86
195.51	191.66	163.85	225.18	169.33	211.1	238.75	194.18	233.1	271.21	239.46	221.4	240.42	213.29
216.69	153.01	152.96	151.88	150.81	146.33	161.93	182.31	160.06	117.91	119.18	127.93	153.8	159.26
111.13	174.67	177.54	195.77	182.22	195.93	197.42	182.62	223.13	75.992	95.684	141.99	89.3	177.35
74.959	109.49	109.87	134.12	107.35	130.83	127.49	121.68	111.19	121.23	142.26	134.59	114.56	104.61
96.153	111.22	101.98	106.12	102.95	101.84	118.4	108.34	122.37	110.63	108.26	98.967	116.2	106.05
126.69	106.97	95.732	103.1	95.038	97.437	110.12	100.39	109.33	91.762	95.774	92.771	81.229	84.765
69.66	107.78	108.85	118.4	103.76	114.63	131.36	100.35	133.92	71.529	106.8	136.71	87.689	84.765
157.55	80.934	103.35	75.968	99.056	81.579	64.681	92.037	70.85	82.569	79.329	81.237	72.523	83.72
157.55	164.6	170.27	167.02	170.91	161.98	172.36	177.53	169.29	183.76	186.39	163	159.86	149.62
110.42	116.9	119.72	135.74	123.3	132.5	147.7	141.11	149.01	72.714	88.093	94.71	76.676	97.138
109.96	53.167	64.143	37.375	54.296	44.438	40.813	42.53	52.267	102.97	78.963	57.311	112.16	58.571
57.077	67.113	44.486	64.546	47.982	58.231	66.958	58.929	62.11	95.384	87.263	81.997	98.032	84.875
46.163	37.387	28.197	27.277	30.746	37.401	21.168	30.333	19.873	58.274	40.423	43.581	61.718	52.147
66.586	57.684	57.352	49.809	53.946	54.353	49.442	49.231	50.7	82.985	78.81	65.273	88.639	55.768
127.62	108.73	87.382	62.36	77.441	63.158	71.342	62.631	74.52	149.23	132.75	143.96	137.28	182.69
139.32	167.41	178.15	165.58	172.38	155.41	164.13	159.09	160.11	152.59	150.51	155.13	153.12	185.91
225.58	147.46	131.65	156.42	135.13	140.11	179.79	143.39	171.43	190.62	173.28	149.88	184.2	142.42
53.588	58.399	58.948	50.032	57.759	50.128	46.825	73.191	64.037	57.267	62.034	56.729	58.602	47.571
41.608	38.805	36.264	28.227	33.001	37.32	32.033	42.722	34.375	47.275	51.425	49.71	49.301	40.81
57.842	38.805	36.264	31.25	33.001	43.881	33.476	40.595	38.826	70.204	53.52	49.71	57.201	62.385
62.238	44.517	38.482	47.7	40.344	48.099	67.767	41.05	70.488	34.813	43.42	45.275	40.043	37.122
314.51	56.805	60.359	70.96	63.825	66.136	101.16	73.948	119.33	77.715	52.521	47.83	78.205	44.024
191.22	47.529	55.99	68.359	51.759	63.923	80.432	62.174	90.573	69.701	52.842	52.103	54.346	42.559
181.14	105.25	130.78	98.553	121.3	120.9	92.51	107.43	79.362	112.51	101.36	82.855	107.69	72.886
116	126.04	155.8	137.48	152.68	149.03	140.91	141.59	126.9	128.15	105.67	121.3	144.4	114.02
203.7	126.04	137.81	129.58	139.58	126.38	114.82	140.08	110.9	120.18	106.89	126.84	125.41	118.97
105.64	66.137	46.469	56.204	44.553	54.458	77.159	53.32	82.154	71.863	70.514	85.026	53.69	96.971
131.26	123.73	140.66	134.03	135.86	137.35	137.84	142.37	143.15	110.02	95.98	104.93	126.35	117.6
165.52	168.61	148.03	192.65	162.36	179.01	189.12	219.09	206.71	145.03	143.82	148.07	154.81	163.91
184.23	178.31	198.3	177.23	188.92	180.46	193.6	183.22	210.19	193.26	183.77	182.34	198.63	176.54
114.55	178.31	179.35	176.38	185.78	180.46	153.83	183.22	160.97	127.83	154.77	182.04	141.03	186.16
147.48	141.47	100.9	138.99	120.24	139.5	149.9	134.94	160.97	103.17	139.1	144.58	85.965	157.1
128.2	104.61	100.38	127.75	103.16	133.07	141.04	120.98	138.11	64.978	64.321	70.21	62.225	74.357
85.46	93.7	82.879	98.925	83.294	93.325	100.46	97.739	97.935	92.253	102.93	96.702	96.057	78.107
142.21	159.81	156.35	177.3	152.82	160.63	145.32	196.95	149.02	151.99	140.12	149.7	153.55	178.99
153.89	159.81	181.94	173.65	167.47	160.63	145.32	169.91	135.31	155.95	150.28	139.88	153.59	136.67
166.35	220.9	228.24	241.83	221.86	233.69	206.51	222.49	203.57	253.47	249.96	224.01	262.44	216.71
160.69	206.85	200.12	206.67	202.88	206.62	206.51	201.22	203.57	215.97	197.27	257.65	219.08	218.28
151.66	108.42	97.687	110.92	93.065	95.553	120.35	102.64	117.32	118.82	95.888	111.41	110.73	159.53
159.23	78.267	84.707	66.923	75.71	68.716	67.742	64.915	71.402	121.96	104.61	89.923	115.12	122.63
127.35	144.35	151.29	153.09	149.96	152.87	142.11	156.9	146.01	121.96	121.37	119	116.06	150.03
127.35	144.35	151.29	160.63	149.96	166.82	165.23	161.14	171.92	110.86	99.045	107.27	109.36	150.03
212.86	254.02	262.13	265.38	268.54	282.28	256.9	281	239.75	217.12	206.46	199.1	238.39	188.68
135.44	118.52	119.01	159.22	119.87	126.78	174.66	154.9	197.41	76.956	79.739	100.42	85.572	85.343
147.86	140.34	140.28	156.59	137.63	129.92	147.39	138.07	153.03	97.916	124.14	139.18	125.59	124.65
95.63	63.886	59.933	69.718	64.473	78.745	75.684	66.434	80.348	66.908	59.276	69.449	60.695	53.316
82.087	94.362	115.17	98.706	105.17	87.181	121.33	105.49	114.78	72.816	71.846	69.863	72.504	76.658
161.97	95.645	115.59	103.23	109.41	100.77	70.168	111.09	60.398	126.23	110.35	101.19	132.87	107.52
161.97	111.86	95.051	139.01	97.679	134.11	169.43	114.91	177.93	165.85	130.37	101.19	180.41	116.21
185.3	219.03	223.82	230.78	214.52	220.23	204.68	229.16	219.36	211.18	206.06	187.11	205.63	206.01
167.19	126.35	120.51	154.44	129.95	143.31	163.43	144.06	184.86	86.279	96.612	120.34	84.732	129.26
172.56	265.68	250.18	247.77	251.26	244.53	237.03	234.79	210.46	178.69	237.75	290.51	186.36	245.7
136.15	167.42	195.68	179.81	184.36	177.22	139.64	188.65	133.88	178.69	174.29	144.86	184.8	154.13
80.448	65.215	56.811	58.455	58.226	55.262	46.702	90.658	74.977	70.078	66.281	69.117	116.02	59.991
122.29	78.379	93.695	75.108	85.28	87.823	90.329	95.85	96.038	122.68	116.18	86.613	104.3	98.352
157.72	95.171	101.85	122.92	110.04	113.79	149.58	117.14	145.58	109.96	94.69	103.24	92.357	73.486
157.72	184.13	159.85	185.39	177.28	188.31	174.37	192.32	163.7	116.6	127.78	140.35	129.59	148.5
106.16	137.53	129.95	140.77	140.87	135.16	161.7	146.44	163.02	112.84	127.34	121.79	92.55	129.18
80.074	95.681	94.604	103.4	99.061	112.02	108.4	95.812	101.66	84.266	77.102	86.456	95.211	71.234
92.821	91.999	89.491	102.54	91.078	105.98	113.61	131.15	125.16	91.369	89.695	86.456	99.122	78.615
153.47	180.02	166.91	173.32	167.21	159.29	181.36	159.4	170.65	179.27	165.7	173.61	156.17	196.39
133.05	239.85	237.2	231.78	243.22	243.09	222.8	231.11	234.44	202.95	201.6	217.55	222.78	262.81
186.02	228.42	191.81	214.69	201.52	217.8	215.68	208.17	221.25	202.95	197.53	211.65	222.78	235.83
152.91	228.42	186.39	221.59	197.41	230.51	230.89	213.83	240.34	229.41	230.72	221.33	237.71	266.92
185.4	114.94	157.58	112.12	147.82	133.11	107.98	124.27	96.383	151.36	117.1	111.34	166.59	120.86
143.94	75.034	44.208	84.844	51.329	77.637	90.436	95.119	87.198	106.38	102.48	88.805	78.924	76.684
143.94	120.99	102.36	114.73	103.12	118.57	123.65	118.34	125.89	106.38	97.103	98.365	88.63	106.6
113.88	67.944	87.938	88.179	81.242	81.971	78.775	78.934	81.583	51.363	58.475	58.37	57.769	60.352
113.88	104.5	145.4	125.13	141.98	128.96	100.99	129.74	95.919	62.009	79.328	83.166	64.927	80.098
191.15	156.77	196.45	139.49	183.82	140.58	134.28	147.45	129.03	167.92	130.27	120.07	185.34	149.25
127.42	164.81	204.71	177.54	189.56	169.79	155.47	176.32	151.42	188.4	155.88	157.91	211.97	156.73
288.18	236.32	228.76	203.84	221.27	208.65	213.35	223.4	215.56	270.87	244.82	255.41	235.99	283
209.94	178.27	185.78	174.42	183.46	183	179.15	208.5	201.25	127.57	134.76	161.28	191.31	190.58
213.87	247.46	220.96	239.76	225.5	223.53	231.56	233.9	219.59	188.77	180.61	189.56	210.36	213.55
251.36	258.32	220.96	239.76	225.5	223.53	223.26	233.9	219.59	227.18	215.7	211.12	245.44	207.94
166.58	172.74	153.62	172.54	162.07	164.85	168.11	171.4	158.48	187.08	153.99	108.82	220.38	89.205
110.58	90.681	94.932	91.675	88.812	96.153	91.224	104.07	101.51	90.124	82.235	90.885	86.244	101.78
71.747	63.101	83.297	79.841	85.06	96.153	83.849	93.75	89.689	57.278	52.399	42.325	56.832	47.817
122.74	81.919	92.097	90.507	90.385	88.645	77.47	93.931	69.068	104.53	84.839	80.246	94.034	77.425
83.669	81.919	78.379	80.002	80.198	76.41	88.057	79.003	80.517	86.258	76.152	71.404	80.34	54.491
137.09	95.046	105.19	94.738	95.987	89.822	88.057	93.465	80.517	86.933	91.008	92.814	97.76	80.073
121.77	149.11	156.23	142.55	153.06	136.9	149.83	158.26	156.74	130.76	107.2	112.47	142.07	135.73
192.55	136.75	123.92	108.79	119.98	110.14	103.29	107.44	97.376	194.29	149.92	146.89	183.19	166.1
139.39	159.85	131.48	144.04	138.4	147.43	160.23	143.9	137.72	145.63	144.72	148.56	159.04	190.53
113.95	152.97	134.92	143.89	138.4	132.04	159.22	143.9	140.18	173.36	171.89	169.48	183.27	174.92
166.86	242.59	214.41	237.89	216.37	226.26	216.44	249.8	191.66	212.76	237.76	225.32	228.85	219.7
158.93	133.04	114.76	133.55	128.8	134.29	126.3	189.14	136.69	144.31	140.99	130.08	137.99	129.45
126.25	136.66	114.76	151.7	126.28	140.77	149.15	158.79	136.37	140.59	141.59	139.45	108.03	102.97
148.53	149.6	121.35	130.69	119.17	127.08	144.9	123.59	137.01	139.47	154.25	169.32	134.92	114.44
134.86	176.14	164.96	193.13	179.05	192.5	170.02	185.65	179.07	141.06	141.91	157.26	147.44	143.46
119.75	97.701	96.265	98.835	92.432	98.254	93.409	97.106	96.415	119.59	112.92	103.21	115.16	96.399
132.36	267.21	277.54	242.61	277.46	234.44	208.4	254.74	203.79	282.48	279.05	259.44	300.53	244.67
182.74	160.51	170.33	180.45	184.44	181.76	188.69	217.9	191.24	127.85	139.75	190.5	142.16	196.68
166.04	157.26	138.94	161.91	149.15	156.98	173.58	169.76	174.14	127.85	122.73	146.23	137.18	139.8
125.67	87.272	100.94	101.04	100.32	102.58	103.07	111.11	98.652	88.501	82.448	98.415	98.718	97.72
203.53	114.56	108.3	113.39	99.559	105.68	117.66	102.37	99.587	114.37	127.09	132.03	105.59	117.5
109.05	51.149	37.187	54	44.593	49.721	47.378	63.42	40.868	73.885	56.78	46.223	71.119	39.745
33.016	86.11	79.403	90.211	79.147	96.247	104.63	84.665	98.94	65.48	64.411	77.906	90.302	79.403
115.32	74.137	71.426	90.211	83.878	96.247	122.38	99.495	131.31	52.538	50.509	74.55	47.638	76.008
108.5	130.42	139.91	135.44	139.98	129.37	124.61	160.91	139.28	121.05	120.15	123.63	139.58	119.66
95.185	163.96	201.18	135.44	193.24	165.27	117.43	160.91	136.69	185.81	148.43	175.68	197.6	193.76
95.185	99.408	96.083	107.72	92.741	96.03	102.3	104.07	108.69	99.473	87.648	125.41	131.63	94.323
176.26	122.5	133.76	127.9	135.3	133.02	109.07	127.25	111.67	145.26	119.18	108.56	151.64	118.62
157.47	119.44	138.69	129.1	143.79	132.93	122.32	148.4	117.18	102.84	112.6	132.5	107.84	104.14
62.234	109.93	105.36	117.59	113.54	113.28	105.47	134.86	113.5	83.544	98.152	96.02	85.97	122.48
152.58	141.52	126.1	160.94	133.33	161.57	166.3	157.77	165.56	112.85	133.66	145.78	113.19	176.83
183.63	228.67	226.7	219.52	229.43	225.02	193.13	218.09	192.81	216.3	206.44	204.71	221.95	227.18
183.63	209.73	241.33	218.38	232.1	218.61	188.8	215.65	186.22	224.93	202.35	174.84	222.18	196.48
338.33	209.73	241.33	218.38	232.1	218.61	194.34	215.65	205.71	178.1	172.53	174.84	222.18	196.48
244.33	181.6	153.34	160.41	152.21	150.7	199.36	160.26	226.41	158.7	172.53	205.21	184.54	244.42
241.13	178.88	153.34	160.41	152.21	150.7	175.47	160.26	162.25	184.54	166.16	185.98	159.9	200.98
241.13	146.89	132.55	120.38	134.09	121.16	143.59	124.16	141.68	191.44	183.02	191.79	196.12	183.02
132.23	72.911	88.431	71.633	80.735	74.131	65.766	84.227	74.372	97.336	91.232	81.926	87.867	82.765
132.47	108.3	119.66	122.53	121.98	121.75	116.9	127.1	125.19	93.857	88.437	90.195	88.914	82.765
84.926	72.983	93.185	84.835	94.93	84.78	99.403	93.428	106.99	63.539	70.114	73.101	72.101	62.997
155.88	142.56	147.62	134.5	137.42	128.6	135.39	134.68	136.98	122.2	134.86	143.09	118.01	132.39
90.406	88.529	108.82	79.009	102.95	81.965	75.364	94.122	72.34	87.54	88.787	94.041	80.087	84.981
79.729	54.509	58.77	47.614	55.596	48.538	37.66	51.114	40.44	78.351	83.528	73.188	66.945	68.806
56.463	28.047	17.699	20.099	19.34	23.856	18.392	18.941	19.306	41.71	37.996	45.641	34.101	48.666
56.463	28.229	24.526	14.653	24.912	19.636	15.459	16.489	17.93	50.041	42.794	39.875	42.724	44.228
91.235	22.93	16.175	12.646	14.503	14.909	16.381	12.396	11.24	62.386	43.516	32.325	53.098	29.306
38.071	20.701	21.096	12.483	17.703	14.909	11.746	13.866	10.366	45.206	32.8	26.705	36.099	31.595
31.107	15.626	15.28	11.024	15.328	14.346	9.0822	12.935	7.2526	39.069	27.861	25.189	35.273	17.027
26.943	18.842	20.702	17.297	20.278	16.046	13.35	15.294	11.728	26.757	30.921	20.181	26.579	19.238
39.3	22.767	20.702	17.837	20.278	15.029	13.366	17.067	10.553	48.058	39.431	28.819	34.749	33.482
49.558	22.005	16.307	14.218	15.747	20.479	16.265	13.652	13.714	48.441	42.721	32.354	34.869	36.982
30.044	13.146	13.311	10.288	13.521	16.072	8.5711	11.935	7.1981	27.662	18.356	18.044	19.113	23.378
20.635	13.835	13.816	11.291	14.398	10.995	9.9247	11.744	7.582	18.29	19.271	17.117	20.021	16.677
22.897	21.692	26.322	17.994	24.498	18.691	17.251	18.443	15.874	30.632	19.571	23.974	32.653	26.529
32.171	20.954	17.631	14.913	17.086	18.691	14.128	15.391	12.318	36.738	35.234	24.295	26.541	27.405
28.144	19.168	18.066	12.385	19.393	13.93	11.312	13.236	12.907	27.826	26.837	25.092	22.561	25.007
33.94	17.58	16.832	13.441	16.284	13.602	13.706	13.319	10.759	25.372	24.386	22.318	22.341	22.134
24.571	10.031	12.439	8.4313	13.204	12.624	9.157	8.5845	7.7041	14.931	17.651	14.871	12.183	9.2977
35.59	15.539	16.478	12.045	16.76	15.918	9.2573	13.109	7.4382	19.683	21.27	17.247	19.15	14.416
44.006	21.037	21.075	17.887	19.249	19.177	17.249	17.918	14.272	22.498	25.552	28.547	20.736	24.506
20.456	21.037	20.567	17.887	18.769	14.827	16.421	17.918	13.74	24.07	28.363	28.547	20.561	20.538
37.242	36.263	37.1	36.699	36.41	27.974	27.968	32.742	23.942	31.931	36.068	37.853	35.041	36.325
37.242	19.413	22.813	19.547	19.968	24.575	13.93	19.203	10.1	19.277	16.511	21.379	20.721	18.953
20.696	45.31	42.231	37.507	40.483	45.781	39.15	34.264	33.248	48.66	51.066	53.019	43.949	41.076
20.696	38.138	42.231	36.178	40.483	48.159	23.679	34.264	22.481	38.64	46.375	45.249	43.949	28.636
32.363	29.413	30.482	26.536	33.983	39.257	22.63	25.774	24.845	31.612	33.419	39.329	32.064	33.597
30.884	34.423	28.542	25.469	30.789	36.045	22.184	25.446	22.117	58.908	46.469	43.321	46.885	40.36
28.231	38.252	35.983	29.367	37.434	31.889	24.282	28.239	23.078	58.908	56.745	60.419	54.205	37.655
38.981	39.866	41.218	32.42	39.525	38.717	31.986	31.243	28.643	50.838	56.745	56.18	45.81	43.392
73.473	46.989	36.59	40.269	36.697	37.759	40.703	39.148	32.288	65.341	62.104	61.178	50.969	49.369
76.391	48.841	42.751	43.37	43.186	45.765	39.823	39.249	37.103	67.711	66.115	71.008	54.637	44.614
59.29	47.296	34.357	32.36	33.335	34.686	45.081	37.247	43.642	60.094	69.381	57.596	50.27	55.091
59.773	52.266	39.024	36.263	40.13	43.006	46.753	35.076	47.749	94.303	76.161	61.612	74.201	43.182
50.036	41.916	33.248	29.256	34.054	31.778	34.063	29.069	35.984	50.768	50.903	63.053	42.31	81.407
53.172	46.804	42.532	34.276	40.824	37.512	31.999	39.326	33.802	80.964	76.385	76.299	69.752	83.76
65.365	59.072	50.094	47.641	50.168	51.409	54.698	49.993	54.39	63.965	70.908	77.402	53.045	80.15
96.012	54.089	54.813	52.203	52.809	61.272	71.751	47.806	64.748	80.747	70.826	70.967	79.222	66.822
98.501	38.103	35.501	46.765	37.449	51.633	71.751	40.272	64.748	75.769	52.913	41.068	65.371	43.42
98.883	63.072	46.753	52.648	49.813	57.264	73.923	51.404	66.047	49.128	60.77	73.101	44.686	60.461
81.229	65.652	51.061	89.865	56.616	98.223	98.758	88.064	98.104	35.178	47.576	52.121	32.806	54.568
90.089	113.96	118.38	106.73	113.87	116.12	77.776	102.27	68.814	109.44	116.41	89.934	122	64.347
87.666	53.604	53.863	48.893	50.285	56.288	44.289	47.058	43.441	77.64	71.371	69.53	61.71	63.976
55.55	73.046	66.807	69.086	67.871	67.97	88.489	64.188	88.889	75.754	81.567	94.51	70.78	114.16
105.53	93.622	82.442	81.953	81.202	82.291	93.09	79.379	87.549	106.67	109.12	103.21	96.129	109.42
110.09	55.319	48.034	52.521	52.019	54.461	65.101	59.969	71.541	92.476	69.741	70.704	80.232	82.616
99.872	89.777	93.759	64.058	88.753	65.125	74.694	71.378	62.068	115.01	96.22	90.398	142.44	105.18
156.12	180.94	198.16	175.48	200.18	178.23	138.37	179.61	163.12	131.11	119.93	129.94	142.66	179.88
188.96	90.524	97.131	107.19	97.278	118.91	123.92	109.04	129.77	81.356	62.246	57.568	55.912	73.434
83.436	63.213	52.176	52.373	52.613	48.183	49.639	62.219	61.57	56.431	62.777	61.22	55.258	59.078
103.21	135.21	126.45	134.95	119.44	134.15	149.95	130.3	143.66	133.67	135.38	143.55	144.35	155.01
179.74	83.986	83.787	103.45	88.154	101.28	101.52	103	108.53	82.227	76.366	78.439	75.738	95.217
151.4	120.18	92.349	105.19	98.591	128.72	100.94	113.15	96.809	91.23	108.08	128	79.214	126.09
166.85	69.81	86.407	81.424	85.311	81.599	108.67	80.225	107.28	65.645	67.407	60.236	48.6	60.763
82.535	80.405	97.956	89.742	96.052	92.352	74.635	134.11	75.44	61.881	67.535	74.426	111.6	73.022
97.149	145.31	152.48	130.95	152.83	143.99	132.11	140.73	152.83	135.46	135.87	132.44	135.44	134.48
111.38	110.05	119.4	108.7	118.45	118.73	94.015	124.51	98.221	171.27	120.54	92.562	159.43	89.294
105.54	112.22	101.09	123.01	104.71	124.8	132.4	121.07	135.26	131.01	120.35	92.094	128.46	99.038
115.33	104.2	98.866	109.72	104.43	123.36	109.16	112.58	141.98	88.288	90.633	92.348	97.598	97.842
85.305	56.38	57.894	76.158	65.128	86.958	76.014	77.805	62.305	49.133	63.137	65.859	49.556	53.614
93.079	62.337	51.937	64.416	53.314	58.32	60.421	58.63	60.09	75.352	76.153	80.009	70.039	66.02
96.352	106.67	146.76	106.21	149.23	106.21	79.665	117.41	76.42	86.813	93.271	89.472	95.796	98.391
75.711	96.458	97.984	103.49	98.527	101.16	122.76	104.28	112.18	86.228	90.003	78.594	88.547	79.525
73.516	102.61	111.67	112.72	117.27	117.72	120.68	125.04	125.61	74.348	90.826	91.766	64.761	96.167
102.36	101.29	111.67	133.43	117.27	117.72	120.68	129.46	130.69	99.162	96.869	96.662	88.525	96.167
159.66	147.24	150.67	107.99	140.49	107.17	93.505	118.36	93.892	127.17	109.03	112.93	124.43	123.49
67.567	93.446	92.931	72.66	89.508	74.642	75.053	86.925	75.408	123.09	104.02	121.36	124.35	139.32
73.584	112.05	127.22	97.227	123.33	103.23	94.587	93.669	97.508	141.62	129.93	111.02	133.49	120.08
71.394	59.394	50.865	63.87	49.529	58.709	82.007	61.485	80.842	78.174	68.878	90.558	73.837	84.913
169.46	98.083	89.189	75.22	83.848	77.095	80.172	86.114	93.985	118.93	109.3	126.58	107.04	127.22
20.887	37.838	36.711	32.021	37.4	36.423	26.793	33.635	24.407	34.846	44.669	40.845	39.904	30.01
53.969	45.441	36.711	38.429	38.267	41.726	37.787	38.295	29.421	45.411	54.881	57.388	54.075	39.272
40.587	34.739	30.143	31.173	31.213	31.763	31.204	28.902	27.493	46.701	41.879	41.082	49.343	35.67
112.89	63.817	44.057	67.527	47.234	88.745	59.881	61.073	55.462	110.15	92.109	85.173	80.367	68.747
84.3	107.81	94.453	110.84	96.752	102.41	102.05	108.54	106.66	135.34	124.37	121.59	118.32	137.95
79.85	107.81	94.453	110.84	96.752	102.41	102.05	108.54	106.66	99.44	106.86	106.32	96.61	110.98
105.84	111.76	86.874	82.609	89.178	92.796	96.346	82.573	104.79	118.97	123.51	137.96	116.13	165.76
105.84	119.1	142.14	112.08	121.65	108.09	105.41	110.5	98.43	138.47	134.04	123.88	121.39	120.05
158.02	137.43	151.74	126.33	142.41	123.34	112.8	134.52	109.61	142.67	134.04	123.88	166.22	119.28
125.03	96.991	89.368	89.708	83.284	88.346	90.33	88.614	86.542	115.62	117.8	112.59	104.67	137.45
141.42	96.991	74.783	74.002	74.732	70.302	76.64	70.631	74.777	192.36	148.31	139.44	168.18	175.49
127.65	60.422	42.209	53.867	41.11	52.541	66.296	47.164	60.462	102.63	66.957	98.285	67.476	81.18
124.36	140.33	114.98	127.6	119.93	121.95	143.63	122.18	133.61	132.1	140.97	174.88	136.92	152.81
110.21	128.63	157.83	124.51	154.36	146.33	118.01	133.49	122.06	89.124	98.917	103	99.508	98.761
64.723	39.498	49.434	38.684	46.173	41.729	49.443	44.372	45.458	41.56	47.451	40.194	42.835	46.105
161.92	57.837	65.19	62.19	62.225	62.53	64.013	70.133	65.091	56.641	61.347	70.357	65.875	63.033
89.096	159.75	170.59	169.67	168.86	179.14	165.12	168.95	168.01	79.835	111.25	132.17	104.55	133.64
170.26	185.92	192.52	179.79	190.6	171.83	129.83	177.49	128.86	234.94	218.47	178.4	256.28	185.33
167.29	243.02	215.48	226.65	222.14	211.66	223.79	211.65	210.13	247.33	246.72	241	238.72	278.69
83.242	325.05	277.18	280.11	285.13	279.89	274.3	282.71	269.84	284.98	293	328.95	299.71	402.51
99.811	153.15	130.72	145.93	131.47	130.85	141.29	129.37	146.79	153.31	120.84	113.38	173.03	143.03
128.85	214.77	174.52	221.3	184.51	204.92	218.32	209.93	216.77	175.18	175.15	171.17	189.65	191.9
70.894	63.895	60.16	65.108	62.284	74.973	72.427	65.347	72.859	93.88	74.26	78.355	76.238	107.59
135.24	90.863	108.14	120.69	101.93	118.62	127.11	103.39	128.92	88.631	72.509	89.816	76.238	95.194
176.93	82.579	78.73	77.272	74.633	76.033	90.569	69.456	97.39	116.86	104.49	76.51	101.49	92.711
110.45	98.367	90.569	86.447	89.045	79.498	85.08	87.714	93.972	107.66	100.25	96.555	101.49	128.83
95.766	62.415	71.036	62.613	70.431	92.088	60.463	73.005	69.887	79.636	76.017	80.915	60.021	71.275
98.547	119.62	127.76	118	125.59	109.71	96.955	118.83	96.661	153.25	139.68	125.96	150.98	114.31
159.92	77.835	74.933	79.01	73.122	70.598	86.982	69.03	78.132	112.8	100.61	89.999	101.38	98.823
162.01	145.92	159	117.12	151.23	113.69	103.7	134.53	101.67	152.85	138.04	170.46	151.38	203.68
63.455	45.762	46.348	47.275	45.732	37.424	27.316	55.249	36.317	66.186	63.61	48.906	75.855	46.135
128.37	167.12	154.55	144.44	155.88	141.18	136.14	141.9	119.75	163.92	172.06	164.22	169.37	142.08
110.31	86.713	79.342	82.257	80.449	104.81	101.1	79.728	112.5	83.267	94.663	104.88	81.2	106.46
146.87	86.713	77.406	90.377	77.822	104.81	101.1	83.853	107.78	84.813	101.61	114.61	76.025	106.46
218.48	122.15	139.52	129.92	136.73	130.97	109.98	127.33	123.67	130.11	115.78	115.92	146.68	143.47
119.17	175.78	163.19	170.36	162.5	172.76	179.01	173.91	166.45	158.84	177.31	208.91	144.66	236.95
119.17	103.69	92.58	106.41	101.13	110.94	124.24	106.73	127.52	93.149	106.45	123.58	98.745	98.756
99.473	56.683	52.69	56.857	50.672	51.615	61.504	64.087	66.604	73.841	82.306	67.039	71.394	62.103
88.548	57.769	80.98	79.225	81.184	77.67	63.051	105.78	68.43	61.894	76.146	67.039	64.388	50.261
239.29	146.99	162.71	162.31	161.53	161.12	165.29	170.31	176.97	136.49	135.56	129.43	152.4	130.24
80.176	186.53	223.3	202.78	208.62	208.33	164.35	216.03	148.57	136.49	155.91	146.63	152.4	117.13
132.6	132.42	131.29	115.32	126.78	112.04	99.173	117.25	94.856	191.15	159.09	130.32	207.16	105.35
88.578	224.97	235.78	205.53	239.58	214.16	202.08	225.69	197.68	138.25	191.79	188.35	175.8	218.17
126.65	90.455	95.378	111	101.03	113.48	92.999	112.87	103.78	68.468	76	70.084	72.092	54.633
167.73	82.682	99.982	102.32	96.376	104.82	107.77	94.52	119.1	98.642	94.54	101.17	108.77	116.3
165.15	116.76	135.98	126.35	132.78	119.97	127.84	133.73	133.79	110.58	93.422	95.33	106.34	134.52
160.96	122.72	96.429	117.3	100.11	114.29	128.16	111.86	137.84	127.97	114.53	144.5	112.61	142.73
176.23	101.84	92.626	107.27	96.113	101.14	128.25	100.52	137.84	103.81	97.496	102.35	97.465	115.09
114.32	144.42	124.26	143.28	146.73	147.56	104.52	156.52	105.17	130.99	132.75	141.21	122.34	148.19
88.138	134.16	170.98	143.28	160.76	147.56	104.52	151.76	105.17	111.45	109.91	107.35	118.58	77.76
109.8	118.33	144.46	147.44	141.68	148.92	127.98	147.45	135.8	131.32	112.66	101.31	123.01	111.79
125.72	92.364	71.806	101.31	72.596	95.128	109.1	89.883	100.35	133.06	120.96	123.69	101.05	106.35
71.968	109.26	97.541	126.47	101.55	119.3	110.73	115.73	100.35	73.74	100.14	100.96	77.752	97.435
120.26	84.746	104.58	93.797	99.355	93.784	106.8	102.81	108.98	63.205	74.396	88.214	72.444	85.76
133.37	175.85	159.32	162.15	158.04	147.62	163.43	160.99	169.77	142.49	166.67	145.18	135.43	161.99
77.602	68.991	73.66	61.362	68.984	61.247	50.994	68.105	44.061	83.423	86.012	83.009	111.85	70.541
71.039	51.476	44.632	48.989	44.661	50.23	40.228	56.663	37.415	83.423	62.566	65.144	111.85	67.901
65.949	33.712	41.279	28.871	37.253	30.595	32.91	34.438	35.19	51.792	44.798	45.826	55.556	45.545
62.687	64.806	68.875	96.877	65.808	71.71	86.189	97.407	95.698	77.657	69.642	61.091	68.944	56.965
147.11	130.61	133.85	139.35	132.02	148.41	139.23	124.26	157.49	98.366	105.56	121.68	101.17	120.64
253.46	133.98	179.62	140.93	170.47	150.15	94.15	153.4	90.873	177.78	142.85	122.21	193.63	120.64
168.1	49.492	64.455	59.591	57.184	54.289	52.498	59.401	47.304	61.492	56.449	60.685	59.706	73.519
99.184	70.434	89.768	71.766	81.098	80.793	68.7	72.747	74.241	73.047	66.006	69.755	82.393	63.304
131.18	69.938	85.263	76.937	62.653	68.978	119.67	70.474	127.21	51.88	54.866	71.689	62.943	72.569
178.24	163.8	137.25	147.55	139.99	157.82	141.9	137.35	150.28	103.91	109.24	127.34	142.32	135.32
158.67	103.94	118.62	77.457	117.29	83.878	68.786	89.299	69.3	103.51	109.24	104.58	113.77	105.31
89.22	65.803	65.813	61.766	68.619	62.091	55.914	72.208	55.896	74.754	66.41	60.46	64.027	66.51
92.023	142.29	151.04	148.94	150.8	137.18	119.82	149.57	130.31	172.87	148.69	141.8	165.6	163.2
103.76	115	106.73	117.38	109.31	106.39	122.75	117.8	134.94	86.942	97.576	104.23	86.101	117.29
84.448	63.426	99.935	70.709	91.178	80.934	87.495	112.41	87.32	67.54	57.866	43.54	90.505	47.251
100.25	120.87	156.18	126.05	147.28	129.07	113.09	150.53	111.32	69.808	82.732	105.58	92.258	116.65
112.75	80.435	91.446	69.904	84.229	64.187	74.716	74.636	79.226	69.808	82.732	86.541	83.152	90.992
107.82	109.15	89.551	96.069	86	95.235	106.47	97.515	106.7	117.97	133.25	164.32	95.004	170.51
83.897	94.92	139.36	86.097	132.23	97.596	61.514	100.75	63.122	111.82	85.939	74.212	113.58	67.31
63.71	84.158	91.642	63.464	85.858	70.163	61.602	80.166	60.711	114.11	78.921	62.342	132.44	68.828
40.852	23.672	37.424	20.412	33.671	30.566	16.057	20.116	20.874	35.327	35.87	34.256	36.621	36.1
69.195	46.683	46.63	52.546	49.048	53.551	57.352	58.057	55.228	57.932	50.193	51.914	49.895	57.229
113.59	53.722	54.15	44.586	52.742	47.708	37.595	43.686	49.183	73.255	62.718	60.16	66.603	72.703
90.811	57.533	41.042	47.759	43.868	56.059	54.939	52.725	59.242	100.45	73.888	66.274	95.769	63.94
62.848	39.745	24.959	32.368	25.592	27.737	33.715	27.141	37.223	70.747	56.737	51.929	54.9	39.797
119.17	69.361	62.572	65.362	60.914	61.382	65.622	60.244	65.057	93.089	83.148	92.656	84.281	74.281
112.56	43.878	34.998	46.525	38.901	54.378	61.163	45.171	69.455	66.865	49.032	42.478	53.432	53.11
115.03	96.948	84.893	118.17	97.83	116.2	147.16	115.66	162.61	113.14	73.432	82.434	104.69	92.954
147.92	62.64	63.526	70.081	64.365	69.84	71.825	67.6	81.483	71.176	68.861	80.052	54.129	90.552
113.18	90.386	92.742	97.232	93.627	94.248	112.6	91.175	107.41	71.176	81.812	86.722	59.901	54.061
122.98	129.58	144.75	115.14	134.24	111.98	130.03	128.8	140.94	150.43	139.18	127.34	134.17	136.5
79.344	130.06	109.3	129.15	114.3	131.76	125.2	124.49	125.49	111	115.96	137.8	99.82	110.41
51.381	49.729	58.59	63.037	56.129	58.767	79.945	56.31	74.074	76.19	64.668	74.624	69.524	60.474
69.056	92.557	100.46	95.965	100.93	98.691	94.83	101.34	93.684	89.884	84.593	80.686	97.071	72.196
104.47	84.162	100.46	71.559	94.293	71.077	75.738	81.703	78.134	102.15	91.975	89.258	91.8	84.565
72.178	54.942	55.775	52.036	55.094	54.675	51.561	51.686	51.615	57.513	59.607	64.598	52.589	74.388
189.47	118.04	117.81	137.46	118.67	130.24	113.51	127.83	105.1	102.47	114.05	125.18	86.923	147.6
87.174	180.35	193.91	186.48	187.37	187.05	202.95	212.74	204.81	137.7	147.04	171.71	145.69	175.81
177.42	235.2	224.21	186.48	222.68	201.68	172.37	212.74	187.4	198.78	211.42	242.61	214.63	252.53
127.87	134.29	123.38	115.61	126.58	118.64	138.46	124.03	149.71	124.56	151.14	170.11	98.959	187.02
109.68	103.94	101.05	120.45	114.81	117.71	136.57	124.03	149.71	81.035	90.018	87.675	61.268	117.32
72.377	63.359	54.603	60.332	55.793	62.292	71.653	54.714	77.878	52.531	59.694	62.729	41.393	57.184
69.953	57.278	54.603	65.491	63.016	66.96	79	66.631	80.72	52.531	55.86	53.209	39.477	51.649
74.223	31.071	31.774	27.231	31.072	35.033	39.177	23.341	35.364	54.582	39.209	39.376	46.401	42.882
50.672	26.12	21.311	27.231	22.705	35.033	39.177	23.086	35.364	37.52	36.462	37.375	28.814	32.84
54.572	23.987	22.702	17.805	22.424	17.138	18.361	16.932	23.34	31.884	32.718	40.095	28.266	45.438
80.376	45.964	47.765	35.748	50.176	46.828	32.751	35.076	36.604	63.891	59.972	65.534	49.862	75.363
83.07	79.805	85.269	56.909	80.645	63.325	56.189	61.159	53.525	142.13	112.11	103.79	129.69	111.22
97.603	97.619	111.64	75.063	98.847	69.867	63.289	75.662	62.295	172.71	130.43	92.992	194.78	102.09
105.77	96.268	78.529	93.859	76.227	86.167	94.881	83.223	103.94	101.67	100.58	102.01	88.152	106.35
54.673	39.176	36.254	27.978	35.385	32.45	31.336	30.28	37.716	54.843	52.746	48.086	46.735	38.889
38.525	35.046	27.638	26.134	28.598	28.811	30.238	29.354	35.672	38.678	54.425	47.627	37.122	40.827
54.298	56.784	54.924	46.422	48.512	46.979	61.65	45.324	63.594	66.341	70.874	81.765	61.829	102.38
132.77	92.942	73.188	102.7	78.048	102.34	120.11	82.365	114.86	109.82	111.02	133.61	81.809	140.04
121.71	72.158	63.858	64.699	67.119	69.77	61.048	69.947	55.864	111.17	102.21	83.597	94.349	72.3
99.036	63.36	63.858	71.49	67.119	73.445	70.943	71.128	71.704	67.49	63.557	70.631	56.619	70.641
75.212	58.384	72.686	60.521	71.03	58.739	68.877	67.835	69.559	71.571	67.33	70.631	71.097	91.245
83.805	54.953	60.881	46.851	59.086	50.955	47.104	45.101	42.739	74.226	67.33	59.297	71.097	61.426
98.519	197.89	198.96	181.98	199.93	187.46	154.16	200.18	149.92	217.31	205.7	181.71	246.88	178.23
136.75	149.58	162.71	179.28	163.06	175.41	154.34	171.16	147.92	122	119.65	106.63	148.11	116.35
62.436	107.05	111.18	139.16	115.19	123.12	142.13	135.4	143.39	85.995	99.411	85.44	100.89	92.739
72.825	103.32	107.71	121.56	112.93	116.56	125.49	116.67	135.72	111.61	102.02	78.455	101.43	92.739
67.391	135.06	130.41	120.62	125.75	127.64	137.55	150.12	135.72	113.32	112.72	148.41	98.729	137.66
120.88	116.71	114.24	120.62	118.4	122.71	122.66	114.96	118.72	105.39	108.44	119.47	93.937	126.68
124.91	113.67	111.03	119.31	111	106.72	130.85	115.17	123.68	78.722	87.959	109.57	84.48	102.56
106.08	106.23	86.752	117.44	95.183	113.51	117	109.59	124.37	75.104	103.12	106.03	68.61	82.737
93.43	52.988	56.078	46.63	51.485	51.146	61.858	47.061	57.823	65.261	65.222	85.163	43.313	56.027
79.175	47.735	36.949	45.384	43.147	51.146	61.858	52.939	71.667	49.886	53.379	62.377	42.399	57.462
86.735	37.095	30.11	32.714	34.88	37.195	33.084	37.656	34.469	49.886	41.139	39.646	42.399	41.321
88.522	76.916	91.493	63.225	86.362	69.212	59.817	58.848	54.952	103.42	106.71	119.29	152.7	99.019
87.659	66.578	52.004	58.876	54.367	52.002	58.561	56.323	53.147	98.489	103.63	102.51	73.512	101.63
111.39	60.523	52.004	57.451	50.116	64.008	62.03	59.349	60.102	80.043	66.14	56.343	74.435	48.406
174.09	105.87	106.92	80.634	99.085	82.555	77.976	72.553	77.35	162.89	148.31	157.46	153.03	154.66
148.91	134.94	118.73	104.39	114.35	114.92	94.244	107.85	101.2	116.61	133.22	140.58	106.93	164.78
118.56	91.607	73.829	96.577	76.771	99.459	94.244	93.485	89.315	79.859	81.898	74.723	78.139	101.32
83.66	87.217	94.584	98.95	87.855	99.459	107.32	93.485	111.43	75.757	81.885	98.376	66.039	105.03
138.86	107.72	108.67	140.89	112.96	136.83	158.9	129.96	172.11	75.757	84.811	99.788	74.904	121.42
162.35	159.74	164.71	168.84	159.43	171.43	188.49	163.43	192.38	94.657	113.3	136.57	115.88	166.92
74.512	61.135	84.667	74.096	86.781	80.418	57.458	94.685	65.287	45.067	51.154	43.874	57.284	38.405
100.1	61.185	67.306	65.75	62.733	63.105	76.904	60.135	79.346	84.307	61.403	64.799	75.467	79.167
149.51	107.34	101.13	106.79	96.061	104.81	105.68	100.43	116.87	141.71	126.8	100.53	140.8	111.23
148.22	192.04	186.97	188.03	183.83	178.05	187.15	199.64	181.68	176.04	163.19	164.12	187.95	170.61
146.34	209.44	234.3	218.92	221.13	218.39	191.67	212.21	180.78	176.04	163.19	164.12	187.95	177.2
166.83	115.51	99.223	138.5	102.55	131.9	160.37	122.84	164.07	100.04	109.53	132.31	96.004	139.55
85.878	124.78	140.25	132.22	139.27	132.63	133.73	135.04	125.9	100.04	109.53	129.28	101.69	145.76
81.024	93.811	102.5	111.47	102.74	97.695	91.522	110.27	87.703	78.213	75.776	76.225	84.231	67.752
80.44	137.25	147.57	156.54	144.83	130.93	140.68	145.03	128.89	84.771	96.101	99.037	97.138	89.905
114.53	81.58	83.008	83.622	80.224	83.78	71.065	85.027	82.441	90.92	74.179	89.286	97.138	78.884
153.81	104.11	97.201	132.22	101.37	124.53	147.46	123.72	159.62	92.421	105.17	101.18	92.029	101.18
109.36	123.64	124.63	114.96	113.69	110.24	103.4	107.99	91.837	127.74	133.85	135.93	139.93	123.87
88.401	81.177	91.571	67.261	77.943	62.107	62.831	67.854	57.312	100.37	103.83	100.32	87.039	103.89
63.237	49.354	49.707	63.919	50.452	63.625	68.9	62.282	74.423	35.458	37.445	38.955	37.876	49.157
79.27	31.546	32.228	29.382	27.061	29.93	35.024	23.025	41.523	54.105	56.971	51.73	38.369	53.921
92.015	86.959	102.56	80.401	98.936	89.455	73.996	80.741	80.064	107.51	91.224	105.59	106.52	82.393
110.57	44.008	51.414	30.446	43.645	35.161	35.361	30.88	35.679	84.378	74.876	64.088	79.03	71.046
101.75	33.082	31.811	20.424	30.809	27.22	18.997	22.982	22.318	55.919	42.961	45.987	49.73	67.168
59.553	26.877	31.811	21.875	30.809	23.334	17.823	22.591	20.365	57.415	41.264	37.945	63.871	43.594
76.032	66.163	55.38	60.127	57.943	58.364	59.901	63.811	59.477	100.49	75.09	66.816	86.423	46.933
86.435	46.713	48.476	34.261	47.509	47.155	30.749	41.232	32.755	94.988	66.372	53.117	78.166	49.558
67.284	49.996	48.476	41.054	47.509	42.62	33.069	45.073	32.755	52.113	41.216	46.355	48.455	49.558
39.052	32.545	23.504	19.081	24.15	21.35	14.588	18.861	12.655	86.545	56.411	44.171	66.651	40.464
51.555	52.385	36.517	29.009	35.78	35.169	21.58	34.075	20.04	119.97	85.027	62.267	109.98	51.723
38.737	41.274	35.155	31.456	36.282	34.754	23.977	31.357	23.656	71.269	55.572	43.638	61.112	41.901
20.518	18.041	15.135	14.39	14.344	12.716	12.48	14.555	14.988	21.708	26.497	21.07	19.294	22.083
47.308	32.362	20.442	24.198	21.711	25.549	23.957	22.888	25.372	45.605	48.086	50.953	34.918	48.321
49.081	26.769	17.185	19.561	17.346	20.897	26.073	21.34	28.355	51.362	48.293	49.811	44.428	74.842
41.704	35.984	31.73	27.748	31.12	26.276	22.241	26.539	21.541	49.711	47.748	60.784	45.801	44.228
53.728	67.578	59.226	60.629	53.45	55.288	47.61	60.095	41.199	89.165	81.966	78.971	88.808	70.378
59.452	88.447	77.244	77.752	74.692	77.304	75.835	73.48	73.172	100.01	107.83	88.998	88.808	67.896
76.331	89.074	73.155	79.952	75.698	78.842	73.024	78.622	67.323	100.37	101.89	84.663	88.855	74.209
79.946	93.587	84.287	96.412	85.141	89.578	87.888	90.454	84.053	99.798	101.89	97.748	84.485	84.96
70.739	87.469	75.86	83.288	73.37	82.762	87.888	76.209	84.053	56.411	82.086	97.748	58.003	119.24
70.89	100.56	103.15	114.16	104.34	119.02	110.32	111.2	107.78	74.112	99.305	99.484	88.335	86.727
80.402	65.279	60.074	76.9	59.282	77.669	74.249	72.201	73.101	53.269	46.841	46.981	58.127	51.963
64.928	37.663	33.269	33.559	33.664	48.966	42.46	39.619	42.273	63.346	61.868	44.635	59.616	46.185
96.31	78.301	92.612	92.082	91.249	104.69	80.055	93.542	81.969	71.685	71.299	75.352	74.311	71.369
145.48	134.05	121.78	152.09	128.64	143.14	174.97	143.54	190.67	84.017	109.65	106.92	102.84	118.57
191.61	85.833	75.538	116.53	82.737	113.92	151.43	102.05	172.4	65.839	76.924	79.348	63.628	89.595
93.422	190.22	193.98	186.33	197.91	188.12	159.86	193.31	152.15	149.1	160.48	158.56	163.06	160.27
107.66	93.757	123.43	101.58	113.42	96.144	81.229	94.057	77.49	141.89	105.46	92.523	151.02	90.086
54.208	80.7	87.96	91.309	83.863	82.177	85.884	94.057	81.643	76.322	83.479	76.362	73.335	67.155
41.083	64.192	63.498	55.809	65.567	61.068	51.13	58.663	52.096	81.64	71.124	69.555	83.246	69.737
78.127	89.149	80.889	88.094	78.641	101.24	83.462	85.108	75.277	110.76	100.42	78.055	108.14	77.308
163.93	124.93	115.85	118.87	115.54	125.59	89.623	117.33	85.009	158.68	148.8	116.03	181.88	98.416
126.1	119.57	134.85	135.86	131.54	135.09	113.11	131.23	120.4	96.345	111.9	120.27	113.3	138.56
133.74	87.59	98.081	92.456	96.959	94.27	96.87	99.761	101.51	103.62	105.69	93.227	90.48	75.955
77.105	72.52	65.677	63.671	63.54	59.68	63.068	69.243	54.487	75.684	87.906	95.301	76.883	68.937
52.502	65.774	74.769	66.922	67.207	60.58	70.624	79.407	72.609	69.217	85.591	72.526	83.231	75.613
61.298	48.113	47.193	42.6	48.451	35.113	47.156	38.499	49.719	64.078	61.544	64.58	49.676	75.613
145.68	73.253	76.944	69.919	70.634	66.208	64.844	78.26	67.44	115.56	91.162	73.78	107.33	68.69
130.31	150.62	126.01	148.89	133.4	131.44	177.26	142.11	185.17	132.76	138.28	169.21	122.91	155.09
106.46	116.94	109.06	101.36	108.86	102.51	90.63	100.88	83.677	83.494	101.72	116.55	88.192	86.863
126.61	121.09	109.06	101.36	108.86	102.51	100.82	100.88	100.72	123.64	98.126	107.95	141.62	126.28
194.74	97.219	97.708	102.26	101.75	101.42	100.82	101.3	100.72	111.1	94.246	90.518	105	66.193
205.74	97.219	108.45	92.143	103.31	98.668	90.617	90.181	97.308	112.23	94.246	104.4	105	124.42
65.657	59.581	61.323	68.579	60.761	69.675	73.118	70.008	67.19	44.439	50.871	52.476	34.572	77.114
76.003	142.08	143.68	134.83	147.74	136.67	115.45	142.71	112.87	129.97	146.34	135.44	131.9	152.22
90.372	93.718	98.718	83.559	95.547	83.536	91.113	94.271	91.118	129.95	108.54	88.616	115.35	80.315
118.59	242.3	213.48	226.84	208.62	208.85	175.73	209.46	166.53	292.32	250.1	218.82	297.16	183.16
107.6	113.66	129.39	89.773	118.26	87.676	70.492	101.83	71.481	165.09	147.91	131.6	147.43	108.29
111.8	214.6	211.76	192.4	208.53	194.69	186.52	190.78	187.6	188.86	211.32	212.17	217.12	185
111.44	222.83	232.92	222.33	228.7	220.63	194.49	221.83	191.04	175.35	186.62	199.52	181.86	203.32
103.24	84.886	87.881	91.15	86.266	88.305	110.24	87.221	100.16	67.113	77.643	88.158	60.262	72.094
87.593	100.35	87.24	116.94	94.49	118.13	130.18	109.25	137.66	59.486	88.468	95.036	55.09	79.157
71.312	98.507	97.18	88.856	99.756	97.322	86.896	88.747	88.262	89.163	103.15	97.972	87.73	72.438
105.82	98.507	85.786	80.532	83.927	81.175	77.541	75.489	70.899	123.12	121.35	99.739	108.72	87.688
105.82	88.675	90.059	68.402	80.54	70.564	75.393	71.089	68.413	117.61	116.98	101.93	103.44	87.324
126.97	172.35	158.4	146.74	160.88	152	162.56	159.94	164.42	134.85	160.64	169.18	151.03	130.76
108.95	138.69	134.56	134.33	134.95	138.76	133.01	135.43	126.17	120.81	149.15	136.89	99.978	113.77
60.453	71.946	81.61	94.014	85.72	96.888	80.471	90.219	81.366	63.325	65.898	68.03	59.187	77.432
68.376	107.13	92.396	85.448	92.664	91.971	102.42	90.219	98.277	128.89	133.17	125.63	135.73	116.73
81.72	56.735	60.244	49.235	57.472	46.215	50.061	54.793	43.991	79.339	67.987	59.668	87.581	56.362
77.315	95.675	86.901	76.248	80.16	74.181	71.039	70.196	68.233	144.99	135.75	123.65	131.37	100.9
28.497	54.604	49.037	44.472	48.969	48.181	43.448	43.892	41.069	54.839	67.726	87.421	45.149	53.229
83.712	75.985	70.173	71.184	71.508	85.155	69.046	61.349	65.083	88.443	94.027	108.58	75.591	81.766
83.712	76.018	70.856	80.702	71.508	85.155	69.046	73.03	65.083	82.24	91.248	93.385	79.998	70.804
85.11	69.978	68.371	63.392	70.719	61.198	56.37	65.355	55.87	91.41	82.464	80.46	94.536	87.735
99.87	118.49	126.58	129.63	123.62	128.44	129.17	130.65	129.27	91.41	96.808	103.54	62.559	106.32
94.114	118.49	126.22	125.3	119.2	123.07	117.16	127.72	137.76	120.96	111.61	119.97	106.82	101.82
94.114	201.72	237.49	210.92	224.21	206.37	177.28	214.35	174.77	128.9	155.5	163.44	175.33	177.56
84.174	177.7	170.67	202.85	183.23	223.81	173.83	187.15	173.39	145.02	156.84	135.46	158.65	104.99
99.638	94.942	82.388	87.325	80.976	84.662	103.4	83.603	93.156	103.26	105.95	106.42	110.68	88.124
113.64	91.834	74.079	101.43	72.554	84.662	103.4	97.131	88.624	117.97	126.04	124.6	89.935	109.74
60.273	129.56	111.94	123.59	114.93	122.85	131.38	120.54	127.08	115.01	126.87	125.98	122.25	113.87
119.82	114.76	113.49	106.23	114.5	110.47	105.86	111.08	98.917	121.92	115.68	125.98	137.68	110.36
206.1	202.83	214.9	181.78	205.54	192	150.87	186.16	149.08	243.12	227.7	202.69	263.83	185.17
181.24	239.45	228.84	215.54	210.3	203.66	221.04	202.93	221.97	237.23	239.31	259.13	260.97	234.64
133.22	183.17	204.4	197.54	187.8	187.07	153.09	196.58	151.46	184.48	185.07	165.77	192.76	137
139.88	161.24	175.78	183.45	173.44	189.71	171.93	170.11	155.3	173.5	178.67	153.41	168.46	129.16
138.99	190.23	188.64	212.69	193.98	209.92	211.08	201.53	219.21	141.1	167.79	167.84	148.55	166.57
119.68	116.94	102.48	142.28	116.41	130.24	143.99	135.74	132.1	141.21	133.72	143.38	106.38	120.36
85.941	100.72	90.675	104.87	96.524	108.76	107.94	102.32	104.06	74.119	86.915	111.44	71.355	84.832
69.597	97.718	84.695	80.737	80.502	81.014	91.94	80.554	86.703	93.081	93.192	108.83	85.155	104.37
89.146	87.039	93.627	88.06	90.218	94.356	81.599	85.585	88.43	79.004	95.711	88.613	73.317	95.479
92.384	99.935	92.206	82.604	89.063	85.697	80.491	85.585	88.43	116.45	120.78	108.47	112.22	114.3
92.384	122.06	159.65	115.07	149.32	119.77	101.02	125.76	93.46	157.73	140.01	117.61	185.77	113.47
184.13	351.45	355.53	331.32	348.26	334.54	292.79	325.59	290.59	293.85	317.47	338.79	341.73	328.81
175.21	296.8	277.48	256.37	271.87	258.32	298.15	260.25	291.05	257.16	279.3	292.06	310.33	279.36
175.21	295.94	289.61	304.85	286.11	280.46	289.02	289.55	301.23	257.16	279.3	292.06	278.33	281.05
228.7	342.21	377.18	344.15	370.58	339.55	341.11	344.1	352.94	252.35	267.74	292.24	311.38	308.02
122.72	213.09	222.6	214.66	217.68	202.33	225.62	213.72	248.2	160.04	178.61	221.49	190.34	206.02
113.55	109.08	105.97	121.28	98.237	121.85	100.66	123.11	90.64	123.72	113.98	113.2	131.17	119.17
113.55	108.62	105.97	104.98	98.096	98.879	109.99	104.88	102.53	89.703	85.119	99.206	94.143	103.65
63.224	120.46	106.66	137.09	114.08	131.74	138.55	131.36	140.31	89.703	99.977	120.08	102.76	100.9
61.276	45.055	40.829	55.535	38.1	38.898	58.139	51.634	55.08	43.469	49.982	61.065	52.323	52.136
81.308	29.585	30.244	32.647	29.624	31.474	35.757	34.508	34.491	31.69	28.808	27.989	38.485	35.029
141.44	38.959	56.417	41.614	48.976	36.484	36.85	43.006	41.726	41.444	41.307	38.027	46.982	36.825
78.349	57.029	62.816	57.201	64.457	57.54	45.73	54.229	46.594	71.205	79.405	94.356	66.481	98.601
76.06	38.671	42.368	32.563	33.178	29.074	30.471	29.278	27.708	60.561	54.822	52.751	63.423	62.391
62.121	30.499	30.679	22.771	27.61	24.904	16.503	21.95	16.335	73.436	49.061	37.983	64.189	41.221
56.621	59.971	48.237	45.29	48.307	44.099	44.201	42.583	44.115	91.885	81.231	74.48	80.722	79.921
32.507	38.067	35.936	27.396	34.667	27.444	19.905	27.645	21.896	60.967	55.422	44.468	59.772	38.466
39.247	23.777	21.462	20.246	22.172	26.342	18.858	17.545	17.647	31.979	24.572	31.521	29.975	55.75
62.633	87.247	109.43	84.579	101	91.717	72.179	85.903	71.099	89.116	80.702	79.827	109.54	106.75
77.178	59.551	52.579	50.299	50.409	60.647	46.695	49.038	50.47	69.904	75.899	89.66	69.643	85.21
34.942	37.887	38.113	32.597	38.581	40.685	23.776	44.962	22.873	44.343	47.863	41.129	42.447	40.194
38.357	30.486	32.635	28.856	32.332	36.951	25.405	29.125	20.738	51.456	43.658	43.073	40.198	38.172
37.327	32.806	25.523	22.974	24.063	25.233	22.545	23.94	21.652	61.651	49.919	41.107	45.088	31.247
59.571	36.615	30.006	31.44	30.962	30.65	26.514	29.409	26.552	41.662	50.411	45.978	37.17	33.37
58.893	47.514	41.009	53.733	40.448	51.996	43.361	47.817	35.049	62.275	63.154	63.725	62.804	47.451
59.313	92.131	80.582	79.278	81.61	82.17	63.887	79.469	61.27	116.77	107.07	125.49	118.19	106.77
43.853	59.877	46.553	50.525	50.92	66.81	51.802	43.63	55.408	64.317	64.133	59.663	68.89	56.279
53.523	46.39	32.921	42.05	32.638	38.447	40.91	36.729	38.026	47.242	55.681	49.621	47.736	51.062
56.494	46.39	39.847	42.05	38.826	41.154	40.91	36.729	38.026	66.692	56.425	85.061	68.314	51.062
56.494	47.781	65.153	43.434	58.687	46.504	46.63	38.449	49.56	68.927	62.527	54.131	79.014	55.308
71.646	44.668	49.73	44.965	45.07	48.193	60.514	41.575	58.879	56.964	51.228	57.159	77.92	57.356
80.098	130.97	131.75	121.48	137.3	123.56	122.59	126.82	135.34	106.96	122.3	129.56	115.99	133.78
116.53	98.819	109.22	103.05	105.31	93.765	94.751	106.19	99.285	98.897	89.635	98.053	101.2	105.36
96.594	112.89	109.22	97.401	105.31	96.123	83.737	92.913	87.317	144.64	127.96	123.51	137.03	105.36
115.53	102.27	87.301	86.828	91.812	83.472	92.484	82.157	101.31	138.82	143.48	127.07	129.56	122.1
159.63	105.3	110.15	122.05	108.19	113.54	138.63	117.53	122.51	126.55	121.25	115.74	117.24	119.71
97.498	78.793	56.917	69.31	56.632	73.923	81.429	67.8	91.363	96.868	110.96	107.9	102.24	105.74
102.21	78.793	70.711	64.001	68.057	66.161	76.856	73.025	80.198	115.62	110.96	118.23	99.544	121.84
113.93	119.24	90.258	118.49	93.611	109.29	135.01	104.13	138.58	122.84	126.11	143.27	112.6	129.9
60.325	119.24	90.258	118.49	93.611	109.29	104.03	104.13	98.751	119.42	117.95	112.14	117.81	107.5
118.03	133.05	163.14	126.92	159.77	130.14	111.16	145.32	108.42	109.29	116.89	121.05	131.1	144.82
96.046	85.584	79.993	97.903	82.198	95.237	89.187	91.662	87.072	87.759	87.952	75.728	79.627	66.268
97.091	112.78	121.9	130.39	121.95	124.32	131.04	131.76	134.94	83.546	85.074	82.553	95.504	78.879
172.41	331.88	340.98	290.33	328.55	289.84	250	290.1	232.73	330.02	329.39	314.38	354.61	314.25
195.48	228.85	254.04	215.89	242.22	226.93	192.19	215.14	191.07	225.18	205.89	208.76	259.29	234.73
169.28	205.66	201.51	224.22	205.98	223.82	226.92	220.49	240.87	197.06	200.49	208.76	209.19	199.8
141.04	132.14	121	121.86	130.3	118.01	142.64	130.72	140.27	128.78	130.74	169.67	110.93	192.79
97.26	82.543	88.902	82.749	87.991	79.021	61.888	80.749	53.154	113.72	69.702	63.956	102.59	59.478
146.76	119.82	132.05	137.08	131.07	127.63	114.52	137.76	127.28	154.17	127.66	113.46	182.4	85.907
127.5	121.06	103.35	135.98	108.93	136.22	147.15	114.05	139.89	126.51	123.18	118.63	124.05	136.96
179.63	204.54	220.43	201.68	220.08	194.56	162.82	208.78	146.17	176.28	174.18	160.82	200.39	154.89
141.84	160.83	181.63	187.1	181.76	177.94	166.36	189.61	168.75	148.8	156.45	149.65	142.78	142.94
154.59	138.66	126.77	148.64	126.22	141.5	151.74	145.34	139.07	139.56	139.79	130.67	140.18	122.23
69.823	63.746	58.385	68	57.513	64.419	71.605	71.137	81.985	104.28	60.65	71.863	80.734	69.343
70.601	126.1	89.807	121.91	97.685	119.86	108.36	108	107.03	158.88	165.29	170.2	149.88	150.34
129.93	157.6	177.07	132.29	169.16	130.54	136.08	126.19	131.39	158.88	165.78	192.87	174.59	201.21
142.36	144.85	142.17	156.2	137.38	158.41	155.96	146.51	153.16	101.05	121.12	131.65	106.13	136.11
79.748	78.052	48.288	79.971	59.712	71.962	102.96	74.992	97.5	68.563	84.849	103.32	47.481	110.74
95.919	78.052	68.889	79.971	67.847	75.903	102.96	74.992	97.5	68.563	88.919	109.83	67.06	110.74
50.859	58.699	47.907	70.032	50.782	71.106	89.672	60.434	87.362	57.645	65.422	65.249	59.947	56.375
77.925	80.045	65.395	86.425	70.3	76.92	78.174	88.541	64.89	74.391	78.252	81.381	84.186	84.219
77.064	84.798	91.322	86.425	91.97	86.523	78.174	88.541	68.941	75.883	92.531	97.612	106.44	98.454
77.064	140.62	166.17	111.82	148.47	121.21	101.86	120	96.026	75.883	92.531	97.612	109.74	107.27
105.36	55.649	60.098	50.551	57.124	46.65	44.095	51.768	58.118	95.59	81.625	79.508	96.206	104.69
109.24	72.915	80.8	58.902	73.249	57.774	46.039	67.02	46.667	77.264	79.337	72.326	74.966	77.752
108.1	59.172	89.375	64.802	85.155	67.428	61.29	66.071	67.317	50.237	68.632	66.015	53.563	59.349
159.71	84.237	106.77	78.1	100.71	79.899	50.686	83.81	51.765	111.54	106.83	94.735	124.87	57.142
106.59	71.917	75.905	78.1	70.771	79.899	70.837	88.229	69.935	68.936	65.594	70.922	68.408	72.081
171.8	140.09	123.34	124.23	132.05	144.12	155.04	144.48	173.25	77.178	99.663	114.41	88.183	120.7
171.8	179.62	217.87	195.39	210.21	203.97	170.3	196.03	174.19	172.81	163.88	143.2	169.57	175.85
119.09	136.25	129.47	126.01	138.06	134.21	155.56	126.15	180.12	85.051	105.32	180.99	93.999	163.79
119.38	136.25	129.47	126.01	138.06	140.94	148.08	129.13	136.58	88.235	104	126.72	93.999	152.48
65.508	60.537	52.111	60.038	54.09	58.836	57.465	57.988	64.921	49.836	53.601	61.198	44.642	57.107
58.066	26.947	26.424	18.088	24.239	20.444	13.666	27.355	12.909	66.918	48.2	40.543	49.583	49.043
49.862	28.261	25.086	20.976	24.15	20.078	22.046	21.427	18.852	40.213	43.789	38.222	31.671	34.928
66.899	36.644	30.895	29.646	31.552	32.429	30.44	31.584	25.688	54.562	54.144	45.874	45.241	49.857
61.126	36.433	29.711	25.316	30.619	29.856	23.469	26.467	23.09	55.169	49.694	47.144	46.239	47.109
57.246	42.768	36.101	33.375	35.487	31.812	28.645	35.185	28.856	68.545	51.816	47.748	48.286	39.821
101.82	34.384	33.041	26.206	31.412	31.952	24.319	29.013	27.56	64.834	46.241	43.465	49.236	37.908
74.434	34.384	33.727	26.815	31.412	34.905	27.89	26.803	35.731	57.567	47.514	40.055	67.661	37.908
45.819	63.01	54.799	51.721	50.47	53.111	40.54	48.585	44.631	110.42	79.025	66.043	107.55	64.65
54.359	55.272	50.347	46.906	50.839	43.088	37.976	43.314	29.871	81.345	67.62	61.43	101	49.962
55.108	97.78	82.109	100.19	89.974	110.49	113.23	96.018	104.5	118.01	104.62	113.89	113.75	158.92
84.023	68.084	60.485	68.338	68.734	72.419	68.883	66.214	69.469	102.78	83.388	67.741	100.28	66.814
98.505	46.498	50.823	63.856	51.138	59.333	72.895	57.651	77.494	49.624	57.105	57.811	37.73	66.814
73.091	88.356	64.062	67.461	72.033	71.373	72.895	73.469	133.51	52.6	69.929	72.379	56.538	61.253
73.091	100.75	109.96	93.532	103.24	96.491	80.128	89.488	110.69	96.48	96.339	108.38	86.853	92.935
148.9	126.36	130.17	119.67	122.02	117.6	103.08	120.1	126.39	153.64	146.28	139.27	156.66	152.57
88.068	88.539	89.371	94.933	95.416	90.18	108.3	103.34	155.45	121.26	108.98	106.13	113.56	102.63
115.08	197.92	176	164.75	171.62	167.29	179.03	168.17	167.46	193.65	216.4	212.02	196.27	220.7
130.58	185.27	170.17	221.09	175.37	185.09	185.45	182.55	174.33	154.44	172.63	155.64	191.19	157.29
129.87	91.872	62.751	99.774	64.565	93.902	119.55	86.653	140.32	100.34	114.23	107.53	100.53	110.13
125.4	83.757	62.751	83.537	64.565	71.626	73.026	76.396	76.062	80.444	79.708	86.011	88.321	114.24
84.126	116.47	101.56	130.06	116.65	121.88	147.51	129.6	163.97	103.95	127.92	118.47	88.688	97.067
52.756	48.174	44.3	52.31	44.938	49.798	60.489	48.084	67.222	69.636	54.818	48.018	59.123	55.111
79.214	57.481	69.573	68.821	71.334	71.176	70.205	78.786	67.222	54.106	59.146	55.003	54.125	49.778
63.206	37.691	31.929	34.261	29.544	26.424	35.752	39.088	43.017	40.4	39.336	48.67	26.132	44.477
91.17	69.454	74.892	61.677	73.07	70.205	55.557	63.688	48.563	69.709	77.096	76.441	76.298	64.925
97.11	127.46	157.24	152.29	152.78	159.49	134.26	147.45	119.72	87.727	101.09	93.6	88.027	76.444
151.36	231.37	245.38	211.86	237.49	236.26	191.97	219.21	201	211.29	201.15	187.74	235.77	222.44
151.36	240.59	224.48	202.03	225.03	212.67	208.79	219.26	207.51	236.05	257.52	278.8	269.16	323.54
131.52	190.7	175.52	161.63	180.54	170.31	178.26	170.04	168.94	128.53	146.04	176.2	147.42	188.18
107.38	136.13	128.3	132.1	126.93	127.95	121.72	135.64	107.27	171.8	146.9	121.09	181.24	121.74
50.88	109.3	104.96	116.76	104.33	122.7	121.72	115.32	114.95	76.697	107.94	101.73	61.893	80.8
102.9	109.3	109.65	164.14	131.22	147.92	116.98	146.67	120.67	85.166	74.967	83.18	63.65	74.11
194.01	218.94	202.62	201.14	203.99	202.99	174.7	201.64	176.1	207	219.77	220.62	222.11	251.4
150.03	209.73	257.46	226.65	260.79	230.07	214.8	240.34	218.92	132.9	132.85	154.95	142.36	168.54
177.36	233.8	253.84	208.33	238.53	223.48	193.15	216.74	187.39	207.43	231.53	227.71	244.05	245.21
112.25	196.04	215.02	220.9	217.4	204.87	199.3	223.45	201.2	108.39	134.57	155.7	112.02	179.1
74.945	126.12	129.7	146.76	128.43	130.85	150.86	133.58	147.37	108.39	115	113.21	112.02	124.98
106.67	91.007	90.352	82.304	95.758	86.67	101.97	98.298	109	95.872	94.18	97.048	81.534	102.41
80.208	60.357	74.402	71.793	70.535	68.884	67.589	72.13	66.754	57.619	53.437	61.287	49.356	60.583
46.931	72.015	87.13	62.106	81.818	56.447	64.818	65.912	82.398	72.776	75.784	73.65	80.802	70.217
75.456	49.581	68.288	49.164	61.718	48.357	40.635	47.966	35.9	62.86	51.107	56.57	50.361	61.323
58.553	28.708	22.346	16.885	20.663	22.076	17.302	17.076	20.827	41.03	33.524	34.635	41.69	54.215
51.288	19.807	13.508	11.275	10.521	16.867	9.2535	9.5851	12.464	54.164	42.177	42.369	37.548	56.048
33.326	11.054	12.506	7.5991	12.196	9.2342	7.98	11.039	9.6515	19.774	18.944	15.61	20.624	17.902
47.419	22.443	28.882	22.11	27.75	27.348	31.063	20.978	25.973	23.068	21.592	22.313	21.571	23.979
25.773	4.4062	5.446	5.3652	5.3922	4.095	4.4246	3.7055	4.383	5.9877	6.9986	6.7053	4.328	7.5995
28.807	12.63	11.657	8.6849	10.347	10.572	8.6058	9.0092	10.931	16.684	17.015	15.894	12.972	18.249
28.187	9.6005	9.6812	6.5013	9.2558	8.0705	6.6346	6.6149	9.4918	12.218	17.753	17.436	8.8653	25.226
29.852	8.3084	9.353	6.5013	9.0117	7.1997	5.7549	6.6149	7.0839	7.2473	8.1944	7.8455	7.0805	10.728
14.192	8.2835	8.2371	9.4601	8.3252	8.264	6.6501	9.0046	7.2719	9.8005	11.363	12.364	8.0039	11.459
29.391	14.91	12.93	12.344	12.489	10.027	11.812	10.596	14.524	15.585	16.199	41.218	14.032	18.626
34.187	8.9751	9.5785	8.4254	9.3818	9.6701	8.3958	8.589	7.9924	10.233	11.896	13.713	12.38	12.068
24.602	7.3493	5.2239	6.5692	5.5242	7.5033	6.7996	5.2774	7.7818	10.233	9.788	10.521	6.7262	14.979
13.18	8.3322	3.6573	6.6874	4.2621	6.2469	6.0954	6.2445	5.6178	13.124	15.374	12.942	8.5117	12.641
21.747	11.253	11.094	9.7496	9.426	11.359	10.078	8.3037	10.019	13.391	15.983	14.951	9.7386	15.46
21.747	10.807	12.013	9.7161	9.426	11.008	8.9177	8.3037	9.9374	12.463	12.363	13.517	8.1167	13.224
23.024	12.664	8.6761	8.7659	8.0429	8.8922	7.7518	8.6541	6.2876	33.545	24.113	20.309	21.537	17.145
16.719	12.271	9.323	10.093	11.55	9.4504	8.2655	8.9884	9.9533	15.922	16.464	15.153	12.057	18.872
29.073	17.237	19.897	18.081	17.781	17.489	15.751	15.653	14.537	17.241	18.463	14.522	16.465	17.487
33.051	23.719	21.213	23.333	25.459	25.587	20.632	20.771	18.628	28.971	24.583	26.897	29.779	20.089
41.029	19.883	12.397	16.666	13.74	18.104	15.921	15.201	15.663	20.598	30.819	23.656	18.581	25.376
25.204	19.883	15.65	16.42	15.963	18.104	15.921	16.009	15.663	20.598	30.087	31.379	18.581	25.376
34.282	22.511	14.911	16.463	14.741	23.048	18.069	15.645	16.588	36.713	36.957	31.197	29.215	28.737
40.023	30.798	24.293	27.654	24.957	30.688	32.134	25.095	28.716	39.865	43.395	43.786	29.215	44.662
66.209	55.25	46.148	46.47	45.012	48.442	41.692	42.562	33.83	55.093	71.389	67.05	51.886	62.56
85.1	38.761	19.274	41.536	21.122	37.171	47.373	33.374	38.331	53.468	55.475	57.17	39.113	43.011
30.59	31.45	28.059	29.805	39.705	36.059	37.955	26.704	41.166	26.996	30.077	40.171	19.151	37.632
66.506	67.305	54.879	62.789	55.646	68.115	79.533	55.907	82.685	43.233	55.106	73.794	45.273	98.524
81.976	37.417	28.856	36.133	29.414	34.951	33.299	37.056	31.041	36.026	42.31	40.615	33.227	34.542
79.051	51.42	36.82	40.749	48.669	43.197	42.178	37.056	39.556	86.613	75.587	72.107	65.338	63.335
44.581	42.076	35.547	38.311	39.303	42.461	41.582	34.763	39.556	43.882	55.738	56.476	41.731	63.083
49.931	57.629	61.679	53.635	60.018	52.781	48.188	61.14	47.055	57.066	55.738	57.833	64.401	56.707
75.4	22.569	25.762	25.453	22.576	24.485	30.343	20.448	32.067	28.453	33.512	38.369	27.762	40.291
79.388	58.791	75.763	55.999	69.37	63.03	51.909	54.941	55.239	45.999	58.236	65.025	38.941	67.064
39.615	41.194	44.148	37.796	40.943	37.58	39.53	36.974	34.874	45.999	43.84	42.008	38.941	41.835
47.21	44.187	42.163	40.819	42.794	48.184	33.372	36.386	36.055	47.628	51.906	53.393	43.087	44.356
114.49	25.999	29.835	27.515	29.543	44.401	20.928	22.46	22.271	29.384	31.665	29.623	31.964	30.653
67.217	53.563	44.223	49.822	44.203	40.733	45.058	49.248	39.288	67.255	69.777	83.456	65.533	92.679
47.506	58.502	56.498	54.779	52.883	58.005	48.888	58.387	52.572	67.255	69.777	83.456	65.533	92.679
68.114	50.144	39.293	52.502	42.065	47.091	46.184	49.109	43.261	55.343	58.111	59.351	45.564	60.458
114.34	92.097	95.232	94.413	91.596	101.15	85.449	89.521	100.65	79.953	83.118	89.945	78.228	99.124
88.254	115.09	111.55	124.12	107.92	115.74	111.73	112.54	121.74	89.976	101.73	129.11	86.089	136.53
101.55	82.746	86.904	82.847	78.613	78.989	67.368	70.42	72.295	122.08	112.69	91.481	130.41	102.62
73.525	82.958	62.62	78.09	69.674	83.568	96.557	78.732	94.877	80.366	85.076	88.945	63.097	79.42
90.668	49.019	52.772	57.261	52.771	64.811	57.819	52.701	48.858	46.898	54.463	47.79	43.973	53.323
50.33	51.378	59.042	61.893	57.62	59.176	61.85	46.443	58.426	41.047	51.731	57.199	45.938	44.846
63.047	120.84	121.82	125.63	116.77	137.83	130.52	122.42	132.46	97.82	104.07	100.11	102.57	91.901
71.995	97.297	108.09	108.67	104.23	104.95	99.269	112.21	93.651	91.32	104.82	111.13	88.157	81.857
97.491	78.239	70.037	70.366	66.019	75.044	85.468	67.339	69.157	75.998	79.368	95.654	60.041	67.154
70.831	74.769	87.99	105.65	85.931	100.52	107.98	102.43	107.78	50.422	53.538	52.816	52.284	53.985
93.085	57.271	66.388	70.627	64.497	77.94	79.124	69.641	79.418	58.631	56.42	75.428	56.571	81.318
82.921	83.117	99.327	87.806	97.349	84.787	89.681	85.505	95.842	77.622	74.656	78.373	67.94	82.453
109.52	68.044	49.522	67.175	51.425	69.054	90.23	57.172	99.658	103.89	88.8	83.21	72.613	114.8
70.062	70.732	74.607	50.759	70.187	41.853	41.312	58.182	50.291	109.54	90.057	84.032	112.8	126.47
98.891	109.24	108.44	106.52	103.8	105	125.99	110.35	132.13	99.205	97.527	90.361	118.4	93.658
55.13	113.02	106.17	92.329	109.59	86.52	94.394	87.547	94.59	113.48	123.81	142.72	100.98	143.38
78.3	71.703	78.607	66.113	74.87	75.258	65.92	63.358	68.586	65.016	80.467	80.799	75.177	92.827
71.235	65.67	71.731	76.424	70.078	72.545	68.331	77.78	59.045	53.089	61.95	73.999	59.841	53.758
71.196	48.427	43.705	46.813	46.521	64.364	52.498	60.195	54.874	75.515	71.877	64.181	56.833	53.758
101.05	110.27	94.123	88.626	89.569	101.5	84.797	85.851	76.259	148.35	133.51	130.39	135.43	129.48
73.94	50.057	43.043	36.254	41.565	43.611	42.203	52.283	38.015	61.263	56.864	64.569	68.992	48.011
144.62	75.835	71.466	82.461	69.636	91.165	118.29	66.885	101.68	61.263	56.864	93.131	68.992	81.766
90.068	67.276	61.725	82.077	64.602	78.252	101.58	78.722	98.341	56.689	59.632	73.341	48.34	99.15
73.431	99.974	109.19	115.12	112.4	143.19	121.45	100.59	112.04	70.296	76.046	88.451	62.825	94.008
100.51	98.708	88.549	86.127	89.607	89.169	99.429	92.908	92.254	112.67	110.31	110.74	102.12	98.133
141.62	74.187	83.762	91.871	85.15	94.761	109.39	104.94	103.07	69.033	55.659	62.397	67.527	80.002
141.62	69.585	69.049	91.871	73.871	94.761	109.39	104.44	110.1	70.269	56.079	72.024	75.22	84.374
192.26	106.96	82.845	94.642	84.638	98.731	127.81	87.862	128.84	121.15	111.94	109.28	113.17	121.93
86.826	49.785	62.745	45.201	50.605	45.658	54.694	44.104	56.434	69.559	51.652	57.277	67.231	56.479
97.206	91.704	89.382	75.97	86.068	81.745	75.417	79.743	78.161	76.438	80.293	79.37	74.867	79.78
96.285	52.685	52.817	64.282	52.584	64.626	72.425	57.788	73.258	69.392	64.662	62.865	68.268	52.058
64.523	74.676	61.896	72.904	66.944	87.373	84.122	69.756	82.99	69.392	71.995	74.363	63.284	78.544
138.46	127.69	110.74	137.36	108.75	132.92	137.07	122.74	133.18	74.312	98.646	106.53	86.118	122.49
88.895	64.862	56.148	90.743	54.135	84.054	112.11	90.363	111.48	66.336	65.957	60.82	52.295	74.926
90.768	106.05	98.61	105.91	95.362	93.732	120.06	101.47	116.73	103.52	115.02	117.44	103.81	130.65
122.28	143.34	133.57	147.98	131	150.99	168.17	159.25	165.58	127.13	122.72	125.78	133.9	154.87
139.78	96.948	85.179	99.702	91.132	94.815	109.33	103.48	112.8	88.325	102.63	96.328	82.751	115.29
147.68	108.07	108.51	128.2	109.37	113.52	133.68	130.07	132.24	114.81	106.48	97.306	130.28	93.017
94.113	73.246	73.831	69.768	68.939	71.72	88.649	64.046	88.884	77.432	74.581	73.532	84.229	82.255
105.23	113.56	76.36	108.27	81.009	113.49	106.91	104.8	98.987	101.79	98.001	96.618	97.731	117.7
70.231	43.212	39.403	31.649	40.691	34.738	40.284	31.036	42.183	41.94	42.531	40.569	37.486	45.573
143.51	85.08	78.341	91.355	80.963	81.062	84.498	87.773	84.828	109.38	107.32	104.22	94.39	95.501
63.251	51.475	49.571	50.661	51.097	57.962	69.897	53.287	73.652	56.732	71.659	69.285	47.709	75.003
56.597	25.887	23.129	17.469	20.555	19.423	33.812	20.307	36.579	25.046	30.281	35.88	23.364	102.59
60.948	19.771	14.543	12.428	13.27	19.423	15.749	12.578	23.677	28.604	30.281	35.211	20.167	82.032
49.594	21.99	14.028	16.776	14.556	20.431	16.487	17.579	20.374	35.75	27.155	29.221	30.035	65.806
44.401	28.576	24.306	21.649	24.962	17.38	15.216	20.41	14.787	70.301	56.853	38.887	56.532	39.241
42.562	24.561	12.756	14.855	13.103	15.209	12.873	14.481	14.34	74.472	57.956	38.887	56.532	44.324
45.813	43.546	29.441	30.069	29.438	30.775	24.018	31.886	24.04	96.461	66.642	60.629	84.018	63.684
58.492	30.419	30.566	24.642	28.205	32.833	28.191	28.061	28.801	72.347	50.015	36.753	69.05	57.09
84.963	33.622	29.675	24.052	29.903	29.238	32.628	25.473	26.356	56.669	56.291	54.806	39.109	46.29
65.725	38.249	34.733	31.327	35.053	34.964	36.965	30.733	33.429	86.416	69.493	60.607	49.599	52.812
54.94	98.789	92.443	86.921	91.752	84.655	78.669	86.606	78.549	118.71	101.37	97.447	122.14	129.72
71.95	98.749	73.453	90.658	81.586	84.655	132.64	86.606	142.27	78.291	101.37	109.45	71.019	129.72
75.555	98.749	84.471	96.578	81.586	94.483	132.64	93.113	147.54	104.34	81.615	94.422	107.21	106.64
46.33	56.158	66.463	46.628	61.378	51.624	40.123	52.512	40.811	79.927	64.165	57.234	79.805	51.345
105.12	72.65	70.527	52.767	67.488	53.53	55.294	70.069	55.533	128.96	100.71	96.443	126.22	72.219
87.374	110.22	103.29	127.59	105.13	119.84	136.02	116.39	140.16	83.481	95.113	97.12	85.314	91.132
155.27	126.19	129.65	117.02	127.24	117.38	104.37	117.8	104.82	157.49	139.04	115.82	169.02	123.24
35.288	27.407	19.16	22.617	17.416	19.754	20.216	21.3	21.045	36.676	41.009	33.589	30.612	39.657
29.809	16.32	10.909	12.839	12.201	15.319	19.156	16.314	14.281	15.485	19.045	20.141	29.845	18.1
41.185	46.545	39.57	40.486	41.692	39.601	48.484	35.803	51.718	50.109	58.795	62.269	37.429	55.111
57.715	34.813	22.189	27.871	23.826	24.211	30.311	23.522	34.638	47.103	46.479	48.162	37.645	48.851
65.045	46.63	38.384	39.119	43.363	36.989	49.324	47.221	40.831	70.215	64.184	62.903	57.286	57.993
94.611	67.542	83.306	61.624	77.128	88.989	60.362	76.91	63.378	59.532	74.822	80.54	55.403	74.313
239.4	140.59	153.97	160.26	156.31	155.15	127.71	159.44	124.81	154.88	139.94	140.01	128.47	168.25
137.7	99.056	98.856	99.932	102.56	107.11	86.417	98.678	95.152	71.142	73.043	94.309	76.388	106.39
61.229	82.164	74.777	91.184	80.655	88.385	95.724	89.431	90.148	71.136	65.998	68.982	68.825	43.607
42.176	82.271	72.341	79.976	76.812	84.356	79.679	82.183	77.842	47.45	51.217	74.335	42.758	71.939
80.322	55.852	51.17	45.815	51.911	43.181	51.456	51.522	47.02	71.557	57.746	59.855	65.403	48.438
82.465	55.926	43.32	45.815	43.128	44.13	51.456	36.768	46.824	76.862	71.795	64.008	85.294	57.366
68.925	121.51	119.55	124.69	119.65	114.6	108.47	118.29	116.78	107.03	119.64	113.75	114.67	85.856
76.635	121.51	119.55	115.52	119.65	109.12	108.47	118.29	116.78	115.75	119.64	118.94	133.3	116.22
46.485	77.041	97.43	98.596	95.059	92.814	82.964	86.552	83.656	76.3	72.847	67.92	77.87	59.005
131.27	74.978	78.98	75.995	76.923	78.856	77.62	74.657	79.392	89.344	97.953	96.806	77.87	97.204
110.98	112.84	144.29	137.33	141.57	106.36	92.724	152.58	88.765	131.3	132.7	110.64	146.17	105.12
109.54	152.64	168.15	162.09	170.03	156.98	148.08	186.8	152.6	129.84	118.32	115.18	144.51	134.69
128.5	97.91	93.266	123.59	100.82	112.4	134.13	113.39	133.53	115.97	95.893	89.908	102.21	105.31
68.429	121.85	130.48	141.22	130.46	123.5	113.89	164.39	116.38	120.58	104.79	101.37	133.91	88.805
58.365	24.983	25.989	23.732	26.277	22.768	19.012	42.965	20.763	28.651	31.322	24.517	44.76	26.549
59.14	38.328	41.924	35.575	41.368	33.969	32.381	45.681	36.411	30.718	40.269	35.075	37.127	30.169
69.142	86.962	78.736	83.368	80.105	86.315	81.803	77.657	80.592	81.386	92.228	97.487	81.317	91.212
65.003	54.404	59.631	65.223	63.633	65.622	81.803	62.963	69.463	52.429	48.093	53.652	42.106	66.658
65.638	93.451	83.849	90.933	83.055	96.846	87.927	96.418	89.467	123	97.282	106.63	96.229	117.81
96.14	85.189	78.975	80.427	79.619	89.67	83.094	79.386	80.029	125.95	117.68	110.32	119.16	118.48
92.292	146.12	126.02	163.46	142.61	176.55	157.66	146.81	160.18	70.971	106.28	117.14	86.185	96.227
108.24	105.64	122.48	113.95	122.01	103.78	101.4	119.83	99.713	89.54	105.99	95.999	107.71	87.324
126.65	105.64	70.102	113.95	79.083	103.78	101.4	98.779	99.713	96.5	106.18	96.28	110.06	102.66
76.782	86.277	81.705	84.045	81.277	88.379	85.969	92.367	93.704	89.318	85.47	73.191	80.636	90.786
131.61	116.68	143.03	131.21	135.54	117.21	113.88	121.89	113.26	97.852	99.348	148.12	95.218	103.05
99.321	124.49	143.03	124.8	135.54	125.56	145.02	128.37	144.53	118.61	120.06	123.72	113.58	109.63
58.179	96.912	92.987	102.68	93.329	96.29	100.16	103.46	95.027	86.408	104.02	93.157	84.77	81.704
58.179	89.691	64.07	102.68	70.886	96.29	96.952	103.46	88.573	62.821	83.614	78.419	72.059	62.77
58.543	34.805	48.949	41.02	51.159	42.896	38.895	49.849	38.662	38.717	38.986	80.463	38.248	36.778
59.136	46.497	44.995	62.204	61.482	68.95	73.301	59.75	62.205	57.554	42.514	45.858	45.048	33.086
192.29	98.685	109.63	74.936	99.465	77.114	74.887	75.761	73.314	116.38	104.15	93.817	114.03	111.68
121.91	69.025	66.508	73.785	66.493	66.218	85.667	73.774	80.934	78.299	68.499	61.273	82.735	68.913
59.934	147.09	155.14	152.37	153.09	160.65	140.2	146.28	147.17	96.299	124.72	135.5	107.25	103.3
52.366	19.708	19.767	19.148	21.319	18.179	19.155	19.145	26.404	33.406	27.033	28.474	38.13	37.256
22.523	15.475	8.9209	13.816	12.495	12.812	14.689	13.101	23.67	17.335	19.685	20.414	12.964	24.999
120.03	66.305	99.267	61.336	90.826	71.931	47.835	66.698	44.703	69.32	63.566	50.426	80.67	59.611
35.839	28.132	22.35	22.665	22.163	29.35	23.711	20.16	28.143	42.051	39.253	44.762	29.603	39.794
32.681	23.876	20.345	21.211	19.821	25.988	24.522	20.16	25.457	21.997	35.362	53.871	21.065	33.532
28.25	16.132	17.275	15.082	14.876	15.85	16.075	18.141	17.684	15.312	20.087	18.922	17.725	19.165
44.91	25.381	25.967	21.659	23.56	22.458	24.342	21.505	19.421	34.063	27.845	26.407	33.399	30.742
45.72	27.652	26.56	25.052	26.01	27.952	24.809	24.726	24.382	24.933	35.014	40.07	32.953	48.391
28.218	24.12	17.193	21.185	17.837	19.661	20.017	19.576	22.127	34	30.993	27.632	19.604	27.683
25.44	23.801	21.231	19.405	20.432	21.657	18.853	20.515	17.14	22.513	24.477	24.339	20.622	25.24
27.175	24.252	21.097	21.002	20.503	19.671	17.165	21.094	15.703	24.128	31.908	28.837	21.911	25.083
27.888	30.552	31.54	33.136	30.137	31.313	27.9	31.098	25.657	26.057	35.762	31.748	32.717	25.394
23.363	23.127	23.217	19.88	24.904	27.103	18.793	17.229	16.803	19.169	27.243	22.257	25.023	21.089
20.886	17.507	20.049	16.095	20.531	15.763	13.198	15.803	12.772	34.466	19.458	16.386	21.188	16.211
50.398	29.623	23.442	23.204	22.446	21.061	23.431	22.107	25.883	33.018	42.253	39.348	24.881	32.69
35.911	32.514	26.325	31.588	27.672	26.979	27.569	27.802	24.526	40.284	52.22	42.756	31.152	36.263
53.419	36.671	29.877	31.446	31.33	30.424	25.69	30.595	24.144	75.758	50.129	40.136	49.586	37.208
49.801	36.671	33.153	41.447	34.898	37.439	42.515	36.483	45.654	46.838	38.304	46.334	47.333	70.056
44.478	53.079	46.812	47.965	46.121	42.268	51.106	45.198	45.355	77.3	77.306	65.343	64.065	48.572
71.649	85.119	69.417	70.793	71.228	90.476	73.488	67.928	58.825	84.893	88.41	105.03	71.044	102.76
57.057	79.53	49.676	75.483	52.713	75.566	73.488	70.206	59.391	64.326	74.657	68.489	56.505	69.245
59.407	68.626	57.21	57.163	55.758	55.33	65.58	53.681	59.391	103.79	96.732	84.135	86.5	69.681
59.407	78.872	77.366	96.048	77.196	93.139	108.17	88.246	111.22	92.017	92.536	74.73	88.677	74.688
50.457	135.63	139.39	126.41	136.87	137.51	115.35	131.28	112.05	137.16	136.09	121.94	157.87	121.68
77.057	135.63	139.39	127.47	136.87	128.58	148.45	131.28	143.89	152.11	136.09	121.94	157.87	134.7
53.702	64.442	71.427	80.203	70.133	83.328	81.274	67.553	78.524	50.637	61.21	74.254	48.683	103.35
62.014	79.296	69.059	84.202	69.919	74.492	97.471	74.546	92.555	88.363	109.64	91.269	95.407	92.9
96.787	98.25	86.623	125.61	95.522	110.38	138.79	108.54	156.3	63.451	75.234	81.795	70.923	72.4
99.504	86.713	92.621	66.84	104.48	76.204	68.467	76.084	67.929	86.498	88.003	96.833	76.147	77.751
65.97	66.99	66.699	66.606	63.481	73.434	66.825	72.252	59.215	75.723	88.003	83.487	74.658	69.499
65.97	113.15	113.99	113.82	110.06	115.08	105.04	111.88	91.623	128.89	123.58	133.46	123.25	116.52
145.05	185.52	176.62	165.64	175.23	162.36	175.34	166.42	155.71	189.91	193.86	197.71	184.12	221.9
100.56	108.82	113.73	79.59	106.42	73.097	97.273	81.215	84.431	136.76	136.72	170.03	128.83	129.72
64.264	52.721	60.965	49.797	55.042	52.083	52.013	49.631	58.081	66.368	62.692	71.519	50.662	79.204
100.19	132.95	199.82	142.13	188.36	150.43	120.61	155.78	115.53	127.94	114.27	102.65	128.7	91.916
107.53	155.36	170.86	173.97	167.29	169.71	182.18	170.76	180.31	134.19	115.29	119.48	132.94	114.17
59.834	52.9	54.147	50.137	54.252	67.035	59.72	54.02	55.322	70.576	75.455	78.35	59.491	68.428
61.085	101.71	90.752	121.36	96.363	122.33	131.59	109.36	121.94	81.607	91.762	84.609	71.227	90.224
52.054	111.65	113.31	137.31	108.63	135.71	137.85	118.29	142.59	53.897	83.928	98.81	62.476	86.679
51.19	153.47	163.72	144.35	156.61	139.79	139.08	139.75	142.69	122.37	145.15	143.14	151.68	124.85
144.62	60.541	53.79	74.451	61.979	80.689	91.75	76.74	114.81	79.427	62.096	62.088	73.23	77.338
107.7	102.64	74.536	65.241	72.589	70.32	54.838	75.369	67.471	141.97	121.14	105.84	140.39	147.3
114.42	135.36	135.53	126.42	122.58	138.71	137.82	151.04	161.1	141.97	121.14	123.82	140.39	173.2
114.22	81.77	92.595	92.044	88.186	79.496	77.259	97.351	78.374	88.624	93.991	88.655	92.194	91.544
121.26	118.58	135.85	132.27	127.69	118.86	124.97	124.04	126.28	95.568	101.86	97.821	107.52	99.409
70.806	102.26	121.68	109.57	120.74	103.6	84.249	116.87	79.02	88.976	83.989	88.24	77.938	80.126
75.929	70.023	94.402	63.069	95.724	57.626	37.173	86.101	42.192	73.864	75.385	74.071	72.367	59.397
49.758	44.83	45.571	44.328	43.693	45.822	49.808	50.776	50.339	55.247	61.636	57.269	49.797	55.815
49.536	44.83	52.732	48.797	52.424	45.822	46.973	60.426	44.614	43.05	54.46	53.525	49.797	55.815
69.519	66.246	67.485	54.919	68.995	64.548	56.964	61.15	63.745	80.669	79.219	78.542	71.792	86.93
57.778	27.161	27.928	23.747	29.21	24.4	17.387	23.726	22.846	42.043	40.286	37.721	30.781	31.647
76.72	39.23	42.825	30.465	34.484	31.91	30.838	26.986	30.313	60.638	55.32	65.777	54.056	61.279
61.35	35.395	37.366	26.443	32.508	24.86	22.203	25.366	27.768	52.088	49.937	53.266	43.898	61.279
34.696	66.409	46.069	48.429	46.528	41.899	45.538	46.554	47.899	91.298	77.754	74.677	82.481	90.308
95.242	116.79	115.76	126.63	119.47	117.32	115.81	114.18	117.63	123.53	133.31	111.89	112.2	123.14
71.973	103.13	77.649	90.77	86.324	92.686	116.45	87.583	127.5	84.265	91.818	103.63	72.048	117.2
73.385	68.042	75.043	75.673	72.034	74.69	78.72	74.267	87.661	92.769	85.421	86.111	72.048	86.641
84.926	188.63	133.41	173.97	143.3	168.35	158.13	173.68	148.82	108.31	143.73	167.51	107.14	148.67
122.11	178.97	137.75	182.87	151.57	175.89	182.95	176.14	184.31	95.785	136.57	172.9	87.59	161.9
45.204	98.999	77.212	79.717	76.187	75.185	79.761	76.547	85.054	95.785	119.42	114.06	87.59	149.18
54.467	89.525	91.271	100.22	90.473	82.814	99.494	124.22	111.34	60.836	70.143	73.354	48.671	74.404
83.5	129.69	137.29	131.61	138.55	127.04	120.74	138.45	124.74	118.5	120.28	104.82	153.76	96.06
96.35	100.94	107.11	109.81	100.34	109.9	112.63	111.5	105.19	72.791	86.28	91.308	73.483	90.506
73.87	105.59	104.55	116.96	101.92	109.9	112.63	122.27	105.19	93.671	103.12	113.06	78.51	108.78
78.529	77.096	77.432	83.569	76.295	87.459	73.54	83.488	69.334	72.956	79.899	77.379	76.269	80.106
44.349	57.814	54.209	65.621	54.475	76.59	78.364	71.24	69.725	50.715	54.735	59.084	51.845	52.854
60.112	66.027	58.321	65.621	59.565	65.764	74.529	71.24	69.725	54.122	72.146	67.913	51.845	58.25
77.451	81.851	102.33	92.615	97.326	87.061	77.39	102.08	71.925	88.842	91.958	101.15	88.939	86.868
128.43	127.38	117.62	123.48	120.24	117.86	110.01	127.07	109.3	140.19	124.2	122.44	135.39	131.11
79.567	111.5	132.04	108.85	123.21	106.69	99.176	121.86	84.463	130.53	117.98	106.57	135.39	120.13
137.1	158.29	163.49	202.06	174.97	193.24	211.63	190.76	199.74	93.407	106.04	110.76	95.093	111.39
81.234	107.02	109.03	127.37	111.12	121.82	113.66	129.38	90.265	78.639	91.664	95.692	83.548	78.809
71.109	39.898	37.37	45.151	36.112	41.654	51.16	39.931	70.272	72.752	65.663	56.242	67.882	67.73
67.627	75.258	72.864	75.5	70.02	74.272	86.872	73.082	85.905	59.913	65.663	56.242	59.88	42.303
42.009	25.593	27.173	20.762	25.724	19.553	22.99	22.124	34.799	55.614	31.467	41.489	45.968	41.161
108.05	29.758	26.071	25.65	25.724	26.912	32.45	30.863	36.973	36.498	38.861	42.946	31.473	41.161
69.119	33.519	34.039	25.02	33.593	27.569	24.529	30.95	31.083	33.303	38.861	37.779	21.012	46.708
32.989	12.883	13.026	8.0537	11.304	14.851	7.1417	10.39	9.6088	19.544	15.9	15.93	13.12	28.908
37.819	9.1952	10.015	7.0815	8.6538	6.7839	7.4501	6.7481	4.5721	20.555	22.326	14.686	17.898	11.796
41.947	8.5584	7.1317	5.4456	6.2482	7.9529	5.7361	5.3249	6.9106	15.96	20.723	14.686	9.7278	13.005
17.385	8.768	7.0321	5.4456	6.2482	7.9529	6.8092	6.3977	7.3133	12.413	11.564	27.811	6.3164	12.18
29.46	8.2488	7.3652	4.9267	6.8356	5.8241	7.205	5.8595	6.0448	11.69	14.203	29.499	9.8681	11.53
52.409	17.653	11.589	14.729	11.842	13.469	15.922	13.545	13.432	27.333	31.689	29.499	18.985	23.051
15.705	8.614	8.9395	7.5631	9.1661	11.058	6.3981	7.0055	5.8557	15.262	13.293	11.447	10.63	17.636
12.995	10.799	13.314	11.01	13.242	12.846	6.292	10.646	7.3749	25.186	16.968	22.335	11.175	19.992
18.671	8.8456	9.4685	6.4387	8.7961	6.0841	5.7943	7.0812	6.2724	14.16	11.855	16.772	8.4574	13.516
35.014	10.593	14.805	10.67	14.667	15.259	10.673	9.7476	10.832	10.876	11.764	9.9794	13.155	11.146
33.633	12.792	12.244	10.491	12.518	12.942	10.96	9.0787	11.25	18.811	21.244	17.03	15.487	15.107
33.925	8.6575	10.03	7.1811	9.4855	7.4339	6.2151	7.9186	6.0197	15.375	10.091	9.7322	12.239	10.615
28.734	9.3917	10.092	10.29	9.7	14.473	9.1469	8.0541	8.7525	15.375	13.398	11.977	10.4	10.615
22.595	9.3917	10.092	10.29	9.7	11.167	8.845	8.9312	8.7525	10.923	13.854	14.473	11.399	13.736
16.056	24.077	23.253	21.653	24.546	21.997	23.07	20.837	18.55	21.484	20.535	19.912	17.376	18.667
29.74	15	17.765	15.256	15.245	14.028	18.806	14.296	16.98	16.786	15.572	15.634	13.38	13.673
15.603	10.282	10.276	9.0292	9.2761	17.315	10.052	8.5851	10.081	15.807	15.929	13.507	12.593	13.673
38.887	25.826	16.221	17.92	18.307	19.31	19.985	16.883	24.215	31.174	32.528	36.964	21.481	39.216
36.35	19.581	17.236	16.5	16.622	18.794	13.471	14.242	13.655	31.95	31.079	31.259	22.787	34.04
22.156	19.581	14.84	14.73	14.427	16.008	13.471	13.854	13.655	37.328	32.9	31.259	18.529	34.04
19.315	17.888	15.377	20.429	16.82	19.61	11.811	17.872	12.099	19.409	20.671	21.658	20.786	22.922
26.439	15.815	12.134	10.512	14.46	11.427	9.7682	11.75	8.8088	29.178	23.18	20.747	22.368	22.922
14.983	10.145	8.5757	9.8419	8.5481	9.288	5.8657	8.4154	6.2882	25.391	17.328	13.194	17.673	14.487
13.517	9.1513	6.3612	7.4173	7.3691	11.498	10.033	6.8584	6.9967	11.79	12.671	14.243	10.107	12.654
23.549	17.503	14.89	14.109	15.066	18.49	14.405	13.985	15.016	22.377	24.634	25.974	16.998	32.297
33.592	7.3909	8.9415	7.4795	8.1973	8.6933	6.8089	7.019	9.3851	9.8268	10.758	20.531	6.5812	12.575
13.298	22.533	18.812	17.407	20.018	19.469	18.413	15.623	20.645	17.966	18.927	37.993	12.237	25.966
23.045	19.935	14.228	15.844	15.739	22.398	13.35	14.501	12.264	26.222	31.559	30.801	19.053	23.344
21.882	14.795	16.214	12.768	14.215	14.356	11.185	12.061	10.412	17.81	21.276	19.234	13.467	20.434
11.662	12.775	12.124	12.768	12.844	14.801	11.032	12.061	10.412	19.326	16.93	15.349	19.132	20.634
33.752	10.109	12.124	8.5447	12.343	11.742	7.0869	10.552	7.9204	7.1662	6.9222	6.6224	7.5675	8.6234
31.297	5.4471	4.9153	3.4579	4.5829	4.6044	3.5343	3.875	3.7056	12.372	12.006	11.044	11.674	10.08
28.879	11.162	10.641	6.5265	9.2353	10.566	6.4524	6.8563	8.3664	12.295	10.766	12.312	10.504	17.507
16.657	7.5278	7.1934	6.6467	6.9464	10.395	5.5316	7.2594	6.4413	9.6371	10.29	10.834	6.9139	9.7244
25.371	12.484	9.3763	9.2365	9.1366	10.452	9.1937	8.2448	9.8982	15.398	16.461	15.988	12.286	15.577
25.429	12.484	13.574	9.9164	13.336	12.765	9.1937	11.522	9.7163	14.262	14.684	16.826	10.234	16.37
27.625	6.2231	7.4766	4.8413	6.4925	6.3218	5.9174	5.0276	4.8149	10.896	10.881	9.6149	8.1588	11.153
24.059	8.7462	6.4354	8.7711	6.9305	11.517	7.1961	7.2871	6.8474	8.7412	10.932	11.653	7.0072	10.944
18.533	20.054	18.741	17.237	18.912	18.838	13.554	15.991	14.288	21.819	24.969	25.379	17.43	22.166
25.246	20.405	19.862	17.738	18.912	20.399	15.441	15.991	14.983	25.586	25.082	26.632	17.43	20.392
14.638	17.371	21.728	17.787	19.083	14.767	14.231	15.328	12.236	20.33	23.84	17.456	16.057	15.926
25.035	20.479	13.142	16.2	14.224	17.692	13.442	15.317	11.649	27.892	31.657	30.709	21.329	29.125
19.49	17.743	15.015	12.889	15.694	13.321	9.9371	12.471	7.8621	47.367	25.532	18.24	35.766	19.193
25.817	17.743	14.217	12.889	15.207	13.321	10.956	13.692	11.948	34.965	28.092	28.864	18.82	23.37
41.626	23.249	12.837	15.761	15.508	20.17	16.745	15.76	16.429	37.056	41.118	40.035	26.79	48.847
52.505	25.469	20.298	18.883	20.229	23.284	17.486	21.056	16.429	38.769	41.221	40.035	28.843	48.847
82.969	39.046	21.035	26.428	23.087	28.782	25.566	22.929	25.041	80.741	87.919	67.453	56.847	63.636
67.335	49.898	47.093	36.201	47.322	44.904	43.311	35.124	43.244	79.909	71.285	65.261	59.581	79.699
49.447	38.817	29.395	32.704	27.34	26.838	51.929	30.303	39.195	76.85	71.285	65.261	51.175	86.516
46.572	35.615	32.166	32.704	29.263	26.838	51.929	30.303	42.931	44.389	42.19	51.498	42.124	48.957
30.79	22.773	20.263	20.121	21.356	22.818	23.113	19.72	29.572	31.876	24.197	26.612	22.41	30.246
29.85	26.761	43.202	33.752	40.511	38.231	27.96	37.513	32.802	75.451	46.516	40.078	54.648	69.987
36.616	28.69	20.343	25.306	22.937	26.196	22.577	21.975	19.941	55.449	46.009	37.26	38.616	48.267
42.761	64.52	49.211	55.166	53.404	57.369	41.352	51.839	36.368	123.38	112.04	83.155	89.183	61.563
53.963	49.529	35.688	37.878	37.791	36.794	28.067	36.651	24.783	85.112	88.695	67.457	73.312	56.839
30.388	54.299	44.544	43.172	43.704	38.777	37.949	40.06	34.023	83.102	88.869	76.394	63.845	61.455
28.91	26.064	21.681	20.294	21.058	23.143	19.567	20.989	21.495	38.05	30.697	40.376	36.503	24.69
28.91	16.038	18.092	15.291	16.109	22.127	14.096	14.988	13.936	33.338	27.068	19.963	30.96	24.054
55.795	22.253	18.092	20.911	17.312	26.234	29.006	17.357	26.454	59.663	47.251	31.103	41.077	40.232
100.79	84.808	87.143	76.859	81.258	94.953	79.914	79.299	81.787	71.504	80.834	89.725	64.757	89.065
86.782	124.59	153.85	107.7	142.73	118.42	85.381	119.59	99.145	97.285	106.83	107.04	121.65	120.25
86.782	66.758	44.246	51.041	49.445	51.302	62.077	51.86	66.349	101.35	84.609	71.09	85.12	99.289
94.278	57.501	57.815	53.446	56.713	54.048	62.077	51.777	59.269	32.174	46.042	52.247	41.483	49.277
96.371	150.52	139.03	177.42	153.3	180.93	170.23	166.93	175.09	68.065	100.81	106.46	79.665	121.9
138.29	76.789	102.32	94.191	96.719	97.939	77.767	102.56	78.143	90.993	90.954	81.949	86.305	81.421
84.431	94.217	114.97	91.402	108.13	97.939	71.358	102.48	62.853	103.32	93.594	115.4	88.79	81.193
104.38	101.1	102.51	95.393	95.619	91.11	97.378	94.046	98.495	100.24	101.71	114.76	105.13	108.16
97.249	114.03	109.62	115.37	109.61	113.47	129.64	124.61	136.88	80.014	87.92	105.12	82.363	108.16
93.015	102.94	109.62	115.37	109.61	112.74	129.64	110.32	136.88	58.931	82.347	91.709	80.563	85.394
122.26	193.92	210.65	187.86	201.07	184.01	176.71	176.1	169.48	198.8	206.47	190.95	161.27	220.03
104.25	154.51	195.07	164.84	185.42	165.59	123.24	204.79	149.2	136.93	125.29	99.444	167.41	110.94
67.905	86.545	98.432	115.09	98.474	104.81	83.541	135.9	95.72	157.52	129.03	76.524	146.55	57.159
77.69	124.82	119.31	113.16	120.38	115.99	104.77	113.52	98.158	124.03	125.93	100.98	121.2	126.32
131.44	153.19	172.85	154.19	173.14	167.26	147.47	177.28	147.36	130.16	139.6	142.69	116.01	152.99
113.08	205.9	180	200.89	193.35	199.68	186.87	199.68	193.23	157	212.05	207.88	136.5	216.13
69.831	62.23	55.149	85.003	61.994	95.077	84.082	85.136	86.403	61.164	62.335	78.211	48.313	50.779
93.026	102.88	92.955	100.97	93.619	98.674	118.54	90.986	105.58	114.39	108.37	86.722	91.212	67.095
54.493	135.04	171.23	174.34	169.03	180.31	160.66	184.2	162.69	56.481	81.45	82.707	117.83	67.784
91.277	135.04	138.21	174.34	144.9	172.99	170.5	184.2	166.89	60.671	86.401	107.58	117.83	130.59
89.649	73.413	61.669	56.596	60.69	51.38	59.216	49.138	55.205	116.76	112.55	90.189	102.72	143.2
28.217	19.731	21.996	27.873	21.387	22.163	17.227	30.794	17.627	22.001	26.157	26.051	38.501	22.564
42.046	86.611	79.367	75.94	83.479	84.774	73.162	79.595	72.692	71.386	90.806	95.188	63.208	117.76
77.46	66.14	76.959	75.035	75.075	97.709	85.895	79.972	101.56	91.708	91.413	83.439	76.575	71.852
77.46	66.359	76.959	85.862	75.075	93.335	111.41	79.972	115.95	47.995	55.513	66.784	48.519	52.886
81.322	56.414	46.045	82.301	46.779	70.754	109.36	64.169	104.72	55.835	66.07	66.616	54.346	49.881
100.46	138	133.52	129.9	129.34	128.17	128.03	127.79	105.05	123.94	141.92	150.07	97.279	121.66
50.621	51.584	40	39.637	42.011	36.437	33.962	39.751	28.818	78.123	58.728	57.51	68.1	59.594
1.63E+05	51.584	43.438	39.637	46.273	36.437	33.962	39.751	32.922	78.123	58.728	57.51	81.136	59.594
3.55E+05	69.012	50.859	55.017	52.132	50.399	45.831	51.753	40.648	101.8	107.13	101.94	81.136	71.487
4.66E+05	63.036	52.757	46.648	53.185	54.828	37.826	46.656	37.55	75.264	92.351	93.124	56.435	74.325
1.50E+05	28.221	20.657	23.74	22.54	21.55	27.631	22.023	21.858	32.107	36.829	37.439	23.309	32.43
14275	17.043	14.405	12.242	14.363	21.55	14.13	12.659	12.261	22.624	22.789	20.857	19.387	25.797
3.04E+05	47.533	34.772	35.164	34.855	35.005	26.337	32.261	22.384	120.65	81.684	63.523	73.951	61.33
1.53E+05	353.82	311.18	271.95	318.07	270.63	227.36	280.18	212.98	415.11	462.24	429.05	344.55	353.05
2.15E+05	218.28	203.95	160.28	206.3	193.24	150.47	170.34	145.4	237.11	292.98	282.94	177.61	200.6
1.22E+05	24.246	15.052	16.63	15.249	16.986	16.029	14.701	15.064	62.786	45.984	38.331	47.925	41.868
2.77E+05	80.497	68.861	59.814	69.675	82.463	61.694	58.727	57.07	104.17	105.81	99.803	86.221	95.885
230.98	31.427	18.189	19.005	18.186	22.745	24.936	22.557	25.208	62.215	51.189	46.239	41.187	50.966
83.24	31.427	18.421	18.967	18.947	15.462	28.919	22.557	24.311	62.215	54.654	56.07	44.001	67.405
49.456	34.583	22.084	25.005	21.83	28.306	21.036	22.187	20.831	84.682	70.418	56.768	55.558	67.364
38.471	18.123	11.672	12.476	10.94	14.095	10.76	12.522	9.7414	38.142	31.176	29.904	23.991	36.337
39.856	24.61	17.232	21.18	17.966	22.993	16.905	20.491	19.697	54.516	35.539	29.904	39.104	36.337
147.34	41.998	30.715	27.635	32.384	33.561	21.536	26.503	18.727	95.158	74.91	50.474	62.878	53.059
79.164	27.411	19.183	16.732	19.013	20.584	13.277	16.951	11.742	75.134	55.29	38.845	47.559	54.639
36.001	18.957	11.529	11.644	11.477	15.122	12.241	11.023	11.742	55.026	39.887	35.923	36.883	42.86
14.33	14.984	11.292	11.05	11.179	11.505	9.4987	11.023	7.945	34.748	25.908	20.221	22.758	13.388
80.419	37.661	32.382	34.733	30.398	25.633	20.063	32.736	21.889	40.075	68.334	50.429	30.603	45.981
25.336	19.556	19.481	15.296	18.723	19.459	14.709	14.473	16.797	22.473	26.263	25.35	18.965	21.138
16.96	8.8663	8.4179	5.6784	8.554	13.506	7.2694	6.6431	6.9303	10.585	15.541	14.134	11.16	8.5354
15.749	11.361	12.251	12.324	12.058	13.506	10.229	9.2944	11.118	12.23	16.553	14.134	12.919	12.361
39.249	37.163	34.342	31.909	32.235	32.758	26.282	31.201	26.542	42.172	50.192	42.742	35.84	40.175
46.613	25.89	25.855	20.422	25.098	22.839	21.797	22.429	21.625	27.672	40.397	36.868	25.058	24.722
37.691	33.654	32.442	26.486	30.667	47.099	25.017	20.924	16.7	47.559	42.301	31.515	31.237	33.399
42.021	38.172	48.273	42.727	48.835	47.099	23.806	38.88	24.945	32.573	28.717	26.201	42.238	35.289
61.193	27.738	30.689	25.088	28.775	37.069	28.014	24.55	21.368	26.749	45.298	28.417	28.757	32.977
11.037	15.757	19.636	18.923	16.703	16.904	13.667	16.868	8.0005	13.195	12.964	21.19	12.945	17.899
26.806	22.377	29.849	20.828	30.527	40.288	14.207	26.474	16.956	14.955	13.564	21.19	19.188	22.595
24.446	32.174	33.324	29.577	34.441	31.631	22.139	30.941	21.959	31.149	38.973	38.034	35.507	32.043
13.516	25.585	23.452	24.016	24.023	23.446	18.716	21.485	18.73	20.396	28.097	32.92	26.146	21.255
19.249	15.125	14.197	15.544	12.992	20.423	10.207	17.839	10.594	17.378	21.57	17.994	16.419	14.141
32.575	55.242	49.96	46.111	49.924	43.877	50.194	43.03	39.565	56.698	64.58	62.217	48.479	52.7
29.513	55.242	53.101	46.111	50.284	51.229	49.99	43.03	41.65	50.593	53.004	59.078	48.479	52.7
21.495	56.938	48.584	49.031	49.561	52.833	40.476	44.284	40.206	62.242	74.467	57.458	66.61	55.787
26.784	52.813	43.187	42.07	44.935	51.456	38.549	40.421	37.046	58.645	69.626	62.399	57.939	49.58
62.405	52.267	43.151	42.082	41.343	49.05	39.132	37.369	36.115	52.934	57.701	70.528	53.825	47.985
45.845	50.978	46.348	41.719	42.473	45.708	37.973	38.14	35.425	49.22	54.163	65.741	51.221	57.544
17.665	27.781	25.789	24.272	26.229	27.717	19.774	23.268	17.027	29.695	40.574	32.342	27.277	21.186
24.208	35.501	32.429	30.845	32.237	27.229	24.849	31.79	22.639	38.339	50.3	45.31	40.008	29.822
67.049	45.52	43.384	50.815	46.827	46.936	44.514	41.75	32.841	53.833	56.281	51.847	47.195	45.259
48.522	22.353	21.737	24.493	21.647	24.379	26.282	23.057	22.085	31.496	29.909	29.014	23.111	27.052
43.445	35.757	29.185	34.925	30.853	31.831	34.971	27.443	29.252	27.675	48.105	43.404	30.353	31.919
45.06	39.217	31.947	35.943	34.617	36.949	41.75	32.182	39.684	35.155	53.449	53.97	30.353	45.037
51.295	27.35	23.467	20.719	23.976	27.991	19.072	22.422	19.092	25.189	37.002	37.746	23.841	35.107
51.295	46.019	39.93	40.571	40.361	44.164	32.721	44.763	29.142	41.726	58.962	62.671	34.375	48.798
55.392	34.677	27.463	28.156	27.904	27.499	30.045	28.849	28.195	37.292	44.549	40.037	42.436	38.049
33.806	31.355	32.83	26.849	31	32.241	23.958	26.491	22.6	33.491	41.6	37.019	34.103	36.805
35.221	31.355	32.83	25.651	31	32.241	20.089	26.491	22.048	33.491	40.327	36.98	34.103	36.805
41.069	27.631	22.25	25.44	22.727	22.904	24.263	18.267	26.274	25.564	35.217	37.824	25.441	29.591
24.234	26.553	22.25	21.223	22.727	22.651	20.542	20.015	20.634	25.677	35.217	38.983	26.732	27.481
39.656	35.977	24.082	34.867	26.653	36.002	37.526	29.731	33.378	34.935	45.435	49.995	30.498	32.278
25.886	26.514	22.524	28.494	23.397	30.096	28.231	29.586	24.737	26.247	27.297	29.51	22.892	28.878
36.759	29.219	26.753	28.494	26.67	30.096	29.208	29.586	29.928	32.505	35.018	38.775	29.927	37.788
36.125	38.645	39.96	38.685	38.453	37.67	31.106	38.914	27.717	36.327	41.364	36.496	34.693	32.37
20.467	22.176	17.595	19.705	18.01	21.833	18.688	18.076	18.777	24.842	38.166	36.496	28.528	24.327
51.397	37.808	38.36	31.358	34.261	34.17	31.213	31.752	33.468	49.94	46.642	46.225	39.992	36.991
24.88	18.843	17.042	15.692	17.643	19.231	13.479	15.926	13.679	19.957	29.078	23.339	19.295	21.434
34.481	31.564	31.668	26.517	29.387	35.838	25.418	28.288	29.712	28.457	35.557	41.135	30.061	31.684
34.56	38.124	33.332	29.387	32.174	33.548	28.347	29.155	26.387	51.296	52.945	58.605	34.872	38.706
37.671	34.702	33.332	29.816	32.174	44.598	28.955	26.796	24.327	32.3	41.397	50.275	34.627	32.13
59.555	52.697	56.582	55.326	58.824	62.649	50.865	53.646	47.613	32.661	55.497	64.196	43.304	36.436
29.02	34.599	37.606	26.218	37.018	35.653	23.214	28.945	24.882	36.362	40.296	44.305	39.78	42.752
39.024	53.79	43.758	41.669	45.727	41.863	36.672	43.247	35.895	55.889	63.748	57.22	51.801	49.449
74.023	57.196	43.758	48.395	46.822	45.298	52.288	44.34	52.75	64.13	75.483	78.769	52.053	79.347
46.001	29.981	37.789	27.791	36.43	42.089	30.174	27.167	36.837	26.89	27.757	38.052	25.499	55.136
86.04	81.881	71.322	88.772	72.192	90.692	89.929	75.488	91.826	49.034	59.922	77.575	42.396	76.489
80.871	107.66	106.42	116.8	105.63	108.71	110.76	100.2	91.826	95.242	111.89	103.5	88.973	91.997
82.572	75.457	61.1	69.372	60.529	68.525	83.642	62.226	80.746	87.533	89.631	90.584	68.95	91.997
56.443	61.586	61.1	58.92	60.529	68.525	56.807	58.782	38.891	63.501	53.736	64.926	55.278	79.05
90.65	110.57	101.16	111.05	97.139	108.09	121.52	97.995	114.35	88.031	96.467	95.574	70.848	94.239
77.763	72.358	65.723	66.877	65.301	64.985	72.584	63.016	69.259	78.868	85.105	102.48	61.885	73.334
53.283	92.681	87.323	106.1	92.194	104.82	119.51	98.199	118.61	61.796	78.654	72.473	73.225	62.246
73.829	157.28	176.55	174.61	181.74	175.45	158.8	180.87	143.53	101.78	115.66	131.1	128.47	130.81
64.267	119.9	142.13	120.31	135.53	133.96	116.85	117.29	123.2	93.791	118.31	121.94	68.08	151.18
67.578	69.597	71.852	83.992	69.967	72.796	86.819	73.831	81.644	81.346	78.959	71.428	72.465	70.458
71.005	143.06	161.65	147.17	155.2	156.3	146.61	143.83	139.78	135.34	120.17	119.14	150.7	96.021
108.38	134.47	135.34	169.21	147.9	154.5	190.49	167.85	199.61	77.926	98.628	115.8	74.056	111.73
119.66	227.62	259.92	213.94	241.98	212.83	173.03	211.98	186.65	183.88	190.14	193.34	185.8	214.29
64.087	86.327	114.85	89.109	108.16	106.66	80.533	86.57	75.884	83.743	81.449	74.239	99.822	62.306
93.207	66.619	88.295	70.601	84.45	78.885	72.767	79.206	71.485	57.036	63.591	72.009	63.267	66.65
89.771	59.733	70.407	52.538	65.252	64.646	62.863	53.16	57.875	101.16	82.859	71.591	83.342	53.593
88.91	54.615	45.364	52.538	47.437	47.018	68.285	53.16	69.151	96.889	77.283	72.169	89.831	88.554
115.03	92.013	89.972	98.481	88.821	106.55	90.632	105.08	102.93	92.184	68.904	75.031	84.292	66.337
76.701	82.621	102.27	91.987	94.892	86.944	90.632	91.942	83.42	61.002	69.826	80.822	63.937	80.913
88.548	59.853	71.951	50.376	62.117	60.775	55.61	49.003	46.863	74.891	67.195	71.605	87.271	67.702
112.68	144.77	174.37	159.1	164.3	150.68	168.64	159.4	174.29	80.35	96.243	100.74	91.937	108.18
87.048	46.613	52.366	57.539	55.054	56.894	50.97	58.125	51.85	37.124	44.814	49.663	28.173	42.437
99.127	85.159	81.95	89.449	84.209	87.642	106.53	81.672	105.33	101.13	75.476	91.307	105.53	74.952
186.08	108.64	108.43	114.23	113.1	105.42	139.96	109.44	145.44	127.14	127.06	106.89	109.29	88.127
107.27	113.83	114.78	117.91	113.48	123.46	119.56	121.92	128.1	91.438	120.76	106.89	98.115	88.127
105.79	113.89	95.505	117.91	106.52	113.83	116.45	126.94	129.23	113.43	122.76	95.41	101.23	110.55
86.62	74.484	72.494	65.779	69.782	76.513	65.739	66.254	74.458	93.807	97.096	99.264	79.924	118.18
93.679	73.319	79.312	100.3	83.206	93.063	98.723	96.999	104.48	48.371	64.193	65.533	48.196	53.255
84.166	46.919	36.779	36.594	37.066	37.285	46.708	30.114	54.326	54.3	64.193	58.909	55.263	53.255
110.69	73.452	87.578	88.271	84.135	81.892	88.608	98.816	99.346	89.285	83.352	72.513	77.761	88.523
103.26	169.69	162.73	171.57	161.81	162.11	169	157.64	148.52	137.5	159.71	185.77	130.55	163.17
195.81	175.86	204.67	195.6	194.37	184.57	170.39	188.81	169.44	142.22	157.21	141.54	138.72	135.97
144.66	118.66	117.24	123.72	118.29	150.19	141.2	123.04	154.49	142.22	131.43	137.31	129.28	135.97
144.66	149.05	144	171.77	136.6	151	152.33	143.36	148.28	132.93	152.82	170.74	121.54	159.68
143.49	134.79	145.62	122.3	135.24	114.14	152.33	123.63	148.28	105.48	120.48	137.23	108.98	153.84
70.37	124.54	102.39	107.67	105.52	110.02	99.928	115.26	107.62	145	125.25	146.63	140	168.49
151.88	79.085	124.35	77.36	109.95	86.099	78.439	88.143	86.796	98.814	92.656	90.765	90.965	85.53
108.46	75.94	81.173	80.264	80.846	81.001	81.019	80.669	82.35	86.124	73.864	65.974	90.965	76.673
101.49	57.212	65.788	79.183	64.891	79.304	81.019	71.305	82.35	47.108	55.543	65.28	47.312	46.879
107.69	64.664	77.313	56.773	66.02	59.098	61.469	59.767	56.265	109.53	82.211	77.145	78.937	80.214
72.536	61.975	69.476	70.625	71.063	76.186	69.607	75.996	72.506	83.001	78.009	67.438	73.731	68.813
115.76	111.1	112.63	87.599	111.35	90.084	78.458	106.29	80.918	135.55	121.96	114.57	145.66	118.11
189.92	105.86	119.09	121.43	118.08	123.03	100.91	121.55	91.33	92.272	96.826	95.059	92.892	100.41
177.29	112.92	113.43	122.81	118.08	124.48	148.89	121.55	146.4	123.92	98.494	97.956	114.21	129.6
140.52	123.23	146.83	167.83	149.47	158.41	154.19	167.42	164.36	107.57	110.98	89.573	89.611	131.75
111.94	216.19	161.33	224.22	177.1	211.17	179.33	249.45	183.91	207.84	196.65	168.71	209.42	155.66
202.1	155.99	143.77	153.96	144.4	153.8	161.31	175.1	186.45	150.28	152.48	150.73	154.75	169.61
185.58	178.29	183.34	153.96	178.91	167.28	161.31	181.09	186.45	182.23	170.14	184.28	169.3	220.11
115.68	128.25	183.34	122.35	169.42	148.49	139.51	151.97	151.96	128.66	110.68	112.41	126.02	119.68
80.416	77.903	80.515	86.257	75.556	90.792	103.69	103.42	124.01	75.635	76.153	96.892	78.988	95.9
159.12	77.903	66.895	86.257	67.701	83.244	91.286	103.42	105.85	122.12	81.358	80.561	87.995	72.59
97.417	138.27	129.28	153.16	130.94	141.75	139.3	142.1	152.52	125.76	115.48	112.78	151.74	124.43
66.403	116.41	102.36	129.71	108.71	128.57	127.11	114.6	139.92	106.78	113.07	105.33	98.229	103.35
105.41	97.51	85.269	122.44	89.284	112.46	147.04	109.69	160.9	87.23	80.175	89.742	73.204	112.85
70.235	98.643	107.77	104.85	108.51	112.46	97.239	114.7	90.002	88.713	83.479	76.414	95.542	59.324
73.374	74.625	123.65	111.63	123.48	126.19	71.347	141.25	69.431	47.015	40.427	39.722	56.459	55.656
105.33	71.694	77.28	89.904	74.672	82.604	72.223	82.396	69.431	68.591	65.286	76.044	54.338	65.607
178.63	121.91	97.088	106.04	99.014	111.76	144.58	107.88	151.47	156.91	118.46	137.15	172.22	164.28
193.39	121.35	92.289	131.37	98.729	121.45	141.06	127.63	141.62	156.91	138.41	138.13	150.4	151.07
112.81	121.35	86.826	128.89	98.729	114.2	114.04	127.63	107.82	108.01	112.92	146.3	89.011	162.69
139.96	155.4	167.24	148.61	161.47	141.86	148.5	138.27	133.75	138.66	128.55	135.28	156.81	118.19
93.092	118.84	126.4	103.74	119.03	100.64	98.349	104.42	96.711	113.95	122.14	128.29	125.95	118.19
79.858	129.73	149.64	130.81	139.52	127.12	113.31	145.99	111.04	139.35	123.77	107.82	147.66	114.62
65.15	103.87	112.91	99.669	109.36	97.875	76.784	119.33	83.898	99.986	100.75	96.463	117.28	96.847
75.951	237.17	261.08	223.16	252.08	226.27	177.56	214.83	171.65	223.14	200.36	178.87	281.01	169.25
104.2	103.62	79.928	101.23	85.992	117.38	130.14	91.855	152.1	109.32	88.46	93.056	97.317	106.2
150.74	103.62	84.885	99.692	85.992	95.302	102.52	92.061	109.94	119.31	88.46	93.056	97.317	79.783
98.574	75.793	84.885	86.721	82.464	101.09	139.48	110.99	130.3	52.7	59.49	75.409	52.004	81.605
79.197	85.284	83.447	84.062	86.22	82.643	107.01	95.999	112.66	74.549	90.667	91.435	67.032	86.397
123.06	132.26	144.45	157.8	152.14	160.34	151.3	186.14	153.69	117.32	107.64	106.47	103.22	118.36
178.39	159.39	180.12	166.93	177.9	179.72	186.52	162.88	195.45	157.74	154.83	184.49	165.39	176.45
92.548	159.39	161.04	146.57	176.75	143.58	143.22	149.69	122.02	122.71	148.19	171.85	148.4	185.31
114.71	87.987	87.888	104.75	89.713	104.23	119.72	97.344	123.64	89.065	85.458	83.884	98.687	79.489
54.43	75.097	79.122	72.258	77.835	82.811	83.456	82.032	93.484	52.163	54.662	64.072	67.79	70.894
53.661	59.859	84.39	57.241	76.228	64.365	53.06	63.443	58.105	49.021	60.486	53.455	46.211	59.089
70.756	59.539	57.877	54.995	61.857	56.159	60.645	58.602	52.012	80.387	66.101	53.455	80.333	65.04
125.5	86.768	101.9	85.143	103.96	98.309	87.345	101.67	97.69	123.39	110.01	124.19	114.54	98.304
73.629	54.398	59.368	61.87	61.583	68.671	63.621	63.105	62.027	58.16	47.936	44.714	54.222	68.33
74.123	73.188	94.771	98.417	90.653	85.496	72.477	100.43	77.187	72.065	62.419	52.971	98.642	40.967
124.26	87.444	95.038	79.315	100.83	74.694	95.894	85.199	90.905	78.075	97.199	88.182	82.664	72.36
84.785	63.987	76.618	65.13	70.482	76.036	78.968	64.443	78.003	90.248	90.032	67.889	107.75	60.561
90.507	93.423	85.272	87.261	86.678	84.754	92.493	88.828	93.058	107.28	91.9	89.448	96.699	69.425
76.127	34.171	30.558	34.652	28.959	38.713	31.482	36.501	31.252	38.625	31.564	68.468	46.117	44.44
76.127	34.171	32.864	23.505	29.319	24.409	18.167	24.751	17.079	80.772	70.486	50.352	78.306	51.951
108.45	24.563	27.805	23.059	28.449	27.537	30.732	22.058	30.012	34.886	31.688	37.24	26.438	53.589
62.655	32.501	27.578	23.375	28.56	28.818	30.732	25.278	38.54	46.172	42.775	49.854	28.507	67.428
49.773	32.501	27.578	27.676	28.56	29.218	26.251	28.134	31.152	39.363	42.775	46.522	25.736	39.713
30.238	11.026	9.8	10.124	10.562	14.371	8.362	11.224	8.7592	15.799	17.126	13.205	14.033	17.479
25.46	10.619	9.9547	9.0713	10.772	13.156	8.362	9.1418	7.3067	15.799	15.412	11.668	14.033	13.73
32.012	11.136	9.7271	8.1413	9.7683	12.364	6.8464	8.3417	7.7111	19.843	17.354	19.037	13.514	16.797
48.087	35.072	46.281	32.373	41.969	44.588	28.079	39.598	27.764	26.173	28.499	29.853	33.937	36.779
31.051	55.699	50.126	44.535	48.884	42.562	38.181	44.196	36.709	68.815	83.47	69.929	87.578	48.708
32.531	39.037	39.142	33.178	37.765	43.379	26.71	33.955	24.893	54.104	46.347	46.038	42.079	41.416
25.971	33.498	37.607	29.555	35.692	27.981	26.884	29.375	21.437	34.007	50.288	33.552	33.793	29.398
27.437	31.757	30.909	26.406	31.058	25.555	22.329	24.773	22.853	38.634	49.82	45.996	34.328	57.501
36.754	28.77	19.23	18.887	20.273	17.354	20.035	18.074	18.404	57.07	53.471	42.375	40.963	57.501
42.883	28.151	27.81	26.57	27.168	27.678	17.28	22.661	15.483	33.564	34.02	29.225	31.852	24.399
36.549	31.304	30.997	28.308	29.536	36.977	23.03	26.044	16.678	41.851	43.553	38.514	35.994	38.875
70.802	60.18	54.416	59.372	57.082	53.83	65.109	55.906	61.891	81.657	74.946	66.827	69.853	48.163
94.383	65.174	53.85	63.399	54.944	61.033	74.905	57.11	70.079	71.949	81.743	76.82	57.086	71.057
113.96	50.026	40.733	40.926	43.844	56.135	38.362	34.451	44.259	58.803	58.74	46.852	54.572	56.62
44.582	51.324	44.623	53.831	46.109	53.727	52.541	59.248	57.682	62.552	60.903	54.948	45.901	49.669
59.157	40.655	39.729	36.986	39.804	39.601	32.951	37.192	38.331	55.137	47.545	54.832	51.85	45.573
80.681	126.13	119.27	128.18	120.76	126.24	150.22	128.63	132.47	93.247	103.9	109.13	78.047	128.56
84.988	107.13	103.7	137.13	111.99	116.58	137.54	128.14	129.48	82.035	101.01	83.138	79.401	69.244
84.988	74.906	66.585	67.602	62.213	69.252	67.383	60.316	61.568	95.519	102.65	85.88	88.198	72.117
86.155	65.968	54.456	73.951	55.927	72.456	82.401	67.559	76.135	112.9	96.168	84.619	95.797	84.766
129.24	171.29	127.13	195.11	139.44	197.76	213.36	176.8	207.96	117.59	137.36	141.43	102.34	140.26
87.284	121.39	85.18	130.7	97.569	116.31	138.56	124.04	131.1	131.81	128.09	138	112.97	102.47
89.075	49.563	38.455	41.733	35.936	44.017	46.15	43.238	56.966	55.128	68.612	69.288	37.693	71.691
66.378	56.632	44.63	58.612	45.844	53.667	54.557	50.722	51.724	67.633	64.494	66.826	52.16	50.883
66.378	69.519	65.821	78.017	66.566	82.246	72.817	73.989	65.887	68.983	77.319	68.352	68.409	61.628
70.333	45.935	53.6	55.354	50.089	59.993	62.097	55.149	66.188	32.422	36.705	37.25	35.78	38.927
80.543	45.935	51.813	44.982	51.434	52.4	50.93	49.73	43.909	40.521	44.06	54.171	35.092	47.575
66.392	45.836	38.355	40.971	34.937	51.151	43.272	36.841	34.867	82.813	71.604	71.801	51.158	65.163
85.416	111.28	115.37	109.35	121.92	100.78	111.32	113.23	119.35	61.711	76.915	114.93	63.77	137.03
168.26	133.5	118.87	141.09	121.92	136.11	157.95	126.04	160.03	140.56	116.04	114.93	134.18	140.22
132.97	151.67	124.39	138.95	125.42	136.71	161.65	122.99	184.56	131.11	148.67	140.22	136.97	127.07
102.67	121.62	115.43	97.864	111.64	120.17	132.23	101.21	144.82	128.93	136.03	169.78	141.64	192.45
170.95	142.95	120.82	106.21	114.64	104.87	121.71	107.1	130.2	155.76	165.55	214.23	150.64	232.08
173.95	185.83	181.86	212.28	185.67	209.29	218.7	212.12	229.59	111.24	140.91	175.06	124.28	177.93
32.764	121.71	105.67	146.15	110.79	127.23	115.92	160.94	123.27	103.95	117.56	124.99	113.63	95.127
67.714	67.836	66.598	89.069	71.15	82.078	107.87	84.211	114.28	39.965	42.287	50.744	41.623	52.021
68.293	81.85	77.378	99.94	88.743	97.383	92.049	104.07	93.726	46.793	53.441	58.574	59.053	56.974
72.142	49.236	48.84	59.828	49.909	59.609	49.712	45.994	46.924	53.46	50.395	46.659	49.098	38.213
59.353	75.578	84.581	66.595	74.519	73.335	69.836	72.886	84.645	75.626	68.93	72.894	83.35	69.049
116.4	73.606	74.591	66.595	71.191	67.77	69.836	72.886	75.051	82.648	73.611	74.211	89.448	84.841
110.43	108.25	124.77	85.291	118.3	105.62	61.736	98.689	59.863	110.85	115.46	107.91	110.43	130.6
82.663	52.548	63.271	40.365	60.619	40.551	40.023	48.87	46.824	57.944	55.87	61.747	49.048	66.721
64.377	24.326	23.881	16.207	20.531	20.689	19.3	15.944	20.622	39.749	35.875	55.896	22.796	58.324
60.3	22.465	19.647	14.28	17.186	20.977	19.243	14.285	22.302	39.016	35.762	46.199	25.174	57.945
53.295	18.696	14.984	14.292	14.014	15.598	12.95	12.024	13.353	40.627	26.701	30.708	23.148	27.859
56.031	16.491	10.054	10.496	10.891	11.566	10.99	10.529	8.7303	49.699	38.146	27.697	31.393	31.524
25.65	9.3069	9.879	9.3358	9.8536	10.5	8.3831	8.5599	8.2379	15.614	11.613	13.596	13.741	15.283
47.228	54.903	74.901	64.518	75.842	63.545	62.59	54.554	62.279	43.929	13.392	34.891	33.673	50.661
45.569	21.963	14.77	17.54	15.656	18.143	18.142	15.403	19.199	24.912	39.874	39.61	19.353	37.301
27.004	10.767	11.656	9.8132	10.927	15.782	10.873	9.0682	9.7468	11.356	13.082	12.194	9.4082	12.855
35.253	14.078	15.682	10.772	15.414	12.683	10.719	12.316	9.7468	20.094	15.564	15.592	15.819	18.367
26.603	10.83	10.921	9.5928	10.635	9.2662	8.491	7.9838	9.4556	15.369	16.593	14.53	14.889	16.779
40.719	34.954	51.909	37.612	53.452	43.778	40.874	33.495	35.329	26.281	9.6069	19.458	27.606	26.994
20.254	34.377	39.866	30.445	35.345	28.98	26.732	24.917	25.367	41.17	31.619	42.083	35.092	38.028
13.669	8.7671	7.0019	7.9005	7.666	9.3515	6.2153	7.4832	6.7616	14.001	13.295	16.954	10.385	18.563
24.268	7.4678	6.1032	6.0631	6.9463	6.0703	4.3601	6.0462	5.6142	20.633	14.361	11.947	13.381	10.758
21.959	6.9636	5.4682	7.1915	5.8588	5.903	6.0437	5.3948	5.8671	10.278	11.954	11.624	8.5685	13.123
14.272	6.5954	7.0529	6.6476	7.243	6.0311	6.0437	4.8684	5.2776	10.708	10.359	18.376	6.1485	13.131
25.323	21.483	16.188	16.025	16.67	17.457	17.856	15.922	16.235	24.913	37.213	33.956	19.991	22.946
17.088	15.309	14.608	13.447	15.644	15.574	12.688	12.109	11.67	16.473	24.647	18.422	14.996	16.002
28.218	14.466	10.868	11.403	10.902	11.819	12.348	12.179	11.047	22.42	21.506	22.594	16.604	15.378
19.452	21.846	17.518	13.3	18.293	20.866	12.887	15.446	11.067	37.775	36.493	23.275	34.106	21.929
32.937	28.278	16.659	15.121	16.823	27.006	13.176	14.821	12.418	55.479	49.914	50.474	44.563	56.329
32.937	27.116	22.323	23.645	23.415	28.444	21.499	20.663	21.412	31.023	34.325	46.283	27.329	27.304
47.089	38.847	33.244	34.076	33.18	34.216	38.674	32.054	30.737	39.617	46.637	58.788	33.581	44.32
29.981	22.561	17.39	18.636	19.819	23.055	18.895	15.574	17.272	32.268	30.846	30.487	23.241	34.435
42.182	39.754	30.412	27.648	30.148	39.773	21.343	24.614	21.634	59.168	58.853	57.292	53.138	56.191
74.206	69.868	51.267	82.612	53.636	73.428	91.183	64.761	89.362	55.92	69.256	67.493	52.515	46.618
55.83	37.874	33.904	39.811	37.442	43.354	45.97	40.813	42.289	37.225	44.936	44.181	38.218	28.335
54.082	63.098	47.118	62.895	53.159	63.013	69.845	61.537	65.039	65.073	75.159	68.856	53.599	47.937
98.238	34.366	36.259	49.279	33.286	50.168	55.366	35.568	60.687	43.13	46.625	50.884	28.828	26.485
64.182	43.869	40.357	41.745	39.983	35.04	45.58	37.055	44.274	65.458	57.38	62.685	54.407	67.488
47.041	28.022	23.197	23.558	24.502	22.323	28.16	23.31	30.108	24.068	24.918	30.797	22.759	40.306
113.5	105.89	106.82	88.42	100.15	93.985	94.943	88.168	100.64	126.97	121.74	128.34	109.42	162.97
66.946	74.777	53.213	48.421	52.68	53.548	45.431	46.711	48.889	125.54	103.78	114.07	113.67	106.93
46.834	58.619	53.213	48.421	52.68	51.929	45.431	46.711	47.093	69.227	74.127	87.021	66.103	84.297
76.591	58.619	45.712	39.616	47.568	51.929	46.635	45.235	47.093	69.227	74.127	96.25	57.036	98.979
112.85	70.222	69.729	59.39	66.623	59.388	50.305	60.326	44.96	106.91	113.82	92.079	80.621	101.32
92.031	82.894	75.269	67.094	75.088	68.408	54.218	65.76	44.96	86.674	92.53	112.73	79.19	80.739
108.09	96.402	63.462	69.156	66.827	64.594	82.241	67.513	78.808	102.88	106.43	123.93	82.339	102.94
168.86	74.128	58.424	78.513	62.715	79.647	107.15	67.513	112.31	84.875	82.724	112.29	74.593	83.873
77.72	76.359	57.253	92.734	65.822	93.216	102.03	85.22	110.27	85.493	95.339	98.961	74.593	91.07
121.34	89.478	91.444	96.535	89.415	101.74	99.845	85.409	115.71	105.05	95.986	104.94	90.638	116.38
56.784	83.624	77.108	87.835	76.906	69.722	87.734	84.099	91.64	93.874	104.08	104.02	72.298	116.38
42.327	74.233	83.374	66.829	81.686	71.129	74.684	69.16	74.457	76.929	72.401	66.114	64.671	85.42
81.776	105.99	98.46	86.391	91.777	87.971	79.957	89.918	88.022	128.59	117.07	131.77	121.2	124.58
69.252	77.183	63.44	75.935	72.287	87.931	80.954	79.17	86.366	67.654	79.277	76.214	66.364	78.473
82.974	148.72	151.91	112.32	143.44	128.87	98.45	129.51	96.477	195.2	186.63	163	170.49	177.65
106.34	153.6	153.88	125.26	153.57	133.21	107.46	130.89	110.42	207.99	164.78	137.99	222.51	151.14
151.86	182.06	170.36	218.37	184.93	198.1	224.8	214.65	227.99	109.19	140.53	163.13	133.12	182.1
113.43	79.753	74.199	89.093	74.393	74.969	86.544	77.049	67.378	83.848	85.922	78.369	89.336	60.251
57.276	42.798	26.776	44.398	27.957	38.57	48.012	37.606	49.786	38.634	56.898	67.597	29.412	70.722
96.199	92.189	106.58	93.84	98.508	91.983	85.681	101.67	81.018	82.074	95.835	102.96	106.41	74.6
65.206	60.128	53.034	64.065	54.011	77.584	74.303	70.887	90.946	57.568	62.037	68.223	60.609	59.165
90.916	74.801	80.152	103.45	84.459	93.633	95.653	90.454	97.712	66.875	66.5	63.806	58.126	66.611
79.506	42.747	45.51	49.723	49.087	43.938	42.053	51.99	40.617	33.189	35.756	44.621	32.318	41.825
93.534	69.986	75.547	55.353	74.998	58.563	51.818	49.256	42.783	124.88	108.73	104.49	106.89	66.744
143.4	144.2	141.08	145.12	141.22	148.72	147.48	150.31	151.1	101.62	102.89	117.48	142.87	121.7
92.507	147.6	141.08	170.75	141.22	149.18	189.59	178.72	172.39	101.62	122.79	127.4	142.87	133.57
147.67	139.18	155.05	131.94	151.83	135.58	119.82	139.04	126.2	114.11	98.01	111.02	113.97	104.1
135.05	110.5	125.15	114.16	117.97	99.749	78.215	114.02	90.406	146.46	140.9	79.482	116.41	91.204
147.87	169.15	203.73	200.93	200.66	188.12	186.82	210	182.7	146.46	151.45	199.67	123.81	145.5
100.1	69.861	58.644	88.619	63.159	78.967	101.29	89.927	108.91	66.257	57.068	64.846	72.101	58.597
50.804	62.365	52.598	80.332	55.64	72.769	88.365	75.296	99.105	49.688	49.517	53.16	40.703	49.592
67.895	64.459	51.866	80.626	55.64	72.769	111.59	68.032	114.15	53.253	61.281	71.657	43.739	64.473
88.365	55.415	47.652	63.63	46.619	54.767	61.797	51.46	61.058	60.368	61.648	71.021	57.857	64.473
99.047	76.942	67.651	82.066	66.389	78.812	59.465	72.239	54.679	75.185	78.55	72.252	74.453	57.417
75.492	33.333	35.349	35.141	35.772	37.624	31.138	33.255	31.738	75.044	52.366	64.08	69.612	38.324
73.817	67.57	86.827	59.588	82.427	58.283	61.047	66.959	58.667	86.485	76.941	78.244	86.963	97.29
71.824	54.972	48.263	34.694	42.008	37.805	32.491	33.501	38.953	86.485	76.941	74.212	83.786	68.335
83.388	30.87	25.017	22.123	27.001	28.067	30.782	22.706	38.214	33.561	36.682	56.131	23.385	46.528
21.863	11.071	12.459	9.9132	13.576	19.301	10.652	12.009	9.7716	18.238	31.619	15.316	13.782	18.145
34.414	12.429	12.557	9.9132	12.683	14.392	10.098	12.009	11.177	16.133	20.91	25.323	12.366	23.772
23.51	16.316	17.375	12.65	17.237	19.902	15.509	11.263	18.116	17.288	22.631	25.228	13.116	41.469
20.222	8.1418	9.7786	9.0626	8.8618	10.533	6.4386	10.243	7.1355	9.7836	18.308	15.696	10.501	14.28
27.058	19.71	17.397	14.45	16.407	12.897	14.146	13.95	12.867	30.939	34.404	30.607	17.249	31.551
48.23	19.869	16.049	17.109	16.235	18.535	15.248	14.283	14.37	32.264	35.794	30.607	20.977	31.551
22.204	14.294	8.5997	10.891	8.7883	16.361	9.1822	10.644	8.7611	28.149	34.432	38.717	17.92	31.914
19.333	18.307	14.865	16.44	14.98	17.161	14.102	11.272	12.633	36.569	31.782	40.082	20.704	33.983
36.185	23.167	12.843	15.767	14.186	16.563	15.469	12.206	15.474	44.621	35.609	42.516	33.103	43.554
64.288	18.473	16.633	17.774	16.939	14.945	15.24	17.008	11.016	43.562	34.104	17.221	33.946	11.172
41.223	21.945	16.004	16.292	19.55	21.718	15.24	15.887	13.338	34.427	28.757	31.677	28.066	26.548
73.501	34.203	25.149	27.386	26.683	37.785	33.383	25.777	24.632	61.69	52.457	37.083	69.775	26.548
47.611	36.396	38.218	35.498	36.306	41.527	37.362	34.127	41.792	43.14	46.602	56.451	37.024	43.856
56.511	36.396	39.329	31.516	37.048	38.267	27.645	30.675	32.8	41.727	46.602	57.502	42.644	41.13
82.068	22.772	19.232	18.214	19.006	26.386	20.966	19.511	17.141	30.278	51.356	40.183	22.92	43.15
51.943	30.249	27.798	25.97	27.22	30.165	30.67	22.553	29.414	38.056	51.356	54.274	23.019	59.443
36.737	58.119	57.938	47.411	55.151	70.444	47.712	50.546	50.734	83.305	75.664	72.505	73.201	96.962
59.213	53.153	43.107	39.946	42.451	38.862	42.332	37.483	44.787	120.58	93.776	80.593	70.455	92.598
53.608	35.983	30.314	37.697	31.137	28.67	33.581	35.131	30.618	42.901	46.718	40.038	32.222	40.301
116.22	60.243	67.374	54.459	66.08	50.447	43.168	52.378	41.746	89.248	77.791	65.765	89.793	56.203
124.35	75.507	69.496	83.839	74.496	81.985	98.959	87.535	106.07	66.171	75.81	80.571	80.789	94.775
61.208	69.21	63.716	66.346	64.497	68.555	98.959	78.175	93.535	63.139	67.266	50.634	47.344	42.882
91.119	73.948	72.13	89.624	77.448	82.59	106.93	89.593	106.19	73.785	83.409	63.954	55.101	59.814
44.697	36.167	30.839	40.659	30.118	35.115	43.936	39.724	41.318	32.393	40.19	52.694	31.386	53.66
69.117	65.664	69.749	78.291	69.195	68.532	66.785	70.947	72.471	66.548	66.795	81.889	60.218	68.547
77.27	104.73	91.837	69.547	83.414	64.77	65.579	71.577	59.527	109.12	97.32	81.889	118.86	91.008
77.377	75.324	64.57	78.595	63.319	69.866	76.662	75.498	78.894	76.728	83.259	84.915	74.852	89.879
81.346	82.407	81.756	54.904	76.761	60.178	43.736	67.564	50.176	132.71	120.06	100.53	119.68	119.6
75.452	82.407	81.756	59.21	76.761	63.935	61.435	69.437	66.081	124.11	120.06	95.37	119.68	106.3
49.804	47.594	49.375	60.625	48.538	57.702	61.561	54.466	57.893	56.239	66.653	46.879	49.515	58.102
58.093	58.813	57.588	50.253	65.622	50.151	52.465	58.282	55.416	44.184	51.103	48.504	42.228	56.068
39.309	60.229	49.752	61.896	52.871	65.097	75.793	59.649	78.579	28.612	51.103	60.198	31.132	59.941
72.362	65.183	48.232	62.041	48.397	56.787	62.616	55.525	58.654	78.127	86.425	88.837	66.357	77.878
72.362	92.804	86.283	112.52	90.281	99.393	106	112.39	112.36	78.915	82.643	80.137	66.925	93.277
66.652	86.923	102.31	96.45	120.95	87.52	90.533	99.008	90.011	56.969	68.308	78.415	74.915	73.678
51.787	70.168	71.513	92.367	75.9	87.52	68.528	95.145	67.301	88.168	70.024	81.374	73.624	70.575
137.71	83.332	80.353	59.807	70.72	64.352	67.207	60.893	75.118	121.08	100.54	97.083	107.35	122.7
210.53	197.94	195.92	194.3	199.35	186.18	193.35	188.35	190.5	177.9	191.71	158.09	189.69	209.68
115.13	134.99	142.3	176.09	140.86	171.25	173.45	156.7	169.09	119.37	117.02	97.081	145.24	81.089
192.28	132.56	117.4	129.19	127.95	122.73	104.15	135.15	102.8	144.5	147.43	131.6	145.24	145.82
91.435	64.775	83.067	74.098	80.486	82.505	76.406	80.91	91.468	44.316	48.402	62.211	39.636	67.047
158.84	73.123	103.5	122.65	104	125.92	92.212	172.1	94.736	61.811	63.221	121.4	59.607	67.047
74.196	87.028	92.759	101.15	91.722	94.315	92.059	99.353	86.107	61.338	76.783	87.023	67.143	57.937
96.849	81.062	72.748	101.06	75.486	94.315	92.059	101.24	86.197	55.351	70.196	68.413	55.399	52.101
37.382	51.322	67.937	57.155	61.572	63.034	44.63	65.441	42.033	62.485	57.786	77.588	75.124	55.515
130.48	46.201	41.618	37.6	39.684	38.961	38.507	38.373	36.532	43.845	53.855	65.22	43.279	49.595
70.812	72.235	67.448	78.728	65.833	76.896	74.294	73.309	72.907	46	58.398	65.22	50.882	51.639
120.15	74.05	92.629	77.293	92.944	79.332	77.869	74.649	77.669	92.233	74.111	73.656	91.341	69.298
119.54	146.95	145.58	121.26	135.46	110	112.09	114.51	107.61	177.25	179.55	182.52	196.85	193.28
151.82	122.14	136.51	121.28	131.99	119.64	99.011	129.9	113.46	157.51	143.48	123.69	180.15	161.98
102.44	96.531	106.05	123.21	111.24	117.48	103.83	158.72	120.72	96.759	79.037	64.964	90.263	65.514
139.95	130.35	147.3	134.19	145.22	137.35	159.13	156.79	152.21	110.23	113.77	112.09	122.09	101.1
127.86	133.1	147.64	170.89	148.5	164.44	132.24	188.93	139.97	123.52	127.84	139.42	134.5	150.83
103.28	149.24	137.57	122.86	133.16	118.04	156.67	129.1	150.53	169.97	173.67	181.87	173.38	159.55
116.68	166.26	168.71	177.9	177.48	163.32	177.8	177.73	163.7	178.91	179.04	189.05	154.18	165.97
157.04	125.46	163.94	150.66	161.7	154.24	148.82	164.46	173.5	116.82	96.215	107.34	115.27	109.36
134.31	143.51	153.02	144.27	144.92	147.06	160.79	134.21	146.48	134.22	124.38	126.77	160.58	130.61
133.13	211.22	199.52	238.37	208.9	221.4	201.05	232.87	187.86	161.64	179.75	160.83	196.92	125.94
111.05	88.23	85.422	84.158	84.02	77.11	82.892	103.22	82.252	81.267	102.4	87.556	79.838	75.158
46.889	60.109	66.69	91.204	66.096	72.402	77.313	94.292	73.924	50.452	62.266	101.14	40.937	55.324
83.751	38.911	48.284	38.147	45.543	45.73	45.632	39.688	55.04	32.816	39.779	52.316	30.734	35.216
83.751	77.762	98.839	50.931	87.984	58.122	36.557	64.437	31.153	104.75	117.7	88.628	94.727	68.992
75.69	121.15	126.46	137.57	122.68	130.08	126.65	133.78	133.08	85.671	97.578	94.683	94.727	68.992
153.93	82.249	79.187	113.2	86.425	106.43	118.32	92.53	133.08	38.477	58.456	74.853	46.822	75.426
136.07	97.524	80.868	89.515	77.563	109.54	143.89	89.605	125.52	133.95	136.86	97.61	108.39	93.962
106.62	83.707	69.693	80.276	71.552	71.907	86.882	74.606	102.94	86.494	80.979	81.723	108.28	78.433
119.86	204.03	180.43	191.3	170.69	179.73	230.86	164.77	239.1	178.48	203.69	228.66	176.3	246.92
155.7	172.07	180.43	137.03	170.69	146.09	134.46	149.75	155.89	163.47	161.89	172.73	176.3	207.87
72.985	111.61	82.443	119.07	87.546	110.26	134.46	101.47	134.36	88.897	97.714	123.48	78.285	122.57
136.92	105.44	96.523	103.15	99.938	91.015	109.96	101.99	104.94	86.361	96.975	100.34	96.153	102.07
125.75	97.007	82.306	106.27	81.094	91.015	109.69	101.89	104.94	122.01	119.94	81.464	133.41	83.986
82.991	85.979	66.012	98.665	74.573	91.826	97.631	101.89	98.078	73.64	83.055	62.069	82.223	76.361
54.701	46.21	50.344	54.728	48.144	51.507	57.149	48.134	47.358	64.203	51.683	45.203	61.855	37.194
133.11	170	178.49	168.78	179.46	178.01	147.18	180.32	131.85	135.67	128.73	120.39	153.88	115.57
179.75	166.95	167.28	157.54	169.57	167.85	147.18	154.31	131.85	156.95	167.99	124.11	175.97	125.96
129.72	205.04	221.02	195.42	214.17	194.09	177.07	216.25	190.9	196.64	196.79	176.26	211.75	196.99
104.66	192.22	215.59	224.33	213.33	229.94	211.32	216.31	182.14	120.76	144.85	188.86	94.936	183.75
95.683	127.05	113.03	139.14	106.01	151.82	140.57	146.75	141.88	87.524	93.175	91.106	119.78	89.483
123.46	127.05	113.03	88.649	106.01	93.464	84.598	95.445	88.097	109.66	138.31	131.53	110.75	135.12
163.74	85.155	98.522	103.93	99.706	111.57	112.54	97.756	127.33	51.869	64.274	78.156	57.369	96.469
63.981	63.69	67.67	65.318	69.904	75.957	81.584	71.189	70.854	70.77	91.321	88.888	81.762	66.127
79.584	61.305	67.67	60.011	68.579	52.86	66.166	71.189	70.849	87.966	91.321	93.897	83.158	66.127
97.392	72.937	60.121	85.619	58.737	70.233	85.569	66.543	64.184	78.452	88.779	80.77	75.344	55.15
86.719	69.017	75.763	74.507	71.53	86.082	92.843	72.838	88.275	43.722	60.467	64.633	57.951	58.198
66.314	59.537	70.493	71.151	74.021	86.082	57.032	70.652	53.229	58.744	47.518	46.097	58.689	38.611
109.12	141.7	177.1	136.86	176.22	140.79	126.86	144.35	125.62	138.31	150.25	132.27	137.66	114.42
80.859	57.711	50.932	56.163	50.202	54.298	55.905	49.508	55.154	85.452	89.192	76.524	75.441	67.357
63.73	50.637	39.006	45.262	44.331	40.696	48.861	44.676	61.125	62.003	55.47	64.949	45.093	80.921
71.721	37.79	31.74	31.997	31.69	32.065	47.729	34.278	34.504	43.347	37.805	43.055	29.097	51.075
73.617	43.665	31.27	36.748	33.085	39.36	54.233	38.441	49.308	44.645	44.621	53.487	32.342	57.329
85.506	24.423	22.773	20.93	22.42	28.732	28.153	21.846	29.7	39.871	46.757	48.097	36.474	35.579
28.687	17.166	10.089	13.172	12.544	17.137	15.127	11.704	20.725	34.21	31.914	35.87	25.349	39.05
28.685	15.847	16.942	12.612	14.419	16.01	9.7162	12.37	10.83	40.615	31.151	17.265	25.349	22.427
30.534	11.332	10.21	8.7295	12.165	11.123	9.1753	8.8642	8.4745	21.564	18.007	18.803	16.043	16.873
29.443	14.91	17.359	14.807	19.812	21.39	8.8145	12.09	9.9218	23.088	21.913	25.923	18.938	17.777
41.402	24.272	16.101	17.046	17.239	19.96	16.059	14.062	15.804	44.301	41.541	36.536	22.118	35.659
21.911	25.418	31.666	21.945	29.344	25.176	22.248	25.359	21.649	29.192	22.916	28.651	30.914	34.55
22.606	25.418	31.666	21.728	29.344	25.176	27.994	24.346	21.649	25.832	19.114	24.557	21.78	25.24
21.959	11.005	9.5809	7.3105	9.709	8.4191	6.5236	7.7526	6.7455	17.849	20.411	20.47	10.56	21.793
32.133	9.6141	8.9241	7.2775	9.2512	7.3815	7.0483	7.3688	6.4408	10.774	18.997	9.9952	11.521	13.824
24.356	9.9776	7.2283	7.1016	7.7074	6.4273	6.637	7.716	9.1425	14.643	18.012	16.123	13.08	16.21
23.144	11.566	10.394	9.1451	10.416	9.6374	8.2072	10.161	7.5811	18.545	22.84	16.123	14.677	21.074
22.266	7.4874	9.0829	6.8012	8.4703	8.3176	6.6438	6.8267	7.1428	13.742	13.745	15.279	9.4281	11.053
25.237	18.017	13.723	10.823	14.442	10.63	9.7357	13.944	10.232	26.506	27.022	25.491	21.646	26.324
29.575	11.943	11.345	10.542	11.75	13.962	12.944	9.3508	10.183	17.339	18.861	20.391	13.318	17.428
30.522	10.112	11.149	8.3377	10.331	13.203	8.7086	7.6258	7.703	14.47	17.55	15.863	10.773	15.65
16.805	15.97	11.566	12.033	12.585	15.163	13.315	12.738	11.634	21.313	22.894	24.058	15.875	19.016
23.399	20.392	15.156	17.839	14.974	19.202	19.724	15.899	16.596	31.302	33.212	27.557	21.78	20.993
29.976	30.318	25.217	23.01	25.529	27.844	25.243	22.791	19.94	37.679	42.7	36.059	30.212	29.355
24.078	19.93	16.953	16.719	16.511	18.597	14.29	15.881	13.506	20.144	25.748	24.433	19.793	22.917
26.045	15.181	15.316	13.732	15.566	15.603	13.445	12.238	12.686	16.539	18.411	21.674	14.486	17.646
30.7	15.181	16.084	13.717	15.566	12.269	12.857	12.267	14.15	16.719	27.168	22.776	14.611	20.095
18.409	21.07	15.141	14.17	14.739	17.952	12.493	13.926	12.691	31.047	31.495	34.001	26.402	29.974
18.963	12.383	12.016	9.9947	11.15	14.901	6.8237	11.212	8.1781	24.915	18.105	18.88	15.907	18.527
16.854	14.143	11.467	10.229	10.786	11.125	8.8863	11.123	8.1781	23.366	20.921	25.245	20.585	25.002
23.775	15.752	12.079	11.839	12.717	12.48	10.951	13.651	10.912	23.366	21.298	25.078	20.024	24.336
12.592	12.117	14.517	11.839	13.875	12.48	11.875	11.241	10.242	21.115	22.882	14.356	14.859	14.352
25.452	20.777	23.432	18.207	22.474	22.399	16.154	16.544	13.27	30.61	33.207	26.667	25.289	21.387
28.538	19.187	17.974	13.511	16.905	15.065	14.259	14.466	13.391	33.573	27.796	28.516	22.256	35.093
32.899	17.399	17.974	13.511	16.905	14.559	14.259	14.466	13.432	20.209	20.548	22.046	20.579	15.447
26.286	14.934	19.331	11.311	19.364	13.668	9.6115	12.918	8.4355	13.641	17.122	29.713	13.475	18.717
21.284	14.829	14.28	10.756	13.929	17.156	10.239	10.781	9.8542	19.406	19.194	21.471	23.573	24.787
15.405	14.829	13.106	10.756	12.821	11.611	10.239	10.781	10.517	19.283	18.074	16.508	20.487	26.608
26.566	31.924	31.477	25.109	32.293	29.624	23.422	31.375	28.166	36.421	35.527	32.568	33.731	48.47
26.948	13.66	13.284	12.352	11.964	13.283	12.423	11.498	9.8261	14.74	21.975	15.365	14.913	15.029
25.857	15.624	16.398	14.587	14.481	12.418	11.991	13.028	13.235	22.992	24.119	19.438	22.006	32.386
34.485	20.3	19.53	16.333	19.815	16.263	13.791	16.209	12.571	26.023	28.502	26.341	23.084	25.118
27.165	15.235	10.597	11.668	10.27	11.753	13.834	10.813	10.6	20.928	19.603	22.98	16.26	18.409
30.375	18.198	19.169	14.497	19.791	16.669	22.675	16.58	18.958	31.566	28.507	33.152	16.717	26.587
20.891	14.975	13.42	10.5	14.324	10.238	8.2965	11.45	10.522	22.557	21.7	17.557	16.158	20.356
13.971	9.3172	8.1145	7.6327	8.3117	6.8457	7.7559	8.3862	6.9701	23.016	15.263	14.729	15.773	12.808
25.34	16.415	14.992	11.085	14.594	10.552	11.305	12.312	9.8969	19.265	27.422	26.954	18.34	25.405
18.431	23.118	19.052	14.756	18.578	14.416	10.699	16.784	12.555	32.777	35.04	29.938	29.847	28.569
24.87	16.747	18.759	13.944	18.909	15.55	10.905	14.907	10.454	17.873	17.97	20.498	23.777	26.052
26.929	13.42	11.11	11.556	10.886	12.113	8.4065	10.435	9.686	22.298	23.587	17.04	18.301	17.448
24.374	14.11	14.244	10.975	13.818	10.175	10.38	11.695	11.797	18.35	22.486	20.472	19.396	15.529
24.374	10.762	8.361	7.6951	8.4022	7.9614	8.1381	7.6169	8.9135	18.349	20.438	21.332	14.703	19.948
28.374	9.7299	8.7811	8.0776	8.6173	7.9614	7.2481	7.6169	5.9049	15.85	19.593	22.113	11.152	14.23
29.363	21.075	14.148	20.119	14.414	16.283	15.413	18.227	13.943	26.957	31.329	28.643	26.601	24.167
19.7	10.818	10.982	7.9122	11.195	9.0938	8.2958	8.7012	10.62	13.198	16.722	13.739	10.137	16.577
25.943	17.833	16.234	16.075	16.432	14.01	13.84	16.639	14.362	21.464	26.401	21.003	18.697	17.809
15.818	13.025	13.351	11.521	12.89	11.431	10.246	12.184	10.573	15.584	16.579	18.906	14.638	16.743
26.154	9.2593	7.3303	6.6015	7.6122	7.8102	6.6173	6.2259	7.2776	10.352	20.55	14.331	8.4548	18.76
24.661	10.25	8.168	5.4519	6.5811	6.5504	6.5655	5.676	7.026	13.106	18.082	14.229	13.226	14.411
15.535	10.019	9.3539	8.5152	9.4707	7.7402	8.8691	7.4531	8.3454	12.859	14.964	14.883	12.597	12.748
30.93	16.653	10.993	11.681	11.425	15.696	10.05	10.777	9.4567	44.122	33.959	23.716	30.482	23.564
24.403	19.941	14.24	13.354	16.293	15.784	11.975	12.537	11.929	51.32	40.618	31.668	34.94	35.171
32.604	14.805	11.794	11.187	12.193	10.81	8.868	11.339	8.1214	28.615	30.725	26.588	22.907	32.183
12.891	15.781	15.784	12.827	15.885	14.689	11.685	13.984	11.44	27.322	21.22	22.203	22.698	21.07
30.356	13.109	15.251	10.542	13.257	10.39	7.6225	10.52	9.3459	17.567	21.476	22.203	16.92	18.588
18.346	13.109	15.01	10.584	13.986	12.163	10.977	11.836	10.565	15.434	21.528	16.984	18.269	16.143
8.8227	9.8088	8.3457	6.6577	8.3273	7.2378	8.59	7.8267	8.9146	13.152	15.139	16.984	12.395	12.652
23.697	10.493	14.317	10.268	13.676	12.458	7.1558	11.247	7.6606	13.756	14.218	11.689	14.342	12.513
36.321	20.706	25.46	19.68	26.16	20.875	17.204	19.65	20.715	22.435	20.756	28.472	16.478	38.945
40.684	15.364	17.764	11.796	16.87	10.47	11.199	14.263	12.236	21.77	19.798	20.039	13.445	23.178
23.242	9.8509	8.7038	8.0302	8.627	6.9446	6.1282	8.3385	6.4042	14.372	16.579	15.047	13.177	17.609
23.859	11.467	9.2037	8.3303	9.5738	8.4842	7.6627	9.6722	8.7643	15.794	16.217	18.582	12.635	15.667
28.366	23.501	20.567	16.29	19.3	18.027	14.048	17.3	13.143	27.49	31.453	35.238	24.308	15.695
27.35	35.512	29.664	27.804	30.391	29.872	23.925	28.269	24.006	47.083	48.572	51.479	43.568	43.06
27.362	46.243	43.303	39.264	43.016	39.8	40.646	35.086	34.187	40.833	55.333	51.479	40.958	43.06
37.532	22.632	18.038	13.885	18.361	13.776	14.649	15.099	14.455	35.275	30.984	29.761	25.618	29.292
54.781	32.509	21.281	21.14	20.022	20.323	23.621	19.015	23.387	52.794	62.226	51.129	38.387	44.928
49.961	36.814	30.169	31.305	31.667	28.895	26.974	27.14	23.378	67.364	57.484	44.763	57.498	44.811
31.964	38.138	32.839	37.518	31.89	32.168	41.565	33.177	31.445	59.78	55.288	45.87	58.247	44.811
88.17	33.482	35.652	31.406	33.065	36.721	25.656	27.772	28.407	42.633	44.2	43.876	34.138	47.037
194.33	93.086	98.967	91.314	92.299	91.808	101.4	87.663	109.7	70.195	73.998	73.043	71.66	78.091
156.01	76.185	94.818	70.776	92.222	77.968	71.038	62.079	69.166	74.348	84.36	83.086	74.292	80.227
43.015	53.719	41.303	45.916	42.608	49.336	53.508	44.988	54.636	57.697	69.388	67.522	48.406	77.63
42.639	54.968	41.303	45.916	42.608	49.336	53.508	46.517	54.636	101.46	88.133	67.53	64.098	64.011
74.805	58.617	69.418	74.011	70.749	74.953	70.011	68.9	67.696	52.131	70.731	45.582	70.475	43.681
44.725	54.344	69.719	56.659	63.001	66.468	72.794	59.127	74.992	37.302	52.05	54.311	42.331	66.23
101.15	106.13	86.122	79.966	96.732	92.309	81.906	85.462	86.879	97.307	93.414	122.87	110.18	110.04
87.612	108.61	84.451	104.59	99.209	90.396	127.85	109.04	135	114.75	111.72	107.98	114.94	117.18
67.208	211.36	221.57	200.94	214.36	174.07	132.55	202.23	127.01	230.79	208.53	164.46	253.14	123.42
52.615	105.24	82.085	134.05	94.001	122.3	124.1	119.96	135.99	75.659	85.963	89.63	65.867	74.996
111.51	131.86	146.88	132.65	144.94	129.71	141.44	135.48	146.79	78.001	93.67	107.09	85.73	144.74
92.448	81.546	67.171	64.426	64.359	53.693	72.248	64.221	72.146	98.504	89.011	82.234	95.07	100.53
167.07	89.405	83.888	70.097	81.951	71.621	72.248	69.32	64.172	98.504	113.2	115.96	95.07	120.46
75.76	83.749	70.695	70.097	72.965	71.621	70.536	69.32	75.856	68.356	90.873	101.25	63.047	112.72
88.763	63.3	61.639	67.401	62.941	76.557	77.512	62.69	79.537	74.06	70.222	66.628	61.897	81.431
102.09	63.3	61.639	67.401	62.941	79.767	66.419	63.895	77.052	74.06	92.913	66.628	68.349	65.034
115.26	60.127	55.581	59.135	55.87	63.233	67.008	63.895	77.052	61.725	88.512	85.013	51.166	90.768
108.59	88.248	100.18	97.307	106.26	90.297	114.31	112.55	118.54	101.76	79.376	70.575	93.053	55.195
179.05	115.33	107.74	105.02	120.37	113.07	115.47	115.8	118.54	84.95	94.884	95.284	92.849	107.83
164.71	159.82	190.36	205.57	201.76	214.19	205.76	207.62	199.45	126.63	125.39	107.95	133.58	103.56
112.42	76.607	80.979	92.686	83.105	92.661	92.017	91.812	98.073	50.985	72.171	70.016	63.094	74.793
121.29	147.2	139.15	148.68	149.13	146.95	167.57	162.84	164.93	110.4	123.18	123.13	134.88	119.99
65.623	76.701	82.876	98.494	94.948	101.12	87.727	119.75	92.439	60.726	61.116	56.259	58.057	52.617
156.65	76.701	97.932	98.494	96.267	101.12	98.41	119.75	117.32	98.831	83.281	82.572	98.157	83.598
128.41	186.44	200.95	218.18	210.62	223.9	226.48	211.02	239.4	99.934	145.03	144.31	110.68	149.52
128.03	186.44	200.95	203.14	210.62	197.59	190.03	214.32	186.44	197.68	195.52	176.1	213.57	178.69
163.54	164.29	124.11	195.21	149.33	184.33	237.34	219.88	254.36	111.58	130.33	154.96	109.38	194.55
131.39	136.18	122.73	153.21	135.44	148.75	158.98	150.17	166.53	84.222	96.595	96.324	75.127	75.261
70.325	59.243	70.402	64.396	70.295	64.803	77.781	77.06	73.472	77.948	62.285	62.048	49.807	63.993
58.678	98.125	110.99	78.767	100.33	85.314	77.781	82.716	73.472	67.047	75.495	99.447	93.642	83.775
97.427	45.476	54.999	57.62	49.536	56.901	52.812	54.646	45.951	48.785	48.795	44.035	48.846	39.081
76.179	90.054	98.541	84.479	87.294	90.065	87.993	87.316	85.627	81.547	76.801	91.464	95.253	91.261
58.548	115.05	110.28	123.91	111.42	115.62	127.44	121.15	120.75	108.63	120.71	108.46	109.29	92.689
52.829	115.05	93.912	110.87	100.88	112.84	127.44	115.04	126.03	97.083	103.69	108.46	81.485	91.421
156.01	169.76	176.91	180.11	175.22	171.4	184.2	168.19	189.71	196.19	162.83	151.07	203.6	148.27
179	135.47	190.48	133.77	180.73	134.79	141.54	162.88	151.67	244.1	187.49	162	213.03	154.86
110.74	114.15	113.18	92.241	107.57	90.748	85.724	112.59	94.423	133.12	119.8	119.53	144.9	138.31
227.85	173.9	172.51	159.65	174.95	162.15	179.11	164.09	184	160.87	149.53	171.47	168.33	184.9
101.61	155.27	160.83	174.67	165.42	175.41	144.02	186.19	133.82	107.92	124.52	134.12	130.21	143.48
149.28	128.85	107.28	139.3	112.94	139.09	161.32	123.97	176.66	90.226	117.1	134.12	114.26	143.48
95.495	107.63	109.73	91.744	103.05	86.825	76.4	90.512	74.222	162.57	133.11	125.66	181.94	101.43
95.495	74.052	84.315	72.803	78.547	79.564	67.159	75.394	70.855	80.524	83.056	80.698	89.084	93.611
94.807	56.351	41.841	56.991	45.323	49.676	67.066	60.471	70.855	68.085	60.31	56.051	61.316	57.999
98.531	77.871	49.084	73.728	55.382	63.865	61.13	64.251	74.945	76.157	69.724	74.736	77.971	68.227
96.497	83.7	95.579	98.92	93.683	85.654	76.897	96.152	80.986	76.157	80.638	82.04	77.971	68.227
81.423	113.98	112.25	113.87	112.52	111.37	97.575	118.71	94.801	96.536	92.392	97.806	103.26	101.22
77.639	79.555	84.361	98.394	82.502	100.59	94.72	93.676	102.95	60.806	60.652	73.618	59.78	83.975
96.206	152.02	161.65	142.87	161.63	138.91	127.3	153.65	124.55	125.12	146.15	148.23	129.35	150.37
189.65	152.02	161.65	142.87	161.63	138.91	127.3	153.65	124.55	163.17	146.15	148.23	168.6	154.24
105.57	109.18	119.47	121.65	118.4	114.51	124.8	120.11	114.58	124.7	113.55	127.62	132.47	125.82
190.23	124.98	114.62	117.63	114.79	111.56	134.62	124.86	145.43	158.87	155.17	153	169.94	151.22
129.75	164.92	150.96	169.79	158.04	165.18	166.64	188.57	158.57	152.59	162.25	182.81	158.52	151.22
98.735	163.24	172.13	169.17	177.79	177.41	166.28	183.69	157.05	120.8	136.06	141.84	121.19	135.31
133.16	61.404	92.152	92.775	88.605	104.87	72.208	90.508	66.354	55.102	45.562	61.804	60.251	42.907
163.84	115.87	101.56	155.79	112.9	139.99	137.07	151.14	146.52	77.098	102.43	112.46	102.93	113.16
221.92	115.41	140.43	189.32	143.15	139.99	162.53	185.24	146.52	125.31	103.74	135.12	118.57	88.371
161.09	106.99	96.42	129.74	101.44	103.47	140.37	143.2	138.63	93.589	103.74	118.36	118.57	102.63
155.2	160.01	169.88	160.25	170.29	156.19	166.77	166.41	186	154.09	143.55	143.02	170.65	159.51
132.92	120.83	105.94	133.38	118.46	129.06	139.72	133.66	142.49	78.653	90.708	99.092	89.837	131.33
109.35	118.4	170.96	120.48	165.39	143.9	126.43	159.88	116.93	118.4	103.96	96.084	129.06	110.48
129.41	168.65	143.37	163.84	149.45	148.53	143.99	166.74	135.7	122.57	113.6	109.84	135.48	89.596
148.06	93.458	85.739	103.58	90.193	129.2	123.3	99.701	133.15	101.17	101.11	115.18	89.067	106.97
102.6	102.41	112.6	119.31	109.73	116.99	124.79	110.43	133.15	101.17	101.11	115.18	89.067	109.02
99.634	97.803	112.6	93.846	101.21	95.824	109.94	84.274	97.575	67.269	98.467	101.65	90.229	95.608
142.24	126.99	113.6	126.14	115.69	118.29	111.91	121.14	114.12	119.14	120.82	116.18	142.12	126.1
74.723	166.4	160.53	141.6	160.07	151.52	128.55	161.91	140.05	147.48	163.31	160.88	178.63	149.42
62.328	63.973	62.206	63.166	60.293	66.732	60.144	61.831	58.736	90.694	88.443	79.535	82.77	81.282
88.899	63.973	62.206	53.175	60.293	55.803	62.292	52.357	62.315	82.574	91.854	78.058	78.2	73.308
140.11	76.932	114.17	72.123	104.54	84.773	63.297	87.239	64.076	65.394	49.309	43.142	82.074	51.055
124.03	68.829	121.63	80.004	104.13	86.36	68.166	89.384	71.839	83.799	80.877	79.432	86.029	78.704
179.23	190.41	198.02	188.75	196.06	180.91	178.19	186.88	196.8	215.24	200.08	208.9	216	249.69
131.16	205.07	197.5	211.68	209.12	217.76	237.76	200.47	250.34	144.82	157.77	188.84	138.54	247.5
133.87	190.82	174.24	213.05	166.97	221.92	222.32	238.77	267.92	179.24	163.57	150.37	195.02	176.38
101.29	165.08	167.49	150.62	162.29	143.97	174.99	174.39	203.82	233.41	225.01	176.21	199.42	141.18
110.32	236.8	219.8	224.93	240.28	231.95	210.14	198.13	213.15	216.49	219.1	196.4	197.02	215.2
122.05	155.7	123.98	159.04	131.38	142.89	161.54	142.64	167.21	107.19	128.08	134.66	122.35	160.1
140.79	157.36	123.98	156.71	136.15	161.15	146.16	156.94	147.37	122.71	141.76	134.66	132.01	160.1
174.9	90.58	104.89	108.87	104.97	111.04	128.03	104.85	141.82	63.574	62.248	80.623	52.268	86.254
135.89	184.93	261.32	199.78	255.42	211.49	174.77	221.78	186.13	128.14	133.84	113.93	159.42	115.4
206.7	315.03	285.54	285.25	289.82	282.71	263.5	287.99	253.45	289.46	285.06	288.82	303.36	344.46
140.36	178.54	213.58	183.95	213.62	196.95	189.79	189.94	188.68	113.29	139.18	138.66	117.33	131.7
128.79	128.15	121.34	128.07	123.45	112.52	124.62	122.17	123.13	132.86	124.05	136.89	143.52	140.94
132.39	268.77	267.41	299.88	262.76	281.24	307.54	284.35	293.09	158.46	202.85	193.51	219.71	213.72
133.86	163.07	169.67	167.89	168.13	173.19	173.96	196.4	173.23	149.03	160.63	143.03	143.5	167.23
99.346	67.182	79.24	84.431	75.852	79.3	86.624	74.333	94.796	57.251	54.634	57.798	67.299	46.733
141.41	74.55	108.51	84.701	99.955	82.074	81.783	86.116	86.872	103.47	90.001	79.269	112.73	56.369
133.08	83.582	90.514	88.017	89.634	77.868	96.195	85.666	97.491	78.922	76.161	77.438	76.964	82.577
134.55	63.539	70.188	61.456	63.111	71.527	68.275	61.112	74.112	81.643	83.812	81.489	67.239	77.449
104.13	91.924	101.28	97.513	108.7	80.457	99.56	129.74	90.733	101.16	84.967	85.555	104.3	82.147
82.149	93.831	101.28	104.29	108.7	106.87	110.3	112.76	113.13	59.886	76.189	62.069	95.383	65.265
133.74	128.99	133.83	133.39	133.12	146.87	127.04	122.67	131.56	133.44	106.91	100.56	131.55	134.77
107.95	154.8	172.83	156.3	172.98	169.19	171.91	156.27	155.84	170.67	168.54	195.98	144.96	179.38
119.58	141.09	167.64	150.3	167.5	165.21	169.06	156.27	162.28	111.5	107.89	116.52	119.53	137.93
148.21	188.9	170.06	196.88	174.63	169.09	201.39	187.14	182.14	244.83	219.01	184.82	221.32	211.14
204.32	190.1	191.42	196.88	194.39	193.21	201.39	188.94	182.14	244.83	236.14	222.29	221.32	211.14
160.58	190.1	191.42	190.27	194.39	193.21	151.89	188.94	162.41	156.3	151.23	155.46	142.6	162.9
172.44	254.49	256.59	288.31	260.64	289.58	267.95	280.65	270.39	206.61	220.64	200.22	201.26	180.75
172.44	142.33	128.3	134.89	124.23	130.82	143.78	135.37	150.42	137	128.96	146.35	145.4	157.37
183.06	137.5	131.68	134.89	127.06	130.82	143.78	135.37	154.42	107.83	116.82	126.66	129.84	157.84
110.72	109.5	99.232	141	114.83	145.53	163.93	151.06	174.99	137.11	125.49	99.335	127.78	96.365
141.6	107.01	93.308	102.62	104.67	101.99	126.16	96.997	119.25	111.5	95.868	93.739	100.84	96.365
[truncated: 41,201 more rows]
