# Supplementary material for: Global sleep homeostasis reflects temporally and spatially integrated local cortical neuronal activity
Source: eLife. 2020 Jul 2;9:e54148. doi: 10.7554/eLife.54148 (PMC7332296; doi:10.7554/eLife.54148)
Supplement: Figure 1—source data 1. [file elife-54148-fig1-data1.zip › Figure 1/Slow Wave Activity/Slow-Wave-Activity-Mouse-2.csv]

Frontal EEG	Mean LFP	LFP 1	LFP 2	LFP 3	LFP 4	LFP 5	LFP 6	LFP 7	LFP 8	LFP 9	LFP 10	LFP 11	LFP 12	LFP 13	LFP 14	LFP 15	LFP 16
13.913	23.02	27.342	21.669	29.58	25.72	26.704	23.502	35.417	16.691	19.893	20.086	23.062	20.787	23.263	26.482	24.36	21.723
20.563	30.596	36.67	53.235	44.325	30.246	38.067	23.502	35.417	27.642	51.011	84.078	24.36	26.986	30.067	43.207	31.172	45.82
37.224	176.97	137.13	157.87	185.39	171.04	181.21	150.72	172.77	125.85	191.97	84.322	183.22	138.2	196.97	145.92	209.06	172.17
21.451	142.58	182.42	113.16	140.3	123.07	138.54	113.72	176.69	94.563	139.94	79.541	154.52	103.48	151.06	104.29	177.45	167.33
12.034	321.18	262.62	240.4	264.25	307.92	315.32	242.77	332.32	212.44	318.69	162.24	295.34	208.22	314.7	199.83	351.7	307.04
9.5618	48.376	52.3	65.329	33.84	65.864	62.228	45.664	87.555	41.924	65.196	32.549	53.619	24.218	41.453	22.964	58.683	42.125
17.169	104.18	94.492	83.019	83.479	100.37	99.178	88.134	98.838	81.003	122.06	48.017	113.75	64.281	132.75	80.311	132.54	115.15
12.109	36.196	42.092	38.022	51.419	29.543	39.734	31.51	39.97	21.257	40.727	25.082	36.233	28.107	33.817	26.179	28.19	34.314
8.4547	29.949	31.033	43.156	43.419	29.543	37.104	25.354	28.9	21.257	31.075	17.103	32.78	18.766	37.701	30.713	28.19	34.314
7.7126	32.786	37.638	26.848	48.31	31.924	36.568	27.623	35.283	22.291	34.119	23.096	35.331	23.305	36.721	34.929	53.089	38.06
7.8763	19.47	23.917	19.501	30.999	21.063	21.644	15.744	23.849	12.253	22.232	21.133	18.053	12.603	19.222	18.439	22.804	19.613
10.538	14.401	29.091	22.44	26.287	18.945	14.741	14.086	13.888	12.253	14.088	11.581	14.272	9.0297	17.37	11.89	22.804	13.539
15.779	133.35	96.257	105.69	143.66	117.92	140.78	104.06	128.63	93.869	134.26	67.044	147.06	85.757	139.67	106.09	163.69	150.35
6.2238	13.228	21.223	16.272	15.533	12.389	15.064	13.028	13.477	10.114	14.483	8.825	14.613	9.2751	14.364	17.735	15.185	14.378
14.981	61.493	80.173	58.248	53.072	58.149	77.585	75.365	60.309	42.794	50.775	42.405	55.499	34.636	58.152	41.215	59.587	51.167
9.7489	222.36	176.79	186.94	211.45	213.82	212.94	199.35	275.3	165.58	216.95	123.38	239.69	143.71	235.14	158.6	281.24	207.36
11.784	38.012	45.831	32.723	46.588	33.693	47.594	29.616	42.229	28.042	39.917	18.931	42.604	26.019	40.936	31.468	43.347	41.889
12.766	12.249	15.797	15.815	29.653	13.427	11.775	13.212	16.321	10.307	13.098	11.037	16.216	9.6408	13.795	13.629	15.591	11.933
10.431	71.624	72.103	56.519	66.336	65.991	69.845	57.554	68.334	52.755	64.525	50.815	88.357	47.392	76.979	62.754	86.018	91.864
14.039	39.989	38.579	36.916	42.384	34.752	35.157	26.069	44.447	29.523	35.098	33.542	44.152	25.063	42.84	39.698	40.57	45.355
24.046	155.23	121.41	134.23	111.24	154.85	156.81	106.58	168.92	107.34	151.73	88.455	160.09	67.487	149.16	105.74	157.52	126.55
10.881	84.395	70.796	70.094	114.04	81.421	90.52	69.631	91.306	55.235	86.845	41.221	96.596	51.207	91.733	62.045	88.712	88.098
13.667	27.657	25.828	22.19	60.175	22.654	29.041	15.755	48.627	17.261	23.411	25.688	30.109	22.4	32.431	29.257	27.556	23.862
13.234	14.57	23.693	19.078	21.804	13.441	10.342	8.4911	18.3	9.7293	13.037	14.52	15.494	10.343	37.391	13.201	15.816	13.21
17.579	17.931	19.129	17.791	18.538	17.669	17.965	15.053	15.225	12.974	21.263	15.885	19.412	11.149	37.806	21.113	23.264	19.758
6.9259	14.668	24.574	9.9698	17.316	13.332	21.069	18.907	19.418	10.925	15.179	15.885	19.701	11.747	15.669	21.836	13.938	13.673
9.9881	100.09	115.73	73.36	67.729	92.266	106.63	85.144	107.66	64.275	92.071	64.392	100.9	69.018	104.74	79.258	100.56	108.17
6.6383	60.832	53.636	44.07	48.695	55.235	61.72	56.619	55.078	46.763	63.671	44.011	75.974	43.109	70.266	52.916	85.321	72.2
8.2276	60.832	54.107	52.95	65.782	55.906	61.72	56.619	55.078	46.763	66.012	30.359	75.974	43.109	70.266	52.916	85.321	77.642
35.926	227.7	265.13	161.54	205.89	210.3	226.61	160.23	248.42	158.43	210.73	108.54	244.54	142.7	244.01	183.13	302.32	228.47
30.677	124.92	129.28	90.247	133.59	120.74	113.19	109.31	120.59	83.024	111.97	80.621	135.53	96.468	129.24	97.82	145.57	110.5
63.514	142.28	108.97	121.27	129.63	141.89	136.67	125.64	162.18	109.71	129.17	133.83	158.6	110.34	160.21	107.45	177.2	141.37
31.062	186.65	145.54	144.92	175.89	147.54	177.55	134.16	209.2	120.18	167.93	128.87	191.45	122.11	174.41	147.11	191.98	195.79
12.446	282.84	314.02	211.03	256.32	270.97	276.14	239.16	254.31	220.19	265.77	128.87	297.42	186.49	299.59	192.07	339.73	261.48
11.511	87.537	86.515	73.732	86.214	87.859	98.34	95.596	86.873	84.885	63.413	32.138	101.44	83.204	85.24	78.107	73.354	83.269
9.5357	14.999	23.247	23.917	34.505	28.96	17.561	17.617	22.431	15.282	12.899	13.007	20.713	14.189	15.221	16.834	28.209	17.932
9.4541	46.802	41.905	43.765	57.926	50.249	41.187	42.007	47.446	30.444	43.802	32.375	49.311	28.971	46.945	30.773	63.152	46.024
8.3468	12.06	33.979	18.706	13.555	19.812	10.932	17.264	18.349	13.744	10.95	20.711	13.51	12.616	14.093	10.936	16.316	15.507
10.063	17.138	25.006	38.269	24.95	20.619	16.534	14.917	30.153	13.877	20.091	20.711	17.384	8.935	15.396	10.905	17.905	19.063
13.041	18.084	37.759	37.967	18.241	22.269	18.354	14.917	27.204	14.403	21.438	15.573	17.766	11.317	20.22	27.202	21.62	17.599
24.532	251.84	188.41	207.52	305.07	228.45	283.62	232.88	266.37	190.59	258.23	163.19	283.16	167.94	242.12	235.67	237.8	243.48
12.388	263.13	207.67	227.04	241.06	256.92	261.29	183.07	268.94	186.76	262.44	143.46	284.36	163.78	271.64	202.08	302.51	262.75
18.3	339.85	301.14	285.86	300.61	339.88	274.64	313.04	315.2	259.59	314.12	191.89	354.75	208.5	356.84	251.86	384.84	317.2
16.445	346.85	322.77	298.84	374.08	286.67	371.29	257.42	346.71	264.95	370.38	210.29	323.69	179.85	358.02	225.23	344.52	343.08
19.418	73.517	58.567	88.435	72.213	73.339	68.795	61.631	76.207	54.867	70.91	53.801	79.51	43.518	70.913	48.185	109.32	69.129
16.664	527.19	428.49	448.01	426.99	522.75	513.93	448.45	495.03	398.35	536.3	276.48	571.92	331.64	537.87	406.46	598.5	501.7
15.935	175.31	222.79	151.56	182.35	197.02	178.04	125.12	173.53	140.57	172.55	107.27	188.38	108.04	189.6	133.52	175.82	173.55
15.935	112.21	120.98	84.579	165.04	93.336	136.57	88.398	118.56	92.021	114.92	60.068	136.83	67.509	114.63	77.837	125.36	108.87
16.51	178.92	183.8	146.33	177.7	164.44	195.09	138.68	179.77	124.09	170.62	93.687	191.03	85.243	163.2	107.1	165.56	175.32
16.51	225.46	279.96	217.87	213.53	294.46	229.13	226.35	238.16	165.68	242.77	107.2	255.33	121.83	222.16	131.01	264.32	193.15
11.045	231.69	290.38	190.91	199.03	212.69	212.95	180.7	226.6	172.26	224	125.41	247.5	141.27	249.04	178.45	264.84	224.38
20.059	121.49	106.97	92.639	139.26	120.21	117.68	102.84	132.83	96.63	113.05	74.184	131.38	105.28	142.88	92.353	155.16	112.81
17.444	103.08	62.918	83.435	123.5	77.23	117.68	82.947	132.83	79.058	95.926	67.318	115.58	87.839	96.029	79.83	124.44	106.24
31.747	133.78	74.215	158.92	108.88	219.36	159.85	176.99	198.76	127.93	165.74	89.58	125.97	38.907	122.01	66.861	79.287	107.67
12.303	28.046	50.662	24.077	40.191	30.262	33.907	21.759	30.296	18.939	68.103	27.907	26.886	22.439	23.255	30.843	30.51	28.613
18.866	235.47	219.52	185.54	197.58	199.4	241.58	181.99	217.05	149.92	237.5	130.52	247.89	164.82	239.46	196.98	249.06	261.42
14.611	271.37	237.8	231.34	246.23	247.58	277.36	229.11	268.33	197.24	266.18	150.66	285.65	168.94	264.2	196.98	297.53	277.41
16.188	203.89	213.16	179.68	246.23	174.05	182.81	159.65	196.1	137.05	186.93	106.9	204.79	128.48	193.64	151.91	197.58	181.36
15.894	47.587	95.554	49.517	49.311	65.295	44.035	39.804	42.15	42.265	42.681	35.341	46.426	41.47	65.915	40.472	55.892	46.593
34.09	57.949	61.779	62.406	63.155	69.1	59.435	83.898	71.593	58.225	46.883	31.031	57.681	45.095	65.915	46.055	55.892	56.836
18.453	58.664	59.243	49.654	64.643	79.292	68.645	54.285	59.178	57.31	56.778	26.484	75.161	43.762	51.187	37.943	54.673	47.509
30.135	432.44	382.6	398.18	354.35	435.23	455.22	323.99	460.16	297.01	427.85	201.37	468.99	259	448.08	308.71	468.87	396.21
55.198	551.17	578.36	479.66	492.14	511.17	573.31	464.78	576.76	383.12	493.76	333.96	556.54	344.41	557.47	357.07	475.08	447.06
24.87	377.26	331.55	339.03	346.44	354.67	370.28	283.89	368.68	256.68	358.04	205.74	393.44	229.82	387.78	296	451.33	363.11
14.56	466.04	423.58	412.3	399.28	495.32	535.88	345.87	573.47	324	440.49	254.71	499.91	232.64	442.59	306.2	468.61	410.28
14.677	169.37	211.48	142.97	202.31	181.67	180.89	132.18	185.37	109.83	174.75	101.15	152.06	96.873	159.3	123.52	146.28	150.1
38.223	229.34	264.1	192.64	202.31	211.04	234.22	170.36	278.94	156.48	288.27	146.49	225.67	134.2	215.45	193.12	241.32	221.96
27.948	280.6	305.51	218.09	240.19	288.97	278.49	205.8	309.24	199.68	277.78	153.68	309.04	159.87	279.33	219.05	317.06	276.06
11.761	105.5	84.655	87.457	105.27	100.86	94.45	85.993	93.871	79.224	107.18	71.703	105.03	66.463	99.919	72.837	135.8	110.84
7.4093	105.5	79.744	87.457	105.27	100.86	95.844	85.993	93.871	79.224	107.18	65.361	105.03	66.463	99.919	72.837	135.8	110.84
9.2028	16.874	18.696	17.713	18.163	19.253	18.542	19.059	14.349	20.871	15.279	22.856	23.564	10.14	17.755	13.916	35.068	18.265
39.646	104.61	120.14	92.277	108.75	106.22	109.62	90.217	111.44	63.61	109.62	74.214	96.146	60.611	89.345	67.315	98.916	101.56
18.214	315.03	271.94	280.06	327.32	362.6	285.05	257.96	304.79	220.85	349.32	164.28	321.28	188.75	342.13	200.82	347.44	262.04
28.726	313.16	263.38	292.51	353.37	326.89	339.07	271.42	314.59	223.37	287.43	154.66	337.19	188.47	310.16	240.78	335.39	342.77
27.828	142.56	123.73	170.65	141.42	135.74	142.54	112.35	160.66	104.96	117.54	72.369	172.63	95.737	134.39	102.57	208.55	93.343
9.277	138.42	133.06	130.41	131.51	139.3	148.24	127.69	145.01	106.74	130.14	87.394	141.93	78.921	125.33	101.82	160.83	95.132
9.2676	28.386	35.751	29.612	42.444	37.842	29.804	27.707	33.869	22.017	29.647	15.995	36.638	21.885	31.254	22.744	36.885	35.113
8.5491	13.795	28.426	14.77	22.509	17.91	22.275	15.793	13.87	9.4882	21.679	11.075	16.185	8.302	14.484	11.584	17.984	14.897
10.248	119.97	166.44	107.45	128.49	133.34	120.94	91.065	128.09	76.865	113.89	88.108	111.17	63.884	114.32	80.295	117.67	110.07
12.739	29.157	39.099	26.894	37.274	26.617	34.07	20.223	28.687	21.383	26.746	38.703	35.639	20.606	30.534	29.017	39.98	33.186
14.064	29.157	21.946	25.866	36.09	26.617	34.07	20.223	29.044	21.073	26.746	22.936	28.003	16.362	30.534	22.403	32.816	33.186
13.137	28.082	26.994	26.75	48.447	23.036	32.979	25.725	32.997	19.113	25.278	26.969	29.026	20.045	27.838	25.393	37.166	28.149
10.351	246.97	237.17	210.2	206.97	214.06	216.81	175.74	246.86	168.26	237.32	120.71	275.38	141.25	272.67	182.85	278.89	249.42
17.875	339.97	300.92	269.7	339.95	314.97	308.31	256.2	336.06	231.3	317.44	183.42	355.95	206.91	368.79	253.98	355.86	344.32
20.66	350.74	300.92	275.72	286.15	314.97	346.18	265.73	336.06	243.71	331.87	183.04	378.36	228.26	371.5	250.68	412.21	334.54
20.66	161.93	187.56	130.1	158.78	142.89	162.09	171.57	171.39	123.57	157.65	101.21	172.17	104.57	160.65	130.38	180.12	170.14
26.922	274.09	251.73	229.58	199.14	298.53	263.22	227.34	297.08	191.79	341.81	156.55	278.66	129.79	276.23	130.38	276.65	214.81
17.224	221.17	251.73	201.69	212.28	219.63	294.23	218.38	240.32	164.08	227.6	110.59	235.35	135.08	239.68	139.34	239.1	250.83
22.62	306.32	281.15	235.57	273.99	283.81	322.89	247.02	331.65	201.42	287.64	181.91	331.69	163.4	282.63	198.38	305.71	350.59
16.847	271.99	249.19	211.63	255.61	241.44	281.72	188.03	270.91	178.81	271.34	155.91	300.02	181.79	270.85	202.06	309.85	279.56
22.875	137.11	132.79	101.51	111.5	105.62	148.61	84.412	140.38	93.331	137.98	81.382	165.87	88.662	140.13	128.04	188.39	156.94
22.359	182.12	168.04	135.88	163.78	181.21	177.74	159.68	184.95	140.91	217.39	109.58	207.98	104.81	198.5	110.04	223.2	178.51
24.746	163.18	158.52	130.93	177.61	161.1	145.71	140.69	162.92	122.95	161.53	109.58	190.95	113.08	166.69	126.02	171.98	166.27
20.124	160.73	158.52	124.18	139.33	161.06	171.31	122.55	158.53	114.91	133.22	73.56	190.95	107.83	184.32	112.24	164.77	143.21
9.3253	168.5	171.61	120.31	155.21	148.87	170.19	146.56	176.22	117.81	133.22	96.801	178.4	107.83	175.34	117.14	193.97	167.84
21.01	211	260.12	160.15	184.01	175.71	189.23	157.28	188.34	147.76	196.7	161.75	219.06	153.1	217.73	152.11	241.89	210.75
22.803	211	217.65	160.15	184.01	175.71	189.23	157.28	188.34	147.76	196.7	168.55	219.06	153.1	217.73	152.11	241.89	210.75
22.803	135.91	174.19	97.714	106.88	152.97	151.04	115.29	153.56	107.19	132.16	89.161	150.9	98.218	129.56	99.464	149.22	141.62
17.297	199.98	210.38	169.1	190.48	221.14	201.77	162.37	218.92	151.59	188.69	80.767	203.12	125.91	204.23	150.14	238.51	208.2
26.61	45.192	77.522	37.461	46.71	46.61	39.347	34.111	51.592	29.468	39.616	30.717	43.197	29.674	43.624	43.753	38.87	44.653
26.06	106.64	157.58	107.34	110.53	114.18	111.45	94.084	120.8	79.769	95.345	53.122	117.06	55.325	94.312	60.286	115.46	83.703
25.789	112.12	144.56	93.377	104.62	102.39	107.66	77.536	120.59	83.907	118.75	63.107	119.29	73.667	102.22	83.081	138.22	116.78
36.074	87.09	95.302	68.827	110.59	81.511	95.118	63.555	84.426	57.445	87.089	59.003	88.139	69.333	95.987	71.869	113.3	93.386
31.226	47.94	85.398	68.827	31.134	55.625	43.987	39.337	45.39	28.192	46.486	30.916	43.11	31.359	44.283	33.551	46.546	40.841
42.022	38.098	43.498	38.397	60.032	47.396	47.428	39.359	41.708	28.978	45.259	24.829	44.076	22.75	35.963	35.888	47.066	37.407
70.911	105.42	122.44	86.634	122.58	104.64	101.36	93.404	101.62	71.873	113.91	55.042	99.199	69.795	115.45	75.415	161.6	95.791
78.89	162.19	152.56	143.79	165.46	151.35	146.5	146.41	142.89	106.92	168.47	103.47	168.55	111.59	182.35	148.83	161.6	169.02
39.507	308.42	289.67	265.18	300.83	268.37	318.23	234.05	292.72	188.75	328.19	209.59	333.13	214.43	336.92	273.47	371.36	301.93
21.268	164.7	120.38	143.13	191.35	174.74	189.31	133.61	148.13	143.16	180.68	132.59	171.33	124.75	187.44	155.87	199.73	178.27
23.71	60.653	103.1	56.774	49.482	105.94	98.35	53.475	76.359	43.443	73.096	54.432	57.787	51.425	66.256	76.026	47.96	82.599
17.98	261.61	215.44	232.68	241.66	260.42	260.48	199.62	274.69	180.87	251.29	153.35	303.17	163.72	260.19	191.12	275.9	263.89
15.494	244.72	324.13	208.42	212.21	219.49	260.48	172.72	253	165.07	231.9	156.48	251.96	149.52	252.5	240.48	252.39	285.71
14.491	327.96	269.27	251.12	314.73	297.93	336.1	254.86	319.92	226.32	320.66	182.11	350.34	210.48	326.71	252.29	368.47	333.4
32.325	506.1	355.49	407.84	459.14	454.44	485.92	380.8	520	350.72	479.51	276.47	552.92	306.09	491.87	389.45	561.42	518.55
36.024	346.57	241.75	327.48	277.92	311.21	382.22	277.75	391.44	258.2	330.16	209.88	343.02	202.44	355.72	307.23	340.86	352.59
29.583	195.73	269.03	152.48	170.32	185.7	200.11	168.85	184.17	125.05	187.48	102.75	220.49	113.86	199.37	153.98	226.37	204.66
29.583	432.31	371.86	339.91	397.83	383.44	425.91	333.97	421.14	422.83	405.09	246.69	472.64	287.16	444.35	342.24	502.39	461.03
47.833	335.8	339.56	262.38	297.54	278.78	361.51	233.18	328.96	447.75	333.3	216.81	356.81	226.98	368.6	296.69	391.85	369.61
27.679	273.07	339.56	247.07	228.01	237.56	263.28	227.54	242.97	212.63	220.66	147.78	326.51	160.45	257.67	205.77	269.18	252.88
30.466	197.95	207.54	143.44	232.75	178.19	211.19	151.61	183.42	142.33	185.49	157.52	223.95	133.44	176.04	127.33	193.86	187.43
13.066	253.64	308.03	154.9	216.77	231.64	229.31	184.09	257.88	174	237.63	123.49	265.47	155.64	248.56	175.55	275.56	225.2
24.621	253.64	232.31	202.72	235.19	232.72	247.8	206.18	255.53	186.72	247.16	156.13	281.78	173.63	248.56	180.04	275.56	225.2
20.993	226.45	197.6	206.35	194.48	209.69	237.6	188.23	226.46	157.72	214.7	132.8	251.3	142.64	227.8	190.45	252.19	232.85
28.176	247.26	223.96	191.12	248.41	215.36	271.26	180.68	241.49	178.06	237.8	156.69	267.81	165.48	250.88	204.72	253.05	262.61
20.463	173.23	144.28	133.14	184.44	160.1	182.48	136.89	170.28	153.37	163.48	106.35	194.26	112.24	192.41	151.57	209.97	198.69
42.564	180.89	192.44	147.17	191.94	186.87	189.43	150.88	238.73	150.8	162.26	136.03	197.78	112.24	178.25	146.94	177.21	198.69
21.946	180.89	192.44	189.93	202.36	225.39	189.43	156.14	227.39	80.308	132.98	119.74	216.24	84.582	144.95	146.79	169.86	174.13
22.973	153.51	115.47	144.42	154.75	172.96	154.19	154.55	155.81	134.91	154.08	75.48	200.53	94.903	159.65	102.29	183.79	158.25
24.027	152.52	123.17	144.42	141.88	164.49	142.02	161.75	150.97	134.17	144.3	75.48	171.57	94.903	159.65	102.29	183.79	147.9
29.813	82.396	73.993	88.544	81.186	69.954	78.786	71.602	90.011	61.331	76.174	59.38	87.053	51.671	86.803	60.056	92.154	84.51
29.055	183.59	175.48	144.79	173.79	170.4	181.92	149.26	173.5	135.23	175.62	100.08	187.1	131.86	172.47	150.42	202.46	187.66
28.494	74.725	125.83	62.811	56.662	69.305	75.275	71.388	96.469	54.903	60.413	64.889	74.878	46.334	68.46	52.553	69.775	82.039
21.496	34.82	39.839	31.68	41.03	40.786	33.547	38.712	37.676	32.885	43.688	22.849	41.571	22.53	40.756	32.851	47.702	33.887
16.11	62.117	120.39	46.276	44.394	72.361	71.866	51.619	75.467	38.381	101.95	33.572	60.227	40.714	57.222	48.737	62.193	77.907
14.883	41.647	72.856	40.661	32.73	49.377	48.232	37.673	46.575	36.795	40.232	24.126	50.695	25.148	41.085	33.414	48.425	45.233
14.742	52.866	63.473	45.157	68.109	51.645	53.674	50.398	58.406	36.838	59.516	35.052	56.063	38.37	51.568	48.478	56.22	55.789
18.138	50.443	57.948	49.529	40.384	49.501	53.674	40.732	58.406	34.454	59.516	32.44	56.063	38.37	51.371	48.478	54.339	55.789
12.084	27.473	30.775	23.107	27.172	29.067	35.864	23.562	30.899	19.359	27.892	21.011	31.626	19.649	31.378	30.341	33.329	31.871
13.158	32.3	30.775	42.674	47.964	35.347	47.169	21.878	37.965	21.103	33.539	21.458	31.866	20.576	37.419	31	36.648	34.56
13.643	67.253	74.909	64.524	76.514	63.816	67.191	50.816	80.243	45.92	65.588	64.452	65.062	38.859	66.192	52.942	63.413	53.854
7.9589	23.512	37.945	26.805	26.267	27.818	26.312	21.467	29.23	18.909	25.315	18.541	29.304	16.062	25.061	22.026	28.114	37.018
10.38	44.74	60.393	34.204	61.827	41.917	42.983	37.124	43.96	31.702	42.953	27.277	50.116	31.386	47.111	34.741	50.276	45.64
13.547	48.057	49.161	37.402	63.777	42.036	53.435	37.124	46.371	32.039	50.218	30.77	50.481	34.836	50.312	43.867	64.654	55.956
19.748	77.296	92.531	72.444	69.062	78.239	79.273	52.492	80.687	52.378	72.724	58.175	72.242	68.655	85.05	105.16	94.155	102.29
19.748	85.212	92.531	72.444	91.32	81.211	96.16	67.013	90.883	58.009	88.829	49.309	102.92	68.655	93.819	105.16	97.771	102.29
22.157	74.726	126.49	73.711	71.727	87.708	76.962	54.899	75.097	45.824	77.346	73.76	75.178	50.85	201.18	86.732	90.029	119.72
37.448	74.726	106.92	49.467	90.797	77.223	76.391	50.233	77.014	51.277	95.158	57.739	75.178	50.85	130.32	86.406	77.019	117.51
24.266	287.69	260.92	216.63	281.85	239.23	273.43	207.71	291.49	188.51	260.4	144.01	308.57	201.6	311.21	239.68	318.5	323.9
25.454	65.994	109.85	55.204	68.645	57.313	68.83	49.47	73.322	45.542	89.717	44.347	72.463	46.954	59.068	51.89	68.775	63.453
13.517	15.293	22.212	20.537	17.578	20.168	20.569	19.449	17.067	13.444	22.997	17.038	35.761	12.122	14.16	14.901	16.603	11.758
32.805	52.647	67.864	46.266	57.729	59.512	86.873	43.703	60.39	43.696	48.72	32.956	55.658	45.329	53.649	27.206	42.447	39.25
30.61	37.46	45.742	41.055	40.328	25.692	75.932	39.557	49.967	43.696	32.633	30.545	43.598	17.694	28.097	23.884	36.142	36.598
29.345	72.183	206.6	66.5	41.137	80.458	75.932	55.852	92.015	42.432	64.674	87.14	74.333	50.758	42.042	75.974	45.449	60.666
28.173	16.032	18.231	33.03	23.028	17.243	21.182	14.503	22.609	21.402	20.227	17.721	22.028	21.535	18.93	37.904	20.269	25.002
30.068	28.369	30.318	28.369	28.796	22.027	25.095	24.296	44.788	23.658	32.261	20.701	29.33	18.148	18.93	21.747	15.46	29.276
27.355	31.532	19.583	42.664	36.233	31.969	31.822	31.435	32.183	27.235	20.268	16.75	36.29	15.893	39.428	18.442	32.958	33.174
20.089	36.704	108.17	42.664	45.724	31.969	34.601	31.435	34.915	27.495	35.518	34.026	39.733	32.469	39.428	26.368	42.875	36.848
22.376	22.082	26.896	18.402	53.778	18.615	23.136	19.728	22.156	15.677	19.886	15.99	23.465	17.024	21.201	22.048	27.25	30.296
22.559	16.69	36.526	14.784	16.574	18.615	21.154	18.633	24.539	14.666	19.886	31.23	20.002	17.024	17.376	22.048	21.615	20.379
60.505	80.254	95.456	81.578	75.551	85.523	78.086	59.714	92.175	69.124	60.979	67.863	80.411	57.78	63.926	72.68	75.782	79.033
26.349	39.868	42.687	47.603	50.86	33.706	43.932	47.372	28.062	31.567	39.035	29.857	53.341	35.37	54.345	21.071	30.639	22.486
29.352	33.916	35.223	22.621	38.574	27.589	38.08	37.204	30.565	23.089	35.036	29.857	27.722	33.604	67.16	47.028	32.849	59.98
35.223	32.519	41.128	26.801	29.498	28.777	29.157	25.828	32.243	24.134	37.254	19.814	37.1	36.25	35.953	26.827	37.903	43.473
29.035	26.246	20.589	26.801	23.223	27.405	23.337	23.157	24.374	22.387	28.237	17.597	30.156	24.478	29.252	25.619	33.759	29.17
38.38	38.815	36.328	41.463	38.314	34.644	39.766	26.241	45.506	23.845	42.691	27.709	40.364	31.937	32.254	34.251	38.25	51.292
18.614	46.212	62.844	44.559	43.669	39.778	63.529	32.05	51.373	33.782	54.898	41.367	43.737	30.01	36.996	48.916	38.276	41.919
24.976	32.667	62.314	26.208	41.796	26.048	31.262	24.916	35.867	18.894	40.905	41.367	32.142	31.826	30.409	38.239	32.091	37.059
47.371	29.7	51.111	21.748	46.228	19.867	25.663	26.701	23.523	18.855	24.086	31.112	32.489	33.859	35.735	46.463	23.006	37.008
23.121	33.37	34.085	26.62	37.779	28.489	32.182	38.456	30.044	30.165	37.903	21.285	48.215	60.253	38.101	36.958	38.068	33.08
27.531	35.993	33.697	40.865	38.003	44.59	33.776	43.065	46.814	34.391	37.903	24.372	50.656	26.44	38.855	36.958	45.081	33.08
43.084	80.793	120.4	62.54	80.196	96.452	78.644	77.026	98.511	69.58	75.074	50.406	105.79	88.85	66.631	60.31	76.03	60.625
43.084	27.11	63.279	22.417	31.747	29.627	32.475	21.139	33.496	16.07	28.232	16.665	24.209	20.024	25.548	21.156	25.994	35.759
27.674	24.552	36.627	44.937	34.088	32.669	28.716	19.307	28.385	29.697	24.463	22.95	33.307	26.162	25.554	16.584	24.965	28.741
42.89	46.916	45.305	63.616	58.216	34.92	63.37	32.258	45.673	29.697	41.471	34.198	40.032	36.782	26.72	32.807	35.515	56.393
45.799	81.826	90.428	86.276	102.38	77.683	105.44	77.733	86.76	72.836	75.798	64.534	105.92	69.887	84.783	67.003	63.467	65.132
35.838	38.295	39.363	36.461	36.069	38.695	30.648	33.182	50.898	31.864	45.739	22.415	47.615	35.169	52.025	36.68	45.465	40.874
57.499	43.44	50.863	37.607	39.315	41.269	39.067	38.606	39.736	38.013	41.131	25.614	58.641	31.556	52.03	34.801	52.84	40.254
33.594	32.123	34.893	35.382	27.622	29.732	29.054	32.984	30.096	32.924	29.249	14.914	43.894	30.985	29.628	26.131	30.722	31.264
54.157	36.555	44.58	41.644	40.311	29.046	47.815	36.113	47.001	33.768	30.708	23.164	32.42	28.038	29.946	38.887	30.722	44.513
35.831	47.972	34.059	50.884	49.738	40.468	47.077	46.253	36.653	38.767	44.447	25.918	53.228	38.364	47.455	36.546	42.093	46.602
19.354	27.051	30.846	28.226	32.596	21.107	18.827	24.443	34.752	21.872	27.778	15.203	28.235	26.012	35.675	23.129	35.39	21.77
28.917	30.573	57.728	28.226	32.596	26.894	25.793	27.625	34.752	24.652	28.507	16.151	31.951	31.592	35.675	24.876	33.629	30.282
33.641	55.091	123.88	43.583	58.201	53.089	49.205	45.234	60.377	31.227	52.375	35.326	68.093	58.066	56.199	60.717	45.42	59.156
26.55	57.469	116	44.107	74.739	51.026	46.148	45.234	49.252	37.626	43.719	54.322	64.619	56.421	73.015	37.289	45.42	38.905
34.631	58.234	72.763	39.74	70.973	49.498	57.337	56.519	70.878	45.761	46.696	55.878	51.275	56.421	56.243	50.853	39.151	54.323
41.046	59.854	72.763	51.606	65.523	59.541	41.058	52.953	66.825	34.859	42.166	50.136	52.435	48.736	55.723	54.894	53.934	50.86
37.21	43.737	51.927	69.792	44.4	67.676	36.526	36.023	61.644	38.24	27.197	33.033	51.967	25.176	27.372	28.003	33.685	42.014
32.051	31.123	44.877	22.306	37.707	34.977	32.607	21.869	44.517	28.019	27.79	27.569	35.967	25.625	30.067	27.744	28.702	39.454
49.99	39.664	44.877	48.103	37.707	39.761	40.256	32.837	44.517	31.797	56.799	29.074	39.592	27.526	41.738	37.089	41.544	51.023
35.683	39.664	39.108	35.443	33.533	39.761	40.256	32.837	40.546	26.624	39.789	24.374	39.592	27.734	34.947	37.089	33.037	40.815
37.427	59.616	69.473	100.18	59.424	59.807	71.184	42.354	91.189	41.933	54.953	50.926	58.533	38.729	51.58	50.713	53.994	50.023
38.48	54.894	64.978	85.489	55.776	49.707	54.885	42.174	54.298	43.924	54.075	34.284	48.585	55.273	68.274	44.145	44.011	48.897
44.895	57.221	73.834	70.101	65.003	49.707	55.604	56.925	52.493	43.375	57.777	37.617	63.89	63.334	58.784	55.422	58.832	66.631
44.384	38.445	51.273	37.805	38.674	37.164	36.625	39.827	41.132	28.314	36.717	30.953	45.759	52.966	38.898	31.871	44.194	41.293
72.382	69.435	68.106	51.498	68.01	63.447	69.88	43.837	88.383	43.681	76.828	39.558	60.035	52.966	69.114	57.627	62.218	67.756
45.995	51.536	60.33	34.668	60.653	48.758	58.279	43.665	54.256	35.48	54.106	45.176	52.203	50.424	48.452	46.585	50.026	40.526
39.046	37.757	35.736	33.196	44.106	35.265	41.664	24.173	46.164	23.707	38.886	34.587	36.777	28.842	34.44	27.735	35.627	36.22
63.168	43.864	47.763	29.517	44.594	34.769	50.686	33.758	49.005	31.224	34.63	26.641	38.439	40.613	42.505	32.856	43.02	52.023
79.976	85.209	83.634	71.155	80.662	72.782	103.39	64.859	105.68	65.873	71.27	56.06	109.22	54.991	73.423	62.402	78.36	82.064
40.844	66.974	93.878	43.113	77.221	47.027	60.732	50.426	70.967	51.903	53.266	51.475	73.541	54.991	50.564	37.943	52.756	49.723
45.961	31.004	27.851	29.979	25.181	38.13	30.441	28.152	28.447	24.246	33.996	20.424	30.575	27.034	33.823	33.284	39.941	39.19
19.186	25.037	19.196	26.88	19.139	25.479	23.551	20.763	24.467	21.719	20.936	14.123	26.524	24.885	33.815	22.197	28.495	23.028
32.158	52.157	49.822	39.163	52.491	44.15	45.653	40.337	65.291	40.836	34.265	32.922	41.795	44.114	38.084	36.495	29.22	30.627
70.38	41.056	35.696	32.515	48.849	43.514	41.647	28.159	46.168	22.676	36.781	24.581	50.324	38.445	32.064	34.629	30.549	37.731
111	54.639	65.303	35.99	72.763	44.276	53.519	53.634	48.074	35.761	50.217	34.94	69.031	81.844	46.812	42.8	67.092	50.713
31.023	19.515	26.294	40.148	21.914	22.231	19.991	17.341	26.511	14.545	18.544	13.814	22.117	34.403	19.888	23.002	20.296	25.381
25.344	31.531	19.604	38.563	39.848	33.392	45.172	49.069	35.276	31.436	17.854	17.71	51.817	27.687	23.924	22.21	22.563	28.482
93.647	54.9	55.395	53.245	52.439	57.744	58.15	42.498	69.698	43.972	45.01	48.862	58.043	38.003	52.126	41.689	51.426	48.324
43.944	31.408	39.512	37.673	27.659	40.17	31.102	25.717	34.057	26.854	37.771	24.463	43.629	27.023	48.232	30.784	43.66	34.056
38.87	45.08	65.973	42.486	53.869	28.832	30.448	39.017	32.596	30.246	47.166	25.531	47.48	61.337	52.612	43.339	41.492	42.087
43.569	36.965	65.749	33.797	47.347	29.882	30.375	31.657	40.909	20.127	47.744	26.986	48.676	33.113	56.153	25.706	36.184	27.609
41.107	32.924	43.988	39.648	38.323	30.763	27.767	32.204	45.424	22.233	36.36	28.734	44.646	34.662	27.868	36.418	38.769	40.693
38.542	32.4	32.71	35.249	32.159	28.484	26.781	20.902	27.348	21.419	32.168	20.859	31.845	30.989	32.642	32.536	33.249	39.669
43.578	32.499	54.143	42.925	34.969	28.484	35.258	22.907	33.513	21.419	44.231	20.078	36.631	34.911	32.278	35.27	39.591	40.857
34.4	44.209	51.453	35.757	51.029	37.429	38.627	37.675	49.725	28.791	42.248	46.447	52.434	36.45	41.87	42.14	34.411	35.297
51.718	53.598	60.73	58.552	66.098	45.24	57.341	51.672	55.499	38.997	53.667	39.108	59.042	39.304	37.438	45.84	60.183	41.286
41.238	46.881	46.42	58.552	45.221	42.496	70.141	33.009	55.942	32.79	50.291	34.988	59.951	78.083	54.325	40.883	48.308	55.954
73.74	67.344	85.044	52.872	85.836	56.167	56.717	46.93	67.177	35.821	79.429	66.374	52.888	43.183	40.481	55.282	56.223	66.364
26.448	25.175	32.331	27.585	30.141	20.451	22.446	21.125	24.674	17.921	25.706	24.308	32.144	31.222	24.793	22.597	27.928	26.182
39.318	22.454	28.617	23.514	30.141	15.539	22.397	20.745	20.214	13.622	21.098	30.168	22.625	29.521	20.585	22.635	22.252	21.173
94.648	42.271	64.552	32.11	49.897	33.262	51.881	45.756	67.118	31.417	48.333	33.039	45.711	63.565	40.636	48.707	42.259	61.233
54.066	40.59	41.738	43.119	42.236	33.328	44.608	32.699	45.85	32.079	40.762	24.592	62.898	32.042	43.102	27.339	39.036	51.234
38.276	42.888	41.738	42.364	49.028	33.328	47.311	32.699	50.384	32.079	44.186	21.313	57.159	32.247	34.921	42.529	35.846	50.59
50.456	46.895	57.344	58.394	43.144	39.855	46.694	49.119	47.123	32.087	47.893	36.353	43.539	42.474	55.345	45.85	44.816	49.57
32.802	30.427	26.159	31.449	36.645	25.753	23.197	28.159	31.098	20.755	27.053	20.841	29.579	19.758	30.926	19.82	33.933	34.073
39.464	26.914	36.227	23.671	25.034	24.962	27.751	24.213	31.301	22.718	29.765	16.508	25.381	27.99	24.238	25.1	28.448	34.742
21.814	59.105	92.656	39.743	84.155	36.995	89.508	67.99	54.341	38.961	35.518	59.243	65.449	99.642	49.858	41.731	46.785	52.587
30.163	39.749	40.267	28.753	42.096	22.316	37.231	38.822	36.961	25.296	41.79	27.326	38.524	45.533	23.649	32.095	23.966	44.275
46.915	44.777	44.631	40.216	44.981	34.912	42.74	53.606	38.858	32.697	54.882	30.979	46.577	45.06	34.94	44.624	36.941	44.275
46.37	38.692	42.313	38.056	30.347	35.525	34.149	41.111	38.858	31.737	40.837	23.754	46.577	28.384	54.552	26.663	41.865	31.551
71.018	74.889	72.704	63.439	67.77	58.9	62.001	46.755	104.19	49.416	72.916	57.946	60.844	59.423	58.592	71.662	62.788	65.8
43.502	52.396	48.81	50.028	44.68	58.852	53.868	39.119	54.755	42.431	53.504	38.275	55.402	35.907	44.537	46.414	44.604	68.318
32.7	43.643	47.26	42.17	46.741	36.924	49.307	33.189	44.756	27.244	40.741	40.874	36.777	35.07	38.93	43.802	47.386	45.052
56.33	73.472	93.167	101.28	67.476	94.721	80.787	72.464	97.097	71.249	72.537	67.083	87.271	48.709	77.435	45.389	66.583	54.396
46.235	43.338	57.474	58.356	57.697	40.567	35.059	30.009	48.87	30.484	38.646	40.003	46.509	53.342	42.69	35.343	36.94	27.655
45.262	35.701	38.363	43.08	44.192	37.623	35.059	38.782	40.951	23.588	35.435	23.211	57.764	43.447	57.347	35.343	41.624	30.039
33.458	37.845	61.113	30.146	44.492	35.826	29.562	33.721	25.267	25.803	34.77	43.155	34.449	23.596	37.254	31.045	34.712	31.384
33.458	37.845	61.113	38.947	44.492	43.814	30.246	39.132	39.344	27.242	31.084	39.869	45.761	23.408	37.254	19.645	46.084	30.818
79.948	72.621	92.269	77.277	63.196	72.321	84.495	55.841	82.451	52.442	78.848	41.905	60.471	54.263	86.117	58.24	72.145	96.197
49.315	38.102	42.755	46.172	37.765	36.541	54.845	55.841	56.074	52.442	35.563	42.161	46.257	65.944	52.413	40.933	44.876	33.464
72.727	79.005	100.63	100.51	92.476	65.177	64.804	64.459	85.447	49.016	64.311	63.9	70.721	55.15	60.934	67.571	70.186	58.549
31.25	70.597	98.083	71.035	78.407	75.929	65.338	64.459	77.188	37.415	56.8	57.983	67.097	56.819	47.898	61.331	49.313	58.549
35.909	33.791	59.328	39.241	51.114	30.472	29.57	44.806	31.46	32.583	31.577	30.51	35.217	38.571	25.44	30.676	27.566	38.286
56.273	54.405	55.505	97.365	56.375	54.779	47.292	40.64	50.421	30.881	43.053	34.843	48.364	35.328	48.186	32.574	48.987	44.077
66.275	43.134	53.34	54.336	49.254	42.796	39.635	37.487	38.417	30.179	37.402	30.002	46.722	43.393	38.129	35.093	41.767	41.189
56.065	37.074	44.505	32.154	37.471	35.897	41.203	25.799	35.215	22.062	42.857	34.156	39.434	25.793	32.534	32.752	36.294	39.688
42.536	41.839	60.657	42.489	37.751	37.943	42.268	26.968	42.777	23.05	46.612	35.732	34.865	32.906	28.658	33.703	49.195	44.25
25.629	36.029	36.386	49.058	32.005	35.136	28.733	29.968	40.678	25.269	33.124	23.37	39.062	38.051	32.905	30.79	37.182	38.891
27.467	38.967	36.467	35.868	38.716	37.559	31.872	27.868	41.897	35.634	18.178	25.584	42.011	37.918	40.847	28.645	48.123	38.382
46.008	50.334	47.252	56.24	45.989	52.164	55.264	47.099	50.228	48.637	53.815	26.007	56.373	49.949	58.935	43.191	56.975	61
26.044	35.717	35.873	20.899	39.716	27.73	42.242	32.848	38.672	37.545	28.51	27.803	49.869	49.946	28.563	29.983	30.631	30.624
67.875	44.78	47.495	48.716	40.203	37.196	44.672	48.061	38.672	37.545	39.767	34.403	49.869	49.946	41.829	46.498	41.812	47.577
36.893	31.975	42.384	40.017	42.769	31.522	33.985	36.015	38.669	23.866	39.767	34.79	49.903	28.505	32.717	30.144	41.812	34.265
15.961	27.348	26.675	29.972	35.35	31.975	29.102	18.541	41.557	18.161	25.22	21.78	30.839	25.398	23.539	32.282	25.607	34.73
22.528	23.4	23.292	24.387	23.655	23.198	24.13	17.878	23.98	16.82	22.334	18.399	28.97	31.466	22.746	29.665	21.565	29.737
61.179	45.731	56.953	54.375	39.805	56.043	78.331	36.42	47.944	42.191	39.882	39.59	49.099	56.007	63.577	44.846	40.739	52.872
55.786	39.932	40.436	38.885	38.428	34.104	41.2	41.08	36.717	28.823	39.634	30.169	46.454	35.48	42.449	40.679	44.375	46.495
25.763	60.088	76.429	53.398	80.724	42.652	51.996	63.382	61.163	46.952	46.254	51.188	63.122	49.11	47.077	40.679	49.383	41.687
18.717	13.498	17.657	20.79	13.756	11.73	19.745	15.714	14.616	11.359	17.055	13.6	18.398	27.755	21.46	14.421	16.43	14.855
31.183	32.986	31.659	31.808	46.162	32.185	19.745	36.206	34.46	21.807	37.433	21.223	34.658	36.541	34.423	37.548	33.07	30.664
48.639	64.054	72.445	83.149	60.168	63.291	39.404	52.39	63.215	48.721	69.316	48.085	55.918	50.206	64.797	59.962	66.909	62.009
27.755	33.813	33.649	30.705	36.584	27.494	33.616	34.515	40.792	28.415	39.438	16.441	37.412	20.555	31.892	26.502	38.321	30
21.695	36.127	35.482	22.978	54.447	32.735	33.78	34.515	25.083	28.415	27.883	39.979	45.958	60.015	34.845	36.559	32.019	29.402
31.16	42.861	30.822	51.592	48.696	42.451	42.394	48.792	35.377	37.301	32.735	17.614	50.122	46.661	46.002	34.574	33.53	41.81
39.765	67.112	81.194	51.592	78.995	65.711	63.933	56.859	72.322	44.575	59.651	60.61	58.113	61.279	64.808	70.361	57.869	47.26
31.487	68.169	109.82	42.468	80.997	40.2	47.824	71.797	45.937	45.291	50.209	61.512	78.476	105.77	56.542	70.361	52.705	47.219
36.445	40.152	46.146	62.988	46.57	57.781	34.65	35.071	39.483	25.335	44.91	24.997	46.022	46.122	42.527	31.856	43.293	36.339
37.951	70.165	102.48	76.224	75.932	66.995	67.513	62.63	69.915	52.741	53.965	49.379	84.932	67.324	68.155	47.208	58.557	48.365
42.778	45.182	50.495	35.738	38.411	42.252	41.002	32.029	46.279	30.018	46.338	33.985	48.771	34.733	49.125	35.972	45.222	46.192
42.778	45.182	48.089	35.738	38.411	42.252	40.34	32.84	46.066	30.018	38.514	29.254	48.771	34.733	56.759	36.533	51.528	44.356
40.978	38.219	34.526	45.416	36.224	36.235	36.363	32.84	38.45	28.236	36.579	25.198	36.145	25.811	36.636	26.971	51.39	35.263
44.455	40.967	52.015	59.106	39.93	41.723	37.317	32.891	39.743	28.236	39.375	30.122	38.787	29.4	40.554	28.301	51.39	39.151
62.548	46.149	79.575	69.259	46.779	52.404	56.695	49.778	47.728	28.168	39.375	43.021	46.749	32.391	39.517	27.787	40.507	41.35
68.482	46.984	33.019	49.318	42.59	66.528	61.221	52.768	44.958	52.554	43.979	28.161	59.713	37.793	55.453	44.132	66.768	61.264
34.205	29.124	48.255	17.702	48.988	41.504	47.134	17.181	43.237	19.211	26.421	32.781	27.043	22.112	34.336	26.575	27.032	19.183
23.461	25.647	63.358	28.554	35.534	27.958	48.031	17.939	43.237	18.809	30.756	32.781	21.807	24.87	25.838	24.114	27.083	21.72
47.193	36.137	48.574	43.569	38.698	33.647	38.013	30.919	40.919	27.795	38.23	36.916	38.606	25.95	34.581	28.562	40.951	41.596
52.196	58.746	101.46	43.931	78.027	41.037	48.782	42.373	51.147	40.322	43.626	41.805	64.733	53.929	55.535	46.784	58.764	54.724
69.479	58.061	70.431	46.919	57.548	54.123	54.847	53.099	67.424	44.516	49.149	45.368	67.997	50.144	125.09	49.012	52.56	64.96
34.705	37.902	41.985	29.718	39.584	33.745	28.026	42.7	33.267	36.416	34.933	22.811	44.498	34.744	37.769	29.882	36.478	39.17
23.199	28.516	30.354	21.634	29.068	23.473	29.984	64.542	23.319	22.573	26.811	23.535	53.084	27.927	41.462	26.565	33.111	30.919
41.083	44.004	46.915	31.652	43.804	37.876	37.207	36.853	34.159	24.174	46.163	35.352	56.531	39.741	42.334	39.407	49.079	38.503
28.496	52.415	63.695	43.192	56.755	37.876	40.997	64.268	34.809	39.799	46.163	45.17	62.738	59.645	42.334	51.817	49.079	38.503
47.24	60.549	68.102	37.963	59.052	52.91	47.26	46.536	53.771	47.428	53.212	59.043	71.851	65.722	61.465	51.661	59.217	44.929
38.637	43.918	44.969	51.009	32.574	59.14	44.658	33.356	42.643	30.083	47.574	35.767	42.57	28.648	44.779	41.572	42.505	49.689
20.215	22.019	18.852	21.949	21.09	16.787	24.306	20.343	20.381	15.24	26.512	16.837	22.421	22.417	22.29	22.281	20.374	25.846
31.434	25.017	21.273	23.18	29.623	26.559	29.119	20.47	27.765	22.251	26.512	17.728	22.486	22.417	26.73	16.961	29.059	23.109
15.442	10.881	12.821	32.357	12.15	12.764	9.7541	10.916	9.1769	9.7238	10.01	8.8649	13.503	13.554	14.37	8.2522	13.974	9.9765
22.959	34.124	30.15	31.613	40.805	35.181	31.141	28.353	22.72	24.698	32.551	19.445	40.933	37.763	33.978	24.063	39.162	33.043
49.141	59.594	62.207	77.518	41.533	62.76	69.164	37.358	66.061	52.153	46.163	38.118	81.925	49.943	58.608	46.757	51.677	72.333
60.485	110.22	123.81	77.518	103.52	111.24	99.951	88.32	129.55	71.966	109.66	75.465	103.64	84.024	119.51	92.933	75.012	124.01
67.694	81.708	111.48	73.298	103.94	77.506	65.428	65.992	64.144	54.551	60.138	72.125	71.794	58.872	119.59	64.475	78.345	59.93
30.662	24.875	46.529	44.964	24.988	27.736	31.575	28.38	23.11	27.076	27.844	24.106	32.526	15.891	27.44	14.557	31.25	28.737
52.039	83.131	109.58	110.51	75.163	117.58	83.991	62.336	101.24	62.585	66.262	65.759	63.723	45.997	56.775	69.349	69.846	76.146
53.583	32.884	79.854	32.446	39.549	33.535	35.737	30.307	39.307	33.865	36.228	23.499	31.147	22.641	31.938	26.195	37.496	28.966
18.064	76.867	130.25	98.941	84.819	73.278	76.524	40.348	89.253	63.305	75.893	66.083	58.858	43.138	82.16	68.734	88.988	76.032
29.336	59.546	87.344	51.78	39.779	59.719	68.28	58.342	57.269	55.026	65.468	41.248	55.173	48.084	58.763	58.983	56.644	62.237
26.172	35.654	62.666	21.165	39.779	28.784	32.419	18.723	45.228	25.19	25.39	29.983	47.396	48.084	26.146	27.059	56.445	35.208
40.385	46.049	42.917	32.562	40.795	42.537	43.009	42.353	38.452	33.363	43.979	29.316	50.884	40.856	51.879	44.154	45.811	51.031
15.557	37.028	71.935	38.453	46.974	39.44	31.883	34.623	32.065	27.315	35.365	18.387	40.041	25.211	131.55	26.836	33.212	31.476
21.544	54.533	125.6	35.273	46.974	46.583	43.275	44.751	46.15	30.353	64.425	42.605	48.337	36.04	106.71	47.241	50.522	53.15
14.652	145.76	149.25	111.48	140.2	117	157.86	86.356	156.81	89.013	137.48	99.366	141.04	102.83	140.55	135.52	153.59	159.56
16.975	30.669	39.296	38.244	40.193	39.973	29.696	45.638	29.355	39.265	25.83	27.667	36.174	35.56	35.103	29.321	35.074	25.712
28.21	54.957	92.386	48.51	73.065	64.16	77.785	45.638	72.168	42.599	52.09	40.323	67.996	35.56	49.149	39.11	60.919	48.423
24.477	37.388	49.239	48.51	45.652	50.366	48.369	42.177	54.522	34.096	31.261	21.653	52.162	21.573	42.652	17.219	41.897	28.511
21.117	21.527	48.33	24.528	25.483	28.83	24.499	11.29	37.929	16.123	31.261	10.89	18.528	12.702	75.555	15.354	23.543	19.897
14.212	21.429	35.117	27.067	33.521	22.14	23.854	23.663	18.971	17.586	23.261	14.924	22.659	19.833	22.003	19.803	21.766	24.644
11.188	15.317	11.841	9.2225	13.334	14.424	16.083	14.901	18.514	10.123	43.819	15.148	14.189	11.19	39.765	11.356	16.823	15.751
15.846	15.742	17.079	16.804	19.512	17.553	31.265	26.016	19.67	22.424	24.455	9.8359	33.102	24.485	19.278	17.138	24.617	16.263
18.159	24.189	55.664	26.438	20.209	23.188	37.312	18.77	28.313	17.778	25.824	14.438	22.795	20.235	25.093	26.462	28.861	32.812
22.709	24.786	49.368	19.506	30.18	20.54	32.143	20.974	28.313	20.758	24.552	24.478	31.075	28.563	25.093	33.718	26.994	26.665
71.931	59.623	56.168	62.855	74.194	65.474	59.435	60.597	54.218	54.623	68.907	49.154	76.719	49.22	97.9	44.892	66.125	55.769
41.672	111.4	131.73	95.164	100.64	115.05	114.59	86.894	114.25	73.861	123.55	79.124	126.41	89.265	113.74	78.166	130.62	105.87
61.278	58.633	48.809	55.214	82.002	69.93	49.84	16.691	75.035	23.96	89.603	79.124	41.904	26.881	57.083	37.15	41.228	57.981
44.234	67.552	46.13	56.225	52.027	53.977	58.734	67.295	55.401	64.125	85.831	53.438	71.279	58.678	65.207	50.371	64.478	54.163
37.347	53.796	59.728	57.672	59.119	51.633	47.544	42.107	61.615	40.719	63.126	27.971	58.383	37.635	49.276	44.723	50.452	52.949
36.689	32.044	41.04	22.504	30.019	30.609	29.459	26.626	35.599	33.765	29.039	25.001	34.25	23.697	49.276	26.35	40.456	29.544
29.475	46.934	40.095	40.046	52.396	37.292	47.11	31.149	37.394	30.686	32.321	26.156	49.704	32.672	53.291	31.87	43.878	44.813
47.625	53.359	63.571	46.675	51.188	63.41	54.37	41.082	43.658	41.771	55.28	57.914	63.594	33.792	60.974	52.059	65.954	75.138
38.96	190.76	195.24	138.86	167.31	172.31	219.14	132.32	211.79	133.84	195.43	102.31	215.85	109.91	190.94	129.43	210.57	202.99
29.943	216.28	231.53	176.47	190.29	205.19	219.14	189.92	233.51	164.59	209.25	123.95	241.74	140.42	224.82	168	233.84	237.09
24.665	269.18	241.16	206.76	217.93	250.23	278.38	210.11	266.46	188.45	283.38	142.97	290.05	182.79	309.74	222.05	312.44	282.49
13.138	197.71	166.58	174.41	202.06	179.58	184.18	176.27	203.38	144.17	213.19	78.03	219.5	121.44	209.24	139.99	210.18	196.93
13.181	149.28	140.01	109.15	141.3	148.38	148.75	122.94	150.33	105.54	155.9	72.508	166.18	93.603	185.32	117.72	176.3	157.98
19.744	160.63	167.68	105.02	141.3	148.38	148.75	129.82	161.96	114.33	155.9	89.737	177.56	98.174	310.06	124.44	176.3	158.82
22.413	222.42	159.44	175.94	183.97	192.77	232.21	179.8	214.75	166.66	218.44	115.5	246.35	141.25	237.09	151.77	270.36	243.85
17.232	221.31	221.07	177.37	191.22	200.8	217.81	176.05	231.74	162.81	210.41	110.86	237.71	137.86	241.58	160.45	258.15	230.26
18.796	173.39	154.32	145.44	144.32	158.64	178.47	138.3	171.45	125.3	181.98	90.679	199.18	103.49	241.58	133.51	212.72	184.5
27.399	248.25	187.38	212.54	225.28	227.53	246.44	179.3	221.6	175.85	247.24	126.04	258.93	154.54	244.56	199.88	270.86	266.64
24.752	98.264	101.03	81.397	82.78	86.484	106.74	67.166	95.905	62.838	92.414	66.795	104.98	65.879	111.15	86.092	106.15	104.3
20.898	147.22	133.79	111.02	114.96	131.27	132.7	112.84	137.5	103	148.59	87.504	167.75	97.195	173.46	115.91	180.59	150.97
20.893	181.25	141.18	143.89	143.46	167.54	174.48	142.7	176.89	132.8	181.49	87.504	195.86	120.94	206.52	137.21	220.27	184.01
12.756	116.94	97.477	101.04	98.814	110.08	116.08	94.932	127.5	82.943	118.83	57.503	129.66	73.569	132.15	118.82	142.67	136.11
18.75	137.98	126.68	110.91	113.29	130.18	136.67	101.59	147.54	94.392	141.9	89.903	149.09	92.698	168.22	108.24	159.08	159.13
25.183	52.323	98.246	40.258	49.062	44.965	47.518	38.659	53.912	34.392	70.858	32.45	51.514	33.089	56.75	35.821	57.916	47.518
16.752	35.607	40.797	32.236	39.428	34.088	35.899	32.694	37.89	25.545	44.183	25.282	37.207	27.538	34.329	39.228	41.447	35.096
29.096	71.345	69.215	60.788	67.567	73.76	83.22	67.113	91.275	53.31	71.873	37.145	71.51	50.524	72.579	60.131	77.677	83.025
79.263	64.747	64.48	84.575	69.774	66.139	54.976	53.034	73.259	52.183	93.493	64.806	59.025	40.449	60.585	43.386	66.004	57.486
23.399	15.341	22.209	16.192	16.394	15.823	15.466	13.922	16.322	11.736	13.664	14.132	13.614	14.878	14.179	14.188	15.326	22.96
24.909	69.276	71.933	51.602	74.094	64.47	64.043	60.729	64.878	45.585	69.524	51.459	68.78	53.786	144.79	57.321	71.968	82.473
44.256	97.314	104.56	81.856	76.838	104.86	94.788	75.88	100.33	66.988	112.19	50.112	103.24	64.786	133.34	80.127	112.89	114.65
36.647	47.339	47.932	52.658	58.29	56.788	50.007	36.62	63.099	35.75	50.825	36.1	45.406	34.003	65.173	37.148	48.17	47.875
29.701	30.414	30.126	35.086	26.315	34.52	25.027	17.922	32.772	18.556	45.221	23.461	33.467	21.394	33.008	26.744	29.931	32.392
35.164	54.043	76.267	42.555	51.831	45.364	57.276	35.378	70.784	27.915	74.827	63.062	52.68	44.175	55.179	50.173	39.183	53.312
51.165	73.393	94.937	52.077	84.82	63.617	71.362	42.438	70.784	52.813	46.107	74.279	52.68	83.62	50.638	63.584	40.738	65.143
32.709	47.705	45.869	40.279	39.925	42.297	41.441	31.309	45.922	27.033	36.475	40.037	44.231	38.262	40.697	45.957	42.275	47.3
27.139	40.688	74.47	40.279	43.797	38.663	39.842	31.68	43.633	22.213	35.899	36.728	35.787	31.681	31.358	37.78	42.402	44
26.038	98.12	127.12	78.781	80.885	98.723	109.07	89.583	116.03	85.547	80.245	92.108	88.712	58.799	73.747	72.47	49.491	86.036
28.67	36.035	36.087	34.02	45.541	31.561	35.305	31.195	31.89	21.757	38.823	29.976	35.669	35.539	65.23	32.404	39.061	37.593
25.386	36.603	62.151	34.02	51.783	30.301	30.891	26.068	44.682	17.274	38.823	39.514	32.255	29.073	65.23	38.945	29.817	32.889
42.795	29.195	34.716	24.676	37.36	25.826	29.876	20.666	22.506	22.386	26.52	23.399	25.677	20.081	72.493	26.361	30.542	30.466
26.768	29.702	30.619	38.387	66.052	37.818	43.456	28.041	31.421	23.44	34.474	20.371	30.548	23.975	39.923	29.775	34.711	36.567
24.691	53.195	51.29	61.171	52.962	57.982	47.865	42.284	54.321	39.501	49.596	37.246	54.565	38.437	57.755	43.786	45.143	52.672
35.256	48.917	51.767	40.839	48.115	39.572	40.987	40.262	49.71	29.628	45.795	35.748	46.223	51.585	51.534	39.013	39.47	45.277
52.487	31.738	30.352	28.591	39.203	39.072	30.375	23.12	38.282	25.006	30.525	23.659	29.87	21.381	59.681	27.206	37.5	40.078
26.743	37.715	48.566	40.795	33.534	37.98	43.936	35.971	51.093	33.496	41.742	39.137	37.849	19.046	49.445	26.419	33.172	36.472
42.657	37.715	37.99	27.029	33.534	31.362	40.455	34.498	34.709	31.997	43.214	35.833	37.849	27.264	41.155	39.492	29.039	33.354
32.369	26.055	27.304	16.799	24.29	22.458	26.021	19.388	32.08	15.651	29.481	20.631	24.485	23.513	28.699	24.538	21.596	30.047
32.369	43.769	65.256	41.789	50.726	38.47	39.953	32.562	38.739	27.454	48.045	34.261	50.594	47.857	42.91	38.252	43.659	43.696
27.458	40.545	42.119	41.789	39.602	30.649	37.54	31.254	37.228	25.401	40.129	34.261	41.49	43.433	39.403	33.05	36.193	41.943
23.887	26.818	25.174	22.649	37.516	35.441	29.876	24.32	32.624	25.915	26.348	29.551	32.684	25.518	37.719	22.585	30.005	37.341
22.32	24.658	20.358	20.336	21.787	23.325	26.625	24.32	27.894	17.407	18.345	16.742	21.468	17.173	22.514	22.568	22.808	21.905
41.508	55.625	68.37	49.528	50.282	57.133	64.588	66.828	69.924	35.905	41.927	50.284	49.706	45.067	42.863	40.247	49.166	56.692
22.014	88.47	113.12	92.316	82.366	97.368	79.716	108.32	105.46	83.813	78.3	37.17	114.4	66.117	72.669	50.478	59.429	64.107
29.222	60.839	80.094	38.547	43.362	47.581	53.672	39.822	53.352	41.625	46.172	37.17	59.302	51.496	72.669	49.144	48.848	63.068
30.87	53.898	89.219	50.177	46.576	62.136	65.723	47.324	56.693	41.291	59.882	39.46	50.027	42.744	56.145	45.599	53.845	51.829
52.62	57.657	98.256	48.214	52.565	56.441	55.466	41.962	67.888	39.401	51.872	43.444	52.075	39.246	51.255	46.672	53.12	57.907
34.338	35.091	59.645	23.426	33.471	33.291	32.187	30.278	33.559	18.735	46.694	31.188	38.424	27.784	50.747	30.688	37.917	34.005
47.05	31.193	43.21	31.034	27.127	31.966	29.455	27.215	30.457	22.248	29.35	16.828	30.823	23.105	31.161	22.975	33.354	29.189
35.621	40.23	67.209	37.75	44.807	41.945	37.308	31.533	50.297	24.096	37.839	25.23	45.907	27.393	31.161	28.86	34.598	36.194
50.746	52.93	70.573	54.233	75.601	68.068	50.7	45.583	54.595	32.248	55.342	39.893	51.145	41.486	52.656	43.45	45.145	42.987
60.981	104.09	91.757	83.402	103.54	89.448	92.094	111.08	91.68	93.968	62.852	62.848	118.5	89.027	77.658	68.098	72.426	84.417
47.974	47.633	37.769	41.198	66.315	37.489	59.926	41.63	53.269	35.471	33.032	43.018	49.248	45.133	69.376	42.4	37.873	52.346
47.531	24.415	39.031	22.82	26.238	31.33	28.338	36.213	33.405	24.861	40.019	18.36	39.145	39.287	24.117	34.226	30.888	28.836
43.62	27.523	31.9	17.904	29.174	19.514	23.188	33.801	26.993	23.502	24.521	19.025	29.173	35.165	30.763	27.986	22.372	22.137
26.151	20.356	28.677	23.275	24.753	24.06	22.877	17.997	31.237	16.678	24.21	13.153	22.441	14.883	57.686	23.476	21.173	24.776
33.532	56.203	54.949	44.773	67.15	44.763	69.175	49.353	64.429	33.569	47.073	39.982	52.381	33.61	87.014	39.788	52.723	55.514
24.484	28.686	50.745	24.234	35.227	24.902	31.645	22.801	37.54	20.47	25.602	24.622	24.449	24.83	46.808	25.782	26.823	32.416
38.249	35.709	50.303	32.173	34.165	33.304	41.113	24.795	47.532	21.642	32.217	29.144	32.393	29.934	29.142	25.782	34.778	35.395
35.498	32.288	52.052	29.898	27.872	31.983	36.938	34.42	30.863	27.319	29.926	28.378	35.354	28.129	53.104	28.748	44.083	42.64
31.368	37.883	35.08	41.595	39.479	47.844	45.362	50.089	33.898	45.207	37.19	33.556	34.778	35.567	33.609	32.293	36.623	38.084
43.282	40.684	36.478	41.277	33.527	48.743	34.144	40.177	40.377	40.401	45.535	34.918	43.739	26.07	40.718	28.025	43.746	41.712
43.282	39.579	34.398	41.218	28.612	42.573	34.144	40.177	36.185	40.401	36.913	30.612	39.616	29.93	41.125	29.588	44.621	43.376
42.43	30.489	33.056	42.592	35.691	26.996	45.222	30.52	33.1	31.751	26.859	26.332	37.271	22.315	24.95	20.198	51.717	32.144
64.156	43.064	51.625	36.025	40.84	40.664	43.789	42.129	41.008	28.513	40.431	31.087	46.479	28.159	42.434	39.724	51.717	51.016
37.414	48.564	44.461	34.058	46.537	53.527	45.992	45.946	48.105	39.966	44.874	46.006	55.373	37.493	53.011	47.544	54.502	54.213
43.699	47.829	62.59	37.721	54.029	51.006	54.452	49.052	48.105	35.834	50.533	45.104	69.609	42.854	51.527	47.544	54.502	47.76
41.299	80.325	78.219	92.435	75.106	85.267	66.32	59.558	69.155	47.366	99.453	45.633	71.36	51.572	66.414	61.974	77.004	72.542
40.326	52.305	50.132	48.546	65.568	53.221	53.916	42.085	61.678	36.247	67.22	40.322	52.187	47.17	50.77	42.523	78.904	49.795
59.274	101.44	84.012	80.382	89.112	95.661	108.65	77.542	110.63	68.834	99.55	69.266	99.531	66.648	95.033	84.601	106.54	108.2
33.162	37.463	37.919	48.199	31.736	43.421	35.35	39.277	35.673	33.801	56.447	29.045	35.224	23.437	38.648	27.912	48.605	38.167
20.503	40.667	41.604	39.587	40.474	39.386	50.469	27.331	54.705	25.931	43.187	37.517	35.133	24.441	34.232	40.592	42.53	46.076
18.515	57.075	81.898	44.142	51.771	48.643	62.285	34.736	85.602	31.184	46.848	49.031	42.922	46.682	43.809	60.224	45.504	63.708
29.847	97.781	118.22	60.342	83.195	77.777	108.86	82.851	95.493	67.478	87.736	61.229	100.59	81.867	114.27	79.791	96.675	110.82
31.335	97.781	118.22	93.712	83.195	77.777	108.86	82.851	95.493	67.478	87.736	61.229	100.59	81.867	234.21	79.791	96.675	110.82
61.938	69.864	76.149	65.597	66.214	61.536	73.929	62.59	72.488	47.766	63.61	47.276	81.535	51.17	101.25	52.182	74.248	71.411
31.72	59.496	48.695	67.579	53.646	62.376	72.282	55.261	68.499	48.192	49.423	37.364	68.586	41.403	75.878	52.022	51.469	61.399
18.319	59.496	42.627	67.579	53.646	62.376	72.282	55.261	68.499	48.192	49.423	37.364	61.509	42.118	54.968	52.022	51.046	61.399
19.541	196.78	184.3	172.23	181.83	193.34	201.88	149.28	190.4	135.89	181.07	108.71	197.34	130.25	201.32	149.27	220.07	208.17
17.826	143.9	139.9	108.32	128.32	148.97	170.73	107.56	159.67	99.453	164.37	87.875	158.57	95.594	133.37	101.66	141.96	159.64
38.038	42.347	41.76	29.214	59.071	62.704	47.007	37.795	42.697	30.474	35.505	19.281	56.834	31.64	55.878	27.653	43.696	41.709
41.299	59.503	101.26	62.164	64.357	77.335	66.926	47.874	63.991	42.605	69.337	56.504	62.418	43.79	100.24	38.389	61.476	57.666
35.176	207.09	203.49	176.55	214.38	219.21	233.28	184.58	241.22	153.08	196.9	117.7	246.89	143.19	210.72	171.12	234.93	218.27
48.996	284.12	255.46	230.04	260.21	257.75	282.86	197.85	307.66	179.36	286.43	171.66	262.04	197.56	262.07	216.27	298.8	290.83
74.948	333.83	255.46	274.01	261.83	302.75	329.32	273.85	312.57	253.02	291.84	185.15	383.02	211.56	364.15	278.8	365.93	359.86
34.775	336.47	308.36	283.34	315.55	303.64	322.63	249.21	324.36	229.2	333.44	190.67	356.68	240.96	338.56	269.3	374.64	361.87
61.611	312.76	252.83	249.99	284.48	280.96	300.98	238.96	307.2	213.8	304.96	170.31	321.89	224.27	315.25	240.36	348.14	319.85
65.029	203.42	166.98	162.16	189.41	184.69	221.12	160.1	224.68	152.23	196.74	108.54	222.39	136.53	201.31	171.72	221.49	222.67
55.831	105.98	91.75	101.32	89.369	98.833	89.053	82.816	95.826	75.669	100.14	59.025	112.13	76.152	98.536	79.252	128.79	108.34
45.347	70.887	70.493	76.398	66.342	66.521	78.73	61.926	74.562	50.422	64.349	41.582	74.243	44.077	74.957	58.151	72.885	73.528
32.104	148	130.09	128.04	148.24	149.17	145.53	125.14	151.58	117.11	144.69	66.801	173.4	93.565	143.97	107.84	188.61	142.95
46.263	97.125	87.775	91.189	84.457	91.657	96.103	87.826	102.64	78.306	98.471	46.548	111.99	64.317	130.7	68.257	118.47	97.403
26.884	186.98	164.14	140	156.08	160.69	178.37	154.01	167.62	137	180.85	106.94	214.6	109.46	208.65	151.31	222.67	194.26
51.522	165.12	129.22	155.34	145.07	152.15	158	136.31	155.03	124.58	170.11	76.884	193.36	102.9	197.22	123.23	193.68	171.96
32.698	164.82	137.5	145.17	153.57	154.65	167	134.92	174.75	117.44	147.41	90.082	174.37	110.73	201.48	124.98	178.58	173.96
55.648	164.82	135.34	136.34	129.26	154.65	144.48	134.92	151.28	117.44	147.41	90.627	174.37	103.94	174.35	126.64	178.58	167.64
48.554	143.6	118.32	106.62	129.26	129.77	137.16	112.68	132.7	101.28	143.07	76.935	162.99	88.325	158.78	126.64	169.29	159.09
33.175	112.12	84.879	97.647	95.819	101.16	115.43	106.86	112.36	76.246	108.9	55.32	112.59	66.36	121.32	99.543	135.06	117.11
28.16	140.79	105.37	116.61	121.95	137.01	153.98	150.68	152.02	123.37	129.95	66.044	163.4	104.04	170.93	107.47	170.39	128.65
26.805	118.84	112.76	105.03	115.4	111.69	115.55	98.824	112.97	86.991	109.97	66.51	130.43	92.212	123.28	89.176	131.62	122.34
24.829	92.726	84.686	92.476	80.581	87.973	91.797	75.26	96.563	62.035	88.312	54.072	102.77	62.589	99.091	68.361	83.479	95.095
41.881	113.17	92.298	92.476	93.615	101.28	121.45	81.779	116.44	79.046	122.34	58.288	119.81	75.278	113.69	99.82	132.56	133.87
38.642	139.85	128.19	129.32	123.96	128.23	132.07	110.76	137.67	102.56	149.02	70.061	152.83	87.209	137.17	94.916	175.07	130.26
26.802	127.07	100.12	105.41	105.71	116.35	129.29	117.76	127.22	96.168	116.94	61.767	144.47	81.804	154.29	100.18	160.47	136.33
22.668	110.11	89.108	105.41	92.749	107.32	116.4	99.09	123.54	78.967	117.86	58.516	116.43	79.827	117	87.908	119.63	125.43
26.854	117.62	99.887	98.46	98.434	111.5	120.9	91.803	116.55	85.534	116.69	63.504	125.48	79.511	131.96	95.886	141.5	126.08
31.758	98.391	98.618	76.173	95.709	81.276	93.739	76.199	97.86	69.411	94.701	60.881	103.33	74.81	106.19	84.13	107.95	106.76
39.626	176.55	135.57	155.16	151.41	162.29	177.45	166.04	171.97	154.06	175.97	82.718	206.55	116.45	187.16	122.96	208.32	170.46
32.282	231.09	200.74	165.41	203.63	192.36	235.33	188.49	237.72	163.51	212.34	129.01	257	140.52	242.55	178.1	273.43	250.87
34.217	246.67	208.42	182.64	218.08	210.09	247.37	180.54	246.27	159.27	243.52	134.98	252.5	163.83	244.43	191.41	263.91	258.65
32.604	239.09	194.15	211.98	200.43	246.92	247.23	207.61	255.31	192.09	235.74	119.18	256.73	139.16	218.98	175.1	252.2	241.94
43.695	239.88	188.72	154.52	202.34	204.45	227.4	179.15	230.73	168.32	240.48	116.3	262.06	151.1	254.18	179.69	266.02	250.71
62.454	180.32	152.71	145.72	166.58	168.76	168.48	142.54	176.86	133.66	180.96	93.528	199.29	116.03	198.33	134.34	226.09	183.28
36.853	184.42	152.76	185.41	154.75	173.02	167.41	144.7	177.15	133.66	188.12	93.031	200.76	140.01	198.33	146.29	206	183.28
36.853	222.83	198.54	176.48	194.84	226.96	210.79	191.14	191.82	185.05	193.01	117.79	260.74	176.99	222.65	183.81	242.5	224.11
23.114	225.17	177.29	186.67	213.63	193.32	213.44	179.54	215.73	170.48	222.51	141.87	249.17	162.6	239.62	165.4	234.81	235.28
36.34	259.95	214.92	186.26	281.67	199.96	260.69	202.09	235.53	177.75	251.2	147.22	292.67	165.06	267.41	193.14	290.15	277.85
32.571	148.16	185.89	145.2	126.81	133.93	162.08	103.28	156.51	105.12	131.91	97.627	154.37	110.02	152.76	134.26	159.78	161.87
52.217	100.82	128.92	80.177	79.663	98.285	111.76	78.565	93.911	70.433	87.051	69.964	101.18	64.882	95.835	79.655	101.96	106.2
44.327	46.748	63.229	33.609	44.266	43.851	46.09	36.021	51.179	29.768	40	38.411	51.293	37.662	43.723	41.503	45.736	47.502
36.563	47.516	38.908	40.736	43.299	34.604	78.524	45.997	52.694	31.532	35.356	32.246	47.782	50.222	43.18	47.566	53.852	41.562
62.485	65.707	83.21	62.389	72.737	61.625	65.081	59.782	59.363	42.966	61.511	44.508	62.069	55.284	119.68	49.829	71.175	58.604
60.464	45.412	45.381	42.811	40.29	37.752	42.702	39.777	42.396	27.626	44.052	33.53	48.808	40.521	60.07	40.687	47.31	45.13
44.178	41.558	44.589	38.821	52.494	47.412	34.367	47.272	40.749	29.051	46.698	28.374	46.54	29.436	37.684	26.138	37.761	40.042
84.098	105.15	100.34	93.265	95.544	100.48	107.25	82.799	113.46	70.082	104.75	69.259	101.26	64.318	110.29	83.655	93.748	105.35
41.998	72.405	71.156	70.841	71.449	73.186	72.569	58.336	68.624	52.254	85.794	53.841	61.606	60.397	99.65	60.604	64.962	69.913
54.478	131.72	164.85	98.87	140.61	112.9	127.71	115.35	144.68	95.067	132.93	86.902	143.7	117.39	122	88.262	122.63	97.582
55.708	61.219	84.988	70.77	63.671	58.026	67.253	92.342	72.242	49.509	62.665	60.02	78.082	53.302	56.774	44.116	63.87	60.466
30.114	59.78	73.952	62.216	69.771	63.115	61.459	52.981	63.135	41.358	55.22	36	64.504	41.468	56.696	50.397	64.746	63.222
43.002	76.91	84.903	72.486	108.07	78.266	82.473	63.288	77.608	53.519	74.847	62.144	75.329	49.531	80.858	60.848	70.311	79.663
27.433	162.17	186.09	138.6	159.26	148.75	159.28	119.41	170.36	97.586	195.05	110.53	134.84	93.831	218.78	132.87	175.62	163.56
33.306	127.69	92.493	112.85	110.84	119.22	121.27	115.29	109.03	99.41	108.89	65.693	169.22	122.03	133.75	92.877	140.13	111.41
36.648	67.237	46.587	54.04	56.369	71.759	57.431	60.021	67.237	65.981	55.758	39.785	79.409	55.126	70.559	46.675	78.391	62.22
61.049	57.399	58.437	75.61	58.524	63.521	59.099	41.094	64.146	47.282	44.43	51.873	49.488	43.363	61.519	46.825	57.447	60.444
77.551	48.837	47.579	43.836	50.754	44.771	48.81	42.42	50.76	38.492	44.43	40.872	58.553	43.363	50.077	46.825	62.787	54.699
75.664	51.593	50.38	40.542	53.187	44.922	55.983	41.145	49.066	32.178	50.95	36.655	54.011	43.687	50.828	44.076	52.853	54.713
73.333	52.987	52.2	52.736	53.226	49.344	54.164	39.337	53.336	35.318	49.981	40.773	52.308	43.686	68.162	45.804	66.883	59.608
65.327	52.243	51.658	49.709	53.226	47.394	55.571	35.811	55.602	35.191	48.887	39.603	53.53	39.312	57.404	43.694	65.295	55.519
48.451	44.576	47.84	45.024	52.633	40.561	44.399	35.889	49.928	30.529	38.629	32.202	40.593	39.312	40.789	43.122	47.987	45.852
51.604	57.167	57.555	74.498	54.159	42.951	44.815	48.525	60.567	37.76	62.592	38.195	53.033	47.872	47.385	48.541	51.923	44.022
49.848	37.423	33.555	34.125	40.673	27.851	37.231	26.32	43.858	21.92	32.566	26.433	35.033	29.515	35.022	31.302	34.123	37.347
24.445	18.792	26.001	18.032	16.948	18.877	17.954	22.634	21.111	13.981	17.468	17.521	24.225	15.598	21.126	14.068	23.556	22.802
43.416	58.096	56.516	66.977	49.303	56.37	55.916	53.313	59.823	43.976	45.722	43.115	69.216	49.308	57.171	42.161	63.149	56.823
67.259	42.32	37.271	40.407	38.69	30.202	40.661	29.271	35.337	25.631	39.383	37.868	41.265	45.702	48.532	46.496	37.035	46.373
36.72	43.365	37.271	42.859	48.408	39.131	47.432	38.374	47.935	31.816	43.14	33.393	46.31	36.3	55.675	44.632	51.391	46.373
49.371	48.491	45.384	38.104	48.072	40.818	43.345	44.109	43.983	26.032	48.629	34.542	57.685	51.886	54.989	44.097	44.01	39.516
67.537	65.35	61.173	45.804	53.536	53.541	60.925	52.282	57.681	43.472	62.748	47.371	65.533	54.943	67.194	55.043	78.83	66.297
41.005	56.657	35.316	45.34	51.454	49.924	40.92	66.552	35.925	66.151	43.97	26.811	63.518	61.752	79.678	43.637	61.581	44.303
40.5	105.46	114.76	93.575	114.88	96.108	79.424	89.18	88.074	62.666	74.348	72.947	147.8	126.81	84.393	85.288	88.346	84.801
40.5	47.615	56.004	37.943	56.133	41.032	45.059	31.819	40.29	29.242	44.423	37.989	59.267	30.83	41.702	34.866	36.552	44.245
22.725	19.694	28.466	16.145	35.241	16.509	17.478	14.609	22.387	19.896	17.927	15.064	21.867	20.688	38.7	17.808	35.383	17.893
33.141	40.052	43.437	44.038	59.665	45.211	37.079	31.331	37.882	30.662	41.302	31.928	41.797	34.811	82.852	35.707	46.222	42.333
57.72	75.433	75.678	68.034	73.483	70.971	55.933	65.177	63.406	47.102	63.348	50.373	90.952	78.934	56.106	59.33	62.347	47.991
79.574	75.433	69.283	69.808	62.997	71.084	76.354	61.254	86.941	47.102	72.944	49.834	83.025	54.757	68.264	47.276	67.194	62.687
69.969	52.403	52.852	46.067	47.585	45.953	47.288	35.11	52.725	36.596	39.177	35.404	54.919	28.698	70.746	36.512	47.732	53.919
61.144	138.61	117.28	97.639	130.16	117.97	143.38	120.04	130.94	89.187	130.73	68.769	145.31	100.18	152	95.728	115.47	143.29
32.119	64.496	54.483	59.674	60.854	53.567	78.458	107	63.598	69.002	58.73	44.949	72.984	79.144	69.564	57.778	62.39	64.774
52.373	89.184	75.016	51.614	89.387	61.583	73.118	94.709	67.263	72.946	60.604	57.149	112.74	146.69	76.488	87.821	65.481	66.807
39.24	69.844	59.354	50.568	62.895	61.583	52.539	57.853	67.263	46.389	53.058	48.842	74.254	96.318	50.375	55.065	54.099	51
57.598	61.355	71.305	49.3	79.193	51.752	48.049	52.992	48.947	45.507	42.476	56.917	73.787	96.521	52.009	45.878	41.921	51.049
46.088	48.626	52.64	37.205	42.452	43.774	39.042	35.991	44.903	32.295	46.102	40.875	46.814	35.933	46.788	40.471	58.351	54.875
79.521	60.804	51.649	48.912	46.543	56.303	54.48	46.662	57.073	43.258	66.356	41.179	60.559	39.758	84.728	45.635	63.274	59.668
31.448	38.528	35.364	33.783	40.411	34.595	40.356	30.157	39.21	30.832	43.81	28.833	40.972	43.602	38.071	30.485	41.709	38.203
58.112	52.494	51.327	42.469	50.919	48.963	48.937	41.537	57.766	34.14	62.727	42.587	54.1	46.98	47.54	44.649	46.584	56.099
58.46	63.259	77.843	43.372	64.861	50.317	56.073	41.537	55.391	35.513	61.842	48.627	60.827	55.575	78.658	58.062	45.932	61.11
54.001	41.535	37.113	32.507	41.149	31.925	36.984	27.7	31.176	25.247	37.738	27.467	46.777	47.425	58.388	44.596	34.006	44.252
47.508	26.972	26.165	30.36	28.333	20.933	27.841	27.7	28.467	18.194	24.659	18.464	26.282	22.037	28.853	25.348	28.503	30.353
47.508	38.745	43.799	24.692	48.261	29.257	41.659	32.873	41.28	28.32	41.012	31.304	36.811	31.276	42.884	31.441	35.838	39.118
70.589	49.335	43.727	37.638	48.261	47.313	44.781	42.892	47.324	36.362	55.85	39.795	55.425	42.465	52.002	45.116	53.28	50.682
44.943	46.065	40.18	37.638	40.607	43.145	41.237	40.085	44.734	36.362	51.543	36.879	49.805	40.139	48.05	41.574	46.214	47.795
44.943	44.299	36.796	38.015	40.607	37.259	40.423	30.208	37.354	30.009	42.627	35.924	44.861	34.094	42.547	39.962	44.685	44.718
38.342	32.29	34.994	20.401	39.499	35.616	28.379	26.033	36.997	23.828	33.257	26.242	36.551	31.057	31.995	25.999	33.647	35.802
31.992	15.487	22.539	17.974	19.694	16.455	55.462	14.094	24.446	17.526	16.243	15.308	21.018	13.184	18.17	16.294	17.332	15.488
31.312	19.619	19.801	17.184	28.687	16.87	23.218	18.149	20.939	13.01	15.406	11.402	19.234	24.364	19.347	12.379	16.535	17.541
74.494	38.382	46.371	35.653	41.772	35.154	37.497	31.076	41.851	19.598	48.893	32.608	41.525	50.231	34.66	40.248	39.665	42.714
12.443	16.24	22.032	20.379	27.211	22.013	16.948	22.785	27.441	19.465	15.319	18.339	16.912	22.667	16.292	17.339	21.296	19.182
34.84	41.587	36.59	39.947	32.875	31.878	37.363	28.647	43.735	24.266	41.114	36.084	39.457	32.581	44.053	40.605	38.893	43.256
36.75	44.453	46.788	59.495	42.251	47.814	42.218	42.913	59.636	32.066	42.681	36.084	49.74	35.142	91.204	40.502	48.963	48.218
31.893	26.788	25.386	54.625	21.31	29.321	35.033	25.293	35.861	26.102	16.437	12	37.209	23.187	48.796	14.202	31.709	29.678
45.475	34.065	33.793	33.024	37.165	27.617	33.923	34.374	35.887	23.349	41.203	23.856	34.76	20.532	38.793	35.718	33.947	40.264
22.328	21.338	21.672	27.108	22.024	20.313	18.905	16.865	21.024	16.348	22.203	18.55	24.165	19.288	32.068	18.822	23.74	21.816
29.917	24.244	27.432	57.117	22.089	31.304	24.471	17.355	26.451	16.751	22.203	14.943	25.835	18.782	32.068	18.822	23.74	24.597
71.58	67.498	103.67	68.41	70.555	57.953	51.606	53.08	50.504	37.886	61.214	43.276	74.129	60.185	59.972	52.802	52.785	54.399
40.493	28.624	24.529	31.494	25.016	26.029	35.165	28.53	27.836	22.748	27.555	20.295	36.732	30.054	25.435	26.658	27.233	33.878
45.592	56.082	53.482	58.239	67.772	55.017	48.35	43.345	62.279	41.288	66.089	78.828	65.707	52.931	54.409	42.092	44.938	43.385
45.592	54.103	50.373	51.98	48.262	48.054	48.35	40.149	56.49	35.204	56.943	39.12	51.98	38.368	54.409	39.86	51.904	59.311
39.457	45.063	48.969	42.741	44.942	38.716	44.848	33.142	46.276	25.119	45.648	38.652	39.202	33.921	51.813	40.841	40.323	51.117
35.057	40.938	55.899	35.319	37.934	32.89	42.532	25.167	40.079	20.296	37.088	37.797	37.164	46.879	28.81	44.408	31.056	44.952
26.965	31.982	36.267	31.426	27.047	29.539	41.366	30.061	36.607	28.295	27.108	25.881	36.365	34.324	31.745	27.68	31.056	34.319
26.965	23.789	27.062	31.727	26.568	23.314	26.282	18.504	36.607	15.597	24.988	18.76	21.855	29.382	31.745	24.111	24.547	26.366
37.149	36.537	36.915	27.03	32.496	28.687	34.674	26.604	41.523	23.497	31.165	28.821	31.099	32.07	27.515	28.549	31.55	37.549
34.727	31.855	32.03	24.859	38.123	25.917	32.411	23.938	37.074	19.867	29.162	26.842	31.27	30.434	27.515	27.94	31.55	36.175
28.756	34.43	34.576	32.376	38.123	32.394	28.751	29.029	40.604	25.571	56.81	29.438	41.496	43.19	33.026	39.554	40.333	33.693
43.885	34.286	28.448	30.803	30.113	27.273	28.751	30.91	28.202	25.571	33.429	23.677	41.496	30.83	33.026	28.908	41.489	33.693
43.539	55.476	55.919	58.032	47.831	54.635	51.946	55.336	56.477	46.917	46.751	42.335	53.639	47.96	79.383	47.243	57.27	55.297
42.506	44.989	43.08	40.923	45.183	41.349	46.953	31.229	43.372	29.607	36.772	31.122	45.343	34.422	51.036	36.829	50.479	47.623
40.692	27.278	25.061	25.448	25.825	23.476	29.818	27.625	31.117	18.833	36.388	22.153	27.789	27.058	28.932	23.691	29.655	40.43
48.541	42.198	41.962	43.108	43.569	44.602	34.828	44.767	36.871	42.766	42.41	28.013	47.991	34.187	59.395	35.395	54.733	44.971
30.163	36.935	30.974	35.905	23.515	44.602	26.944	42.93	24.809	42.017	33.069	23.036	41.915	29.966	72.698	32.018	47.737	44.971
42.056	38.919	37.964	40.774	37.782	37.986	41.668	34.31	34.66	31.426	47.951	32.752	39.769	36.336	38.361	35.007	39.257	37.307
26.522	25.409	26.572	21.453	22.977	23.706	26.094	21.88	22.177	15.843	24.801	18.921	25.233	25.138	21.714	25.117	23.987	27.881
41.012	52.02	57.56	49.271	51.152	45.185	50.925	40.708	52.541	35.227	50.468	39.363	55.777	40.794	54.332	39.968	55.159	56.065
44.588	64.37	75.547	63.244	66.013	62.388	60.903	51.114	62.531	46.687	56.801	40.419	69.626	49.724	62.887	49.231	71.71	73.593
46.219	70.831	86.78	60.393	68.698	54.748	55.919	52.139	56.657	42.125	72.596	52.251	75.936	64.402	70.994	56.147	66.106	55.7
47.653	72.188	76.433	54.542	68.698	69.95	69.387	54.373	71.702	45.369	78.158	49.097	75.936	64.402	85.555	60.57	75.211	79.738
98.933	123.34	161.05	90.475	124.21	78.998	91.453	98.307	118.11	78.437	96.048	82.463	131.25	124.11	104.47	93.145	93.134	79.922
48.573	54.39	45.297	35.931	48.108	43.357	54.036	40.42	45.402	35.351	46.219	49.172	51.839	56.102	69.336	51.769	40.591	54.101
54.915	69.732	69.899	55.526	63.878	59.294	73.784	52.579	65.466	41.872	58.59	50.195	76.576	66.06	88.26	51.769	67.052	60.412
18.916	60.822	62.604	47.982	61.919	55.117	65.723	51.761	65.276	41.68	68.755	42.973	62.387	46.95	73.414	49.054	68.706	71.188
17.317	60.822	62.604	47.908	51.366	50.636	54.771	45.118	58.079	40.083	67.48	34.517	60.88	46.95	82.515	44.937	81.106	67.335
41.841	34.752	39.091	26.995	36.7	30.694	33.326	29.472	35.037	24.561	35.611	25.945	36.811	29.079	70.48	28.725	43.42	35.951
24.467	38.357	51.642	39.406	46.706	35.681	30.97	35.972	37.127	30.511	33.647	35.191	39.334	36.858	65.685	30.314	37.128	34.768
28.452	27.902	35.006	30.711	32.123	26.685	31.55	23.43	30.205	26.266	25.626	23.898	34.197	30.746	57.628	27.122	26.476	27.558
28.452	40.346	43.614	33.368	37.173	29.739	30.999	32.244	42.949	21.644	37.708	28.256	43.003	32.984	43.615	36.484	29.75	40.626
41.761	54.301	62.236	60.116	39.816	56.162	46.49	42.669	57.841	31.798	60.859	38.869	63.402	34.499	54.467	49.753	41.423	47.317
16.761	21.878	27.654	17.926	17.821	22.241	24.246	26.681	14.833	14.807	27.233	22.628	28.118	17.332	34.923	27.836	20.193	28.592
28.165	17.244	15.382	24.69	16.477	16.719	24.246	47.258	16.567	14.807	17.126	11.773	17.134	12.776	45.78	14.421	19.574	17.592
36.029	35.883	36.41	32.562	32.251	29.801	32.255	36.488	36.933	23.177	27.134	26.593	36.084	35.286	32.804	32.836	31.97	41.504
42.296	23.725	23.484	30.86	26.985	21.93	25.331	57.594	29.451	15.767	23.447	15.358	29.255	16.384	30.516	19.628	27.054	27.459
34.317	28.741	23.266	24.989	27.374	27.53	39.379	23.726	33.576	21.009	28.778	20.502	31.856	21.478	28.526	20.48	30.523	30.745
47.392	47.261	42.319	39.715	42.081	44.888	45.619	44.868	47.634	34.769	43.384	35.089	47.024	33.972	58.038	37.334	46.423	54.13
59.016	47.261	41.143	61.119	38.747	53.111	52.764	79.516	49.567	34.769	40.911	31.416	40.527	30.398	46.257	35.836	44.484	50.743
46.698	52.287	44.168	61.871	38.747	53.111	54.245	50.443	53.888	38.764	46.657	32.094	54.823	34.91	49.485	41.029	47.769	56.839
37.082	34.893	35.914	37.792	42.099	31.792	32.404	25.874	37.927	23.053	36.44	25.598	37.159	30.102	33.36	35.509	34.177	35.593
39.931	74.116	65.682	78.339	74.271	67.144	59.087	100.71	64.254	47.29	62.034	55.269	74.759	53.906	75.917	62.293	76.755	72.532
52.127	75.974	68.349	91.443	65.904	67.953	72.818	68.349	65.831	39.676	67.911	45.529	60.825	49.617	85.504	50.274	56.007	61.671
41.528	59.617	50.723	74.95	60.64	55.021	58.952	53.652	41.989	41.281	51.285	42.389	51.808	49.277	73.915	49.02	48.6	61.641
36.573	36.526	32.825	46.108	29.01	37.152	37.569	28.353	46.332	28.556	34.209	24.476	34.856	27.818	41.208	27.094	34.983	30.717
35.071	29.972	26.898	30.924	30.58	25.572	26.207	26.408	30.419	23.363	31.106	20.185	35.779	26.677	42.367	24.287	29.324	30.005
30.584	29.972	28.586	21.379	30.58	25.572	26.207	21.099	30.419	22.253	31.106	19.843	35.779	26.677	45.173	24.287	31.107	25.819
31.749	34.243	38.523	30.292	28.522	25.316	32.527	24.742	30.157	21.409	34.365	32.085	32.436	25.024	59.368	32.949	44.596	32.927
33.04	30.464	28.721	30.788	23.554	29.229	28.997	26.584	29.761	27.711	30.185	20.327	30.921	25.061	32.006	21.79	42.809	32.115
37.482	34.474	32.072	50.441	31.745	31.319	32.904	61.932	33.52	27.711	33.691	21.328	35.925	32.345	61.728	27.398	42.809	34.403
29.329	46.557	41.862	50.429	44.482	70.199	43.236	104.58	51.932	52.873	36.912	27.126	49.277	51.32	53.017	34.193	45.837	43.997
27.031	46.557	41.862	50.768	44.482	51.802	43.236	111.34	48.634	44.371	39.564	28.468	49.277	41.194	79.286	34.913	44.089	43.997
56.32	74.418	68.025	58.159	60.359	51.802	53.663	85.525	50.729	47.382	55.953	46.629	96.569	110.21	76.894	59.604	81.084	57.885
29.289	23.072	23.334	35.164	21.207	25.255	31.224	18.947	31.311	17.217	26.474	12.26	22.651	13.821	57.311	18.436	25.718	33.134
67.083	50.653	71.839	54.05	58.472	33.712	54.74	42.679	57.617	26.369	45.746	43.719	55.288	47.327	73.497	49.792	47.094	58.805
48.914	37.197	47.996	42.223	53.019	34.723	31.989	31.144	38.978	28.767	41.209	23.092	45.247	35.207	35.243	27.784	40.794	34.43
24.657	30.391	24.927	34.39	28.842	30.192	22.682	26.624	33.182	22.817	25.345	19.891	35.564	29.219	37.215	22.229	27.621	24.739
174.16	95.685	93.538	88.539	85.806	92.125	96.872	70.73	100.35	60.033	98.822	61.41	100.96	78.971	87.562	77.459	100.05	104.29
47.457	51.549	62.301	58.97	51.773	50.821	75.162	58.386	51.166	34.499	42.085	32.338	47.882	44.656	50.716	45.895	43.674	50.799
55.526	53.698	48.702	58.97	71.761	56.109	57.343	53.103	52.283	30.891	46.13	37.159	47.422	31.849	48.357	40.512	46.031	41.506
61.055	45.68	36.462	41.252	64.671	41.789	40.092	60.924	68.949	38.093	40.307	26.875	52.085	37.499	52.542	34.9	42.183	41.506
41.055	31.582	29.423	34.615	32.972	30.017	30.318	25.4	32.758	19.627	35.112	27.995	30.732	29.001	29.794	25.023	31.876	30.965
63.994	51.582	58.174	50.435	67.713	47.817	57.899	35.438	61.188	29.453	56.702	46.115	60.456	59.576	44.888	47.7	50.069	50.642
78.939	81.043	77.773	64.512	77.03	68.694	80.214	51.378	79.81	50.185	62.619	73.442	95.6	79.223	67.824	67.309	75.184	73.32
80.844	100.58	103	74.754	100.18	82.15	90.302	63.996	90.93	61.051	74.654	78.514	107.48	112.74	98.198	85.366	93.182	96.971
200.44	104.35	105.53	93.544	102.88	91.588	87.094	89.902	105.62	74.505	93.392	68.133	123.22	72.208	106.02	72.992	100.81	92.21
100.32	103.24	99.306	74.476	101.06	86.907	87.094	76.355	81.399	60.005	77.984	66.828	103.56	86.621	101.74	68.358	105.56	80.291
61.153	109.91	143.06	103.39	126.12	102.13	86.373	103.83	82.034	70.212	84.329	93.378	115.01	89.129	93.191	98.211	95.401	87.549
90.006	75.631	77.437	67.478	73.837	67.906	80.474	57.813	71.014	53.46	69.608	55.961	74.29	65.624	75.944	69.561	78.388	79.566
64.717	75.351	79.492	64.181	72.163	69.679	80.474	50.81	70.208	53.46	70.859	64.72	72.253	65.624	74.17	69.561	72.474	75.565
49.239	59.89	70.91	46.295	62.37	51.227	62.041	41.933	55.966	35.597	52.121	33.681	52.691	37.198	46.695	42.103	47.803	57.653
79.508	81.699	84.666	80.136	95.285	60.157	99.75	74.836	81.049	43.081	77.051	78.309	79.34	63.974	61.97	68.79	68.078	78.325
53.956	78.083	91.786	52.137	72.122	72.298	75.899	55.43	76.14	47.873	69.633	54.516	76.84	71.495	73.907	65.69	77.345	74.523
28.365	105.11	110.78	95.065	97.476	83.741	107.27	92.128	125.07	70.905	108.27	80.764	113.45	79.055	99.805	84.068	113.69	113.1
50.554	57.988	54.892	45.342	56.876	52.882	61.176	52.193	57.35	36.242	54.427	43.814	61.922	46.911	64.182	50.393	63.616	64.212
30.501	53.539	54.892	42.892	54.759	49.53	50.693	41.271	54.29	40.344	52.019	22.992	54.548	36.457	58.613	37.903	63.616	58.913
44.54	43.681	51.547	41.046	47.519	36.349	37.598	27.364	46.758	24.853	40.158	32.851	46.243	36.457	58.613	37.903	45.602	46.077
83.138	74.303	80.221	74.493	73.58	70.691	72.248	62.986	79.049	51.782	72.224	46.95	83.319	60.227	66.367	44.138	67.59	66.899
35.255	46.669	47.725	43.384	54.007	39.184	42.779	33.38	50.85	30.155	39.3	32.932	47.778	40.282	76.026	35.086	45.947	44.568
33.609	53.551	77.702	53.259	49.724	52.406	37.192	61.108	44.036	36.328	50.677	45.781	60.699	48.026	64.98	32.371	43.952	34.814
53.453	77.806	77.821	76.688	69.425	73.137	72.874	71.437	76.832	54.831	81.15	45.781	86.664	65.845	64.98	60.723	76.528	70.78
39.59	38.782	68.392	37.696	42.193	30.707	42.68	23.338	42.411	30.095	49.104	41.356	42.261	39.524	29.767	32.837	36.909	44.235
39.797	41.979	68.392	38.625	49.887	38.783	40.973	34.074	39.302	27.327	42.777	32.007	44.99	39.145	32.274	35.096	34.626	38.575
36.547	48.223	72.444	38.625	52.357	49.493	41.579	49.065	43.143	38.074	35.992	37.64	66.788	68.092	56.249	37.668	39.042	51.038
113.03	78.67	139.34	78.097	84.953	70.557	65.149	64.378	63.435	50.827	61.062	56.663	90.977	76.968	90.836	47.277	70.622	59.805
45.125	61.393	78.949	54.39	53.884	58.215	60.315	37.935	63.435	36.207	60.546	49.3	71.387	60.463	52.889	40.297	56.129	58.854
49.628	48.122	71.236	37.507	46.414	38.817	44.284	37.734	50.87	25.627	37.544	42.429	69.487	48.785	38.601	38.954	34.54	43.984
36.24	44.82	52.878	37.579	50.509	42.206	40.082	39.99	45.487	32.444	31.719	29.131	55.373	42.582	42.348	30.392	41.92	47.544
34.494	35.318	42.809	29.778	45.035	32.276	36.497	35.238	34.92	24.635	28.929	28.808	33.51	26.812	32.434	30.298	34.333	39.884
26.015	65.712	64.232	79.419	70.744	50.727	72.41	42.31	61.726	36.39	61.872	53.12	66.742	60.401	57.376	70.462	64.36	70.396
36.689	69.824	83.582	79.419	66.923	63.634	67.941	43.502	63.87	40.455	83.89	70.013	59.097	46.559	55.614	61.206	61.36	77.726
43.341	54.228	55.461	46.143	58.593	48.237	48.536	43.502	63.87	40.455	51.659	34.519	55.593	35.243	54.818	34.759	58.391	44.543
33.288	27.108	28.621	23.189	28.742	25.565	24.263	17.277	27.178	15.171	36.906	23.202	24.742	24.149	50.295	25.06	21.311	29.434
49.333	41.436	28.621	51.579	49.688	47.019	40.516	36.108	49.404	33.891	45.373	23.075	44.223	25.398	36.859	29.171	32.834	44.82
68.461	59.476	70.943	51.579	58.523	50.357	63.989	36.898	67.096	37.939	53.079	45.524	55.092	52.993	66.374	57.311	54.721	61.404
66.521	50.314	50.558	36.448	48.104	41.841	43.957	35.679	57.043	32.641	45.786	44.458	46.865	38.162	47.115	47.471	45.542	60.032
52.806	49.711	44.286	36.45	41.249	42.361	43.957	40.923	45.657	37.582	41.263	26.89	47.219	26.891	47.115	34.492	50.518	51.502
55.515	52.694	39.151	63.204	41.249	60.939	47.72	62.829	51.841	41.566	47.061	24.358	58.859	26.891	56.467	34.492	49.52	51.502
33.529	40.398	40.803	44.734	37.414	41.358	38.555	37.835	40.104	37.366	37.782	25.9	42.178	30.487	40.138	32.192	44.486	51.07
40.373	34.936	49.103	37.528	37.745	30.48	32.488	49.902	34.02	24.586	35.684	31.132	38.195	29.587	37.902	33.69	40.696	42.511
64.209	68.387	58.886	65.435	56.741	63.077	65.553	54.338	63.685	47.656	65.457	37.6	68.364	45.989	68.731	58.221	79.932	68.712
34.397	41.63	31.952	46.84	45.455	40.252	37.893	34.084	40.18	26.918	42.814	23.78	28.347	28.904	30.518	33.545	31.409	42.904
76.245	57.178	53.496	60.237	52.814	56.34	50.954	51.782	52.677	48.895	63.676	36.453	69.83	39.433	67.801	45.338	67.49	64.995
66.58	57.178	47.427	36.739	52.814	47.419	50.954	44.683	52.677	40.606	55.121	33.264	64.324	42.021	81.51	45.216	61.204	61.897
33.541	29.276	30.524	30.192	32.697	24.886	28.926	23.828	32.48	18.403	31.497	24.428	34.995	27.11	50.598	29.127	31.671	32.717
33.541	46.005	35.186	32.71	41.365	39.148	37.895	44.127	41.158	37.924	55.083	26.96	50.754	42.174	136.86	32.49	45.92	34.041
34.148	29.329	31.855	26.888	29.534	30.828	32.347	22.946	33.999	21.18	29.885	20.154	31.786	22.953	40.668	25.052	30.771	31.541
21.368	17.684	17.7	22.308	15.045	17.627	18.365	11.987	21.256	11.726	22.036	14.229	18.063	15.708	35.815	16.069	17.908	18.63
39.905	34.606	32.238	31.971	29.912	28.875	34.236	29.794	33.059	22.712	36.548	29.041	42.167	41.035	35.739	33.006	33.014	40.859
37.042	31.665	29.916	27.917	29.744	28.875	29.353	24.222	29.174	20.396	36.548	22.326	33.586	26.935	41.128	31.633	32.937	36.375
55.832	44.579	56.571	63.368	42.934	33.415	48.032	48.615	57.025	35.805	42.461	35.131	49.239	44.263	73.447	46.886	48.513	46.462
58.033	53.949	56.571	72.997	42.934	54.087	48.032	48.615	50.707	39.148	47.905	35.985	66.719	45.984	119.51	40.356	63.779	55.281
49.022	47.846	45.564	42.923	45.565	46.22	42.23	41.358	45.458	33.861	49.829	37.416	51.312	39.243	52.584	40.025	45.15	45.472
26.227	35.11	42.109	26.791	37.815	23.007	36.895	24.013	34.094	22.761	37.108	24.715	39.386	38.756	36.522	31.825	27.599	32.892
35.126	37.883	36.459	30.116	35.115	34.865	37.229	29.287	37.964	27.8	37.108	23.833	42.03	34.167	54.848	32.958	34.123	36.245
45.724	41.653	36.112	41.11	41.136	36.559	38.171	33.651	37.086	27.897	39.415	43.35	42.74	31.989	66.228	39.585	45.635	49.457
55.957	51.439	45.264	45.011	47.438	47.913	59.268	33.651	54.418	33.699	55.615	46.96	55.865	47.851	61.904	44.937	52.194	61.178
103.46	102.49	127.79	51.614	92.252	77.172	103.77	129.73	108.96	74.2	102.34	72.887	111.71	91.474	93.312	74.854	87.212	105.47
51.043	43.01	48.085	33.34	42.733	35.613	40.308	31.873	41.191	27.872	37.217	37.741	44.127	52.085	45.356	39.039	45.358	44.126
57.916	48.435	52.585	42.494	44.361	48.362	44.257	33.691	48.753	32.131	50.181	37.741	49.717	41.655	64.224	40.423	53.072	51.203
47.093	47.143	58.931	40.743	56.422	46.818	47.772	32.898	50.341	24.912	50.181	38.204	60.023	46.125	77.554	42.871	45.784	53.046
42.414	40.454	51.774	31.871	51.106	34.921	43.942	31.266	39.084	24.88	35.491	32.31	40.156	46.125	46.307	38.884	31.253	44.169
61.342	52.805	77.172	35.084	67.486	46.635	54.263	53.001	53.006	30.871	40.3	53.469	58.087	53.684	46.307	50.758	36.299	48.366
34.495	36.19	30.347	28.452	34.571	32.865	36.111	23.15	33.654	22.725	39.108	30.641	35.201	30.103	46.899	39.438	35.469	41.661
35.685	38.618	45.454	32.028	39.036	32.504	36.41	27.053	34.878	22.725	34.299	37.683	40.084	36.898	37.641	37.089	39.244	42.447
34.392	38.755	39.727	49.564	39.036	36.353	36.41	27.308	34.878	26.667	37.626	32.408	41.17	43.237	41.286	39.197	41.519	37.241
22.763	34.061	34.019	35.821	37.129	33.476	32.751	33.088	31.034	24.495	36.549	24.271	45.488	44.381	35.604	28.562	34.9	32.081
19.498	19.003	18.807	26.24	16.508	22.461	20.214	23.123	18.87	16.802	22.873	14.414	25.437	28.701	24.323	18.967	21.55	17.556
46.49	40.246	39.857	42.484	35.72	38.003	40.066	30.09	39.378	26.774	37.235	28.307	39.815	27.551	35.818	38.79	36.371	45.136
47.282	54.123	46.705	54.73	49.637	47.973	54.786	31.754	55.344	35.691	52.437	27.858	54.941	36.348	51.026	57.198	49.547	52.45
66.238	56.224	57.98	46.946	54.004	51.953	51.954	43.439	49.68	46.401	36.756	45.954	63.41	50.074	58.482	61.536	44.938	50.656
66.238	77.464	94.533	65.905	88.567	68.467	74.933	49.681	77.075	46.629	63.807	71.141	67.478	73.972	69.866	84.079	70.534	80.789
218.11	133.7	140.81	95.504	129.55	107.54	115.99	99.488	119.28	87.45	134.5	89.333	141.53	95.995	138.9	119.93	139.87	132.96
40.006	33.956	31.767	32.22	37.982	37.669	30.31	28.52	30.016	32.688	35.184	25.628	36.798	27.951	64.917	35.714	44.983	38.507
33.553	33.062	28.498	41.002	26.646	35.075	34.439	27.409	33.023	24.245	31.497	22.72	35.393	22.969	34.846	29.861	39.814	34.855
45.673	45.319	63.717	57.267	58.601	35.075	60.967	28.476	56.795	24.245	54.65	42.446	45.556	46.777	43.89	48.622	38.626	49.053
81.867	69.02	81.753	69.908	82.482	59.776	77.007	47.519	80.593	41.044	69.303	56.435	75.611	77.324	61.749	65.697	52.983	64.302
49.615	53.342	52.312	40.681	45.905	42.763	46.513	35.314	48.799	32.039	56.435	35.64	48.97	51.828	47.366	53.877	50.112	59.694
116.42	85.441	80.328	79.888	79.71	79.208	84.469	67.188	83.226	66.873	73.016	52.906	85.989	72.886	86.337	65.451	94.468	80.645
80.762	44.061	38.511	45.09	39.763	37.559	43.401	34.497	42.216	43.55	42.42	37.303	49.781	38.756	43.693	45.053	52.551	50.453
40.769	54.484	70.362	39.849	47.835	42.753	52.664	51.372	48.626	44.078	46.06	56.518	56.328	68.016	46.348	52.324	63.142	63.242
39.536	48.611	51.701	39.849	51.859	42.753	49.756	37.02	49.598	32.455	47.424	39.349	51.17	39.118	45.453	46.165	43.761	60.861
102.97	98.948	127.81	69.574	130.85	70.711	78.793	69.041	82.762	48.844	109.23	91.484	107.03	92.905	89.701	83.16	98.457	80.627
40.952	33.057	38.157	28.92	40.364	27.882	31.78	27.756	32.513	21.884	30.547	28.637	34.028	37.12	30.361	32.643	34.577	35.778
50.887	55.07	49.772	53.483	55.231	51.335	53.897	44.57	73.1	40.111	50.703	44.939	56.221	45.791	56.578	46.051	49.987	59.104
59.962	45.271	49.232	39.753	56.963	52.305	45.051	33.482	47.047	28.527	43.528	35.834	55.745	47.677	43.137	37.665	45.375	47.576
59.288	45.271	49.187	45.068	57.293	52.305	43.305	31.356	46.396	27.666	43.638	39.618	55.745	58.669	31.851	37.329	45.375	44.979
42.281	38.649	44.871	35.423	53.312	33.069	34.392	29.28	36.985	19.617	39.714	29.508	41.918	39.805	36.483	34.725	37.092	40.834
45.444	49.624	55.432	42.257	48.735	42.743	56.419	41.347	54.399	32.726	47.878	42.189	47.789	43.351	50.492	42.884	44.091	55.418
23.937	39.655	61.969	29.672	78.312	25.825	40.405	52.137	38.787	21.001	33.986	27.415	46.098	39.232	27.756	27.226	39.454	33.886
33.381	36.216	33.161	36.168	34.536	27.581	38.648	25.386	31.795	26.791	30.32	29.435	35.045	42.38	33.7	35.094	27.891	43.671
28.978	25.384	33.161	35.554	31.353	22.929	30.769	21.249	27.501	16.268	23.687	19.953	24.711	26.298	23.755	22.62	21.087	28.229
39.6	56.833	50.764	57.519	57.382	50.32	73.394	41.316	59.92	36.662	53.386	41.972	58.269	44.105	51.028	42.424	52.194	56.171
33.476	36.354	32.409	42.424	31.217	41.542	33.341	27.139	37.542	28.735	39.437	30.554	41.218	30.855	42.073	22.256	37.145	38.391
37.377	38.458	53.171	40.547	48.309	37.378	42.76	33.175	38.654	30.546	37.415	36.805	37.84	30.955	42.457	31.49	37.239	48.316
56.96	51.682	57.92	46.446	57.972	46.681	50.941	40.523	50.248	39.849	47.978	33.621	58.779	48.086	88.811	40.591	60.152	55.466
56.087	40.429	39.67	43.9	31.016	42.58	43.854	40.523	43.355	33.338	36.449	29.016	43.97	31.878	50.013	29.837	42.25	46.479
52.281	29.871	41.988	35.122	28.748	29.777	32.634	26.977	30.543	22.925	27.141	30.735	33.177	31.469	39.694	30.514	27.948	40.226
46.082	29.254	33.886	26.093	30.495	24.375	29.887	27.435	29.371	19.995	26.895	27.33	31.989	24.431	34.587	29.114	30.725	40.226
45.192	46.859	41.775	47.491	39.626	41.421	42.802	39.904	66.608	33.09	46.055	31.005	44.75	31.319	125.8	33.69	48.642	48.864
58.162	52.022	48.855	45.216	46.292	44.086	48.875	38.926	49.157	38.08	47.713	36.222	51.931	36.345	103.82	42.947	51.559	55.887
54.898	38.753	36.401	33.575	42.548	40.983	38.369	44.406	39.013	36.485	34.934	28.368	38.77	30.702	50.667	32.078	38.972	47.487
73.037	51.92	46.91	50.197	49.948	47.464	47.292	46.966	51.497	43.337	52.459	32.894	52.637	39.833	52.132	40.881	57.513	59.464
52.749	45.797	46.91	37.467	40.115	39.405	43.277	33.165	41.617	30.601	42.105	35.203	44.909	47.377	42.035	42.838	45.024	53.185
56.858	55.314	60.377	55.066	55.365	39.126	47.724	39.622	49.74	37.35	44.508	72.613	44.648	53.567	48.238	47.91	52.904	55.784
37.817	33.737	43.2	28.191	46.67	27.351	42.741	23.782	25.255	17.044	31.809	28.822	38.341	36.215	50.884	33.975	26.126	25.458
37.817	33.737	36.892	28.191	35.916	22.19	36.816	23.782	25.255	17.159	31.809	22.987	40.94	26.122	35.553	28.63	25.307	25.458
39.294	56.944	68.488	59.855	63.119	49.133	39.432	33.116	52.082	31.41	43.18	46.949	57.621	62.642	50.913	48.715	36.699	45.039
39.294	54.404	54.718	44.04	51.638	44.147	39.432	33.116	47.748	31.41	43.18	45.621	52.158	44.93	50.772	48.138	36.699	45.039
50.865	37.4	36.931	41.477	35.428	42.871	38.425	43.484	35.151	35.902	40.986	34.491	39.339	33.163	54.246	33.157	40.737	45.234
44.575	37.4	36.931	25.964	35.155	32.53	34.483	28.3	33.818	25.145	40.986	28.864	38.364	33.163	38.557	33.157	35.616	42.891
37.344	39.589	36.53	47.694	35.155	32.236	41.768	28.892	38.521	28.462	36.213	34.093	39.35	35.714	48.566	41.95	43.702	42.891
51.557	39.589	40.264	27.96	39.533	37.984	34.112	28.892	36.766	23.635	37.998	34.093	39.35	36.745	40.393	41.95	43.702	39.716
37.316	29.481	32.823	23.933	28.921	23.324	29.589	20.159	29.83	19.154	28.278	22.178	27.017	23.936	27.936	24.507	28.445	28.916
36.654	30.222	35.636	37.483	28.729	26.197	32.98	23.701	32.034	19.154	29.83	23.88	26.118	31.121	30.324	25.591	26.915	31.455
45.039	29.436	33.947	27.575	31.036	26.197	28.214	21.672	24.434	16.947	29.83	26.722	30.213	29.907	29.867	30.505	35.183	28.942
55.483	40.682	44.017	46.616	40.742	44.468	33.122	33.184	45.147	33.735	41.783	29.698	43.395	29.907	43.706	35.567	47.459	48.825
26.113	25.141	26.547	18.653	26.633	25.442	21.134	20.069	25.49	15.996	21.609	20.896	26.551	21.437	24.905	22.401	34.019	29.136
50.062	43.226	55.289	44.809	43.265	52.841	36.187	31.428	43.821	30.191	40.082	33.812	44.509	36.034	46.571	42.544	45.606	34.88
59.691	32.001	33.315	34.49	30.585	28.458	32.211	19.533	32.361	19.579	28.843	24.255	30.381	31.467	32.177	27.135	31.423	37.566
40.466	24.821	29.184	48.025	23.122	25.085	28.01	17.987	35.854	17.029	26.347	24.255	26.98	23.488	26.012	24.235	26.913	32.565
34.992	34.923	30.864	43.523	31.683	29.654	32.862	39.064	37.475	27.451	38.671	22.058	33.257	22.624	32.49	29.19	32.406	35.134
30.517	21.043	20.602	16.523	20.056	22.044	21.935	32.938	21.019	14.053	23.417	17.81	22.786	16.297	21.868	16.077	20.177	22.176
26.376	34.865	29.609	31.974	32.238	31.694	32.722	41.608	34.86	25.724	29.993	28.549	37.311	27.015	36.336	28.996	36.74	37.919
23.837	22.181	25.086	30.818	21.748	17.178	25.306	50.573	30.036	16.087	24.72	18.18	29.84	27.337	29.035	22.563	26.256	22.608
43.422	38.368	40.177	31.218	38.053	33.206	33.905	24.047	41.844	21.201	37.605	32.131	39.606	34.966	33.147	29.453	33.055	40.81
70.995	36.624	36.051	30.944	36.888	41.905	36.972	30.34	34.335	24.793	33.041	27.81	36.316	45.384	36.972	43.129	36.127	38.115
60.314	34.652	34.951	29.499	37.057	41.905	41.807	30.34	34.942	23.274	35.502	26.11	34.402	30.818	57.642	41.689	33.687	35.533
59.271	51.316	77.324	42.17	60.948	43.041	45.573	45.16	50.251	34.236	44.5	38.813	55.792	52.167	40.469	35.708	50.448	40.594
44.03	33.674	38.738	42.17	32.708	35.454	51.98	26.328	36.743	22.199	29.31	25.688	30.842	25.239	26.557	28.511	32.144	34.362
33.946	30.341	27.712	24.625	24.745	25.274	38.679	23.29	29.109	20.243	28.048	24.472	29.53	23.876	57.293	25.13	31.827	29.691
41.982	44.469	49.526	32.9	42.889	37.187	38.679	32.352	38.863	28.156	40.041	29.772	46.641	42.225	45.516	42.109	48.112	44.078
58.321	52.535	52.618	40.633	50.427	44.635	55.943	35.591	51.949	36.509	44.635	41.725	59.883	48.843	46.435	50.013	50.292	56.74
68.276	71.26	71.429	71.608	58.407	61.586	86.342	63.082	56.584	42.778	72.403	54.389	82.783	73.653	69.601	70.155	61.347	89.272
59.884	50.737	61.156	41.312	49.66	47.709	47.013	39.431	71.13	34.289	44.683	37.682	50.329	43.653	54.049	44.075	48.509	56.103
41.912	50.869	58.323	49.475	45.893	42.718	41.715	39.743	65.511	35.361	35.086	34.597	43.847	33.275	51.431	37.566	47.259	50.587
38.763	36.403	32.703	42.29	32.625	31.646	35.59	46.151	39.084	24.709	33.737	28.698	35.701	28.594	60.192	30.903	32.1	42.242
46.887	58.045	51.038	64.874	50.014	63.285	62.783	68.611	55.969	57.792	52.539	40.62	60.963	44.025	60.088	47.801	64.951	70.049
66.169	54.067	56.998	48.504	50.315	48.472	50.079	48.423	44.504	37.353	49.902	40.673	60.081	49.293	51.042	48.607	56.299	55.775
44.798	54.922	79.562	65.322	66.471	60.263	56.859	44.444	48.756	45.019	63.654	49.118	63.421	56.752	46.255	45.976	52.985	53.649
45.535	56.411	45.903	49.883	41.834	57.24	53.084	44.444	52.589	41.948	53.283	32.85	62.306	41.387	54.209	39.843	52.985	57.439
30.362	34.145	30.874	40.237	30.062	32.129	35.825	67.519	32.777	35.922	35.481	25.598	41.247	24.055	43.352	26.99	40.542	37.192
50.082	40.222	40.421	44.072	36.276	42.967	39.906	41.264	45.513	33.288	42.484	36.179	45.551	32.956	46.095	31.558	52.157	39.873
90.269	68.59	75.54	65.093	78.684	64.593	79.284	50.556	61.971	41.632	84.706	43.374	89.256	48.936	82.831	55.172	90.477	92.249
81.365	67.142	59.141	65.093	66.215	66.108	68.718	58.425	68.757	50.781	62.316	36.81	77.937	51.969	60.924	50.522	68.27	75.464
89.644	57.494	60.62	48.322	51.906	44.392	49.986	57.642	51.929	45.658	48.149	38.709	67.163	76.101	55.358	50.952	54.265	51.51
82.16	73.529	64.351	61.529	59.959	63.732	64.02	68.312	77.492	55.572	78.058	51.199	83.124	85.323	78.537	62.253	80.338	69.393
28.065	66.838	59.773	57.859	59.959	54.528	63.241	50.514	53.564	46.243	62.164	51.199	69.353	63.476	63.034	56.021	64.433	56.842
22.132	27.028	28.698	22.185	26.455	23.163	26.154	20.696	28.867	21.301	23.675	24.566	24.904	21.992	32.058	24.477	25.791	28.274
38.748	23.04	27.377	20.897	21.134	21.015	23.824	16.15	22.073	11.786	20.426	21.214	22.365	21.126	35.959	23.679	22.426	25.528
58.831	24.957	28.091	25.74	20.731	26.141	22.662	20.421	22.611	17.843	23.76	17.835	22.753	23.94	26.579	28.452	20.124	23.032
58.831	31.361	28.692	43.833	34.974	28.425	35.887	20.421	33.758	17.843	33.864	26.221	25.84	29.287	55.178	28.452	25.828	40.568
47.541	41.649	43.873	32.855	38.469	34.876	38.584	38.089	41.648	30.88	37.228	24.556	44.249	30.81	73.347	34.904	44.125	41.74
62.682	45.008	43.678	33.23	47.635	37.084	36.83	40.4	39.179	25.258	43.924	36.284	48.453	34.418	63.454	39.334	41.953	42.175
69.817	56.943	72.636	43.383	63.988	47.213	57.93	40.881	60.241	34.716	62.525	49.671	58.348	44.073	56.704	49.384	47.435	54.395
41.616	47.121	53.001	38.708	47.282	45.095	51.16	33.067	45.736	26.809	45.477	40.488	43.244	44.073	41.494	42.132	40.991	51.033
35.949	55.435	74.822	63.163	48.671	50.406	84.597	49.766	73.846	44.932	51.612	34.672	46.03	44.464	56.91	46.429	42.635	59.637
48.037	44.768	67.12	30.609	44.522	36.86	45.798	51.511	46.321	31.041	42.96	38.632	48.115	60.505	57.594	44.975	40.183	40.826
44.949	49.12	48.092	43.45	39.664	41.946	48.861	34.708	46.777	33.073	46.056	31.764	50.804	31.621	51.894	36.786	49.155	54.619
77.78	48.049	45.071	38.503	39.664	39.701	52.167	34.708	48.073	26.62	38.722	31.764	46.035	37.004	51.989	36.786	41.795	67.697
64.223	56.62	59.831	39.653	49.934	51.956	54.744	50.463	42.279	54.143	52.134	44.399	64.436	65.036	47.681	50.576	49.919	48.273
22.815	28.939	67.032	34.886	36.057	27.621	30.232	22.639	26.482	19.634	24.17	21.13	45.364	29.566	33.249	23.739	31.851	30.165
71.664	33.824	37.896	31.707	36.861	30.879	30.661	27.919	32.811	21.353	36.922	23.938	45.699	29.566	37.672	27.469	35.671	34.045
31.213	28.369	31.811	18.484	29.452	22.197	24.566	23.306	24.245	19.723	27.699	24.638	33.587	31.518	27.059	35.833	28.757	27.086
30.485	27.449	22.442	26.549	22.216	27.4	26.859	16.576	33.09	20.254	28.976	18.284	32.896	21.428	24.671	28.971	23.56	37.01
56.701	53.487	48.33	41.02	48.771	40.153	48.229	41.58	45.192	30.971	37.629	39.62	53.957	43.78	55.157	45.148	45.234	46.991
42.706	29.967	27.965	34.88	24.779	33.63	25.901	24.35	33.517	26.041	42.226	18.7	28.569	21.508	28.146	21.453	33.303	33.757
74.232	48.188	38.817	55.217	44.525	55.388	42.806	40.903	59.027	38.941	62.149	29.431	48.385	40.834	49.545	41.962	54.159	53.738
44.863	24.57	26.275	24.574	28.462	22.535	27.468	25.326	33.3	17.323	21.392	18.858	25.496	17.849	28.782	21.574	26.862	24.257
55.364	48.529	46.268	44.399	38.445	47.814	60.319	39.707	50.603	31.103	48.417	31.358	45.44	27.925	43.776	34.159	41.169	45.043
62.248	49.962	45.329	50.147	44.761	48.902	48.791	47.064	47.747	41.587	60.078	34.444	51.661	38.536	54.331	40.773	61.858	47.025
75.311	58.137	58.409	42.423	51.222	40.801	57.299	54.237	53.21	37.367	49.522	36.48	62.612	41.571	51.59	44.146	59.44	49.471
60.801	48.843	37.993	53.944	53.12	51.753	57.299	62.003	51.013	28.934	51.368	34.176	47.224	36.16	61.038	39.779	40.191	45.97
76.562	52.412	49.116	51.154	44.808	48.06	60.203	40.8	52.751	35.465	44.351	36.38	54.473	41.901	61.038	41.419	55.004	52.833
75.523	46.928	42.07	48.385	43.7	44.51	44.433	38.358	43.557	35.312	41.904	28.101	49.894	37.589	47.474	40.131	52.952	43.577
44.25	32.066	27.875	28.609	35.118	30.514	34.673	24.462	31.372	22.963	26.052	22.254	32.489	30.41	33.75	24.484	35.462	30.281
51.459	98.541	90.178	73.026	85.848	79.904	92.569	71.193	97.946	64.986	99.024	58.953	92.34	70.721	156.9	81.217	90.843	111.5
47.482	55.477	55.817	38.512	60.099	38.154	46.069	43.796	50.891	39.097	43.509	45.794	43.007	44.532	64.785	44.636	55.081	53.872
67.992	100.6	105.48	115.86	103.95	84.286	119.19	78.411	103.82	64.791	86.588	63.876	102.75	90.504	102.14	79.265	99.742	104.45
38.967	66.152	67.57	73.865	80.886	61.837	62.411	45.906	67.675	40.187	68.782	54.896	67.54	55.89	46.005	54.177	62.131	66.054
64.473	73.587	81.546	77.083	89.249	64.574	72.484	52.168	74.556	40.187	64.745	59.298	70.95	55.89	56.991	58.076	66.636	70.717
83.398	48.298	37.824	46.392	39.112	55.671	36.361	62.823	38.469	53.487	51.315	26.598	63.055	35.662	80.889	36.346	77.765	46.92
83.398	67.805	51.145	63.571	59.328	67.705	61.205	59.03	64.585	53.487	59.435	43.364	63.055	48.346	52.485	52.832	57.964	50.742
112.08	67.805	80.586	92.648	79.757	73.666	78.159	76.018	94.144	76.784	68.323	91.87	57.099	77.615	56.756	62.864	65.491	66.634
112.08	69.114	84.525	73.184	72.114	64.246	68.1	59.881	79.774	50.967	68.323	81.944	68.068	79.59	65.536	62.377	74.831	67.443
70.022	53.671	57.757	64.14	48.247	47.968	49.001	51.578	52.086	40.59	46.264	42.338	56.235	50.588	57.817	39.731	62.354	55.194
226.17	73.045	87.119	77.718	77.46	75.964	69.789	69.124	72.673	78.946	71.905	112	67.512	108.62	73.582	85.157	77.008	76.827
171.3	120.76	125.81	119.94	134.33	130.49	122.83	121.19	142.35	113.23	117.44	143.24	113.58	106.01	146.42	106.4	96.999	109.23
154.84	95.028	115.62	99.589	115.66	96.19	104.11	98.188	120.14	111.81	87.218	128.94	97.988	106.01	93.239	106.4	75.194	98.786
140	159.32	205.53	154.27	182.94	142.04	181.09	156.14	164.85	136.57	121.26	244.98	110.13	240.33	107.97	198.04	89.656	150.99
115.71	84.444	95.154	134.36	93.401	124.32	113.97	150.94	141.25	169.02	82.984	63.34	87.764	68.7	92.793	70.81	104.16	86.446
91.291	79.99	87.273	80.25	87.033	72.136	93.051	100.2	72.997	69.942	82.984	76.228	77.113	82.548	75.944	79.264	61.78	86.446
69.826	76.459	75.357	95.487	64.85	80.537	73.76	60.495	72.997	44.355	68.133	62.864	67.83	72.615	72.418	69.566	64.828	69.915
147.38	81.291	102.74	102.77	85.483	88.304	94.969	66.267	104.5	85.542	89.189	70.577	80.159	81.898	80.123	80.196	80.721	83.991
148.74	103.11	106.21	123.36	94.3	123.12	90.238	134.87	109.71	140.78	116.46	118.9	122.51	113.61	121.52	100.53	119.47	104.04
162.44	101.69	134.69	107.07	153.19	97.49	124.01	95.873	101.89	103.33	106	145.74	107.65	146.71	107.95	136.34	120.36	113.24
157.52	104.23	134.69	124.73	123.27	119.25	111.64	121.73	108.62	113.35	88.123	145.74	92.995	135.46	85.278	108.16	88.821	101.15
297.45	110.21	160.06	53.056	138.92	52.185	120.51	85.245	91.271	59.442	123.74	180.1	101.94	184.67	98.017	172.23	95.56	133.75
105.6	108.27	132.86	77.701	121.71	88.471	101.58	103.65	104.25	86.398	110.13	107.83	101.94	105.66	98.017	105.25	103.27	120.45
54.086	66.287	71.769	66.555	70.774	54.359	69.643	62.659	53.224	37.529	52.352	51.997	75.033	66.478	51.505	46.633	53.889	61.91
45.151	86.239	85.502	65.805	92.198	73.333	88.04	69.582	84.228	63.544	87.232	55.687	97.973	73.964	94.603	65.011	88.436	82.56
48.24	60.184	62.02	43.712	66.676	52.917	52.549	43.764	55.365	38.118	50.714	47.436	69.781	56.478	53.033	51.841	48.681	55.801
48.24	60.331	67.61	47.638	49.527	46.562	46.87	47.425	61.074	42.424	58.061	32.589	60.237	50.924	62.959	44.026	59.195	56.117
23.143	28.263	30.157	32.909	31.486	26.464	25.056	19.838	24.359	19.108	30.604	23.776	30.923	28.477	31.707	24.755	30.54	30.047
51.414	42.779	46.63	28.727	42.679	28.931	39.081	22.462	33.71	19.235	37.85	44.612	43.162	57.998	42.577	43.799	31.389	50.761
77.182	61.944	50.405	58.312	53.948	68.769	66.563	48.424	57.347	49.706	47.012	44.231	81.044	65.52	73.308	44.677	53.655	63.831
46.235	111.06	114.09	116.3	102.56	116.02	129.82	94.632	121.75	74.264	97.725	69.668	99.486	64.131	87.741	73.56	88.976	94.677
49.9	95.228	114.09	83.614	111.79	91.629	84.528	77.49	94.983	71.076	60.121	63.888	88.121	81.839	65.889	84.2	59.314	70.577
44.582	70.645	81.704	51.928	69.285	59.159	81.283	48.429	68.76	40.841	61.592	59.671	88.121	63.398	60.865	62.321	53.568	74.639
31.761	99.985	117.25	87.054	85.685	83.263	109.22	78.716	90.489	64.331	88.756	73.314	106.82	81.7	93.165	80.113	90.953	86.456
22.891	119.75	117.74	120.96	108	105.38	113.52	97.281	114.19	88.839	120.62	53.679	133.68	73.631	122.58	86.22	121.71	126.7
51.286	30.048	45.397	29.44	42.132	33.815	44.27	23.631	50.533	19.449	31.431	18.992	28.294	20.539	57.501	26	35.665	30.907
60.01	75.431	76.883	77.699	69.508	67.526	76.223	66.64	82.989	51.084	73.826	45.783	74.344	52.967	132.55	61.051	86.708	75.443
42.676	269.03	300.38	320.59	298.75	343.12	201.45	203.07	253.41	198.66	250.95	205.75	221.29	173.65	281.27	291.36	192.33	260.24
45.486	109.33	133.89	114.16	139.47	125.93	105.75	100.9	111.31	83.48	79.274	94.019	126.63	97.721	89.574	100.91	122.21	79.752
88.566	74.985	59.694	68.977	61.601	74.755	62.279	98.812	64.417	83.48	55.544	55.365	78.339	51.437	84.151	55.97	99.715	69.047
57.451	94.732	85.093	114.52	84.397	97.03	82.651	74	76.61	78.117	66.7	74.794	105.89	84.795	87.306	88.413	82.401	71.105
36.716	43.272	55.591	30.377	44.549	40.307	35.836	40.297	43.705	35.554	42.009	26.473	50.378	36.849	55.736	35.128	52.179	41.676
84.082	128.43	187.97	145.01	127.7	116.42	113.71	151.71	114.64	104.51	97.365	87.392	143.29	113.55	184.23	86.525	79.772	88.404
83.647	50.797	51.582	41.381	52.497	45.737	50.091	47.367	47.778	39.122	54.13	42.487	55.774	46.758	58.683	48.204	66.394	51.52
58.882	45.836	57.038	37.921	39.439	36.924	40.212	31.016	38.016	27.328	49.39	67.945	44.075	68.93	68.173	63.123	49.266	53.792
57.554	45.836	37.06	43.005	38.924	47.276	40.212	39.41	39.581	38.144	49.39	33.402	51.324	42.337	121.29	47.918	53.505	49.792
85.29	76.147	82.972	51.009	72.315	57.777	73.678	46.343	62.727	53.179	75.026	58.845	84.151	70.809	98.362	73.002	67.912	79.103
87.169	80.795	95.32	65.942	73.73	72.847	75.213	67.463	71.587	62.671	78.252	58.333	83.256	67.813	78.705	75.428	79.298	79.103
40.613	33.905	31.13	27.872	33.329	33.403	32.577	27.085	32.153	25.242	34.79	25.303	36.532	24.614	35.529	28.05	36.379	37.332
31.139	30.634	31.13	23.659	29.82	24.882	28.82	20.839	29.725	18.188	31.033	26.088	32.507	23.325	30.515	27.306	32.139	32.091
24.404	27.117	29.055	25.344	26.489	27.79	25.532	22.782	23.875	25.074	26.413	21.14	29.15	19.544	28.447	20.92	34.56	25.754
33.498	20.297	22.067	21.199	19.538	19.332	19.882	18.118	23.041	14.286	23.517	18.279	25.187	21.589	19.495	20.384	17.735	20.632
42.239	39.955	40.16	37.319	37.947	32.099	45.342	28.78	34.936	22.978	36.957	23.759	37.511	29.253	77.816	35.388	39.143	44.011
23.753	14.399	12.278	23.078	14.541	16.144	17.097	14.82	17.842	11.817	14.459	8.8049	14.049	14.425	27.35	13.888	17.953	16.093
33.391	29.051	31.491	31.434	28.987	26.184	28.414	23.69	29.014	21.074	28.666	22.792	28.496	25.609	44.548	23.054	29.63	29.044
28.877	23.372	26.193	31.261	27.045	22.675	24.863	29.338	23.577	19.254	24.051	19.536	25.978	20.242	28.447	22.212	27.554	24.874
28.051	17.287	15.904	13.52	18.414	14.767	18.453	17.311	18.778	13.377	18.201	11.44	19.305	15.149	17.938	13.926	20.648	19.287
37.267	29.204	28.251	31.163	30.346	25.628	28.152	26.012	27.177	22.535	26.484	19.092	31.938	20.788	31.769	24.771	31.049	28.964
36.46	28.161	24.25	31.163	25.202	32.975	28.364	25.481	33.535	22.535	35.614	16.843	27.78	21.354	26.432	26.353	28.323	28.786
35.977	27.824	27.964	30.758	24.558	27.202	28.364	22.424	30.159	19.002	22.771	25.279	25.901	19.292	25.81	23.005	26.177	28.855
44.478	62.879	57.438	53.883	45.116	46.185	68.216	38.991	59.644	36.307	50.476	41.073	65.184	53.045	55.735	56.187	61.556	53.727
53.43	62.879	50.984	59.586	52.679	48.864	79.757	61.611	59.644	53.779	49.675	36.178	65.659	74.409	76.634	52.977	70.617	52.842
55.658	76.15	75.763	62.203	67.46	62.596	103.07	68.238	77.244	61.494	53.196	51.861	83.272	101	108.7	54.129	61.537	71.11
29.946	24.319	21.299	25.718	20.147	22.236	23.354	27.987	24.867	20.291	21.958	14.667	27.874	21.906	26.079	21.373	34.36	21.855
28.2	24.608	16.665	23.473	21.302	26.276	20.811	26.481	21.896	25.969	23.039	13.377	29.817	17.478	29.771	19.072	32.62	23.218
37.659	35.106	30.463	48.203	27.317	37.346	34.54	35.084	38.299	32.076	34.342	19.765	40.545	24.898	60.202	26.808	45.803	37.735
45.041	31.961	28.383	29.816	24.638	34.539	38.696	30.38	36.08	24.334	32.461	20.546	32.799	21.502	32.867	28.43	34.931	34.268
47.98	28.432	22.364	24.378	21.916	27.192	26.483	28.728	28.203	23.442	27.761	16.575	31.037	22.515	40.87	25.921	38.862	31.324
43.59	36.88	36.827	42.15	35.656	35.696	36.249	37.128	37.588	32.009	37.463	33.265	37.654	32.456	33.876	31.943	44.778	39.948
45.016	33.927	31.631	30.677	28.898	29.156	34.532	29.2	32.529	23.377	33.802	27.142	35.235	26.1	35.404	30.647	41.527	36.994
46.313	39.109	33.869	52.533	29.329	48.468	48.129	44.044	41.541	34.511	36.294	27.271	43.887	26.1	42.737	30.647	46.943	40.375
27.629	17.644	15.184	24.369	19.872	18.105	18.683	18.405	19.209	14.394	19.432	12.522	15.821	14.777	34.344	17.949	25.308	14.688
57.901	40.488	34.954	33.85	36.681	36.94	37.976	30.449	43.192	26.958	39.969	23.355	43.234	26.455	43.447	35.032	50.135	42.477
57.901	29.252	22.191	37.076	24.843	35.425	29.82	38.707	30.768	34.361	30.496	17.518	31.039	23.369	43.234	24.676	38.277	30.52
45.706	33.087	32.507	33.215	33.288	33.548	30.819	31.902	33.888	31.856	31.434	23.038	34.344	25.298	40.184	30.257	35.062	38.351
45.706	33.087	39.633	31.8	34.839	30.81	30.819	35.34	39.007	32.712	33.369	23.995	34.344	28.167	56.886	30.878	38.506	41.98
33.663	20.48	18.139	51.727	19.971	28.191	20.155	21.423	18.888	17.321	21.96	12.67	20.737	13.931	20.278	15.465	22.205	21.325
27.86	19.815	20.308	34.284	19.804	25.488	19.115	31.167	28.209	23.801	17.852	14.642	25.851	16.767	21.312	18.135	28.153	23.113
28.549	19.815	18.037	16.657	17.826	22.477	18.489	15.523	25.357	15.208	16.637	13.606	23.702	13.68	21.312	15.55	23.509	20.368
40.631	76.805	61.077	55.364	80.818	67.556	76.091	55.567	72.386	49.825	57.923	54.511	76.704	84.321	86.786	68.211	75.493	67.086
58.007	55.598	53.038	47.135	56.475	49.721	53.272	50.292	53.106	46.457	51.179	44.671	58.834	42.055	73.394	45.941	61.431	58.965
46.062	51.128	39.087	50.26	49.391	40.884	44.653	40.401	45.022	33.468	43.43	33.521	48.304	43.991	59.969	37.055	49.341	52.302
109.63	53.546	86.483	47.611	85.516	50.622	44.653	37.325	59.259	31.89	58.274	54.541	67.978	65.022	53.151	55.755	49.776	52.302
82.731	47.782	42.384	32.557	45.68	36.476	41.687	35.561	48.165	34.287	48.103	31.63	64.232	38.717	65.214	39.556	47.975	49.412
35.171	35.806	32.802	43.01	38.377	31.461	27.556	24.933	25.969	19.007	26.817	23.398	43.631	37.804	30.997	27.356	32.951	30.812
37.334	42.276	43.806	32.597	52.162	32.195	34.888	30.809	41.125	24.547	35.918	30.66	37.854	34.945	46.389	34.084	34.709	37.961
50.831	52.805	51.687	45.124	55.036	47.749	58.544	32.559	53.79	29.397	47.765	37.939	51.359	46.188	59.028	49.211	50.888	55.796
41.924	45.448	47.522	44.04	38.548	43.709	43.721	39.037	45.863	39.415	41.147	35.03	45.927	30.141	51.37	35.432	48.874	50.914
66.163	71.956	70.817	58.339	58.78	60.851	70.695	53.779	69.641	59.535	72.98	73.373	72.675	81.337	64.541	79.52	58.662	79.928
81.138	84.85	77.39	86.505	53.005	87.697	66.853	91.604	68.756	92.418	93.082	56.043	100.53	61.907	99.611	66.911	105.17	80.541
98.012	94.601	77.912	88.897	60.914	88.964	65.869	90.772	68.756	90.764	92.199	72.121	91.998	77.64	93.328	73.855	99.625	84.205
186.3	131.33	127.6	133.24	146.25	122.65	128.6	98.496	128.21	89.697	130.98	97.456	147.79	96.27	146.78	101.28	131.53	128.75
108.47	85.48	99.222	113.51	85.782	95.678	82.769	108.04	79.111	107.39	73.905	109.02	83.616	99.852	87.56	89.844	92.05	75.656
137.79	120.19	129.84	83.53	133.58	84.191	112.59	85.855	105.95	73.519	127.07	142.23	114.05	138.61	103.91	136.9	96.664	103.53
152.02	128.43	141.56	166.92	142.81	104.56	127.86	163.09	131.07	115.77	147.94	155.4	123.37	167	109.71	150.71	96.664	151.93
207.85	176.32	160.42	177.97	139.13	189.66	172.1	184.14	187.79	151.21	161.07	155.4	173.97	150.61	151.67	150.71	165.63	156.49
115.04	63.404	55.426	51.612	56.596	54.479	69.938	56.289	65.847	41.21	71	60.346	67.533	49.276	90.178	52.045	61.246	72.691
99.751	87.585	71.952	68.288	79.003	73.487	96.337	61.532	78.645	62.426	88.805	67.223	92.418	74.509	84.857	78.142	83.45	86.308
63.505	59.846	69.38	62.403	56.024	45.842	56.396	39.365	57.053	37.284	57.042	61.464	50.778	74.509	43.592	77.303	39.86	59.829
53.183	39.501	36.399	48.275	40.051	44.705	33.807	44.902	42.309	39.401	42.487	25.338	44.428	40.134	46.267	46.764	41.691	43.187
81	52.821	49.463	68.201	45.519	83.875	67.271	71.135	60.448	53.107	48.957	67.16	47.378	70.975	49.377	60.798	53.509	51.962
130.9	93.466	111.63	74.792	107.23	85.024	88.657	79.2	87.86	80.86	106.01	132.25	102.13	132.33	109.9	116.91	104.55	96.788
167.96	190.48	151.48	172.62	142.61	180.29	194.65	180.24	193.97	169.22	194.93	171.9	179	178.96	163.07	184.5	157.24	192.59
182.92	79.974	118.02	66.156	95.517	74.861	82.459	172.01	70.816	111.86	100.65	117.49	90.007	113.23	84.581	117.54	93.675	106.13
152.34	95.207	101.48	97.098	98.875	85.213	104.36	95.056	115.74	87.391	111.21	129.42	77.413	141.72	71.611	135.41	66.89	119.18
159.93	89.281	117.86	75.931	102.71	85.213	110.17	95.056	88.952	93.695	92.563	96.544	75.425	97.029	68.998	111.09	64.535	90.406
118.22	102.79	110.28	107.33	105.51	108.36	93.948	127.61	88.952	139.7	97.851	135.14	100.66	118.51	95.478	112.84	101.95	86.566
78.534	94.832	99.321	99.233	96.35	90.419	101.34	99.773	100.1	111.18	71.873	118.87	86.532	106.48	80.185	92.374	75.205	79.988
92.185	85.232	93.332	93.569	73.9	68.164	93.813	66.226	90.431	61.388	71.887	107.73	68.436	80.212	60.02	74.522	57.609	79.988
79.384	81.235	91.969	82.002	79.213	81.678	78.018	76.294	80.865	81.83	67.08	109.96	64.137	82.977	64.659	69.799	92.342	78.954
157.9	145.06	164.28	165.8	146.99	170.31	159.19	169.42	156.11	163.75	147.93	156.9	139.66	166.57	134.45	191.09	133.4	157.34
146.97	142.9	114.38	165.8	124.39	151.81	156.48	151.31	151.67	147.16	133.43	112.89	136.91	130.51	120.1	130.81	112.12	141.45
85.265	85.067	88.03	91.228	81.364	81.627	82.68	109.37	77.645	101.45	85.651	98.612	95.486	90.961	101.19	79.889	105.71	81.611
172.8	96.199	94.004	90.612	83.399	99.626	85.695	98.046	83.931	101.77	118.79	103.05	117.89	105.46	107.69	104.89	106.28	111.1
174.78	174.78	176.58	183.44	144.9	184.68	153.39	147.48	148.63	137.89	173.08	159.98	183.83	153.97	184.66	157.24	162.33	160.56
99.367	137.19	176.58	110.17	138.44	116.91	135.19	102.66	115.62	99.182	136.88	173.04	142.35	149.19	139.81	142.94	113.34	133.93
147.2	89.212	105.47	84.43	89.032	91.961	77.784	87.882	92.425	84.911	92.372	112.51	81.86	116.64	80.914	103.84	82.24	85.231
141.3	78.185	96.189	104.64	84.234	93.886	78.812	116.24	94.06	90.496	88.052	99.16	79.69	87.065	111.18	85.164	86.049	80.087
218.56	141.41	151.06	147.97	164.66	144.65	153.69	108.15	169.6	116.19	152.95	158.52	148.24	206.64	163.02	164.96	165.02	161.52
102.16	60.07	75.168	79.652	57.856	86.227	51.135	83.834	45.074	105.77	73.273	88.738	92.307	96.615	91.82	81.677	94.966	72.83
126.65	76.358	70.961	77.629	76.132	77.873	68.682	81.078	87.731	99.103	88.283	84.915	80.036	84.512	71.799	85.296	87.17	82.271
127.05	174.42	178.95	105.04	161.91	115.21	142.9	99.12	129.94	92.647	155.26	204.65	148.69	222.23	131.23	204.26	116.78	165.74
138.43	155.29	164.1	138.75	151.01	164.8	148.76	141.69	147.18	125.61	155.26	187.27	148.69	177.87	131.23	151.23	130.31	142.09
143.4	125.94	124.55	148.45	113.04	142.23	148.55	127.03	138.29	122.22	147.3	119.88	119.02	143.06	125.62	150.05	119.93	125.27
131.43	117.5	113.36	98.463	128.11	93.209	121.25	73.429	119.03	63.912	116.71	102.21	113.22	133.48	101.72	118.39	92.149	132.02
75.853	96.709	83.236	111.42	65.883	111.01	81.76	171.31	100.74	76.141	105.15	101.34	106.21	125.88	87.266	108.75	88.723	110.6
140	109.02	129.2	98.349	117.61	107.78	107.69	114.11	107.3	105.67	115.5	162.16	115.88	131.9	116.99	128.01	122.37	119.1
209.9	112.02	162.94	91.709	138.65	107.78	119.3	114.11	103.59	122.62	126.88	163.68	115.88	180.96	123.84	190.17	111.5	137.04
134.91	112.02	131.14	122.11	121.41	109.51	119.3	121.9	112.89	136.98	113.74	149.66	111.52	136.66	106.72	123.74	111.5	104.09
142.68	132.76	140.62	143.84	126.93	143.09	122.29	203.57	137.08	201.39	136.24	144.32	148.64	134.63	184.77	132.89	176.87	130.05
82.652	78.142	74.491	83.018	73.678	86.722	84.289	95.05	83.323	113.53	77.146	44.554	96.411	55.969	120.49	59.98	103.05	75.788
132.69	52.657	74.348	76.7	73.387	75.411	81.984	86.087	71.98	70.364	49.881	62.068	52.517	58.174	56.322	56.505	56.231	44.073
118.91	115.55	94.921	130.18	112.13	114.98	120.7	110.62	128.69	109.56	118.79	100.25	116.65	93.106	107.86	104.11	105.18	115.57
128.48	110.18	120.69	105.57	100.72	109.15	101.14	102.95	92.677	97.881	108.53	172.66	96.767	156.89	93.115	156.13	92.918	121.33
102.6	162.69	176.84	151.71	170.55	151.02	163.18	148.06	169.45	117.46	130.19	170.15	121.16	167.1	167.68	152.71	127.31	152.81
278.24	211.14	248.28	158.44	214.14	166.21	202.88	158.78	201.71	130.23	208.22	277.1	207.12	255.12	168.74	248.01	148.12	226.34
119.51	168.98	143.67	141.02	141.02	148.47	136.25	167.02	156.63	162.08	153.73	143.13	172.53	151.71	156.45	150.53	168.87	136.45
193.29	125.25	139.34	145.85	120.38	139.87	127.09	132.3	141.41	154.93	131.6	160.04	129.01	143.25	126.79	135.87	122.45	114.56
175.3	145.56	144.37	123.07	143.86	132.44	133.72	128.12	131.68	122.01	142.91	164.26	144.3	163.42	143.9	143.92	132.43	134.33
101.03	99.783	95.796	111.63	81.222	99.287	74.627	113.4	71.173	112.74	119.34	130.52	111.39	132.17	122.58	136.2	131.19	103.18
177.45	123.31	165.94	81.136	157.42	83.265	135.38	82.677	100.42	89.612	141.95	210.74	115.05	200.85	110.95	175.81	92.967	139.4
167.46	84.233	111.62	81.136	107.02	87.927	89.344	89.929	78.793	87.147	104.42	121.14	107.75	111.28	114.61	119.51	94.655	121.33
205.43	131.73	161.16	102.3	148.25	118.52	153.26	123.85	121.74	117.26	148.7	187.82	140.6	166.75	130.81	168.24	108.63	161.86
137.84	139.92	128.74	131.12	108.98	123.58	112.91	133.72	122.77	124.11	134.66	141.5	125.56	165.77	130.81	112.24	132.35	133.36
144.28	140.6	123.15	100.58	127.27	112.62	120.21	103.44	109.68	102.35	149.04	130.09	148.3	134.14	136.02	125.54	116.88	133.36
178.18	112.76	124.92	88.563	99.352	94.031	122.2	72.188	106.04	73.176	171.72	186.15	114.4	175.68	94.429	178.75	87.86	145.32
164.09	106.64	117.11	87.087	99.352	103.45	101.8	91.659	76.043	88.498	114.74	156.36	106.32	147.02	99.459	130.71	87.86	101.98
235.68	137.69	175.53	125.91	178.05	113.4	160.6	129.5	137.9	131.15	135.43	198.36	116.07	172.62	99.459	164.62	98.896	138.63
225.54	91.238	118.45	103.08	87.912	117.97	75.197	159.35	74.162	145.26	96.405	161.61	101.88	136.71	108.98	124.88	114.16	96.029
163.14	152.56	194.09	142	187.61	107.43	157.4	119.15	138.43	110.53	140.14	256.25	116.24	199.87	105.99	172.91	94.357	150.22
155.24	132.17	160.91	106.93	136.35	111.65	103.2	121.62	111.36	106.48	131.32	169.64	110.61	164.88	107.11	143.35	102.21	139.74
239.52	203.59	190.21	180.99	169.83	172.65	192.84	186.45	196.52	184.58	219.51	213.56	168.4	240.44	148.5	227.75	141.38	209.58
248.9	109.88	117.68	143.09	114.63	139.08	106.02	132.33	121.04	162.36	112.13	118.16	104.62	108.54	104.32	130.41	115.62	119.67
216.24	141.79	164.86	115	160.04	116.82	153.38	114.85	140.89	122.19	159.02	176.21	139.31	168.23	118.48	166.02	109.4	157.42
232.58	159.11	144.22	157.56	130.76	150.95	163.2	144.54	145.83	133.27	187.21	165.71	159.69	149.37	159.91	149.28	145.2	143.38
195.05	109.46	143.52	99.849	146.52	92.289	134.56	100.08	113.82	103.77	134.79	179.39	111.11	161.27	109.27	168.04	101.37	130.79
141.43	70.501	83.436	76.508	62.409	66.616	66.138	82.02	55.936	101.47	90.149	97.351	72.578	104.07	72.658	100.32	67.787	71.285
196.4	106.89	119.34	81.519	132.24	81.286	144.65	110.02	97.48	90.325	121.52	125.57	123.71	117.93	113.86	117.98	104.66	121.82
178.57	148.13	160.94	90.347	141.04	100.87	129.74	113.65	120.22	87.595	178.61	161.15	150.27	192.72	144.24	191.62	103.63	172.1
133.41	126.98	156.45	100.19	137.3	109.04	130.87	124.1	128.3	158.78	125.99	149.58	101.72	167.36	118.49	147.29	113.39	128.49
170.3	126.98	136.84	93.734	117.47	113.94	124.27	182.2	128.3	127.8	132.59	193.78	113.1	167.36	118.49	147.83	113.39	128.49
136.58	179.24	178.47	143.2	158.09	155.5	169.73	184.63	147.05	185.23	177.18	218.11	158.45	229.8	170.22	206.91	150.08	188.21
199.59	163.19	169.51	139.35	176.25	144.49	169.41	125.55	154.73	132.09	165.67	203.89	158.18	192.82	158.47	163.94	139.13	150.97
152.49	75.579	69.789	85.201	59.877	85.332	66.26	93.269	77.583	119.82	76.116	95.02	79.697	99.978	80.227	91.892	77.245	74.487
139.29	68.971	95.153	117.45	96.485	117.51	84.68	109.72	85.174	103.88	80.714	103.66	72.99	88.45	83.862	90.684	77.121	82.766
171.6	96.679	92.555	124.76	69.979	124.28	99.475	132.96	110.75	130.97	78.714	103.66	92.795	88.993	92.131	91.035	95.763	77.78
125.07	169.75	164.31	127.31	171.18	117.18	151.39	111.63	155.91	114.92	177.47	217.38	147.87	233.06	134.05	223.6	120.86	175.56
28.994	33.044	40.97	20.811	51.779	34.478	28.679	37.75	23.694	16.947	27.889	42.983	35.754	32.526	81.037	28.728	35.821	30.574
49.872	46.482	56.926	40.861	49.296	42.705	48.862	35.994	43.086	29.853	43.743	37.095	48.662	38.676	58.602	42.633	50.935	51.69
55.428	51.988	53.894	44.785	52.564	51.518	55.133	36.301	56.383	29.94	44.075	51.458	49.023	46.54	45.791	53.462	45.217	56.942
46.119	60.91	56.827	62.91	50.789	57.71	53.701	53.851	64.359	32.959	58.911	41.881	65.957	48.272	53.495	55.694	50.098	67.185
99.677	123.67	119.77	97.914	99.758	97.504	108.19	93.423	119.97	69.115	85.796	88.027	120.93	123.89	113.97	102.21	112.68	118.14
51.415	57.736	67.402	62.239	53.32	63.467	73.753	105.57	56.59	62.512	55.976	46.382	52.429	51.39	58.024	49.734	51.572	57.422
55.187	60.386	67.402	67.298	53.931	58.335	59.543	50.753	59.686	51.456	60.671	39.118	57.456	45.613	65.112	55.912	58.261	69.527
72.222	62.946	53.327	54.06	59.93	59.754	61.18	50.753	61.6	49.019	72.269	41.054	66.91	50.384	70.309	52.898	72.759	67.344
75.024	77.178	70.207	62.35	71.642	62.443	68.874	76.741	75.215	54.176	72.115	73.501	70.513	76.124	77.015	79.679	74.294	75.102
158.33	101.65	94.37	96.055	84.004	89.732	95.379	76.741	103.02	78.157	102.12	92.886	92.832	95.601	108.78	94.496	96.922	107.1
142.95	80.631	87.582	98.578	86.132	98.444	95.379	90.751	91.991	101.36	83.277	92.886	72.206	78.237	80.817	85.581	69.025	80.001
119.53	96.035	79.226	131.25	93.354	124.81	91.648	126.62	110.12	128.39	106.83	88.542	96.732	93.198	124.01	99.698	95.682	87.676
86.595	137.98	145.95	125.09	143.21	122.38	136.1	122.41	145.66	112.79	119.54	140.79	118.5	147.22	121.07	144.16	122.73	122.42
132.88	128.68	92.752	113.69	113.83	122.84	125.4	100.77	118.03	115.4	137.46	95.187	129.46	108.95	148.04	111.33	116.97	129.03
134.29	117.91	141.22	117.76	118.68	109.06	137.16	104.36	127.24	112.99	129.25	170.05	107.99	145.79	147.16	135.71	94.488	114.14
177.12	142.74	142.31	119.07	144.73	130.51	138.23	192.77	135.75	115.99	135.02	147.85	137.11	150.45	141.16	136.55	132.8	150.21
126.17	126.49	95.307	168.97	98.13	162.24	108.81	188.8	136.29	197.63	141.05	112.32	149.47	173.45	167.69	110.02	166.24	135.73
137.32	144.38	146.08	138.39	143.18	136.85	147.56	148.11	155.04	131.95	128.81	148.26	117.95	177.68	108.05	131.39	95.194	134.84
101.63	117.89	119.2	124.89	112.33	121.3	116.43	143.08	119.29	122.87	101.82	149.58	108.55	149.42	99.487	136.7	93.119	100.05
115.98	160.44	127.01	152.84	134.57	143.22	159.98	143.08	167.22	148.28	164.64	170.27	143.79	156.05	140.98	159.6	145.72	140.25
217.85	162.36	191.04	152.84	213.14	148.07	209.96	142.68	171.61	161.4	164.64	194.14	143.79	184.75	137.83	162.52	138.1	143.28
138.94	96.344	93.124	96.962	113.56	94.564	114.89	101.89	104.2	107.63	84.623	104.49	90.339	106.15	86.956	79.871	78.29	88.834
158.77	157.29	158.87	143.09	180.16	144.68	168.07	161.11	161.05	170.09	145.4	146.81	145.99	147.74	146.74	159.97	157.29	148.28
131.47	89.544	116.7	119.32	101.91	114.93	91.601	161.8	92.469	145.11	102.09	192.95	113.06	171.66	113.22	135.59	111.33	93.76
149.11	160.64	139.97	129.77	149.52	150.48	156.27	145.44	150.41	162.97	161.22	148.47	168.86	165.73	178.34	184.99	185.13	149.22
122.52	117.58	129.97	111.81	123.78	119.2	103.09	129.22	113.45	140.56	140.78	128.09	130.21	144.91	116.87	149.43	118.03	130.7
146.49	133.42	118.46	147.35	122.1	152.59	124.11	164.91	129.05	153.98	133.07	120.03	132.27	128.71	134.72	123.87	124.52	141.67
161.93	330.01	292.73	276.25	300.13	277.41	278.99	295.36	278.8	262.28	318.64	315.15	313.33	328.26	297.08	328.1	267.65	314.43
157.77	115.26	128.26	128.74	134.72	123.38	126.84	134.7	115.84	133.06	121.66	127.98	110.31	137.42	118.47	160.51	100.75	131.42
184.15	131.56	122.46	97.267	135.5	97.998	123.64	115.9	114.16	104.31	121.66	137.48	110.31	145.26	118.47	136.41	123.66	127.43
136.92	128.56	142.97	96.341	140.44	107.63	129.35	101.66	101.31	115.53	130.21	152.89	125.19	161.12	116.02	164.47	107.39	144.6
247.46	102.62	113.09	96.419	116.64	92.504	114.69	94.173	105.84	88.583	127.88	152.46	111.2	149.71	105.62	125.82	81.511	123.97
110.86	105.97	110.18	125.39	128.02	114.61	111.23	111.38	115.83	112.74	113.61	124.41	111.2	111.63	122.36	98.516	83.262	115.33
149.12	84.105	140.81	92.237	133.1	82.87	110.7	98.408	88.474	107.97	105.4	149.33	72.89	131.44	89.363	131.3	72.677	115.28
92.043	97.185	121.26	98.755	110.15	100.33	107.36	98.97	92.95	116.95	81.965	124.04	73.55	145.07	103.82	114.35	77.037	94.968
191.11	124.12	152.09	119.52	135.43	115.55	128.5	123.41	120.97	115.39	107.78	162.3	102.27	138.56	126.47	122.05	90.709	119.44
89.943	123.41	91.29	120.45	104.84	122.06	110.17	124.71	120.28	122.67	109.27	86.04	99.18	86.747	126.47	98.435	90.709	113.14
131.62	60.384	121.18	79.086	87.747	66.127	58.209	89.719	56.174	101.29	78.587	168.74	57.86	162.27	64.244	141.02	56.684	83.513
210.1	175.62	190.9	158.19	180.05	161.65	181.29	157.02	168.68	159.22	152.82	192.51	157.57	187.71	178.42	172.74	134.75	151.7
184.67	182.16	189.1	179.09	175.27	160.4	173.34	138.51	158.48	154.14	191.05	213.3	163.82	213.89	163.83	204.93	148.18	182.07
134.15	165.35	118.82	159.57	121.66	147.02	157.75	138.51	158.48	154.43	148.62	140	150.28	144.83	149.66	150.24	148.18	144.62
104.32	90.113	91.149	80.297	79.001	85.751	90.479	86.604	77.41	90.945	100.1	118.9	95.842	102.22	102.43	90.489	96.319	93.291
84.357	103.82	97.475	80.297	83.721	85.223	96.363	80.726	87.007	72.822	92.452	109.1	71.095	108.08	101.4	112.49	86.661	110.15
133.6	104.09	111.25	70.207	109.68	71.965	109.31	62.292	87.007	40.758	92.452	102.09	74.797	90.658	89.132	99.469	78.273	122.57
133.6	116.93	112.96	98.295	110.81	114.92	116.07	120.62	121.55	101.25	110.94	121.73	103.18	108.77	106.38	110.5	96.038	125.56
103.49	101.92	108.42	124.84	120.02	150.91	120.19	128.09	125.4	138.9	102.66	88.005	92.078	101.7	95.553	106.24	102.94	99.014
114.16	134.35	186.83	138.16	150.91	135.37	140.38	120.46	140.77	152.73	126.31	210.32	113.63	203.96	118.69	194.23	109.51	164.89
108.73	134.35	153.07	132.2	144.26	123.85	140.38	109.8	140.77	109.39	132.1	198.58	105.79	202.09	110.09	186.99	109.51	160.11
57.216	71.641	104.37	63.793	105.92	80.38	86.484	113.51	88.763	81.878	79.93	142.63	61.551	111.22	55.104	105.65	70.116	79.411
157.7	222.15	174.2	167.44	195.75	187.94	196.4	162.74	194.52	166.51	214.06	189.92	226.49	187.88	264.03	195.26	215.28	199
165.38	205.09	194.66	156.54	202.1	149.49	189.27	154.57	181.82	163.08	195.45	234.5	192.4	240.64	185.43	257.05	171.99	240.62
81.96	53.014	80.834	44.517	89.439	52.442	73.736	67.389	57.591	76.345	60.026	90.262	50.837	81.028	54.514	65.403	51.955	54.814
93.539	68.831	68.806	113.04	71.35	111.38	68.98	133.31	92.43	117.38	83.741	100.67	92.319	81.028	87.191	57.178	91.943	59.35
190.78	174.44	192.89	127.93	210.61	142.71	188.71	125.15	164.34	123.66	176.92	212.22	164.71	194.82	154.65	186.26	141.58	165.49
127.99	118.9	127.38	115.54	124.37	115.21	120.49	105.12	113.63	123.66	154.62	172.81	134.72	167.8	108.04	177.65	90.274	133.03
105.6	139.51	141.21	150.94	163.9	155.18	143.46	165.8	145.34	185.6	119.02	130.17	129.86	108.7	155.1	105.59	160.33	112.1
129.36	65.321	83.148	69.824	85.534	65.096	66.112	68.176	55.539	82.881	81.464	110.71	65.133	101.09	65.477	77.654	62.342	57.751
156.16	96.687	82.513	94.9	95.861	90.954	97.039	92.041	87.489	82.42	104.42	96.663	110	103.48	104.26	81.532	95.663	94.436
167.62	96.664	104.05	92.088	92.102	77.133	92.306	90.748	88.082	86.591	105.16	124.09	105.67	112.86	103.03	106.98	94.023	92.994
181.38	144.93	189.74	110.96	188.44	102.61	192.87	103.11	165.88	111.06	146.39	250.73	108.79	204.24	99.815	175.29	94.023	154.54
147.04	117.99	116.71	107.46	122.29	126.95	107.25	125.49	112.4	126.02	122.42	149.9	112.21	147.83	155.12	143.09	126.35	118.19
124.31	76.595	81.183	101.66	73.998	109.35	69.564	149.01	85.958	152.11	63.271	104.78	71.571	70.687	81.256	57.592	99.115	63.948
124.31	73.756	83.892	80.571	103.88	92.999	87.224	89.268	77.865	105.01	87.953	104.76	82.937	84.964	91.106	82.486	82.847	63.512
95.252	71.631	70.802	77.366	80.508	83.194	70.081	110.2	87.011	102.29	55.838	80.083	71.126	65.118	70.909	57.331	68.8	48.822
212.31	94.992	153.82	77.366	120.89	81.486	114.96	84.323	95.585	98.328	97.05	152.02	93.985	115.82	102.79	107.71	111.31	85.705
179.74	103.13	147.37	123.38	126.64	94.057	107.1	92.237	97.424	97.369	108.57	168.24	105.53	129.31	92.207	104.36	83.392	106.19
124.17	66.262	67.898	89.652	66.574	85.761	63.513	85.374	64.614	92.704	84.115	84.308	88.409	76.242	86.988	68.881	83.392	75.696
137.16	88.701	105.8	90.893	97.717	76.998	93.568	74.295	91.829	80.778	82.72	143.72	75.696	114.09	76.061	100.45	70.259	86.754
156.15	116.03	105.8	90.893	113.79	83.01	117.41	69.515	114.17	71.571	130.63	105.91	112.67	119.8	105.25	130	92.792	124.99
169.92	135.7	165.1	115.78	161.08	135.39	169.27	116.28	141.08	110.31	123.75	180.68	115.17	160.89	102.4	142.05	100.16	131.91
122.49	92.645	130.24	89.274	119.62	89.901	103.58	109.88	93.188	100.73	87.166	125.29	83.128	127.6	89.816	102.31	96.645	87.12
120.18	103.99	133.99	74.366	95.54	74.361	97.627	50.93	81.489	36.11	108.66	175.41	91.954	172.16	87.972	145.36	69.748	101.18
137.48	105.22	154.08	59.515	109.62	57.217	97.217	58.297	80.105	57.505	103.75	174.29	101.89	144.69	99.486	128.07	83.008	111.06
213.51	176.32	222.8	164.73	193.84	131.37	157.29	105.28	159.39	106.11	216.84	205.55	187.07	202.5	167.91	197.3	138.59	195.13
68.208	91.94	103.7	90.26	78.164	86.412	80.528	96.968	80.555	85.603	99.048	106.52	97.654	105.25	79.875	95.367	95.132	98.343
79.191	82.013	92.524	98.473	92.407	114.87	87.059	132.77	97.135	149.89	89.031	91.342	97.654	74.038	112.51	78.649	150.26	97.455
227.7	141.3	171.93	110.82	156.52	102.94	151.96	108.78	123.46	123.44	140.41	202.15	130.78	202.18	114.1	182.17	114.03	137.58
221.93	129.49	161.7	103.22	159.53	107.85	129.59	156.18	122.52	115.48	152.09	195.04	129.76	200.49	124.96	185.84	156.6	148.14
169.21	160.37	149.05	166.8	152.38	147.33	135.3	133.19	151.74	136.04	164.81	159.41	177.11	168.89	169.24	163.04	135.14	150.43
169.04	72.477	95.492	79.368	93.577	64.351	103.99	97.184	84.645	58.931	83.964	138.02	71	86.676	68.1	94.419	72.844	84.51
143.43	83.428	108.75	71.323	93.577	73.715	99.041	82.883	85.836	90.987	90.092	153.44	86.412	113.38	95.399	94.543	86.814	87.406
99.724	84.529	69.25	101.41	72.894	111.44	76.81	143.01	86.893	164.03	70.198	61.926	81.465	57.304	110.63	68.949	112.17	75.928
99.724	66.098	73.511	83.502	68.257	86.06	70.439	98.062	81.359	108.22	62.048	69.218	69.515	59.544	73.226	59.783	92.701	58.273
156.82	146.11	112.29	139.85	130.05	150.17	117.6	171.43	118.1	168.01	132.23	116.21	161.11	125.26	175.32	129.59	183	123.98
164.8	109.92	146.15	62.441	111.69	62.044	95.521	55.504	84.08	72.017	109.94	163.77	96.838	168.88	81.473	147.55	81.762	123.98
85.494	77.408	76.354	93.052	64.27	95.888	99.028	84.197	86.088	95.672	88.944	98.1	88.351	117.71	81.498	91.225	84.935	79.927
124.97	110.66	119.61	124.51	110.06	128.07	118.17	121.11	106.8	127.39	101.22	113.77	110.06	99.164	110.11	91.242	115.83	106.8
151.89	151.44	167.47	119.85	142.57	134	150.48	115.8	150.58	106.9	147.75	182.15	140.34	170.49	145.66	155.56	108.63	157.16
205.21	193.17	167.47	194.04	192.05	176.54	199.88	175.14	210.86	173.07	186.7	191.86	182.03	173.75	188.89	155.98	158.17	178.06
205.21	119.11	149.95	99.116	139.43	94.73	134.73	134.25	128.73	93.79	119.21	185.25	112.8	152.05	128.89	145.89	113.11	130.2
215.99	99.239	127.53	77.66	100.91	80.308	87.033	91.884	79.219	114.77	109.3	167.13	109.05	137.97	98.387	112.39	90.503	101.13
137.31	99.345	121.65	84.62	94.521	93.564	83.266	96.86	78.126	114.77	108.62	141.84	112.09	118.67	114.72	112.39	107.56	101.13
94.994	80.666	74.777	93.855	102.74	99.443	94.086	109.4	89.131	97.598	103.9	101.39	106.85	90.239	107.94	96.969	118.06	92.368
91.624	128.78	103.97	137.62	129.09	116.4	126.63	129.44	120.63	143.65	135.27	123.74	117.27	165.71	113.61	148.01	118.06	132.03
114	106.6	102.09	69.873	105.7	90.127	98.005	94.847	89.381	105.63	111.91	115.63	119.52	114.16	119.55	120.62	121.48	98.688
86.311	104.62	104.74	103.05	95.53	87.521	105.79	80.365	103.27	63.834	108.03	89.522	99.761	91.364	81.323	98.487	85.285	110.74
95.212	148.02	140.94	170.98	143.35	162.55	161.16	153.42	164.9	135.92	120.71	173.23	123.7	152.1	124.79	151.38	136.43	132.61
122.93	129.65	122.98	126.58	152.18	142.36	122.13	137.43	132.98	151.37	132.05	144.24	140.56	141.46	129.86	149.37	114.73	124.86
174.04	85.834	95.02	83.942	101.78	84.521	89.708	84.063	90.327	91.824	119.19	113.48	108.94	105.9	118.81	104.88	106.56	107.72
101.73	65.398	52.506	92.339	61.392	93.029	81.291	106.8	80.915	115.98	65.28	59.044	71.241	79.078	77.575	86.054	91.435	68.632
98.528	58.751	66.267	100.35	77.984	81.521	83.53	96.663	83.282	106.2	55.379	71.463	58.2	58.258	93.029	61.45	73.798	55.729
127.34	77.892	104.85	110.1	112.08	81.521	96.207	96.663	92.246	91.473	86.948	118.44	66.365	97.1	76.14	94.209	68.018	79.874
140.42	158.27	129.2	168.64	153.68	174.92	182.83	148.37	189.08	159.48	155.97	141.44	151.65	137.16	131.9	139.56	120.78	157.84
217.68	269.03	239.64	220.78	250.2	217.69	256.97	211.95	267.93	204.61	247.69	232.78	241.74	235.58	223.58	257.55	219.99	274.38
132.91	213.16	184.2	176.68	190.91	182.1	188.08	160.95	191.41	164.92	194.47	219.88	209.5	206.49	215.68	188.22	189.61	187.05
156.14	146.69	144.23	147.43	160.63	146.98	160.62	134.88	161.33	134.08	128.62	149.39	119.96	156.35	130.29	158.32	143.89	138.61
150.63	164.68	165.89	164.08	187.56	161.59	184.24	164.12	178.06	149.61	183.72	162.43	163.88	173.52	151.36	186.09	138.94	157.28
171.92	143.17	165.12	130.2	142.57	113.27	142.5	121.25	118.58	124.33	171.21	187.79	147.17	192.13	141.28	186.09	122.47	157.28
203.48	147.59	162.97	120.32	161.98	128.27	142.5	131.08	133.38	159.91	139.42	156.24	138.74	146.24	146.69	146.49	142.64	141.2
115.86	98.979	108.04	99.852	101.49	107.24	93.899	115.27	94.002	102.39	86.619	144.6	107.41	133.44	87.869	134.87	80.689	100.69
100.95	79.51	80.243	95.095	81.811	88.053	86.498	89.407	102.82	83.532	83.497	102.25	67.609	83.44	66.867	96.187	74	100.69
158.5	79.881	96.249	101.48	84.635	88.053	101.02	89.555	93.009	89.474	79.517	109.72	69.692	79.043	74.975	74.926	82.244	76.535
148.48	84.182	96.249	81.391	87.959	90.445	94.867	95.246	77.534	114.98	93.946	107.15	94.684	94.58	84.432	88.526	81.173	85.235
95.698	114.15	109.6	107.49	98.191	102.65	105.45	127.18	118.54	125.77	125.14	107.15	123.87	98.661	107.66	115.24	106.1	118.4
177.13	149.6	181.43	118.31	160.67	123.34	165.58	117.63	129.18	117.09	161.24	192.02	145.37	222.87	144.28	188.16	116.11	172.93
177.13	214.9	181.43	156.33	160.67	164.88	197.5	122.24	203.64	117.09	246.21	192.02	213.65	222.87	205.55	215.56	126.93	230.2
208.12	126.44	147.47	109.36	141.58	98.845	137.99	99.381	113.5	96.916	123.57	181.44	113.69	178.08	117.69	147.79	102.91	130
190.84	126.44	121.94	123.24	141.58	130.59	166.01	125	139.44	125.8	123.79	150.49	113.69	161.74	101.94	173.54	108.11	130
149.63	165.4	142.29	152.21	143.88	148.64	157.87	140.31	156.95	140.44	175.93	125.09	199.54	136.27	190.5	157.75	182.47	166.63
181.55	115.41	149.69	121.48	144.54	107.31	135.94	103.72	121.62	102.06	130.04	189.49	120.71	176.74	119.47	167.28	113.68	138.95
194.67	139.38	154.85	102.48	156.83	116.44	130.17	105.54	131.02	115.32	136.54	147.17	154.01	153.75	163.97	141.91	167.33	129.33
188.6	89.35	80.721	84.408	74.616	85.91	81.036	121.02	83.474	102.35	102.63	81.714	96.783	83.267	97.198	87.136	106.25	87.356
125.66	158.89	121.27	148.66	156.86	163.67	139.04	157.69	144.25	159.71	150.69	130.72	163.76	147.23	145.78	152.39	128.2	156.77
125.66	129.96	190.15	96.07	177.58	99.489	165.22	86.099	133.26	86.811	136.21	179.16	117.26	173.31	97.407	159.96	100.64	140.27
56.146	65.782	121.54	66.139	81.467	54.917	72.482	59.095	67.747	63.485	70.469	81.926	62.447	84.627	63.558	84.647	61.062	67.262
73.276	128.13	111.41	103.99	87.806	112.64	105.03	111.47	112	118.01	96.354	132.1	110.8	110.29	119.16	103.37	118.11	101.72
182.87	100.62	111.41	89.487	87.806	82.016	101.73	94.046	83.192	90.827	100.06	141.17	84.67	147.62	84.379	123.38	76.124	114.57
91.96	101.29	149.36	87.792	139.1	83.933	121.29	82.971	101.72	80.36	100.06	169.72	79.194	147.62	67.077	123.38	61.336	114.57
115.41	78.385	87.795	74.614	95.454	66.196	94.377	71.184	74.671	75.152	71.894	144.41	64.99	90.624	68.773	85.337	61.017	74.587
90.672	68.267	87.795	53.722	68.203	60.875	69.872	84.531	67.23	48.259	58.499	107.33	55.848	90.624	79.914	74.728	71.809	60.677
68.281	52.316	70.051	28.351	56.607	33.472	42.379	42.492	41.446	31.528	62.019	87.921	57.407	93.847	51.146	81.464	47.675	65.058
62.185	26.4	33.802	21.696	26.589	25.756	25.546	23.176	23.562	22.903	31.572	55.762	26.837	50.608	25.328	46.39	27.043	30.526
36.718	36.084	39.905	23.533	26.264	26.976	27.737	21.121	32.073	24.104	49.183	62.856	44.772	61.827	46.98	62.033	42.558	47.985
38.147	21.678	25.723	16.94	22.139	15.789	17.619	13.263	15.951	11.171	35.339	28.094	27.26	33.168	23.083	37.21	17.164	34.135
54.686	14.524	22.334	13.644	24.583	12.168	17.758	19.415	16.524	7.3988	19.728	22.014	16.869	16.758	16.768	21.169	10.079	19.507
32.152	25.561	22.301	23.098	26.769	26.345	24.408	21.35	27.865	20.911	30.179	16.922	29.615	29.841	19.853	27.064	18.371	25.438
57.883	26.991	42.648	18.373	29.29	26.272	28.232	20.869	27.842	16.21	33.033	47.577	28.568	31.456	50.971	32.184	22.998	33.305
52.421	22.706	18.398	19.318	20.205	22.751	19.673	21.702	21.645	17.129	20.838	16.413	28.567	17.826	26.154	18.235	26.028	20.499
34.09	12.905	13.531	13.226	15.132	12.436	11.635	10.544	14.804	9.1418	19.357	11.116	18.416	17.909	20.019	20.04	17.398	19.668
18.388	12.294	13.531	10.783	13.187	9.906	11.939	7.5733	14.795	7.1792	14.663	10.134	12.381	16.864	11.865	12.656	9.9212	15.503
20.299	14.356	15.947	10.804	20.768	10.818	21.657	16.871	16.475	10.841	11.654	13.237	15.382	14.381	13.657	13.809	17.481	17.687
30.379	28.344	23.944	23.196	27.144	29.62	24.506	22.492	30.58	18.356	35.718	16.437	33.075	22.965	31.408	30.43	34.008	32.265
27.336	39.56	31.923	38.095	46.861	37.965	35.446	33.18	36.546	27.284	40.413	26.459	43.174	31.216	42.181	37.527	36.9	31.546
32.876	27.355	27.855	19.727	28.316	19.26	22.064	13.967	27.087	15.177	37.207	23.557	23.709	35.188	18.927	45.398	19.864	38.68
23.259	9.9208	6.8877	8.8834	7.7879	10.243	9.6913	10.081	10.737	10.477	10.941	6.9368	11.799	8.7349	11.83	9.7931	11.159	14.336
20.562	11.387	9.8807	9.7929	10.353	13.122	10.948	12.813	12.03	9.0065	8.151	7.4902	11.799	8.3957	12.551	9.9323	9.6117	14.068
24.711	8.0679	7.4925	8.9804	7.4963	9.3824	12.635	8.0635	9.8739	7.6537	8.2736	6.6731	8.8882	5.267	10.017	7.3186	12.409	8.9634
28.082	22.101	29.765	19.927	21.139	19.749	24.143	12.353	27.008	15.442	25.453	19.092	20.721	30.257	17.921	23.608	17.625	24.296
32.448	19.079	15.53	12.379	14.369	14.831	15.563	11.128	19.531	9.5821	27.621	10.38	20.721	23.439	17.921	30.562	13.181	25.297
33.417	11.897	11.318	10.705	11.016	12.525	12.022	11.555	16.28	9.5942	11.443	10.727	13.324	13.58	12.17	14.884	10.398	16.303
25.671	9.1915	14.163	8.3921	11.568	8.8881	9.2506	7.1269	9.1788	5.7364	11.075	9.2804	10.841	8.3066	10.795	9.5205	8.8133	12.972
16.677	8.3611	10.709	7.2774	9.2892	8.7306	11.543	8.6151	9.9698	7.2436	11.075	6.5952	10.956	7.4354	10.308	7.9362	9.7712	11.221
11.865	8.4931	9.1175	7.2774	8.1283	7.9975	10.292	8.2702	11.845	7.1277	9.2647	6.3384	9.519	7.7792	9.628	7.4407	11.064	7.5347
29.275	21	18.062	16.933	20.287	20.09	18.943	17.022	21.451	15.643	20.006	14.232	20.116	15.979	21.402	16.409	23.228	22.541
24.849	12.864	11.367	11.809	19.063	12.562	14.089	9.5707	12.764	9.7654	15.942	9.6328	17.219	11.759	19.554	11.95	16.255	14.857
49.43	42.299	30.908	27.519	29.928	32	32.456	26.725	33.198	22.901	51.708	27.555	51.673	38.862	44.096	49.93	36.524	49.504
24.503	31.661	27.921	22.526	27.669	26.264	28.637	22.753	27.388	22.176	38.618	18.576	40.774	26.434	37.441	31.781	34.273	34.004
24.503	33.246	28.791	26.78	29.067	29.41	29.932	23.818	36.006	24.938	46.673	19.947	40.774	27.068	38.398	27.755	33.09	35.371
32.335	20.163	25.243	20.031	26.163	20.071	26.454	14.41	25.288	12.493	25.512	18.44	23.893	16.96	26.17	25.902	17.319	22.831
25.851	11.993	12.345	11.4	11.799	12.436	15.088	11.108	15.211	11.023	12.234	7.6948	14.918	10.363	15.483	11.576	14.433	12.164
26.542	14.21	22.493	17.86	22.457	12.99	15.088	15.331	16.836	11.723	20.034	20.903	13.204	14.152	15.963	12.901	16.309	13.753
32.829	14.733	14.738	15.777	13.839	13.487	14.245	13.49	16.836	10.863	19.234	11.252	15.155	11.583	16.104	13.949	17.061	17.159
32.829	18.178	14.83	14.154	17.716	17.772	18.387	15.682	18.7	12.218	20.833	11.736	21.238	15.292	16.431	17.147	16.486	20.156
28.987	12.975	11.07	13.981	17.248	12.1	13.233	12.603	11.612	9.4223	18.395	9.7087	17.371	11.581	15.101	11.547	14.721	16.214
24.748	18.716	18.277	16.932	23.562	17.12	23.159	16.091	24.517	14.016	20.397	12.015	21.894	12.642	19.132	12.499	20.278	22.264
34.009	15.354	15.436	13.343	16.137	14.013	16.391	12.139	17.82	10.901	16.589	10.291	15.962	12.642	16.286	12.499	17.241	18.214
24.999	18.969	20.454	15.393	22.573	15.158	20.571	16.038	20.975	13.554	20.017	14.588	21.247	13.906	23.549	19.827	25.038	18.773
16.325	12.347	12.79	11.13	14.504	10.812	11.174	10.215	13.965	11.035	17.244	11.901	17.425	11.234	18.892	10.714	20.765	18.22
25.987	25.086	21.747	19.041	32.544	21.862	22.949	20.678	21.212	14.695	24.285	13.496	28.478	21.525	28.06	23.19	20.737	27.761
28.189	11.94	11.848	11.868	17.685	13.537	16.368	10.021	17.711	9.2021	13.103	12.273	17.609	12.537	14.662	12.333	12.415	15.982
28.189	11.888	11.695	11.025	11.594	13.708	12.854	11.608	12.525	9.4476	13.613	11.214	13.753	7.0868	12.985	10.507	14.809	14.166
26.263	25.774	21.246	20.334	22.66	24.484	23.283	17.906	26.61	16.851	27.842	13.422	32.622	17.044	31.553	18.197	34.005	28.423
30.904	38.066	30.323	34.045	37.614	42.798	40.199	39.099	36.7	25.918	27.828	21.425	40.599	33.324	34.485	28.72	29.011	30.565
32.876	25.882	29.236	19.736	32.579	22.924	26.989	21.806	28.934	20.966	20.605	20.696	25.831	25.431	37.544	27.23	32.053	23.541
32.876	44.508	46.577	33.334	51.16	42.562	48.719	36.915	49.669	35.833	35.053	29.116	45.541	47.294	40.965	35.476	45.089	39.914
29.04	36.672	31.671	31.601	35.422	35.407	35.602	33.817	42.835	31.247	30.868	18.785	35.535	25.661	38.756	27.067	45.26	33.255
69.641	65.573	56.727	52.455	59.335	64.736	66.767	56.483	60.454	50.608	68.394	37.176	72.814	47.166	88.588	56.704	61.263	68.678
69.641	73.005	65.963	52.455	60.59	56.969	64.604	60.057	60.454	60.592	65.92	49.555	74.894	63.502	80.201	64.032	72.291	69.613
46.549	41.633	37.173	55.803	40.326	48.691	45.826	51.077	62.138	53.539	44.879	32.432	41.57	32.267	40.659	33.91	44.455	36.478
46.043	49.814	48.884	55.803	43.378	48.289	49.842	47.682	63.663	47.879	54.967	42.661	53.772	54.333	48.231	58.483	47.848	54.33
107.42	94.36	83.096	100.07	75.917	103.1	80.259	99.736	87.308	99.493	87.991	102.17	94.788	98.812	126.61	93.156	120.65	92.69
176.15	141.54	140.68	135.45	163.25	133.09	166.27	124.39	151.39	120.6	129.14	147.29	123.41	142.63	121.17	138.74	116.79	133.3
143.78	117.69	145.42	87.373	147.98	85.99	128.53	82.27	111.09	74.683	123.61	141.28	107.79	142.42	96.068	147.24	84.775	126.11
41.064	81.194	79.294	85.609	94.496	83.219	87.603	96.279	90.379	75.253	72.281	84.014	72.091	93.041	82.806	87.828	89.038	79.799
121.58	146.44	128.56	112.73	118.01	141.7	106.8	183.69	109.49	122.05	169.19	180.26	167.15	187.38	162.41	160.75	153.23	146.23
173.56	131.41	156.2	122.61	161.59	127.72	143.7	162.53	138.01	128.73	110.43	147.79	116.39	102.37	126.48	103.59	135.05	103.14
150.25	81.136	82.915	74.157	83.667	87.534	92.904	96.026	83.207	88.161	93.519	94.028	96.174	86.052	84.255	84.947	73.489	89.343
171.05	170.04	174.31	117.9	178.34	129.26	168.14	115.23	146.1	105.79	165.29	167.08	176.98	184.53	172.13	176.59	171.91	175.13
134.98	64.478	55.828	89.244	62.554	97.948	60.11	110.67	75.08	117.82	70.827	63.737	65.771	78.974	73.901	69.748	81.877	75.721
141.12	81.181	85.292	97.014	89.466	90.035	87.344	131.32	87.781	138.25	81.276	111.13	95.66	87.259	114.26	75.1	101.58	79.663
141.12	131.38	104.48	145.84	119.97	149.06	136.57	146.11	142.75	137.95	129.15	89.33	133.19	76.768	124.99	100.6	111.84	128.13
120.93	75.079	66.261	89.139	65.108	80.117	68.867	78.106	80.626	89.442	78.556	73.057	79.696	71.337	80.969	81.227	71.589	71.439
68.206	73.493	85.069	81.047	77.344	87.184	82.967	77.448	74.071	69.201	78.556	78.303	76.463	77.01	84.959	64.568	88.194	78.094
62.875	63.92	60.574	60.878	61.595	56.37	66.159	63.326	65.196	51.039	58.186	52.104	69.104	52.868	61.859	56.729	58.533	77.693
90.176	61.919	74.847	56.914	75.08	47.541	66.87	43.701	51.259	43.531	72.571	94.401	63.99	103.47	71.179	95.981	66.553	66.314
100.59	143.97	115.59	145.88	100.14	140.69	151.67	122.31	147.42	127.96	129.03	91.962	127.85	82.947	148.41	104.4	106	129.47
123.07	93.884	99.265	96.886	85.271	88.747	85.872	80.367	85.415	87.865	125.8	89.952	100.04	92.284	83.529	104.4	85.031	111.11
167.82	103.04	101.94	120.96	98.906	106.08	110.22	125.07	94.467	141.32	113.49	113.24	84.388	127.44	83.529	128.08	101.2	111.96
143.65	68.32	55.379	68.491	65.888	77.693	66.895	75.372	75.028	89.867	82.029	53.375	84.47	74.033	75.401	78.049	77.204	82.199
157.05	144.06	139.41	140.66	139.56	122.89	125.3	125.87	128.35	128.09	129.88	161.26	147.03	139.97	150.86	134.6	131.52	126.91
225.89	126.01	126.43	137.1	133.12	133.42	160.53	134.77	142.12	141.42	118.13	111.32	126.67	113.1	121.78	111.53	121.22	119.02
120.06	66.547	61.439	105.21	80.369	81.5	89.007	110.56	95.736	138.39	63.496	75.828	69.327	84.194	68.798	80.407	80.91	68.291
51.46	93.127	109.73	110.85	121.55	95.173	110.49	137.52	115.7	191.18	79.763	99.911	83.667	87.745	110.86	84.074	105.02	81.357
113.64	90.737	88.771	81.387	119.91	93.065	110.49	85.159	109.58	152.17	68.647	93.18	71.289	79.594	74.734	73.912	68.696	74.171
247.87	161.54	172.47	124.82	177.57	129.35	178.72	113.3	143.12	169.63	163.38	151.79	151.27	129.62	128.59	137.43	128	158.16
206.33	103.63	143.09	121.65	124.9	125.71	105.96	132.65	97.996	126.49	106.63	150.41	91.801	107.67	98.125	103.91	106.54	113.06
198.74	103.63	107.03	73.536	130.18	76.779	104.41	68.112	97.649	102.33	113.84	86.908	91.801	114.67	80.043	124.47	88.576	113.63
172.62	135.07	129.33	158.39	130.18	145.95	144.49	161.97	156.14	176.12	132.94	131.67	147.51	119.34	166.69	126.62	155.36	132.8
152.18	117.99	129.33	83.826	121	86.995	102.95	88.255	95.9	144.12	132.94	131.67	126.84	119.34	116.5	126.62	103.33	123.96
83.263	66.168	68.12	83.826	62.364	79.676	59.003	80.825	59.87	103.07	67.349	73.433	68.619	96.538	62.777	80.531	65.42	69.692
124.69	89.344	73.396	87.386	78.2	84.491	80.099	86.615	78.203	128.35	90.642	73.433	80.934	82.545	76.507	92.109	77.073	94.564
135.6	67.713	81.52	71.498	75.243	75.108	67.042	86.032	62.545	93.611	76.73	113.78	77.596	104.02	78.142	101.53	71.732	75.87
129.34	67.713	87.669	60.828	75.243	66.295	55.773	75.442	47.709	68.075	76.73	113.48	77.596	87.199	78.142	90.155	80.287	75.87
97.405	86.315	93.315	73.148	94.288	78.156	91.454	85.977	83.139	107.38	81.8	108.36	79.874	116.22	73.399	102.32	90.174	84.112
147.12	261.98	204.49	228.62	196.28	238.54	212.26	243.4	222.34	245.82	246.18	210.13	266.95	248.31	258.81	244.35	247.28	220.25
186.15	166.28	205.22	136.59	200.6	147.3	174.71	168.57	155.67	132.34	145.75	185.98	149.77	203.48	155.12	176.36	152.01	157.98
193.25	162.29	106.48	193.45	120.8	208.89	139.79	205.01	168.73	226.08	164.66	104.69	200.03	127.49	201.33	150.3	204.71	156.26
149.03	99.192	93.978	89.924	113.44	93.629	100.83	90.328	92.227	110	86.916	94.329	75.472	112.9	81.609	109.11	90.536	97.025
126.99	72.64	81.277	78.575	75.507	81.304	71.562	84.838	78.834	104.79	63.449	78.706	73.121	65.836	71.586	66.317	70.393	60.386
181.19	119.2	102.36	150.06	118.31	132.65	124.36	200.95	149.88	131.13	97.441	109.27	111.36	116.34	101.7	104.41	99.414	96.158
123.76	131.19	115.05	132.98	127.28	132.65	132.75	119.74	145.97	114.49	117.35	117.91	112.94	101.02	101.7	105.78	93.115	120.89
149.93	193.31	157.71	184.13	151.98	198	179.77	212.87	181.64	188.35	185.49	176.51	206.58	153.73	215.3	166.22	220.24	166.1
117.57	113	126.54	120	105.41	118.47	106.14	125.41	116.12	146.57	100.06	130.66	113.6	117.13	112.8	108.67	123.78	99.499
102.67	103.16	117.28	61.15	116.97	76.704	97.081	65.159	77.011	66.831	96.694	123.02	92.004	114.61	76.378	106.63	74.727	104.64
122.61	136.56	135.42	147.13	146.4	105.06	141.78	108.17	142.24	106.86	141.74	145.7	121.9	131.96	111.19	138.6	111.96	131.5
102.08	91.828	93.667	73.744	84.061	60.941	92.19	65.548	84.848	48.631	94.768	77.166	84.85	87.951	74.7	95.607	71.13	94.361
50.904	55.942	63.184	59.333	57.849	55.596	56.763	75.235	56.397	57.107	47.042	71.465	49.335	54.48	50.551	48.334	49.346	58.293
50.944	50.309	65.989	59.333	52.09	55.092	46.523	65.34	56.397	54.55	61.153	47.169	50.642	45.147	60.046	51.876	50.221	49.045
60.027	38.071	58.341	47.368	61.174	37.192	52.887	51.865	40.329	40.667	41.147	64.767	39.662	45.209	50.156	52.207	47.382	43.27
70.018	78.329	83.385	65.331	91.234	70.473	95.381	79.266	70.926	84.029	93.469	90.294	69.596	99.235	68.939	100.05	62.207	90.375
143.66	66.689	98.895	75.419	88.115	61.93	78.983	84.452	88.986	93.426	74.411	112.89	60.243	104.58	57.729	101.18	62.667	76.847
136.56	90.237	77.558	116.19	83.038	110	91.301	120.39	102.99	138.14	78.824	97.615	89.772	64.361	97.855	60.931	104.2	61.438
139.61	102.85	111.01	130.34	108.95	111.9	122.76	127.6	125.05	131.48	116.85	142.39	111.68	128.42	101.27	121.06	105.3	119.96
101.76	106.93	107.93	94.304	106.39	102.37	103.37	89.307	125.05	85.905	116.85	104.3	111.68	120.95	101.27	119.74	101.06	119.5
177.85	133.88	119.92	151.95	142.25	167.39	150.66	159.76	189.51	185.04	123.67	109.99	142.28	125.03	144.78	125.61	155.98	121.5
169.65	113.94	85.193	120.09	92.267	119.39	107.97	97.775	121.34	105.5	118.52	100.13	97.615	113.19	98.959	115.71	86.272	123.42
95.272	87.012	84.287	95.488	82.798	87.401	83.236	83.32	90.891	97.55	75.925	119.6	82.298	115.04	82.851	107.5	75.697	81.066
89.562	83.429	84.287	97.391	90.231	83.443	90.135	84.581	95.238	89.866	75.612	81.714	81.955	78.94	79.361	83.192	74.323	80.738
143.84	74.096	70.164	77.497	73.883	79.891	78.571	135.66	80.267	101.01	79.068	54.981	72.299	76.621	86.101	76.232	93.321	77.088
126.92	107.08	104.69	98.181	105.14	115.04	126.86	205.46	119.74	102.71	87.667	96.283	90.188	83.813	87.076	76.086	94.774	102.8
132.01	108.47	92.002	106.37	86.371	98.311	93.79	81.118	97.687	76.439	109.51	113.44	113.63	132.29	104.19	112.23	85.989	107.76
121.88	127.42	121.12	122.34	137.11	127.89	134.66	128.11	130.05	121.94	161.65	127.94	142.07	146.78	141.79	160.16	126.1	146.61
174.69	136.64	135.26	128.27	151.29	113.88	137.23	136.24	130.19	157.26	144.69	165.31	145.76	184.55	136.83	187.49	142.02	156.65
220.4	222.84	181.2	202.26	216.45	196.94	194	236.49	206.12	215.08	217.25	221.82	210.3	231.06	199.3	250.82	189.64	212.68
132.28	116.13	116.17	113.49	124.75	121.15	110.63	154.36	122.1	144.87	126.09	148.39	134.3	142.15	130.8	140.35	144.58	110.5
48.556	71.401	68.287	113.88	83.056	112.35	81.678	137.12	97.083	140.29	49.484	62.661	83.353	64.032	83.697	52.621	101.18	52.166
129.77	68.795	93.669	81.99	93.586	70.417	89.187	72.317	85.179	158.2	47.289	75.407	53.811	73.007	63.494	67.381	45.918	52.166
106.89	59.155	82.862	80.305	86.806	73.437	74.834	126.42	73.541	106.67	36.739	66.349	42.859	55.649	44.546	42.572	52.718	44.817
94.841	73.714	82.862	80.305	86.806	77.395	74.834	82.457	73.541	85.074	75.431	96.134	73.314	97.087	67.808	93.838	71.194	79.208
213.46	206.4	190.65	150.01	191.01	170.2	182.86	205.87	177.13	146.4	176.53	198.39	201.38	179.41	185.75	176.9	165.34	196.8
117	71.275	96.278	53.52	92.65	62.521	72.434	58.194	64.046	60.145	72.456	93.026	72.944	90.116	76.826	91.003	72.089	79.524
151.37	85.814	116.24	77.544	102.32	83.377	100.39	72.637	95.109	96.2	74.061	145.84	74.459	137.61	63.92	123.98	58.834	92.865
217.55	121.61	143.04	71.941	162.64	79.797	131.38	79.421	108.28	94.365	138.15	150.91	128.72	164.26	117.49	163.68	100.96	129.99
167.06	187.85	158.75	189.34	180.42	191.71	177.19	214.3	191.89	216.66	183.78	165.64	219.49	167.41	210.72	162.53	218.06	170.08
176.49	162.71	158.75	164.16	136.9	163.36	137.84	217.97	146.87	216.66	161.88	190.79	168.87	167.41	177.93	162.53	185.07	154.02
95.328	76.107	78.578	106.39	68.944	120	85.803	132.19	106.44	137.97	65.967	100.95	66.318	93.534	71.602	87.554	82.086	73.102
71.771	58.953	52.47	79.825	65.044	83.018	67.332	88.989	70.338	101.68	67.309	66.142	75.464	80.942	73.885	65.345	70.631	60.267
135.92	86.994	76.298	82.024	74.225	82.462	81.664	99.883	73.339	98.6	89.127	83.532	95.309	77.712	93.154	76.697	96.848	78.244
163.41	114.22	100.62	98.412	119.19	113.02	110.23	120.42	101.91	131.79	123.48	93.032	130.98	105.68	133.28	113.25	124.04	112.27
204.97	158.71	149.96	142.07	146.68	143.33	142.97	154.18	144.36	182.92	183.5	159.93	181.04	179.32	211.25	179.56	165.6	157.36
150.44	220.97	205.84	193.47	188.67	183.84	204.19	196.37	209.41	165.76	232.59	221.09	212.1	221.04	184.14	231.47	170.44	225.56
144.78	140.16	129.71	143.22	171.34	140.81	166.89	142.46	167.31	131.89	136.88	140.48	147.86	120.15	133.57	132.64	130.43	154.9
143.47	104.03	97.99	122.36	100.96	122.38	110.78	139.41	112.55	145.72	109.58	109.79	97.007	99.985	113.28	120.96	119.26	95.906
97.68	99.998	78.819	104.99	92.308	109.12	96.838	111.11	101.79	124.13	109.5	80.702	110.79	79.138	109.75	90.934	116.25	100.52
144.89	104.94	115.94	97.71	88.879	101.61	79.725	105.87	88.493	114.85	108.83	132.6	112.96	125.55	101.8	122.95	100.53	112.61
139.52	101	92.473	97.71	88.879	101.61	89.772	107.1	88.493	116.91	108.83	119.29	105.52	125.55	101.73	117.59	85.482	112.61
111.96	222.74	178.86	189.38	165.78	188.84	182.19	202.68	183.9	189.7	201.17	189.26	216.88	187	212.46	191.66	204.99	194.12
118.55	108.85	94.629	88.172	109.2	78.293	96.853	122.28	100.22	81.678	111.87	133.56	99.579	120.04	88.282	124.88	90.624	118.32
62.751	74.785	74.372	88.172	78.344	77.167	63.922	122.28	70.418	84.483	67.809	114.22	71.801	90.312	72.196	88.755	81.747	75.903
135.64	121.74	148.17	151.42	144.95	160.87	113.94	189.1	111.42	153.77	120.91	194.28	154.71	173.13	183.25	142.74	197.12	115.56
126.64	195.66	216.95	165.03	233.1	161.33	199.48	214.01	195.41	160.54	184.48	236.83	188.25	222.92	186.57	217.12	177.14	185.52
77.646	66.522	67.468	54.63	78.311	57.581	71.472	77.789	71.504	55.322	65.94	52.23	61.841	55.075	62.505	60.449	66.491	75.172
98.497	108.55	118.31	92.834	107.9	87.798	110.14	111.97	102.69	88.816	95.372	122.94	101.8	116.98	106.58	100.44	108.77	105.94
139.25	119.81	143.21	142.6	107.17	139.56	135.51	124.52	122.68	102.58	133.43	119.81	102.16	102.26	131.62	105.25	108.97	144.88
234.11	134.84	165.29	135.81	143.92	137	137.93	124.52	135.63	131.71	156.6	161.88	145.39	157.7	119.93	149.62	128.04	157.76
170.81	145.11	116.78	135.81	118.1	128.48	126.76	143.09	122.51	159.56	155.25	146.48	124.93	158.33	103.64	152.09	128.04	134.12
127.04	145.69	116.78	115.47	118.1	138.63	126.76	138.01	122.51	154.3	152.55	147.42	170.21	151.74	173.54	151.52	177.35	134.12
123.53	76.279	72.134	92.549	64.984	85.288	102.55	89.067	75.321	109.21	81.834	94.117	80.179	125.03	82.304	93.556	89.765	73.639
120.46	85.398	76.851	126.08	81.613	122.37	111.45	109.76	96.599	115.24	81.834	79.487	80.726	96.373	83.895	90.876	89.765	81.076
148.13	97.875	94.946	132.48	107.02	112.84	120.54	103.46	123.15	104.03	109.95	77.152	93.694	93.139	83.054	96.112	98.483	93.467
137.28	134.18	130.7	91.541	129.24	111.98	139.68	93.833	135.57	99.138	112.66	155.39	107.3	139.86	98.926	126.89	98.483	115.42
142.19	132.23	135.82	124.92	118.72	117.17	139.68	118.63	123.84	122.69	136.66	149.69	119.97	139.86	91.821	126.43	90.124	123.82
106.85	80.358	71.109	121.08	78.651	106.23	85.764	151.88	96.856	128.85	65.094	77.771	79.903	62.356	91.008	55.799	90.357	67.491
125.01	104.27	109.57	118.22	136.53	128.28	123.61	170.74	124.07	143.74	88.187	137.23	107.61	76.043	112.18	80.314	112.57	99.845
222.57	178.7	182.76	135.7	185.93	130.46	175.12	133.22	167.72	137.95	194.83	214.4	157.21	236.07	141.09	256.07	139.17	189.74
187.38	141.08	138.69	132.27	135.25	129.49	134.89	141.84	135.15	137.41	133.19	155.55	128.33	165.82	121.27	151.07	132.16	140.24
200.37	131.28	108.36	139.53	114.47	140.12	114.79	184.45	129.15	170.27	146.06	118.9	158.92	114.99	190.64	125.68	175.74	108.75
118.88	88.383	79.234	97.604	80.27	120.96	97.419	134.51	95.292	146.48	102.83	98.695	98.028	99.072	96.643	97.02	110.07	86.298
113.08	88.383	78.969	106.49	68.032	118.01	97.419	134.51	95.292	156.27	102.83	80.62	94.318	66.48	93.246	63.618	104.19	72.686
122.97	54.614	64.125	70.92	75.928	70.164	60.282	110.49	60.417	94.623	67.728	86.898	49.423	64.127	43.243	69.268	43.639	57.829
107.02	103.35	108.1	113.45	130.08	102.86	135.58	88.783	119.82	101.84	85.222	96.258	74.829	101.41	74.491	99.143	74.573	91.791
110.67	67.798	79.728	83.229	79.788	75.004	77.103	72.628	72.397	80.894	73.977	116.6	66.488	99.909	74.491	99.143	66.22	66.063
110.67	67.798	79.728	76.044	65.17	73.395	53.375	82.794	61.649	88.65	43.771	97.257	55.073	62.905	63.627	51.646	59.105	44.526
208.61	150.06	181.88	147.02	190.36	147.4	160.81	119.2	154.72	134.49	135.39	186.32	134.63	165.75	136.34	157.01	128.16	146.16
70.407	70.883	98.355	65.502	92.445	61.17	77.06	59.088	68.103	62.789	68.889	111.54	55.711	104.4	59.906	91.347	56.003	81.987
117.15	75.868	123.96	97.484	108.07	85.647	100.35	50.782	86.265	62.789	69.901	155.83	78.229	136.26	88.593	113.22	50.677	85.075
92.618	156.95	118.88	136.28	122.98	127.44	137.03	103.98	150.68	99.741	167.18	160.08	153.48	188.52	138.22	191.2	113.03	167.34
199.25	214.8	190.67	178.94	201.92	175.53	223.31	167.42	200.34	166	243.62	208.05	212.29	215.68	195.37	246.25	160.77	223.55
172.6	120.21	178.51	108.58	189.78	109.11	164.29	118.17	160.13	94.742	122.92	186.85	97.72	155.86	92.688	156.79	91.146	151.77
137.94	106.78	127.61	109.56	140.09	101.34	137.4	75.209	133.78	81.963	122.92	151.75	90.006	155.07	66.008	152.97	61.598	143.94
141.92	124.47	119.93	78.848	145.8	82.518	121.89	72.072	104.6	82.121	105.66	109.72	115.43	120.23	107.54	113.15	77.948	120.06
105.71	109.15	58.424	101.5	83.982	103.9	96.685	102.43	104.6	104.39	102.68	80.389	111.82	90.899	104.86	94.555	77.948	94.944
164.74	109.15	93.63	114.67	86.211	124.72	97.686	135.16	116.35	158.39	104.65	93.703	128.7	94.235	137.81	109.37	155.04	141.81
123.86	87.002	77.244	91.49	89.964	93.369	97.686	91.047	106.81	110.2	101.72	93.703	94.431	94.988	92.205	96.146	102.46	108.44
181.01	123.62	136.82	129.57	158.89	112.69	145.02	130.67	142.21	106.69	110.27	155.36	103.27	118.43	106.85	112.97	103.47	115.77
262.54	158.31	177.15	144.87	174.51	120.75	166.39	130.67	148.46	115.84	150.88	232.3	130.35	198.79	121.59	185.49	116.01	174.38
167.97	158.31	123.96	144.87	125.62	161.23	134.63	174.6	156.43	198.57	150.88	127.39	155.22	118.63	145.93	127.93	173.43	149.31
220.28	206.92	183.2	185.59	190.38	157.54	189.64	182.19	179.84	205.83	217.3	196.65	196.1	174.47	172.98	182.83	160.58	199.59
210.41	147.4	164.86	118.29	179.15	128.04	167.47	112.91	157.09	99.486	122.33	162.07	131.66	152.17	129.15	139.65	125.21	135.08
201.5	212.08	192.52	131.37	190.6	155.13	182.05	141.46	165.99	145.35	206.95	202.66	200.57	198.02	184.24	213.41	168.23	207.27
131.51	122.37	106.89	126.32	100.12	124	114.47	141.46	114.24	137.87	146.41	164.8	121.29	154.84	123.04	151.05	149.89	126.01
123	120.44	96.647	136.59	100.12	140.96	112.88	166.14	127.44	182.14	121.48	122.73	119.8	110.68	123.04	98.126	149.89	95.978
128.14	101.59	96.647	116.91	104.61	124.96	121.69	146.05	98.148	120.55	121.48	140.98	108.65	145.11	95.969	143.31	86.222	121.26
183.28	114.69	132.89	133.07	141.92	124.96	128.02	146.05	118.03	120.55	142.66	222.99	108.65	164.57	95.969	148.39	86.023	121.94
175.71	98.349	120.77	102.46	125.14	92.219	104.91	97.014	101.64	108	98.631	123.3	94.154	122.22	87.507	118.01	86.144	102.84
180.71	132.03	167.19	112.33	165.35	113.5	163.89	107.44	139.08	106.49	140.66	187.7	111.93	202.18	99.143	191.16	88.938	143.48
133.68	86.681	116.62	97.861	121.51	98.749	108.08	117.91	92.934	134.61	90.528	134.23	109.76	114.1	116.9	96.976	118.7	85.425
164.67	172.68	145.82	135.14	142.26	146.34	129.73	157.4	146.22	171.72	189.01	169.43	185.85	185.43	185.69	189.88	180.73	184.78
110.72	127.92	124.88	119.58	112.42	108.62	113.36	118.04	114.99	97.59	134.06	135.16	104.99	113.64	81.604	121.43	68.964	127.84
91.799	73.143	102.86	71.347	107.31	64.814	97.878	80.571	86.1	66.184	82.374	139.12	67.384	113.64	62.437	99.129	48.622	79.613
125.94	74.937	80.964	98.84	93.105	75.166	94.003	96.876	91.491	113.72	77.813	87.364	69.035	94.103	71.38	80.717	73.156	78.206
141.05	107.48	119.67	121.25	121.04	115.75	111.75	162.31	100.84	141.85	95.618	115.59	105.42	89.665	114.77	84.201	102.06	87.3
95.128	77.069	70.188	139.28	84.846	123.09	83.357	145.77	101.59	156.14	65.799	78.477	75.103	74.258	98.192	72.828	105.68	57.51
117.91	76.723	72.636	93.247	102.56	78.447	91.207	66.839	101.59	60.998	55.843	66.116	73.521	61.756	75.389	59.501	61.632	59.395
125.68	96.162	110.64	136.58	124.48	119.81	98.649	123.97	109.58	142.54	85.473	82.646	96.644	61.95	96.617	74.634	93.637	70.471
125.68	123.86	143.86	134.36	151.86	148.19	145.04	124.38	129.17	129.2	111.95	135.86	105.03	136.28	96.617	118.27	93.637	108.85
132.26	89.629	93.735	108.63	109.1	94.32	102.79	99.119	97.958	102.13	87.477	116.58	93.824	87.818	89.687	78.637	94.896	87.042
223.04	93.839	93.735	104.3	109.1	83.867	96.302	88.396	101.44	92.218	89.147	125.19	96.614	94.218	84.62	83.627	71.719	81.326
234.71	257.93	231.28	209.68	267.24	206.99	247.54	196.71	224.19	198.6	274.81	296.08	252.09	287.4	237.33	299.25	192.2	267.09
258.84	168.46	176.54	126.99	198.35	124.69	163.95	114.99	147.48	125.94	165.03	216.39	155.38	191.62	151.49	179.31	134.25	162.03
122.66	178.91	152.11	150.61	142.12	148.23	154.25	148.13	170.33	163.91	170.23	171.61	177.52	166.19	166.09	167.89	160.14	158.51
82.774	55.542	71.941	84.126	70.287	80.435	75.831	93.402	81.389	114.81	46.06	69.668	47.429	38.726	55.752	47.142	58.726	49.844
61.899	101.5	124.33	110.04	91.282	89.021	95.462	89.257	123.59	94.32	71.483	124.45	57.7	91.411	80.748	84.343	76.555	89.232
72.531	66.969	91.107	76.791	82.54	69.023	79.984	83.177	79.521	81.429	59.268	106.43	55.789	85.349	48.889	79.46	65.174	63.607
73.183	94.358	105.5	108.84	91.679	99.597	94.539	106.49	108.32	114.36	71.012	112.27	84.783	87.38	86.396	78.326	96.141	78.781
108.04	127.34	126.93	106.21	132.43	119.65	113.34	164.36	123.06	165.61	99.089	149.88	114.85	101.36	121.01	93.908	129.03	104.64
179.77	95.218	99.905	87.692	92.771	89.96	86.376	141.64	92.279	117.97	128.72	121.95	95.179	103.65	98.919	104.88	113.76	110.32
182.75	145.33	121.01	116.22	128.54	127.38	129.49	108.23	112.09	103.05	160.11	141.29	150.29	165.66	142.77	177.87	127.43	145.95
186.52	117.35	152.12	121.63	184.38	100.33	163.63	86.793	123.61	99.259	117.36	177.79	102.45	145.2	86.057	124.47	87.026	104.65
139.99	90.685	94.798	80.248	97.491	75.233	96.92	85.289	83.593	72.817	95.298	143.15	79.534	129.18	72.557	118.06	79.499	104.65
163.71	81.009	94.798	104.63	97.491	115.13	111.61	107.64	94.704	112.34	82.742	102.12	73.552	96.956	73.123	100.62	77.847	80.405
181.2	131.06	123	96.495	140.17	104.02	140.45	98.952	133.42	102.65	163.23	159.33	135.4	156.13	128.76	154.88	119.42	154.56
227.84	147.77	142.36	145.89	160.67	129.69	147.34	145.9	156.27	132.83	163.23	182.93	135.4	194.28	133.58	199.06	128.11	154.56
129.46	112.49	86.705	145.89	90.469	123	142.05	131.72	132.76	132.83	120.16	93.091	117.55	113.58	121.98	120.66	127.14	137.22
93.354	87.178	86.705	86.602	90.469	90.731	93.476	100.24	103.59	122.8	98.021	105	99.236	113.58	89.436	113.23	92.258	89.283
129.41	90.705	101.59	102.81	112.17	90.731	100.64	93.48	113.47	102.83	77.484	72.265	86.203	104.99	89.436	75.792	80.96	76.362
151.75	134.93	166.03	125.16	161.32	125.69	148.03	128.39	145.34	135.98	119.71	198.43	119.57	170.41	106.02	153.35	116.59	127.63
100.07	74.463	93.913	101.8	100.36	104.79	99.141	121.53	103.6	156.04	82.262	109.55	96.127	71.336	95.123	70.678	108.07	86.608
108.38	142.66	152.28	136.16	145.59	134.95	123.54	172.17	111.4	200.13	90.771	165.65	123.22	126.82	153.06	104.94	172.82	94.808
102.47	111.01	136.81	83.31	121.6	85.154	111.19	75.456	109.73	77.206	83.067	181.61	77.126	128.83	83.229	104.94	70.739	92.553
194.61	110.39	129.94	96.178	154.55	99.321	134.63	94.363	121.7	73.045	121	118.91	109.6	124.58	97.698	122.46	78.782	127.68
107.62	104.27	103.7	97.259	98.754	96.212	103.72	143.09	107.9	91.496	115.74	114.25	111.31	120.47	107.4	118.96	105.56	115.49
163.15	182.15	190.8	153.71	182.54	173.77	183.45	135.36	168.04	139.57	217.03	197.9	184.98	235.02	161.41	214.9	142.93	201.72
163.25	182.15	190.8	155.66	182.54	173.77	183.45	135.36	168.61	139.57	217.03	224.41	184.98	239.53	161.41	230.02	142.93	201.72
187.28	108.67	110.55	125.09	114.69	139.89	115.62	171.65	119.98	182.33	103.47	125.04	118.09	129.69	119.32	120.93	145.32	114.94
139.22	141.97	153.75	133.13	161.93	139.89	163.3	162.05	152.6	163.51	135.13	161.44	118.09	155.39	119.32	144.62	145.32	130.37
140.36	164.09	169.64	127.88	168.31	143.64	166.59	148.81	153.55	148.27	175.71	179.27	169.6	181.87	169.33	196.68	135.28	183.73
175.41	164.09	141.4	134.35	149.14	143.64	150.86	142.89	151.3	143.53	181.09	132.19	181	181.87	164.49	189.7	135.28	172.71
152.29	86.088	113.08	108.62	124.77	107.38	112.52	106.7	111.68	121.41	85.609	123.39	91.733	121.75	100.07	115.96	100.2	87.639
122.57	173.54	129.94	152.88	155.17	168.49	144.16	168.42	149.42	197.41	175.45	155.12	196.75	153.75	210.89	156.74	206.79	166.24
85.455	60.973	99.448	75.167	87.938	69.083	68.238	89.6	54.691	99.124	63.606	111.59	62.808	91.313	74.481	75.712	74.302	54.095
95.032	123.03	117.76	119.23	123.33	121.22	113.19	144.49	122.12	127.1	139.94	140.52	113.6	152.75	98.335	146.23	91.17	136.58
60.214	91.695	75.837	97.155	90.049	94.504	85.407	100.28	84.986	91.035	76.767	93.366	80.891	97.563	84.023	83.03	82.469	87.745
122.82	67.212	69.251	68.635	87.101	79.955	90.251	77.72	78.14	85.697	61.232	80.131	77.759	86.493	76.173	63.996	72.574	68.729
262.36	182	198.86	133.72	196.43	140.29	202.17	131.37	171.4	146.86	174.36	182.3	179.67	169.94	183	163.46	161.23	176.92
203.07	162.36	146.65	133.72	190.18	140.29	182.59	126	171.4	145.11	156.91	144.14	162.9	131.38	151.91	143.78	152.12	154.61
128.18	75.516	106.85	66.562	98.929	44.106	76.774	35.75	69.006	36.79	92.816	140.48	82.231	125.64	74.15	124.81	61.986	85.208
111.67	113.72	117.12	88.923	134.4	75.656	117.13	66.538	114.88	71.272	91.716	141.06	73.283	130.68	59.608	125.13	48.177	115.7
206.56	124.24	124.4	111.18	136.78	110.57	124.64	130.43	128.97	121.3	126.7	153.27	112.43	137.34	96.454	129.93	93.066	132.21
224.39	229.5	217.24	219.05	226.11	216.39	231.17	181.44	236.78	185.64	198.04	238.61	204.33	223.25	190.87	229.09	191.6	215.16
156.12	142.08	170.77	149.6	178	141.71	168.69	170.92	166.57	119.43	125.4	182.35	120.2	145.97	124.2	137.39	117.27	137.42
74.786	80.539	81.204	94.909	87.485	85.213	79.436	97.164	70.439	126.25	93.473	89.816	95.969	85.805	110.23	88.283	116.58	70.184
100.31	114.08	137.8	95.661	149.14	111.12	122.38	117.93	110.12	127.49	102.79	158.14	116.16	133.96	118.38	116.78	122.66	109.22
83.828	48.943	53.502	67.368	51.867	62.884	52.521	96.121	50.074	100.56	44.128	71.819	69.859	50.46	80.45	41.497	81.455	37.821
133.05	66.347	80.596	88.991	78.007	72.673	77.708	126.44	69.711	81.891	55.585	102.94	63.608	81.69	63.83	59.065	62.037	66.492
169.45	75.938	92.894	70.984	92.86	62.32	78.1	63.079	66.639	76.339	78.953	114.68	69.876	87.086	70.233	75.996	64.041	70.072
122.27	46.458	72.545	69.201	73.151	58.669	62.262	52.862	56.415	53.716	48.738	64.894	35.21	56.315	39.765	58.562	32.495	52.328
149.85	89.72	104.62	78.086	92.929	72.086	90.633	57.846	86.459	60.825	112.97	134.6	103.96	119.41	92.762	116.75	87.308	108.18
124.26	137.75	162.22	100.68	139.2	114.78	155.22	85.346	136.49	85.811	124.02	176.43	127.13	140.4	110.72	135.58	96.317	138.06
63.069	77.182	64.763	83.476	67.857	75.897	76.849	71.598	81.113	72.922	61.28	50.858	66.323	45.707	72.58	56.666	75.156	76.069
66.745	69.598	90.355	92.241	93.282	52.973	72.735	58.084	76.48	59.593	65.372	93.045	55.128	86.369	51.832	86.857	51.142	68.341
89.346	105.45	118.71	145.14	131.1	130.5	108.58	106.83	129.88	114.22	65.977	101.97	89.709	57.456	122.48	92.901	77.446	84.095
115.68	192.84	168.36	155.93	186.5	144.78	190.96	148.58	187.33	142.23	184.67	192.83	180.61	194.84	169.38	205.86	162.24	185.54
112.32	81.94	105.6	97.624	101.9	94.031	140.35	120.11	114.24	99.78	90.749	98.731	68.876	118.36	67.041	119.32	82.714	93.985
146.43	67.672	64.399	112.08	72.478	110.15	87.689	131.33	103.92	138.47	80.842	77.506	68.876	61.293	90.825	53.267	83.711	62.858
167.41	123.12	134.87	101.89	136.57	95.796	121.43	88.749	119.53	89.105	114.66	156.01	124.92	138.36	109.07	128.84	100.87	124.37
54.949	120.1	80.239	164.43	95.871	139.43	102.07	157.18	122.41	145.26	110.29	93.992	109.75	98.833	110.31	99.557	112.4	103.35
65.38	113.14	90.524	115.62	107.62	116.14	111.29	115.83	128.48	121.76	99.902	85.587	109.75	95.098	99.988	91.657	93.1	104.89
142.42	113.14	111.5	123.12	144.65	116.14	146.94	115.83	134.75	121.76	100.55	165.95	113.51	179.75	118.72	96.39	117.42	107.16
165.08	91.49	129.84	80.772	108.33	89.849	86.579	103.33	78.347	116.15	120.49	185.46	110.74	165.82	98.884	146.96	91.092	108.02
81.539	135.23	126.33	111.87	154.03	102.59	155.18	161.97	138.83	116.06	125.37	81.201	114.64	93.771	98.931	111.18	98.802	127.68
72.85	62.862	50.594	74.801	55.448	77.286	59.991	111.44	61.81	99.728	62.206	55.388	66.572	53.138	78.714	52.046	80.925	54.427
113.8	60.444	66.079	56.107	59.804	50.161	63.901	52.349	53.848	57.627	64.008	72.142	55.863	73.702	46.511	78.865	45.871	66.581
73.231	82.55	91.795	90.122	113.84	81.753	100.02	79.859	98.473	81.374	80.723	108.8	77.202	99.36	71.019	104.05	73.052	88.856
217.95	171.17	184.52	139.34	187.49	142.06	185.06	139.5	182.58	145.29	170.98	227	147.62	176.88	127.86	193.39	119.26	159.94
258.04	221.95	230.05	174.1	213.32	177.17	205.42	160.3	192.77	168.74	223.52	261.82	219.77	254.83	204.91	245.27	186.63	223.49
125.84	123.81	98.449	136.14	127.98	157.9	138.39	144.56	144.96	152.11	112.99	87.951	130.26	101.48	153.13	99.431	144.19	121.45
118.78	97.593	97.468	104.84	104.52	98.716	125	87.449	127.53	89.586	115.44	144.76	109.37	145.82	96.243	134.41	96.821	121.45
143.47	127.47	118.5	104.46	135.14	128.23	189.3	122.2	143.05	139.75	96.373	130.91	102.3	125.38	94.929	107.32	95.182	99.726
170.87	229.89	220.37	240.88	224.35	211.15	216.81	201.96	231.11	193.81	208.8	239.66	192.72	225.99	190.94	226.65	180.38	221.11
109.61	87.599	95.677	159.38	94.374	116.12	89.462	99.897	115.96	104.69	121.95	108.03	78.017	107.16	65.942	102.86	65.304	99.855
90.304	73.328	85.962	82.46	90.563	79.544	73.359	85.552	73.873	91.277	83.526	101.2	78.017	98.511	65.942	89.374	77.893	84.416
122.6	75.943	86.969	63.129	98.859	62.06	69.748	68.62	67.886	77.575	72.824	113.74	71.062	95.178	79.462	89.558	65.666	69.576
116.57	98.126	115.01	104.4	126.34	94.522	117.11	95.253	114.75	102.18	94.379	130.59	79.307	114.71	102.03	116.67	63.575	105.3
97.422	67.764	66.232	79.508	65.349	81.136	67.255	95.253	65.241	110.39	65.844	60.618	65.394	47.575	69.981	55.409	87.126	57.576
118.11	67.764	66.232	81.743	64.987	87.271	69.068	79.384	93.683	80.238	68.881	60.618	77.455	58.375	82.739	55.4	87.233	67.043
126.46	102.07	92.488	104.03	96.526	94.821	98.966	98.317	109.66	95.277	99.292	108.04	89.359	104.36	82.739	102.16	86.403	111.35
148.35	114.99	163.02	144.62	151.78	145.56	123.36	187.85	125.02	160.68	120.14	179.88	118.74	160.49	109.11	157.66	113.88	114.43
171.82	114.99	157.57	103.76	151.78	102.94	123.36	123.2	120.68	103.59	113.23	165.31	91.164	160.49	79.099	157.66	70.371	112.61
88.975	43.074	59.271	77.529	46.848	82.441	47.594	92.472	58.051	106.81	47.274	84.397	44.662	59.025	47.483	59.262	48.487	45.656
84.973	91.375	92.798	115.25	98.973	111.53	104.08	120.21	109.52	131.98	85.604	105.72	72.69	81.619	82.065	81.632	90.408	90.797
142.73	89.919	134.56	102.47	99.172	86.695	93.31	83.554	92.546	76.47	87.432	180.97	68.579	134.64	74.013	115.73	74.09	92.994
170.63	227.57	223.33	185.22	225.19	195.21	214.06	174.02	199.31	200.46	208.05	211.03	212.36	212.18	205.61	216.99	203.66	218.2
242.1	160.2	197.34	162.65	208.33	170.45	178.67	122.65	180.75	134.17	165.35	198.39	142.29	179.62	141.22	169.33	134.51	167.16
201.5	182.88	184.51	201.77	199.9	196.61	194.31	159.25	214.94	163.35	179.46	175.57	175.74	177.49	167.02	180.91	157.64	174.89
143.53	184.52	150.23	181.99	172.16	203.65	194.31	167.58	180.46	126.03	200.37	150.39	174.75	177.49	151.12	182.56	126.24	196.56
230.27	256.32	293.74	207.84	281.4	218.44	269.86	196.34	243.51	173.51	246.51	254.98	271.5	255.6	260.04	266.14	233.52	265.93
230.27	160.81	195.47	113.94	143.96	131.7	129.81	177.07	110.43	146.65	174.79	210.17	184.91	163.12	185.13	161.67	174.86	157.96
125.44	77.661	90.246	87.42	87.68	85.025	75.506	102.43	82.825	89.917	86.606	102.18	84.602	81.034	97.287	71.505	100.9	73.741
114.98	115.68	122.11	90.337	129.67	94.766	112.41	91.712	97.895	97.116	135.68	111.59	121.16	139.5	119.85	146.21	121.46	122
106.95	84.849	68.577	72.345	88.773	87.13	105.07	90.183	76.863	89.467	62.93	70.262	92.28	49.688	112.1	56.461	107.71	57.967
62.818	56.774	58.874	73.501	67.115	70.526	64.962	106.19	56.174	88.545	45.327	70.262	49.047	50.673	54.726	44.707	60.685	54.638
64.316	85.933	65.64	107.74	111.62	96.108	91.715	106.24	99.136	99.905	69.57	71.534	74.965	88.256	67.324	87.665	60.293	89.959
91.956	100.51	111.8	72.862	125.09	74.874	111.89	81.847	89.065	82.42	92.52	109.85	90.169	168.9	93.576	106.22	95.162	83.15
112.88	41.528	50.335	54.234	50.026	52.106	49.357	55.741	48.692	64.58	55.809	67	40.34	51.807	43.526	44.127	50.755	44.647
58.87	39.305	41.045	25.201	44.79	27.276	35.921	29.72	34.502	31.484	47.527	56.204	42.177	46.079	40.797	47.335	37.354	47.864
96.447	41.882	60.608	25.479	54.262	21.754	56.654	18.099	32.187	17.544	48.11	74.814	32.174	58.307	31.985	58.339	31.053	49.547
131.79	37.105	49.024	37.991	32.193	29.253	30.503	23.563	28.87	23.776	48.11	54.49	36.571	44.114	27.095	46.922	31.053	43.399
74.73	43.467	59.588	29.308	51.28	27.557	41.099	24.673	33.563	19.901	62.42	66.851	48.585	65.78	39.727	62.547	39.365	48.079
53.822	36.707	43.021	28.594	31.871	31.684	37.582	25.703	29.893	25.067	56.001	72.548	50.101	74.142	47.631	70.224	40.207	47.667
42.362	32.714	32.937	23.531	31.871	26.357	34.648	23.976	32.514	15.389	50.436	25.527	32.837	36.334	22.77	49.756	21.253	47.263
42.712	14.974	20.795	14.474	15.536	14.318	15.989	11.069	18.353	7.3625	15.767	11.335	16.018	15.97	24.073	19.342	13.764	20.867
41.701	28.433	27.542	31.876	30.121	23.719	29.372	21.252	29.285	19.053	31.555	22.295	25.611	33.398	22.757	42.56	19.875	34.925
61.456	64.368	70.347	72.765	77.355	55.453	61.419	66.045	62.85	39.172	60.548	44.653	69.593	51.93	56.841	59	59.029	66.717
28.597	30.942	36.003	26.965	29.245	34.117	26.613	32.251	33.013	26.288	27.11	24.977	31.847	21.376	33.274	20.626	35.197	29.599
25.207	28.416	36.315	26.965	27.218	26.08	24.149	24.524	26.005	25.784	27.11	22.401	31.086	21.376	34.371	24.494	35.062	25.488
27.301	56.162	54.734	39.603	54.654	69.32	41.373	46.808	50.441	48.956	49.028	64.815	60.199	31.276	81.178	39.874	49.136	49.519
35.122	72.056	72.287	75.492	67.153	69.607	60.245	60.227	63.121	60.604	59.453	71.812	75.355	76.659	72.634	70.384	56.808	66.584
32.299	64.884	72.287	51.871	68.665	70.011	71.958	42.52	55.203	47.389	56.502	51.172	44.218	41.712	53.314	61.401	41.908	73.434
43.949	61.755	107.85	49.611	99.357	42.081	73.854	39.712	56.092	30.536	57.852	119.43	53.541	101.98	44.493	88.42	40.161	73.434
50.746	61.755	74.754	50.255	72.196	58.318	70.89	48.454	61.112	49.542	57.386	64.418	53.569	53.75	59.587	51.338	61.553	57.992
52.078	91.104	102.76	82.796	78.743	90.599	82.765	107.74	82.053	81.818	86.25	112.09	96.735	94.909	100.23	81.124	104.78	81.542
68.541	53.288	58.794	60.32	70.923	70.843	60.496	114.26	61.955	81.593	39.212	44.543	46.346	27.687	54.242	29.905	76.759	36.065
81.64	32.558	32.545	60.708	48.498	49.17	45.063	53.808	51.852	62.238	31.803	34.696	35.621	38.582	46.084	36.697	42.824	37.259
108.57	85.096	89.051	106.76	84.98	105.49	89.714	166.46	83.337	122.73	80.132	81.677	93.578	77.733	103.26	72.01	96.614	69.857
84.03	44.949	41.02	72.477	36.793	66.813	60.952	73.633	64.287	74.214	39.626	56.635	49.92	52.089	49.492	48.219	63.496	47.197
60.042	65.457	48.433	79.261	52.084	72.769	73.056	73.224	74.08	84.136	59.215	58.48	64.681	51.386	67.333	66.717	72.279	68.703
79.322	78.115	72.825	97.032	84.298	91.62	108.79	76.631	84.342	97.977	76.292	78.121	95.63	83.712	96.918	75.672	107.9	74.541
170.61	138.88	130.42	149.93	158.79	146.37	146.08	136.67	148.41	148.03	124.37	142.12	120.8	156.04	117.28	147.45	114.99	143.01
155.81	131.1	126.87	136.26	140.76	117.44	119.37	122.48	144.71	135.62	134.41	164.03	134.91	150.87	142.51	144.26	148.56	135.51
145.24	73.885	62.247	129.31	78.864	106.03	103.19	101.22	103.94	121.47	78.008	81.701	69.993	61.947	78.375	63.326	70.129	78.583
110.74	114.09	92.417	155.02	89.787	121.53	138.72	145.98	127.38	162.05	98.828	102.37	120.31	120.6	129.38	115.75	137.71	106.93
104.2	100.45	82.272	115.64	81.591	105.73	108.66	119.1	98.018	121.08	81.48	94.032	111.89	65.656	126.52	60.883	132.15	80.577
122.25	91.877	92.669	114.89	108.66	101.37	97.966	109.03	94.925	106.57	88.375	78.792	87.05	97.393	77.085	102.04	87.678	100.09
69.179	89.976	92.832	115.37	89.587	114.03	100.55	113.85	113.02	107.83	71.523	74.035	77.469	105.12	78.257	76.232	90.057	71.973
154.38	111.48	109.06	135.26	103.97	128.85	114.25	129.56	125.51	154.9	120.53	133.25	106.65	152.36	93.033	150.94	96.753	141.05
232.04	178.05	197.41	150.26	203.93	144.39	200.12	129.56	183.57	154.9	203.63	204.7	190.27	208.77	165.29	200.19	126.48	189.7
165.19	156.92	173.32	116.85	176.16	109.42	171.76	98.609	145.24	93.152	138.31	169.46	129.88	178	109.31	161.68	94.786	149.13
221.57	201.82	180.93	165.91	205.45	173.58	190.64	174.15	199.81	129.01	177.04	236.65	197.34	178	185.58	161.68	193.95	149.13
189.98	181.38	152.7	154.04	178.72	162.79	170.26	130.37	166.94	139.59	182.42	187.49	174.59	194.23	167.65	187.25	148.33	159.52
113.47	145.11	122.18	146.01	145.37	147.1	142.99	129.89	145.73	139.59	135.61	132.41	155.18	125.64	160.58	131.61	169.05	127.73
86.555	193.91	148.1	156.31	165.94	148.91	182.29	130.59	177.86	128.61	240.24	179.14	191.41	230.86	142.71	251.58	146.14	236.44
91.946	115.87	96.564	152.63	119.78	148.91	109.23	121.67	148.74	148.72	122.57	151.82	115.73	138.27	116.73	131.77	133.3	120.21
69.74	79.775	59.246	83.603	61.455	87.727	50.091	92.207	75.337	94.361	89.949	98.946	87.461	105.34	89.381	89.854	83.801	83.437
107.84	73.116	78.446	87.324	57.162	100.92	51.03	101.75	88.914	117.68	67.594	88.644	72.304	73.865	62.315	65.837	76.881	74.696
78.87	70.508	76.527	78.648	79.361	76.304	76.864	77.492	85.29	85.528	67.594	51.838	72.304	57.485	77.881	57.813	85.092	65.851
96.12	86.444	63.643	101.32	73.193	105.31	99.221	124.09	92.121	116.87	73.469	53.328	84.222	54.496	83.949	57.813	88.755	73.13
81.515	81.977	63.613	101.32	71.601	105.31	75.366	121.86	88.245	120.26	81.932	70.782	90.003	72.955	87.609	74.206	95.786	74.281
98.046	55.305	53.64	79.826	59.413	70.492	69.886	76.401	79.385	87.173	45.457	57.513	38.823	67.493	36.814	62.14	36.15	53.894
124.84	166.17	153.03	118.19	139.32	118.46	127.57	120.73	118.34	113.29	176.77	174.83	177.88	188.92	132.78	167.6	129.26	168.03
62.773	56.132	51.656	51.412	51.195	55.142	55.27	91.437	48.896	41.66	59.92	40.202	56.539	41.176	55.819	40.849	59.394	56.178
55.052	48.025	51.656	51.412	51.653	39.288	55.27	44.132	44.988	30.418	52.097	50.788	51.831	37.557	49.458	39.059	53.066	46.537
51.251	48.025	51.347	48.756	51.653	37.941	49.112	32.126	47.097	30.023	45.721	42.173	46.281	37.557	49.458	42.041	50.613	59.852
37.231	48.756	37.779	46.068	37.751	52.841	37.577	53.138	39.689	55.561	51.176	33.292	42.088	29.465	70.369	47.186	53.578	45.337
37.001	35.593	52.211	65.704	44.155	44.397	32.319	39.633	46.638	39.956	32.349	37.264	38.639	32.204	48.616	33.788	46.263	40.978
72.279	65.217	52.211	82.192	53.192	63.855	59.578	59.365	76.861	70.575	60.316	58.864	62.358	54.996	60.477	50.849	66.591	82.304
76.055	72.091	79.27	82.763	88.82	65.253	99.861	68.594	79.179	70.575	78.747	97.864	76.297	85.115	70.201	82.029	65.234	73.003
107.91	45.379	62.766	63.861	56.936	62.429	54.261	69.781	46.442	83.281	51.494	86.011	41.834	78.456	57.749	75.148	58.196	48.405
125.98	81.883	93.353	66.781	83.67	64.846	87.909	57.278	68.413	60.772	66.708	116	75.86	98.839	71.989	77.853	85.1	71.777
89.323	125.92	104.6	116.36	119.05	115.61	121.61	127.69	116.03	120.73	120.77	109.8	126.2	104.11	118.34	134.14	104.51	119.39
89.323	82.684	85.76	67.132	80.76	65.536	80.038	73.729	72.441	79.464	80.638	87.378	77.108	95.575	71.377	81.558	71.457	75.948
154.77	82.684	103.59	67.132	104.01	65.536	83.328	89.087	72.441	79.039	92.92	134.38	77.108	134.27	71.377	104.51	71.457	82.34
102.56	73.798	87.541	81.309	79.421	69.384	88.602	106.64	90.837	87.622	77.013	124.19	67.898	86.737	57.952	77.738	54.663	61.972
161.97	156.5	163.78	140.6	163.7	136.33	152.64	132.18	151.64	140.88	154.72	160.04	154.26	172.9	135.91	155.14	130.01	153.34
68.094	62.752	75.631	60.414	60.621	62.511	49.909	75.151	47.735	85.877	60.011	60.712	66.763	64.957	76.254	72.605	80.484	57.81
65.842	73.304	71.283	77.578	64.525	76.127	72.136	100.14	58.549	104.33	67.709	94.84	78.139	67.765	89.584	63.309	82.888	68.284
78.069	117.51	88.236	152.31	99.769	161.48	123.89	179.92	148.83	153.24	93.465	66.963	120.34	69.107	120.83	75.988	120.03	104.15
117.05	111.75	126.01	123.94	125.93	126.69	113.85	127.01	111.12	126.43	93.072	80.861	115.53	73.968	116.41	102.07	120.03	108.53
72.413	62.128	68.74	106.97	74.494	90.802	78.753	127.01	73.009	105.33	53.973	72.23	65.119	42.663	60.438	46.122	63.673	60.967
74.724	43.825	55.207	61.887	64.561	68.218	75.391	66.904	69.126	76.895	39.591	75.226	36.884	48.867	33.858	40.607	38.631	40.382
68.426	74.609	95.314	64.542	93.272	83.116	91.142	82.754	84.65	97.863	71.427	94.782	63.447	91.045	58.817	91.271	64.621	74.118
108.34	90.087	84.744	112.51	87.525	99.243	96.696	90.972	128.77	89.447	87.601	129.91	84.703	108.92	69.19	98.607	69.944	81.216
123.98	92.746	102.4	76.617	107.72	71.99	91.98	80.683	79.461	97.452	90.252	138.01	85.461	108.92	88.019	104.79	96.767	97.007
80.378	86.218	102.4	111.15	102.22	115.52	106.36	141.25	88.287	171.01	94.481	124.95	100.18	78.059	104.35	82.632	123.97	76.23
130.66	132.6	130.8	127.91	141.95	152.32	128.96	141.25	146.05	164.25	123.97	126.36	155.14	106.63	158.52	108.22	173.26	113.14
177.41	122.4	134.44	150.37	134.67	144.66	143.31	155.07	138.95	111.3	102.36	146.81	99.24	120.49	89.873	122.34	89.973	112.7
120.64	73.347	73.278	68.689	80.325	79.359	72.493	70.031	75.463	72.567	72.285	82.989	64.855	89.496	62.937	85.365	59.202	67.935
94.334	71.831	71.134	68.689	80.325	68.314	72.493	74.407	71.471	84.81	72.285	82.989	64.855	73.386	68.423	66.492	71.404	63.009
90.283	59.83	60.165	63.645	66.795	62.499	54.001	67.632	56.927	80.216	55.752	66.532	60.255	54.772	68.423	57.524	59.204	50.649
63.484	35.329	41	60.582	40.162	46.727	30.872	49.117	40.632	60.181	34.918	46.503	35.64	37.437	38.077	38.467	38.273	40.027
72.235	88.502	107.29	89.235	103.96	85.004	95.539	86.312	90.226	83.815	71.252	67.704	82.52	59.262	70.572	59.679	73.774	78.247
102.9	71.508	99.04	51.573	97.162	47.156	78.707	37.537	77.577	37.147	65.681	133.2	52.466	128.3	41.799	95.446	40.792	90.46
53.426	28.96	40.418	28.947	30.141	29.493	22.761	31.772	20.513	37.399	36.226	75.823	35.265	56.984	37.029	42.662	34.938	31.87
56.784	47.916	46.937	28.889	41.817	32.813	44.643	26.237	36.733	21.721	56.916	68.68	46.096	71.892	58.009	68.746	37.137	65.227
99.283	45.813	57.912	40.652	45.81	38.901	44.095	31.02	43.191	29.594	54.58	52.578	53.363	56.022	59.518	54.139	48.629	48.485
38.816	32.031	20.387	21.018	26.007	27.01	38.405	19.467	29.977	18.533	39.054	23.48	44.765	15.598	36.589	20.285	34.312	48.012
36.291	23.477	18.422	32.413	17.753	21.592	23.474	20.636	25.44	20.903	33.274	13.859	27.665	23.632	24.942	24.531	23.81	38.358
47.953	19.194	27.785	16.251	25.3	15.413	19.312	12.595	21.386	10.552	20.871	16.122	20.545	19.673	17.193	21.156	19.525	27.984
46.973	32.813	34.142	22.116	29.056	22.67	44.589	17.814	32.552	16.07	36.512	22.15	30.591	39.732	26.983	37.181	24.459	38.661
21.995	18.731	16.944	18.207	16.447	15.558	26.178	15.303	19.44	16.07	24.51	11.672	27.31	21.822	23.757	24.378	25.947	25.273
20.959	11.073	20.492	10.158	11.09	8.5768	9.6369	8.9224	11.648	8.3889	13.298	13.765	12.079	9.3372	13.845	10.81	14.718	13.741
16.499	11.073	14.775	11.514	12.659	11.56	13.675	10.895	16.803	6.6544	15.095	9.2583	12.079	7.6793	12.442	10.621	10.881	14.383
18.156	24.955	23.041	17.21	25.501	21.867	28.174	17.316	26.77	14.073	26.767	15.816	23.679	19.907	20.941	20.969	19.739	31.035
17.262	24.955	23.041	24.824	25.501	26.733	28.174	20.36	28.783	15.559	20.124	15.159	23.679	22.631	21.255	20.969	22.577	31.035
18.955	21.142	20.779	19.076	25.426	19.304	17.575	22.044	26.2	16.252	27.644	10.097	23.163	22.631	19.942	19.34	16.22	28.427
28.264	37.778	39.426	31.906	38.066	36.042	37.562	27.46	40.642	20.258	36.907	29.801	36.659	37.905	26.776	29.75	26.735	36.612
41.462	70.733	85.328	65.744	76.622	64.97	69.084	87.559	69.126	80.013	47.427	47.243	65.335	49.412	45.56	44.754	50.733	51.631
17.423	20.619	25.115	20.751	22.622	20.097	45.291	20.508	23.547	15.432	21.466	16.256	22.386	31.208	20.987	21.504	21.375	25.092
22.084	33.557	33.002	27.399	43.275	32.951	30.885	24.345	33.391	26.445	32.825	25.611	33.845	24.398	30.55	29.182	35.445	33.973
51.566	38.685	45.466	36.182	43.275	33.894	33.172	32.879	41.692	31.329	38.283	37.449	41.103	29.241	53.423	35.31	47.267	38.933
37.062	30.76	28.284	24.821	29.469	26.148	32.862	24.834	25.792	24.027	40.122	31.182	34.615	29.241	43.841	37.692	36.219	34.091
42.37	46.018	58.067	48.4	46.118	54.447	47.927	32.537	46.795	31.407	52.594	48.206	47.558	42.879	51.918	55.899	46.94	55.369
83.779	112.23	113.43	69.594	122.03	70.242	102.26	62.677	101.66	68.593	106.34	124.92	111.13	92.194	109.89	115.79	86.863	99.578
46.835	48.9	39.11	56.86	49.189	50.205	45.076	48.911	48.512	43.994	50.385	37.177	54.676	46.671	56.883	51.646	36.874	49.53
74.708	67.118	69.139	80.735	70.586	67.274	81.022	52.51	79.677	56.832	66.73	46.691	71.89	64.225	71.623	63.43	72.479	69.047
70.8	67.118	56.963	79.975	63.62	67.072	63.306	74.212	71.534	66.594	52.075	51.143	60.715	54.25	60.453	53.036	66.629	61.475
89.497	129.29	147.36	179.88	114.51	146.66	151.05	134.41	174.19	130.48	83.982	100.35	98.482	86.953	124.56	74.056	128.65	85.03
90.024	106.03	147.36	132.57	110.75	124.1	117.24	102.43	132.32	105.47	67.279	96.603	77.032	64.829	96.076	82.797	86.708	71.564
83.48	64.134	73.677	75.646	68.892	67.148	64.563	67.414	64.609	79.253	54.258	63.724	63.459	54.171	69.287	60.504	74.581	58.933
83.48	55.157	51.057	70.54	49.93	65.817	58.847	69.984	70.176	70.511	59.537	55.646	63.689	54.171	69.287	49.937	69.271	58.294
93.041	85.781	80.279	103.1	75.82	87.187	87.235	123.07	102.44	112.4	74.179	57.711	85.355	64.46	79.388	72.376	70.534	81.767
144.42	100.74	107.31	115.62	113.86	116.52	112.6	101.15	131.62	90.867	82.224	67.868	97.886	63.766	93.46	74.774	87.802	87.926
66.802	67.063	76.157	76.626	91.328	85.753	74.011	97.568	73.785	90.867	68.213	80.955	60.139	81.332	85.579	82.581	59.004	78.463
117.11	85.817	81.878	115.6	98.769	114.27	95.143	102.93	91.311	110.93	89.014	80.955	88.429	70.817	116.86	74.819	82.754	93.009
90.268	69.951	68.44	97.143	64.783	79.849	71.701	138.07	81.584	107.86	68.485	78.348	74.063	69.318	85.995	65.583	92.401	64.847
76.225	64.229	77.878	94.646	77.441	78.895	79.62	65.31	96.546	83.918	52.474	109.9	51.03	68.624	47.339	74.494	61.207	61.11
58.247	65.456	65.947	85.559	80.902	68.056	83.999	81.491	96.546	84.457	55.68	49.729	60.842	47.341	62.571	55.148	61.838	68.565
129.18	65.456	66.781	66.559	67.151	67.657	67.222	70.598	54.156	83.608	53.984	87.23	53.413	79.577	50.719	73.72	50.703	64.043
91.918	106.68	74.811	104.72	67.151	104.64	79.248	108.86	87.381	115.09	86.92	95.958	103.58	97.25	91.988	99.288	92.303	97.563
103.65	99.621	111.17	112.75	104.7	113.99	103.08	92.191	98.742	87.85	109.27	142.53	104.81	127.02	96.277	117.88	90.414	107.84
176.88	85.698	125.81	84.142	102.54	80.515	86.929	80.357	79.434	81.125	103.23	170.65	90.452	151.51	80.583	119.22	68.428	103.91
160.78	160.43	139.31	160.1	166.63	177.03	154.94	177.07	144.69	168.94	133.11	139.52	185.72	131.5	176.6	121.32	183.05	116.74
163.4	107.21	98.931	124.68	112.86	116.82	115.25	181.17	117	167.8	120.06	111.18	109.42	101.14	106.7	109.77	126.16	98.651
156.09	111.81	114.53	121.68	110.01	111.47	111.33	111.9	110.87	120.87	99.193	124.58	90.058	102.14	85.155	106.24	84.569	100.5
156.09	131.04	138.9	112.26	131.95	117.42	144.09	143.48	127.92	83.806	139.79	164.36	125.57	147.97	128.65	148.89	127.65	136.46
158.55	140.46	136.44	119.18	131.95	125.79	144.09	125.03	121.58	107.99	147.4	142.69	141.57	158.62	137.35	165.36	117.35	144.27
137.91	130.06	134.98	131.55	124.64	134.35	112.87	125.03	118.27	132.52	137.48	104.31	120.1	115.37	132.02	159.97	115.84	141.16
137.91	130.06	139.78	100.5	124.64	107.08	108	114.87	108.55	120.71	144.51	165.53	120.1	174.56	113.32	159.97	115.84	146.73
121.79	151.64	148.86	129.33	132.39	124.31	167.97	119.14	137.47	120.71	140.85	122.01	131.91	119.39	119.4	136.18	122.98	159.7
77.45	101.54	98.857	112.47	107.05	112.6	96.756	114.03	102.6	112.14	99.179	81.019	97.565	86.96	96.684	91.63	90.278	101.78
85.762	120.16	128.15	115.07	138.05	133	120.45	119.84	102.6	107.65	116.28	138.56	117.88	133.96	107.78	123.81	97.567	122.56
52.882	54.474	73.688	76.58	76.774	67.354	57.424	72.219	64.825	76.872	49.645	75.779	53.144	68.796	66.423	59.781	52.366	55.924
82.378	84.902	104.99	101.6	79.966	88.24	103.48	90.309	66.696	110.64	62.488	106.44	73.399	85.045	84.54	85.542	88.568	74.16
135.22	119.33	135.93	115.27	102.08	113.84	105.08	127.36	121.44	133.72	109.71	137.63	131.94	93.292	148.72	103.61	123.39	117.14
213.42	104.91	131.14	106.1	126.32	102.2	116.84	100.25	97.045	106.48	121.02	163.51	111.95	143.2	105.53	142.27	107.38	127.64
180.47	82.807	126.96	106.1	90.171	112.79	86.968	132.8	97.045	170.68	76.64	125.36	82.667	118.33	95.615	94.528	98.302	77.281
70.31	82.807	80.829	97.666	77.104	90.481	75.445	96.728	77.831	111.92	72.808	91.888	81.219	98.968	91.771	76.202	97.712	77.281
73.958	63.713	81.902	75.934	85.606	74.626	80.659	63.005	61.375	68.185	64.595	84.352	64.829	93.192	73.605	69.166	70.233	63.686
67.799	85.763	83.61	92.746	87.35	105.72	81.09	106.55	94.491	111.72	74.084	93.032	96.415	79.295	107.71	83.579	108.42	78.322
59.568	84.387	80.814	92.693	85.55	92.122	73.913	106.55	88.542	90.065	74.084	75.996	77.871	57.129	74.599	62.37	103.31	76.16
79.949	83.503	58.097	102.31	71.058	101.56	91.607	163.67	95.798	106.63	75.98	50.567	71.148	65.032	96.694	65.055	103.82	67.591
89.194	59.421	84.975	72.745	69.307	65.617	62.318	79.136	72.449	99.88	57.944	85.403	55.365	65.032	65.965	65.055	66.795	52.649
118.66	79.38	93.84	125.92	80.376	114.23	82.222	104.19	85.349	90.851	85.509	104.61	78.146	91.775	88.07	95.084	68.214	90.125
132.41	79.38	107.61	82.509	102.56	80.434	90.008	65.006	95.053	62.437	94.549	104.61	73.972	91.775	74.895	95.084	68.082	102.48
79.027	61.845	99.079	62.714	79.534	57.084	66.283	53.452	68.257	55.858	71.924	75.329	62.561	76.672	74.254	69.763	49.999	59.298
105.98	61.845	100.15	65.526	73.842	56.011	66.283	45.637	64.04	44.587	80.678	105.72	62.561	93.816	57.558	88.023	49.745	70.481
80.805	45.433	77.893	37.899	73.842	34.096	58.38	23.406	52.886	26.651	53.088	95.268	46.515	76.025	56.928	57.575	42.494	55.651
42.142	20.206	29.212	21.761	26.036	17.472	27.225	12.761	29.114	9.1971	27.876	34.357	21.811	24.151	19.198	24.983	19.722	28.907
14.686	23.261	22.281	18.827	25.481	19.428	24.204	12.761	24.527	9.1971	27.876	18.43	22.503	29.317	23.212	29.26	20.844	28.907
22.331	13.652	16.608	8.1868	16.709	11.63	17.357	9.7281	13.049	8.2856	18.631	14.261	21.278	22.004	13.849	25.806	13.595	18.517
26.618	14.718	16.608	17.155	18.423	14.689	17.357	13.693	15.823	12.175	17.72	14.261	23.498	21.746	15.166	19.96	13.764	24.448
27.672	24.918	27.646	13.044	19.631	13.887	18.293	12.646	16.609	10.217	35.131	45.12	21.972	43.643	18.581	43.37	17.794	33.012
52.363	44.444	42.383	34.996	45.223	30.812	47.186	31.135	43.165	22.335	57.687	45.12	43.29	55.786	50.709	61.79	46.421	62.47
38.608	37.4	36.04	34.394	34.315	29.73	35.594	24.345	36.456	24.06	39.583	37.227	38.656	32.798	32.339	33.132	49.348	57.98
34.604	23.239	24.845	21.067	15.592	25.802	22.405	17.009	20.953	17.813	35.08	28.974	29.692	18.79	32.327	25.396	49.348	30.753
22.124	23.239	29.832	34.924	20.115	26.735	23.364	18.86	26.321	17.813	25.897	20.111	28.909	18.122	29.653	25.563	31.66	30.753
21.252	47.066	39.347	36.461	36.217	44.777	44.278	53.978	51.428	36.365	47.019	25.429	48.093	33.445	46.4	35.389	50.868	43.129
26.524	18.26	23.565	42.157	26.827	19.245	17.964	14.951	19.916	16.467	19.204	16.418	23.886	17.438	16.536	15.554	18.978	17.89
27.461	31.263	33.664	27.821	32.49	27.571	33.165	23.636	33.068	24.696	34.457	28.017	35.69	29.203	48.948	43.345	36.175	43.998
30.96	87.49	113.03	99.218	123.4	72.762	59.177	63.212	84.521	65.436	56.414	52.578	88.317	71.055	60.718	67.415	58.535	62.443
37.52	66.842	72.705	57.314	56.324	73.944	51.197	65.009	80.123	66.456	44.617	35.906	70.738	46.287	82.641	39.29	46.14	65.441
46.593	71.373	90.757	78.613	67.036	65.085	68.778	53.131	74.75	44.093	71.772	77.1	70.63	44.113	65.197	56.265	63.501	67.524
34.411	54.152	59.343	44.376	54.127	49.824	56.501	35.169	61.75	34.109	50.664	47.036	50.153	38.926	65.197	42.844	53.52	50.793
37.905	48.428	53.775	41.762	56.206	45.42	44.708	40.522	52.408	30.623	58.389	32.718	48.158	31.481	40.335	51.987	50.276	55.893
23.845	28.976	38.606	36.649	34.622	27.429	44.708	21.922	29.626	19.568	34.95	25.261	34.187	24.793	37.541	20.804	51.502	32.907
19.28	18.829	21.462	15.548	14.002	17.257	15.164	13.002	20.411	14.888	17.234	14.468	21.095	19.587	22.641	18.163	15.665	23.108
12.095	18.829	17.6	17.851	13.429	27.376	15.125	13.002	20.411	21.646	17.234	14.468	17.291	14.627	22.018	18.163	27.793	23.108
28.895	40.431	56.017	87.731	26.513	61.436	62.755	28.268	60.412	28.436	38.048	22.865	30.298	26.1	32.796	56.326	31.441	37.088
43.005	36.1	33.121	43.094	58.759	30.239	36.422	27.551	49.692	27.505	31.772	26.132	44.016	25.501	34.896	29.742	36.132	43.398
16.506	29.725	29.537	25.25	34.096	29.797	30.932	27.551	27.583	27.505	24.376	19.552	44.016	28.726	34.896	20.462	36.132	25.783
20.182	27.688	35.416	22.121	33.418	17.533	25.761	23.285	20.898	22.072	18.596	30.216	31.483	32.373	23.746	19.382	26.714	22.231
29.955	30.146	32.347	34.854	24.894	26.473	27.927	25.575	37.032	31.592	35.704	25.823	35.075	30.314	41.12	30.955	30.177	30.689
46.36	51.969	43.211	65.51	44.428	53.98	46.639	52.788	52.189	50.44	62.452	39.898	56.473	53.77	65.377	57.224	53.809	58.407
39.132	51.969	47.547	54.305	44.967	46.735	46.928	50.016	52.189	49.513	64.52	45.273	56.473	54.859	41.329	59.6	53.809	58.407
36.382	52.114	44.274	65.902	47.421	66.655	35.569	57.76	49.237	62.573	57.851	31.875	48.201	31.015	46.297	37.431	33.193	34.57
87.568	68.246	72.171	59.197	75.462	62.68	62.869	61.124	68.255	62.825	82.378	65.252	81.96	71.032	98.56	74.348	73.697	66.913
108.45	124.83	140.57	97.833	125.55	105.52	107.53	73.062	119.67	67.655	147.06	119.98	120.87	125.63	153.61	130.44	102.02	150.45
108.45	81.468	118.47	70.559	75.619	82.25	63.057	73.062	59.059	67.655	111.29	119.98	98.889	103.04	108.23	103.73	90.594	82.088
60.769	87.253	84.356	104.49	103.3	103.92	93.395	94.781	99.247	82.605	69.411	89.954	67.967	82.999	80.251	76.327	65.097	79.13
121.08	126.3	137.3	157.61	154.66	131.76	140.51	123.75	133.94	121.41	110.74	124.85	124.05	115.9	127.19	126.04	117.5	112.64
126.24	113.78	131.81	157.61	109.03	131.76	114.26	123.75	133.94	116.52	123.59	126.36	120.31	146.42	120.64	141.93	114.41	125.96
138.94	162.75	153.89	167	151.42	148.97	151.72	136.88	157.62	135.18	158.56	144.08	154.46	152.1	138.66	147.06	135.96	166.98
175.1	89.317	146.15	98.967	141.73	81.429	120.55	72.835	96.145	68.616	92.337	146.4	85.329	102.68	86.693	96.889	80.796	98.422
117.92	87.28	120.5	99.075	134.17	94.095	97.686	109.55	90.35	88.443	100.46	108.57	91.928	89.38	96.228	78.982	101.41	82.076
133.98	114.73	171.72	115.62	181.45	112.25	157.54	165.03	140.24	165.11	98.793	144.97	103.28	108.03	114.36	104.37	138.69	100.99
52.72	114.73	103.98	131.2	122.9	127.03	130.82	137.24	140.24	132.39	100.02	97.982	113.06	102.22	117.25	95.332	130.91	100.99
88.627	111.19	115.26	131.2	106.88	127.03	94.722	137.24	103.17	132.39	100.02	123.8	113.06	102.22	117.25	95.332	130.91	85.595
88.627	85.692	77.877	120.49	93.459	115.46	91.215	139.99	104.52	143.75	70.542	62.111	84.155	60.972	101.88	61.595	100.39	66.906
117.74	95.571	112.4	91.569	85.525	99.967	83.631	101.65	98.741	106.28	97.42	117.08	94.415	101.75	104.56	103.09	82.654	93.367
102.89	77.606	95.521	81.615	84.721	78.885	63.233	87.571	65.087	110.7	71.287	127.08	72.114	89.967	75.986	82.554	78.731	71.326
136.04	120.66	145.32	136.51	108.58	113.26	99.975	137.89	99.04	160.29	100.42	139.27	116.52	164.79	119.37	138.17	130.62	97.062
126.67	97.442	105.41	125.38	122.7	127.63	108.74	163.21	109.91	175.97	77.202	89.482	93.081	86.409	118.86	84.014	134.46	77.752
76.287	92.346	83.548	125.38	77.553	127.63	87.005	189.5	103.93	153.2	88.024	90.368	88.751	54.445	95.129	55.664	94.703	77.752
109.48	97.385	88.719	109	102.51	113.13	109.05	141.9	114.84	103.2	90.054	93.813	89.905	92.735	95.129	94.752	92.639	85.663
105.21	83.223	111.68	95.637	105.85	76.091	98.948	82.45	93.197	93.246	87.73	123.58	77.971	92.735	81.301	94.752	69.199	87.649
77.415	74.917	51.705	95.637	56.84	91.256	101.55	105.95	86.618	109.17	85.65	40.018	69.792	56.129	95.236	68.362	63.371	73.777
103.84	104.47	107.92	135.81	112.62	121.19	108.51	124.24	110.58	121.15	112.69	102.87	106.29	96.031	126.68	92.031	86.548	96.829
113.71	62.376	85.25	94.755	86.938	96.303	74.627	92.825	72.296	108.68	89.982	133.1	72.919	134.7	78.919	126.62	83.89	87.231
120	85.621	104.16	94.755	107.89	96.303	107.36	84.562	102.81	86.788	88.949	126.51	87.313	109.26	82.197	106.62	86.189	84.468
103.6	66.737	73.343	74.417	76.76	76.408	76.69	86.792	79.164	86.788	82.38	81.54	64.075	78.798	64.928	73.324	72.837	79.895
92.622	93.704	64.65	96.281	82.547	92.862	85.03	81.314	102.83	84.541	82.648	75.295	106.31	81.155	101.21	87.141	87.849	77.635
86.448	56.664	52.86	107.33	55.625	102.35	81.436	107.48	79.36	113.42	47.753	43.585	60.339	53.036	68.547	58.817	81.943	63.131
73.899	97.693	80.093	109.84	82.432	138	88.241	134.47	98.684	129.7	76.477	82.287	105.19	59.378	108.83	70.087	122.51	73.35
108.34	69.442	51.758	79.87	54.771	90.48	75.019	93.075	84.048	101.16	87.069	64.98	83.537	66.45	68.882	73.605	71.881	91.073
148.91	144.94	130.24	136.21	129.72	140.93	128.35	132.77	146.76	126.65	144.32	155.34	140.38	146.9	137.26	155.52	110.19	144.51
85.402	113.22	92.773	107.23	94.861	100.31	102.44	102.41	102.7	106	110.72	117.47	109.71	101.39	107.09	109.55	108.44	99.407
71.77	72.601	81.382	72.5	89.428	58.723	65.476	62.658	65.097	64.602	78.725	95.749	73.657	82.824	68.557	78.366	65.611	82.384
93.19	80.829	73.571	126.19	96.405	110.48	100.2	76.946	108.36	81.07	90.906	81.295	77.919	82.812	74.325	65.774	86.71	85.621
70.287	50.903	73.93	30.856	68.557	33.247	63.176	26.794	48.379	27.748	58.403	89.469	50.375	77.095	47.647	72.616	49.72	55.072
72.86	64.316	91.424	85.42	66.117	85.855	68.052	75.883	81.892	74.682	73.708	81.531	83.466	77.438	85.584	67.832	84.628	64.168
146.01	117.44	118.89	94.24	121.84	104.47	114.25	81.399	106.54	58.529	117.08	114.52	116.34	110.64	106.69	107.76	113.51	105.8
90.162	70.82	73.771	103.4	79.014	83.734	81.347	142.22	74.556	95.585	85.93	77.222	66.867	70.894	64.305	63.107	72.188	82.699
78.703	103.14	67.32	149.31	91.219	111.18	102.44	135.2	100.36	114.54	107.37	53.013	105.54	76.333	81.39	81.73	80.962	85.44
132.71	141.22	128.11	163.84	142.01	164.22	119.02	143.93	145.73	151.71	125.41	114.68	127.03	103.3	126.86	104.37	127.24	104.7
140.98	102.17	98.488	146.19	112.22	130.39	117.37	141.72	120.21	147.47	94.055	96.24	98.122	85.8	97.208	98.191	120.24	94.801
81.187	153.26	121.53	131.45	121.6	152.34	128.1	159.13	120.87	150.97	141.15	109.18	153.55	131.94	173.76	131.31	161.22	135.31
81.134	121.1	108.68	128.08	87.392	128.01	91.269	138.19	104.5	144.91	127.05	88.915	123.45	112.69	133.83	111.07	121.68	113.84
66.964	57.034	58.133	92.86	56.036	86.377	60.928	114.41	66.837	127.52	51.536	70.943	61.268	73.424	71.647	68.665	83.676	69.359
98.64	89.326	91.215	168.62	97.305	150.18	125.69	187.39	129.99	151.34	75.992	86.293	89.192	86.21	80.53	87.744	108.97	89.401
104.83	75.079	110.02	81.869	85.207	78.165	82.725	108.48	78.791	88.795	78.817	94.437	71.033	86.581	77.507	84.07	69.617	78.739
100.29	86.825	99.949	71.606	103.22	68.037	100.46	68.084	88.3	60.79	85.31	118.78	72.967	106.82	70.317	87.759	64.181	85.652
72.259	42.502	56.723	78.149	63.56	54.374	61.047	55.11	64.615	71.196	46.21	41	43.654	96.802	47.52	26.81	50.427	44.226
153.31	102.8	125.77	103.81	123.44	99.315	101.87	109.78	78.683	113.66	100.83	166.56	93.422	149.48	105.7	134.63	109.68	112.54
90.102	63.733	79.248	72.85	73.956	78.063	59.388	91.903	60.215	99.277	67.479	80.91	56.383	64.875	72.197	58.785	70.292	56.72
89.641	112.88	97.481	126.48	95.212	117.75	97.704	127.58	106.78	126.02	91.526	104.57	106.44	84.622	97.404	79.406	99.47	87.297
85.019	84.635	84.813	100.16	89.069	108.61	88.036	114.92	94.114	124.51	84.622	76.517	99.989	62.775	87.491	73.938	106.07	75.861
111.84	71.966	77.844	100.16	75.504	97.908	66.249	82.18	76.04	85.087	60.677	83.661	68.243	54.786	75.56	53.942	71.515	59.865
79.298	61.795	70.951	105.69	71.792	89.776	76.428	90.313	76.04	70.829	48.796	62.049	54.529	51.544	61.318	49.29	77.164	52.46
93.51	84.915	125.89	98.277	99.955	92.212	82.979	82.976	82.283	90.651	78.26	131.42	81.863	106.46	75.641	90.635	87.178	89.335
96.888	68.185	82.839	49.919	78.139	49.531	67.986	40.712	54.385	52.4	95.233	103.03	70.218	106.46	82.004	91.347	66.131	79.452
190.55	167.53	174.71	115.54	162.64	129.51	144.88	117.09	139.55	120.08	151.69	213.28	159.01	175.17	156.68	157.62	163.7	143.43
128.72	142.03	169.57	143.66	151.88	131.02	142.58	140.99	139.55	157.59	151.69	192.5	136.99	166.83	139.67	154.51	156.84	143.43
151.93	116.81	134.59	128.11	111.44	120.19	106.94	114.19	124.62	119.37	137.38	160.46	136.99	154.34	118.89	135.24	101.21	127.01
144.29	118.9	119.22	118.5	132.27	111.53	118.6	105.41	118.01	119.37	105.45	134	119.77	135.36	125.71	125.71	128.06	104.15
92.058	84.817	93.872	107.74	74.863	92.335	75.7	102.95	92.391	121.66	72.144	90.332	82.991	92.045	85.757	76.251	102.59	79.938
87.952	75.881	88.356	62.571	89.633	62.817	77.076	66.438	79.323	80.08	64.702	88.506	56.923	82.979	63.189	81.131	65.274	62.299
70.531	68.904	87.58	111.28	71.273	106.56	76.718	107.08	93.037	95.929	65.703	63.471	67.534	61.777	79.533	71.434	91.43	69.212
84.797	40.23	47.717	53.953	50.443	60.808	44.898	66.368	52.694	64.287	62.632	34.888	56.807	35.541	51.203	42.618	42.453	48.305
153.53	65.166	72.531	81.87	73.002	76.406	76.119	76.385	75.703	83.451	61.009	64.833	59.586	59.254	61.432	70.214	64.449	66.329
83.3	65.841	67.316	93.655	65.731	83.409	73.976	100.2	84.562	97.251	63.396	83.685	55.743	68.276	69.939	68.486	79.038	63.811
62.113	42.473	67.316	34.584	46.224	45.521	47.634	35.289	60.991	39.775	61.057	73.28	39.861	57.771	36.844	59.569	39.573	52.644
105.66	47.503	64.282	34.318	39.644	37.718	43.861	30.154	44.463	31.623	66.278	82.819	50.756	74.16	53.405	67.418	46.44	55.786
68.807	21.747	28.801	11.558	18.501	17.254	18.209	21.53	15.239	18.983	30.818	60.49	26.869	34.194	24.527	32.266	45.363	27.204
42.22	14.354	19.342	9.6558	15.993	13.694	13.195	15.3	15.233	11.483	25.362	14.901	23.592	21.333	25.275	21.646	35.004	21.135
26.613	11.88	13.855	8.9459	14.318	13.133	12.888	7.2884	12.297	8.0288	23.413	16.546	16.251	14.539	13.665	15.863	12.568	19.096
22.071	11.88	8.523	8.9459	10.628	10.208	12.682	7.2884	8.2	8.299	20.244	16.887	12.387	14.539	11.09	15.863	8.9962	20.596
23.771	14.5	11.911	11.933	11.293	13.336	11.745	9.3155	10.819	9.3508	36.564	9.2347	21.114	12.184	20.85	20.004	16.842	20.862
27.078	15.648	12.714	11.044	14.454	11.985	13.664	11.997	15.39	9.3508	28.506	12.994	23.07	24.134	23.247	22.746	21.303	27.234
18.378	10.619	15.174	8.1507	11.97	9.6753	10.43	11.032	33.299	6.1126	15.296	14.529	10.259	21.992	9.3224	19.937	8.7156	26.48
31.822	15.367	20.719	15.98	18.085	14.003	16.194	11.302	17.952	11.231	21.169	12.189	16.763	15.86	16.715	19.629	16.176	23.847
50.232	12.007	7.4608	15.98	10.095	11.74	13.387	15.087	15.594	9.8008	20.391	7.9256	17.53	14.737	12.577	12.962	12.033	11.856
33.877	8.2018	7.9806	7.0598	9.0563	7.867	13.278	7.1919	8.7235	6.5521	10.277	5.6419	8.6733	5.723	12.417	8.009	11.854	10.014
31.892	13.431	12.83	13.02	10.512	11.546	12.481	8.4352	12.897	8.559	19.582	14.14	17.947	15.05	16.299	19.934	13.246	22.227
35.492	8.9969	7.7448	8.4237	11.972	8.9001	14.53	8.4352	12.217	8.2321	9.5503	4.5419	11.716	5.4359	10.223	7.171	10.006	7.8325
28.719	9.2476	12.039	13.529	10.002	9.5385	10.391	7.7266	12.645	6.9802	11.483	6.3467	12.381	12.069	8.9603	10.528	10.006	11.816
33.051	27.915	23.395	28.652	27.569	26.616	24.097	31.769	37.061	22.406	30.821	14.449	27.7	22.145	25.677	23.674	24.633	30.456
59.908	135.79	110.61	107.8	139.03	129.2	140.6	120.12	133.95	117.19	100.67	72.613	148.98	103.33	112.72	112.49	101.34	135.28
63.813	67.774	64.864	46.131	62.935	58.644	70.726	48.351	59.896	46.031	57.309	49.859	70.798	67.376	59.296	60.076	60.327	68.116
25.384	36.601	39.102	31.313	38.612	28.086	38.741	21.852	42.44	17.191	29.085	33.102	31.269	31.509	31.991	31.356	30.921	33.64
31.636	26.815	34.205	25.22	30.771	18.375	36.343	19.241	38.247	18.53	29.085	34.386	25.217	31.509	27.249	31.356	29.932	33.64
39.636	32.225	36.339	50.562	27.584	25.606	44.405	19.241	38.611	18.53	51.219	35.196	43.756	36.83	42.775	37.559	39.485	43.627
67.572	38.688	40.672	33.45	45.748	33.345	44.405	32.935	43.105	37.581	41.42	38.784	39.656	48.781	38.171	50.752	43.842	51.047
66.368	42.309	49.321	58.657	45.669	45.694	39.608	40.785	39.881	41.597	52.359	37.803	41.18	38.872	40.038	44.754	40.477	51.17
45.774	42.309	49.826	86.658	34.93	48.524	39.949	46.143	35.679	45.479	53.652	45.352	41.18	59.621	38.001	56.725	37.95	46.838
51.154	76.118	69.723	94.995	82.477	80.157	70.905	73.284	92.73	75.345	91.718	69.655	82.413	65.562	80.781	79.034	69.767	78.119
73.917	78.943	69.723	87.702	74.315	80.157	71.895	78.885	85.855	82.425	91.718	95.512	72.024	99.408	80.781	104.78	69.767	72.702
86.474	82.388	96.845	78.238	91.034	69.571	85.799	57.167	102.84	55.936	83.614	102.61	72.626	93.669	63.505	84.156	56.86	89.112
82.664	68.967	83.335	71.046	70.075	63.066	77.295	51.725	65.223	44.982	79.244	74.456	72.683	78.004	69.267	80.758	50.693	81.025
55.189	39.877	65.858	39.489	54.131	37.857	45.915	32.8	46.307	30.815	54.427	57.042	40.663	38.55	37.099	48.55	29.3	48.372
38.55	71.386	90.304	48.614	81.832	53.704	65.632	52.975	62.833	45.484	78.106	63.746	68.296	72.915	65.927	55.727	49.642	65.238
55.685	63.213	75.501	49.499	60.987	50.575	64.844	42.074	58.77	37.149	61.833	51.285	59.722	60.123	59.238	58.859	59.315	71.775
56.717	59.282	63.494	48.666	66.525	49.385	63.762	38.776	61.032	34.268	56.453	46.749	53.803	48.766	51.589	55.965	58.362	73.325
45.101	61.564	59.939	51.052	60.153	48	60.278	42.719	58.4	37.777	60.238	46.794	62.259	51.05	67.773	59.386	63.427	66.044
38.175	35.091	36.219	36.426	40.571	29.531	40.742	33.38	35.582	30.192	30.172	30.435	34.947	39.311	30.156	32.736	40.074	35.852
39.668	46.894	46.829	51.305	45.761	37.638	43.293	34.464	39.837	27.736	42.187	39.427	46.762	45.235	41.849	40.293	47.23	54.527
35.483	41.927	41.364	58.291	52.505	34.675	39.638	36.569	40.387	35.483	38.603	30.053	40.918	33.541	43.857	36.535	38.495	42.156
34.357	52.951	56.481	46.291	55.398	42.235	47.267	39.228	46.623	36.588	45.407	39.824	45.576	44.977	46.263	42.664	50.752	55.968
59.803	73.135	90.945	57.94	88.027	62.312	117.97	54.413	75.445	47.049	65.648	55.45	73.642	69.445	57.634	71.705	68.46	85.198
53.527	42.459	49.273	38.712	46.127	38.616	51.711	30.987	43.488	27.315	46.486	32.531	41.735	35.481	37.025	39.916	41.299	51.979
52.003	42.459	49.273	45.469	46.127	32.632	37.011	28.413	39.521	27.315	43.1	32.531	36.555	35.481	38.565	39.916	41.299	50.52
60.059	54.531	40.188	51.388	48.864	56.934	47.891	60.993	58.314	61.509	52.879	38.481	46.982	45.87	50.96	53.634	56.781	69.283
158.47	108.9	139.04	73.667	139.74	71.783	118.52	85.72	96.103	74.14	111.72	119.89	113.13	122.02	103.08	117.38	101.16	107.55
131.13	107.01	156.65	93.877	168.76	87.043	133.24	155.21	96.039	89.03	121.32	148.01	97.638	172.74	137.32	173.29	85.127	133.56
87.471	79.102	113.89	93.877	89.776	93.608	77.011	85.587	87.344	89.03	78.122	120.1	71.857	79.244	82.454	74.176	79.472	66.254
143.93	87.495	88.828	113.55	94.46	81.926	86.465	82.385	93.839	78.567	82.588	112.98	85.495	89.451	80.502	84.926	71.913	90.525
95.023	57.209	84.627	83.254	63.671	76.087	56.709	71.615	62.802	73.746	63.669	79.649	49.814	66.826	48.791	63.292	59.614	48.869
44.114	45.782	36.404	100.62	52.067	76.087	49.056	102.76	77.319	95.017	51.469	26.723	53.116	27.693	48.265	33.126	53.326	35.861
87.374	89.498	110.34	100.62	100.33	95.293	92.037	93.55	95.678	77.495	73.419	77.993	79.961	69.423	80.15	69.353	83.077	71.648
87.374	157.05	127.46	176.25	167.11	171.71	143.83	177.26	157	169.39	143.95	124.98	160.34	130.19	150.09	122.68	155.85	131.65
88.421	116.37	137.79	121	141.46	117.34	129.15	116.84	131.54	139.59	104.48	136.08	92.902	146.21	114.04	131.28	97.572	132.31
137.1	116.37	137.79	110.65	132.96	106.03	129.15	113.82	127.44	124.38	104.48	132.35	92.902	119.86	87.518	114.63	97.572	136.15
177.99	88.031	86.142	96.884	105.13	98.762	89.236	104.33	106.13	117.52	99.077	78.708	87.222	70.036	101.15	70.048	94.836	88.031
89.602	82.719	71.47	113.34	93.885	113.72	85.632	202.11	117.73	94.285	85.178	78.708	85.699	74.623	102.67	74.275	116.92	69.322
82.136	101.72	94.435	123.38	96.928	144.26	130.49	116.1	138.61	92.318	84.46	68.878	90.668	66.776	88.258	67.367	106.27	104.81
65.888	101.72	99.289	114.89	90.841	110.89	104.02	104.05	116.89	77.103	84.46	80.23	85.897	86.351	76.136	73.16	88.079	92.853
104.73	76.691	76.235	76.16	75.667	79.746	74.746	81.308	76.753	82.768	65.126	51.82	66.152	76.177	76.312	73.16	134.41	64.234
72.717	67.434	80.903	123.93	81.812	97.033	96.173	81.578	90.571	78.046	65.126	88.825	57.324	82.496	76.312	81.783	136.87	65.137
86.771	123.05	110.25	90.584	131.29	106.76	120.97	97.394	135.82	88.977	119.8	96.07	132.39	102.94	147.03	110.28	143.32	109.65
57.614	74.47	66.148	120.16	69.522	112.74	79.002	90.134	77.174	99.846	62.736	62.805	74.227	46.07	77.904	51.096	112.31	77.314
114.47	107.01	93.293	103.46	93.598	110.36	86.796	142.64	91.443	103.21	110.94	105.49	107.77	102.89	111.26	105.68	107.94	101.19
138.01	107.01	111.44	103.46	111.12	105.17	112.1	99.889	91.732	104.28	116.54	105.49	120.65	93.563	135.61	90.754	130.2	103.42
145.94	89.89	126.43	114.8	119.3	87.102	110.49	84.695	96.847	101.27	112.87	124.48	92.127	121.12	79.12	119.18	74.215	111.13
112.05	121.29	132.85	145.33	123.89	116.18	138.22	127.18	157.02	122.56	100.47	135.43	103.69	133.56	89.398	132.64	75.418	124.85
114.35	104.62	125.98	91.071	123.65	80.05	99.866	87.295	88.454	92.172	103.32	143.63	90.834	167.05	81.27	164.39	79.696	127.86
43.488	60.208	68.436	87.831	89.898	87.942	77.232	92.806	80.861	104.41	48.995	59.966	50.064	54.914	55.044	56.531	71.605	50.578
64.436	80.306	62.724	112.96	93.814	103.6	100.2	124.64	92.798	137.3	57.457	42.053	91.267	44.291	111.27	57.737	109.57	60.38
75.587	62.949	45.251	84.879	58.926	89.373	51.256	94.389	62.482	105.76	57.645	48.226	72.979	37.259	79.326	48.578	94.379	55.077
76.706	140.8	100.13	153.27	118.1	156.43	122.02	142.49	137.81	152.1	130.14	101.03	136.57	89.337	133.83	89.109	142.8	109.21
158.55	123.71	122.1	150.12	119.33	144.46	99.435	178.31	107.53	152.37	137.21	127.95	138.32	136.36	154.45	133.18	157.58	116.84
117.98	99.187	101.91	108.33	95.009	99.461	91.724	165.27	96.155	136.54	107.91	126.42	98.704	136.36	109.16	132.27	93.054	96.241
84.909	62.523	46.747	93.728	50.448	94.097	60.766	146.48	61.033	117.44	73.012	29.368	71.264	24.996	67.106	30.359	64.414	61.369
126.63	86.719	77.526	113.34	87.95	117.1	93.448	117.03	96.933	111.37	83.106	65.537	94.814	52.72	92.715	65.242	100.16	82.015
94.119	86.719	89.796	113.94	99.08	113.72	97.983	114.96	99.201	110.07	85.23	69.352	82.453	73.615	85.765	78.471	91.428	91.8
90.172	113.79	132.02	113.94	126.44	100.57	110.7	85.772	115.65	85.024	101.05	128.57	97.057	115.06	94.973	96.328	85.878	109.19
98.616	82.299	74.975	101.41	85.395	108.35	86.844	110.99	91.84	120.46	84.188	87.781	90.305	102.66	104.28	75.407	95.634	82.678
132.71	128.41	137.71	140.27	157.03	130.18	149.77	158.26	146.2	120.46	129.61	97.098	148.39	102.66	149.29	109.59	130.24	125.45
103.85	128.41	126.91	103.62	122.41	102.26	109.22	104.27	111.85	111.76	118.95	177.29	123.14	173.38	125.28	169.84	115.59	116.21
119.24	91.399	71.127	83.648	80.08	83.141	81.18	104.77	77.955	115.63	100.67	91.684	89.63	79.007	95.066	101.13	91.189	83.864
191.32	174.72	229.8	134.14	218.41	152.81	188.21	135.32	155.66	137.64	196.27	240.9	207.11	196.77	225.81	198.46	215.38	159.05
88.74	86.591	78.775	127.18	89.674	105.05	79.721	112.15	101.74	104.95	89.347	67.373	93.236	84.321	98.194	80.977	96.446	78.603
80.617	89.648	91.517	81.7	75.117	94.496	81.068	116.57	78.736	126.97	87.759	105.02	93.236	104.2	102.58	94.408	106.07	99.982
153.18	100.35	131.12	109.67	134.97	110.05	124.07	99.185	116.59	94.881	87.262	136.26	74.598	111.11	61.292	109.88	70.352	95.727
110.28	113.79	110.51	113.03	105.61	125.46	101.49	134.22	119.3	136.04	98.583	152.36	101.6	149.36	102.8	128.06	114.71	102.95
71.255	42.154	40.514	62.404	39.178	55.688	34.57	61.067	45.307	64.33	51.239	49.64	51.675	50.332	67.096	47.854	51.028	47.347
150.26	80.792	99.515	86.296	92.719	90.145	81.988	95.284	98.87	99.012	90.081	83.362	95.585	68.053	93.866	73.844	91.938	86.677
111.34	77.937	99.515	100.4	72.227	103.14	81.988	84.965	67.512	86.56	67.736	83.362	74.045	65.598	65.408	59.726	75.567	68.294
79.434	65.429	56.287	122.08	59.338	106.73	64.819	124.03	71.056	117	66.126	54.579	67.679	45.718	76.176	49.275	83.185	65.945
105.1	69.49	63.626	81.414	67.616	73.785	66.771	77.446	67.231	79.19	70.446	72.735	68.994	80.602	75.414	75.035	69.322	66.861
171.1	94.331	117.76	60.208	94.712	74.278	88.162	92.473	99.36	60.337	138.67	161.02	91.859	179.17	70.289	166.07	57.669	146.57
192.4	162.63	171.93	149.46	129.15	156.22	139.26	143.28	165.8	157.31	162.82	193.65	153.92	182.07	146.93	178.6	135.03	161.34
167	119.54	108.4	132.22	143.2	133.78	136.2	149.31	123.18	161.97	118.99	122.63	129.5	93.942	135.22	118.97	137.86	113.38
138.63	103.42	99.691	119.37	95.712	122.74	95.434	123.59	107.94	130.36	107.75	100.91	90.33	117.39	95.77	119.09	93.051	110.31
138.63	60.568	42.633	65.816	62.767	71.9	68.695	83.748	55.834	79.848	63.761	40.321	56.902	62.151	65.428	72.957	56.393	59.462
110.35	67.259	51.79	97.034	59.216	85.709	89.004	100.57	79.742	117.71	60.28	69.386	78.113	61.396	88.869	60.548	99.747	69.13
71.206	85.355	99.33	77.955	84.621	86.323	89.004	91.353	80.243	95.139	75.292	107.56	83.827	81.58	97.384	87.834	108.82	74.115
64.568	86.852	98.541	64.058	66.806	90.846	87.251	82.195	76.553	101.27	85.868	89.973	101.33	53.42	99.432	63.052	102.13	72.734
70.912	95.045	85.396	101.48	102.54	107.17	93.427	106.21	94.891	115.66	90.322	87.109	108.53	72.763	115.1	83.052	114.9	96.34
54.076	56.911	72.414	82.698	71.747	67.595	71.903	74.238	69.308	84.974	43.591	62.087	53.996	56.535	62.245	51.706	73.806	55.857
54.121	68.674	58.558	84.774	67.377	71.57	72.381	96.228	79.846	84.974	54.614	57.79	65.655	43.693	64.269	50.961	74.918	61.042
81.272	59.859	81.948	59.467	79.506	61.344	73.235	78.746	75.392	52.933	44.871	83.334	47.116	67.712	48.351	57.875	51.959	61.676
77.338	62.827	74.885	81.842	70.373	74.537	73.235	78.125	68.409	84.465	54.963	72.033	58.056	63.56	58.57	57.215	70.597	61.676
94.457	59.805	86.018	62.918	81.839	55.374	62.922	62.931	51.296	49.845	58.413	85.614	57.729	61.154	58.308	59.586	52.09	55.111
94.457	54.815	77.712	72.168	60.821	63.545	51.179	64.695	54.394	74.106	64.825	69.143	64.912	64.896	66.934	69.853	57.377	66.954
101.02	44.945	58.256	37.519	46.524	38.234	33.419	33.745	49.289	32.493	55.119	69.143	46.452	64.896	47.66	59.713	55.647	60.141
43.916	25.137	35.275	19.842	21.994	23.973	26.482	26.161	21.045	32.324	34.546	47.868	29.323	45.887	27.952	36.787	31.464	31.302
86.041	87.994	106.67	60.612	102.1	54.987	110.73	38.812	90.984	53.711	100.1	114.91	80.234	111.14	76.263	113.24	64.66	100.51
75.68	85.619	113.33	73.537	98.266	80.861	86.664	63.494	83.211	58.837	88.81	98.468	96.741	100.6	64.142	98.19	58.754	77.373
42.801	51.809	61.474	43.572	47.548	52.086	48.736	51.906	48.305	50.332	45.979	60.079	53.414	50.278	52.634	47.951	50.267	51.234
62.708	59.798	71.437	56.277	62.328	55.98	54.594	51.906	56.637	50.332	63.058	69.873	63.536	56.028	61.061	62.045	64.074	64.324
32.048	42.878	44.136	42.802	50.559	39.736	42.285	33.59	45.454	30.631	56.857	34.927	49.31	48.162	54.637	57.659	44.644	52.125
44.82	56.186	51.406	51.458	56.21	52.014	48.846	44.385	53.459	38.937	59.05	42.725	63.928	52.786	49.921	60.637	78.881	61.668
92.629	68.334	73.985	74.865	66.059	86.949	70.974	78.922	70.974	65.806	74.035	60.129	67.801	77.578	78.487	79.827	65.526	78.426
128.97	68.334	118.47	53.72	83.442	61.759	80.782	59.194	57.352	66.896	75.214	111.43	65.583	94.348	104.93	94.854	68.697	80.185
106.02	145.82	134.03	133.78	157.98	127.24	139.55	115.46	140.11	105.35	124.04	118.88	125.1	113.78	128.88	110.67	119.32	135.14
115.52	68.87	74.288	129.02	101.37	101.03	85.269	98.326	105.98	87.315	90.808	87.329	79.753	75.746	84.897	74.555	94.435	80.137
117.38	94.574	98.44	118.52	104.45	109.72	101.91	93.908	114.45	92.807	102.72	94.468	84.714	105.14	70.459	107.77	85.652	110.86
69.84	90.594	47.256	114.23	67.977	111.12	101.91	101.9	113.06	118.29	78.359	46.106	85.331	58.862	100.27	70.929	127.88	69.14
93.176	86.139	53.655	115.57	67.977	88.656	82.595	114.5	95.607	97.679	85.613	55.362	89.089	67.406	82.536	79.86	81.125	80.338
67.854	81.754	86.471	123.97	91.081	107.54	77.226	98.067	101.83	103.93	103.47	104.53	94.516	103.75	97.86	103.43	81.125	86.935
92.974	81.568	112.93	101.9	114.65	84.132	93.742	66.997	88.534	57.035	90.324	123.06	85.239	107.81	98.145	103.43	80.873	81.908
109.94	206.47	217.67	230.28	207.46	199.34	217.53	182.86	213.46	159.41	182.97	215.14	151.23	204.93	128.45	206.74	113.81	206.01
129.69	79.797	85.636	140.29	86.243	128.38	110.58	136.61	109.29	110.22	84.803	121.2	67.9	89.679	64.499	72.343	78.794	104.1
121.13	152.91	155.13	157.33	145.64	155.28	154.46	204.48	142.11	144.99	126.61	143.12	136.65	150.76	138.43	148.31	149.99	126.99
87.575	74.755	73.96	91.706	70.767	66.383	56.839	70.532	57.999	88.224	72.695	101.02	68.976	100.26	62.001	92.799	69.348	69.625
87.575	153.05	135.02	128.28	131.05	133.43	123.16	123.31	150.07	134.61	144.63	130.65	152.56	128.51	140.99	137.52	148.51	132.18
87.254	148.53	128.59	141.37	129.25	134.01	109.92	152.34	116.23	155.92	141.59	121.32	167.97	122.04	167.45	144.46	154.64	134.99
136.36	123.53	128.95	124.45	119.12	114.37	133.74	105.13	105.85	113.33	135.39	176.58	127.41	179.01	107.45	170.46	114.65	138.45
96.43	92.007	93.267	128.9	96.641	107.3	104.9	97.641	107.21	100.59	85.997	99.245	87.826	102.78	70.933	98.69	78.683	95.437
105.25	139.85	119.2	122.46	127.1	125.9	127.29	134.37	125.53	139.68	120.11	140.15	135	133.25	151.84	127.79	142.12	121.63
161.49	120.83	137.9	126.46	149.22	118.21	131.09	129.95	126.16	155.49	103.13	129.89	96.552	118.38	106.43	107.95	147.96	107.93
165.67	120.83	136.77	152.15	130.86	144.06	141.55	182.01	138.14	179.85	113.48	167.2	102.01	148.04	107.27	134.49	127.8	122.37
122.95	109.14	100.53	152.15	108.27	144.06	112.62	147.29	105.13	131.8	97.451	121.67	107.36	104.23	119.65	102.45	118.71	89.985
166.23	108.73	137.18	103.16	146.99	100.38	112.62	93.848	101.72	91.645	97.797	148.36	98.476	122.76	98.811	113.06	98.441	101.32
90.002	72.639	78.557	90.519	58.449	67.102	75.472	63.567	63.38	65.407	83.341	80.874	84.856	63.946	79.341	62.07	74.309	72.298
65.125	46.359	58.436	57.466	53.301	49.889	64.535	51.697	63.984	58.394	48.79	70.992	42.878	50.046	42.984	47.382	52.874	52.643
76.162	71.612	69.796	76.586	88.374	77.957	86.702	82.536	79.178	73.858	65.177	62.405	58.233	49.714	57.636	51.423	62.921	62.807
64.465	135.42	98.748	107.77	153.32	133.3	156.77	113.31	156.83	114.54	149.78	84.241	135.34	122.77	127.84	122.83	143.29	163.46
160.57	104.52	156.47	107.77	137.67	84.903	109.66	106.58	97.423	114.54	103.71	176.4	84.438	164.37	75.2	152.39	114.07	113.54
180.05	122.51	149.61	112.68	127.14	101.07	105.95	106.58	118.8	136.32	134.18	177.55	119.2	180.67	103.53	176.03	96.332	123.92
227.15	106.98	131.87	91.823	126.61	87.699	97.275	91.718	78.826	103.21	134.74	164.68	102.38	130.72	99.127	127.41	101.04	118.82
132.6	85.822	85.198	82.494	95.851	73.998	77.348	72.219	80.198	78.873	92.211	109.54	87.398	106.26	87.968	103.98	96.168	92.891
88.457	52.585	53.057	55.065	64.425	71.772	55.236	69.33	63.648	105.56	50.059	62.047	50.676	59.464	56.24	72.596	72.346	56.091
140.41	66.559	76.11	64.933	67.223	68.823	70.321	78.96	62.344	94.089	63.735	96.213	63.81	64.014	73.441	60.498	92	62.138
77.318	52.514	60.304	52.481	57.749	63.756	49.034	57.699	47.259	69.275	43.941	46.605	48.252	42.171	54.771	40.464	64.549	45.911
49.031	58.632	34.332	80.107	50.045	79.25	41.737	99.173	61.014	110.01	57.296	57.319	64.905	65.542	72.401	68.612	131.1	69.569
55.756	66.912	79.247	87.188	74.307	82.038	68.433	95.968	74.309	118.3	59.992	77.498	71.614	63.5	76.038	60.391	104.64	60.227
161.72	139.9	130.15	113.55	155.24	124.67	146	113.07	131.96	101.21	143.1	179.63	139.29	172.74	124.74	166.5	131.09	138.53
175.88	139.9	130.15	159.27	155.24	132.36	146	146.81	131.96	137.7	138.5	149.07	123.4	172.74	116.85	166.5	115.71	138.53
200.68	108.18	107.07	141.7	105.97	128.27	105.51	136.81	115.45	140.15	120.48	100.1	117.08	110.61	119.9	115.9	109.17	113.95
200.68	110.64	110.14	142.48	106.7	129.32	106.08	155.42	122.77	168.15	122.86	141.13	117.08	110.99	113.61	125.49	122.25	124.46
215.16	217.5	194.98	184.4	186.51	205.42	181.97	190.27	199.16	207.34	212.66	198.02	204.67	204.25	198.42	213.96	198.13	201.21
172.8	196.67	143.66	163.02	173.65	171.57	169.84	169.5	186.76	190.69	187.98	153.99	224.43	181.98	216.22	185.83	228.84	181.97
139.47	139.48	124.24	113.63	127.82	136.73	133.41	139.01	129.75	172.34	155.13	153.99	140.81	146.59	139.24	165.29	168.01	152.56
105.61	165.26	124.24	113.87	127.82	116.05	135.77	88.933	157.26	112.85	154.5	181.8	150.16	172.4	119.33	160.32	123.34	143.79
88.02	98.115	109.45	116.13	89.806	96.166	85.802	85.382	83.27	88.542	100.14	116.67	103.92	106.92	91.986	105.49	92.307	103.97
88.02	79.968	72.882	86.32	75.284	88.327	68.597	109.82	109.5	109.28	69.358	92.453	79.453	78.896	74.766	80.613	74.254	61.13
62.434	79.47	58.406	98.806	56.429	102.31	67.171	156.77	86.363	78.002	91.55	80.038	67.113	81.658	60.736	77.526	70.408	85.394
67.781	72.518	112.07	98.806	75.47	101.64	82.638	127.48	86.363	78.002	57.799	67.325	67.113	67.316	60.736	61.826	70.408	73.469
110.22	91.585	115.88	63.681	122.71	67.576	104.34	75.167	101.26	57.118	101.98	118.28	85.545	129.27	73.936	129.38	72.278	102.05
107.91	73.338	100.67	65.003	87.262	51.294	69.12	55.932	66.59	64.088	74.101	126.38	55.723	108.43	69.924	101.79	57.401	81.865
60.894	36.04	46.09	30.636	33.525	22.128	39.045	23.301	21.379	19.991	40.74	78.917	43.201	59.629	50.368	44.368	47.568	48.031
125.64	82.869	93.972	57.809	95.698	55.297	77.862	39.038	68.85	40.16	107.06	91.942	77.255	96.989	68.942	111.45	64.763	93.26
53.921	31.696	47.486	24.334	38.1	20.214	24.239	18.312	25.762	15.723	55.49	75.329	31.657	53.798	31.759	52.934	29.259	37.767
31.843	16.447	19.022	11.866	15.917	14.742	13.799	11.435	17.126	8.6782	26.054	46.21	22.605	33.627	25.734	27.88	18.51	29.915
19.988	15.362	17.488	9.8022	20.74	13.022	12.582	12.056	14.464	10.859	15.426	23.884	15.535	20.263	27.133	19.23	19.313	30.386
21.184	13.678	14.271	11.979	13.378	11.462	11.502	14.504	11.827	8.9587	16.501	15.348	14.464	17.414	13.707	16.893	13.367	18.278
21.184	14.35	15.963	13.682	13.627	13.218	11.502	13.222	10.676	8.1325	16.253	15.52	15.635	14.3	17.542	15.605	9.2257	15.755
27.838	17.784	27.033	21.368	20.488	18.377	21.96	13.222	19.545	8.1325	21.558	26.993	16.421	16.786	17.542	17.607	18.053	24.332
25.422	13.153	21.394	10.644	14.419	13.42	13.394	8.1516	14.83	7.8007	14.062	17.68	12.038	12.531	19.079	14.402	42.582	19.4
16.256	14.271	14.563	9.0354	12.895	11.801	11.797	10.511	12.018	11.08	16.441	13.298	14.69	15.531	21.158	16.043	13.719	16.685
22.841	13.388	17.206	10.257	14.15	10.531	14.095	8.5848	13.405	9.5998	12.79	10.913	14.75	15.531	12.352	15.52	11.655	17.123
10.473	8.9154	11.638	7.4517	11.586	12.374	8.5866	6.9841	8.6676	7.0618	12.723	10.306	8.7427	12.977	8.6482	10.113	12.397	12.399
13.588	8.3957	10.825	7.5603	11.002	10.542	9.2955	6.0318	13.421	5.7118	12.723	11.761	8.8788	10.116	8.1319	10.45	9.7801	8.7952
4.8073	8.7522	10.825	10.056	9.9872	10.585	11.099	6.6499	15.35	5.5971	10.729	12.741	10.129	14.029	8.6912	13.743	10.358	11.397
8.2397	10.11	9.863	10.148	10.687	9.5687	23.678	10.125	12.872	9.7073	11.959	8.2647	11.399	16.286	10.231	17.051	12.552	16.456
12.26	21.096	25.181	19.442	27.794	16.83	31.902	37.379	24.721	15.983	26.724	18.141	22.191	25.211	16.235	25.7	15.898	35.361
24.234	35.78	39.148	29.272	50.655	28.723	33.64	30.241	35.444	22.404	20.666	30.579	31.336	42.869	31.225	26.011	25.869	33.095
56.039	62.987	56.357	67.995	66.966	58.681	61.46	39.345	71.792	40.38	56.824	40.734	42.185	52.247	62.737	54.938	35.868	54.703
31.179	17.766	18.832	23.024	24.447	16.636	19.421	16.268	20.154	12.519	21.799	12.283	18.895	30.72	17.316	19.648	18.273	23.123
29.487	33.735	32.575	52.715	54.876	39.377	32.692	28.245	42.38	29.441	30.581	25.863	30.661	20.171	33.171	37.866	34.266	42.096
28.479	28.309	32.317	25.631	25.395	39.377	22.656	24.2	33.279	29.441	29.007	25.863	28.459	19.259	31.537	29.676	25.604	40.011
42.135	37.179	43.705	54.262	37.159	46.464	39.73	29.002	47.514	28.461	51.991	74.343	39.119	57.076	41.581	61.14	32.538	50.865
48.742	48.725	43.705	49.794	36.92	56.364	39.074	63.137	43.188	64.369	50.198	42.168	58.745	31.446	66.143	36.057	74.222	33.843
63.841	58.104	45.238	68.144	47.048	63.774	49.029	74.514	58.184	80.75	50.198	33.39	47.656	30.987	46.333	35.627	50.689	46.911
117.16	72.086	62.571	86.201	76.985	68.475	80.675	74.514	84.066	70.833	93.194	58.401	74	67.044	69.121	72.763	68.443	73.928
107.78	72.949	86.644	87.259	86.285	81.386	78.867	90.31	91.169	100.11	96.331	102.31	95.378	87.952	92.794	88.729	96.217	78.184
94.72	69.671	56.611	96.708	54.317	86.601	86.058	104.03	72.928	115.49	58.474	52.852	75.437	59.823	80.266	61.181	81.083	58.109
126.65	60.342	56.611	76.751	65.143	81.817	57.282	86.095	77.005	87.165	67.968	53.905	61.941	59.823	64.638	60.044	71.029	59.607
30.771	30.885	39.354	38.326	36.893	41.809	32.915	43.73	36.371	49.452	37.876	34.773	31.249	43.164	64.638	48.587	39.458	47.158
71.826	51.547	51.837	39.953	43.35	30.524	37.99	23.948	46.597	23.788	71.193	63.05	64.94	63.467	60.891	67.102	54.411	58.827
64.143	52.936	62.413	42.002	47.398	33.008	33.819	50.592	38.712	23.599	61.78	43.674	49.246	65.569	48.869	63.375	38.758	60.876
26.473	22.726	27.828	24.917	25.066	25.371	31.794	24.098	30.28	19.366	37.64	16.723	33.27	24.434	32.963	26.284	28.906	23.725
20.657	22.127	21.576	17.811	37.286	19.931	20.764	18.863	35.508	19.366	32.174	16.948	34.367	18.57	29.371	19.85	29.205	23.191
18.143	14.648	16.838	10.95	17.276	16.013	18.213	9.846	21.579	7.9946	26.798	10.369	15.97	14.528	18.719	20.999	11.295	22.447
16.603	12.449	12.219	10.95	17.276	12.352	15.362	10.602	18.766	10.898	16.64	10.369	16.584	16.068	18.852	21.842	14.628	16.046
16.649	24.055	18.815	26.73	24.339	26.265	20.861	18.652	20.435	18.424	26.839	17.573	29.217	23.008	23.896	25.021	22.978	25.885
16.294	17.805	19.225	14.406	31.99	15.31	15.797	16.395	20.696	15.186	18.2	15.969	25.573	13.205	18.554	14.125	18.452	15.255
16.294	30.525	29.597	29.904	33.121	27.72	32.516	37.222	27.238	19.394	23.747	20.239	28.106	31.186	20.345	16.58	22.764	27.132
25.064	19.906	38.191	20.066	34.905	17.366	27.347	20.822	25.543	16.821	19.492	16.104	30.688	25.746	19.718	16.58	17.994	21.379
20.744	18.175	17.526	15.587	17.936	17.366	21.185	16.343	20.42	13.574	18.309	15.43	21.412	11.959	19.403	15.725	18.453	17.76
44.76	32.333	42.951	23.589	30.361	25.634	33.91	21.788	31.114	17.446	44.658	37.932	31.389	42.189	29.465	42.122	25.524	45.192
25.032	26.78	42.951	30.319	32.883	17.64	25.131	21.444	20.638	18.693	33.069	36.175	26.241	40.647	25.185	45.409	27.598	34.055
46.276	33.121	34.138	31.317	25.164	36.013	30.048	27.988	26.657	25.672	42.913	29.877	46.049	34.433	43.297	32.424	48.838	41.156
46.276	45.231	51.952	29.742	44.527	36.013	41.558	33.423	40.157	33.223	53.202	57.509	50.897	47.025	84.947	44.036	53.429	53.749
39.719	60.245	83.782	55.623	52.545	47.941	46.07	50.144	54.331	49.737	66.179	48.03	66.197	46.426	57.742	45.056	43.714	50.392
90.621	73.192	88.55	86.83	73.904	83.747	66.724	88.827	72.212	82.63	66.865	55.811	75.183	64.499	66.591	68.057	70.981	70.495
53.719	55.637	38.041	59.019	47.703	58.792	48.474	57.824	51.786	68.29	62.432	40.516	72.671	36.563	75.725	46.72	73.169	63.292
30.511	41.04	28.582	53.118	47.341	49.169	52.37	48.834	48.105	49.54	42.448	41.453	50.65	21.106	45.544	27.314	51.168	44.344
42.659	73.716	54.187	132.12	62.053	108.98	69.308	188.41	77.864	106.11	68.226	57.106	73.897	41.127	74.661	50.065	79.988	68.879
55.06	60.803	44.906	85.378	51.412	74.084	50.374	67.665	73.247	64.066	63.165	36.186	56.751	39.36	61.952	50.042	62.947	62.318
54.493	54.196	50.091	54.016	37.261	53.369	50.374	54.697	51.212	60.866	57.61	43.536	54.614	43.608	47.074	48.265	53.481	60.581
59.665	53.785	47.673	78.454	49.738	79.77	44.407	87.362	63.756	88.561	52.025	46.004	62.302	51.061	64.688	41.269	71.541	37.777
68.289	73.67	53.449	72.815	65.917	66.319	81.28	71.957	72.48	71.308	60.669	55.211	65.741	62.308	76.683	58.563	75.827	59.405
62.174	62.365	53.298	69.001	60.828	66.319	82.706	77.579	71.113	71.308	57.88	55.211	59.261	62.308	72.323	58.563	61.913	56.84
40.542	54.74	53.581	50.739	62.515	48.435	53.043	58.153	61.247	54.035	48.522	61.058	49.444	48.47	42.363	50.637	44.484	48.983
106.35	116.11	107.55	119.81	117.35	112.38	118.51	132.58	117.33	99.075	130.78	91.378	124.58	91.818	100.55	103.82	85.343	118.94
116.08	118.34	138.12	82.884	144.43	88.529	125.26	62.878	107.57	54.823	111.27	142.12	99.721	134.09	84.044	145.4	77.724	118.94
86.31	107.02	98.694	91.67	103.69	114.37	107.83	123.86	104.92	116.13	101.01	82.964	103.63	79.271	106.49	80.594	94.081	105.33
32.784	38.269	35.843	39.446	40.788	37.155	33.373	38.791	40.048	31.987	31.872	33.899	42.013	26.453	45.439	30.878	42.007	53.164
62.439	74.955	67.523	66.607	76.235	55.435	69.856	58.813	66.685	45.81	63.947	64.803	75.253	55.397	66.554	60.297	66.665	82.165
44.461	82.07	76.495	66.607	63.378	72.848	83.04	81.643	82.087	56.277	74.416	66.892	72.646	68.404	60.59	64.15	70.814	92.008
44.461	59.203	59.537	58.472	70.33	61.284	60.198	53.119	68.801	53.426	55.337	45.349	54.342	47.014	57.24	55.396	55.224	62.741
26.789	54.897	47.397	53.461	51.46	56.879	52.227	44.894	46.971	37.31	51.035	38.669	49.306	38.972	49.432	46.198	49.707	52.154
57.592	71.521	79.324	78.859	53.993	80.512	57.847	69.623	72.455	63.909	66.009	48.963	74.478	56.986	65.956	65.216	72.929	69.737
105.24	82.4	83.719	75.173	85.174	76.759	97.623	64.386	86.138	62.06	85.015	70.758	77.369	81.806	70.642	83.6	72.929	96.011
91.151	106.99	88.199	113.62	89.502	109.44	91.983	115.57	99.72	111.45	111.65	89.597	109.11	100.14	113.72	108.04	110.26	107.44
77.111	69.324	57.254	87.043	64.175	75.954	65.679	58.575	76.099	57.547	74.459	59.303	61.553	64.882	65.483	62.533	47.936	71.116
62.618	62.788	57.3	99.005	55.316	74.577	63.632	88.081	80.833	87.869	51.236	56.516	61.659	42.934	60.049	44.066	63.38	53.235
62.618	72.208	54.745	84.633	64.077	74.577	71.729	69.968	81.457	70.769	72.226	58.071	73.859	63.893	70.135	67.441	86.848	68.362
61.77	77.78	77.752	74.907	78.195	85.878	75.617	86.952	80.621	101.43	83.974	61.059	87.211	52.838	95.441	62.738	107.4	69.622
75.02	59.164	52.211	83.894	60.971	70.764	56.677	75.548	64.492	79.647	66.239	56.541	73.431	51.644	74.038	57.099	78.814	58.301
60.475	48.494	49.001	84.492	56.806	68.103	71.436	82.03	65.852	89.415	41.886	57.945	41.87	43.105	43.55	41.882	52.208	43.45
99.672	124.41	108.1	153.09	145.46	128.12	154.79	115.72	155.96	117.71	138.76	96.04	123.45	113.98	121.42	142.64	103.15	130.63
110.67	120.82	98.285	185.87	104.69	159.56	112.15	167.92	140.95	160.39	103.49	120.93	95.842	163.13	93.432	122.46	105.68	105.11
70.824	175.16	143.12	187.71	155.79	196.5	178.93	209.48	167.36	211.55	156.44	117.13	194.83	178.02	201.6	138.61	203.06	149.46
64.079	56.563	55.893	78.312	67.864	82.584	71.029	77.306	124.76	80.084	49.942	54.736	54.588	37.176	71.448	37.572	52.13	46.257
82.033	68.422	59.887	91.469	79.921	83.184	73.955	91.733	80.502	88.447	61.431	38.56	66.243	41.413	69.317	49.974	65.211	68.139
97.75	82.936	80.812	103.34	83.01	99.054	74.841	99.473	80.502	101.34	91.908	76.588	84.662	85.482	77.407	85.95	84.24	84.636
86.763	93.923	105.84	74.857	95.819	76.269	87.855	87.99	89.802	82.003	91.908	110.36	90.402	98.695	102.73	104.37	86.876	99.163
63.703	78.749	101.75	109.5	101.36	68.606	76.912	72.004	96.838	74.87	82.732	88.823	59.961	83.496	72.857	83.682	48.502	77.805
73.404	48.46	68.938	51.24	62.537	43.119	49.035	93.305	41.936	46.484	57.237	80.867	49.619	66.771	43.119	59.832	63.56	54.534
52.323	50.266	59.749	87.77	56.474	64.962	46.843	74.248	79.657	83.332	57.237	45.886	47.556	40.148	45.703	40.13	46.107	46.685
53.416	83.564	59.749	119.94	77.871	116.85	78.27	102.81	124	102.2	69.33	41.922	89.733	40.148	89.139	47.847	100.83	69.452
184.35	142.9	168.22	141.53	162.07	128.25	150.66	112.02	144.51	97.151	150.63	154.46	129.32	149.35	134.26	159.13	102.92	159.52
153.29	97.397	120.9	99.323	110.61	111.24	111.22	113.52	95.017	132.93	131.3	175.51	112.48	147.88	86.908	150.45	94.648	123.56
156.7	84.508	121.17	94.052	101.51	96.947	84.701	87.038	102.16	93.326	84.508	146.81	86.368	119.31	91.822	112.52	79.191	81.985
129.83	110.98	119.99	129.77	142.15	117.62	139.01	127.77	123.8	107.26	118.88	146.81	104.54	119.31	110.64	101.8	106.52	105.33
117.91	74.331	72.043	107.19	83.526	86.129	114.8	99.005	91.315	105.22	82.312	66.45	73.947	81.592	74.509	90.127	78.017	83.257
117.91	94.416	101.12	112.67	120.03	113.48	120.35	104.71	98.666	92.897	87.147	102.43	90.437	97.29	106.23	103.27	108.35	87.177
57.792	74.297	58.776	108.01	52.264	88.07	83.797	103.4	82.971	92.71	98.704	56.795	83.057	37.91	81.752	52.646	82.488	66.608
54.274	67.92	71.371	79.559	73.135	74.789	65.154	67.778	61.803	89.305	79.918	86.056	76.751	70.175	84.933	77.736	69.14	69.6
69.617	74.021	71.371	74.772	73.135	74.789	67.041	78.236	66.344	76.042	72.554	102.26	73.603	85.557	71.19	77.456	77.804	69.6
71.816	67.693	59.087	75.565	56.455	59.426	50.554	63.25	58.27	64.196	72.554	52.108	66.031	48.539	60.257	55.512	64.065	67.154
96.039	68.197	71.988	82.425	69.98	61.534	61.223	69.72	71.848	51.557	63.716	106.21	49.02	89.3	41.134	79.476	41.037	63.028
61.318	40.125	54.592	44.04	56.639	38.406	64.608	38.946	50.889	39.195	31.318	59.567	25.965	60.964	25.809	55.848	30.351	35.547
92.917	45.103	36.297	32.136	32.39	39.296	56.324	36.072	37.357	31.836	64.57	47.468	68.673	49.004	75.76	59.875	46.786	59.156
73.916	33.14	39.496	32.95	53.52	31.935	32.719	33.077	35.766	24.3	43.394	51.282	38.149	45.468	37.365	36.429	23.866	44.871
56.7	16.004	22.669	13.984	32.155	13.699	15.735	11.043	14.971	12.887	22.396	25.12	21.873	23.833	23.096	24.744	21.438	19.285
35.463	30.793	30.088	28.102	43.793	29.92	33.441	31.092	29.308	30.568	35.203	33.031	34.852	24.677	34.596	27.813	38.207	41.91
38.887	36.082	36.028	30.481	35.133	32.558	39.4	31.092	29.308	30.039	56.666	34.297	47.208	44.094	51.154	45.27	39.069	45.562
41.433	28.393	21.169	20.74	17.997	24.137	25.768	20.329	23.634	15.687	59.849	16.662	47.494	33.425	42.567	43.583	34.157	49.883
40.082	14.605	8.1509	13.858	10.385	12.097	13.156	14.847	15.353	11.247	24.006	11.787	20.913	13.491	21.214	22.462	17.961	27.827
21.09	12.776	14.282	18.579	15.401	13.274	10.413	11.395	16.285	12.482	18.006	10.904	16.815	12.159	13.522	14.104	17.422	11.941
21.193	17.133	16.119	14.807	24.275	13.323	19.864	12.844	16.452	13.324	21.756	10.55	24.488	15.508	19.411	19.06	17.422	17.556
23.942	15.357	15.223	11.431	16.596	11.212	12.944	20.542	16.749	9.7317	17.355	12.586	13.525	20.92	18.098	19.876	12.392	20.393
22.935	42.85	53.827	38.123	46.194	39.751	48.449	57.352	34.391	98.758	23.191	39.728	38.964	59.402	26.958	52.258	36.06	31.253
28.382	18.758	23.969	15.013	22.237	16.047	27.403	10.389	19.447	14.645	23.191	15.801	21.226	19.978	16.813	24.259	12.573	24.23
28.231	18.758	23.969	18.127	23.866	16.047	23.715	17.7	20.675	13.822	27.87	14.527	25.396	19.09	27.325	24.259	18.836	24.23
25.058	17.122	19.973	15.955	24.774	16.709	19.333	14.811	20.675	11.586	21.068	13.954	22.528	15.815	19.132	16.999	17.63	17.13
20.142	21.311	23.388	18.217	25.393	17.426	25.401	30.677	26.532	14.785	30.887	15.538	23.288	19.349	21.35	20.177	18.804	31.12
18.995	8.5545	12.287	7.5767	12.961	7.9671	11.666	6.7371	8.5151	4.6091	10.613	7.6916	8.655	8.6384	7.014	9.3062	10.25	12.405
23.654	15.97	16.964	10.879	25.123	14.983	20.918	14.351	8.8834	10.738	14.418	14.671	15.786	12.189	18.946	12.284	17.864	12.591
14.754	8.1633	8.0461	7.1385	8.8945	13.318	9.9947	8.5989	11.633	5.9469	13.999	5.6366	9.7501	8.7	10.066	10.29	15.668	11.9
19.663	11.443	12.074	9.354	13.507	14.261	11.001	7.5881	17.058	6.2922	16.265	8.5485	9.124	10.34	9.0801	13.617	11.861	11.9
19.663	24.809	26.589	24.67	25.791	21.003	30.784	19.638	30.692	15.65	19.945	19.686	22.89	17.261	15.324	27.506	18.576	16.931
25.872	20.3	14.666	16.422	15.615	20.729	19.183	16.809	19.406	13.745	33.865	11.524	31.298	20.84	27.026	23.452	25.33	32.012
29.353	20.3	12.253	16.422	14.106	20.625	17.333	14.559	19.406	12.044	26.29	11.524	25.733	20.84	25.412	20.053	21.858	24.147
28.959	31.044	34.165	25.707	35.52	26.02	32.37	32.093	30.106	21.989	27.246	24.153	32.265	31.521	30.938	24.629	29.073	31.627
33.38	45.017	36.323	42.335	45.802	48.282	39.267	51.768	46.687	41.399	31.378	29.667	45.735	32.859	49.799	36.595	45.156	35.017
44.264	38.269	32.348	35.028	32.905	39.855	35.811	38.495	40.841	36.185	41.41	23.354	42.582	28.447	43.594	31.368	49.857	43.106
53.707	35.011	42.631	34.004	43.667	33.677	41.314	36.075	40.823	37.798	49.619	51.592	43.536	55.439	35.685	45.254	43.094	56.085
46.136	29.535	32.686	27.87	33.998	30.348	34.329	28.055	33.486	29.754	40.555	23.102	32.417	26.471	32.732	30.928	35.467	53.664
56.225	54.86	46.393	59.992	48.976	52.065	50.443	50.075	56.674	50.775	57.498	39.437	52.547	49.131	68.731	60.275	54.352	58.154
92.506	77.938	60.765	111.96	63.873	105.69	61.365	120.15	69.285	132.08	69.061	57.332	79.072	51.602	99.974	55.641	117.29	69.217
49.993	47.966	44.502	34.534	51.928	39.816	60.539	45.585	42.485	47.496	48.854	40.919	38.545	33.503	39.131	50.949	52.311	67.421
35.386	34.73	36.59	24.014	36.809	27.39	46.082	28.72	31.122	20.479	48.854	34.203	38.545	52.847	40.742	52.986	34.328	60.784
73.82	50.697	57.431	53.558	50.403	44.285	60.223	40.438	58.683	37.629	61.109	64.27	49.399	65.467	58.645	67.418	45.152	63.069
80.714	68.852	96.014	53.558	73.001	56.84	80.582	42.374	70.68	46.534	78.345	75.799	68.114	77.627	58.645	67.504	50.988	62.825
80.714	47.596	50.843	81.863	48.71	87.283	61.979	77.925	48.978	90.514	35.475	52.476	51.136	38.138	61.022	31.356	66.394	37.528
65.337	47.558	63.313	56.95	59.6	52.397	61.979	54.039	59.334	50.347	60.627	51.612	47.551	52.492	55.321	56.065	46.454	57.839
22.298	66.976	72.894	71.858	60.427	61.105	61.488	58.797	73.129	60.177	59.51	99.846	60.215	97.77	54.099	84.175	53.83	60.068
82.419	67.391	69.74	85.119	64.822	68.543	67.196	70.513	67.804	55.573	74.287	75.675	64.585	76.431	61.869	74.15	65.889	79.331
94.891	85.69	124.43	85.119	118.19	68.543	84.313	93.071	82.517	55.086	82.289	73.779	84.696	72.038	80.882	74.15	78.6	87.082
100.49	110.73	124.43	103.52	118.19	101.06	98.933	101.06	110.89	88.477	129.86	95.408	97.254	111.7	100.73	113.58	114.18	98.679
80.72	114.57	109.09	135.93	94.276	118.47	84.282	112.5	105.88	112.06	107.38	140.56	109.64	129.22	102.34	139.68	100.13	119.18
93.143	141.53	126.54	187.8	136.59	137.52	150.73	179.12	148.65	135.93	130.5	135.79	157.89	153.01	130.28	168.4	116.71	128.73
102.12	103.19	143.98	131.35	147.33	137.52	125.2	140.74	148.65	107.1	101.64	87.458	96.703	89.559	130.28	91.596	107.51	98.619
102.53	73.131	67.026	75.668	66.893	71.475	54.819	73.332	62.52	80.976	81.62	87.458	74.903	87.484	77.798	85.753	69.845	95.804
59.847	72.543	47.35	99.039	66.32	107.59	76.427	105.72	81.829	89.707	93.707	58.714	75.726	62.626	91.065	74.182	91.044	71.313
69.688	58.56	61.569	84.027	46.089	91.48	52.584	169.18	73.681	119.5	44.488	66.964	58.303	45.66	67.977	46.839	80.807	48.606
63.349	58.56	61.569	79.987	46.089	85.349	59.277	85.145	73.681	89.671	60.905	66.964	66.527	45.66	66.708	46.839	65.977	62.82
61.468	48.468	52.142	61.013	48.822	61.865	51.524	60.437	61.843	68.157	38.728	52.172	37.497	43.072	43.598	46.006	41.891	37.993
139.44	130.56	137.99	130.92	125.45	117.65	121.67	99.095	102.85	112.21	128.34	164.07	132.61	140.16	134.36	127.73	133.91	118.29
114.56	130.56	135.97	141.69	148.37	132.21	141.7	104.58	138.39	112.21	119.51	139.79	121.67	128.12	122.99	127.73	133.91	118.29
177.13	151.67	144.66	173.75	174.92	153.28	183.7	145.05	195.89	126.73	148.94	117.67	139.06	137.05	131.11	153.48	139.24	152.83
69.254	66.2	60.141	93.528	62.482	87.234	67.177	90.706	78.71	90.327	73.83	66.336	65.479	63.046	62.696	67.808	61.492	82.17
63.339	61.825	52.359	93.283	54.075	79.202	60.931	87.814	79.115	93.16	53.547	41.997	56.192	47.265	63.34	46.775	67.238	63.911
56.238	42.041	63.27	61.27	58.741	63.186	60.931	69.617	46.292	92.452	41.428	73.171	36.997	56.022	43.737	50.242	39.083	51.3
65.274	87.063	49.704	109.22	53.029	107.35	65.818	107	81.011	119.38	104.02	49.707	94.87	74.751	124.58	88.339	111.03	94.052
69.23	62.435	50.78	92.843	58.585	90.959	81.83	99.596	81.011	114.15	73.792	53.515	55.956	48.804	55.472	50.866	56.269	58.84
103.52	92.013	96.1	92.843	97.413	90.959	96.846	81.105	92.969	81.184	94.908	126.02	89.789	113.17	85.654	99.324	74.831	87.571
66.278	104.49	92.688	116.39	91.605	117.97	91.32	141.18	91.627	141.57	98.029	82.322	120.01	111.45	122.51	94.561	145.71	110.54
130.25	42.13	55.756	63.217	63.687	51.063	65.164	56.764	61.902	68.167	55.231	64.134	56.118	46.542	57.027	59.439	63.89	60.276
117.3	52.768	50.039	88.946	66.72	78.623	71.902	83.783	65.01	89.92	46.429	43.227	43.171	40.412	44.065	49.042	49.155	46.134
77.652	77.227	74.355	121.68	73.449	93.362	93.167	100.03	97.711	103.78	79.599	81.044	77.551	74.36	80.05	68.369	77.195	78.87
99.702	74.545	73.467	86.069	70.963	78.749	60.823	81.247	66.524	88.164	78.641	94.81	71.493	87.732	72.869	88.787	71.623	85.907
173.55	167.54	182.09	158.91	182.98	156.1	194.33	114.12	161.19	104.42	155.04	185.97	167.6	199.36	157.43	186	136.45	168.35
106.22	67.299	73.479	80.2	71.124	84.728	68.943	92.927	74.85	85.775	79.577	110.57	59.636	89.764	60.403	85.641	67.304	79.99
162.37	157.51	153.6	146.19	171.47	155.73	176.81	158.87	170.16	149.13	147.17	179.3	148.59	158.09	166.47	164.16	151.73	145.34
178.62	132.45	153.6	137.47	164.79	131.56	143.7	118.9	167.95	126.9	127.57	136.84	146.81	130.05	157.49	128.47	145.76	116.3
205.43	170.04	151.23	161.09	177.07	168.95	165.56	164.31	164.16	193	147.96	145.36	171.12	142.12	179.96	145.1	189.99	149.49
220.35	90.877	95.112	100.72	124.66	90.345	107.94	105.28	97.873	126.47	95.401	130.29	91.781	129.22	90.041	120.25	96.033	96.696
116.53	73.017	82.022	83.981	86.775	87.282	76.062	74.575	71.068	96.157	81.559	126.42	70.894	108.56	71.946	93.761	80.634	81.479
137.88	204.91	132.06	165.69	145.4	174.19	146.78	160.7	168.94	144.53	230.03	191.5	251.3	210.35	253.06	235.06	213.55	203.42
73.478	141.47	102.08	140.63	121.06	141.67	113.05	139.32	136.14	160.02	165.48	96.468	164.65	114.03	160.71	129.04	160.67	150.39
73.541	91.177	69.464	113.3	75.605	127.01	76.295	121.47	86.053	160.02	87.116	76.067	101.1	89.252	109.08	89.433	112.43	89.105
91.287	117.44	105.34	119.82	99.372	113	107	117.01	92.911	207.44	106.83	144.49	118.07	112.68	120.53	111.46	113.41	108.4
72.909	108.09	96.087	95.401	92.778	108.95	99.361	117.01	112.35	128.33	83.474	96.857	89.932	82.979	92.64	77.986	88.983	97.067
72.527	86.549	62.313	105.4	78.816	101.6	80.688	118.83	81.424	120.32	76.375	67.871	84.329	56.455	86.244	60.385	89	74.889
52.073	51.38	58.548	85.303	69.28	64.207	71.375	67.539	67.723	56.21	48.197	67.281	36.732	48.347	41.831	49.845	38.914	49.748
132.96	72.079	85.926	63.057	93.307	60.434	89.6	51.087	81.38	43.89	80.907	91.975	67.997	77.18	60.42	73.052	57.657	75.112
83.849	56.863	70.254	52.094	59.349	55.393	52.949	49.055	49.239	50.078	54.055	91.321	55.017	69.276	57.516	53.188	57.657	48.288
119.61	92.602	94.036	95.296	91.107	108.47	85.879	107.61	89.369	101.5	80.875	61.472	88.941	85.138	83.386	86.104	94.094	92.784
111.87	92.602	102.42	85.18	96.453	94.071	87.323	76.382	89.382	70.362	80.875	90.986	88.941	85.332	83.386	86.647	81.124	95.901
73.436	65.675	66.99	64.991	63.261	58.623	60.235	63.503	54.334	61.558	68.791	62.135	62.326	72.138	57.219	71.448	66.628	68.95
64.903	167.29	166.28	153.67	188.6	174.42	170.19	146.86	161.42	166.32	162.64	153.89	158.37	165.89	140.43	187.15	153.28	170.24
249.09	156.88	217.85	126.16	192.17	115.84	171.03	84.775	147.81	95.156	138.93	200.02	120.85	193.09	129.82	203	101.36	160.99
203.58	120.74	161.12	100.09	162.92	106.2	145.53	96.519	134.65	102.84	128.44	150.15	119.96	135.03	118.09	133.33	107.13	118.03
135.9	100.28	126.07	118.45	124.42	119.16	107.06	122.48	100.81	119.3	123.93	132.06	93.747	122.44	76.503	132.06	65.734	105.33
105.92	47.108	39.113	68.74	59.632	64.642	72.281	60.152	62.302	64.574	55.504	38.53	68.071	44.952	60.234	42.484	64.019	55.124
97.185	50.793	45.003	65.006	50.254	60.971	63.624	52.507	62.93	59.718	61.058	64.92	56.318	54.585	55.981	51.298	54.542	64.897
114.41	138.73	112.56	101.84	112.65	86.064	114.37	66.785	117.93	58.313	134.78	137.87	119.1	158.45	111.69	150.95	86.738	140.16
91.263	180.65	126.29	166.38	134.97	158.2	138.92	227.38	155.13	175.2	155.52	137.87	162.42	157.9	168.93	150.95	151.13	162.08
138.38	112.84	101.15	118.4	114.93	126.64	106.97	158.97	114.13	151.28	110.46	122.74	117.51	117	149.38	111.95	125.7	91.804
84.325	112.84	94.591	118.4	99.083	126.64	93.552	116.26	95.318	128.2	110.46	132.29	117.51	128.23	132.38	111.95	103.89	91.804
115.59	79.521	76.098	93.105	76.02	88.626	70.094	146.72	69.534	138.48	87.533	60.718	82.041	69.573	95.556	67.736	89.616	71.709
87.809	90.522	76.098	109.28	78.84	112.94	90.409	176.25	95.38	141.24	87.533	84.088	77.464	56.996	74.114	61.148	71.206	71.054
84.121	62.726	74.935	70.67	64.824	65.211	67.239	112.71	59.324	100.14	54.596	70.145	65.401	47.273	66.868	53.575	75.049	54.778
130.58	85.043	130.01	43.119	108.8	49.028	91.002	84.081	64.939	77.329	80.977	137.16	85.739	105.89	86.503	96.643	78.428	85.307
196.11	161.88	157.07	160.36	151.24	164.43	149.07	165.57	169.71	130.31	131.83	165.53	136.69	143.31	167.06	148.4	160.63	117.61
222.76	250.21	228.94	194.32	220.54	225.86	218.31	201.02	221.69	212.1	226.77	246.16	230.05	265.58	245.52	244.26	207.93	220.28
155.59	226.57	201.06	192.07	202.28	223.58	222.16	215.38	218.39	207.22	233.29	213.09	193.27	218.68	193.62	234.04	171.97	242.78
173.92	143.83	136.32	147.63	136.37	155.31	127.25	170.42	159.41	182.2	142.66	185.96	129.04	181.31	134.3	183.55	124.58	155.88
162.11	125.26	136.32	117.16	136.37	124.61	119.05	128.39	120.41	118.22	139.92	171.86	129.35	153.55	127.49	146.36	144.77	134.4
211.86	180.82	182.67	133.94	185.85	136.54	175.29	112.41	164.75	103.93	215.64	227.28	174.71	226.65	158.97	230.56	158.78	213.38
60.179	125.16	101.39	151.44	100.1	142.26	116.87	151.79	131.08	127.81	117.16	111.15	119.66	108.5	119.4	101.64	165.54	139.33
107.37	99.56	108.92	102.7	105.35	122.2	88.787	120.15	97.019	117.65	99.019	107.87	111.1	91.568	94.463	97.167	111.93	105.01
97.112	121.22	132.68	121.81	138.63	126.39	135.1	150.98	118.23	135.58	101.27	136.48	98.198	133.56	150.78	140.43	104.54	126.56
101.78	73.147	84.391	86.843	69.211	91.989	65.525	94.254	78.11	104.93	61.775	79.494	79.528	59.967	94.452	54.825	131.67	60.928
101.78	75.427	99.661	58.667	86.918	73.199	56.764	70.719	61.951	80.243	87.814	100.95	79.362	110.64	83.436	113.55	88.348	81.531
84.633	63.055	80.801	58.546	77.842	60.972	70.183	61.725	60.071	52.171	71.839	93.259	77.377	82.283	69.163	76.783	88.348	66.255
102.33	32.356	58.503	30.988	47.861	48.608	31.07	46.568	29.546	52.171	37.99	59.925	41.603	66.897	51.88	41.953	54.629	32.488
38.52	28.012	35.988	15.391	35.469	17.961	25.574	10.523	25.713	14.995	31.172	29.537	20.971	66.897	39.742	46.066	36.956	31.833
43.941	28.554	30.848	25.754	30.485	30.122	29.242	21.605	30.161	24.402	35.02	16.192	35.946	24.895	36.851	33.402	44.269	39.307
41.774	14.61	14.736	16.686	19.163	17.604	9.1381	12.21	10.4	12.718	20.02	10.44	17.986	16.811	14.824	17.153	20.563	26.408
26.896	9.9644	18.292	13.216	14.009	13.984	10.868	10.498	9.6425	12.718	14.066	7.3909	13.724	12.552	14.824	17.153	22.994	22.88
30.202	19.538	24.872	19.613	15.872	22.135	27.767	9.5522	18.305	11.626	26.289	17.875	21.438	18.118	20.86	28.769	16.83	36.316
21.593	18.39	11.69	12.818	11.52	15.109	13.362	10.262	13.952	11.159	31.785	15.679	30.839	18.702	24.785	24.259	21.771	36.316
19.148	11.364	16.789	8.5043	11.639	9.7207	13.779	7.2742	12.061	6.5376	21.087	25.492	18.257	18.537	14.687	19.185	12.04	18.018
25.314	15.386	19.947	17.448	16.311	17.366	14.895	9.8	18.225	9.1527	25.626	20.158	19.475	22.036	18.02	22.952	14.336	22.916
18.42	14.99	21.125	13.942	16.464	19.506	35.004	7.8153	15.645	9.8876	12.561	12.138	14.373	12.38	14.432	18.11	16.277	19.535
41.902	30.589	23.692	39.704	41.577	39.727	52.422	33.225	43.871	34.204	32.429	12.381	30.429	17.266	28.704	23.686	39.712	33.481
40.361	20.425	13.573	16.968	20.631	23.982	18.2	16.423	18.213	15.488	36.621	12.798	22.151	14.26	19.193	23.093	20.382	30.449
40.653	49.889	62.279	40.865	61.492	38.503	48.678	37.021	61.446	31.454	42.232	41.062	50.994	60.528	44.727	44.911	50.121	56.88
41.112	43.895	40.731	38.416	41.207	35.355	44.537	28.486	44.635	32.105	39.099	32.55	40.036	35.511	51.172	41.64	36.291	51.198
21.081	27.364	22.181	53.969	21.761	26.819	28.988	23.672	23.464	29.753	27.293	19.725	26.275	14.492	79.408	32.218	21.217	35.421
21.644	35.871	37.472	51.446	32.838	40.686	37.197	25.57	37.887	31.177	36.962	28.307	34.92	18.499	45.192	32.218	40.29	50.886
22.994	19.864	25.838	29.395	15.975	24.683	16.962	21.382	19.099	25.18	21.401	9.7882	26.679	13.47	26.12	14.621	31.444	19.264
58.783	35.897	44.177	23.28	35.486	28.804	24.551	31.68	30.065	36.533	32.129	26.957	38.446	29.702	48.358	33.535	60.998	36.274
54.064	31.924	30.129	53.852	36.924	31.507	28.605	25.724	23.808	32.665	40.804	33.673	41.066	53.482	44.03	37.663	39.804	32.879
84.176	60.781	26.744	82.421	33.449	100.82	42.662	97.595	71.489	107.11	73.038	39.052	77.64	68.42	72.294	69.306	81.957	72.014
84.176	52.94	56.325	73.005	56.903	72.002	56.363	77.112	69.686	90.367	60.766	39.052	67.614	48.926	61.401	51.709	74.535	52.22
100.51	92.229	82.019	121.97	94.846	108.93	113.15	90.535	98.431	99.34	98.874	90.749	85.438	97.599	87.419	88.383	75.232	76.08
68.181	66.225	83.103	79.331	96.374	74.031	108.05	57.657	104.4	53.697	52.195	60.655	57.988	65.211	46.848	61.252	50.751	82.25
67.627	71.85	83.103	106.52	110.14	97.63	144.91	93.948	111.81	103.85	58.102	55.016	67.707	53.513	84.503	58.548	62.684	82.25
57.763	50.842	47.847	68.408	64.175	76.531	44.891	75.094	60.972	83.945	41.172	31.762	45.238	37.429	62.895	38.852	59.54	55.062
104.27	70.103	66.079	89.506	86.965	81.146	93.184	93.294	86.461	99.215	52.537	58.285	62.92	55.124	71.577	47.408	89.686	68.904
144.43	141	190.85	81.678	183.93	100.18	150.99	80.11	108.5	82.23	157.58	206.96	133.71	179.39	129.04	170.13	94.009	154.64
76.895	82.213	99.954	63.441	99.54	50.882	96.712	42.239	80.764	46.362	74.142	102.48	65.575	93.811	60.801	100.57	47.879	85.614
62.745	53.152	101.29	30.515	72.444	43.96	53.058	48.608	53.107	41.134	52.541	85.082	63.102	62.912	69.241	74.081	50.068	60.306
101.17	53.219	76.082	82.935	69.402	41.039	50.063	28.939	49.768	31.285	68.282	85.082	50.149	51.006	84.723	74.081	45.513	71.883
71.864	64.083	102.61	53.138	70.391	37.202	63.385	27.249	54.639	24.842	86.135	105.62	62.635	99.513	69.266	89.657	48.194	84.228
40.977	40.437	36.319	34.338	31.673	35.731	33.721	29.306	35.968	29.322	51.384	60.087	49.958	46.908	45.762	47.557	48.194	48.663
53.648	38.929	40.945	51.453	32.327	39.244	35.553	43.175	28.751	52.788	51.384	40.183	52.55	50.788	47.967	63.93	47.36	38.89
129.53	91.171	107.47	99.472	108.8	91.731	97.295	187.55	118.66	92.767	78.575	141.99	82.226	133.76	79.983	111.94	80.208	92.916
124.19	86.85	82.365	78.009	74.788	80.721	68.949	92.342	76.159	95.895	96.143	127.29	74.071	112.86	64.86	99.968	69.268	80.768
94.625	95.401	92.877	85.426	94.006	87.306	88.21	76.53	84.94	72.068	98.9	127.29	102.03	110.53	94.49	117.7	86.055	95.316
102.79	106.03	103.77	69.984	107.94	81.141	106.32	81.08	93.642	66.154	119.79	113.81	102.03	141.88	102.07	142.93	86.055	126.47
71.433	98.258	88.313	98.891	101.45	87.97	93.441	92.301	93.743	85.046	91.011	84.046	88.778	101.06	85.564	86.954	92.582	110.24
72.564	97.998	69.028	134.08	79.252	114.44	100.42	119.6	107.69	124.09	82.582	56.769	101.74	67.687	114.9	69.461	116.45	101.74
81.034	97.998	101.12	95.698	79.252	108.77	100.42	107.01	109.74	107.59	82.582	116.28	101.74	81.72	133.02	77.198	113.21	101.74
77.63	63.424	63.969	64.339	71.703	71.187	72.899	59.326	63.457	59.746	72.723	59.237	57.891	77.611	58.264	76.06	52.82	75.312
128.35	53.242	40.706	66.214	47.838	51.948	57.055	55.883	63.457	54.767	70.754	45.548	57.891	64.948	64.365	69.322	52.82	66.753
83.293	67.127	80.581	76.681	57.721	79.512	56.784	75.738	66.049	101.99	63.577	84.888	69.324	79.585	65.074	69.613	73.854	62.793
146.43	141.76	145.26	124.56	154.59	119.7	149.8	110.02	152.35	103.51	140.47	125.42	124.47	106.06	121.44	123.68	102.88	133.09
104.82	135.02	108.03	139.04	109.22	147.28	106.55	169	121.57	185.97	111.3	129.31	124.47	115.66	121.44	122.66	132.83	103.53
95.655	56.782	86.505	82.495	71.395	73.065	62.817	119.74	61.965	103.4	75.202	110.07	55.187	107.84	61.583	101.69	73.652	72.947
106.73	79.845	76.415	110.54	75.287	110.82	76.17	97.426	90.462	89.817	86.662	82.82	82.593	77.011	80.765	79.941	102.25	80.684
93.614	137.67	119	153.43	119.57	156.98	120.37	148.82	131.32	153.86	116.58	100.77	133.6	92.9	124.65	110.8	107.96	108.5
71.28	99.491	97.409	124.9	85.119	124.64	87.125	139.93	105.92	170.32	89.417	80.845	95.501	65.357	105.5	74.323	111.08	83.52
80.864	97.562	79.797	121.49	83.858	103.11	86.085	96.692	95.413	94.613	91.794	91.254	95.177	82.207	95.168	88.234	99.43	89.613
33.035	66.467	64.881	86.57	69.841	77.92	71.076	81.184	80.756	84.5	51.826	59.28	49.18	57.37	45.796	58.773	55.826	52.586
102.42	78.511	93.499	108.42	69.841	98.342	83.302	104.66	84.273	98.004	78.14	132.39	68.325	103.72	62.407	107.11	71.045	81.132
90.466	79.358	73.145	118.79	79.116	117.84	100.42	132.18	96.029	149.62	74.608	106.76	81.691	106.75	133.87	101.63	107.74	70.555
162.68	87.816	104.4	60.497	102.34	86.518	96.301	80.287	72.762	103.59	122.13	120.22	94.212	137.4	91.192	102.26	114.39	90.65
188.83	87.295	88.961	88.648	82.373	81.546	89.417	77.828	90.331	74.019	96.068	86.722	100.84	92.602	91.192	96.217	92.424	92.913
119.78	151.51	121.1	145.3	136.74	175.19	128.49	219.85	152.23	194.31	123.59	124.73	155.86	95.165	173.73	99.834	182.85	122.42
69.778	152.79	118.85	147.3	129.47	149.27	154.62	184.47	149.61	147.8	130.18	143.53	158.11	137.84	147.38	126.75	155.72	131.03
65.954	79.593	50.561	79.244	71.226	83.41	80.169	102.49	72.869	100.18	70.323	59.41	74.259	71.17	79.827	79.448	90.276	64.265
88.919	96.81	137.55	99.01	133.71	90.334	108.95	75.055	118.03	80.562	70.545	137.36	64.208	84.25	71.014	83.666	69.757	88.177
64.676	117.8	108.02	123.05	129.84	122.83	112.53	126.1	118.03	136.9	95.93	84.632	111.2	76.771	106.74	77.177	113.3	98.772
169.13	134.25	145.77	90.157	152.57	87.525	149.53	83.664	115.36	81.291	146.78	147.19	135.25	185.34	114.29	141.64	98.154	143.62
148.8	137.79	163.23	110.81	152.57	126.15	149.53	166.06	116.69	111.33	147.76	194.97	135.25	185.34	116.4	166.7	118.26	150.42
105.74	102.27	101.27	110.81	106.99	88.861	106.87	84.778	92.01	76.599	99.43	110.99	85.863	116	76.247	115.16	73.986	102.35
101.67	124.01	136.81	105.6	132.47	115.02	122.73	117.6	118.18	110.93	115.01	107.21	120.65	107.26	127.8	100.5	121.46	116.85
129.8	112.19	98.798	97.317	78.848	112.17	106.34	120.69	92.042	128.77	88.289	105.39	120.08	84.54	116.63	87.155	121.46	113.06
141.43	159.59	145.91	123.21	139.01	136.61	136.36	137.87	137.54	130.74	164.39	160.38	175.66	187.05	165.39	167.18	156.24	155.47
133.32	171.89	158.87	162.44	173.13	157.91	175.05	104.18	190.42	105.39	185.31	160.38	127.03	187.05	82.644	184.97	96.566	179.99
123.19	125.39	83.463	169.02	105.1	160.69	116.04	178.52	144.24	175.91	116.35	105.22	129.23	103.76	143.92	98.333	135.18	106.93
78.96	104.66	80.29	101.29	86.164	102.81	85.184	112.96	97.215	110.12	116.35	92.971	112	88.323	105.68	98.333	103.2	106.93
80.809	91.5	93.311	100.19	74.963	103.92	76.592	115.67	87.937	131.74	81.016	100.28	107.59	84.955	105.68	72.031	117.25	71.671
70.407	58.163	61.8	71.486	62.294	81.304	78.835	95.334	68.455	94.416	59.666	75.922	65.796	69.281	76.159	61.561	84.574	52.558
69.708	49.754	56.014	71.968	61.264	66.969	80.267	87.51	62.516	98.88	48.328	71.143	41.083	59.309	46.513	60.637	50.284	61.234
[truncated: 41,201 more rows]
