# Supplementary material for: Global sleep homeostasis reflects temporally and spatially integrated local cortical neuronal activity
Source: eLife. 2020 Jul 2;9:e54148. doi: 10.7554/eLife.54148 (PMC7332296; doi:10.7554/eLife.54148)
Supplement: Figure 1—source data 1. [file elife-54148-fig1-data1.zip › Figure 1/Slow Wave Activity/Slow-Wave-Activity-Mouse-3.csv]

Frontal EEG	Mean LFP	LFP 1	LFP 2	LFP 3	LFP 4	LFP 5	LFP 6	LFP 7	LFP 8	LFP 9	LFP 10	LFP 11	LFP 12
66.289	132.58	138.28	125.9	109.63	101.05	130.73	112.46	102.21	113.5	95.06	93.598	82.12	102.26
79.486	82.814	125.82	88.184	92.443	68.221	96.505	90.333	71.78	69.091	68.46	98.382	53.567	67.203
54.226	46.525	81.455	43.988	45.827	40.916	53.721	54.33	24.006	44.315	39.237	42.124	32.497	46.107
43.544	95.741	104.1	91.691	86.729	76.987	86.353	83.526	57.159	85.9	75.253	69.1	62.708	75.124
65.998	108.76	130.67	129.44	109.7	96.487	111.02	90.779	62.665	96.69	85.368	78.134	63.655	88.484
70.314	70.535	90.335	81.974	73.259	70.817	86.897	50.606	34.725	64.026	55.997	58.952	39.63	61.038
64.057	94.402	119.39	86.789	103.13	80.615	103.97	67.261	47.976	87.461	70.425	82.338	49.707	85.226
51.049	82.638	81.102	76.144	78.746	74.755	74.156	59.595	49.202	78.269	74.976	65.384	51.761	75.762
54.193	89.408	100.7	93.764	83.135	83.622	84.777	80.762	63.492	80.73	72.541	76.369	58.38	81.671
75.12	105.1	117.26	114.78	97.427	94.898	112.45	83.369	62.189	96.622	74.782	76.369	61.563	92.948
80.981	97.108	106.68	95.812	72.286	94.893	94.896	87.354	85.77	85.965	79.876	60.072	72.482	72.906
51.669	69.43	106.38	61.508	74.994	61.75	72.557	51.036	37.126	57.963	59.707	48.761	39.218	63.293
51.669	68.586	90.273	61.416	74.994	57.264	70.166	51.036	34.414	57.963	53.447	48.742	35.71	63.293
53.162	84.645	137.25	74.999	104.62	69.356	91.251	63.279	49.05	66.52	60.904	74.314	47.834	73.683
52.062	50.421	75.69	54.274	57.559	43.369	53.914	46.971	26.286	42.057	41.537	43.215	29.42	59.557
53.42	50.421	71.906	49.302	51.185	38.244	44.981	46.971	30.447	50.089	41.537	42.535	36.913	53.246
52.8	73.129	120.1	90.059	76.194	45.514	83.361	98.308	64.925	72.881	50.285	64.951	49.404	55.122
46.77	50.882	93.665	50.255	45.998	32.882	42.442	106.25	31.297	62.603	39.285	45.646	28.921	35.128
48.75	74.522	81.113	63.124	78.98	58.194	74.888	47.891	34.472	67.955	53.513	76.639	43.167	69.505
86.634	79.052	110.59	76.303	92.114	66.387	94.846	65.805	43.942	73.502	62.415	69.713	44.271	79.588
78.595	88.719	87.347	78.619	95.218	76.39	94.846	76.882	43.942	88.494	71.794	80.881	50.128	90.996
59.865	92.258	109.38	124.04	85.711	72.981	79.281	109.71	63.145	88.494	75.09	80.881	55.72	90.996
53.537	60.039	72.352	60.124	52.971	49.644	51.558	96.964	39.587	49.388	46.399	61.457	44.313	41.585
53.537	74.08	72.352	76.119	56.003	73.761	63.666	70.499	63.671	67.576	50.43	58.186	50.432	60.418
56.559	75.898	70.494	77.077	56.272	70.841	63.666	71.425	55.735	70.616	66.457	55.358	56.425	60.692
38.948	60.195	59.476	68.337	45.924	55.995	56.402	57.005	46.417	49.864	47.179	38.077	42.549	44.796
38.948	60.195	59.476	55.618	45.924	42.599	46.281	62.438	39.933	49.864	47.179	35.814	42.549	44.796
66.753	57.264	47.794	62.698	51.17	42.599	51.544	87.077	29	56.244	49.786	35.814	38.586	47.323
36.278	54.814	47.794	55.356	51.17	49.813	56.139	38.021	28.554	48.167	41.691	43.057	28.699	51.473
44.921	47.07	64.743	54.347	46.284	43.995	41.959	42.252	28.379	43.66	39.011	37.891	31.089	47.191
42.576	54.878	56.892	53.382	46.284	47.243	45.182	66.827	37.466	51.951	45.796	57.751	34.393	50.605
42.576	63.144	78.016	68.909	67.77	53.812	57.772	57.068	53.84	57.881	54.083	45.93	45.553	54.553
36.265	70.521	68.544	79.913	61.309	61.196	57.265	57.068	57.637	71.046	64.854	49.689	63.913	65.369
34.977	37.814	35.89	39.054	36.692	30.113	33.804	42.106	22.667	35.4	27.725	35.123	22.15	34.335
39.407	60.775	79.982	63.556	59.353	48.229	60.228	44.319	35.326	55.343	45.855	48.55	37.128	52.745
26.347	61.945	73.658	69.137	71.509	56.033	60.762	44.66	34.656	52.961	46.027	60.3	36.556	52.992
32.422	29.849	37.801	46.75	29.836	25.344	32.105	31.418	17.712	27.992	29.781	21.988	22.508	25.823
47.671	53.079	52.63	84.053	47.014	49.234	53.432	45.848	37.685	48.81	37.15	37.033	31.574	42.512
22.201	16.818	25.034	20.576	14.445	17.218	24.469	13.153	10.504	14.703	14.373	31.221	11.028	14.161
35.763	41.208	47.47	65.856	32.78	37.371	30.758	39.624	26.367	47.274	33.55	183.35	26.827	36.536
29.326	23.284	34.764	32.9	16.477	16.434	21.176	23.779	14.597	18.954	25.573	18.334	18.64	14.41
29.326	34.81	41.009	49.21	27.176	33.879	32.674	33.371	28.315	32.096	35.258	18.334	25.545	21.531
36.632	30.891	48.841	38.637	26.544	24.843	37.111	49.377	37.328	25.532	29.809	18.272	26.484	26.669
67.066	98.776	136.05	114.47	107.61	80.05	110.78	79.229	65.493	90.396	78.57	97.896	59.095	83.827
43.312	84.553	110.22	103.93	83.023	59.173	82.296	62.364	39.758	66.599	69.955	67.866	35.903	73.277
75.334	65.708	83.623	59.032	67.71	51.713	68.921	56.258	59.515	67.41	61.579	51.827	53.413	59.091
86.634	110.76	136.45	113.35	120.02	98.223	121.69	87.664	66.983	101.53	98.343	112.15	76.241	108.51
110.11	65.929	136.74	83.277	118.05	77.592	125.42	84.732	66.983	75.876	75.754	93.906	89.935	70.47
108.31	80.477	118.27	118.19	111.89	91.47	131.37	107.39	81.576	103.55	92.374	99.201	97.582	101.74
117.99	87.359	146.62	103.13	105.93	71.933	113.77	66.48	96.089	90.773	71.891	100.1	73.564	97.045
83.136	156.24	156.07	166.34	197.26	155.88	163.17	141.19	109.86	133.34	120.76	124.58	95.186	132.47
67.6	105.55	96.563	89.882	94.623	92.285	89.091	104.24	78.247	100.23	97.738	73.902	104.28	95.278
63.006	91.775	96.563	91.587	87.505	70.267	81.97	69.327	60.084	86.273	90.529	71.166	74.445	80.098
58.932	94.718	118.37	94.728	95.194	78.318	100.26	63.562	49.196	86.273	62.957	73.076	50.178	83.76
60.985	111.44	105.13	90.886	117.24	86.336	98.866	88.573	56.252	88.04	88.883	86.12	54.921	86.163
69.946	104.2	131.98	106.22	119.62	94.501	105.55	86.127	56.252	97.28	96.267	97.332	58.854	95.236
77.712	94.059	125.97	100.28	100.2	104.63	128.32	97.824	74.879	84.613	100.03	81.014	84.317	91.229
150.55	202.01	184.56	239.15	178.48	215.78	212.83	210.85	254.11	179.86	198.09	150.8	200.79	158.62
104.27	62.297	81.438	61.398	78.197	65.992	86.424	77.802	100.18	86.339	73.176	101.36	88.13	84.891
119.57	100.36	100.27	90.108	123.76	93.182	114.25	90.14	110.7	104.55	113.35	124.08	134.55	107.59
116.14	72.993	127.28	79.843	107.99	81.928	113.15	75.789	102.29	81.722	80.483	83.084	98.529	87.982
135.81	82.738	134.48	98.388	149.85	104.75	142.25	91.202	104.97	76.362	73.66	69.904	98.755	70.049
169.41	127.3	208.82	131.41	189	125.73	188.51	94.34	101.24	112.49	107.64	115.35	117.15	118.97
136.34	97.176	141.39	93.997	147.96	100.69	137.41	117.21	116.87	96.086	92.73	99.885	101.92	94.515
150.9	213.53	159.91	155.53	200.15	147.08	162.68	150.51	119.39	246.51	214.62	263.18	198.79	263.97
135.11	150.95	162.91	155.53	193.79	144.86	162.68	152.11	162.88	141.73	139.78	149.23	162.58	153.34
139.31	197.24	162.91	168.51	122.21	180.09	143.34	152.11	182.74	191.11	237.54	149.89	250.36	177.74
190.52	147.25	200.04	158.31	182.16	157.66	191.63	122.84	149.89	135.09	123.74	121.78	135.33	126.44
130.96	77.925	124.26	92.442	124.33	86.566	119.83	89.834	96.86	80.771	81.355	121.78	125.34	88.568
170.81	153.15	171.03	130.71	147.59	114.64	142.14	128.35	155.93	166.7	205.57	185.67	229.03	162.82
187.9	121.12	190.23	147.23	166.71	137.45	183.38	110.33	139.12	108.78	117.63	124.5	156.72	111.45
158.26	73.921	151.55	94.117	120.11	76.07	112.21	73.732	119.35	62.741	68.662	85.453	106.25	67.335
92.074	97.078	99.92	89.748	127.18	87.812	100.17	110.07	81.093	110.1	106.93	130.87	93.797	119.73
147.25	108.87	160.48	121.5	154.28	106.85	140.09	98.013	70.68	124.27	94.056	137.4	86.576	131.9
161.77	100.25	171.79	124.46	176.79	103.65	140.34	126.39	70.44	85.812	90.579	121.18	77.733	112.62
175.45	138.93	164.96	157.1	166.38	140.11	159.97	138.39	135.23	123.68	111	129.72	124.74	132.72
163.74	153.59	170.87	138.9	169.6	124.41	158.13	130.64	144.21	162.03	167.32	178.47	164.74	176.99
115.68	185.21	146.5	170.98	154.38	172.47	161.19	167.56	160.95	176.53	179.02	176.41	188.2	181.45
97.937	152.25	136.06	160.16	132.44	167.28	161.06	156.24	160.95	113.46	123.32	109.68	147.95	151.73
79.024	125.99	68.821	105.95	55.118	114.53	70.564	133.03	138.48	131.01	135.91	133.7	147.95	148.21
103.58	98.764	99.048	101.61	95.928	98.436	107.92	110.59	112.33	129.67	135.91	108.14	147.02	118.05
113.17	112.8	127.36	119.3	132.19	102.98	107.92	117.74	137.37	116.31	129.49	103.41	150.28	172.64
121.28	133.3	150.15	171.03	132.85	153.26	154.36	117.74	131.26	119.03	133.41	108.01	127.21	158.98
124.74	142.84	136.08	120.1	145.6	127.41	124.35	162.01	180.49	138.03	165.19	129.21	183.41	129.62
98.339	115.67	181.15	113.3	138.02	99.133	137.68	100.11	150	129.74	109.94	149.41	167.69	147.46
153.54	153.26	146.99	145.2	158.26	151.49	146.36	138.48	161.25	141.53	164	154.7	170.07	148.38
194.04	128.53	177.71	144.95	143.06	144.82	150.54	127.47	157.95	131.27	137.72	131.59	141.97	130.43
102.13	148.43	81.712	123.34	123.75	111.94	112.59	113.54	126.68	136.17	143.48	174.43	139.61	148.34
115.85	94.715	115.65	121.2	135.08	106.93	125.25	91.529	76.363	116.12	97.815	128.73	79.777	128.96
136.86	97.453	138.31	84.648	130.64	80.761	120.39	67.339	127.73	110.77	117.01	127.89	138.13	121.53
161.89	104.14	177.62	107.61	177.75	96.702	149.02	89.048	139.19	111.23	103.24	135.67	82.24	125.45
222.29	104.14	141.67	107.61	126.29	96.702	132.21	76.741	88.759	111.23	130.13	135.67	138.2	125.45
86.545	97.925	139.33	112.28	124.68	94.559	136.96	89.311	125.61	104.5	103.43	108.84	129.72	118.22
120.29	71.767	119.82	90.324	87.767	78.627	88.748	76.841	87.825	62.22	85.152	69.763	80.983	61.31
136.58	64.414	147.05	109.94	138.23	109.54	157.08	99.282	69.27	63.761	46.584	71.987	65.658	75.507
151.48	121.82	153.95	138.49	190.83	146.62	160.93	109.24	109.3	117.51	116.09	159.55	84.561	150.07
95.943	88.96	97.323	98.413	97.594	94.951	100.64	86.483	87.026	101.6	89.51	107.78	80.467	107.5
95.943	70.256	97.323	75.154	77.422	69.141	87.654	56.831	64.586	54.405	57.885	61.309	62.827	60.305
133.85	155.33	133.57	118.12	111.03	97.693	97.413	107.17	104.26	163.38	194.7	174.06	156.63	156.3
163.99	192.61	173.14	153.94	206.58	166.21	168.76	165.05	192.69	216.88	248.54	232.21	212.17	230.04
115.59	127	158.64	106.47	118.13	100.31	132.54	80.97	93.316	125.72	129.59	135.75	96.487	137.85
63.645	113.97	158.01	100.11	117.24	95.497	117.98	72.237	56.118	109	96.221	94.124	79.243	106.26
53.388	75	83.043	67.822	81.969	65.06	71.209	56.608	35.482	67.944	76.194	85.89	40.874	70.901
119.33	138.65	126.75	143.38	139.32	118.95	148.1	98.026	132.68	159.34	152.02	145.14	136.09	160.98
119.33	128.84	156.12	132.09	156.01	118.32	174.11	105.42	123.91	138.23	153.51	133.09	176.43	120.45
169.52	134.94	150.91	127.8	157.38	121.93	149.62	113.89	150.89	157.51	173.86	193.3	182.41	177.44
154.39	168.91	183.8	170.92	158.98	152.62	184.99	141.7	132.25	164.14	134.48	176.26	147.53	166.48
142.53	105.94	147.8	123.11	114.29	116.37	141.04	115.1	131.3	112.33	93.37	96.809	147.61	95.221
139.42	90.788	120.44	75.141	116.89	78.65	107.26	74.302	71.848	108.94	99.14	127.98	79.744	119.01
65.238	90.788	81.982	101.23	97.144	111.91	98.941	119.73	97.753	109.76	114.53	117.91	101.79	119.29
117.57	74.788	122.62	102.42	99.784	101.37	120.56	99.693	72.951	72.506	79.917	87.298	74.58	73.684
120.3	82.51	119.88	102.42	78.874	106.33	86.711	126.68	98.067	88.471	88.743	84.524	91.915	88.182
132.11	88.378	141.07	91.353	117.19	104.31	114.89	80.654	87.542	95.64	94.31	91.753	100.04	100.36
117.37	136.51	154.32	106.29	156.31	104.74	114.89	124.47	118.3	119.83	139.44	137.31	128.13	122.17
117.37	154.97	135.83	140.34	135.03	127.62	116.42	114.82	110.77	153.69	153.43	148.4	146.25	153.51
151.46	157.94	152.25	140.43	152.59	137.34	151.12	186.73	123.37	153.69	161.13	169.07	160.06	153.51
147.83	228.98	264.87	176.04	230.41	161.13	211.92	146.09	132.62	235.55	261.28	236.79	195.64	230.64
111.3	152.69	124.68	123.49	133.53	123.41	107.94	112.87	117.25	163.55	196.95	153.24	210.68	155.62
107.89	105.52	124.68	124.47	125.12	110.8	120.7	110.39	99.719	91.467	67.682	85.693	102.94	92.279
214.41	177.25	163.41	161.86	142.39	160.65	160.55	157.59	142.44	167.7	161.94	194.5	147.59	181.38
119.3	112.79	94.912	103.56	85.596	127.44	77.461	127.45	133.27	130.34	145.92	140.58	147.59	124.74
99.135	75.5	139.42	88.682	130.95	85.745	124.98	71.381	83.565	68.763	76.696	74.967	111.04	70.759
126.01	96.974	152.59	96.188	173.22	86.877	137.73	96.902	87.852	90.816	57.003	109.43	95.48	104.78
137.11	115.31	118.66	93.737	123.03	103.52	97.435	132.53	133.25	116.94	102.83	147.68	121.38	113.73
131.58	75.76	93.675	108.8	76.017	74.048	91.361	80.767	86.004	91.886	92.562	95.933	91.504	89.047
111.36	118.1	95.481	101.92	128.04	94.853	100.57	94.284	107.59	114.1	119.57	110.49	114.17	111.97
138.58	72.554	95.481	98.165	128.04	71.096	101.82	94.269	107.59	86.605	120.78	92.139	108.84	86.65
196.27	154.51	166.19	146.2	166.72	151.77	153.37	115.78	130.46	163.24	179.02	210.23	141.34	187.39
141.59	113.05	103.82	98.975	89.998	114.22	118.81	106.38	117.28	131.38	117.79	150.76	113.34	147.82
179.33	113.05	154.66	137.52	135.11	132.82	145.32	99.408	105.8	110.32	103.48	105.44	103.28	110.52
135.69	85.257	94.532	107.46	108.8	101.88	95.531	93.657	85.988	119.03	109.16	118.2	103.28	114.42
100.24	53.439	92.565	93.104	102.24	83.732	95.531	79.087	81.451	60.774	70.611	61.091	69.577	59.781
98.889	105.4	96.38	110.38	114.11	87.567	103.79	119.81	108.01	117.35	107.36	119.69	100.59	117.45
107.7	87.914	93.929	62.018	126.03	60.052	91.567	83.566	79.08	82.617	85.261	93.286	74.744	81.674
42.867	43.675	52.122	41.893	65.547	29.733	49.345	60.657	83.38	38.227	57.277	37.306	79.398	35.985
49.812	24.329	35.625	24.322	32.652	29.065	32.499	27.38	25.664	24.972	20.931	27.929	14.067	26.296
68.317	26.706	32.793	29.655	30.499	22.979	27.27	32.512	35.795	33.15	20.723	31.687	20.692	34.103
117.06	80.865	88.344	59.704	89.864	65.366	63.273	61.839	60.237	102.08	95.234	72.964	84.592	83.622
44.306	45.23	43.906	67.062	49.585	29.611	41.842	46.061	28.651	71.319	51.058	57.619	26.74	57.966
71.298	40.702	43.906	45.756	41.821	34.4	41.842	27.117	19.589	48.678	41.55	49.185	23.584	50.185
86.301	104.8	87.793	113.32	118.94	102.48	97.012	116.89	96.248	99.207	80.401	101.13	78.199	101.84
60.979	122.63	93.717	120.88	118.94	103.8	97.012	80.891	63.238	120.44	97.436	118.06	70.807	122.44
61.599	57.823	68.7	49.314	68.287	54.097	48.786	46.593	39.539	80.378	54.257	91.91	42.898	70.397
56.621	81.499	66.811	71.533	80.628	70.675	71.622	71.191	39.484	81.746	70.645	143.52	50.688	81.179
67.255	61.035	50.297	89.81	44.908	63.018	43.855	95.282	102.92	68.695	79.787	34.359	124.85	37.81
119.01	114.89	152.64	95.433	154.22	99.595	135.87	114.57	114.84	130.08	136.72	122.36	138.49	114.64
144.72	143.81	152.89	159.25	163.46	139.09	147.9	123.35	138.87	130.08	155.09	142.05	135.23	143.99
178.71	110.44	140.94	106.09	96.673	103.54	103.87	102.94	160.93	136.62	182.65	149.49	135.23	148.97
113.54	92.675	101.55	92.897	107.36	90.641	94.304	101.13	96.256	83.149	86.45	104.9	102.06	94.374
93.947	91.394	102.4	91.871	101.02	81.541	90.987	108	112.13	102.28	117.35	96.495	128.03	79.447
140.47	142.49	126.6	146.12	134.22	148.78	132.29	128.57	128.47	177.75	188.06	167.03	170.99	173.94
145.49	133.84	107.78	117.42	90.759	117.92	97.187	126.81	145.84	145.01	131.23	134.94	154.3	136.6
94.459	87.426	79.615	80.032	90.759	72.514	81.655	80.188	89.821	92.226	94.519	90.956	89.105	94.439
60.995	61.327	58.952	72.938	67.618	74.786	70.423	79.227	89.821	64.655	91.801	69.675	89.105	69.271
93.479	90.072	86.68	114.58	88.986	111.84	115.85	79.534	66.391	73.311	73.296	82.596	76.494	86.782
158.84	146.46	177.27	132.62	181.6	145.56	176.47	120.27	128.84	158.42	168.65	165.4	146.43	168.67
165.2	136.99	120.2	134.51	106.22	145.56	125.54	128.03	128.84	151	167.91	144.33	146.43	139.14
195.23	244.49	186.56	209.78	191.77	211.18	197.26	199.34	236.96	231.11	234.32	239.42	226.26	243.13
141.41	143.04	150.22	138.96	162.26	141.07	139.87	160.78	182.42	160.1	132.46	142.94	164.65	146.52
79.174	80.044	150.22	124.14	173.54	106.62	140.5	90.967	77.3	85.771	115.1	107.03	100.15	97.153
121.48	115.57	126.48	114.85	121.95	116.85	119.87	100.13	104.42	131.34	120.92	121.61	122.75	112.39
146.27	159.88	178	196.9	161.7	188.19	169.7	170.63	143.72	171.91	114.62	184.28	101.37	168.09
128.3	113.82	106.98	97.647	108.97	103.56	93.057	112.74	141.77	123.13	146.63	155.69	141.09	133.45
144.29	177.53	136.06	137.61	119.06	145.82	126.54	132.83	155.64	179.81	191.05	174.23	175.97	166.24
137.55	177.53	146.92	181.2	125.79	173.46	147.31	168.59	169.71	177.86	191.05	165.45	240.8	154.1
218.51	92.396	183.1	101.15	114.51	86.394	137.87	100.74	136.38	88.962	151.54	84.625	188.58	75.455
147.01	128.57	103.84	136.94	77.696	124.13	106.25	140.29	131.1	141.13	154.65	112.19	172.32	127.31
81.05	128.77	84.761	113.82	96.985	129.93	97.614	132.07	129.67	108.44	112.21	88.276	125.98	88.246
107.33	86.693	103.22	77.7	102.15	81.883	87.11	84.068	81.991	75.394	64.722	60.211	63.156	66.067
126.17	113.85	113.84	101.82	129.2	94.698	119.68	81.927	76.492	110.64	95.343	111.14	94.757	124.89
125.08	100.69	139.19	100	139.67	87.292	116.31	81.927	68.774	110.64	95.343	122.18	73.968	126.36
168.31	109.56	166.07	105.4	152.02	98.154	158.86	80.237	63.54	119.58	109.23	138.27	86.976	124.78
224.78	216.57	214.7	189.54	201.34	182	196.8	172.63	181.19	222.29	209.63	251.17	198.61	220.44
202.94	265.55	227.36	211.69	251.94	209.97	218.12	178.54	154.88	300.99	274.74	322.49	179.53	318.07
162.76	289.04	193.12	218.19	221.12	244.96	217.85	207.38	205.67	323.97	313.38	291.03	312.97	320.84
172.82	270.72	204.42	206.96	231.4	211.91	201.99	195.32	191.2	306.13	320.89	334.07	312.97	318.76
92.644	103.06	109.55	83.922	103.29	80.619	98.884	106.12	96.843	112.18	89.399	114.27	124.22	109.65
169.35	94.993	167.39	108.24	133.11	104.46	150.54	69.672	96.843	125.74	101.57	125.25	123.41	134.58
174.81	118.64	162.65	135.02	150.16	136.64	149.39	104.84	100.08	116.42	119.47	100.02	102.68	118.89
102.41	108.75	83.146	93.945	113.17	92.805	92.378	82.466	83.983	123.81	99.605	208.64	86.402	142.47
92.17	101.59	89.69	78.193	125.56	81.831	77.406	87.508	97.273	96.258	89.828	104.44	108.44	99.456
108.3	129.34	182.1	136.54	212.7	135.95	170.42	117.8	115.14	109.77	113.8	104.44	131.33	114.27
89.327	114.47	130.71	123.55	137.69	121.75	108.71	126.05	98.849	77.707	80.299	101.13	82.283	100.7
111.86	138.61	130.71	132.54	137.69	129.08	102.92	152.35	146.97	109.75	92.441	113.01	94.069	126.76
118.53	99.41	111.7	96.754	94.695	80.89	99.828	87.074	84.307	109.75	92.441	105.98	81.844	138.38
104.53	200.67	127.2	149.23	146.87	181.14	134.23	135.98	154.09	207.84	211.97	217.1	150.35	215.82
114.07	126.28	132.78	110.36	113.45	126.21	126.98	166.54	119.63	128.3	135.82	119.7	142.88	122.09
156.19	168.48	135.53	175.81	134.99	192.58	139.96	189.85	209.68	152.77	176.27	149.92	200.42	150.75
166.03	198.57	183.22	183.18	180.56	170.79	189.26	183.22	202.26	206.39	241.87	173.56	232.94	190.59
166.03	197.33	203.17	160.08	185.07	170.79	204.74	183.22	202.26	181.2	179.43	177.76	172.61	182.05
109.91	135.17	102.82	118.54	97.085	124.06	92.413	167.81	175.66	136.31	151.33	150.93	165.46	120.81
143.32	132.64	98.778	135.25	116.3	129.27	109.66	117.49	126.18	136.31	151.33	209.36	139.93	131.64
146.64	112.91	186.18	135.35	172.61	138.28	175.49	99.741	95.964	95.859	85.236	103.1	80.058	101.69
134.54	149.25	88.501	134.23	121.87	130.19	87.709	169.3	125.43	144.13	134.42	147.26	147.54	150.61
216.51	121.65	214.99	101.78	162.25	96.396	160.43	119.17	107.6	124.5	117.55	142.4	116.52	130.33
164.21	137.22	214.99	108.41	162.25	115.78	160.43	160.18	130.17	151.06	141.35	165.74	130.49	158.98
112.05	153.87	151.28	131.94	141	132.41	140.2	184.99	130.17	151.06	126.53	158.72	118.32	148.97
190.2	157.46	177.69	149.31	174.05	145.37	164.14	144.73	135.75	157.59	133.21	182.13	131.16	166.73
187.54	153.92	164.82	154.07	133	167.1	161.69	142	142.79	139.74	166.19	139.63	182.38	138.88
166.68	130.97	107.57	129.31	131.64	147.35	102.45	173.6	182.71	119.26	133.98	109.15	170.19	104.69
79.747	130.97	75.734	125.37	89.051	147.35	85.226	135.62	141.21	119.26	133.98	109.15	149.19	104.69
117.1	72.891	96.426	88.718	71.975	90.213	79.472	88.315	110.74	59.225	108.62	46.15	137.48	46.903
119.33	103.98	128.23	105.9	158.36	102.81	123.36	99.21	103.5	92.917	84.402	112.57	81.931	95.823
119.33	95.465	143	114.26	159.77	110.05	132.03	104.66	107.15	96.154	96.281	90.323	91.473	101.07
140.48	84.531	114.02	99.364	101.94	97.868	106.22	88.454	86.288	68.945	45.892	77.311	41.935	77.354
219.78	134.16	202.21	137.01	179.57	108.02	175.61	103.87	97.07	133.33	109.37	155.02	108.05	141.9
298.71	199.37	218.19	174.06	182.66	183.18	191.98	205.85	210.92	211.2	222.55	196.64	229.83	210.82
157.95	164.75	166.5	189.68	148.57	200.37	181.92	197.38	210.92	144.5	145.73	144.13	142.31	131.41
135.26	160.89	138.67	144.12	164.59	139.51	146.55	146.7	153.9	177.23	219.2	217.29	181.85	199.47
127.08	160.89	153.53	142.61	182.04	134.72	172.72	119.78	113.83	177.23	208.29	217.29	196.08	199.47
160.26	216.34	220.95	209.6	232.73	205.78	225.96	153.3	166.93	193.22	187.22	221.62	188.88	209.81
85.878	102.3	81.233	100.35	112.42	106.52	94.958	117.89	132.24	85.891	102.86	124.71	112.05	99.715
176.02	64.738	116.7	88.832	98.125	69.482	84.77	143.25	86.142	63.518	77.36	47.386	90.159	48.177
85.805	51.158	94.925	65.641	90.288	56.792	70.713	51.24	77.835	47.036	58.24	64.583	68.501	48.177
85.805	82.482	91.263	93.015	98.309	90.823	106.38	70.987	75.106	78.385	64.775	72.855	65.321	74.988
115.05	82.482	140.84	90.251	140.45	90.634	133.35	75.185	75.106	82.844	62.122	115.99	63.407	90.621
118.66	88.886	149.93	106.94	186.75	107.69	161.56	76.078	69.938	87.365	62.178	115.99	63.407	95.433
122.77	69.545	101.07	72.115	101.7	85.179	97.632	68.08	71.404	51.462	59.739	73.393	41.481	57.118
56.32	49.277	88.712	59.466	113.24	37.661	67.601	50.258	40.355	44.568	50.975	54.242	41.481	42.227
46.588	61.148	67.304	59.466	66.085	42.311	60.785	33.032	33.366	63.638	63.687	71.207	48.077	67.979
47.069	26.274	29.74	33.599	38.928	22.702	27.45	29.532	10.812	35.576	27.085	38.38	14.537	37.074
49.382	47.67	37.54	34.898	46.81	30.919	40.837	27.719	16.703	62.088	52.481	75.665	24.788	73.387
38.731	16.433	21.95	23.271	22.076	11.655	22.107	28.941	7.1351	17.163	13.233	20.096	6.5315	25.447
23.641	16.382	27.228	25.431	21.217	16.568	21.496	25.396	10.707	16.659	11.607	14.601	8.0607	17.082
34.063	22.294	32.05	16.874	24.928	18.056	27.507	21.209	14.552	29.94	21.295	26.256	13.772	26.081
18.264	17.782	19.157	11.784	15.887	10.319	14.557	34.201	10.579	20.365	16.832	19.582	10.336	17.051
16.699	11.061	18.26	12.446	15.948	8.7576	13.948	16.254	6.5206	10.136	8.401	12.716	6.1986	12.52
14.611	14.748	18.26	15.944	17.503	12.781	18.313	8.6724	7.4332	13.308	11.885	16.123	7.8707	17.895
30.381	14.807	21.898	14.184	18.97	12.228	18.431	13.445	7.6417	16.791	11.648	18.687	6.3517	17.895
37.545	30.592	45.929	43.061	37.339	25.734	36.263	27.185	13.882	28.997	24.661	31.173	13.92	32.52
37.545	33.916	45.929	41.637	40.79	26.374	38.606	49.099	23.899	31.741	24.306	31.112	15.529	32.52
37.811	68.353	79.623	64.074	73.408	58.15	77.055	61.323	48.141	62.044	59.929	52.431	51.512	59.31
42.072	73.785	86.91	65.49	84.323	67.505	74.455	57.485	46.124	68.323	57.731	60.73	41.938	66.432
31.124	64.43	56.328	57.461	61.763	55.158	50.589	45.76	32.372	61.455	53.241	50.438	42.868	58.805
25.6	35.182	37.838	29.318	40.237	30.821	33.208	28.535	23.554	33.458	34.241	28.284	26.498	29.838
28.113	35.182	43.968	36.007	38.462	40.482	36.561	28.535	23.554	37.155	35.948	29.34	28.001	34.242
44.114	90.215	76.012	77.239	70.161	76.852	74.102	63.973	44.925	100.97	74.051	94.833	54.541	96.07
47.213	105.98	98.342	86.164	108.92	83.679	87.471	67.727	58.969	108.05	87.453	94.833	71.944	101.33
44.984	53.648	56.46	55.405	48.595	52.296	57.501	50.97	36.094	53.263	46.827	47.033	33.862	48.552
71.676	89.642	92.007	95.706	81.788	109.35	95.342	104.81	86.629	85.145	79.91	84.655	59.919	73.964
63.714	77.507	66.428	77.831	55.171	75.274	70.875	100.71	96.207	79.459	103.21	87.463	91.033	80.316
89.104	65.568	66.458	65.315	73.156	55.865	69.527	78.867	80.745	61.809	50.676	87.463	69.951	72.341
80.124	41.428	66.458	60.041	73.156	55.291	69.527	101.69	80.912	44.046	27.968	44.63	43.616	44.661
116.95	65.021	114.13	85.938	90.089	78.998	101.87	87.908	98.25	63.833	48.131	44.63	64.162	51.708
155.74	66.328	102.25	66.778	101.3	58.323	108.08	77.031	94.686	77.878	82.061	103.54	95.508	97.561
90.595	74.451	126.34	71.342	101.3	68.179	114.38	83.061	80.931	89.707	71.994	112.31	60.078	97.561
89.198	130.92	52.929	125.17	62.561	129.13	82.691	146.07	130.73	105.93	123.52	87.949	127.84	97.03
100.53	145.35	121.5	139.88	103.53	134.09	133.06	115.15	123.8	117.94	107.1	111.12	112.04	109.36
100.53	67.55	106.33	66.807	103.53	63.049	100.91	67.523	80.913	77.94	62.137	83.729	61.339	68.19
82.734	77.414	71.557	65.991	60.86	80.517	73.777	91.305	105.13	79.333	83.918	67.129	71.693	70.632
95.441	141.24	94.114	119.38	82.482	121.5	91.456	159.58	171.03	117.69	148.47	137.45	156.28	97.314
92.984	121.47	68.732	105.56	79.368	107.55	82.91	160.22	183.51	107.67	134.44	133.22	171.66	105.14
82.65	133.17	104.6	105.56	86.141	114.66	98.415	180.14	170.44	107.67	134.44	104.69	166.94	105.14
94.815	125.42	70.524	117.07	99.862	112.72	81.745	122.1	110.8	145.72	140.5	158.15	120.09	172.3
164.2	79.999	160.3	95.135	183.61	82.772	165.06	71.676	87.85	79.519	60.866	122.35	62.892	95.829
169.88	82.243	160.3	107.52	158.36	100.29	135.61	124.27	115.04	79.519	79.386	75.552	88.438	88.976
137.62	77.902	84.479	115.31	82.557	105.41	98.259	108.61	89.533	72.09	59.791	61.793	62.314	63.511
133.74	81.328	114.57	110.56	89.602	108.33	97.327	104.33	116.06	66.041	66.738	59.938	68.026	63.141
132.03	115.62	133.68	114.01	123.11	109.41	139.06	116.27	127.83	140.21	117.85	137.65	108.63	148.93
112.49	211.35	135.58	207.5	154.85	201.84	191.29	225.91	193.31	183.08	147.46	163.76	161	171.71
196.5	142.83	229.33	137.66	160.9	136.43	178.31	132.38	137	122.2	149.33	136.04	158.02	140.02
196.5	183.15	181.29	169.83	176.1	177.44	181.07	167.66	187.42	183.34	171.89	169.56	158.02	185.12
148.42	183.15	114.74	165.25	135.09	181.95	141.78	173.44	170.64	179.26	163.38	160.66	165.02	185.12
153.77	186.39	140.83	159.9	133.36	168.18	146	188.87	195.41	169.78	216.17	172.1	226.72	178.47
119.25	86.675	88.871	93.359	87.302	82.471	75.642	105.41	122.17	97.644	110.09	96.743	146.33	103.01
89.434	92.999	122.71	93.426	127.91	85.167	121.42	57.402	60.667	106.69	100.01	135.48	81.566	115.49
125.77	136.8	150.47	136.61	114.85	157.82	165.78	144.1	173.64	131.24	166.53	143.05	193.2	127.44
79.026	119.66	79.587	115.54	86.941	132.67	95.991	133.63	140.72	95.765	166.16	85.429	170.67	91.777
90.873	143.3	106.73	123.17	138.39	140.37	123.1	147.77	154.36	128.69	135.16	112.94	152.84	123.14
119.14	138.32	98.581	124.5	116.89	122.83	115.44	121.21	119.64	129.41	135.16	187.05	102.68	135.16
169.82	202.27	214.39	181.39	207.99	170.04	204.51	177.98	172.64	204.05	193.85	228.39	184	204.85
149.32	114.8	133.9	91.328	124.83	82.242	110.94	112.9	129.15	127.75	132.29	145.4	164.34	135.06
125.57	88.109	69.284	84.326	52.225	82.022	61.073	83.481	95.896	97.717	104.53	184.46	136.8	111.03
108.01	78.462	108.9	73.701	102.69	74.477	109.65	83.481	83.298	91.91	93.048	140.46	106.78	99.478
94.57	96.72	105.83	98.616	122.07	102.46	110.48	107.87	106.44	99.359	117.08	119.47	131.48	99.478
98.715	126.56	107.1	139.97	130.02	136.44	140.68	128.19	131.88	127.44	99.921	140.12	115.59	120.69
65.325	64.676	97.294	88.307	117.35	83.13	112.29	85.44	88.665	59.733	83.837	78.439	77.146	72.926
117.7	108.93	106.48	117.78	146.63	96.646	125.82	138.84	97.421	114.46	131.65	133.35	109.25	124.75
107.97	75.891	106.73	86.103	97.777	96.646	109.56	105.01	100.56	74.62	79.989	68.503	101.4	71.591
106.8	102.93	107.07	129.99	94.054	127	111.89	154.4	155.25	75.737	78.24	104	96.242	92.849
180.52	280.58	212.98	251.8	215.98	262.4	219.64	262.55	242.6	230.1	277.25	273.68	248.74	244.21
173.87	265.59	209.57	237.13	202.49	230.08	204.78	229.11	189.99	230.1	277.25	273.26	241.3	244.21
173.87	199.64	203.8	172.14	178.83	201.15	204	188.77	205.9	146.71	193.01	167.67	207.1	157.17
159.77	109.08	164.22	109.15	107.51	111.73	127.17	127.92	152.91	98.492	108.21	96.121	120.47	92.385
195.89	209.12	185.87	189.03	173.73	148.04	157	200.62	216.18	236.18	218	198.21	252.25	195.16
247.7	146.66	203.77	156.9	162.04	151.52	188.18	139.48	133.46	182.34	148.68	170.47	130.86	181.68
121.24	112.53	130.42	117.33	127.06	121.74	113.06	114.64	122.58	139.21	126.7	169.79	130.32	150.03
52.329	77.107	59.892	59.889	81.854	54.66	57.391	63.573	79.294	79.307	110.43	101.67	93.882	83.003
102.59	72.822	80.619	68.207	81.854	65.147	77.1	57.63	69.659	66.486	92.534	54.825	89.104	58.231
133.75	112.63	160.2	117.8	217.01	101.72	167.95	75.753	71.779	141.79	134.72	142.35	103.48	139.62
99.73	117.58	150.11	118.46	196.71	123.31	153.52	97.487	67.871	123.34	74.389	122	73.688	110.23
72.811	90.853	84.377	105.52	87.11	94.086	83.313	105.63	81.175	86.138	69.502	82.197	68.977	82.075
46.981	36.658	40.772	48.447	44.459	31.385	43.74	27.388	26.158	43.031	34.161	50.797	21.142	46.266
42.768	28.787	38.57	39.19	35.775	26.122	36.782	19.217	12.321	28.686	24.552	38.495	18.764	31.632
35.463	24.172	44.217	32.334	35.775	18.083	36.782	21.308	10.849	20.825	18.395	32.882	15.532	28.959
28.372	17.415	35.62	17.864	29.791	16.096	28.301	11.217	9.7516	16.125	14.872	14.139	9.2809	16.703
38.837	19.548	35.62	16.811	29.791	15.506	27.851	12.855	8.8234	19.745	14.731	33.283	9.05	20.254
21.965	21.061	23.997	20.163	24.513	13.984	26.722	22.983	14.384	19.745	14.483	23.376	10.573	16.496
27.22	18.749	21.2	28.84	17.8	11.896	17.283	12.85	13.898	23.416	14.483	24.173	10.772	23.513
36.439	27.608	38.189	22.615	31.969	20.729	36.374	24.001	12.535	24.904	21.788	32.18	12.73	26.482
31.77	23.248	32.916	30.424	27.223	18.65	29.107	27.983	16.086	21.218	13.529	18.882	10.261	17.486
24.502	18.993	24.34	24.763	17.613	15.715	19.354	26.764	13.064	16.445	13.529	19.013	9.7934	15.584
19.87	25.601	21.147	25.707	12.979	26.652	19.999	18.459	17.437	24.382	20.508	25.85	12.946	24.322
19.048	15.801	21.147	24.498	14.721	13.625	19.218	11.724	11.926	16.32	12.807	17.729	9.109	16.096
12.211	14.054	13.73	21.703	11.63	12.102	13.289	47.962	15.128	10.935	14.574	13.447	8.4967	9.5456
19.981	16.819	17.596	25.393	18.817	14.284	17.721	46.638	15.128	20.288	15.502	23.957	11.247	16.761
25.593	15.976	20.157	24.179	14.268	14.871	17.158	20.616	11.257	15.484	15.502	17.97	11.247	16.761
37.136	16.258	23.644	22.022	15.175	14.279	17.453	11.339	15.575	15.651	17.991	20.049	14.921	13.703
17.877	15.092	21.093	16.663	15.175	15.518	17.453	14.102	13.466	15.702	15.083	13.027	11.054	14.66
28.773	22.801	32.422	23.954	30.456	21.332	25.201	33.581	23.932	22.041	16.7	21.073	13.852	18.589
39.44	64.214	74.223	68.596	73.884	60.282	64.238	54.184	35.394	60.52	49.667	50.067	38.559	56.601
27.243	52.361	39.99	42.592	35.931	53.414	38.859	41.87	35.41	46.451	49.667	29.374	38.559	35.711
46.988	47.62	48.82	48.206	37.73	46.746	42.233	44.788	34.202	52.827	43.504	35.921	42.001	41.725
25.728	40.637	39.338	38.892	31.387	39.032	34.14	39.157	34.202	43.598	43.504	33.12	42.001	33.685
52.036	113.88	93.619	109.22	105.45	91.25	104.16	76.225	59.671	108.51	98.957	121.41	79.211	98.097
46.396	83.819	67.863	87.478	77.706	69.912	80.264	78.529	46.304	84.589	70.616	85.953	44.293	97.81
73.689	72.598	84.715	75.98	73.081	66.239	87.322	48.856	45.464	67.911	56.878	74.722	38.296	74.889
89.036	54.595	69.492	57.23	61.924	57.706	70.433	53.676	70.466	44.596	61.214	54.442	64.172	47.934
36.727	53.662	37.968	58.729	30.421	57.706	33.951	63.45	48.463	46.465	46.242	124.38	35.702	40.623
63.973	64.423	77.416	62.529	72.367	65.643	73.054	64.422	62.825	71.095	53.347	69.938	52.002	62.334
39.107	72.222	64.188	76.142	67.479	95.29	71.401	85.914	72.854	73.405	60.929	73.242	50.405	76.373
84.509	70.612	77.157	73.209	61.464	81.247	64.054	90.385	128.04	80.252	86.94	69.143	93.309	72.735
74.337	57.72	77.157	54.193	58.295	58.026	65.044	71.158	79.622	60.625	77.119	69.143	97.143	61.309
109.01	60.866	103.84	73.218	96.117	71.718	99.834	72.385	85.623	50.847	41.599	68.844	58.448	65.104
121.24	74.726	102.56	87.137	137.78	96.831	117.17	88.721	77.808	62.358	68.374	81.641	77.531	69.389
121.24	109.35	156.12	122.01	159.12	127.33	149.4	118.51	97.822	74.068	86.064	74.451	83.08	85.753
201.44	163.69	199.19	133.48	184.73	127.33	194.43	147.13	150.16	161.63	153.7	167.15	166.45	147.99
108.46	114.02	111.5	126.88	82.447	122.86	98.712	131.48	162.74	119.07	104.21	110.02	121.95	118.34
127.84	122.58	132.8	145.47	95.78	119.21	126.74	158.71	133.38	119.07	86.346	110.02	98.109	118.34
99.365	173.78	99.258	148	133.62	154.44	108.88	193.94	180.29	177.57	201.08	166.97	188.1	178.32
91.092	110.01	85.759	100.09	108.08	87.053	94.423	132.01	134.36	116.58	116.23	118.26	153.55	117.29
86.871	63.217	63.242	69.059	43.492	54.599	51.996	73.957	73.921	61.042	61.469	66.343	59.068	72.229
75.514	71.89	102.92	69.889	112.66	71.954	89.414	54.907	53.693	71.378	68.905	100.72	59.068	75.612
106.72	156.55	137.01	140.98	138.29	139.59	150.58	104.84	93.41	163.97	130.33	190.2	110.78	181.87
81.995	93.335	66.595	73.727	65.289	79.885	72.555	72.755	100.09	83.657	97.114	63.902	121.33	75.331
168.13	108.58	140.82	135.1	97.849	117.14	137.98	118.06	169.49	84.179	133.78	57.178	144.67	74.539
95.656	194.82	152.46	174.87	163.33	188.55	170.55	178.73	179.93	176.52	156.27	180.06	127.12	168.03
93.469	129.95	73.168	102.98	88.84	127.22	84.535	158.29	145.25	118.55	106.03	108.11	120.71	111.5
67.331	95.799	73.168	100.99	88.84	104.35	84.535	103.78	119.26	91.014	106.46	73.533	146.08	76.321
86.147	55.31	58.984	51.251	54.479	61.61	51.693	62.766	71.268	57.439	57.098	73.533	78.988	63.146
99.676	87.608	76.732	80.358	93.207	81.588	67.576	82.204	90.137	98.303	117.83	93.661	121.51	87.992
80.551	108.53	86.836	104.01	103.13	101.05	97.109	104.71	110.75	106.41	115.89	105.23	128.36	105.47
120.16	116.15	94.54	97.405	113.72	95.718	104.96	97.457	106.99	117.48	135.22	139.71	129.01	124.95
101.44	52.566	85.36	54.206	97.127	47.723	78.81	63.935	82.212	52.833	47.263	59.918	61.126	54.127
75.805	65.404	65.085	78.213	74.798	70.231	59.88	89.134	100.35	59.903	56.542	62.926	82.659	70.007
100.2	82.068	166.84	104.53	175.56	96.688	185.57	61.6	54.279	70.475	47.17	139.44	24.676	92.937
66.648	104	102.39	94.612	148.67	90.685	113.58	45.002	55.083	88.27	78.54	110.2	61.961	100.24
123.96	105.08	126.03	112.59	166.58	117.39	106.9	93.458	76.725	83.278	65.047	92.233	59.899	90.773
123.96	141.21	153.96	130.43	129.15	133.82	133.07	176.63	139.76	113.52	119.52	101.37	111.01	100.16
148.33	232.81	188.03	207.79	205.29	170.83	175.28	182.96	155.84	272.64	266.5	267.82	246.01	285.7
211.97	124.29	186.8	102.05	136.23	107.48	143.17	124.71	109.96	134.06	129.76	148.97	150.86	142.22
114.06	229.94	100.65	180.76	134.21	176	133.71	174.06	221.06	244.88	229.81	252.87	255.69	256.4
92.748	104.93	93.178	99.454	92.847	96.652	98.876	102.6	106.4	100.07	101.03	107.84	101.07	110.86
92.748	91.285	80.166	79.922	91.855	88.09	89.284	86.79	99.227	100.07	86.496	133.94	87.645	117.54
271.68	268.67	283.17	240.09	258.23	233.94	261.72	227.04	243.82	250.73	267.94	255.2	278.16	255.49
222.5	125.94	203.97	122.96	162.23	116.83	202.1	108.1	127.1	127.04	140.65	167.73	151.02	148.27
133.83	144.25	186.85	162.04	172.56	155.41	183.93	136.95	121.66	132.21	109.06	126.15	125.75	125.86
88.34	114.1	97.585	99.726	85.325	107.41	85.341	129.74	121.66	115.14	137.94	92.409	126.49	107.51
169.23	136.85	144.33	128.22	103.02	143.49	115.14	173.25	175.92	136.09	178.24	140.65	211.01	125.17
123.23	75.827	117.38	81.043	92.825	88.942	105.65	91.809	135.82	57.114	85.426	79.724	116.68	62.811
130.24	134.3	118.41	152.56	118.25	153.5	116.52	151.4	156.52	135.51	163.85	110.68	164.54	123.76
159.39	134.3	118.41	126.53	118.25	108.93	101.66	137.87	145	135.51	150.44	141.36	159.9	126.66
74.554	108.29	114.7	108.25	101.72	103.21	100.99	126.43	138	113.78	124.19	97.098	134.02	109.72
76.941	71.513	52.771	72.26	48.084	80.775	58.615	95.978	97.122	70.701	86.944	64.414	93.432	58.075
174.06	76.253	179.96	80.811	119.72	68.785	153.24	77.441	89.423	83.863	80.487	101.71	85.607	92.979
169.62	215.84	203.06	214.61	184.74	198.37	210.9	188.65	175.5	205.97	245.39	197.21	206.77	220.32
189.69	262.19	247.97	238.36	254.43	246.66	263.01	214.67	220.51	240.73	279.7	254.46	227.16	255.28
189.23	107.12	174.67	104.59	141.82	110.48	150.96	113.63	145.54	97.903	100.3	106	101	92.684
187.68	128.64	182.58	124.77	154.86	142.56	150.96	143.71	148.85	151.25	155.16	189.01	126.07	154.36
107.45	161.07	118.37	122.94	122.86	131.07	123.11	170.42	167.43	165.54	189.39	198.1	199.84	155.74
186.01	207.51	198.54	185.92	177.2	194.62	194.55	192.8	185.48	232.45	274.94	222.78	235	225.02
152.67	198.18	148.18	162.36	141.51	156.4	142.63	158.88	183.9	180.3	209.61	186.05	215.8	188.18
130.14	95.956	108.97	95.259	110.75	91.171	103.56	123.08	144.92	83.605	85.164	89.873	119.46	86.602
99.6	115.67	102.02	103.8	83.09	106.07	111.75	106.91	140.88	144.88	170.88	119.91	159.45	128.55
104.34	146.83	147.05	126.27	134.47	140.66	117.71	126.41	127.93	144.88	177.88	148.47	155	128.55
191.44	162.94	175.11	126.27	134.47	150.53	166.81	126.41	127.93	154.88	163.59	140.23	155	155.52
124.09	99.162	127.87	120.56	103.85	114.56	115.3	107.6	99.785	92.317	87.921	79.731	101.38	89.767
166.97	114.15	137.81	82.913	105.2	94.125	117.62	94.255	95.472	130.25	133.15	158.36	121.66	142.82
100.25	112.96	95.705	106.14	104.17	117.38	109.47	113.33	103.22	83.333	92.292	94.729	92.076	95.375
129.7	170.72	140.77	153.05	170.01	154.28	167.93	114.48	89.719	150.65	152.14	171.55	116.8	160.82
62.794	167.84	115.71	153.05	147.55	147.37	138.64	147.62	178.97	150.65	158.37	171.55	188.79	160.82
115.1	96.244	79.767	88.136	83.703	97.955	70.246	127.97	144.7	100.93	126.07	91.054	176.49	92.064
146.73	69.494	120.15	74.505	75.665	82.106	89.784	112.74	92.462	78.438	69.834	72.025	68.303	63.237
109.8	109.25	103.6	97.642	109.27	84.88	102.42	102.96	102.67	104.63	94.83	148.16	110.37	98.297
109.38	125.02	112.45	123.9	108.3	118.05	105.08	97.965	87.289	115.91	105.2	121.8	107.69	118.29
109.96	111.79	131.09	118.08	77.582	126.56	117	102.64	117.56	99.654	104.85	123.22	99.4	101.23
147.94	87.819	176.18	92.093	133.3	102.66	150.47	77.726	86.013	89.412	88.794	107.84	99.4	95.798
147.76	118.77	111.41	100.77	119.29	108.59	112.85	110.03	128.82	141.8	112.32	146.07	108.75	144.28
79.821	99.669	101.41	106.61	126.35	91.12	108.66	93.745	86.708	90.397	93.103	102.52	95.443	99.72
135.91	74.262	126.19	66.195	130.86	69.031	112.93	59.76	81.7	88.182	69.973	107.7	73.733	92.816
95.92	68.403	95.592	81.692	96.679	83.047	100.44	109.06	101.74	70.38	67.376	70.59	80.448	67.039
135.5	115.87	150.69	130.42	150.23	131.28	158.24	111.59	103.87	105.15	105.24	91.602	118.57	93.237
135.5	145.73	132.13	139.15	132	118.95	143.01	118.27	115.41	137.86	121.35	127.45	145.95	117.33
157.37	193.21	164.68	175.76	165.4	182.87	183.02	186.29	181.39	194.71	169.49	153.48	176.41	179.26
120.14	193.21	185	175.76	187.61	182.87	172.63	198.66	182.8	157.16	169.49	144.78	191.89	166.9
120.14	200.59	162.91	192.18	172.56	215.75	160.69	204.66	229.94	164.31	212.38	139.71	223.54	156.33
148.04	166.29	140.86	126.58	154.35	134.28	142.99	141.55	155.44	195.24	166.92	218.86	124.4	182.76
77.257	86.706	121.69	100.17	114.8	91.115	139.9	95.06	114.38	84.777	84.331	73.53	116.56	76.674
98.356	137.24	126.38	143.73	106.26	143.67	120.93	160.72	163.11	112.38	150.7	131.4	207.43	97.608
150.59	134.72	112.91	111.99	89.281	121.62	110.06	145.62	156.88	145.96	172.03	138.17	190.52	136.65
102.41	125.1	104.58	108.04	111.12	111.74	95.903	114.34	144.04	145.96	145.73	129.9	163.98	136.65
98.042	143.69	113.2	123.36	133.92	111.74	111.17	126.93	143.79	158.51	145.73	156.18	163.98	151.49
97.563	116.59	111.32	123.36	111.66	117.48	116.75	118.9	122.44	98.025	133.36	118.16	139.34	89.683
119.94	138.84	123.31	151.89	138.35	124.97	128.45	167.08	151.12	137.5	162.57	123.87	148.55	129.65
76.998	96.589	89.192	92.063	108.5	92.7	103.07	104.5	131.73	87.284	120.35	90.94	139.06	83.213
66.473	65.421	48.453	56.871	50.769	55.604	40.646	83.916	89.864	67.317	74.912	85.443	88.297	63.92
85.679	126.53	102.56	110.75	112.29	120.5	96.314	98.655	99.893	132.96	131.62	140.41	128.15	139.82
128.72	187.63	198.16	175.13	180.76	167.2	191.57	139.31	112.11	174.03	139.19	243.22	137	202.19
228.85	134.98	190.28	103.33	149.44	106.01	166.11	99.528	138.12	119.2	130.67	128.04	132.88	122.01
224.67	190.07	166.95	168.78	150.14	154.57	178.45	197.1	182.1	205.34	239.15	213.62	234.86	199.87
252.24	243.08	255.29	202.52	231.82	218.27	242.73	222.35	238.73	221.98	222.92	259.35	229.47	217.11
150.05	145.97	151.38	119.62	139.9	119.12	114.33	123.95	121.3	159.48	178.03	167.98	222.97	174.41
142.3	69.574	121.4	103.65	84.058	106.38	128	90.865	93.335	58.705	81.385	56.839	124.02	60.094
110.1	120.75	147.4	139.86	137.45	143.52	155.41	135.77	121.5	113.61	112.92	118.28	124.02	119.01
138.01	109.8	159.75	135.87	142.52	135.59	142.23	136.59	137.54	109.65	110.66	82.577	122.03	106.47
114.82	102.4	92.867	75.386	83.908	79.014	80.607	103.03	126.91	104.85	119.82	94.445	135.23	92.031
95.009	104.23	101.4	109.31	99.475	108.08	106.33	115.6	144.58	94.367	112.09	120.67	129.49	92.227
120.98	161.13	154.35	151.12	150.25	164.22	152.67	167.31	168.09	157.95	135.21	161.34	142.29	170.49
100.01	99.58	151.04	92.401	123.73	104.3	134.83	85.854	85.373	112.63	142.5	117.78	93.477	116.32
81.161	89.955	116.08	92.401	109.26	108.95	118.86	100.22	85.373	100.21	97.833	114.96	94.042	106.05
133.63	74.468	93.585	85.342	91.402	92.395	77.571	113.15	73.088	72.358	93.14	89.961	64.926	77.446
132.38	107.39	100.65	130.85	111.63	94.813	114.38	90.852	73.088	95.185	70.393	111.11	69.199	103.46
67.808	60.556	63.945	67.239	84.454	69.855	75.717	75.466	81.205	45.794	60.043	47.895	64.154	54.451
71.011	90.025	103.63	65.098	74.219	67.598	82.518	91.297	125.56	78.84	99.556	96.1	64.154	89.594
71.011	51.638	61.456	48.907	47.856	39.593	50.342	42.941	37.836	58.697	49.219	55.455	33.665	50.988
34.558	16.909	19.538	20.374	17.82	12.527	16.937	15.719	10.13	24.591	19.958	31.258	13.444	24.896
25.999	30.474	27.466	25.601	27.783	24.98	28.663	25.539	12.709	36.348	33.056	42.858	18.981	36.097
27.958	26.608	32.197	25.601	22.91	25.7	30.095	25.539	25.601	29.7	21.977	16.733	18.981	21.108
28.668	17.296	24.544	18.73	16.849	13.327	21.029	29.911	13.399	16.14	16.507	16.733	12.068	16.547
40.742	28.744	40.345	29.29	31.501	23.433	39.442	33.33	34.463	26.912	28.983	35.252	29.602	29.68
61.893	92.662	112.86	76.569	93.319	77.56	90.554	72	48.962	86.472	86.917	72.058	69.187	85.465
62.142	104.29	119.94	89.095	100.08	93.928	96.885	72	56.418	103.89	98.286	72.058	71.601	94.055
33.398	75.317	98.994	74.029	66.534	63.206	69.757	53.711	42.121	70.772	54.655	44.6	45.098	58.708
48.795	140.35	187.31	118.67	156.25	109.47	149.22	95.061	70.768	118.94	96.226	98.203	72.801	125.32
48.345	52.264	71.256	46.375	47.937	55.583	53.54	50.959	37.221	45.382	45.364	48.662	37.423	52.849
49.544	55.901	58.448	48.545	35.892	52.824	47.997	48.693	38.014	54.529	41.774	47.22	36.665	49.99
61.557	88.86	104.54	87.585	106.11	91.615	98.258	98.819	73.419	72.384	115.55	112.5	118.73	98.385
78.005	110.67	113.26	126	106.11	122.66	126.6	123.89	125.97	99.875	94.391	95.823	95.415	95.929
81.185	53.395	77.966	55.349	83.19	56.459	74.843	78.946	77.312	57.296	56.094	55.07	67.946	55.266
131.73	74.922	84.06	66.993	55.435	72.707	89.517	129.35	113.38	84.584	87.269	65.597	100.87	65.634
55.074	48.5	67.797	66.993	55.435	72.707	71.061	71.716	67.727	35.203	50.99	22.355	53.001	31.033
62.455	77.751	124.28	85.019	97.047	91.557	106.42	71.716	78.55	64.234	58.157	74.687	51.261	66.902
122.66	178.37	205.27	165.86	152.02	149	177.53	167.05	141.32	179.53	151.92	146.85	152.41	155.01
91.843	133.09	152.08	108.26	134.16	115.9	130.12	97.497	78.907	134.42	99.991	124.63	92.584	136.48
121.63	140.46	152.08	113.35	143.86	119.66	130.12	116.7	100.26	116.25	111.03	127.17	83.022	126.42
82.301	120.93	129.52	105.54	121.56	107.05	104.56	85.884	70.697	112.04	97.015	127.17	71.863	126.42
82.301	133.3	129.52	109.99	113.27	107.61	104.56	93.879	81.147	125.25	113.97	114.79	91.124	128.34
42.544	75.395	98.237	67.077	79.277	55.828	74.311	54.616	45.263	60.731	66.485	59.267	51.309	65.625
46.347	71.881	108.26	62.046	74.631	53.067	78.748	50.027	49.253	61.567	60.409	55.797	39.375	57.486
53.458	119.82	180.88	108.34	120.38	95.939	130.45	88.262	75.975	99.759	93.811	91.48	65.81	99.608
37.38	84.297	100.64	72.518	85.946	70.809	94.629	52.343	39.897	76.375	61.813	89.436	39.925	79.772
33.969	65.172	95.315	64.152	66.737	65.596	76.707	52.343	38.546	61.541	50.439	210.2	37.621	66.716
30.657	64.229	95.315	58.92	65.085	55.303	73.75	52.572	41.105	61.541	44.398	44.47	40.66	50.253
51.701	64.229	80.104	68.617	78.653	55.303	66.036	47.253	33.999	61.477	48.404	46.039	39.675	79.184
38.55	74.698	81.944	76.007	79.342	60.617	75.8	66.849	37.364	70.41	64.965	65.948	47.086	73.976
41.245	73.995	55.241	65.473	58.307	61.981	64.762	61.807	49.245	60.69	68.943	53.337	49.406	61.402
50.209	76.685	58.255	71.354	70.543	66.607	50.101	70.431	95.074	80.353	80.349	63.622	72.634	69.309
63.761	89.595	116.94	111.23	82.841	117.35	106.59	98.728	95.074	100.29	90.096	78.84	81.485	91.123
87.335	121.92	142.7	113.61	140.89	115.02	154.57	110.44	117.04	109.82	92.243	97.402	108.19	99.756
54.874	139.1	111.49	117.88	122.51	128.46	107.49	117.9	113.17	141.84	131.05	152.17	125.71	142.49
53.835	81.776	86.322	93.816	93.975	96.75	88.515	88.024	68.203	78.331	81.483	67.914	82.116	74.154
70.163	119.28	99.96	127.87	98.359	135.14	119.19	118.34	121.14	116.78	91.441	147.84	90.559	112.43
93.79	178.37	197.17	205.19	152.76	206.32	179.73	166.66	183.55	170.54	157.17	134.95	143.56	154.44
79.515	174.09	197.17	183.24	218.5	184.1	197.32	178.3	175.99	145.69	152.29	162.74	143.89	158.6
93.594	161.72	134.68	165.1	125.7	186.1	154.94	178.3	179.8	146.91	162.3	123.6	187.7	131.74
96.862	143.13	147.77	138.68	125.7	136.83	144.66	126.15	129.48	146.91	162.3	134.26	173.22	140.4
151.99	175.09	165.07	154.21	145.3	169	174.2	165.51	189.6	177.33	178.36	180.01	208.68	163.95
57.205	150.09	97.716	122.92	134.99	141.92	109.21	148.91	136.86	153.81	168.81	166.03	178.64	154.92
69.464	165.97	79.18	162.51	78.201	180.92	82.735	163.64	152.71	158.29	162.43	146.88	155.28	157.92
104.27	165.97	196.66	176.04	146.32	180.92	190.4	166.94	152.73	165.02	156.46	154.51	159.45	178.24
73.732	115.11	58.618	98.446	104.23	79.927	65.951	76.375	80.137	131.79	110.08	154.28	115.06	149.83
60.547	136.32	101.82	130.16	104.23	105.76	101.83	117.78	113.98	144.89	154.61	134.94	150.62	142.36
123.71	146.84	160.92	145.39	152.35	150.61	161.53	117.16	113.98	113.85	120.12	113.64	94.206	121.29
133.99	175.37	155.23	179.05	132.85	188.83	167.25	161.45	176.43	150.7	173.11	146.77	164.69	158.95
120.61	152.72	204.23	168.59	189.66	172.34	202.96	180.4	183.01	124.84	135.88	125.22	175.59	126.75
49.192	109.74	109.59	110.72	103.89	118.16	88.658	130.31	154.7	117.49	110.44	74.956	122.87	101.24
84.941	99.254	92.34	102.53	83.098	118.16	98.087	130.31	133.05	101.16	101.58	81.108	114.45	103.55
64.964	82.868	109.93	94.172	97.106	106.26	118.49	96.482	78.896	96.133	81.582	71.104	97.782	89.228
87.772	82.296	109.93	76.46	123.19	73.308	92.976	76.152	70.526	88.78	85.883	103.3	74.285	91.447
105.48	113.04	125.54	125.49	141.46	130	118.69	109.1	125.51	102.08	93.196	117.15	99.468	104.75
107.2	113.06	106.21	119.43	115.95	120.29	100.14	120.1	110.93	113.56	95.281	96.562	96.33	106.71
84.498	113.06	88.287	107.68	93.685	119.58	89.261	134.87	147.9	94.628	95.482	95.359	113.9	105.99
96.492	146.68	97.992	154.77	93.685	160.36	91.836	164.23	163.84	137.28	144.06	117.77	128.53	134.07
99.615	136.86	111.56	121.41	102.43	135.17	94.152	137.53	127.97	137.28	142.11	115.92	118.5	134.07
73.428	103.75	126.55	98.173	118.16	86.36	124.02	61.981	53.46	98.83	72.823	87.369	63.843	92.073
44.976	96.291	126.55	70.077	118.16	68.237	110.69	55.838	47.744	95.281	72.823	87.369	60.501	92.073
97.096	252.02	172.73	221.41	214.93	222.96	213.85	227.1	232.49	233.09	263.02	246.34	235.58	228.32
43.348	96.398	127.48	98.971	107.05	88.274	92.943	91.995	75.701	94.945	101.07	122.35	100.67	104.23
60.446	126.2	125.25	114.34	123.31	111.89	112.32	121.43	128.07	120.64	116.29	144.7	103.84	115.52
88.79	96.339	128.53	89.634	104.32	96.008	112.32	84.729	94.198	92.442	98.487	105.67	96.606	100
103.61	99.63	88.785	95.517	82.23	93.548	84.835	121.65	108.73	113.7	86.226	107.69	84.773	121.74
117.38	102.21	106.06	105.07	97.868	105.59	105.72	121.65	114.54	113.7	115.19	109.27	98.067	110.67
110.73	89.315	134.08	85.894	97.868	92.414	114.9	80.363	99.891	101.66	119.8	112.37	119.25	104.22
147.3	71.92	127.08	65.701	92.191	66.723	84.943	66.203	87.783	70.528	75.497	83.98	101.81	72.689
55.353	93.412	99.656	100.2	99.967	103.48	94.097	104.93	99.472	90.224	101.79	97.271	110.87	93.595
111.95	120.14	151.23	147.28	133.58	147.7	157.47	113.92	96.963	115.33	101.79	122.34	104.94	126.39
108.92	75.212	119.78	80.113	83.506	81.653	107.78	62.518	60.215	93.464	88.928	88.01	69.85	93.269
134.37	120.72	138.16	126.5	100.54	121.11	113.78	104.75	120.31	128.38	147.87	169.69	133.57	128.5
123.39	121.48	138.16	126.5	134.33	119.91	136.52	101.81	108.14	110.01	89.295	150.89	92.199	121.59
76.452	123.3	85.83	132.65	84.579	135.41	102.81	136.96	132.27	106.44	116.56	101.83	152.65	99.126
86.497	89.189	117.58	90.847	121.14	96.924	110.12	94.029	108.82	77.174	97.222	71.75	94.139	69.866
147.02	118.41	135.09	115.76	124.18	123.62	123.78	97.214	90.312	99.217	95.782	122.72	76.258	116.61
92.953	73.09	102.76	85.703	85.343	110.42	93.121	89.028	96.715	66.434	57.972	66.159	74.729	70.433
102.02	73.09	103.42	85.703	89.219	76.674	91.743	116.5	131.78	74.445	57.144	68.83	75.87	68.403
103.37	91.08	178.62	97.342	149.31	101.94	156.77	64.872	60.692	88.255	86.766	102.92	69.156	100.75
68.572	145.23	120.86	141.54	124.45	135	122.47	117.89	119.38	127.6	127.67	147.07	139.03	141.43
114.04	95.551	103.53	96.384	76.075	106.73	98.135	115.09	141.78	89.15	114.82	61.777	149.25	71.948
85.149	178.65	92.83	141.67	101.86	156.96	105.82	146.4	153.56	185.77	209.71	182.97	215.36	182.09
127.82	223.86	132.86	167.63	152.6	181.01	165.61	160.56	153.76	224.22	252.63	222.74	215.98	242.33
104.07	151.2	116.05	153.91	122.29	162.55	128.61	143.04	169.66	139.66	174.82	162.86	222.43	138.97
147.91	160.24	116.05	139.63	137.79	148.39	123.63	163.34	180.63	185.19	140.77	176.56	153.55	173.8
103.27	108.63	81.869	103.9	87.075	106.58	94.7	118.47	125.09	97.352	101.94	121.82	118.66	90.241
94.445	104.75	63.064	97.345	61.217	101.99	77.701	113.01	117.33	72.369	89.823	63.61	96.295	66.968
87.756	98.758	87.478	103.71	96.446	101.41	95.761	100.1	111.5	94.614	94.063	99.043	78.74	91.588
76.684	103	74.301	91.864	79.067	85.396	82.677	91.61	83.876	122.33	107.95	126.13	87.417	119.41
76.684	123.98	68.431	109.19	79.067	105.15	70.128	109.62	132.84	125.27	138.36	126.13	100.26	148.41
95.133	85.007	90.595	84.49	136.92	88.146	99.147	86.921	103.69	75.356	89.864	87.282	107.01	85.493
91.658	112.52	96.308	104.83	105.13	102.43	97.934	127.84	112.14	124.73	137.86	204.98	141.17	128.9
91.658	136.84	187.68	136.59	164.84	144.24	161.73	121.08	117.36	110.96	91.164	176.61	95.501	115.94
116.14	110.46	93.992	89.185	75.663	90.529	102.71	121.6	141.21	110.86	116.93	137.04	116.97	116.62
147.82	156.15	99.943	132.28	85.539	160.53	105.97	159.63	150.68	172.26	187	185.79	203.46	159.68
147.82	135.97	148.07	127.24	136.14	127.27	128.36	107.87	119.08	142.86	142.12	189.49	152.19	161.59
55.984	141.63	130.31	125.29	103	129.43	118.66	129.55	107.77	170.03	158.34	139.23	166.34	135.3
75.714	133.74	133.64	120.8	111.18	135.58	143.14	113.17	116	152.63	117.38	139.23	93.684	137.57
75.714	77.345	121.63	115.54	82.903	120.65	137.98	113.76	119.33	46.253	55.312	43.242	64.685	46.292
96.526	40.103	75.889	62.238	48.687	67.072	61.417	68.429	72.629	36.074	39.773	34.154	75.588	28.855
133.31	65.186	75.889	62.238	54.275	67.072	61.417	69.892	62.886	81.112	76.603	77.402	78.28	77.356
126.82	74.318	121.39	61.882	106.5	62.097	104.59	72.849	55.894	62.306	71.3	73.855	49.436	72.779
92.902	74.318	101.24	94.885	104.92	85.692	108.81	93.925	85.29	68.381	71.302	89.968	49.207	82.141
75.279	106.47	93.176	96.455	127.61	99.17	100.62	85.137	78.04	99.268	72.301	122.62	64.099	108.53
62.186	70.992	73.472	56.97	72.041	58.626	66.427	51.513	40.976	79.235	87.715	77.955	46.361	79.918
75.047	50.162	58.421	56.97	51.069	37.231	43.666	47.965	31.697	55.48	51.789	51.803	31.114	52.97
51.215	48.943	57.053	63.073	50.742	37.231	49.692	40.181	20.355	55.48	47.472	72.468	28.382	61.023
27.794	34.926	42.122	31.612	39.718	25.453	43.921	26.789	20.23	39.593	29.018	40.521	14.381	45.673
22.45	34.019	35.79	30.936	30.685	30.455	32.96	29.529	15.754	36.883	33.544	34.916	18.611	33.998
32.366	28.086	50.234	43.76	35.57	28.005	45.88	45.797	19.112	25.22	26.281	22.599	21.262	26.336
26.589	26.252	50.234	30.454	33.581	25.692	42.53	21.217	16.936	22.551	19.479	19.186	16.238	22.833
23.419	24.02	30.606	26.448	22.635	19.209	27.156	39.363	15.51	24.088	16.889	22.097	16.099	23.174
30.916	20.546	21.193	29.589	17.106	17.72	20.377	26.557	13.959	24.598	17.051	22.352	17.974	22.567
26.178	13.435	18.398	14.385	18.187	13.227	18.162	16.938	15.123	16.239	14.715	16.037	11.967	15.367
18.725	8.285	12.188	14.424	11.868	6.99	12.824	9.1602	5.2925	9.8176	8.126	7.7421	8.2509	7.2254
34.778	26.373	28.621	33.988	19.977	25.583	27.211	29.643	29.689	22.622	26.416	16.693	26.392	25.941
48.65	75.545	79.896	71.686	76.612	61.739	68.063	63.668	34.169	70.761	59.34	76.7	43.754	75.298
44.993	50.601	60.537	46.704	46.256	45.539	41.097	36.058	27.429	48.917	41.003	45.121	31.103	50.146
47.319	66.066	77.106	55.623	66.817	53.81	70.247	43.325	36.456	55.433	57.972	56.119	45.784	57.335
38.662	56.078	83.084	61.319	57.95	41.45	59.698	43.325	26.685	53.42	52.548	51.773	35.875	51.751
32.673	30.208	34.39	31.621	26.893	31.917	33.163	32.163	29.813	29.393	30.603	23.939	22.692	32.874
35.878	42.98	45.784	47.374	41.5	42.816	49.64	52.878	45.599	39.182	43.539	32.251	47.161	39.023
52.624	74.322	79.487	63.028	76.367	62.977	80.979	52.878	51.1	61.033	54.613	56.06	47.161	61.042
42.579	83.092	70.675	105.03	57.756	108.42	80.956	86.651	74.784	70.982	69.632	50.392	59.646	63.29
79.109	128.69	105.09	103.08	101.4	108.05	111.12	92.157	88.693	153.7	134.73	134.38	102.47	141.09
66.239	95.237	77.528	80.845	83.526	78.559	63.997	92.071	86.867	121.25	97.15	123.6	83.048	126.41
69.063	65.367	61.696	66.807	56.896	66.44	55.715	104.3	88.497	61.593	72.78	56.896	68.077	58.427
69.063	63.371	52.819	51.54	46.397	52.109	55.06	50.092	51.518	60.443	72.504	47.11	68.676	54.311
76.169	88.99	62.431	85.955	71.835	82.632	77.549	81.314	70.272	92.212	87.943	91.553	80.224	82.103
59.26	63.434	58.442	64.889	66.776	66.211	58.996	73.197	58.008	67.872	70.132	79.305	60.97	72.734
57.664	81.675	83.136	87.837	80.564	88.043	88.233	89.97	71.115	72.667	55.897	55.83	54.445	65.319
90.145	109.47	130.5	103.85	126.3	97.519	130.81	96.607	85.25	93.614	81.872	84.651	62.731	94.14
83.758	64.013	86.778	86.085	68.175	89.089	90.733	82.121	73.123	57.638	47.216	54.942	41.788	54.138
39.302	56.293	48.034	54.277	65.85	59.301	52.092	62.835	59.901	60.269	63.306	72.281	62.656	66.13
48.012	67.755	100.92	68.816	89.077	65.179	98.327	72.385	74.994	46.573	83.067	52.545	79.946	55.995
103.02	113.21	147.91	124.79	89.077	114.08	119.73	137.36	134.8	116.51	111.57	74.747	119.34	91.574
70.67	79.447	66.329	94.694	66.748	96.633	65.683	149.16	155.15	88.041	109.36	45.981	154.8	59.421
87.069	76.873	85.993	99.94	83.794	86.826	99.762	103.46	90.353	62.169	57.187	45.981	61.902	59.421
120.33	118.16	145.27	131.03	109.46	144.51	115.71	113.46	107.41	101.4	97.911	103.74	83.347	100.34
61.571	103.52	82.499	92.093	105.31	95.646	87.908	71.394	65.342	94.885	87.581	93.505	83.57	97.955
49.114	59.587	68.062	47.125	70.227	55.932	57.945	62.429	62.666	63.39	75.66	66.067	74.423	71.097
114.82	86.504	109.99	92.484	97	93.744	86.538	101.03	96.447	61.675	62.499	74.428	82.909	62.596
71.913	69.633	72.373	82.817	58.568	86.88	60.746	85.484	108.48	66.613	75.748	68.466	104.29	54.913
75.606	72.2	75.728	88.27	60.635	101.44	74.097	87.045	77.967	72.37	82.063	76.602	90.623	65.572
92.174	76.421	106.75	79.041	113.51	76.465	99.514	81.696	85.115	89.565	81.328	82.322	90.484	81.131
80.212	59.244	78.046	76.351	83.068	73.251	72.582	65.433	54.856	51.639	50.221	54.203	48.362	55.289
143.92	77.792	136.52	78.746	111.36	71.991	116.42	85.916	105.46	86.553	92.667	84.851	103.09	90.42
172.24	127.97	160.17	137.53	160.99	139.39	163.43	112.11	101.24	127.46	92.476	138.58	69.838	130.02
80.285	35.82	48.098	51.22	50.626	39.186	41.26	58.168	52.341	23.36	31.456	59.065	38.767	24.197
44.146	21.588	31.45	28.775	25.741	28.747	26.551	23.159	26.305	20.849	23.789	59	22.708	24.197
50.77	37.268	32.998	44.9	43.832	45.017	43.739	32.248	21.113	50.15	37.29	59.517	24.978	60.467
26.626	25.204	32.323	21.564	28.458	18.519	35.604	18.875	9.7014	25.951	19.202	32.414	12.414	30.843
33.802	25.204	27.987	24.779	29.369	19.158	30.513	21.682	16.895	20.566	21.239	31.279	11.999	24.591
25.005	25.106	30.274	31.45	25.502	24.927	30.513	23.312	15.3	24.473	28.609	27.434	16.952	27.513
26.364	16.471	21.096	19.303	18.697	14.468	19.021	16.724	10.457	17.293	13.608	22.242	8.6519	18.402
31.981	20.217	27.989	15.781	21.277	9.4446	19.916	21.253	16.697	21.988	15.938	16.504	11.848	20.71
14.207	19.723	27.624	25.961	20.791	14.291	18.985	32.563	17.207	16.348	15.615	14.518	10.607	15.53
24.876	20.25	30.326	28.744	23.463	14.556	23.409	28.187	17.633	17.731	15.009	18.694	11.134	15.223
16.477	20.391	30.415	17.705	21.47	16.543	23.934	20.567	19.051	19.359	16.604	17.34	16.068	17.363
18.426	18.742	29.147	17.705	20.887	14.231	24.755	12.379	13.101	15.307	14.729	16.033	10.523	14.957
13.733	18.206	21.704	22.262	18.534	16.686	23.863	17.685	12.335	17.648	17.572	16.659	11.83	16.06
12.943	10.015	10.795	17.668	8.7213	9.0352	8.2854	13.289	7.4998	11.596	10.88	7.5835	7.1778	10.322
13.402	13.044	16.25	22.701	12.831	12.943	13.229	12.301	8.2264	14.737	13.86	7.9313	8.2675	13.177
20.12	13.471	16.876	13.372	13.267	11.4	14.956	12.485	9.5238	14.179	11.759	15.892	8.6185	11.77
16.486	18.583	22.897	31.471	20.276	14.675	22.159	17.421	18.152	15.335	12.475	16.55	10.174	13.033
19.577	20.406	26.065	39.388	23.461	19.866	27.126	19.579	17.734	17.623	14.204	14.75	9.0132	18.556
24.429	26.256	37.175	36.587	21.631	22.39	31.073	20.545	16.364	28.978	25.281	24.668	17.734	28.524
28.03	26.055	46.643	24.208	26.18	18.261	44.742	29.441	19.604	24.967	17.999	19.083	15.697	17.418
22.512	23.376	29.861	28.009	21.435	19.046	26.182	22.667	14.172	18.901	21.307	16.595	18.935	16.966
21.629	20.267	25.986	30.214	18.769	19.046	22.922	24.313	15.436	21.158	18.846	19.475	14.516	19.841
18.664	16.161	17.727	18.582	12.925	12.411	17.78	20.875	12.478	12.418	16.405	15.573	11.982	15.963
27.615	22.483	33.766	31.504	25.189	19.873	43.119	16.264	12.966	21.164	24.426	21.691	15.969	21.351
20.545	17.701	28.924	16.122	19.082	16.038	26.06	13.283	10.104	12.947	14.097	13.833	9.1812	17.763
23.595	18.561	25.455	18.844	16.922	14.053	21.804	15.961	14.162	16.934	15.006	15.28	10.869	19.017
20.875	20.384	27.194	17.937	19.66	17.951	28.501	22.519	15.507	18.633	14.064	14.728	10.878	15.867
20.435	18.456	32.24	25.021	23.628	17.516	25.857	20.555	12.984	17.842	14.064	10.626	12.133	12.923
20.435	28.454	32.886	30.967	23.648	31.825	28.847	23.544	19.53	31.33	23.427	18.307	17.628	24.145
30.278	24.346	33.928	24.988	20.804	22.786	24.486	21.161	14.374	26.808	23.427	18.593	15.625	18.964
22.157	34.15	39.371	31.545	31.403	29.099	37.381	24.424	20.738	27.971	27.475	28.379	21.299	29.353
22.681	34.484	39.371	34.312	34.207	25.773	37.381	24.424	22.642	24.984	23.361	27.172	17.023	27.541
21.132	23.741	26.966	25.509	19.785	24.863	23.896	19.874	14.846	25.289	21.547	22.136	14.308	22.779
22.135	23.741	27.656	37.465	19.311	19.706	22.67	17.264	11.8	25.289	18.66	20.289	15.848	23.42
16.402	15.61	26.209	19.411	19.17	15.735	18.975	15.863	8.1789	15.929	9.5255	15.996	7.3077	13.226
16.402	22.843	26.209	19.938	23.272	18.353	22.191	16.776	13.823	19.712	17.647	15.996	12.72	18.277
7.9707	25.117	24.181	24.909	23.466	21.87	24.463	20.5	19.933	22.252	22.232	18.61	16.85	21.529
13.556	35.345	47.593	39.425	32.326	31.507	36.022	35.524	21.694	27.152	29.074	20.367	22.825	27.748
15.547	45.067	71.874	39.021	44.591	37.855	52.514	38.526	26.324	39.561	35.249	43.283	26.797	36.637
35.483	49.95	71.874	40.23	51.414	42.226	47.255	41.702	22.997	43.827	35.065	49.348	26.653	53.572
31.133	64.648	74.032	46.271	54.823	45.915	53.28	72.769	33.521	59.147	38.179	44.993	33.764	46.946
39.324	57.598	60.728	53.175	59.221	47.725	59.545	66.713	35.877	62.81	43.553	138.23	29.334	58.518
48.97	116.62	130.84	106.08	112.91	101.72	120.1	85.366	63.221	110.24	90.775	98.505	60.408	102.72
61.525	84.904	108.35	75.074	83.103	70.384	78.225	79.901	52.42	91.991	72.909	68.393	53.626	78.097
64.467	84.904	93.589	75.074	73.945	68.697	74.131	65.916	47.158	91.991	72.909	68.393	53.626	77.978
63.668	91.373	107.49	71.241	98.759	67.503	81.545	64.252	35.403	98.083	64.678	89.873	43.066	98.912
39.68	64.663	85.711	81.463	57.38	57.484	54.529	63.637	43.218	66.421	53.773	60.259	44.163	65.506
64.808	95.366	95.022	81.625	98.828	73.314	87.929	66.57	45.504	94.119	85.667	84.268	58.7	95.785
94.516	95.366	110.04	80.651	92.663	73.314	89.549	66.57	42.518	92.692	85.667	88.59	45.012	95.523
64.056	90.973	100.13	80.651	92.663	74.626	85.869	65.011	45.142	92.692	79.66	88.59	48.34	95.523
104.82	80.518	104.18	82.79	88.393	68.293	99.393	41.391	34.831	65.493	68.553	84.099	42.755	84.744
23.132	60.526	108.4	70.119	72.475	44.602	74.692	45.284	40.198	51.169	43.946	50.331	36.744	51.523
60.928	120.06	155.74	115.02	124.25	95.011	125.66	87.638	52.467	120.39	89.668	89.686	62.718	109.61
36.357	75.25	70.943	66.076	68.978	66.516	61.319	60.018	44.111	79.868	68.67	65.814	55.946	67.263
38.431	55.587	73.057	54.045	61.351	48.508	62.775	48.912	33.263	53.963	41.439	72.114	36.712	56.703
51.012	55.587	73.057	53.991	57.402	48.508	58.936	37.103	30.526	53.963	36.359	148.01	29.642	51.202
36.679	65.338	54.525	71.12	62.031	76.181	54.812	73.997	73.492	68.983	69.916	59.596	58.703	67.912
57.02	96.701	68.379	92.189	61.969	91.33	74.108	109.51	108.52	89.994	113.52	81.876	107.27	82.023
78.379	146.64	112.89	142.56	106.21	150	127.08	109.56	100.82	149.6	121.33	135.03	92.149	147.71
67.923	136.46	100.2	108.46	122.43	107.44	112.57	92.41	82.859	153.97	142.37	156.87	91.446	153.16
102.55	106.51	128.16	97.565	105.63	100.4	137.66	77.22	75.309	126.19	119.46	150.25	91.446	135.04
62.517	75.29	89.622	93.199	84.305	104.04	91.046	76.969	64.718	83.622	69.334	90.505	68.008	79.845
96.298	100.27	97.364	130.12	108.38	105.75	94.685	115.95	94.915	145.1	93.456	96.892	95.628	98.756
111.9	178.15	159.83	167.36	158.21	183.22	171.27	147.9	156.23	201.06	157.53	228.84	179.03	197.16
90.269	151.27	85.506	109.68	105.27	105.94	113.42	147.9	156.23	145.14	151.64	143.14	143.3	145.74
63.337	92.129	67.156	93.257	79.301	77.191	75.5	92.752	122.24	89.517	91.011	78.598	108.27	70.511
83.034	104.97	112.5	108.52	113.03	97.319	106.88	91.651	112.92	123.23	130.97	113.06	155.8	111.97
128.35	168.32	180.42	143.75	158.7	116.78	190.6	155.87	159.48	187.75	164.28	171.23	194.72	138.59
245.68	120.91	232.13	129.61	159.37	106.02	176.41	142.91	159.19	148.48	122.91	97.763	167.72	97.813
63.949	93.698	61.509	97.471	60.065	106.02	64.221	134.91	143.1	93.858	119.59	100	120.5	96.137
119.26	178.51	161.8	192.82	194.12	167.33	181.76	154.26	140.43	174.29	119.86	179.37	99.528	164.44
100.21	170.55	138.35	189.06	132.79	196.98	160.99	204.55	174	170.74	152.44	140.18	146.24	186.86
120.43	98.81	109.49	113.64	122.94	86.9	125.8	119.69	102.86	120.5	117.68	139.65	149.88	124.7
143.22	201.74	164.7	174.8	167.14	184.06	173.88	169	149.83	187.98	170.48	161.54	142.82	190.89
71.842	124.26	119.5	124.45	123.92	119.22	127.11	121.44	150	110.6	110.87	78.041	139.11	100.82
72.485	129.05	200.25	146.22	174.11	115.42	155.12	121.44	128.85	150.43	155.69	144.84	160.16	123.92
73.643	89.037	126.94	98.715	111.1	100.84	104.43	111.01	125.53	86.8	109.5	78.514	126.06	82.318
68.38	65.633	100.75	88.965	74.272	74.027	81.718	89.403	93.676	61.068	71.851	60.22	96.594	61.807
94.658	86.495	132.19	98.84	117.06	92.373	128.67	94.624	111.61	66.156	69.008	123.24	90.709	84.133
111.28	190.53	166.43	173.76	161.51	180.27	170.09	222.43	239.88	194.41	200.86	185.1	207.08	199.72
125.48	188.64	191.63	158.65	200.66	151.57	181.81	117.34	89.998	218.88	159.34	216.77	109.94	234.81
95.871	109.29	101.04	90.461	94.521	89.342	77.54	84.138	77.879	127.88	116.33	111.35	99.377	122.62
90.811	118.38	137.59	79.526	105.56	86.906	86.111	172.59	109.75	125.45	107.13	137.8	85.021	111.1
78.508	139	143.52	113.45	144.81	117.03	129.94	94.082	98.463	151.7	123.98	152.48	85.021	164.38
116.57	119.01	108.73	108.88	108.88	121.38	131.71	94.082	114.52	140.65	123.98	138.06	153.71	133.3
121.57	90.109	133.43	120.09	123.27	111.23	140.59	98.021	81.664	89.12	65.813	93.183	61.832	88.202
63.929	66.795	63.854	76.833	54.561	90.277	68.231	95.742	81.664	65.001	83.706	58.741	85.169	68.842
103.31	66.852	71.913	88.813	46.408	81.053	74.118	109.92	102.46	55.821	88.189	48.803	120.41	55.609
54.35	70.175	84.651	74.235	89.872	101.58	105.91	67.894	86.087	63.462	72.42	91.694	89.702	74.187
80.968	69.677	91.52	71.679	70.213	75.575	92.022	62.944	64.462	63.462	60.145	89.957	65.638	68.473
38.878	64.294	42.72	88.145	41.953	91.716	61.004	97.085	96.123	66.543	72.259	43.89	102.75	47.676
85.276	79.279	107.32	98.041	78.304	99.171	113.87	104.39	109.26	86.148	113.91	73.158	122.68	80.246
86.785	79.24	113.5	98.041	122.76	99.171	110.11	81.772	73.118	86.031	84.269	76.979	80.916	80.891
86.785	140.05	113.5	128.05	107.1	102.6	110.11	137.64	122.75	144.1	152.09	177.91	152.9	148.37
116.89	170.89	88.238	152.06	100.41	180.49	126.59	189.32	227.35	144.1	180.34	138.38	191.39	149.5
102.62	183.24	117.28	162.21	121	175.39	129.84	208.11	250.68	144.88	167.2	121.8	195.78	140.04
106.74	131.81	89.686	123.66	80.075	124.62	115.93	132.01	148.67	110.41	135.55	92.297	157.23	114.81
158	188.7	198.89	201.85	158.1	193.66	196.14	177.68	191.48	164.97	180.25	172.69	211.38	174.76
139.38	226.09	236.42	240.8	158.1	244.97	214.3	186.13	193.12	211	237.53	242.98	215.47	193.98
98.758	240.55	120.75	193.23	150.25	198.23	143.36	197.2	152.33	260.42	258.3	240.55	222.96	250.94
98.758	187.36	154.2	156.42	136.41	151.85	143.33	184.62	172.18	168.96	185.21	147.62	183.53	168.62
133.52	182.7	160.45	157.01	154.45	209.54	194.22	200.91	165.96	206.27	173.97	195	177.93	184.06
121.75	140.79	138.58	120.25	108.09	136.69	144.71	142.51	166	117.47	143.01	128.95	174.81	149.86
99.967	109.38	111.63	101.45	76.588	104.33	75.063	132.52	146.58	101.29	120.95	102.23	137.68	113.81
102.83	88.897	110.68	70.794	82.939	78.912	109.97	81.318	95.241	85.981	110.95	80.311	115.6	84.177
71.505	147.49	174.53	147.19	139.09	139.65	151.81	142.32	147.65	137.12	204.27	146.82	183.21	139.04
65.505	73.184	72.223	75.038	69.949	78.988	72.185	81.899	84.515	69.53	82.127	72.123	98.271	76.411
73.15	144.77	133.54	129.68	94.133	120.1	106.95	136.47	146.55	141.2	165.82	119.07	191.97	124.34
210.18	293.22	272.59	239.92	228.54	246.78	249.66	238.16	236.75	300.75	341.56	238.89	317.32	292.08
154.8	154.58	198.52	138.99	157.96	138.9	185.5	184.47	166.36	146.83	162.63	141.18	179.67	145.14
146.38	128.02	175.41	136.7	131.45	132.34	139.36	121.86	141.57	146.83	131.8	141.18	132.7	145.14
179.9	128.02	114.13	113.42	126.2	121.93	118.43	142.91	160.66	152.21	172.04	165.14	213.12	171.55
102.22	191.52	189.92	167.92	169.98	189.74	164.03	159.13	174.21	145.63	156.22	160.13	143.21	160.71
102.71	189.55	152.8	133.04	133.78	167.61	126.29	174.41	172.08	185.29	158.6	160.13	143.46	160.71
166.2	157.34	229.6	133.04	144.19	128.64	182.11	126.07	131.08	175.04	114.41	188.84	127.53	165.52
88.849	128.66	114.82	110.14	134.24	113.5	112.38	129.16	118.76	134.96	130.22	128.15	127.53	106.35
87.128	83.566	88.188	76.727	97.32	76.616	81.915	95.284	82.24	89.914	89.424	119.93	89.18	80.047
75.271	75.506	89.15	93.747	103.73	79.19	106.93	88.909	72.52	85.22	61.301	87.38	60.433	78.639
70.735	101.92	115.58	100.13	134.92	96.379	100.85	88.909	88.849	91.012	82.673	83.688	91.875	85.83
121.39	71.445	116.14	77.476	91.718	92.092	100.85	106.79	82.072	74.954	57.134	74.472	61.894	68.278
72.953	54.511	58.944	69.341	46.757	62.627	52.391	59.244	68.047	52.667	46.913	46.668	60.125	47.594
129.17	77.402	149.17	128.39	109.53	114.24	139.6	70.481	68.047	75.24	46.913	78.071	60.125	72.782
129.17	262.33	158.15	242.24	165.92	257.09	173.16	263.95	237.26	295.25	259.5	284.69	261.76	293.28
150.36	204.92	140.86	164.03	134.61	182.57	141.71	177.6	187.37	189.22	218.5	210.1	194.86	204.18
109.67	199.3	116.95	167.03	136.17	182.57	145.66	196.51	197.04	183.53	182.9	192.09	179.5	200.82
133.51	172.72	114.66	149.66	136.17	144.56	136.87	165.02	157.81	178.2	187.54	179.64	200.66	182.39
226.54	186.95	171.49	161.45	162.13	181.84	169.62	173.89	196	216.41	226.53	167.28	227.91	188.07
124.9	97.666	100.7	89.526	94.51	97.424	73.192	113.08	138.6	95.183	140.3	92.511	170.86	97.352
92.36	70.188	84.092	83.353	79.541	72.599	99.886	85.541	115.68	82.84	93.184	55.155	87.637	73.247
148.33	118.47	118.13	105.37	79.541	111.22	110.92	108.92	128.7	142.85	172.95	105.75	161.85	124.03
80.431	89.175	101.14	121.28	128.07	99.69	84.004	107.95	92.588	81.557	79.548	60.716	89.75	79.361
104.35	100.34	116.44	111.45	128.07	99.69	121.36	97.931	91.543	89.961	84.354	88.595	77.265	104.69
72.901	128.85	119.72	154.16	119.1	151.64	125.84	134.17	108.7	104.95	104.38	81.405	90.043	92.882
79.459	128.85	119.72	165.43	119.1	159.73	144.84	137.58	117.96	124.56	109.47	138.03	106.7	135.83
56.479	101.52	73.05	91.664	93.073	85.048	84.227	127.62	97.717	99.967	89.019	107.48	88.286	96.401
86.927	85.216	131.31	119.06	133.35	116.99	128.16	110.57	101.52	75.045	62.825	80.298	77.073	78.955
127.7	115.57	120.38	122.61	95.672	128.55	117.72	133.92	132.72	101.89	118.22	76.665	109.6	88.204
127.7	148.21	144.9	150.24	138.32	144.67	142.33	124.17	109.79	136.28	118.68	116.42	89.031	137.66
134.93	244.56	149.79	209.28	175.43	224.72	162.07	208.69	163.77	247.91	255.61	269.91	212.35	256.12
83.962	167.93	163.83	152.07	161.96	130.54	144.71	105.11	70.707	164.12	118.61	152.41	93.374	169
45.992	53.344	81.088	48.214	64.405	46.574	65.12	47.249	30.643	53.122	40.837	53.549	33.768	51.571
48.035	78.531	87.417	73.455	75.189	76.582	76.734	84.46	54.159	71.535	73.184	85.383	56.223	70.111
50.553	90.257	60.8	74.957	68.665	77.593	48.189	137.22	152.6	86.207	120.76	87.046	147.92	79.188
64.896	175.38	154.36	163.41	142.16	155.28	141.51	165.62	156.29	171.46	160.84	149.88	185.97	163.03
71.79	187.6	154.36	163.41	142.16	166.88	141.51	169.21	176.39	171.46	189.69	149.88	170.15	163.03
65.692	121.74	142.51	100.9	92.182	123.74	134.32	96.911	90.34	132.89	110.29	91.638	99.505	127.99
90.034	125.61	215.5	145.28	154.83	126.59	191.12	111.03	112.32	136.52	114.82	107.45	113.19	129.85
73.739	71.388	118.87	86.504	95.016	88.355	80.191	70.569	92.152	96.601	78.801	100.88	69.337	100.63
87.458	163.54	143.8	160.63	148.69	144.23	147.24	167.87	164.29	173.38	196.55	179.37	180.96	201.01
156.23	117.21	139.51	152.78	122.83	138.2	143.76	147.79	149.51	103	95.082	92.702	106.99	110.58
102.48	113.93	127.36	152.78	108.52	138.2	122.4	147.79	155.74	114.59	94.133	121.33	106.99	114.35
64.065	80.296	104.92	54.288	77.831	70.208	83.457	71.07	72.314	83.145	89.964	77.474	88.858	77.643
130.31	171.62	261.63	147.21	158	138.27	188.71	144.64	124.01	182.06	160.85	126.95	145.94	157.96
127.26	150.56	240.66	170.56	202.69	128.76	210.36	150.06	172.22	135.93	139.64	129.75	150.86	124.52
64.972	150.56	234.68	135.06	173.99	138	200.43	130.09	108.49	135.93	125.3	116.48	100.72	125.59
69.63	129.29	214.21	119.5	131.4	98.214	142.78	130.09	108.49	130.29	99.281	111.3	91.396	104.19
65.846	89.45	141.18	90.88	90.098	105.25	93.203	96.871	103.89	72.615	74.469	74.066	83.005	70.045
68.952	88.575	112.61	91.501	101.87	94.081	101.3	84.183	65.397	70.916	72.266	74.066	63.111	70.045
153.62	308.79	215.06	239.96	193.66	246.39	225.81	249.39	212.12	372.69	319.56	321.92	258.69	377.33
149.3	143.53	143.8	157.25	132.22	171.44	159.06	140.73	128.75	177.44	141.51	227.3	137.41	161.47
147.18	250.53	220.73	254.67	211.54	257.66	256.65	213.61	239.15	213.06	249.54	191.82	230	208.31
184.06	241.77	205.21	264.17	222.31	267.13	250.85	234.66	215.89	224.42	205.55	213.37	170.96	236.07
184.06	128.64	243.92	130.68	187.88	152.28	220.08	122.29	123.99	96.585	117.81	104.21	139.16	106.66
139.37	86.944	145.69	84.696	144.04	74.147	120.94	88.393	97.521	75.758	105.22	93.162	130.49	80.796
94.545	62.273	87.351	67.098	80.699	76.015	81.549	80.992	87.666	73.359	93.413	81.699	95.785	64.105
95.508	78.148	117.37	85.396	101.86	78.614	102.34	69.128	74.818	67.407	71.594	66.504	61.937	57.066
81.467	105.68	117.37	110.85	105.26	122.11	120.8	100.89	93.373	109.13	113.23	102.27	87.787	108.07
124.41	163.77	209.25	143.97	151.91	149.36	188.53	130.65	106.95	172.49	133.76	132.95	145.16	155.84
136.01	281.18	247.73	231.35	205.94	226.09	200.81	199.42	161.1	283.24	239.19	237.5	169.49	268.13
80.85	134.47	142.8	112.91	109.17	104.54	118.23	133.89	115.88	152.26	121.99	124.79	127.86	126.56
90.277	148.63	179.64	164.01	120.91	153.08	156.7	190.28	154.43	154.41	121.99	128.14	127.86	127.4
147.52	104.32	101.79	106.93	130.51	102.91	86.716	116.65	107.5	120.92	94.378	120.7	102.84	113.19
73.469	98.133	101.79	102.03	130.51	102.91	87.939	116.65	74.915	94.398	88.786	76.663	91.525	80.07
88.975	96.935	136.85	146.31	62.547	152.61	139.69	120.2	88.629	72.592	80.467	76.663	114.97	69.327
67.594	84.639	98.683	81.618	81.582	88.997	91.349	67.49	63.136	86.85	81.128	80.628	65.175	81.472
28.379	64.812	91.374	80.746	69.383	70.304	82.106	82.427	63.136	44.262	45.257	44.643	45.181	50.319
27.555	40.554	48.298	43.392	40.668	37.533	43.196	39.882	33.982	46.708	35.397	30.696	26.696	40.031
42.173	111.79	167.93	93.294	121.87	94.639	136.32	67.175	65.996	96.908	108.81	114.14	75.398	99.849
31.621	141.41	212.96	139.48	121.87	111.88	174	94.558	75.426	132.06	108.81	107.28	75.398	130.84
30.677	58.738	68.646	61.333	43.662	54.468	60.66	59.125	46.889	52.958	45.942	37.721	36.758	44.379
54.247	96.793	117.13	99.422	94.899	70.18	100.38	55.328	76.301	94.062	89.378	69.007	83.78	75.918
48.54	111.84	183.77	106.79	109.53	101.65	135.39	97.391	58.157	103.02	89.165	80.574	91.107	87.514
33.793	99.586	133.06	99.151	89.483	94.176	122.72	59.756	57.483	84.093	82.985	61.736	62.055	80.977
61.773	169.32	188.66	184.66	161.6	170.78	188.94	167.66	120.23	152.57	148.4	146.82	106.03	154.28
34.946	67.417	70.875	61.791	45.289	63.2	71.101	80.988	107.29	58.388	68.857	57.83	69.447	72.901
116.83	88.506	118.31	77.909	85.929	96.038	102.59	101.71	125.48	82.516	109.08	86.798	117.57	96.752
78.341	107.64	118.31	108.66	103.52	96.038	133.05	136.68	125.48	110.4	114.91	92.758	123.15	104.56
89.689	136.66	198.29	136.43	143.9	128.77	149.28	96.131	95.271	134.22	146.92	98.239	120.48	118.41
83.587	137.3	218.14	135.3	113.6	141.87	160.61	152.43	142.78	144.56	116.4	143.12	116	140.1
139.73	109.53	110.46	115.4	96.27	123.27	112.93	139.97	136.5	87.29	100.78	85.126	124.73	89.012
127.11	117.75	116.92	101.71	103.11	111.58	113	154.35	158.54	121.82	138.14	130.19	142.21	116.1
127.11	131.11	124.4	115.44	117.74	128.04	134.87	174.99	158.54	125.14	138.14	130.19	194.05	116.1
78.03	121.13	86.287	102.47	100.43	93.674	91.319	92.417	111.69	119.7	143.32	121.21	157.01	130.85
78.03	123.92	97.671	101.88	99.285	106.36	100.79	90.29	86.685	119.7	136.12	121.21	122.02	130.85
98.268	95.654	91.59	74.495	99.415	81.345	89.627	74.238	64.533	95.348	93.886	92.648	95.567	97.315
55.013	40.538	67.102	61.92	76.2	63.725	64.004	70.687	103.83	37.599	47.532	44.343	57.16	39.279
98.953	108.48	128.58	123.94	117.8	126.26	135.18	88.393	81.441	111.9	74.913	107.06	68.616	116.83
155.8	133.29	195.47	184.81	205.42	169.74	239.92	113.09	120.21	115.32	100.43	110.24	99.639	137.33
109.31	152.43	109.68	140.39	126.76	150.71	129.33	145.62	158.91	147.61	138.99	152.81	151.81	147.5
79.604	108.41	91.869	93.707	98.589	101.18	94.157	119.91	118	101.68	104.9	98.539	118.63	103.89
124.28	116.79	108.49	121.4	97.486	111.41	100.68	123.43	139.84	119.22	97.924	99.091	109.25	102.39
177	125.21	163.73	125.99	128.88	125.84	147.55	111.95	138.94	119.22	146.44	136.79	133.85	119.79
142.23	117.48	111.04	125.01	125.21	112.55	114.41	140.93	142.49	122.1	121.69	129.86	147.73	120.97
139.94	105.17	90.827	125.01	92.054	110.86	114.41	144.04	165.82	74.906	97.015	72.619	147.73	79.635
107.25	145.36	102.98	144.15	111.25	136.48	118.64	171.33	138.95	145.27	142.13	128.49	152.77	141.66
167.72	123.87	91.384	123.69	95.426	111.25	110.98	130.88	138.95	113.42	124.29	104.74	144.3	115.33
131.67	152.03	145.84	144.74	119.66	126.31	142.82	147.53	163.18	140.51	156.48	123.75	159.72	127.36
131.67	188.84	175.46	181.57	169.53	193.88	173.45	182.26	207.37	214.15	217.26	184.89	214.23	203.37
116.79	124.52	177.61	146	138.05	146.71	140.63	137.35	150.88	120.47	137.27	111.29	165.04	123.27
127.01	84.803	118.04	119.8	114.97	84.804	132.26	85.283	81.372	72.258	76.436	107.43	63.795	85.553
76.266	43.865	41.364	51.536	43.695	63.411	44.573	77.589	101.9	38.471	55.857	33.75	52.956	36.842
27.33	50.575	41.364	65.219	33.968	61.38	44.573	120.37	96.959	38.558	55.124	28.904	86.361	34.697
64.392	122.98	93.595	95.256	94.68	92.261	75.727	144.81	136.38	101.42	100.99	103.84	92.256	98.994
107.18	187.2	171.93	180	176.64	187.79	192.44	150.58	132.65	169.31	147.98	177.29	110.61	194.97
84.521	144.15	119.44	156.4	150.31	160.23	135.45	96.631	95.405	151.54	161.46	167.83	119.66	151.2
145.82	134.96	119.44	129.04	131	135.77	127.69	133.11	132.77	140.12	138.12	97.462	119.66	117.94
113.36	82.23	90.478	91.684	99.758	79.944	84.305	100.57	75.757	69.344	71.547	79.173	76.984	69.62
59.106	139.75	92.724	139.81	106.14	134.76	105.9	128.37	125.51	146.27	155.79	167.69	127.79	152.14
91.489	151.14	117.82	148.17	106.14	169.18	109.16	146.3	123.21	131.02	106.7	123.11	70.012	138.8
74.769	99.389	101.03	85.594	109.14	86.242	116.2	72.763	75.328	94.14	81.702	89.618	59.217	99.712
70.231	85.134	106.57	102.46	95.782	75.766	84.79	72.788	40.747	73.643	64.935	75.832	47.953	79.434
70.231	139.7	230.44	125.59	132.87	125.37	136.76	127.48	94.204	141.75	144.97	144.99	105.59	126.82
71.98	119.46	89.347	93.42	89.963	104.5	84.523	125.04	143.84	122.37	115.1	115.48	135.76	119.94
118.74	88.843	115.3	100.58	82.89	104.5	121.05	148.38	111.29	105.1	76.285	77.761	71.79	83.486
88.887	101.98	104.71	130.04	90.241	123.29	116.72	138.61	134.29	79.987	94.994	53.988	125.22	64.83
81.624	109.36	83.617	121.25	75.677	94.428	94.694	102.77	111.18	107.04	107.89	101.06	122.39	106.45
115.32	115.78	98.682	122.28	77.527	123.23	103.42	147.16	140.34	100.84	107.89	96.582	121.02	87.714
65.99	64.701	67.88	64.214	63.965	57.74	63.704	60.158	64.702	73.181	71.085	71.927	73.033	63.358
85.612	123.85	106.6	108.16	66.673	107.5	83.862	153	159.34	133.88	177.64	125.05	173.4	112.79
115.97	156.04	106.6	133.19	112.11	152.05	127.79	148.39	155.16	139.67	157.67	134.66	169.97	136.13
70.062	77.52	100.58	92.096	86.536	72.592	83.469	148	84.825	85.352	104.49	110.86	121.67	75.547
113.73	105.48	98.27	95.777	95.416	86.61	85.874	146.55	123.99	106.49	125.09	113.75	170.23	96.335
187.52	108.53	120.01	112.48	86.089	115.53	89.851	121.01	155.76	107.48	106.55	123.07	101.43	118.61
103.78	182.31	93.846	156.78	113.28	175.73	98.62	190.54	157.06	191.96	156	136.56	143.91	152.94
52.732	71.811	41.713	68.445	49.826	85.134	52.743	77.758	64.737	82.263	80.73	73.738	85.534	76.282
59.946	49.365	44.513	63.755	52.939	59.416	49.881	76.569	63.792	57.138	54.736	43.098	56.972	49.101
58.36	40.004	64.135	74.864	83.171	52.038	82.941	60.695	45.762	36.894	30.372	39.929	39.265	41.625
52.181	68.317	76.292	104.12	100	102.7	82.941	91.197	77.833	61.589	52.7	62.421	44.335	58.809
69.27	68.454	59.228	94.891	59.26	93.257	61.897	80.497	77.833	78.603	79.444	94.388	57.383	85.676
94.259	65.897	104.11	85.542	86.616	73.697	94.12	77.099	83.164	79.397	91.144	74.654	130.25	76.863
229.76	212.41	186.43	199.04	166.38	204.38	182.01	189.03	166.74	170.77	180.84	173.3	209.89	179.73
158.53	212.41	156.88	200	127.91	213.68	165.91	224.19	241.96	196.53	204.88	173.3	211.97	198.32
119.79	180.24	121.32	142.55	148.14	146.01	145.43	161.41	160.25	161.94	171.92	163.83	153.99	183.33
90.476	99.084	47.858	88.75	63.564	91.939	59.521	94.433	105.1	95.292	103.79	94.868	116.28	84.558
130.39	87.253	139.31	81.652	77.102	82.755	102.04	91.004	119.4	83.374	104.53	90.645	112.09	95.962
103.57	87.253	106.65	78.015	68.404	76.237	79.94	71.31	80.595	79.148	80.35	90.645	93.207	88.849
66.465	87.977	95.699	87.517	114.69	94.774	117.42	84.953	64.19	79.148	60.169	81.929	52.404	80.214
70.074	100.75	78.775	126.94	106.7	123.78	100.27	134.63	114.94	83.672	71.912	65.065	74.803	77.425
94.951	80.386	104.66	106.97	105.92	108.99	84.221	135.08	114.94	83.195	86.796	103.98	98.751	89.012
101.02	66.031	78.412	88.083	64.464	72.893	70.607	72.446	84.32	55.258	57.967	53.406	69.57	54.764
39.127	55.554	37.088	61.696	64.365	47.139	45.202	63.87	53.189	55.872	55.736	70.683	58.985	62.56
26.559	19.056	25.498	30.615	25.086	16.855	26.653	32.21	14.883	18.921	26.351	21.078	21.763	18.447
32.309	23.767	22.405	22.794	24.852	20.859	23.848	28.828	12.227	23.201	22.106	23.395	11.07	23.7
22.674	13.558	17.433	33.414	16.679	9.1674	22.004	17.85	9.7863	15.263	11.52	18.579	7.6532	14.788
28.153	17.004	31.196	18.63	25.231	14.418	26.365	20.985	11.847	17.744	11.014	14.519	7.4318	15.65
22.858	15.57	24.724	19.205	17.541	10.737	18.407	11.631	11.567	13.055	11.014	16.01	8.0622	16.041
22.471	10.823	17.474	13.51	12.74	9.9854	14.29	38.324	5.5314	10.993	8.7331	10.337	5.9928	7.9644
15.51	13.827	18.084	23.118	18.448	14.792	19.196	15.792	8.0045	20.581	14.965	18.88	9.4236	19.706
18.836	11.501	12.51	12.414	10.272	8.9086	11.956	9.7931	6.5139	9.1412	10.592	7.9812	6.0964	8.182
19.185	5.0824	10.725	10.679	7.901	4.8025	7.436	11.223	4.7459	4.7536	4.6229	5.3563	4.361	4.0837
15.875	9.4774	18.39	8.3938	9.6955	9.4418	12.326	8.4104	7.7459	12.224	11.659	10.68	7.6251	12.223
19.714	13.417	16.4	15.337	13.109	10.742	11.095	9.5394	12.533	13.866	15.521	10.942	11.525	13.599
18.554	11.273	20.87	15.272	12.621	10.742	17.262	20.238	10.752	11.08	9.2742	6.5956	10.85	8.5085
24.213	16.889	25.234	23.227	18.207	13.52	19.498	14.313	12.933	12.299	11.494	11.783	10.919	16.43
22.294	18.505	18.184	23.481	14.601	16.407	22.117	32.129	15.031	19.766	16.052	12.228	13.575	16.43
15.121	9.9286	13.757	13.523	11.042	8.6308	13.168	29.503	11.239	9.4982	9.9985	8.1133	8.7934	7.6759
9.2885	8.1156	13.867	11.684	11.126	5.7194	11.364	16.649	9.3183	9.7508	10.253	9.3885	5.6501	7.1886
22.899	12.57	17.873	15.42	13.216	9.4479	12.882	14.56	14.258	11.207	14.995	9.3172	9.8245	8.9109
39.316	27.076	32.566	37.682	22.87	22.014	25.674	42.658	17.92	22.527	24.571	18.748	20.826	20.154
39.316	23.266	32.566	35.161	22.87	22.014	25.674	24.216	17.92	20.288	23.432	19.26	21.098	19.041
27.928	14.792	25.198	23.427	19.036	16.205	19.247	14.11	11.366	20.288	19.497	13.662	13.131	15.363
28.771	18.858	24.451	24.333	15.093	18.139	18.942	17.045	13.663	18.245	19.327	13.724	13.131	15.388
27.174	32.247	30.3	28.409	25.534	26.339	29.01	32.987	27.152	29.56	34.631	26.977	25.151	23.218
29.976	17.727	19.825	25.042	16.815	20.096	21.079	18.648	15.103	16.522	16.603	13.223	13.394	17.183
27.6	17.365	23.409	18.13	17.073	17.185	21.079	17.49	10.141	16.522	15.963	13.765	11.24	17.183
16.776	14.316	11.933	14.108	9.9975	14.108	14.054	12.051	9.4985	13.437	18.306	11.216	10.08	13.817
19.841	16.191	16.364	15.232	13.038	13.863	14.646	13.336	11.95	14.443	17.553	14.339	12.198	16.556
19.841	14.288	23.155	18.176	18.219	13.16	20.022	16.201	11.95	14.265	13.517	15.215	11.918	13.115
22.922	15.605	27.491	18.176	18.647	12.05	20.953	16.571	11.852	14.265	14.75	16.677	17.581	12.135
22.922	13.212	18.289	12.478	15.081	9.6464	15.229	13.257	9.7709	12.048	10.887	9.8449	8.1731	10.491
18.118	12.834	18.205	17.78	11.65	11.154	12.985	13.257	8.2823	11.375	8.8619	11.625	6.9724	14.274
14.804	13.551	12.221	16.01	13.619	11.154	10.753	9.5805	9.1695	14.667	16.923	13.145	15.001	13.433
17.897	25.793	18.031	25.251	19.277	24.635	19.887	19.149	14.956	29.178	24.221	23.19	16.841	23.439
10.933	14.794	16.968	15.897	13.797	14.877	14.723	14.285	11.821	14.273	16.595	12.587	14.874	14.922
23.972	26.468	27.934	28.252	22.986	27.818	28.364	30.555	17.117	22.294	24.205	19.854	18.7	27.708
29.479	55.456	47.497	55.929	55.359	49.709	45.073	55.791	39.689	48.762	53.052	40.555	44.065	45.82
19.757	21.522	15.009	21.87	17.378	16.655	17.605	17.228	12.475	19.15	22.311	16.623	16.46	23.29
31.642	32.917	34.579	33.269	31.348	35.073	32.402	27.813	23.198	31.477	29.441	23.524	23.155	25.568
22.902	42.374	30.438	42.687	28.397	40.967	36.173	33.846	31.502	43.201	42.687	32.316	35.882	39.169
56.464	73.028	78.541	70.513	82.509	66.195	73.817	43.659	35.407	66.446	59.36	64.487	40.506	68.227
46.053	58.798	55.567	68.393	58.148	40.028	46.276	69.94	50.458	61.478	59.168	63.929	49.05	61.892
35.173	38.658	38.374	33.758	52.627	33.372	34.952	62.299	45.639	38.993	49.06	33.335	46.886	30.243
61.651	65.69	61.101	66.357	65.447	79.91	66.065	100.88	80.689	64.068	59.423	60.408	74.923	56.58
113.39	67.003	96.244	79.22	74.295	68.932	84.498	112.67	109.04	62.655	66.89	47.784	100.36	56.732
128.1	75.86	124.74	103.79	120.4	102.6	111.56	103.38	84.696	72.185	106.75	101.06	93.43	84.047
104.46	82.136	93.45	81.629	91.579	91.034	91.83	99.979	119.37	81.935	90.145	87.871	76.281	82.664
55.807	71.896	41.733	66.812	44.013	66.641	50.261	98.551	106.56	72.954	75.802	58.724	87.493	63.632
78.771	66.005	59.604	65.866	52.444	70.436	54.858	72.463	82.213	55.055	83.368	65.512	86.186	54.504
104.63	98.565	85.838	78.413	105.2	87.017	81.565	91.209	112.62	103.36	134.56	138.38	120.61	132.4
126.58	149.6	131.99	122.46	161.71	109.65	133.43	107.22	119.84	165.94	178.71	192.9	135.37	190.18
113.79	140.52	101.51	122.46	109.81	117.44	110.58	125.07	123.69	143.9	190.03	137.79	205.84	130.92
130.83	150.8	116.88	124.98	97.278	137.93	116.11	146.55	183.25	150.16	168.27	145.01	196.15	155.62
85.252	102.08	106.43	95.321	117.06	107.39	87.896	112.6	115.3	109.88	104.2	90.053	125.36	106.07
76.438	111.54	87.154	142.12	103.8	133.8	108.95	140.76	146.59	103.58	118.11	81.816	132.81	100.34
62.863	103.19	45.338	85.156	51.437	108.9	54.222	132.01	144.16	90.546	129.65	75.647	154.91	89.611
53.323	88.55	35.737	82.102	46.539	95.988	51.381	103.97	120.06	80.889	94.319	63.124	123.53	66.932
88.082	99.055	92.659	125.36	93.83	115.16	117.59	117.72	108.88	99.172	109.88	75.028	97.737	79.922
73.928	114.32	75.457	125.36	78.41	144.05	80.202	129.84	112.5	109.04	149.84	100.01	164.53	108.19
133.18	162.82	163.38	154.62	130.54	144.66	149.07	148.85	178.31	143.55	133.67	143.67	160.68	133.35
66.693	75.545	72.329	73.728	89.895	93.187	62.216	98.046	89.07	61.374	90.558	49.181	97.217	58.605
63.645	75.545	60.808	73.728	56.955	71.789	59.936	98.046	83.39	60.817	82.876	70.849	100.65	53.964
99.925	116.78	88.23	120.3	86.081	98.251	104.58	103.26	84.541	91.572	119.73	98.049	133.02	98.421
99.429	93.505	89.772	84.642	64.6	77.319	87.52	126.68	143.99	114.66	95.569	100.86	132.94	98.362
75.796	124.75	89.772	109.22	65.53	109.42	84.524	162.28	145.3	101.25	132.94	74.943	150.88	81.487
56.362	41.353	42.493	62.831	40.348	53.301	36.829	56.212	79.957	42.254	65.526	31.946	72.013	41.399
44.144	78.704	38.092	80.121	39.179	82.752	39.32	78.493	115.68	77.486	109.42	74.12	106.2	79.953
111.83	110.72	95.455	91.679	134.7	84.689	116.43	72.622	74.431	137.72	114.56	158.56	112.38	174.16
123.92	89.577	73.369	95.415	81.58	109.26	83.204	135.57	137.55	85.582	102.72	66.845	125.26	79.494
126.4	78.988	101.09	89.858	75.768	79.429	88.878	104.73	118.57	85.582	76.446	52.091	82.102	57.068
174.13	125.69	150.24	134.19	115.43	123.1	142.73	106.37	119.15	137.62	111.32	102.27	142.16	109.02
94.775	92.241	84.197	118.94	85.288	96.906	89.878	74.769	83.482	91.239	85.204	102.27	100.49	106.08
72.44	67.545	55.575	48.597	57.147	71.773	53.064	74.769	88.476	91.239	85.204	85.217	89.263	71.138
68.424	74.006	65.568	72.115	60.11	71.754	67.96	97.281	90.454	56.794	79.584	56.076	87.387	56.792
106.48	137.8	90.936	140.37	80.064	141.08	99.238	181.36	166.69	131.67	157.78	112.36	168.53	125.58
146.7	149.09	117.91	140.37	107.77	133.18	112.65	173.96	149.43	117.71	157.78	112.36	157.13	120.24
160.54	162.36	135.79	123.13	146.36	120.34	133.06	175.74	145.37	143.16	170.32	165.85	141.2	163.81
160.54	140.48	156.98	116	118.82	120.11	127.28	149.67	148.61	138.68	156.34	102.79	163.32	136.87
131.36	114.9	103.36	110.09	99.759	114.3	102.81	106.23	114.74	97.612	129.74	101.17	121.91	102.33
125.71	103.58	82.413	91.777	101.32	71.189	88.363	92.218	88.368	104.24	129.74	101.15	121.91	101.18
75.029	112.94	89.801	102.4	101.32	94.462	93.217	92.218	99.498	133.4	142.52	108.39	158.2	119.27
110.91	76.611	105.66	80.031	111.78	75.885	105.62	59.464	58.098	68.985	67.001	108.39	71.921	82.006
112.57	56.374	116.44	80.031	101.45	66.725	97.578	60.482	81.013	54.556	58.742	73.89	56.982	61.894
112.57	103.45	131.83	109.77	130.54	118.4	118.2	98.573	92.302	92.365	81.58	107.03	82.475	102.55
97.008	95.316	71.516	97.609	73.888	107.71	85.308	90.575	80.842	83.077	75.571	96.389	69.473	91.362
154.09	132.42	123.35	126.14	106.79	123.82	113.94	149.6	166.87	124.35	156.81	133.51	177.91	133.24
154.09	191.95	127.93	172.63	171.84	179.73	174.83	189.42	169.41	174.32	187.09	190.03	213.72	182.71
185.16	179.74	151.08	164.34	164.66	172.4	161.45	158.52	155.66	175.95	210.38	182.96	247.35	179.86
98.072	179.74	106.01	203.26	138.83	189.92	131.49	188.94	204.8	175.95	210.38	168.06	255.99	180.99
88.901	117.99	88.805	108.39	95.136	109.18	103.55	121.1	137.14	99.757	118.14	113.77	115.95	130.65
81.491	64.71	90.133	62.061	69.769	70.782	80.603	88.38	106.48	59.379	67.424	62.029	96.852	59.185
66.098	77.516	90.133	62.516	91.061	67.618	80.603	78.905	106.48	58.342	90.243	62.149	116.02	68.46
89.2	91.557	96.876	102.5	82.811	87.035	84.2	92.195	110.13	58.342	84.673	70.167	80.593	77.124
97.719	96.545	111.95	128.29	123.06	109.44	137.15	103.09	91.214	79.662	71.274	96.646	65.122	77.402
117.48	87.595	125.91	105.28	87.222	100.94	115.24	96.86	95.776	79.662	106.13	102.25	130.04	74.529
135.13	186.98	134.81	166.88	179.15	173.58	165.56	174.44	194.92	160.58	234.05	165.14	223.53	174.9
135.13	197.62	134.81	215.93	173.1	203.97	189.55	184.47	194.19	161.37	218.47	136.88	180.27	164.68
126.49	73.626	86.663	97.777	86.239	94.763	96.219	96.397	111.95	67.656	113.71	60.715	127.38	68.172
95.786	74.783	88.182	119.82	116.69	100.17	139.92	91.564	99.454	57.74	65.279	63	60.38	68.172
117.07	88.799	100.38	128.42	111.98	104.48	122.97	91.564	78.39	78.311	81.43	89.909	57.306	90.362
120.06	91.823	98.701	107.24	111.98	93.923	122.97	98.938	68.624	90.439	59.494	106.15	65.708	110.61
85.461	58.99	85.099	72.609	93.785	78.681	73.103	77.516	78.911	73.989	86.76	75.607	73.693	74.709
52.675	46.744	47.031	53.681	42.179	49.61	48.933	69.879	88.013	34.85	51.621	32.285	58.686	42.841
99.821	91.579	101.16	123.67	129.87	118.47	110.86	99.402	80.785	84.87	82.048	89.484	76.622	86.995
75.068	88.188	60.978	95.063	72.502	105.94	72.302	105.51	80.785	77.055	82.048	65.113	76.622	77.286
89.833	95.171	95.976	112.31	85.742	114.6	104.05	116.56	110.49	95.956	99.708	65.113	100.71	87.256
178.7	173.3	131.78	159.85	117.04	163.56	112.14	175.69	181.1	183.55	179.65	197.24	184.87	196.92
151.67	130.74	127.17	129.74	120.56	125.19	123.95	133.72	129.12	124.28	156.21	125.95	176.27	129.65
280.27	158.27	220.86	129.74	171.6	125.19	182.54	140.24	153.51	166.36	208.01	180.96	224.46	180.65
104.82	97.572	82.47	89.672	93.354	86.338	80.058	99.765	122.82	95.445	116.96	106.25	122.69	95.663
143.09	156.24	122.15	152.96	131.89	156.62	149.82	130.95	112.75	148.41	139.2	135.76	147.46	152.43
205.73	119.37	221.11	144.9	172.04	144.18	203.97	130.99	112.75	114.76	94.371	112.27	93.665	116.47
137.45	99.183	113.83	108.31	83.488	101.55	112.62	116.94	119.65	97.666	107.87	84.215	139.41	88.341
153.46	140.46	150.65	159.2	136	149.79	173.36	140.45	140.25	133.5	135.59	118.5	155.19	132.26
103.19	81.972	76.582	77.689	73.884	85.156	67.887	89.697	99.886	75.27	88.506	83.872	104.82	68.792
119.92	83.68	95.205	91.849	93.272	75.676	98.178	103.54	92.173	71.049	79.463	87.214	93.583	76.367
77.79	101.3	73.127	112.63	88.72	108.91	94.698	114.3	117.15	83.068	110.54	78.525	106.92	82.27
77.79	82.625	63.412	81.536	69.293	91.919	70.21	101.6	112.64	78.734	83.737	67.378	106.8	79.456
73.352	86.314	88.694	93.312	128.22	100.02	87.974	94.509	109.74	78.734	83.737	73.691	100.61	79.456
99.249	87.184	115.31	95.676	106	105.86	112.96	88.592	77.854	100.13	86.596	114.53	73.447	116.05
93.082	64.466	91.478	78.241	106	78.517	105.51	100.59	67.242	60.414	64.825	52.76	88.006	55.797
93.082	61.564	74.965	94.644	77.944	83.85	65.933	123.1	77.697	59.296	46.899	77.169	54.658	66.411
81.719	68.331	56.181	94.644	57.616	81.005	61.061	84.617	72.246	67.633	63.662	66.004	55.124	67.098
156.25	110.41	147.61	138.78	132.58	102.17	156.52	101.57	116.35	101.95	111.84	125.45	115.64	103.13
95.312	86.176	132.8	121.5	116.59	108.25	144.52	130.37	120.04	78.212	106.7	63.82	157.03	58.451
110.92	119.64	139.93	136.96	127.93	149.37	143.31	124.76	98.513	105.85	83.385	114.36	89.129	118.87
131.52	235.87	153.13	207.59	195.44	194.6	172.92	184.9	149.82	255.81	186.79	280.48	159.72	275.73
131.52	192.08	157.9	186.77	161.47	158.29	160.09	126.16	142.63	205.45	225.74	240.43	196.07	227.38
199.21	214.88	165.6	213.01	139.35	217.97	185.57	202.77	217.17	199.31	208.13	141.22	214.98	162.08
151.99	199.52	153.62	182.36	165.32	193.37	176.9	191.37	186.57	216.95	179.7	244.02	173.49	217.58
110.42	102.34	114.02	97.753	109.75	105.37	109.78	114.94	143.16	113.65	117.15	108.09	125.87	107.24
100.47	90.056	102.32	78.628	124.57	73.066	101.12	75.12	86.193	104.62	93.743	89.562	124.78	92.988
111.86	65.717	101.66	75.106	68.848	67.505	98.032	75.12	80.026	79.402	86.214	121.86	109.92	80.334
90.944	60.094	78.994	87.891	85.417	73.135	86.578	91.029	65.883	65.678	66.271	45.36	80.61	51.761
76.55	62.693	70.336	74.51	92.445	73.135	81.313	74.931	66.239	65.763	75.044	56.088	81.885	59.246
109.92	69.923	120.24	68.696	128.41	71.09	101.08	74.931	99.325	71.086	63.576	73.59	82.982	76.143
62.441	96.724	67.626	97.978	98.226	77.156	93.46	112	102.82	93.674	98.852	109.68	117.98	100.56
86.76	79.257	62	84.089	74.797	79.348	69.494	109.08	125.63	69.624	79.393	85.71	107.29	82.376
88.939	63.457	78.053	57.753	56.391	63.673	69.706	87.4	97.804	57.178	65.326	46.085	89.77	54.246
112.78	63.457	87.082	65.704	67.456	64.113	69.706	126.38	97.804	57.178	104.95	46.085	96.311	54.246
58.972	42.978	56.048	55.601	75.185	50.627	65.557	58.869	41.924	35.949	40.724	52.615	32.98	44.243
58.972	28.454	56.048	40.924	52.121	37.733	48.236	38.188	36.312	25.651	19.163	17.399	23.112	21.099
66.258	42.653	77.664	45.334	85.851	48.735	71.018	45.341	51.817	69.222	57.799	78.811	48.052	71.073
100.16	172.98	125.12	150.84	156.44	157.22	149.32	176.34	181.63	152.72	153.81	181.44	150.54	171.96
62.652	113.9	137.73	102.11	102.89	89.434	103.85	116.03	87.343	104.65	115.41	81.954	100.15	94.447
58.129	78.062	78.699	74.613	67.245	73.28	77.411	108.93	65.207	74.136	77.606	67.787	63.313	68.039
38.162	36.024	48.539	44.963	44.467	46.324	52.649	37.309	27.458	38.346	30.437	43.561	25.457	41.45
76.95	69.602	64.882	65.721	47.937	79.307	55.122	97.565	119.53	59.348	82.198	50.547	98.624	57.945
76.95	100.27	118.44	108.01	76.503	112.12	97.969	108.01	129.54	84.653	121.39	85.854	128.88	89.579
115.46	82.479	100.44	89.411	102.96	93.407	95.027	92.098	115.56	69.256	92.542	60.247	137.5	66.889
82.25	50.083	60.033	53.904	49.444	59.581	61.075	78.252	86.242	45.413	56.204	53.623	66.473	46.577
80.271	83.32	68.314	86.249	88.285	90.685	89.175	102.69	125.86	90.504	83.704	91.205	110.59	78.827
103.53	75.976	78.628	92.198	70.518	91.179	88.103	103.64	79.615	92.13	51.016	53.616	60.587	57.419
81.849	80.405	79.735	96.149	95.651	75.163	82.111	74.362	73.159	90.417	67.64	65.615	65.632	80.05
67.121	115.13	59.059	98.139	56.111	112.02	69.225	105.09	109.27	100.37	125.21	98.24	120.67	90.941
92.091	109.11	90.816	106.21	79.954	101.09	96.952	99.115	104.72	92.831	80.86	98.24	91	97.623
112.91	123.1	122.16	113.64	88.721	109.34	113.04	112.01	125.16	107.99	161.93	95.84	147.55	106.65
129.44	97.577	137.39	94.553	113.58	100.5	130.48	94.687	125.16	113.86	150.99	101.1	147.98	119.73
121.36	126.89	92.244	94.553	89.907	100.5	90.794	133.85	144.76	104.57	142.46	111.87	183.38	111.94
105.56	119.58	74.659	108.99	86.289	115.94	80.812	133.63	155.21	104.57	139.37	103.52	163.09	107.17
97.207	96.585	65.561	92.839	77.955	110.13	80.812	110.5	127.02	94.239	113.36	72.543	137.11	83.06
95.141	82.458	64.742	61.814	73.405	77.87	69.535	101.58	99.889	70.392	84.646	67.679	95.891	73.062
51.917	94.954	64.742	102.37	87.249	102.13	70.438	122.43	118.38	109.26	118.76	85.522	139.46	104.65
166.38	130.79	132.52	118.26	112.85	109.77	103.22	112.02	117.2	133.38	150.09	161.74	154	152.99
148.25	176.47	138.66	145.72	142.84	159.61	135.67	166.65	196.35	178.47	207.62	182.62	210.91	202.56
184.16	156.56	131.34	133.31	122.58	136.51	139.31	116.52	114.86	165.73	166.99	171.8	174.83	176.63
216.8	156.56	193.4	140.74	136.17	144.61	180.35	129.5	114.86	164.26	166.29	168.54	174.83	174.47
116.16	97.863	73.09	96.178	70.554	89.757	75.594	90.195	102.44	99.138	146.36	116.09	123.48	118.69
100.09	96.66	81.266	69.494	70.554	76.946	76.785	82.001	116.72	101.39	124.74	78.242	123.48	100.14
90.323	63.983	68.736	99.301	61.478	90.531	83.998	104.7	100.22	75.102	80.873	79.372	99.777	80.568
65.954	57.181	51.463	77.02	51.733	63.568	53.248	63.844	78.247	56.18	53.213	60.566	67.139	53.778
86.991	80.317	65.944	78.166	59.856	87.903	69.031	120.61	113.19	81.428	101.09	66.922	107.77	71.303
109.24	90.654	91.933	96.224	80.013	106.03	81.1	115.57	94.047	92.118	88.525	76.914	88.242	95.579
152.49	73.966	115.1	85.859	77.382	85.048	89.932	101.81	95.167	71.422	86.446	74.802	117.07	69.793
152.47	95.467	126.98	96.757	94.128	89.154	100.91	113.04	114.88	102.4	80.018	101.77	127.88	95.301
238.68	126.69	207.37	113.96	108.6	119.79	133.66	104.53	117.06	139.72	145.04	151.71	133.2	153.18
166.53	234.73	152.42	212.2	180.07	217.75	187.52	190.96	198.34	205.37	214.57	237.85	181.48	238.27
117.87	85.585	75.884	95.711	76.844	102.98	75.289	124.89	111.44	98.012	115.16	87.165	126.62	82.126
67.609	66.885	57.146	95.711	51.954	92.872	66.943	125.3	109.08	59.119	51.205	49.124	75.862	57.587
131.11	64.507	120.44	67.629	116.15	75.367	121.43	121.41	109.08	70.408	54.512	86.33	75.862	69.345
151.24	193.17	139.41	175.21	193.76	190.41	168.67	153.51	147.16	186.69	134.42	195.41	121.69	199.78
163.28	213.3	128.64	140.88	150.57	153.52	140	168.42	171.92	230.38	245.92	238.19	225.21	239.6
131.81	163.84	126.13	151.91	150.57	135.99	137.02	178.46	176.94	196.08	188.54	206.92	201.87	198.82
188.17	178.96	157.55	163.63	167.53	160.75	155.67	158.09	141.98	195.32	184.26	206.92	181.57	198.82
160.75	174.58	157.55	185.36	146.3	166.67	155.67	169.91	174.53	172.18	169.64	159.78	165.4	165.93
139.66	128.68	98.996	108.76	76.911	120.27	105.16	82.991	91.883	151.87	144.72	156.29	134.06	145.86
159.09	75.144	98.996	73.678	70.961	79.397	79.165	69.181	80.424	97.728	105.58	72.01	95.99	74.455
130.3	79.519	101.84	93.544	86.299	103.24	81.954	88.413	63.611	82.518	78.996	95.309	83.125	85.81
51.313	91.217	61.576	94.294	60.477	110.08	71.697	112.61	103.37	77.728	78.996	71.961	88.088	85.81
103.55	61.863	62.682	77.458	57.635	67.49	65.695	65.937	76.589	57.467	54.106	67.969	70.527	66.775
117.98	101.72	105.02	95.866	97.786	87.531	90.945	100.5	78.087	111.49	99.53	114.65	87.093	114.48
81.173	88.947	94.487	89.58	90.602	70.189	81.839	63.294	50.87	83.807	79.045	118.29	57.634	80.492
55.658	101.26	96.146	88.877	108.3	76.766	95.292	86.047	61.66	100.26	86.03	95.257	61.376	77.677
53.789	109.59	107.29	112.87	99.341	90.194	102.94	91.678	71.574	95.56	96.519	103.8	71.301	91.646
48.579	97.487	90.242	100.86	71.511	90.194	76.586	110.26	111.6	86.635	129.36	125.39	92.048	92.379
78.488	123	179.03	87.694	125.77	99.576	150.64	88.99	89.939	119	121.88	138.83	101.64	122.02
32.456	108.33	152.35	99.716	104.1	107.67	114.8	78.49	71.646	104.72	85.756	81.367	82.926	102.33
49.892	37.716	57.753	44.325	71.998	37.242	52.379	109.2	64.679	58.058	53.369	62.861	80.564	39.589
75.411	96.378	58.518	89.703	59.002	87.242	65.186	125.07	99.754	80.907	91.711	75.201	125.47	78.062
80.287	96.378	79.929	75.287	68.733	87.242	74.386	97.119	111.22	115.74	127.71	98.895	139.31	109.8
113.84	65.15	73.768	62.997	68.733	63.479	64.219	74.447	100.71	77.892	72.914	73.952	75.722	72.622
78.956	78.45	78.522	85.734	93.846	88.885	84.951	75.742	101.31	64.513	67.988	80.45	70.24	70.59
72.732	85.766	77.442	99.58	86.092	96.872	84.951	111.19	103.36	106.46	92.786	133.26	96.035	123.38
99.906	79.793	117.65	83.314	108.27	83.017	105.63	64.682	60.341	83.345	60.352	98.053	59.842	88.467
124.74	94.871	124.49	117.8	121.63	103.2	116.14	109.88	118.89	83.345	57.851	101.5	67.943	82.998
111.46	92.617	101.87	113.45	119.14	105.89	112.04	96.445	102.63	85.514	73.469	101.5	74.614	87.766
127.09	77.732	102.49	82.74	93.037	93.702	106.63	80.973	75.12	69.643	75.139	63.148	75.027	75.316
75.131	53.511	49.64	62.519	48.024	68.784	51.899	57.181	68.69	53.339	53.187	60.391	75.027	56.285
117.87	77.456	130.02	69.55	89.517	71.1	84.274	75.542	92.455	59.917	68.069	60.617	77.182	58.776
95.255	82.243	98.658	103.37	94.951	80.209	87.09	88.552	72.567	60.122	81.681	71.502	80.869	69.675
62.25	66.168	98.802	83.503	105.12	62.412	87.09	68.93	52.098	50.552	55.768	47.644	55.398	48.339
74.334	77.73	98.802	67.88	111.16	61.114	103.08	75.229	72.391	96.282	74.889	117.98	61.369	84.732
71.52	77.73	73.593	79.202	106.89	74.374	78.798	72.497	91.07	88.686	90.447	116.4	83.934	88.852
85.813	67.358	73.593	67.221	87.993	62.583	75.436	68.434	76.443	68.91	77.584	79.034	63.334	71.24
86.558	48.176	55.129	46.373	65.951	61.191	48.277	73.628	77.246	52.423	59.001	60.072	60.985	45.089
69.644	84.07	54.869	77.958	63.339	83.033	60.418	69.871	76.893	63.062	82.76	91.341	68.009	66.143
40.916	44.79	34.145	55.918	49.512	39.643	34.997	48.226	44.179	39.183	33.356	47.528	28.196	45.335
66.81	36.87	41.606	42.895	35.971	41.577	39.444	34.911	39.304	42.382	49.257	38.455	35.81	35.221
53.187	38.432	33.088	39.308	28.643	42.584	32.362	42.886	34.956	39.683	46.852	28.233	37.198	41.367
48.952	38.432	36.351	39.308	31.16	39.75	35.892	55.06	41.863	31.553	34.334	31.154	26.669	41.367
28.046	24.255	36.02	26.972	22.856	25.73	31.045	18.958	16.728	27.368	21.572	44.25	15.538	26.603
31.577	19.324	28.057	26.569	22.856	15.084	24.113	25.346	14.086	19.03	17.678	23.879	9.115	22.892
31.577	26.949	35.915	33.077	26.731	21.048	34.18	31.672	16.278	28.008	18.921	33.569	10.415	23.617
20.444	21.838	22.041	25.82	17.883	19.072	24.185	26.086	12.309	20.601	20.541	22.711	14.903	20.223
19.823	22.071	19.323	24.598	17.883	20.121	19.192	16.695	12.309	23.373	17.621	24.557	11.354	23.984
20.34	17.243	16.413	15.223	15.99	14.838	16.541	15.846	10.583	16.362	16.158	29.139	8.4848	16.13
14.007	28.062	16.243	25.969	15.843	17.325	17.66	37.255	28.419	27.419	26.709	21.721	18.348	23.851
13.043	14.632	11.256	17.612	10.845	12.319	12.499	16.643	13.038	18.577	14.206	8.2388	10.059	14.103
19.242	23.032	16.55	19.885	15.856	20.801	19.892	17.829	19.764	25.519	24.395	17.573	19.984	24.257
17.378	25.77	21.347	24.59	19.325	23.839	22.158	28.751	18.714	23.49	29.209	20.512	17.03	30.128
21.882	12.952	12.112	12.17	9.8508	12.06	11.634	9.6214	6.9885	15.103	17.664	15.577	10.613	17.142
20.531	15.7	12.63	15.586	9.8383	15.074	12.97	12.541	11.022	19.347	17.262	15.686	12.602	17.842
27.064	12.01	15.065	14.312	9.6421	11.053	9.2573	11.656	9.8523	16.528	23.751	16.16	10.877	16.471
26.931	24.571	29.987	20.661	22.879	18.658	23.623	26.378	13.628	25.727	22.034	23.984	11.609	26.546
32.82	43.341	80.628	48.25	54.313	48.079	74.74	36.113	30.773	43.174	24.625	38.603	18.705	37.059
32.82	60.606	60.722	57.979	51.873	48.182	52.089	63.848	41.359	57.991	56.719	46.482	45.292	55.83
30.698	42.594	38.732	53.387	30.331	39.706	34.564	58.525	35.539	37.925	33.782	46.436	35.213	37.314
35.134	34.279	35.906	29.653	25.904	33.747	31.644	34.041	23.069	36.263	39.44	27.537	25.773	33.651
48.925	70.726	66.608	61.918	62.823	62.459	61.766	61.313	46.89	59.616	63.754	49.133	48.377	56.548
32.548	51.857	39.219	57.335	36.508	54.107	40.208	60.519	53.814	40.393	67.682	31.665	56.592	37.386
49.425	68.508	51.475	56.055	55.292	62.913	56.808	42.473	43.753	82.718	77.678	74.046	47.206	81.618
60.207	49.407	47.189	56.055	41.145	62.913	46.303	40.741	36.624	52.215	57.196	43.541	42.639	50.518
86.888	78.898	70.917	107.4	63.795	121.07	69.424	107.58	110.08	71.042	70.346	41.141	66.686	54.024
41.317	34.652	30.95	36.463	27.19	36.794	30.057	67.084	68.629	30.542	37.14	26.643	27.651	30.324
80.828	87.712	90.885	81.823	92.976	74.956	93.728	86.728	93.588	83.865	96.193	95.874	81.581	88.826
105.58	147.19	95.754	114.46	129.5	131.48	108.36	108.48	109.73	150.37	153.77	165.64	99.812	159.13
49.276	101.61	67.297	109.99	90.574	91.041	81.204	98.241	88.728	100.29	93.395	102.14	72.05	99.242
53.813	65.64	127.42	73.148	87.994	69.601	84.633	76.022	75.452	70.719	57.296	49.968	54.655	59.35
34.182	84.182	63.014	73.556	49.998	81.787	58.713	90.831	92.199	70.719	89.076	49.968	84.891	59.35
53.448	81.588	137.31	89.238	112.65	67.569	114.41	72.034	67.289	74.021	56.141	95.442	45.058	76.737
105.26	105.67	137.31	102.59	92.427	95.092	98.229	156.19	126.64	109.87	127.27	92.041	144.74	98.744
93.049	62.484	128.6	80.993	87.782	65.314	98.26	81.786	82.725	66.815	70.622	50.803	89.07	51.97
56.033	82.093	63.869	100.63	68.738	72.612	60.77	107.02	86.364	70.25	106.18	70.763	111.07	67.49
82.055	49.078	65.731	58.124	62.679	63.38	57.696	59.077	69.792	47.566	52.965	53.377	62.234	53.475
76.724	108.01	110.5	111.87	125.72	111.67	129.34	101.38	91.032	117.3	89.65	100.94	89.356	93.928
109.56	94.242	134.53	116.49	119.47	117.87	125.44	93.375	82.115	91.848	91.293	96.769	71.554	101.86
194.87	110.31	221.66	126.45	147.51	117.89	191.86	100.15	112.63	101.69	119.43	108.48	131.86	105.61
109.96	76.373	110.64	92.361	81.85	93.318	115.47	83.595	99.87	64.329	56.19	65.483	67.211	68.637
85.64	76.435	97.378	79.947	76.46	60.935	85.146	66.583	88.655	77.887	75.014	67.9	68.765	81.499
85.64	163.14	110.58	136.41	125.25	120.84	133.17	145.93	149.04	163.23	166.65	162.37	137	160.17
89.07	83.716	73.861	114.85	82.672	107.79	84.875	105.68	100.34	100.57	81.006	117.33	69.998	119.97
100.22	115.77	101.78	113.61	112.57	111.77	111.84	104.84	93.681	131.29	108.34	148.15	85.753	147.43
59.008	105.97	77.269	107.15	74.823	107.87	85.346	110.05	141.32	129.26	156.53	136.03	197.52	128.64
67.535	89.134	47.031	67.876	60.127	73.791	67.869	86.205	90.403	105.52	99.616	90.251	112.63	93.226
94.464	68.727	72.135	72.966	69.941	76.081	84.776	72.716	64.075	69.014	63.992	90.819	49.825	78.939
74.774	61.085	52.726	76.978	56.694	64.973	62.114	74.635	69.104	65.409	78.28	62.822	85.566	60.904
70.942	51.532	91.765	90.472	100.62	79.827	109.24	59.052	46.256	46.933	58.12	44.813	48.309	64.875
47.871	71.488	91.532	71.631	80.095	62.366	88.381	76.107	50.33	63.782	54.485	39.447	53.64	45.93
59.604	27.518	28.719	31.246	34.795	20.756	25.533	23.897	19.792	33.095	28.176	51.695	16.938	29.939
59.509	21.242	54.478	30.803	31.821	19.808	41.615	17.629	20.001	25.512	22.284	30.548	17.332	22.913
57.327	53.122	62.714	57.871	70.583	56.196	60.895	49.687	43.399	56.64	44.947	76.594	22.761	65.87
92.414	86.048	114.3	78.854	101.76	69.825	112.98	56.729	35.693	72.565	68.749	90.18	50.1	77.102
41.289	29.626	29.308	27.148	26.485	28.476	27.792	28.854	33.063	30.137	32.674	40.776	29.508	30.538
41.289	55.467	39.69	40.12	55.043	43.556	47.391	61.779	41.78	49.94	67.777	58.569	63.513	54.782
63.725	83.586	68.091	76.521	82.302	78.58	82.783	61.779	49.374	86.906	84.143	97.872	65.586	91.772
65.022	54.528	81.277	55.019	57.282	53.611	77.825	56.545	64.444	48.552	58.167	45.896	85.616	50.091
84.213	43.039	81.277	71.878	57.282	64.645	77.825	74.351	73.561	39.235	41.821	36.942	70.635	32.461
80.485	75.401	97.818	84.875	90.629	66.867	83.068	64.211	57.536	83.897	91.837	94.607	76.514	86.382
46.089	89.818	65.491	101.25	54.591	100.08	69.85	109.83	114.25	68.914	94.514	57.644	101.15	80.694
56.042	76.173	51.054	91.511	62.28	84.007	69.85	97.415	93.998	68.914	75.529	68.604	75.148	77.611
161.9	80.235	107.76	99.975	96.446	94.363	117.38	86.08	106.74	73.163	75.529	90.453	72.9	82.551
110.29	97.812	107.76	117.5	94.655	100.83	124.58	120.47	121.03	92.989	117.57	74.604	128.89	89.666
72.569	78.471	90.298	93.115	114.47	78.249	101.71	100.62	109.93	72.341	81.172	87.007	126.98	74.35
96.293	68.747	87.721	67.241	107.75	62.533	90.963	82.804	86.871	83.251	75.332	103.39	97.649	82.82
105.91	89.089	86.613	122.41	87.217	116.21	99.316	112.1	104.48	86.661	102.75	84.91	98.989	87.196
55.938	46.187	35.995	50.209	34.999	51.423	33.505	58.022	64.45	46.34	61.69	42.421	63.327	45.638
40.523	46.187	36.031	48.767	34.999	46.815	41.739	45.455	64.45	51.388	79.697	63.798	73.414	46.838
55.489	89.607	63.971	94.415	83.626	97.052	84.022	71.861	70.99	87.171	71.194	94.991	60.08	94.692
72.201	70.814	75.374	78.751	76.74	71.813	76.683	73.912	72.388	69.14	79.77	52.902	91.077	56.069
57.745	44.193	34.949	49.091	66.736	55.192	48.245	71.541	76.973	39.855	57.248	44.269	50.29	37.855
54.185	47.312	59.548	49.684	62.701	55.192	55.573	64.457	67.286	46.624	35.575	43.762	43.508	57.513
148.94	66.013	110.93	82.454	85.319	80.146	100.78	74.79	94.198	61.078	66.055	53.513	96.328	54.495
88	70.443	105.51	82.454	109.57	76.825	100.12	71.881	62.717	79.805	66.055	79.061	63.492	70.35
56.236	81.069	50.434	72.373	49.667	85.614	54.402	100.71	123.51	66.715	87.299	40.054	92.765	45.361
107.24	116.09	67.3	106.08	68.328	110.89	78.379	145.75	167.41	92.641	113.02	92.797	134.18	89.195
98.547	32.091	57.136	51.068	93.293	25.949	79.329	56.71	33.142	30.992	25.741	45.728	21.518	42.45
39.061	18.676	18.747	22.955	24.326	16.52	16.373	22.374	15.151	30.992	21.973	34.067	19.175	31.576
36.036	30.873	30.758	28.263	24.758	21.942	27.054	26.34	15.264	37.132	34.983	34.118	19.145	39.112
49.397	34.791	36.94	44.592	37.097	27.58	34.179	26.34	23.653	34.11	28.683	34.118	21.089	38.324
23.174	29.598	25.309	32.056	20.694	24.48	25.087	30.347	18.386	29.935	28.683	25.793	20.635	28.36
29.142	31.181	39.531	25.633	29.623	23.694	36.378	29.472	17.256	33.559	23.146	35.014	16.238	30.641
21.935	20.197	24.363	31.372	20.535	17.854	23.3	18.153	11.777	18.541	16.987	17.513	11.721	20.24
22.455	24.152	24.363	36.474	21.098	19.272	23.3	40.187	15.984	24.682	21.058	25.841	16.748	25.104
22.343	24.152	18.444	20.043	18.683	13.418	18.88	40.159	15.984	16.24	21.116	21.094	17.776	20.216
18.011	14.427	19.945	17.263	16.612	12.555	17.368	18.497	7.8094	11.759	11.155	19.78	9.048	10.917
16.412	10.928	20.426	17.287	12.362	9.5737	17.782	17.136	5.1113	12.358	11.251	14.128	6.1624	14.438
19.025	17.96	20.426	28.84	14.005	17.674	20.872	26.762	12.013	20.073	16.087	17.978	8.2076	21.972
25.098	20.728	19.027	22.658	15.728	17.889	21.606	16.14	11.473	25.665	23.143	21.677	14.579	24.089
32.623	22.374	25.277	22.658	18.299	20.205	21.606	17.614	15.684	25.507	22.88	22.682	14.579	23.569
30.573	22.441	23.257	31.703	19.253	24.724	24.843	19.05	16.742	23.053	16.463	14.865	13.615	20.493
26.973	23.286	32.025	21.624	25.244	17.562	29.338	18.763	12.939	22.083	18.078	21.205	12.547	24.207
45.787	67.562	78.465	60.13	69.416	58.424	67.981	65.41	42.322	56.788	57.785	48.756	47.343	53.925
37.682	38.445	42.314	54.751	34.08	37.947	38.415	36.837	28.938	34.41	36.322	51.181	29.038	35.259
25.66	20.328	26.705	22.398	20.349	17.054	18.694	29.758	23.671	29.372	20.523	36.396	19.156	14.591
38.964	43.299	41.873	38.299	37.096	34.601	43.689	50.819	24.244	42.927	32.548	38.676	28.591	45.995
48.671	48.758	41.92	63.169	39.642	59.653	40.54	51.225	44.925	44.75	43.496	23.751	38.175	32.154
48.885	85.702	33.854	115.53	56.634	111.8	59.164	105.7	77.624	75.543	81.387	170.61	96.246	72.84
52.541	67.392	52.936	95.322	58.485	91.038	63.246	103.55	114.61	56.325	62.939	50.177	83.217	50.585
73.943	47.049	55.981	61.697	37.562	49.696	43.925	77.064	58.942	45.171	48.238	36.306	55.196	38.05
105.33	57.986	77.663	60.655	68.638	61.967	64.967	57.888	56.488	65.572	75.907	86.898	78.889	77.499
74.632	106.02	77.006	82.009	85.548	87.459	82.728	108.48	111.93	117.68	147.42	112.69	176.09	118.78
86.983	87.69	84.522	102.21	79.604	79.156	82.282	122.29	105.85	90.724	103.01	78.044	69.701	84.476
108.65	111.39	141.64	123.65	122.67	115.76	146.2	127.91	118.04	84.27	73.272	75.852	68.939	75.859
108.65	94.842	119.95	84.099	111.78	89.42	103.92	105.27	98.562	100.06	117.06	105.01	92.11	97.041
72.105	106.42	79.201	100.78	117.8	86.218	98.19	89.451	80.846	105.88	117.06	121.41	95.782	104.63
39.808	91.106	73.319	106.02	71.566	106.04	81.436	127.19	110.01	69.969	71.539	57.182	101.44	72.502
86.174	59.895	69.435	64.56	48.526	59.179	61.745	67.118	77.078	49.452	71.391	30.753	94.436	35.968
102.17	152.88	106.82	136.49	104.84	151	83.74	177.03	170.19	153.07	159.63	148.47	149.53	163.76
95.787	126.16	131.53	129.42	106.14	117.08	128.67	131.73	120.12	137.07	140.05	134.52	133.48	124.83
58.167	127.68	73.8	117.75	97.358	116.72	109.66	142.38	124.73	154.82	128.89	134.52	132.78	138.15
56.912	110.7	57.653	88.283	65.152	74.776	58.477	107.47	102.64	126.78	139.03	136.33	165.71	130.45
90.542	98.472	75.497	89.578	70.331	102.15	97.836	140.68	143.86	102.87	108.79	95.563	133.52	95.406
138.95	165.4	102.74	151.62	117.21	184.68	123.5	137.05	128.37	153.44	163.57	171.27	169.99	173.1
75.612	96.082	73.524	95.883	79.342	89.463	77.638	108.36	86.447	116.33	89.462	105	92.845	96.025
95.354	56.895	73.524	71.348	80.289	60.492	77.887	84.486	91.597	60.473	61.759	66.579	65.492	50.424
122.93	127.06	90.931	138.64	92.317	117.49	96.834	121.21	130.57	112.56	132.68	101.98	154.75	103.85
93.644	97.716	90.49	91.571	92.317	95.899	107.66	83.797	83.196	100.34	81.612	115.12	78.08	95.459
80.56	98.768	81.443	108.72	66.006	114.46	82.542	113.64	118.1	111.46	108.06	115.12	95.371	109.51
124.86	76.294	100.2	89.448	107.29	70.679	113.61	72.291	61.708	81.756	71.39	79.925	78.499	86.587
126.47	83.688	102.8	108.63	105.28	103.48	110.87	137.28	90.306	92.672	90.523	89.198	92.582	92.677
66.968	83.2	81.111	98.759	74.269	103.48	89.913	111.69	101.53	69.42	84.132	47.217	87.119	61.573
42.994	68.995	40.643	79.827	41.469	79.3	50.457	86.999	97.896	68.649	82.561	53.121	87.119	64.56
58.709	56.834	76.203	79.827	65.829	70.35	71.968	67.049	74.506	52.437	38.527	47.216	35.113	52.877
144.15	96.264	119.4	110.19	91.042	100.85	112.03	103.58	104.14	75.194	93.724	92.001	111.74	91.236
201.75	138.54	186.47	154.7	142.14	135.97	164.19	137.6	142.95	160.88	156.98	156.11	155.63	159.48
142.56	132.53	145.69	128.34	138.51	113.92	137.3	98.988	99.712	128.74	137.88	139.54	138.82	132.65
64.381	90.266	65.705	91.536	77.265	83.293	70.536	109.76	106.18	93.378	132.42	108.08	98.057	92.676
153.97	149.97	134.58	137.81	158.63	133.12	147.8	116.65	123.36	155.87	151.62	149.44	145.75	164.23
153.97	71.528	109.55	84.547	87.38	64.786	97.846	71.755	94.39	61.379	80.578	73.237	101.65	57.172
139.93	81.824	142.87	69.899	87.217	78.586	114.41	95.603	88.482	67.446	80.836	56.845	119.86	55.902
98.491	99.523	86.652	71.254	104.29	72.789	90.356	77.56	69.134	103.18	129.33	138.59	118.79	131.52
102.38	75.918	91.696	70.531	98.028	69.236	92.814	75.663	84.349	69.817	73.043	76.94	67.14	76.638
97.344	105.01	87.219	100.55	97.455	102.01	93.143	103.93	89.785	93.899	103.82	91.307	117.93	90.752
104.6	110.83	148.53	105.07	107.44	104.31	118.52	104.13	89.785	112.61	171.54	153.81	117.93	130.62
117.86	135.71	169.61	136.08	130.1	110.65	165.61	106.22	126.44	162.79	197.08	167.69	153.86	165.61
142.89	99.73	162.99	100.3	115.66	107.06	134.59	82.94	98.276	104.7	116.94	122.89	110.52	110.48
85.515	102.24	79.771	103.04	80.607	117.67	85.998	67.198	62.191	111.17	113.68	232.27	77.03	132.6
90.205	102.73	94.99	93.534	66.304	101.93	75.047	118.91	131.64	98.885	100.84	100.46	125.53	85.548
113.45	117.87	123.67	133.98	112.99	139.34	125.08	123.35	149.14	106.14	100.84	107.71	109.58	110.96
82.988	49.79	49.628	51.849	68.728	55.345	50.748	68.89	64.632	48.965	71.666	53.54	72.899	47.98
60.601	79.009	54.11	75.554	65.963	65.853	50.896	69.219	74.768	74.782	87.373	64.979	94.674	74.327
60.601	68.561	55.808	72.003	58.619	79.363	58.484	85.234	79.885	57.791	57.815	46.544	76.866	49.287
201.8	97.306	177.88	114.76	152.57	94.545	168.38	116.55	119.71	84.791	97.452	100.41	99.994	95.995
213.61	149.09	156.3	157.05	152.57	140.48	170.18	151.47	127.57	143.61	152.32	151.19	140.98	153.31
215.65	237.45	240.91	211.34	189.92	198.7	193.91	198.43	183.25	236.8	181.08	222.45	186.11	211.92
296.05	228.08	311.14	245.36	238.7	209.43	261.03	223.58	212.92	216.29	204.18	218.92	224.47	214.22
160.36	81.424	121.46	116.27	83.305	93.452	113.56	113.65	116.13	116.81	97.926	95.794	106.12	95.041
165.11	133.44	143.48	155.81	141.06	134.53	153.91	132.15	140.35	141.11	120.95	129.01	129.93	128.83
99.462	54.674	71.749	47.567	61.342	51.804	65.841	64.078	76.164	51.81	56.693	54.485	58.895	54.598
114.81	79.794	112.11	82.456	76.385	84.697	101.32	55.659	53.597	76.647	73.375	59.151	69.273	67.201
82.05	69.749	58.897	69.167	55.081	81.522	66.995	93.076	99.732	60.769	73.7	42.178	85.326	55.255
126.12	70.441	148.9	84.573	140.47	81.952	142.9	91.646	100.85	81.243	96.882	79.93	102.54	70.519
165.37	176.16	160.03	199	161.11	190.85	176.27	162.36	161.43	177.37	180.86	149.08	159.89	175.5
110.49	131.98	94.432	124.63	96.428	141.59	111.56	117.8	129.67	137.26	148.29	149.29	118.54	157.21
153.78	196.07	101.64	211.02	102.34	196.88	124.92	180.85	229.11	172.74	254.39	164.69	247.5	180.52
110.95	104.4	94.016	109.87	107.49	128.17	114.41	106.83	101.73	98.848	63.329	112.32	60.044	110.23
110.95	64.906	108.42	66.491	83.572	53.853	105.44	58.23	97.38	66.147	74.57	61.406	99.926	78.789
112.05	90.795	122.62	98.912	110.08	102.63	106.65	98.376	113.92	85.31	69.845	77.086	74.649	82.299
94.215	78.386	102.99	105.11	77.907	108.76	105.93	107.41	70.582	64.348	69.845	63.201	68.305	58.189
68.612	61.786	102.99	90.511	81.345	81.099	105.93	108.12	69.593	57.517	50.878	52.129	68.036	55.513
80.025	95.965	97.719	107.24	103.44	103.28	97.933	83.379	93.227	73.595	127.26	80.906	88.403	92.312
155.45	108.44	115.6	109.67	96.535	112.1	116.75	118.7	111.12	103.77	100.55	87.847	90.196	92.312
90.69	86.276	64.007	76.134	72.056	84.947	71.245	113.49	121.01	80.665	74.9	95.684	90.196	87.038
65.204	65.886	69.082	65.456	77.386	64.503	70.724	116.08	65.621	72.212	75.17	69.39	105.27	65.158
87.402	45.254	65.169	47.497	61.043	44.028	66.393	42.054	38.092	54.895	36.662	62.307	30.545	64.771
42.698	40.417	40.853	37.775	61.98	41.967	45.192	49.894	56.738	41.123	36.662	71.881	32.805	47.596
50.33	37.084	49.8	50.22	37.843	47.415	54.376	50.138	39.798	42.645	37.473	56.166	28.253	35.432
61.934	37.084	41.51	54.463	43.867	47.415	46.47	65.081	55.365	40.622	37.473	35.12	40.209	35.432
61.934	36.984	45.065	40.831	43.867	40.108	45.529	35.61	26.806	33.626	26.994	30.682	19.514	30.148
54.784	31.031	35.809	37.783	24.867	35.238	32.814	39.749	47.337	20.943	25.27	14.745	30.582	15.46
27.547	30.697	38.048	27.722	27.336	32.173	34.767	36.345	39.52	27.667	30.202	21.81	31.358	25.649
69.753	48.639	63.28	40.861	41.418	45.787	53.057	39.931	35.902	42.959	43.697	41.001	40.923	44.148
52.602	43.832	50.905	47.612	37.569	42.517	43.816	45.267	27.525	36.739	40.33	27.96	34.5	37.718
37.795	41.079	31.435	48.312	34.537	52.719	34.921	49.924	39.694	33.914	53.212	26.564	42.427	31.894
45.223	77.213	45.394	71.462	49.031	66.037	49.216	78.339	104.18	61.145	90.778	61.866	100.6	58.208
69.99	49.149	65.522	55.685	62.758	61.363	49.216	44.377	47.308	51.588	52.063	59.587	52.21	57.889
120.65	60.527	102.72	85.138	85.203	81.58	111.97	73.33	72.829	54.687	65.639	41.467	84.054	45.69
76.958	58.708	76.574	59.252	62.332	71.312	70.156	73.33	70.626	56.887	69.863	54.801	78.955	54.021
87.956	57.29	76.574	60.397	63.595	65.109	75.78	65.703	52.908	64.345	82.598	73.667	83.904	69.61
93.707	40.932	65.775	41.656	57.842	40.41	70.331	55.062	52.908	59.098	49.034	57.995	76.103	56.504
90.676	67.235	80.747	74.328	68.394	78.228	75.254	74.571	62.83	66.092	86.082	49.314	84.759	60.26
86.659	151.54	83.806	152.32	96.617	149.5	96.587	151.63	140.5	133.92	158.14	125.03	149.91	132
93.609	106.78	83.806	103.31	100.36	107.55	90.336	115.16	126.71	110.68	102.11	127.33	119.3	109.91
48.177	47.77	50.022	58.263	47.084	58.745	50.939	76.001	103.85	47.931	59.981	38.227	96.45	38.831
60.741	48.919	63.328	72.637	71.003	67.469	70.576	84.713	66.775	45.35	47.321	37.055	58.941	39.982
42.914	36.16	37.894	49.256	32.269	49.86	36.643	46.334	44.574	35.421	38.86	42.27	34.843	33.845
91.883	70.8	141.94	98.36	87.954	90.885	137.92	76.21	85.491	82.75	72.622	82.122	93.036	86.181
167.68	149.43	214.17	150.15	126.51	148.53	183.89	125.41	156.9	137.76	180	120.77	166.86	136.54
140.46	173.54	151.98	215.2	139.29	217.78	193.53	179.65	179.6	165.69	150.39	109.49	147.11	139.52
55.543	67.547	101	91.674	81.482	79.961	89.157	97.667	97.771	61.945	76.477	68.894	98.088	65.028
61.619	63.956	79.472	98.855	81.482	92.657	82.461	117.36	88.183	53.637	63.021	57.805	70.655	64.868
59.012	76.371	66.812	76.743	59.978	74.244	61.6	111.59	93.878	91.424	70.113	67.261	75.081	74.305
75.247	97.234	72.484	84.808	77.839	83.701	66.457	161.78	98.354	107.27	113.19	91.822	124.55	116.27
87.396	69.644	69.545	100.97	114.06	96.034	75.064	107.13	68.097	70.6	63.24	56.342	55.389	68.685
68.631	83.953	69.545	102.71	73.884	102.09	75.064	92.141	115.77	79.091	92.923	56.342	100.56	70.807
109.03	134.55	209.74	166.69	158.7	182.3	207.54	154.07	145.96	95.59	107.2	83.205	116.25	95.386
78.957	85.987	76.784	99.974	93.62	98.888	73.364	98.55	99.252	95.955	99.986	89.767	92.365	85.965
59.995	68.5	42.348	58.277	65.022	53.968	66.041	57.766	39.151	56.291	77.168	108.88	48.428	77.776
64.04	56.294	55.49	68.583	56.77	72.086	71.504	56.869	55.415	49.257	44.205	53.389	35.145	54.297
54.238	60.205	78.054	67.62	69.294	59.762	70.869	59.296	68.898	73.332	65.914	72.489	72.334	67.667
69.324	57.842	63.516	62.919	54.832	59.856	53.871	59.296	42.559	70.893	64.167	79.111	48.19	85.657
66.404	52.091	67.922	47.296	50.749	42.348	49.178	36.103	31.185	41.542	62.27	36.546	43.681	44.062
46.948	20.97	32.757	32.658	26.095	25.489	25.197	35.57	20.706	26.099	23.661	30.188	28.154	27.365
35.565	29.714	32.757	49.566	32.103	28.128	32.747	41.579	34.999	35.445	32.088	33.66	35.54	38.457
103.19	96.919	93.959	71.078	127.25	66.492	97.389	63.426	70.17	108.3	91.298	140.64	78.299	121.34
109.75	79.632	81.667	82.055	77.465	80.41	93.313	98.211	82.252	79.947	85.503	85.315	77.193	81.806
124.95	98.721	129.32	94.778	102.49	80.87	130.04	149.61	127.22	114.46	116.85	91.864	131.11	98.057
89.237	95.764	68.734	105.97	74.602	110.23	80.193	107.71	84.778	75.691	96.517	71.156	110.24	73.019
64.735	86.552	89.733	107.37	83.361	112.8	96.352	113.12	106.4	77.642	77.139	71.739	90.911	78.101
75.467	122.05	112.28	128.11	83.361	127.55	96.352	126.95	120.29	117.11	110.72	126.67	113.21	110.33
106.23	124.93	94.027	139.63	108.53	127.55	112.64	126.95	130.37	127.85	127.05	119.18	113.21	120.85
77.733	53.214	35.923	46.241	48.235	61.163	40.689	69.066	86.936	49.003	55.672	62.088	78.314	50.628
71.521	57.887	59.953	57.334	63.982	72.365	54.309	69.066	81.53	43.821	57.523	89.339	71.83	45.198
67.505	70.751	59.594	101.97	63.982	95.549	67.512	97.209	87.549	64.244	87.559	76.927	98.458	78.799
90.528	78.137	93.683	81.824	78.481	78.493	97.927	106.14	107.16	77.667	69.314	76.927	98.458	88.088
112.21	78.137	102.89	61.831	119.38	63.103	92.116	77.433	78.551	77.667	66.812	88.167	63.466	88.088
112.18	148.05	85.78	115.26	99.041	129.16	105.05	185.27	228.56	132.64	174.83	110.83	209.59	128.22
107.21	119.58	95.825	99.263	99.041	115.9	104.1	113.03	137.41	128.37	133.47	150.77	136.25	147.06
107.21	129.33	100.53	112.89	150.92	115.42	119.16	110.04	110.86	148.51	150.36	150.77	133.66	147.06
136.29	96.999	141.79	89.808	74.176	99.429	99.706	96.02	143.1	97.791	111.38	101.42	155.25	111.49
141.06	197.2	149.6	156.66	139.76	182.42	160.91	198.88	204.18	186.94	223.69	214.69	258.1	187.2
83.566	137.54	80.145	124.89	96.69	128.2	88.568	105.98	97.388	159.57	155.19	170.31	146.55	182.01
62.624	121.12	77.519	107.48	96.69	114.29	118.95	124.11	100.13	132.91	110.41	116.33	102.07	131.78
107.9	96.584	110.52	115.39	116.96	123.51	121.73	107.07	94.25	82.154	102.39	77.763	110.43	86.209
101.34	93.121	98.393	115.39	115.07	123.51	116.93	103.29	85.746	63.902	84.967	41.988	60.077	54.924
73.941	76.299	72.377	109.9	74.517	103.99	79.134	84.94	74.034	79.917	73.285	97.539	60.077	89.421
98.992	85.404	99.287	98.355	82.201	105.87	98.21	91.473	128.46	94.276	108.23	82.314	112.05	89.04
140.53	163.25	133.55	163.88	115.82	176.84	148.96	172.54	186.31	144.89	134.12	123.87	181.99	137.02
118	114.68	124.8	112.98	119.28	101.89	127.68	136.08	109.84	120.92	114.83	148.96	129.18	122.68
161.62	123.22	146.41	133.69	123.02	134.72	147.87	132.99	145.19	110.62	108.72	104.63	129.18	106.93
108.52	148.61	108.3	142.21	104.03	160	111.29	160.89	145.54	150.07	154.27	129.72	159.31	144.39
175.9	116.98	130.53	120.39	126.59	130.46	143.26	138.05	112.81	150.07	135.72	142.11	126.05	137.11
136.76	130.2	121.03	121.64	111.17	138.81	128.75	111.09	117.11	126.2	172.07	140.49	166.46	131.44
89.064	99.375	82.294	115.47	80.017	99.117	72.015	102.76	121.16	102.71	118.16	100.37	134.77	97.821
73.19	80.661	67.798	104.46	74.077	99.117	82.087	89.218	113.41	75.365	88.6	74.497	98.251	71.532
127.62	150.86	99.562	146.1	116.07	143.9	126.72	121.4	141.98	135.9	149.24	130.37	139.44	141.44
85.199	150.86	99.082	146.1	101.91	143.9	109.03	121.4	113.48	165.43	161.53	185.07	150.09	185.64
193.56	125.92	110.8	135.09	106.47	140.76	128.73	140.12	115.12	122.14	123.95	117.93	93.033	140.4
164.46	114.91	105.81	113.08	118.91	102.26	93.905	94.135	98.605	111.44	132.31	107.62	117.49	116.97
93.08	64.539	78.081	80.1	68.353	88.362	86.23	65.046	72.893	69.932	66.337	57.248	76.71	62.937
80.759	47.499	65.646	71.168	56.467	52.601	57.962	73.989	73.248	51.558	63.327	46.468	85.49	50.886
74.94	71.872	77.648	82.917	109.81	60.438	93.688	67.763	67.272	69.278	61.99	83.205	66.544	66.822
85.067	88.934	94.462	96.554	89.028	102.76	93.688	87.429	100.56	70.605	93.541	66.515	101.61	62.45
78.776	62.665	80.91	59.42	80.372	69.928	73.186	92.162	104.88	49.44	56.593	43.744	80.051	48.842
55.885	38.518	36.696	29.763	40.761	29.426	28.171	53.599	55.364	36.632	44.488	46.259	33.15	35.456
26.334	25.697	18.967	29.763	29.498	22.616	22.546	32.692	26.789	27.631	32.614	23.098	20.033	33.057
62.739	42.536	50.062	43.238	54.294	52	55.334	43.824	37.277	35.684	30.022	40.509	23.69	44.014
33.188	36.405	35.125	29.935	43.975	26.113	39.722	27.365	16.919	34.696	27.873	40.509	19.321	44.014
50.778	25.377	30.667	24.36	27.567	20.754	27.66	19.627	19.376	26.003	25.862	20.759	21.846	22.682
14.924	13.716	18.899	18.954	13.938	15.107	15.97	18.591	19.002	14.805	16.329	11.123	20.897	12.653
15.965	11.668	21.662	14.084	14.712	9.6225	17.407	12.598	12.319	10.063	10.879	9.0173	9.5865	7.8302
13.661	18.536	29.199	15.127	25.201	14.524	20.867	25.71	13.438	17.181	23.505	18.794	13.188	14.779
16.017	16.682	17.371	16.303	14.785	12.318	17.525	19.706	12.539	17.181	16.612	18.794	15.964	17.649
18.636	30.359	37.991	39.957	27.19	26.415	31.89	32.585	19.554	33.782	33.848	30.56	25.413	28.154
29.268	22.589	27.377	18.418	27.19	19.533	28.123	18.794	14.475	24.91	18.739	25.038	13.717	23.609
26.773	15.641	19.258	14.982	16.099	12.724	19.959	14.71	9.8793	11.112	13.053	11.727	10.726	15.726
26.773	18.126	22.297	17.491	22.819	15.611	22.136	24.606	11.26	17.215	17.794	24.584	11.962	15.978
17.105	13.515	12.292	16.257	10.653	10.834	13.335	13.077	9.0917	12.776	17.079	12.755	10.612	13.22
12.048	14.222	12.696	15.592	13.867	11.095	14.067	13.998	11.23	12.776	17.514	14.063	14.789	13.36
17.43	14.472	22.439	17.609	17.025	12.942	17.972	17.371	11.585	20.287	17.644	12.916	13.063	12.24
23.782	33.058	44.821	26.937	30.912	27.632	37.307	30.956	24.926	29.14	35.771	23.389	28.975	30.84
33.277	33.425	37.457	33.462	33.231	33.463	37.765	46.688	29.141	31.289	33.827	26.386	21.88	29.007
44.827	50.711	56.333	42.741	33.397	38.111	41.017	82.509	54.137	54.058	88.526	38.338	52.235	41.625
22.787	32.181	25.238	42.741	26.279	31.936	27.616	40.808	24.135	33.346	36.611	27.31	31.184	31.065
25.776	47.926	29.763	47.092	33.505	52.504	40.748	41.117	32.175	44.184	42.691	44.341	38.896	37.716
45.977	47.656	41.952	43.646	40.95	44.473	43.523	43.118	33.478	42.616	36.426	44.341	30.922	38.179
23.82	23.055	21.659	24.487	17.75	15.721	17.696	35.123	50.014	20.537	25.691	16.098	20.799	18.462
23.82	33.981	33.9	28.31	29.723	21.061	33.627	34.408	15.579	34.529	27.377	37.127	18.959	38.359
19.003	32.399	36.597	28.508	32.902	22.64	31.741	33.375	18.017	38.12	32.829	42.77	23.416	38.291
77.893	104.72	90.607	107.52	85.597	102.23	90.648	84.959	86.076	104.14	87.727	91.076	67.968	99.592
47.254	65.252	61.364	55.464	66.555	56.321	59.512	44.938	39.679	64.271	66.563	61.766	44.82	63.663
36.788	43.842	40.363	50.802	43.267	45.612	37.753	65.916	36.356	47.375	39.033	36.604	25.66	45.31
22.992	49.592	36.867	56.047	32.743	43.748	37.607	47.879	38.01	42.269	41.339	35.278	29.67	42.788
28.033	51.438	41.814	48.689	35.843	47.737	37.607	52.364	35.253	50.24	54.195	39.995	41.985	43.668
42.858	54.166	59.392	48.689	47.382	47.737	48.458	45.341	30.462	50.24	43.803	44.713	35.444	43.668
45.351	67.685	62.163	57.056	52.204	65.331	58.136	49.072	35.825	73.751	68.396	58.071	44.813	68.578
47.954	56.533	71.344	58.595	51.312	50.382	48.988	54.888	33.312	51.477	52.473	44.24	39.096	50.662
39.002	53.135	42.875	50.577	41.74	50.703	48.159	57.401	50.57	45.151	46.43	34.339	50.171	40.839
44.127	39.175	44.709	43.322	36.678	34.48	42.007	40.583	41.518	35.029	39.669	56.496	39.816	43.462
45.496	29.444	69.632	41.812	68.673	28.046	46.977	38.028	37.543	27.318	53.827	24.735	69.301	23.615
88.017	77.545	59.883	75.735	69.02	69.213	68.708	79.258	85.254	81.07	94.802	75.686	88.709	76.657
72.234	158.93	142.14	157.69	118.1	123.42	141.87	142.84	105.38	177.79	155.43	161.52	112.82	163.54
77.051	89.179	91.841	80.898	71.426	95.534	88.192	61.085	56.56	113.42	107.48	116.39	91.076	103.68
65.353	70.633	45.864	46.256	41.503	47.876	46.389	47.006	61.562	72.852	83.717	67.897	78.844	72.543
44.333	73.179	42.079	74.279	47.068	76.993	52.158	67.796	63.992	72.852	83.717	69.4	77.646	72.543
38.69	81.709	60.982	80.844	66.806	77.824	74.619	74.034	75.159	76.526	88.13	70.372	77.646	80.313
55.457	50.138	61.477	60.696	58.176	43.422	45.611	86.05	56.742	44.443	43.28	39.265	44.471	41.75
65.364	99.88	110.53	119.08	103.57	96.037	106.29	115.32	64.217	101.46	92.846	101.36	78.352	95.486
49.599	121.83	111.42	121.95	103.8	95.816	107.41	135.01	119.95	101.46	100.24	152.87	98.659	95.486
38.267	57.331	41.157	53.272	42.215	56.652	43.066	66.991	61.689	65.406	74.571	60.126	81.465	59.455
51.142	89.764	91.78	84.072	77.389	64.14	90.332	87.373	55.412	75.124	74.571	65.539	71.143	67.15
57.985	73.57	69.557	77.654	78.396	64.14	64.758	68.963	41.293	74.607	57.641	62.358	42.456	68.845
73.441	77.613	81.417	81.234	84.245	67.562	73.129	59.145	42.731	72.615	58.462	65.402	45.026	75.454
24.991	54.283	53.361	49.485	58.122	46.363	45.186	35.963	39.538	53.727	51.912	48.178	34.313	52.206
32.787	39.921	41.988	51.054	35.913	35.624	38.493	56.789	27.501	36.267	35.315	34.466	29.565	37.501
37.839	37.366	48.748	38.161	33.127	32.322	35.832	50.961	24.559	30.756	26.287	31.936	21.3	29.835
20.661	38.609	35.07	40.781	35.784	39.792	34.104	29.449	24.559	37.987	31.228	29.857	25.127	37.004
28.068	36.591	45.21	44.149	43.493	34.363	42.345	27.285	17.904	33.411	25.958	27.715	19.97	31.966
28.068	36.591	45.21	43.092	43.493	34.363	42.345	27.755	17.84	33.059	28.624	30.584	19.97	31.966
41.937	60.031	59.18	56.273	55.832	46.679	53.107	47.013	30.434	60.205	49.127	45.799	37.517	58.835
177.92	65.468	79.216	73.864	60.176	42.814	59.612	77.351	32.121	63.965	50.986	43.081	46.988	59.481
57.409	64.088	102.39	61.576	61.089	55.493	77.54	82.715	40.345	66.511	56.044	60.512	47.765	51.164
32.008	56.845	109.91	64.107	54.005	43.872	69.296	45.601	35.856	52.887	37.596	46.921	32.476	41.364
23.814	38.686	44.102	35.819	32.19	26.425	30.144	45.601	25.185	37.516	32.138	49.083	25.86	29.004
28.209	57.523	73.947	50.326	59.431	57	58.37	59.071	34.546	53.504	42.716	64.389	32.217	53.098
38.495	94.437	147.76	82.731	97.661	82.711	127.14	86.251	53.056	93.859	91.918	71.201	52.168	80.92
34.204	76.89	120.13	87.509	83.944	73.102	93.179	56.206	48.859	66.677	57.865	58.357	41.912	69.256
39.36	73.144	80.935	86.531	83.944	65.466	76.92	80.181	50.147	66.677	50.906	64.565	40.959	64.202
29.645	68.296	61.809	70.674	66.508	63.017	73.373	54.882	38.138	67.67	49.285	61.885	38.435	59.41
44.893	62.341	87.732	71.766	67.878	58.734	91.75	49.55	36.91	59.748	44.008	48.813	29.095	52.598
61.617	67.695	71.134	56.9	52.858	56.195	64.67	72.562	34.905	78.084	65.616	60.304	48.804	71.322
43.038	72.368	73.433	75.626	69.882	71.331	61.221	76.94	60.75	66.271	60.336	53.507	50.269	62.636
41.587	100.11	155.22	123.88	97.935	85.09	104.68	109.21	48.014	87.442	71.079	65.721	50.528	86.294
50.568	76.225	115.11	81.71	68.414	62.965	63.306	48.763	40.113	68.932	63.48	54.309	39.506	71.451
59.271	86.612	125.05	81.71	79.929	75.577	72.878	55.823	45.055	80.316	68.074	85.261	49.448	76.875
28.043	76.626	89.026	77.695	72.844	68.202	84.674	60.384	51.754	74.293	59.897	56.861	49.448	66.591
45.297	102.48	97.955	112.07	97.029	83.257	97.464	79.303	64.135	93.863	85.075	74.385	64.047	88.95
30.44	65.594	48.394	79.073	69.82	60.074	53.342	45.037	36.753	58.929	46.973	48.801	34.659	57.192
32.859	54.789	58.415	71.077	49.569	43.529	54.84	44.918	36.753	48.129	42.686	50.772	28.38	56.292
35.3	54.789	75.081	68.235	50.928	43.529	52.673	50.365	37.662	48.129	43.737	43.462	32.982	54.861
60.379	55.471	75.081	84.393	51.446	53.086	67.668	46.012	44.835	40.669	43.737	30.902	39.381	42.668
48.219	53.329	60.268	60.958	68.905	45.552	63.467	49.399	29.716	44.912	35.606	44.682	27.141	48.988
36.681	52.838	56.091	60.958	59.304	43.815	62.2	49.399	30.326	45.431	50.667	45.286	41.84	47.342
28.277	100.46	153.56	110.73	103.45	77.632	120.93	109.13	58.512	73.057	77.291	63.511	66.871	69.617
28.448	42.322	84.771	40.344	51.949	34.107	71.468	24.578	29.562	32.395	32.482	21.711	31.364	30.241
30.003	29.581	50.013	48.202	31.468	22.411	33.172	28.086	21.032	26.655	20.73	22.094	20.823	26.208
37.259	29.45	36.941	44.622	26.232	23.259	28.557	31.258	27.756	22.197	19.779	80.152	22.199	21.065
72.573	62.245	84.365	101.64	53.434	60.334	73.866	46.215	34.586	51.497	44.936	47.926	33.548	49.042
48.411	53.212	56.413	59.325	40.019	52.12	49.612	60.171	50.509	45.396	69.312	28.915	53.89	34.357
24.237	31.217	60.907	64.339	42.186	29.675	58.158	29.836	31.439	28.379	27.018	89.646	22.293	23.224
35.498	48.796	72.342	66.327	51.883	32.419	58.158	30.788	32.59	46.155	41.018	29.564	28.691	33.558
38.473	56.34	72.465	44.944	57.639	40.815	53.523	30.429	34.759	49.309	44.247	36.811	37.163	55.951
31.655	34.478	59.626	33.539	38.249	38.086	55.897	28.638	30.582	26.154	25.477	31.501	20.97	27.886
11.328	13.219	16.866	21.912	11.254	16.231	15.304	26.322	10.88	13.689	13.296	11.627	11.414	12.588
69.706	64.146	75.401	78.139	62.047	48.167	69.892	51.091	42.735	51.411	50.084	43.926	40.902	59.518
36.302	41.351	66.454	60.924	46.234	30.9	47.298	75.525	26.814	41.115	28.709	28.63	24.995	34.184
53.75	62.263	151.04	70.22	53.536	44.597	65.758	72.019	48.782	49.233	44.211	50.682	32.63	61.961
35.25	34.132	75.798	41.239	38.4	31.029	31.277	72.019	19.242	42.627	33.559	27.815	29.312	30.059
22.361	23.018	37.433	26.053	24.67	21.521	23.512	27.868	15.711	24.828	21.497	18.254	17.93	18.815
24.845	27.017	34.39	27.707	26.863	15.507	23.213	31.067	25.46	32.875	16.839	18.254	17.93	18.338
21.398	18.859	33.842	29.716	25.394	11.242	26.571	18.726	12.415	15.217	14.525	15.401	15.716	12.896
18.156	27.246	32.187	36.983	27.509	26.783	25.279	33.766	19.719	32.054	28.778	47.815	24.888	27.642
26.104	37.534	62.191	37.294	36.254	26.668	36.836	33.766	26.423	41.075	25.452	30.738	25.516	27.642
37.806	28.16	47.539	47.982	28.077	27.921	37.94	31.449	23.647	35.713	33.324	24.462	29.834	22.318
45.381	25.054	41.192	26.784	28.077	22.571	37.94	24.158	17.004	22.359	26.773	21.437	21.735	18.874
30.591	39.557	35.385	46.171	31.848	30.448	34.984	36.846	30.808	35.15	34.68	36.647	33.927	27.799
26.914	35.006	36.027	53.312	27.014	29.508	36.321	47.411	39.642	33.631	26.923	24.282	25.214	26.665
28.128	35.938	37.334	41.975	31.067	38.693	38.119	31.009	29.666	30.558	39.717	43.974	28.072	33.014
40.531	34.593	49.908	51.531	37.006	32.552	38.119	27.958	19.907	27.851	25.872	25.794	23.624	30.646
21.465	31.646	37.508	58.12	28.266	23.135	41.974	25.587	16.953	25.796	27.7	25.794	17.283	27.675
21.09	48.08	59.759	58.664	52.399	36.228	51.84	36.324	19.951	53.134	39.557	45.679	35.541	42.887
24.067	38.91	40.18	47.874	38.829	34.378	37.277	47.308	25.233	45.994	37.357	41.507	27.935	49.325
35.456	73.321	64.358	90.527	73.925	67.355	90.438	47.308	65.808	67.632	52.318	55.706	45.882	60.793
48.014	50.649	83.324	51.314	51.282	31.911	58.872	51.015	25.985	55.75	50.362	37.885	38.344	41.541
73.192	101.69	107.2	72.419	93.686	62.243	71.756	94.142	59.192	102.99	73.112	71.143	54.22	73.41
63.782	101.69	146.75	111.34	105.79	96.724	141.46	117.48	63.924	102.99	86.206	124.76	54.22	83.913
57.875	85.998	97.361	102.36	82.887	79.442	94.92	74.184	47.028	74.287	92.843	113.52	56.067	77.493
36.47	74.998	81.848	102.27	71.8	68.777	83.05	87.789	55.218	72.64	58.738	63.343	49.985	65.207
95.618	93.457	112.64	111.03	107.86	75.112	98.144	66.507	59.671	91.603	77.656	89.071	67.393	92.741
51.009	90.147	72.283	93.447	76.379	74.212	71.077	66.507	54.908	73.951	71.644	62.117	57.107	76.078
67.466	111.22	84.319	98.676	112.77	92.359	86.314	78.936	72.076	106.62	95.142	92.527	76.386	102.91
61.351	82.32	78.426	84.274	102.11	69.955	82.821	74.155	64.402	81.371	70.57	96.848	67.778	87.067
65.531	126.77	111.94	105.29	117.34	126.88	107.97	106.22	97.463	132.12	120.15	156.01	112.06	100.69
65.531	118.43	138.83	120.31	118.43	109.27	122.75	87.266	79.861	119.32	121.52	149.28	118.67	114.91
64.056	160.5	136.61	179.7	112.58	163.42	128.4	144.45	143.37	147.48	121.52	149.28	118.67	128.18
70.053	99.82	67.855	123.99	99.852	101.44	77.45	107.97	106.98	119.13	94.957	102.87	93.512	113.59
67.323	78.801	67.254	99.348	68.242	83.27	71.664	86.633	58.226	84.115	79.933	73.663	65.267	83.953
57.298	84.245	69.787	79.172	71.598	74.732	75.18	58.732	48.557	84.811	82.959	67.915	73.128	79.111
58.238	92.971	81.868	91.739	99.938	84.624	87.821	60.344	54.189	87.626	80.966	92.054	73.875	90.134
65.283	106.77	98.129	105.63	114.71	88.127	90.452	90.497	80.755	97.55	106.84	88.134	96.465	91.684
53.075	98.384	88.51	105.63	100.1	88.127	83.797	83.084	80.755	83.302	78.222	88.134	79.907	87.282
46.778	61.526	31.025	45.851	46.616	46.553	29.482	47.402	44.602	83.722	97.806	64.925	82.144	78.228
80.069	104.31	78.039	93.907	93.133	95.821	74.663	93.956	91.43	115.49	136.44	103.83	126.18	116.04
69.812	76.11	86.541	91.152	98.323	68.362	82.929	72.928	47.556	69.908	67.782	93.091	61.562	70.801
30.469	57.396	57.103	91.152	56.466	53.879	53.626	59.997	38.117	57.212	47.284	45.824	40.404	57.474
39.759	82.612	123.42	79.763	95.802	75.076	79.992	57.12	46.943	84.999	85.845	73.285	68.552	81.45
64.062	70.65	51.342	62.841	70.7	51.262	51.385	65.733	76.988	65.742	78.004	56.722	80.122	62.467
80.39	69.243	59.199	72.024	58.473	67.648	52.444	59.11	69.613	74.544	81.052	62.195	63.38	74.662
89.201	101.58	87.654	112.49	69.088	128.05	97.337	93.514	72.21	94.756	84.754	96.658	68.075	108.85
62.524	73.007	143.76	119.02	118.61	148.29	138.63	86.887	64.443	66.88	72.826	75.049	75.526	75.769
76.8	77.847	90.099	120.92	103.51	88.467	94.241	96.786	68.757	69.281	72.826	76.428	69.603	75.769
80.345	114.44	119.22	156.13	115.46	132.99	118.48	160.05	126.4	100.99	68.727	76.811	76.111	77.118
114.63	140.67	178.87	136.33	138.76	142.49	177.36	109.5	108.31	130.24	136.12	134.95	110.76	141.81
66.295	140	100.84	129.14	126.78	125.75	132.88	136.32	132.3	140.94	130.66	145.23	110.76	143.39
33.296	69.827	70.932	75.309	73.664	65.961	67.165	64.431	40.087	68.749	60.173	57.285	45.695	76.247
31.898	76.408	60.534	82.784	67.713	69.85	61.432	73.01	65.554	71.402	82.776	66.808	70.055	71.358
58.611	72.477	53.608	65.976	67.025	69.548	57.071	60.19	53.931	69.126	70.309	52.261	53.945	71.358
63.807	75.526	93.107	99.8	56.083	105.96	103.35	102.56	65.105	62.095	48.201	41.049	46.054	46.364
44.577	62.711	55.088	69.044	59.495	77.436	64.095	133.53	94.258	62.095	46.61	39.105	59.779	43.717
89.978	93.853	101.14	78.499	91.329	79.463	110.53	79.829	55.222	79.973	75.134	85.154	87.267	83.807
73.976	75.78	66.978	84.797	58.812	73.775	63.143	89.688	83.562	70.001	78.527	78.654	105.68	57.597
62.674	104.06	75.758	98.273	96.277	101.08	94.555	86.965	91.733	108.14	118.76	128.9	94.252	117.34
95.637	91.843	89.663	94.32	88.025	105.85	103.42	119.55	132.76	102.06	93.934	124.44	105.2	117.34
94.833	83.509	92.833	88.421	105.52	105.85	94.976	109.27	98.665	75.523	100.99	85.12	100.63	79.719
85.649	133.23	91.861	113.86	105.52	117.93	89.895	157.15	144.76	117.09	128.65	90.501	136.29	96.568
57.975	104.72	78.154	112.4	86.254	101.25	66.527	127.62	133.76	89.306	125.32	90.501	145.43	84.019
66.956	143.14	207.86	131.6	166.58	99.248	170.19	129.93	114.44	138.38	125.05	144.26	132.53	147.05
36.962	75.6	41.414	78.245	47.983	49.465	42.8	69.259	58.931	76.792	81.288	72.148	66.71	78.334
30.278	53.899	47.933	55.396	49.823	43.604	48.222	40.998	28.879	53.443	39.783	57.247	30.356	53.174
94.786	88.811	146.22	72.068	82.5	58.768	137.8	81.111	87.931	80.322	82.327	76.441	65.152	65.753
60.919	88.261	112.38	105.02	84.578	66.393	95.621	106.06	72.243	73.561	75.821	67.032	55.03	71.17
49.981	59.792	66.507	69.118	54.023	39.063	60.226	61.507	35.379	54.928	41.665	42.263	34.35	50.859
47.091	71.616	79.634	63.123	87.928	53.778	71.8	78.606	37.629	73.679	62.338	64.626	40.646	57.273
39.639	60.435	70.517	73.194	59.918	46.154	53.423	119.56	50.014	47.793	48.458	61.208	39.239	44.728
39.639	60.435	70.517	58.485	61.146	57.994	62.024	45.16	35.047	52.752	46.503	52.998	31.642	60.176
45.98	61.845	74.138	79.501	81.488	57.994	65.522	45.296	41.528	69.318	52.737	59.687	40.725	68.601
64.236	61.599	50.667	75.006	49.904	51.906	53.759	51.991	45.95	55.861	52.737	53.3	54.223	60.029
82.147	90.695	81.639	95.523	102.48	85.638	88.096	79.5	68.423	86.137	83.756	80.954	78.606	74.112
58.641	101.28	50.419	95.523	71.153	89.097	69.243	79.5	75.889	94.292	95.02	107.26	78.606	101.13
86.7	63.607	73.316	54.702	56.178	52.884	62.642	62.58	48.015	76.466	80.949	62.316	80.476	73.053
59.164	107.1	68.869	102.91	82.248	94.226	69.919	111.17	88.656	108.19	102.39	98.536	95.542	95.242
47.188	102.35	68.869	94.239	87.385	102.3	84.511	88.247	73.555	88.426	88.284	77.17	82.757	90.192
83.121	68.701	70.998	68.342	65.281	64.04	74.721	66.772	49.199	71.784	69.668	72.081	42.021	77.167
41.685	65.431	43.509	68.342	63.786	57.99	59.06	66.772	46.935	64.688	69.668	63.592	42.021	73.291
103.65	126.35	79.338	127.63	104.2	122.71	96.6	100.01	78.037	129.9	145.97	126.44	107.3	126.59
62.031	54.977	57.814	89.338	59.254	66.624	72.55	52.59	51.06	62.147	70.041	60.532	53.713	54.91
51.291	63.193	47.455	89.338	60.608	91.334	72.55	62.528	53.122	67.809	80.479	60.721	71.978	54.91
184.79	150.97	138.55	154.39	111.08	165.62	139.86	152.9	170.13	172	166.96	149.65	191.35	140.46
199.6	123.96	188.71	125.64	158.01	132.54	164.73	125.75	129.56	124.67	105.01	133.7	100.1	132.45
67.484	70.499	61.098	64.834	68.241	79.236	61.75	74.61	105.36	72.066	73.466	64.53	85.887	86.866
103.08	112.83	93.044	121.14	97.147	116.54	92.381	140.03	102.86	118.1	121.63	105.83	120.67	111.14
80.076	111.71	68.235	109.06	97.147	118.96	84.525	111.25	100.57	111.35	122.72	104.31	102.25	114.94
57.896	71.042	44.088	105.23	49.561	89.133	61.222	107.76	108.7	70.666	76.153	59.788	83.436	72.029
83.057	71.042	75.765	105.23	69.367	81.313	90.675	107.76	111.71	50.216	74.502	58.93	86.18	48.96
54.681	33.077	44.634	66.956	32.656	42.536	33.98	82.825	72.865	35.226	42.339	58.93	56.668	28.526
75.05	164.59	92.742	144.21	117.08	124.02	115.49	117.35	102.05	171.05	165.79	145.1	139.65	153.74
98.273	146.38	71.86	132.6	85.596	124.02	79.369	139.24	126.46	144.58	152.56	124.95	136.54	152.04
84.347	71.466	64.075	81.247	66.21	94.011	72.915	83.768	93.209	67.06	62.325	54.742	80.518	57.584
127.64	85.251	103.41	108.62	96.414	107.78	78.014	89.792	107.81	78.883	84.072	81.996	76.928	89.215
127.14	69.988	93.719	98.221	87.217	79.269	114.2	91.135	96.584	71.042	71.048	61.104	94.244	64.347
131.05	132.22	114.84	127.33	116.72	129.6	125.33	125.95	111.66	120.92	151.63	120.82	158.66	118.91
129.32	110.87	102.13	95.716	90.757	83.221	119.47	131.06	120.5	121.34	151.38	125.8	162.21	109.6
109.24	108.29	122.06	121.45	121.24	113.52	119.47	115.34	128.43	105.98	122.6	95.264	123.84	105.94
95.351	73.927	71.452	82.042	55.552	62.805	71.88	71.812	62.997	72.582	82.069	80.038	84.859	76.868
201.64	85.481	116.4	93.181	93.795	84.586	123.25	71.492	87.111	74.407	73.218	76.896	58.836	80.865
147.65	92.097	116.4	115.58	125.22	89.648	126.4	85.603	86.217	78.516	80.354	85.915	67.951	86.627
78.018	106.73	78.586	86.336	96.584	81.764	85.923	61.367	48.079	107.9	120.43	125.01	76.314	118
51.697	89.383	53.99	76.453	62.882	68.015	63.729	118.44	63.405	87.593	105.84	65.993	84.773	70.271
98.372	110.53	133.74	121.58	96.452	107.71	101.27	91.007	79.694	107.11	85.604	92.703	63.338	102.72
47.475	39.732	45.19	42.052	32.399	28.703	33.452	79.205	32.179	42.087	40.111	35.257	28.995	27.621
137.79	122.23	124.34	116.91	128.94	104.66	131.76	87.615	59.065	119.07	89.593	90.138	64.279	123.82
69.967	124.02	136.55	132.25	124.79	95.309	152.01	108.32	82.868	116.53	130.74	90.599	96.413	115.63
35.551	55.423	42.877	69.968	46.194	59.495	49.248	66.441	53.496	49.918	61.404	81.21	49.812	50.076
26.536	33.332	27.36	31.24	26.034	32.925	24.438	33.407	30.857	32.859	37.018	115	28.23	29.707
45.319	30.51	44.437	29.2	41.383	33.169	38.519	33.407	31.935	33.726	32.989	48.377	28.779	29.707
79.649	90.877	86.304	99.898	106.24	94.705	107.18	98.729	88.035	103.09	87.274	92.844	79.912	105.07
70.338	59.063	69.866	68.436	80.491	48.07	78.972	67.455	64.396	55.709	64.767	92.844	71.397	69.348
86.596	59.063	69.866	72.947	64.241	46.003	62.072	75.473	76.689	53.387	69.917	48.593	82.183	47.916
77.002	88.647	92.936	79.001	102.9	82.532	95.301	86.288	89.468	87.904	85.857	83.421	85.045	87.523
112.43	76.314	90.317	86.762	79.534	76.156	95.301	78.803	74.366	84.699	72.508	79.773	72.407	76.771
102.46	98.9	102.23	101.62	92.149	84.349	97.939	139.77	108.52	101.84	109.89	89.026	122.83	104.25
147.89	99.53	108.45	113.62	121.51	100.5	110.02	131.6	149.32	110.23	107.08	118.72	127.82	119.18
113.48	85.335	109.71	117.47	98.388	109.24	123.34	112.16	132.19	74.886	104.81	77.821	125.56	69.274
80.139	75.536	77.117	114.71	74.719	116.37	93.206	95.556	107.61	72.961	79.383	71.635	68.867	70.577
91.273	74.849	104.13	115.23	107.6	116.37	127.9	95.583	84.282	80.506	77.336	71.635	100.06	70.577
97.889	48.54	78.977	84.713	90.621	86.785	85.239	77.538	72.803	42.769	48.296	47.424	44.79	40.591
58.922	56.718	71.883	66.531	84.19	49.135	102.18	74.844	45.142	67.391	64.914	57.702	75.59	48.068
77.684	97.266	141.28	136.42	115.7	94.976	148.5	107.74	94.858	85.306	81.905	86.63	75.267	102.76
134.42	116.05	146.59	134.19	114.8	147.55	132.97	114.28	107.29	110.51	105.98	103.77	95.047	105.51
108.51	122.96	119.21	102.46	115.56	98.924	108.9	110.93	104.33	130.37	113.45	126.35	95.047	129.11
122.32	78.93	88.568	99.646	96.141	104.21	106.02	105.21	82.743	70.143	56.8	67.012	65.58	63.545
111.83	101.08	82.371	112.29	97.529	97.013	100.84	98.689	85.531	87.758	88.239	96.024	59.611	100.63
79.274	110.78	121.11	127.79	116.13	127.44	121.84	133.16	121.97	89.136	80.023	82.745	86.28	87.674
53.823	92.672	65.839	82.665	61.273	95.472	65.15	113.14	121.97	82.794	81.491	70.584	120.21	75.563
79.717	91.793	70.461	79.969	65.599	81.631	69.783	88.344	124.91	104	122.4	82.37	155.38	100.81
125.29	81.533	94.106	97.114	85.815	89.73	100.3	88.344	99.617	86.215	82.805	60.816	79.441	65.439
101.66	96.556	109.66	103.02	104.79	111.95	111.17	112.57	93.162	95.174	88.708	102.81	75.911	95.388
97.553	65.674	85.729	44.703	63.085	47.561	71.973	59.625	52.105	72.502	65.987	67.717	60.831	65.114
82.662	74.238	74.899	78.355	65.106	53.911	66.528	71.537	75.852	80.82	82.837	67.717	84.937	71.217
87.523	86.459	67.381	100.08	69.851	102.92	79.557	101.05	81.666	89.184	90.661	88.086	93.375	83.84
99.101	67.276	97.138	86.427	85.009	86.915	105.8	68.144	65.41	63.815	64.704	60.102	71.24	56.864
95.251	74.648	105.96	102.25	110.6	86.915	114.57	77.182	82.704	75.9	56.585	75.215	51.57	87.966
57.213	36.849	52.894	48.117	65.836	29.037	60.844	46.735	19.681	43.35	37.391	59.476	38.504	43.046
31.382	22.667	26.231	28.845	35.825	17.332	22.617	25.541	15.2	24.222	22.074	33.972	24.5	31.117
59.039	44.968	58.653	48.207	56.693	41.797	56.605	29.64	23.232	43.435	38.119	50.926	30.397	49.686
68.735	72.958	60.522	74.406	79.034	67.307	83.852	67.253	78.65	69.454	62.891	73.334	70.43	67.293
38.485	33.423	39.153	50.769	31.189	29.6	35.222	29.158	25.597	38.52	39.303	38.546	26.983	36.251
51.054	34.536	42.34	50.769	29.918	35.177	39.503	56.718	49.313	38.52	43.433	38.546	41.305	36.251
81.128	91.963	81.924	100.11	60.96	98.729	78.949	109.19	106.56	72.975	84.466	48.016	99.889	63.481
166.4	90.37	119.9	106.33	81.097	95.735	104.44	86.652	106.79	71.454	82.129	66.192	99.889	80.521
88.351	106.93	96.123	106.33	94.259	95.735	104.44	95.247	104.01	125.65	112.35	132.48	112.56	124.13
88.351	83.788	82.463	93.079	72.762	89.453	86.02	80.634	118.86	81.744	97.038	98.808	102.62	88.551
79.397	82.453	82.463	69.878	61.059	83.719	69.602	107.25	129.09	58.815	75.154	55.547	100.05	64.891
132.01	184.18	127.97	176.16	116.54	168.83	131.58	146.98	155.42	168.07	195.21	143.14	185.83	161.76
109.86	88.885	89.361	98.348	100.26	80.316	91.642	91.759	81.119	90.501	112.41	98.544	116.57	90.547
58.561	57.421	48.929	66.043	66.486	52.596	53.324	62.835	68.731	59.342	60.632	60.822	63.407	48.817
78.797	83.817	49.952	93.577	53.164	85.192	54.679	81.693	83.195	87.587	102.73	80.444	80.209	80.003
137.31	82.95	130.74	93.124	91.987	85.192	120.89	76.506	75.982	80.861	92.273	72.961	89.844	76.467
111.3	85.041	110.48	82.371	142.99	75.114	108.21	76.83	75.399	76.598	66.784	102.69	66.987	81.25
104.01	80.402	85.362	106.76	89.735	92.581	102.3	98.236	95.823	73.083	80.986	68.92	92.696	66.157
57.018	47.934	63.432	52.908	80.726	47.114	67.132	59.623	62.279	43.641	46.614	45.028	54.405	48.038
53.928	34.013	41.611	36.87	43.426	40.259	40.384	41.221	50.757	33.372	41.051	33.368	35.136	36.021
31.726	28.37	36.647	34.886	25.518	26.526	35.921	35.023	33.935	27.147	44.725	22.645	29.052	31.061
65.501	36.74	31.777	51.832	30.77	41.027	41.598	33.836	31.514	41.568	42.592	44.522	51.342	42.983
31.585	36.74	34.328	42.128	34.368	36.664	41.598	29.94	26.016	33.256	30.761	33.132	25.324	35.702
45.142	40.964	48.976	40.871	39.263	31.19	44.63	23.02	15.697	42.506	35.941	38.38	18.801	43.972
37.277	43.922	50.067	62.206	39.263	54.166	53.718	46.471	36.8	42.722	38.113	42.749	28.029	43.972
12.698	26.292	18.717	34.284	21.045	18.146	20.81	30.943	17.602	22.322	20.43	112.38	14.439	20.026
20.655	25.351	28.848	39.28	25.724	16.435	25.824	25.714	15.785	23.559	20.292	24.246	14.463	17.192
18.591	32.63	51.978	35.797	37.047	27.243	49.962	32.875	17.426	40.446	26.564	32.128	19.547	33.537
19.582	22.63	38.473	34.074	22.848	20.494	26.955	22.562	17.426	26.702	15.663	24.114	10.926	29.22
15.364	26.999	30.856	34.888	21.902	23.733	27.821	33.261	25.915	32.615	21.056	25.928	15.862	22.315
15.364	18.788	21.252	19.518	20.851	14.682	18.632	35.359	13.226	21.621	15.31	19.699	10.314	22.315
50.148	26.787	41.147	28.135	37.247	22.916	36.932	35.893	19.462	30.893	23.916	35.573	16.153	29.406
23.107	26.696	29.83	25.855	23.707	22.132	31.753	25.629	19.027	25.109	23.916	59.876	21.01	23.282
28.507	71.922	85.71	79.734	80.294	68.721	73.956	67.548	38.464	60.959	48.71	84.929	38.899	61.485
32.116	41.357	52.4	41.767	44.397	35.257	42.147	39.303	22.279	37.677	35.249	34.502	27.351	37
26.485	37.181	53.035	48.848	35.083	42.199	44.887	54.337	30.519	32.102	33.601	53.153	24.511	38.771
26.749	37.181	25.071	52.691	20.025	42.199	28.909	50.372	29.273	27.41	33.601	23.703	35.834	26.531
78.84	46.625	68.441	60.391	61.101	45.17	62.506	50.372	34.448	53.392	46.384	52.757	38.09	53.796
56.756	50.141	51.578	81.96	61.655	56.656	49.137	77.761	104.66	52.259	51.952	45.123	76.349	50.234
113.75	100.78	103.63	114.29	98.276	119.91	112.31	123.02	140.66	73.464	84.061	85.545	112.05	68.209
38.226	59.574	54.778	65.524	72.943	59.444	63.739	61.938	57.234	51.186	49.797	62.916	59.064	61.242
48.914	43.103	40.788	41.518	61.462	46.015	51.957	51.96	39.607	43.3	39.054	35.93	34.448	41.645
76.624	71.765	75.271	100.82	73.242	105.22	80.448	90.744	95.867	69.291	72.44	41.256	73.634	57.373
77.465	53.99	72.667	60.925	61.669	60.853	61.108	70.063	60.564	56.505	54.441	52.498	53.127	64.858
69.255	53.99	61.632	59.635	56.734	64.091	59.926	70.063	92.516	56.505	54.441	52.498	68.53	53.996
74.167	72.113	77.551	84.581	74.264	95.17	92.155	86.405	71.105	70.295	89.155	58.767	94.37	58.779
92.363	126.3	77.551	131.55	109.35	124.26	110.25	120.01	107.35	118.29	111	119.75	98.92	122.83
82.31	53.636	73.894	70.857	56.657	62.371	69.69	62.966	97.468	48.16	70.797	52.742	75.506	47.511
102.53	46.961	101.18	68.899	77.392	66.553	105.13	78.515	71.504	52.687	65.657	41.769	75.3	39.16
73.567	49.702	76.815	73.291	66.649	67.26	80.898	87.767	77.855	39.334	48.051	39.131	46.671	38.929
122.59	113.07	106.72	105.87	121.38	121.04	117.43	132.08	120.91	95.695	84.832	111.92	101.3	104.3
175.96	157.88	134.24	131.34	108.27	144.48	132.22	164.53	207.75	159.29	182.45	122.88	221.09	148.98
97.736	84.051	66.345	71.294	58.881	79.212	71.758	62.338	67.664	80.857	78.005	77.55	73.041	85.54
144.74	78.022	103.26	90.098	56.47	94.137	81.19	82.787	112.22	67.891	83.573	52.623	125	61.348
76.997	88.508	67.625	89.416	64.091	105.09	73.248	118.06	112.56	91.126	83.197	75.826	105.5	83.747
62.049	56.036	55.742	57.105	59.937	63.219	63.032	96.752	104.5	49.237	54.151	50.64	54.624	42.891
77.49	50.672	63.402	62.567	81.452	60.91	78.226	44.065	50.822	58.16	64.703	68.828	63.254	62.972
96.953	69.69	109.17	100.33	94.313	88.163	90.001	72.715	80.652	63.032	63.185	74.819	71.761	72.357
76.644	68.238	103.52	80.099	98.695	73.212	116.27	77.411	94.906	63.636	63.185	70.546	71.761	66.078
79.11	52.327	73.272	74.96	59.782	62.197	75.794	64.773	56.707	55.553	60.062	59.335	53.569	59.723
62.768	58.664	47.057	60.407	57.771	55.5	61.021	57.954	54.81	63.262	69.722	55.26	53.324	59.723
69.365	67.73	55.822	66.198	50.879	58.271	64.946	67.22	66.184	47.682	68.459	37.557	51.367	39.855
28.643	25.7	31.149	38.766	31.114	19.234	30.594	17.815	12.946	28.995	27.024	30.231	18.357	28.5
27.358	6.5811	15.682	25.069	14.488	6.8355	11.929	13.611	7.4531	9.5398	6.4604	9.7959	7.0727	28.346
38.47	13.555	16.154	25.069	14.488	10.636	10.873	13.875	6.2562	19.624	17.312	13.518	8.7599	13.737
48.875	28.196	35.747	30.332	27.566	26.957	37.27	21.809	17.078	32.596	19.966	31.8	13.074	28.398
28.466	29.942	32.748	32.547	26.299	31.663	33.503	19.824	14.708	31.757	19.79	23.484	14.303	29.345
32.543	32.514	32.082	36.342	26.381	31.396	26.762	27.439	20.958	39.009	31.14	29.735	19.801	35.212
29.146	49.362	55.376	42.582	41.515	40.26	39.139	74.28	29.41	49.676	34.465	36.998	25.632	38.013
26.777	28.557	29.664	36.875	31.188	24.668	26.096	25.385	19.868	33.545	28.066	39.468	19.234	32.838
40.748	42.757	49.28	50.714	48.789	37.211	49.446	30.506	24.377	46.272	39.744	34.467	29.989	38.47
26.97	61.832	43.356	56.599	49.226	56.723	49.446	54.508	39.178	58.32	57.515	51.171	46.049	56.842
30.321	28.204	28.85	26.374	24.985	27.152	25.292	26.425	16.094	38.492	24.007	33.427	21.706	32.943
31.52	70.607	42.114	76.731	39.367	81.348	47.927	103.45	107.56	65.544	90.019	57.862	112.47	64.531
79.115	69.28	56.56	94.375	98.065	70.33	76.345	97.805	80.086	57.177	54.062	64.18	71.927	60.549
97.02	57.305	58.258	70.84	55.062	68.429	69.067	66.368	74.076	57.177	62.418	55.444	59.172	54.135
127.21	88.802	102.02	100.2	86.183	87.988	97.789	84.829	76.37	93.268	67.31	88.233	75.681	89.745
72.575	90.068	51.525	89.67	53.346	92.54	53.835	95.127	92.566	90.143	105.66	84.341	103.45	87.593
124.72	81.748	84.894	85.499	53.346	90.219	78.982	93.52	114.9	80.83	103.88	76.905	125.24	81.706
122.41	93.971	145.25	137.51	135.9	136.08	167.42	113	102.9	80.83	74.108	65.269	88.54	65.421
105.08	90.097	115.15	141.49	104.83	127.83	141.23	132.06	102.9	83.326	70.147	65.269	90.044	69.666
71.007	84.875	75.096	97.718	100.02	94.111	100.36	75.991	84.173	68.6	58.256	112.97	62.438	84.601
82.98	46.775	60.133	66.123	49.564	63.818	71.135	62.049	80.86	46.12	46.767	40.441	57.858	47.736
88.505	126.18	80.734	129.46	117.43	127.69	117.4	127.69	133.07	120.43	102.69	110.83	97.471	126.94
59.425	61.101	63.638	83.066	61.22	68.309	78.567	81.165	49.181	64.537	68.35	64.56	66.534	57.828
49.149	47.676	44.716	52.174	53.732	41.565	50.487	46.787	47.276	44.021	42.754	46.339	40.854	40.03
38.371	29.164	33.735	29.847	34.821	27.105	28.896	46.219	32.84	26.334	27.87	41.339	32.01	31.472
53.606	32.507	47.179	46.343	44.544	34.558	37.116	48.049	48.157	33.651	32.726	26.877	44.609	27.243
39.674	32.507	33.756	48.239	37.762	38.564	37.116	34.89	29.92	25.894	32.365	26.877	25.551	26.38
29.449	27.734	20.914	26.461	17.395	17.997	18.193	22.16	19.029	26.185	38.95	22.179	29.239	25.368
28.934	32.942	33.109	39.983	28.417	28.294	32.382	25.986	18.773	32.326	38.95	66.897	29.239	33.189
85.294	97.86	101	133.93	87.236	74.066	87.3	124.36	67.29	83.312	64.839	75.845	52.447	82.049
46.117	79.746	59.176	72.069	69.461	74.066	78.043	60.059	57.692	68.565	64.839	65.831	52.946	60.04
23.703	41.635	34.119	45.394	39.007	42.5	53.529	40.421	32.763	33.192	41.999	28.047	29.893	39.629
35.959	58.668	47.87	55.071	49.869	55.558	53.529	49.2	34.354	66.546	56.74	59.206	41.843	57.825
38.009	67.931	49.664	71.532	57.75	67.48	61.016	95.143	63.15	66.546	62.137	93.806	44.538	61.92
38.009	60.637	48.575	54.828	48.29	56.54	46.538	66.773	79.932	45.433	53.316	41.151	71.181	40.906
66.279	94.205	76.131	83.902	79.254	100.72	85.895	104.8	102.26	86.438	85.026	75.341	83.438	84.891
79.553	89.656	78.407	106.1	63.873	84.38	84.894	104.8	109.35	86.963	98.731	70.722	105.13	77.783
89.254	122.93	90.43	106.28	87.766	118	86.388	119.21	151.12	133.61	138.83	118.53	139.53	136.63
81.585	42.358	69.493	41.629	69.503	50.32	52.976	65.122	79.568	49.783	50.118	47.114	64.981	41.41
80.299	58.56	59.054	61.374	62.575	67.716	55.538	69.613	79.568	58.917	56.665	45.4	63.274	52.131
50.988	59.951	50.899	80.22	74.889	70.833	71.003	76.4	77.542	46.76	73.35	39.843	72.264	36.697
26.119	48.994	60.991	78.507	60.654	82.892	87.46	70.472	55.262	44.078	43.371	30.002	38.662	45.711
61.529	73.909	106.99	112.91	106.33	100.25	128.59	79.088	41.9	76.315	46.067	84.217	30.82	79.161
15.304	16.922	19.821	34.899	20.1	14.973	20.217	27.068	17.419	18.551	16.697	31.109	17.311	20.765
38.166	28.3	31.953	52.204	35.732	19.341	28.588	25.485	18.028	31.283	27.601	30.963	23.015	29.584
33.836	23.34	24.915	23.708	28.476	23.354	23.97	15.529	13.764	31.039	26.706	118.84	15.364	30.885
21.897	19.245	19.263	21.361	15.897	15.107	18.702	18.101	13.55	23.155	18.465	36.004	12.965	19.69
21.435	24.834	19.3	32.625	19.246	16.899	20.368	20.346	14.411	27.725	21.842	28.767	14.135	29.534
18.52	17.8	17.435	44.117	23.433	15.449	17.623	26.04	29.437	15.29	20.715	17.427	13.503	15.387
20.086	9.5874	14.759	10.156	13.174	8.5665	14.398	9.3346	9.225	11.475	13.838	9.4873	10.735	11.661
31.53	21.574	24.115	24.642	16.167	24.192	26.992	36.077	47.097	17.59	24.11	15.226	24.255	20.759
20.409	19.7	20.015	31.207	14.531	19.179	16.506	20.494	15.573	20.361	18.264	13.955	14.851	17.429
23.788	16.903	16.544	31.215	14.224	15.821	16.067	12.71	13.153	18.657	15.544	13.727	16.433	17.75
26.262	25.151	23.837	34.888	23.079	18.799	21.426	29.349	22.766	24.412	20.103	20.795	15.333	26.817
25.651	16.846	17.509	41.002	14.159	14.739	13.292	28.145	17.935	17.585	20.103	14.601	15.333	15.344
19.141	14.572	16.241	26.381	14.159	10.55	17.042	28.145	17.935	13.987	14.02	12.155	8.5915	12.311
17.732	11.657	13.264	25.917	12.947	9.9403	17.042	13.938	11.192	11.363	11.638	10.105	8.0907	11.91
17.856	6.9433	9.8153	14.745	11.551	8.2013	12.338	6.4205	4.9785	7.7622	7.3042	10.166	5.3919	8.0326
22.584	19.555	17.781	22.406	17.98	18.468	22.361	11.45	9.5072	24.806	18.762	21.824	13.096	20.594
22.785	36.572	34.039	49.13	29.273	30.148	35.524	30.782	16.7	36.327	29.652	34.252	18.503	33.556
15.892	17.76	34.807	19.738	21.443	15.625	27.551	16.015	13.395	15.923	16.393	16.217	11.769	23.992
21.592	23.905	35.75	29.239	29.091	21.043	31.738	24.808	16.462	18.971	17.328	18.543	14.065	23.992
19.873	24.344	35.287	49.887	29.091	18.362	28.641	17.377	15.096	16.666	17.328	20.73	12.572	18.061
30.347	24.529	33.118	34.934	22.495	19.021	25.814	22.552	19.233	24.963	22.768	15.931	17.514	20.998
52.687	59.444	91.698	53.202	65.142	54.047	63.051	54.182	32.419	69.067	42.886	45.749	32.918	46.894
20.887	34.284	37.63	37.94	43.062	30.427	31.783	40.768	23.969	37.546	29.264	32.887	20.486	31.907
31.937	45.068	45.187	49.094	43.062	46.544	48.127	38.126	25.594	40.764	33.99	41.038	26.76	43.153
37.471	59.165	54.396	55.933	54.367	48.01	50.604	62.501	36.996	54.538	52.107	49.568	38.479	54.529
21.316	52.36	46.128	51.749	48.441	44.881	45.249	46.553	30.901	54.538	50.94	55.835	32.736	56.76
29.187	59.061	57.029	87.766	48.07	54.339	55.156	60.603	51.763	57.184	54.696	67.523	45.852	59.553
32.732	69.157	48.247	72.534	53.233	70.022	56.302	59.418	50.277	75.588	69.292	74.327	48.123	75.096
51.281	120.77	128.61	119.56	105.27	110.14	119.02	83.398	71.54	112.61	96.31	108.31	70.183	99.063
75.036	112.79	124.6	106.28	113.53	91.074	113.39	110.21	79.156	97.735	88.602	75.711	76.527	88.197
38.863	42.275	61.975	78.869	55.102	48.838	65.764	61.729	36.043	37.204	32.51	38.34	32.104	37.532
23.208	52.523	58.662	59.473	51.189	49.286	51.751	53.094	43.68	45.797	44.526	31.043	32.663	41.742
74.272	127.75	131.76	151.01	114.82	102.87	144.95	117.69	91.595	97.849	106.05	99.943	88.312	104.39
74.272	42.176	67.776	58.538	44.536	53.547	69.523	64.281	66.46	34.598	60.02	37.19	68.61	40.353
74.676	71.044	106.41	121.36	83.186	73.819	97.573	103.09	81.248	51.293	60.529	50.235	55.556	50.41
99.401	68.653	119.38	96.205	121.14	71.914	134.63	88.298	103.65	63.875	76.198	64.562	115.4	63.613
78.449	73.989	70.477	84.818	68.062	103.88	77.502	88.3	97.657	80.398	96.026	67.377	108.12	78.234
163.38	122.83	166.17	120.17	112.55	141.65	156.41	151.54	163.29	104.13	107.83	96.772	105.94	96.286
94.31	90.071	93.675	96.271	90.03	92.688	97.099	73.779	101.7	82.843	72.316	77.938	71.055	78.426
78.084	57.136	64.704	73.347	68.312	93.097	79.335	78.872	71.729	44.69	40.898	52.032	50.729	46.118
84.044	62.729	64.704	73.347	60.471	78.504	68.617	73.39	91.46	59.801	61.755	82.274	75.257	71.378
88.168	86.863	114.23	98.358	97.313	94.64	120.52	86.601	92.176	110	92.801	104.26	82.061	94.408
69.532	98.58	77.195	86.843	116.53	91.704	92.6	95.22	88.409	85.564	84.838	99.773	86.198	110.26
68.997	60.257	39.718	97.449	47.778	94.024	44.697	74.974	94.603	45.453	62.612	49.028	70.908	53.101
76.448	71.458	83.33	108.89	94.987	94.024	97.846	95.881	94.731	54.71	68.237	49.166	78.411	54.241
169.34	151.98	160.91	148.5	152.06	150.26	175.89	147.29	162.82	149.76	158.77	144.52	174.1	148.8
88.203	176.09	99.66	148.5	119.33	178.16	122.81	177.99	181.51	157.87	173.04	137.39	176.85	163.58
140.21	153.68	186.59	137.62	167.54	148.73	179.93	146.33	151.96	130.35	133.51	136.67	128.73	144.8
146.11	126.41	175.64	143.21	126.34	140.32	160.85	140.26	147.24	97.444	122.7	90.758	157.07	94.706
94.113	86.881	116.25	128.63	87.926	122.4	120.86	122.49	119.3	65.63	71.46	58.492	87.966	57.507
88.756	107.81	85.561	82.906	70.545	102.57	85.386	121.29	148.74	88.091	117.97	62.947	135.28	78.383
109.9	98.107	119.97	135.06	84.117	133.84	148.12	109.23	126.5	89.214	83.615	72.163	98.111	79.21
94.16	96.828	141.87	109.61	116.07	108.79	139.77	92.5	90.447	95.871	96.433	94.894	99.397	95.083
105.36	93.957	132.13	109.73	142.92	114.96	139.4	92.5	78.937	98.939	88.713	117.72	98.644	95.083
78.725	62.702	75.34	87.1	78.538	74.181	84.78	82.209	61.383	59.497	56.874	58.315	57.722	65.249
79.878	106.76	133	125.16	158.98	137.5	165.72	127.1	119.99	93.949	91.993	95.617	109.76	94.906
66.027	67.246	59.661	57.276	74.447	48.593	60.307	70.792	88.84	62.869	82.732	80.406	85.218	71.5
43.795	41.857	28.335	45.943	39.565	34.464	31.122	29.879	22.875	36.657	35.649	42.829	29.173	39.939
30.837	27.885	37.083	46.242	38.547	21.025	32.361	19.12	16.076	26.877	20.63	30.705	20.504	26.195
30.937	24.904	32.036	25.734	24.731	21.025	29.015	18.558	15.258	29.446	25.578	30.63	17.332	27.681
59.093	35.512	44.731	34.794	44.925	44.663	44.34	41.664	27.691	41.134	36.546	42.411	32.237	36.951
48.371	31.355	25.354	33.193	19.115	25.724	26.492	27.061	18.687	38.789	36.373	39.121	32.278	44.057
15.618	28.754	24.144	33.193	24.674	16.374	28.003	43.722	17.271	34.632	29.762	37.4	20.724	27.542
20.135	28.252	29.819	31.751	34.694	15.291	32.862	25.361	14.135	23.929	23.636	27.572	16.242	27.542
26.56	18.145	23.877	31.713	15.999	14.306	21.271	25.361	12.531	16.178	15.734	11.648	12.011	14.368
13.86	19.031	27.251	36.984	16.264	17.414	22.756	13.759	10.965	17.789	17.527	14.654	13.41	19.85
25.366	10.288	22.178	23.775	14.467	9.4088	16.387	10.853	7.6892	10.772	8.6524	10.352	9.1286	9.1321
24.707	20.589	28.686	34.416	16.524	16.763	19.975	19.781	15.351	26.611	18.808	20.708	13.402	24.138
26.193	12.81	21.98	13.108	16.524	8.0896	15.772	17.605	9.9392	13.644	14.208	13.832	8.5177	11.947
9.8544	16.017	21.733	28.668	15.416	13.942	16.147	22.8	12.223	15.104	15.638	16.536	9.7825	16.183
29.471	17.253	28.614	31.231	22.856	16.126	22.077	16.952	9.6696	15.841	18.218	16.536	10.98	17.045
14.887	23.766	30.075	38.296	22.95	21.641	29.81	27.661	19.136	18.72	19.229	19.017	11.98	19.527
18.019	21.088	35.434	38.296	23.23	19.124	30.739	18.766	14.606	20.321	11.682	15.091	8.5342	17.46
13.869	12.849	14.856	25.192	13.223	11.497	13.013	13.939	11.833	15.568	10.587	10.793	8.7653	11.332
17.168	12.849	11.951	22.999	10.287	11.497	11.427	19.574	15.512	12.121	10.613	29.18	9.1562	13.324
12.931	14.186	13.466	18.586	12.105	8.7048	11.547	16.094	11.351	13.8	12.604	15.746	9.7401	13.467
12.931	18.728	17.943	27.81	14.713	17.407	21.225	20.256	14.47	20.935	14.893	16.625	10.571	19.261
11.089	29.539	45.586	33.259	28.934	25.331	32.186	25.772	20.689	30.378	26.564	21.389	18.019	26.343
15.094	14.566	27.539	14.963	14.221	13.328	18.824	14.012	10.628	12.306	12.652	11.242	10.137	12.934
22.093	13.993	22.272	20.613	13.099	12.564	18.712	16.802	13.362	13.332	13.091	13.989	8.859	13.11
27.843	20.235	25.136	29.512	18.354	16.675	18.712	24.635	16.672	19.848	20.116	19.228	15.712	21.148
16.128	20.873	16.623	23.627	18.244	20.211	19.761	29.226	15.19	20.439	21.078	19.378	14.903	30.487
18.822	22.215	17.143	28.021	17.49	18.408	19.761	17.393	17.945	20.562	18.681	19.152	14.491	25.309
17.248	34.01	33.936	47.245	24.505	25.578	35.74	34.996	27.536	27.945	24.136	24.095	20.108	37.839
11.087	53.777	89.751	50.107	52.372	46.448	69.062	35.973	31.119	49.825	37.734	38.053	25.557	45.763
20.479	36.948	68.312	38.446	33.702	33.733	51.852	31.168	19.81	30.778	27.721	23.335	20.523	29.996
51.554	56.713	64.147	72.6	51.85	68.217	70.544	60.825	33.291	44.33	31.275	42.237	24.554	42.422
45.714	69.376	95.092	103.57	65.548	68.217	75.853	70.371	33.291	64.217	49.03	52.405	34.869	56.478
23.027	89.147	112.9	102.62	79.086	89.776	97.957	62.157	51.006	78.587	71.669	64.756	54.742	69.217
36.408	72.422	98.041	71.779	58.479	65.957	88.66	58.658	38.596	64.189	61.397	71.887	45.064	56.752
27.853	92.87	86.761	90.309	76.119	80.601	92.695	69.735	53.449	80.264	72.463	67.34	56.362	74.536
35.555	92.083	95.997	92.552	91.337	80.932	102.83	79.727	51.418	82.211	74.261	79.134	56.532	77.773
48.993	93.922	107.55	91.641	99.226	82.797	85.946	65.193	46.472	88.665	86.076	84.153	64.465	88.8
37.255	91.542	101.67	95.413	69.889	78.68	77.888	65.269	54.818	95.213	95.731	99.531	68.472	81.953
37.394	69.271	81.612	75.823	53.488	66.452	77.888	59.539	55.036	65.414	77.459	44.482	55.261	63.623
41.116	64.501	69.302	70.524	45.432	74.888	61.812	83.342	75.592	60.576	73.299	47.828	74.671	56.342
171.55	135.86	150.91	144.96	156.78	137.38	142.69	146.56	153.43	123.22	120.09	130.74	124.29	124.32
118.57	207.02	221.09	239.28	204.81	180.24	230.23	198.9	202.92	173.83	190.38	177.72	209.05	172.54
118.97	86.885	155.89	126.94	117.75	105.4	147.05	111.26	108.76	54.739	51.185	54.43	84.566	47.477
71.805	66.458	97.167	70.094	78.164	77.057	70.991	82.545	101.69	76.559	96.758	76.965	96.807	71.148
94.734	119.3	132.69	149.89	116.47	143.08	147.56	120.31	112.22	98.611	97.372	92.659	112.12	90.959
67.066	105.39	132.62	114.18	126.02	85.853	127.19	115.73	120.38	114.68	103.28	117.23	84.73	114.91
80.652	203.01	182.21	167.68	205.05	170.06	204.41	197.28	134.87	199.17	200.3	203.09	169.78	179.42
106.38	120.22	94.825	99.215	104.67	77.647	107.4	106.79	127.18	137.2	139.89	162.14	102.01	126.52
91.506	92.554	85.254	92.457	104.67	84.354	100.41	84.813	112.51	105.52	139.89	112.74	102.01	107.57
85.997	83.7	119.19	113.41	117.7	97.87	128.42	97.159	105.73	71.622	87.206	83.512	90.235	74.993
67.441	51.918	64.972	71.307	61.814	69.325	66.434	69.181	77.903	50.481	53.857	47.821	59.877	48.379
94.593	92.956	74.485	76.382	78.74	72.313	66.434	90.878	88.8	106.11	106.08	84.721	97.979	86.309
52.898	132.81	116.78	121.87	106.17	132.88	124.05	111.3	93.93	133.27	112.36	123.25	104.75	130.9
75.052	92.072	89.191	86.02	82.805	65.869	84.601	64.161	78.039	101.57	90.087	110.07	76.025	109.34
71.347	70.468	77.264	67.598	72.875	72.81	82.162	69.687	78.039	65.074	83.734	65.496	104.62	59.532
79.833	80.147	117.8	89.291	74.375	73.118	101.55	87.319	92.698	85.474	97.103	79.728	101.17	87.846
166.49	105.28	168.11	129.3	110.34	120.9	156.6	101.05	71.476	77.467	73.438	86.282	77.13	87.935
68.305	67.697	74.844	73.746	65.639	78.801	72.313	82.609	94.352	61.826	56.99	76.394	93.65	76.415
96.742	96.73	109.64	138.31	123.13	111.38	138.6	105.63	75.532	102	111.75	85.768	101.72	109.93
91.3	82.83	81.351	101.21	92.771	68.238	83.736	86.303	74.774	84.315	118.86	121.88	87.569	102.26
114.61	106.46	114.21	108.53	102.37	121.78	110.7	156.4	150.9	100.68	87.136	112.41	116.59	104.79
113.52	129.15	131.48	174.11	100.43	157.08	149.9	131.27	123.91	140.72	139.09	121.11	133.92	131.87
124.57	133.8	137.09	153.44	129.7	147.06	135.33	148.24	154.72	107.64	138.21	107.26	140.3	104.02
83.714	124.27	102.38	116.94	126.98	120.22	118.75	125.43	150.04	121.18	144.01	115.78	128	130.42
78.294	119.12	107.81	122.53	103.28	123	118.75	157.73	163.99	109.9	96.833	84.846	120.44	96.616
164.25	115.61	150.99	117.42	122.71	104.68	148.75	104.44	112.87	115.85	107.16	131.43	99.064	122.19
140.61	96.179	109.41	115.65	80.906	100.13	99.957	97.165	112.62	90.869	98.097	83.241	98.53	88.603
86.534	72.348	87.144	83.905	80.906	52.928	99.664	71.39	92.547	67.141	83.138	69.866	90.21	74.489
55.59	116.74	94.816	93.957	95.821	110.56	78.111	150.13	164.23	97.451	126.61	101.77	150.42	94.63
62.571	102.57	97.644	93.957	97.443	89.918	107.37	89.264	92.391	98.463	111.79	101.36	90.916	94.63
54.433	128.34	93.839	155.11	103.41	108.46	124.27	141.8	158.91	114.43	155.37	149.85	142.99	103.96
130.45	128.34	120.78	131.92	120.86	116.75	143.41	114.69	115.32	113.09	155.37	153.18	155.22	103.51
130.34	118.09	120.74	132.35	131.88	99.451	121.25	95.739	113.24	101.47	129.09	118.61	115.01	105.75
95.268	82.643	84.348	81.008	80.862	65.38	80.448	103.03	106.64	102.43	106.45	90.073	122.93	92.218
97.891	97.809	129.66	116.35	132.83	94.553	134.76	118.92	116.44	105.55	134.46	104.03	126.03	108.12
131.28	94.613	119.77	116.35	138.32	102.97	128.47	101.32	108.49	86.65	101.7	81.909	128.93	96.332
127.5	98.396	106.04	96.214	107.51	102.97	102.68	113.22	107.07	95.458	105.31	103.79	102.72	87.928
127.5	106.31	165.21	123.96	115.7	91.26	153.21	106.92	91.096	91.971	78.815	89.012	83.989	89.423
118.63	69.734	81.597	87.346	73.089	82.791	74.069	90.82	103.59	62.147	69.042	55.248	91.934	58.609
118.63	129.64	96.991	124.9	111.26	116.69	119.31	88.573	84.321	150.38	130.6	156.47	96.098	162.8
79.633	160.52	86.276	134.03	97.272	109.63	90.241	102.63	91.203	218.44	213.23	220.48	180.16	215.21
182.61	154.25	143.08	136.37	143.58	138.88	135.14	150.12	157.5	163.1	206.6	175.79	165.99	152.55
174.14	81.742	143.08	79.367	99.346	84.028	126.63	87.105	122.87	91.293	80.201	80.264	121.32	87.732
149.72	117.59	189.22	144.35	162.68	128.61	182.53	105.23	133.46	113.78	93.501	119.53	115.77	101.39
87.583	103.99	156.35	108.83	115.23	99.124	136.2	97.698	120.49	111.56	93.501	88.379	102.8	99.569
152.95	145.65	169.07	178.66	126.1	173.73	158.26	138.42	120.49	148.3	163.61	148.22	162.12	162.6
147.45	126.07	226.13	107.62	150.3	108.23	165.52	124.29	132.43	127.98	189.63	122.79	184.09	133.01
152.29	125.42	242.93	124.69	179.62	115.11	200.81	111.78	127.92	105.69	135.69	114.87	146.12	108.45
89.508	134.95	92.231	122.54	86.533	115.11	109.51	103.64	114.47	150.42	171.06	166.47	152.5	165.46
132.25	141.23	168.68	148.7	131.07	152.77	173	121.81	126.4	148.75	150.81	121.1	140.7	137.93
108.18	100.14	86.096	104.91	66.28	108.83	98.38	124.03	151.35	109.6	122.82	106.88	138.11	101.88
47.243	95.814	48.229	102.3	53.513	107.25	56.088	107.72	117.22	96.464	112.42	97.978	132.01	93.52
63.896	86.649	93.22	102.3	81.157	107.25	96.206	98.054	98.041	75.75	94.062	80.945	82.082	87.822
85.748	60.247	82.682	72.861	64.256	60.065	78.301	51.4	81.378	63.484	75.862	79.459	78.857	74.939
85.748	101.51	84.693	106.92	76.395	100.01	89.987	122.72	113.11	95.205	83.139	89.523	90.704	95.559
96.197	120.41	94.543	110.56	114.41	106.64	105.09	122.96	129.18	128.79	143.15	142.04	133.54	144.56
212.85	255.07	252.15	234.02	225.85	254.06	247.86	253.4	289.96	251.42	289.79	241.87	289.02	253.81
205.12	249.18	252.15	236.3	213.29	209.02	218.28	212.14	232.38	223.27	247.61	213.42	254.28	230.42
140.17	120.29	161.88	125.5	142.53	110.03	167.08	107.33	124.8	116.68	95.418	130	100.12	125.3
179.44	139.1	216.82	127.35	136.77	117.31	179.31	111.82	109.33	132.85	139.7	151.7	146.05	155.43
84.83	130.09	169.79	127.35	146.38	117.31	154.1	106.92	109.33	90.986	78.971	108.16	67.881	120.73
66.135	341.11	526.02	267.57	357	314.46	443.24	226.15	179.17	313.87	258.8	248.66	209.27	294.74
44.957	74.199	46.267	77.478	43.822	89.188	42.936	108.88	111.77	58.854	62.041	57.478	95.722	68.492
26.836	39.596	57.615	60.439	43.822	36.662	42.936	25.161	17.167	35.984	32.651	56.24	29.851	43.972
57.983	180.36	237.58	213.16	206.09	145.22	197.16	119.08	99.178	149.15	125.99	112.72	95.2	131.57
46.33	374.81	578.78	354.59	366.17	268.24	392.16	293.77	215.94	313.39	266.1	218.21	216.52	280.1
44.855	80.758	109.77	68.148	89.935	50.804	74.468	64.653	76.351	63.262	64.966	47.217	86.692	69.003
42.898	64.189	67.747	78.715	70.444	48.113	64.408	64.071	59.409	47.95	43.195	81.466	32.978	48.697
23.848	53.987	52.521	73.48	43.643	33.496	46.113	92.701	42.169	43.908	37.532	43.962	41.643	38.337
27.437	46.627	49.708	49.844	47.242	40.194	45.225	58.532	24.396	51.434	38.228	39.848	30.431	48.094
23.012	35.219	38.142	36.752	36.567	31.625	33.578	43.632	21.348	33.779	29.393	34.873	21.866	35.253
46.186	79.165	76.913	87.758	76.409	64.313	78.34	63.759	39.346	79.28	64.162	80.518	46.459	78.815
36.117	44.767	50.99	37.787	43.627	39.032	46.716	29.676	21.846	53.765	39.374	40.327	21.657	42.145
41.202	63.626	59.664	65.857	65.347	41.076	55.109	61.02	33.191	70.673	45.258	45.66	48.194	49.091
35.059	49.466	53.497	42.244	54.73	41.076	55.109	32.123	24.354	49.596	37.153	52.726	28.179	49.091
30.937	45.698	52.169	71.891	47.165	37.942	56.918	50.136	35.955	45.502	37.422	37.297	40.158	45.168
19.597	42.654	45.878	41.118	47.165	34.456	46.205	45.846	18.8	40.621	32.951	33.602	18.792	37.04
39.597	42.831	50.111	71.509	54.617	40.752	52.319	45.846	24.211	42.425	37.873	38.46	24.921	37.502
44.005	77.539	65.631	74.313	69.548	60.807	66.708	60.498	45.603	88.427	63.452	82.439	46.763	87.473
44.005	97.384	70.835	91.436	80.407	73.523	68.915	65.046	45.39	117.4	95.596	98.297	62.725	107.81
54.147	83.293	88.69	83.215	87.531	68.64	81.394	54.272	36.027	74.307	65.03	87.609	45.915	80.128
47.525	43.908	52.783	41.033	65.259	37.901	46.501	30.315	26.708	41.429	30.148	38.87	28.552	36.786
24.086	32.018	43.243	33.017	36.894	26.532	37.919	25.54	17.327	34.661	22.355	26.962	19.723	29.799
56.459	57.653	77.009	69.802	67.168	58.534	72.576	57.091	35.899	53.246	62.494	78.303	39.329	60.489
44.426	103.21	156.74	119.48	100.95	58.232	79.715	152.49	64.559	81.93	94.629	79.798	73.472	69.138
21.261	72.688	104.15	76.687	71.327	59.115	108.69	75.096	51.437	91.813	74.567	60.072	57.756	50.021
46.51	70.092	80.924	73.613	66.396	51.576	108.69	67.021	42.269	57.341	50.999	49.627	43.535	48.628
38.99	176.15	224.03	149.09	171.48	139.47	196.09	136.81	88.498	184.01	137.29	141.96	92.105	154.01
37.101	129.49	204.5	131.39	119.87	97.831	150.38	82.765	62.106	128.15	92.43	83.465	68.335	99.098
47.143	80.951	114.58	85.961	87.574	52.712	70.8	82.765	59.863	65.575	53.074	44.08	54.44	44.952
33.322	67.664	99.954	68.778	76.412	37.676	55.033	66.754	46.462	53.725	39.62	41.468	52.635	40.626
68.792	114.88	119.6	109.02	119.34	91.093	128.53	144.77	65.583	87.871	91.312	95.239	96.025	86.782
61.305	109.75	119.6	94.929	119.34	83.331	127.82	101.85	65.875	93.604	91.312	92.649	74.485	94.579
56.909	75.923	89.89	66.758	88.526	55.478	73.732	62.051	40.945	76.994	77.223	75.61	82.421	77.582
74.069	80.79	95.17	85.803	81.284	69.98	74.348	61.435	41.514	78.165	60.675	114.13	51.793	81.443
53.081	51.776	54.3	78.957	57.836	44.46	54.184	47.528	33.66	68.344	54.663	115.33	29.459	58.563
83.87	69.584	75.66	85.483	68.795	60.425	65.921	68.319	47.238	65.252	59.63	52.431	72.216	59.477
62.949	69.584	84.777	85.108	82.538	64.024	73.038	86.786	56.371	66.113	59.63	65.832	52.253	66.09
32.437	38.565	58.675	61.836	37.393	30.584	52.273	57.214	26.091	43.406	26.345	25.165	28.565	22.619
42.607	52.02	92.407	55.465	54.201	42.781	99.426	57.214	32.891	41.529	38.716	44.113	29.256	40.065
152.91	66.832	114.89	97.239	79.769	47.948	71.57	74.073	38.882	60.138	52.91	57.744	49.746	49.636
56.009	78.6	114.89	63.585	85.608	53.976	81.11	90.675	41.675	63.095	69.571	65.329	55.473	70.317
55.005	72.678	75.196	79.82	77.375	62.203	75.473	73.568	38.137	73.91	58.148	68.487	39.376	70.317
82.317	79.599	116.12	107.2	106.59	80.458	89.553	76.343	44.178	71.862	68.475	68.789	53.607	68.686
43.325	61.159	64.034	84.637	63.489	45.062	50.114	76.343	30.448	59.185	43.773	47.756	41.024	55.341
77.317	78.015	102.24	65.038	91.994	55.008	70.391	61.107	43.002	84.203	61.491	60.501	45.861	72.282
85.638	88.542	118.95	77.978	105.97	77.686	90.083	122.03	59.468	88.65	70.478	73.238	46.329	84.848
46.357	74.411	56.547	66.772	67.846	57.435	55.716	45.974	35.234	67.256	62.011	56.07	51.542	67.378
32.942	87.075	59.107	103.97	76.314	95.533	67.585	99.35	76.901	86.864	75.897	68.704	62.719	72.331
56.58	62.354	46.857	76.058	58.724	78.875	62.903	68.415	44.679	55.048	55.133	65.509	51.946	67.99
108.75	202.69	203.48	214.02	193.65	202.76	216.35	167.21	124.52	168.5	150.25	191.61	118.78	189.31
112.07	149.9	166.61	134.56	160.63	149.74	162.68	115.07	108.25	132.75	115.72	129.23	106.27	139.4
68.043	113.42	113.25	121.23	118.02	93.927	106.67	84.265	83.554	110.11	115.72	135.98	96.451	103.1
61.124	95.606	89.714	102.87	80.152	93.927	84.646	108.75	94.029	82.454	86.57	74.042	75.307	80.067
55.01	134.02	144.9	158.12	116.4	120.82	148.52	110.91	84.635	119.99	102.76	92.183	79.863	108.84
51.308	115.33	149.73	134.74	112.42	101.43	138.86	84.174	78.741	114.78	89.417	101.02	67.9	108.84
60.361	114	112.24	114.85	93.6	94.283	114.78	71.681	68.315	114.78	101.29	110.5	69.629	117.79
29.68	50.104	39.027	54.764	39.742	57.459	38.992	53.165	62.567	46.888	55.444	62.777	44.694	40.549
62.678	89.608	75.241	102.46	75.886	103.28	81.488	83.557	67.87	98.659	96.467	102.69	70.254	103.87
97.57	154.08	163.12	165.77	167.21	145.46	164.5	109.21	94.924	147.54	128.26	147.49	94.733	155.29
64.122	106.6	168.93	103.9	98.477	102.68	133.71	99.518	95.908	105.23	76.803	84.71	72.506	94.753
56.182	86.844	96.891	129.24	63.462	86.268	81.642	96.403	90.071	71.793	76.459	57.253	74.682	72.276
42.305	59.671	56.358	73.797	45.769	71.678	58.287	79.245	86.629	63.117	70.139	57.253	66.855	66.388
96.277	108.6	72.743	112.92	95.959	114.95	95.615	94.722	105.5	116.47	117.73	152.92	115.14	120.92
74.146	97.048	108.94	107.62	114.91	102.01	116.46	100.2	74.357	88.96	66.009	94.885	56.408	95.248
51.212	86.853	80.908	83.397	88.186	86.337	76.345	69.102	59.531	77.271	74.07	66.984	59.103	71.121
62.462	86.853	75.916	90.01	75.113	91.502	77.545	92.085	79.38	77.772	74.07	78.82	64.012	73.925
62.462	56.118	61.331	65.727	67.197	60.01	70.914	39.723	35.025	62.828	47.309	65.337	33.933	64.695
43.671	72.057	106.66	110.12	68.08	90.592	102.8	75.349	44.99	68.279	55.227	63.243	45.413	71.305
59.441	179.76	200.08	211.93	155.74	200.46	221.15	157.14	139.2	137.79	127.21	110.96	103.94	127.77
102.66	79.475	104.98	89.979	83.975	77.681	91.597	89.966	83.391	78.902	91.448	130	71.642	70.614
89.804	83.147	102.24	95.4	83.975	81.371	91.597	81.357	67.863	88.521	91.448	88.556	71.642	81.282
94.809	92.954	142.65	114.39	135.31	109.07	132.81	97.788	89.438	87.48	74.588	88.556	68.037	81.282
86.68	122.26	92.179	93.455	103.58	88.088	101.47	144.96	111.62	149.18	176.84	170.02	152.32	164.69
58.171	109.43	92.179	112.54	74.374	88.434	89.964	104.94	145.28	88.708	119.31	98.459	146.93	84.722
74.124	95.714	92.653	99.335	73.218	110.55	80.223	102.63	119.27	79.96	82.208	63.076	88.427	75.383
101.99	104.15	143.39	118.98	109.28	110.55	127.09	107.97	138.51	97.386	97.405	90.79	116.42	87.989
77.5	118.54	57.635	118.98	73.761	106.19	79.289	135.12	135.06	101.42	117.85	90.79	148.61	89.304
84.589	71.265	85.888	80.141	91.59	69.192	82.316	93.264	81.324	71.272	69.9	53.564	83.133	64.854
84.589	78.3	81.124	98.372	91.59	93.174	82.316	83.128	82.518	63.895	67.078	68.992	66.351	63.279
111.03	78.3	96.428	100.02	126.1	95.518	100.71	82.755	78.382	59.371	72.949	73.061	73.885	67.833
181.85	112.64	204.76	113.72	155.51	118.25	205.77	82.755	78.382	105.69	90.148	95.729	84.026	106.55
113.19	153.06	105.8	134.41	121.07	143.37	143.04	111.75	112.95	156.22	144.82	128.52	120.77	157.06
76.391	58.043	59.155	74.7	53.618	70.7	57.632	64.413	83.953	55.771	46.584	51.377	48.859	58.86
76.293	51.546	53.962	64.282	47.825	60.183	49.805	64.413	97.715	74.294	76.234	55.174	98.849	62.345
73.798	104.96	120.23	130.03	96.138	133.19	125.47	132.14	124.5	106.46	101.98	79.393	105.76	100.13
133.56	100.23	172.95	127.04	130.13	121.31	166.39	105.64	124.5	125.03	125.73	116.2	168.52	111.64
125.42	163.88	242.03	182.09	164.42	118.42	193.2	130.15	146.63	152.55	154.4	81.23	150.86	116.52
72.913	87.176	83.994	93.766	98.974	81.87	122.97	154.77	134.27	110.23	100.2	68.318	103.9	70.716
95.248	71.936	114.41	103.67	90.999	93.31	116.48	88.864	70.234	62.539	61.118	60.872	82.684	64.683
85.758	72.155	110.06	71.379	107.07	75.887	103.76	82.642	90.31	65.742	58.988	68.667	82.231	59.653
81.337	96.086	84.85	121.86	108.55	131.63	107.62	130.71	100.99	87.659	71.942	86.149	61.406	81.007
102.41	117.53	157.22	116.94	139.53	109.87	161.44	96.853	100.99	84.442	82.156	99.57	90.484	98.454
99.974	119.4	183.25	112.77	139.11	99.546	160.26	91.11	73.373	118.56	79.658	102.24	62.272	112.43
100.92	118.21	146.73	104.19	117.34	93.366	122.44	102.77	73.373	108.81	81.152	102.24	76.032	106.67
45.65	57.016	82.783	62.456	67.812	44.261	79.918	67.409	55.817	59.785	49.603	62.643	42.151	52.976
62.245	86.295	121.49	82.864	84.29	65.722	81.675	97.248	51.923	80.784	70.519	122.99	49.001	69.97
44.942	88.614	103.03	94.016	88.999	69.586	95.442	77.976	48.426	78.006	73.195	99.19	65.276	86.651
44.942	73.037	69.615	84.293	64.837	56.229	63.533	56.653	48.426	66.987	70.863	76.255	65.276	61.158
40.127	54.366	81.527	83.38	54.56	57.74	73.463	48.911	72.743	50.782	53.572	74.059	67.919	45.636
83.04	83.334	119.5	111.64	84.59	80.115	105.65	105.29	58.453	103.19	78.401	70.376	71.283	92.32
83.438	102.32	103.04	133.15	84.59	95.902	105.65	105.29	67.908	103.32	108.23	83.844	90.938	99.537
36.574	45.93	87.708	73.337	62.958	52.145	73.728	48.395	66.333	37.015	46.896	37.987	53.809	32.747
77.701	92.95	132.83	96.032	82.968	76.803	111.97	88.925	80.411	79.7	61.136	63.08	76.538	78.084
87.079	102.03	174.73	143.93	121.2	125.3	169.01	105.81	95.74	130.46	79.445	97.237	64.942	101.39
136.7	188.48	234.1	156.1	163.75	161.63	204.87	180.5	151.73	168.41	164.61	152.64	178.43	158.38
95.692	97.284	130.35	88.941	127.74	85.961	123.14	79.12	76.03	88.186	92.496	90.966	95.375	93.769
102.03	82.719	99.59	88.941	93.692	99.777	105.61	96.223	87.517	73.118	74.987	71.32	82.065	71.602
67.943	111.11	198.36	108.4	143.1	106.48	174.55	86.281	88.961	91.454	108.43	90.765	92.451	85.032
107.63	111.11	244.93	108.4	163.21	113.32	182.3	102.36	82.946	108.95	104.91	93.496	83.694	103.35
159.1	146.9	232.64	145.98	146.14	153.68	182.3	148.55	185	140.01	170.48	113.58	180.29	124.09
155.74	146.9	194.84	149.25	146.14	153.68	157.84	121.97	127.62	172.96	189.95	188.22	180.47	168.37
105.89	138.11	107.12	134.58	137.03	127.46	151.12	120.74	95.798	144.38	133.23	144.36	120.16	150.25
55.258	84.989	102.39	131.35	108.13	94.289	114.2	98.914	87.071	73.602	66.406	80.45	91.649	84.242
91.524	91.783	90.496	101.03	66.093	115.85	92.87	114.09	126.66	77.537	83.449	90.916	101.44	60.771
104.12	102.73	132.59	91.483	91.943	91.741	90.517	114.09	125.46	109.89	102.19	85.924	122.11	92.994
106.49	91.296	129.51	77.595	101.81	71.686	101.46	57.795	48.757	81.767	75.919	69.765	60.331	81.108
79.677	175.25	217.06	145.64	174.46	144.19	190.13	116.66	98.459	148.82	138.1	123.34	105.47	139.5
66.443	184.93	262.42	180.99	188.99	157.32	215.01	139.13	102.13	162.8	138.1	133.36	104.12	156.88
54.914	192.81	248.45	182.08	183.38	151.69	213.91	129.91	98.973	162.52	141.47	133.36	103.34	156.88
48.939	98.817	124.77	99.492	108.46	84.148	111.68	105.53	46.488	92.523	69.826	97.109	47.49	87.023
75.425	123.88	152.89	116.84	130.52	108.78	138.18	102.04	60.09	114.61	84.002	96.68	64.403	102.36
44.111	66.611	104.52	63.076	77.128	65.571	84.87	44.247	39.145	54.575	45.227	108.55	33.445	57.821
49.848	26.576	41.829	38.413	27.462	27.852	36.37	29.112	14.149	32.84	33.03	34.662	16.467	25.25
35.03	70.809	105.02	64.043	69.467	52.828	61.289	61.453	43.364	71.142	79.327	55.743	46.875	61.381
57.125	85.346	139.76	96.296	99	72.226	96.279	105.39	58.189	75.693	72.619	74.482	59.543	77.07
46.104	81.946	115.56	65.024	84.994	60.1	84.625	88.17	41.654	91.298	58.468	68.175	46.878	71.728
46.104	65.018	79.943	69.495	66.945	46.123	82.487	77.785	44.542	51.779	68.432	60.428	51.585	51.063
34.346	66.362	79.42	53.036	59.307	55.78	56.252	52.07	43.601	59.814	58.063	54.981	42.572	56.001
50.001	74.904	66.013	68.862	69.211	63.339	67.532	62.236	43.601	64.172	60.272	59.118	40.87	72.332
38.495	61.385	57.844	62.641	64.151	58.27	55.026	53.462	36.751	60.27	51.061	46.268	31.918	62.307
35.57	45.938	62.86	50.948	58.408	47.803	58.398	66.746	26.699	46.152	56.993	72.625	25.822	41.95
36.127	48.733	56.42	50.948	55.884	48.228	51.183	44.113	23.59	57.575	37.018	39.196	24.826	44.497
55.072	66.027	84.469	63.426	70.816	62.261	80.189	56.04	32.689	54.728	54.667	123.38	29.853	62.305
35.019	41.093	64.751	62.21	53.522	42.854	49.814	41.96	23.061	35.302	32.444	45.554	23.997	35.746
73.181	56.828	92.08	50.663	68.051	46.603	75.951	68.8	27.461	43.051	36.887	61.51	28.726	49.034
47.91	45.499	54.584	62.419	57.316	41.705	54.707	39.506	31.113	49.324	35.116	53.355	29.707	44.183
207.74	70.966	115.77	91.593	70.124	56.852	91.76	71.545	38.486	63.692	49.767	59.564	45.002	49.785
102.3	81.918	89.459	108.98	82.938	59.839	98.32	62.839	38.158	59.336	59.578	90.076	45.371	66.808
164.91	81.918	105.4	76.917	82.938	59.839	106.08	62.667	38.158	56.618	59.578	72.856	45.371	51.457
28.295	60.497	73.468	87.232	57.687	50.406	65.455	51.21	35.9	49.329	47.571	46.113	36.09	48.71
12.659	67.317	89.321	99.889	71.352	32.673	60.691	119.96	47.366	54.055	46.808	43.613	44.332	53.744
45.961	74.745	89.321	106.32	76.571	60.958	78.564	78.228	49.594	66.815	68.357	64.177	44.795	61.838
36.196	53.745	51.634	74.341	52.058	45.584	50.905	38.213	28.86	50.13	50.586	49.014	34.725	52.936
36.935	54.364	36.619	52.68	42.267	56.467	41.875	43.831	28.568	44.417	43.853	49.014	43.042	44.629
40.992	54.364	56.173	80.178	67.466	56.002	55.572	60.416	50.861	49.041	40.478	47.612	42.81	53.497
59.589	74.17	80.959	92.277	74.563	70.628	70.968	87.327	59.703	78.485	74.168	94.715	57.657	83.279
96.233	64.609	93.277	67.98	94.031	60.394	94.795	73.478	66.474	78.485	63.095	94.132	38.786	77.979
65.74	95.002	99.204	85.673	107.55	95.967	109.82	73.478	66.474	93.47	79.505	118.41	62.227	102.01
50.311	93.042	71.531	100.6	72.141	105.05	70.847	106.84	108.14	91.856	101.1	78.486	93.887	84.525
77.266	93.042	92.732	88.349	93.748	91.939	92.811	77.968	67.957	91.856	101.1	73.743	77.384	84.583
73.024	60.556	76.432	79.589	91.491	61.185	73.718	58.483	56.808	68.233	78.518	73.183	58.745	67.672
59.576	118.67	70.414	129.27	101.27	117.35	92.223	99.908	91.113	131.61	117.93	139.42	111.12	140.88
82.904	118.67	82.871	107.75	84.748	94.206	83.916	99.908	91.278	132	120.83	113.96	111.12	110.55
68.61	79.43	57.912	87.837	64.566	80.656	62.691	85.969	82.215	74.718	74.575	59.766	67.975	72.96
52.959	112.31	78.977	131.34	79.554	126.65	101.75	129.56	107.79	94.362	100.74	70.194	89.19	84.406
91.469	98.622	101.21	127.71	82.044	106.03	112.06	116.51	96.214	88.369	81.632	85.684	76.461	88.263
100.05	105.51	106.97	158.15	132.5	111.18	115.8	120.35	134.22	93.675	96.943	144.92	92.7	110.23
136.32	198.73	122.54	199.78	134.19	200.06	149.93	201.03	177.43	142.82	143.25	123.74	152.02	135.89
53.995	150.17	104.1	144.62	113.11	133.42	99.483	163.76	155.81	162.9	158.76	113.62	183.54	154.79
66.675	112.24	102.93	102.48	113.11	107.36	99.483	82.965	87.018	109.22	85.288	96.596	74.972	112.49
43.857	93.875	59.108	75.444	68.386	83.817	67.018	80.363	67.283	109.82	106.49	110.77	73.206	113.35
60.178	50.766	67.74	68.653	46.471	72.899	64.644	65.791	60.172	53.55	34.58	57.252	40.101	55.27
112.73	56.493	100.05	61.68	78.904	62.254	90.913	90.955	87.037	59.48	46.372	57.252	62.734	60.099
73.804	69.693	95.811	77.6	77.051	71.978	85.817	90.955	88.292	61.046	82.785	45.102	74.711	52.797
59.99	72.515	51.19	90.406	53.223	81.777	68.27	91.635	85.564	77.505	72.48	54.889	76.08	70.712
84.997	116	80.566	115.32	94.869	99.993	98.517	112.54	99.238	91.851	102.49	74.432	96.994	89.393
115.87	148.33	127.18	162.95	116.12	171.29	132.12	179.24	192.26	144.23	176.93	133.44	205.66	137.67
86.967	65.036	80.775	93.207	83.552	100.38	79.107	102.99	98.245	63.511	80.667	62.307	85.97	67.037
84.058	119.22	95.844	123.37	128.58	112.07	102.23	95.338	95.808	135.12	108.8	145.25	94.662	131.24
54.399	93.609	83.176	87.529	84.829	94.64	79.176	95.338	91.343	77.249	66.812	69.739	66.614	77.962
49.666	89.45	54.083	89.004	75.013	81.593	63.706	101.73	114.84	103.76	109.63	96.973	110.59	100.89
98.15	103.61	107.16	95.7	96.85	91.363	104.41	121.15	148.2	106.78	118.46	94.455	125.98	100.89
118.52	87.457	123.8	94.431	110.89	89.016	116.28	96.713	110.24	103.76	96.993	71.435	115.16	79.07
59.651	74.463	138.1	94.431	110.89	89.016	126.93	68.306	57.952	43.661	39.47	71.435	53.056	58.602
91.726	106.47	154.97	123.15	144.99	125.68	166.11	114.68	113.94	86.231	83.167	106.02	72.951	90.327
77.753	97.339	104.69	105.28	94.399	121.84	101.28	119.04	92.004	111.52	94.876	129.34	105.87	113.6
94.779	117.67	104.69	114.65	105.92	103.89	101.28	110.8	94.785	115	113.41	134.01	107.62	113.91
134.41	117.68	116.17	114.65	125.13	119.9	123.74	126.96	150.29	134.44	130.94	121.94	134.45	139.07
98.669	57.431	73.262	62.237	74.235	53.034	74.046	99.313	92.128	54.273	69.979	45.412	92.905	56.241
98.081	71.485	94.883	97.768	95.805	70.862	84.96	91.303	97.155	68.85	84.896	47.017	100.48	57.028
158.89	77.41	138.4	109.08	101.4	100.8	141.82	76.234	77.008	83.819	84.268	91.767	70.273	84.727
126.14	118.04	155.45	132.17	145.76	96.83	131.06	87.808	79.081	110.34	127.66	112.83	94.343	113.9
88.024	65.272	97.759	93.625	88.444	76.417	90.119	90.609	70.183	79.211	64.286	84.248	61.389	80.327
187.25	135.34	165.82	156.15	142.08	129.78	140.91	119.75	90.903	139.9	151.86	143.47	136.89	123.82
126.39	76.048	115.08	83.337	105.9	92.658	90.495	98.7	103.58	83.824	72.35	75.545	82.026	76.964
112.35	107.6	103.15	121.96	92.672	130.48	115.14	102.49	114.51	89.483	99.492	75.545	118.1	89.434
77.993	113.54	71.988	117.72	72.801	128.47	83.438	114.25	114.51	104.74	99.492	99.425	140.68	99.655
77.993	50.759	71.988	62.191	64.487	47.606	55.012	70.824	64.454	57.609	65.881	55.038	72.206	59.407
82.416	52.606	89.632	60.517	76.888	48.226	80.773	63.507	62.758	54.064	67.192	58.924	59.698	54.372
75.074	66.088	54.01	80.319	64.816	84.249	63.109	66.71	62.758	61.287	53.503	71.897	81.164	68.721
62.521	79.382	60.727	92.811	67.186	83.278	69.199	97.82	88.456	86.601	89.297	73.313	91.488	67.73
104.95	53.346	82.831	71.332	95.236	59.248	99.732	65.727	68.851	49.719	36.844	77.616	52.542	54.886
101.5	86.417	128.27	127.96	161.51	143.17	174.09	93.861	83.661	74.949	61.057	102.69	71.742	86.222
88.765	86.417	108.9	96.283	105.15	104.17	110.08	84.124	83.661	69.662	105.47	76.995	88.524	88.508
88.765	60.749	80.685	80.895	98.653	83.628	100.03	67.795	79.116	53.235	49.277	76.236	58.093	57.245
87.212	63.757	69.3	66.263	68.017	67.661	61.13	70.351	82.976	74.043	79.876	69.823	85.581	60.645
109.46	112.41	124.26	118.14	111.88	114.83	117.24	150.16	106.04	104.96	112.01	109.43	125.78	110.94
72.439	84.062	76.481	82.107	84.069	76.727	93.864	67.265	63.836	99.998	84.195	100.73	76.978	109.08
72.058	113.89	101.59	102.67	105.07	100.77	99.606	83.759	81.708	106.89	90.526	88.45	68.541	110.47
67.103	103.51	127.74	111.78	104.09	107.45	95.726	152.33	89.295	111.28	92.972	98.153	95.313	74.202
67.103	103.52	125.37	96.094	119.22	89.557	101.21	76.579	59.924	103.1	83.732	97.908	59.465	105.42
48.033	99.488	104.77	100.56	104.32	85.216	96.579	64.026	53.426	94.541	81.021	75.735	57.277	91.886
36.853	79.009	85.596	101.46	77.611	65.643	87.253	92.882	45.219	65.409	57.836	56.149	42.675	64.346
40.874	73.709	83.221	83.66	91.308	66.817	75.768	78.936	50.934	68.009	56.819	63.303	44.839	72.015
28.123	36.068	25.309	40.166	31.903	35.331	29.25	39.488	19.853	44.687	34.39	33.335	30.58	37.302
27.384	33.528	24.153	43.772	31.903	30.258	26.797	39.488	21.215	40.687	34.675	30.717	35.318	32.811
25.445	35.615	24.153	36.992	39.819	30.258	27.323	32.015	32.477	42.003	40.761	54.92	36.099	48.711
74.913	75.396	55.008	90.919	83.109	63.96	76.292	53.198	59.578	78.309	80.287	114.28	42.282	111.48
111.6	102.31	96.732	109.12	119.36	102.26	108.44	88.881	97.218	112.3	104.34	77.565	84.811	96.717
117.99	91.247	91.717	90.871	93.166	97.538	98.227	93.91	119.13	90.528	111.71	91.128	111.1	91.372
92.893	84.049	77.484	79.289	76.464	91.924	87.297	89.772	101.5	68.942	86.706	91.128	79.01	77.606
52.877	104.96	77.484	100.25	83.028	112.57	90.63	127.24	101.97	95.384	96.731	100.71	92.513	100.2
43.871	88.056	76.866	80.53	77.209	91.615	84.931	99.573	79.083	84.551	74.229	69.484	53.341	85.823
92.153	95.259	154.96	102.57	79.943	103.52	119.97	117.44	127.64	63.641	86.413	73.147	109.82	67.183
67.35	60.831	97.777	65.468	69.158	71.534	72.204	73.923	71.6	57.794	68.109	62.849	74.09	64.123
99.808	148.74	111.96	122.8	109.96	121.7	110.43	158.7	162.39	123.1	140.31	140.21	153.48	146.43
96.522	79.648	83.437	86.595	70.254	76.889	76.155	80.45	94.06	91.394	100.74	67.521	95.82	78.029
66.972	77.524	87.41	79.914	70.254	76.889	76.155	103.09	78.35	78.149	96.13	49.637	95.82	71.566
97.272	90.686	167.62	97.762	133.54	78	144.78	99.041	91.81	75.501	96.13	66.061	93.246	67.776
82.918	113.82	167.62	128.42	133.54	88.969	148.55	99.191	85.593	131.21	139.96	148.4	118.66	136.17
81.434	106.13	94.488	118.18	68.647	134.85	78.014	111.54	107.76	109.65	126.33	166.77	121.34	125.52
81.377	88.397	79.09	102.24	78.155	91.995	74.648	121.38	108.42	84.19	76.675	86.189	137.21	84.605
[truncated: 41,201 more rows]
