# Supplementary material for: Global sleep homeostasis reflects temporally and spatially integrated local cortical neuronal activity
Source: eLife. 2020 Jul 2;9:e54148. doi: 10.7554/eLife.54148 (PMC7332296; doi:10.7554/eLife.54148)
Supplement: Figure 1—source data 1. [file elife-54148-fig1-data1.zip › Figure 1/Slow Wave Activity/Slow-Wave-Activity-Mouse-4.csv]

Frontal EEG	Mean LFP	LFP 1	LFP 2	LFP 3	LFP 4	LFP 5	LFP 6	LFP 7	LFP 8	LFP 9	LFP 10
96.506	71.447	85.411	92.443	89.712	72.819	75.694	61.775	70.43	62.669	132.23	79.239
116.54	74.062	85.411	107.49	101.74	72.819	71.425	81.972	61.633	91.613	118.97	71.989
142.51	81.304	72.676	83.004	100.56	89.983	77.387	99.945	128.14	97.081	78.829	63.506
98.136	77.651	74.062	76.085	73.768	93.548	70.002	76.511	71.109	69.304	85.792	48.099
96.602	120.99	136.2	124.92	133.74	138.26	75.374	133.83	114.99	86.904	69.416	55.591
133.64	125.84	141.06	132.3	111.89	130.38	94.306	131.07	105	109.01	89.071	75.69
166.66	78.721	83.771	79.766	79.047	87.635	81.642	105.53	78.994	87.739	77.44	50.734
105.31	147.13	116.35	112.06	111.98	109.98	118.88	161.31	135.03	149.91	116.58	78.378
84.908	114.45	112.83	93.271	86.607	103.92	112.82	131.52	92.75	114.94	112.04	77.059
81.353	121.45	138.52	93.527	97.615	123.5	108.34	129.77	97.349	85.877	153.74	87.147
56.82	121.45	148.37	91.307	95.917	123.5	118.53	151.69	119.48	89.495	154.41	93.309
39.915	56.751	54.086	37.374	37.906	51.701	83.566	58.172	62.596	83.443	42.974	59.256
39.904	56.751	38.474	34.382	31.56	33.102	81.731	53.559	55.73	83.443	33.437	59.888
37.61	32.469	21.248	14.066	16.639	22.935	41.958	24.88	39.892	41.308	19.037	34.147
24.779	22.4	25.757	25.788	25.348	22.935	21.108	19.412	15.747	12.767	27.607	27.726
27.917	13.921	13.256	19.532	16.159	15.486	14.879	12.158	9.28	20.265	12.514	14.994
20.838	19.273	12.625	19.532	17.352	10.909	20.639	11.028	55.614	32.654	10.39	17.208
28.099	111.7	133.62	98.769	100.38	120.89	111.45	127.6	91.833	53.617	166.02	69.827
18.264	57.576	68.024	51.294	48.671	59.033	50.597	66.708	45.842	32.042	73.943	46.361
30.693	89.52	107.51	79.897	81.816	102.72	91.084	92.774	75.246	51.232	125.53	58.823
36.328	92.333	121.25	73.673	80.524	104.27	98.661	99.111	83.138	56.531	125.32	75.715
34.414	73.321	51.817	37.467	40.737	56.767	79.326	78.77	62.586	60.856	58.631	45.676
24.237	17.204	18.876	19.213	17.386	16.81	12.329	20.405	18.332	19.902	11.113	11.395
42.326	18.029	21.12	16.29	15.746	22.488	17.422	17.806	21.111	13.086	26.473	14.351
27.067	26.365	23.217	27.481	26.762	28.801	31.739	23.584	20.026	25.982	42.71	21.483
26.205	45.934	55.135	44.701	45.87	54.242	51.745	51.663	36.195	23.439	50.897	32.143
23.742	14.683	16.337	17.91	21.567	14.145	25.383	11.03	10.007	14.984	16.597	16.481
24.374	14.683	13.186	16.944	16.868	11.432	18.5	9.3374	11.758	16.562	16.597	21.588
29.22	26.267	35.411	30.445	34.052	31.103	18.5	24.358	23.082	16.562	23.492	18.144
29.609	37.993	28.87	29.164	27.597	28.507	41.624	33.704	35.536	52.942	34.415	30.494
18.661	17.631	28.509	19.834	22.361	28.296	13.811	26.338	13.892	9.2836	37.444	13.737
21.872	15.908	17.924	17.494	16.959	21.509	17.606	14.224	16.295	11.297	23.427	16.26
22.806	30.795	29.299	32.529	33.708	43.959	43.983	13.383	16.295	29.36	54.443	21.667
53.644	79.131	57.456	52.573	53.984	50.15	94.482	74.09	72.281	89.931	65.955	55.6
65.569	54.475	54.387	54.297	60.565	42.594	49.544	50.326	47.072	53.241	62.852	50.773
47.027	71.473	40.098	47.993	43.761	35.081	90.686	54.985	119.7	136	57.122	61.285
75.122	114.43	104.1	105.75	104.87	96.739	107.22	88.472	181.33	129.39	104.18	73.712
63.565	115.44	106.58	96.232	91.446	96.163	109.75	100.52	92.622	121.65	105.09	62.146
95.405	120.73	116.68	96.408	91.446	96.944	125.49	130.44	128.62	131.25	110.22	84.36
131.71	124.05	123.11	130.79	131.11	140.32	128.29	108.34	90.6	93.995	139.03	75.825
126.86	81.277	107.2	111.46	114.16	95.119	92.869	88.352	70.106	85.441	93.975	58.448
91.359	121.95	100.25	85.971	91.14	101.13	121.69	126.16	113.03	130.19	119.06	80.791
71.235	110.56	92.904	85.971	91.14	98.563	117.11	113.51	116.24	122.75	104.74	74.453
71.235	88.858	104.94	108.66	92.398	98.563	76.039	82.537	72.744	75.386	68.302	42.886
105.27	121.04	112.12	98.016	97.779	106.49	131.01	131.45	123.4	134.14	148.83	88.476
113.2	103.36	124.64	149.51	165.63	114.15	87.924	90.235	75.035	94.58	118	56.695
71.685	83.029	95.147	103.09	104.23	94.672	78.587	64.306	60.935	83.357	53.39	53.235
127.93	64.621	62.122	65.167	57.719	65.082	66.738	71.847	78.313	83.357	71.159	55.342
96.766	68.855	79.913	58.984	58.263	63.617	70.254	104.56	93.839	48.349	79.452	55.741
80.886	56.927	55.094	56.684	52.5	57.192	55.487	73.612	80.411	61.931	79.452	46.139
152.19	163.61	180.76	187.4	180.48	160.57	148.65	167.3	147.16	162	190.82	101.19
151.68	146.98	180.76	153.43	164.01	158.19	120.7	150.61	201.53	86.097	125.03	86.334
117.42	102.83	117.43	112.83	110.81	96.784	112.63	111.33	103.07	119.37	96.873	76.448
96.556	113.18	115.75	138.68	133.45	110.01	108.29	99.383	137.38	150.96	145.13	70.18
136.95	128.12	145.23	172.42	195.33	126.39	151.42	120.51	137.38	136.67	159.15	100.8
194.85	214.22	199.21	144.53	159.15	189.52	174.5	185.43	187.46	163.8	172.28	114.99
138.34	112.37	126.3	120.39	118.97	109.48	89.292	108.08	87.332	89.648	93.194	65.644
92.759	82.517	73.645	71	80.314	76.427	81.353	84.805	67.568	76.035	88.778	54.922
60.278	70.766	80.648	86.403	83.287	88.623	78.927	57.883	49.64	64.158	81.811	62.851
65.667	114.49	118.63	127.2	129.49	134.35	137.75	147.22	133.7	179.24	120.76	89.147
184.23	202.2	191.75	158.37	152.79	176.57	172.83	182.79	168.48	212.43	180.4	116.57
153.31	135.93	107.67	125.75	123.59	97.772	130.43	129.56	144	168.89	97.81	103.7
153.31	105.09	121.1	137.31	142.64	97.772	96.489	104.4	93.475	84.841	109.23	61.927
80.531	67.096	68.671	65.481	66.569	64.484	58.448	74.379	53.94	46.343	71.632	47.811
45.085	29.494	31.875	57.573	38.006	31.945	24.621	24.677	22.52	24.458	25.065	22.758
36.968	32.615	34.751	30.933	35.67	34.331	26.732	23.025	21.857	20.074	44.205	24.175
48.634	24.814	24.752	32.63	24.467	22.811	24.518	21.252	32.607	14.239	30.811	13.521
31.956	30.987	30.004	27.884	34.786	35.701	31.953	27.966	86.816	20.783	28.436	17.941
66.067	153.71	116.13	97.08	92.831	138.49	186.72	103.94	213.8	199.54	153.56	119.21
47.711	80.396	72.589	81.402	65.211	60.485	91.308	56.758	71.133	100.68	75.97	64.904
81.636	66.568	73.82	60.842	56.03	78.228	74.739	95.859	63.744	55.571	72.917	56.17
102.75	109.75	78.369	104.29	114.24	84.607	112.72	88.18	179.58	132.3	137.58	74.919
129.36	61.162	51.195	72.489	75.877	123.25	65.473	47.492	54.649	84.017	68.716	36.03
63.094	72.244	55.665	64.659	53.924	74.263	87.132	63.093	61.844	101.89	54.577	56.843
102.01	85.364	68.785	67.068	64.978	57.341	107.23	92.921	82.068	134.33	85.83	80.151
102.01	154.42	155.15	174.84	177.97	139.69	133.55	144.05	152.59	146.91	171.44	83.054
93.038	98.145	114.86	105.14	128.34	120.2	92.981	94.503	90.068	103.67	92.989	58.402
143.22	80.654	108.01	99.925	109.75	96.235	78.548	85.886	78.547	62.692	101.64	45.884
145.49	199.98	161.83	190.83	185.77	170.45	192.98	198.9	209.45	266.85	177.7	133.78
93.367	113.27	84.444	117.87	116.95	85.477	112.88	91.13	133.25	177.65	91.857	97.567
129.35	127.34	112.7	122.84	129.79	108.12	129.68	129.33	133.25	145.59	127.68	118.4
112.42	164.29	141.68	161.11	179.23	121.26	141.65	171.12	151.76	227.09	158.63	118.4
81.197	134.53	93.046	67.053	62.903	105.31	138.13	162.72	207.35	165.39	103.84	99.637
152.11	189.18	168.89	189.33	194.32	148.69	173.9	207.34	190.49	243.01	171.55	119.34
143.11	131.73	115.42	92.751	96.503	99.273	158.22	156.17	144.74	155.72	119.99	113.35
173.27	131.73	115.42	162.03	155.67	99.273	160.68	146.19	137.32	155.72	130.69	132.17
145.93	106.35	136.27	122.63	119.28	120.5	93.977	110.54	120	105.97	112.7	84.116
77.114	66.255	88.303	104.09	111.37	83.265	59.306	65.261	54.512	76.572	83.657	45.911
152.16	195.26	189.89	201.08	204.38	172.77	167.9	170.67	165.66	135.06	156.78	114.83
160.71	129.13	117.89	72.892	75.405	101.18	120.78	170.67	166.3	118.32	155.38	114.83
137.18	125.24	117.55	94.497	78.898	107.6	134.62	135.96	141.3	121.18	132.15	102.94
167.51	165.95	161.62	171.76	194.21	151.06	149.82	113.28	129.43	171.86	141.44	84.867
142.29	227.45	220.93	226.22	216.16	197.2	196.57	214.09	194.97	224.22	208.68	120.66
148.19	213.57	222.8	230.75	230.95	188.38	204.69	200.57	182.02	205.11	171.45	133.87
155.65	237.43	224.34	257.91	256.2	178.82	239.25	183.01	194.33	261.83	204.75	129.36
188.07	168.79	161.69	125.72	130.03	148.33	177.36	231.39	166.22	190.92	184.3	122.09
104.81	65.702	88.393	104.32	114.96	71.267	60.5	80.182	63.959	73.186	72.935	44.464
102.14	64.325	58.783	51.732	48.171	49.93	54.916	82.859	60.913	67.12	74.814	52.975
124.89	91.461	87.628	78.445	72.656	78.109	95.797	116.27	100.55	133.24	98.072	90.692
122.8	224.64	187.67	195.62	169.9	163.46	198.73	179.75	180.94	284.72	187.52	111.6
203.77	204.28	178.36	196.54	201.59	159.25	196.62	175.94	172.48	267.98	148.8	117.88
105.07	119.27	103.81	118.04	130.86	147.69	123.93	148.33	118.18	119.62	152.61	78.059
164.13	98.794	97.015	111.99	127.32	118.49	94.421	104.71	104.72	115.58	111.51	83.305
81.825	83.295	65.739	73.569	69.679	61.543	93.248	88.272	89.642	91.445	115.93	83.305
99.803	134.41	102.63	83.027	69.963	92.047	149.75	144.23	153.12	164.13	124.43	93.468
129.8	229.95	207.02	242.13	219.22	199.96	218.04	231.58	223.63	259.84	217.7	137.81
191.08	267.78	249.78	247.94	260.33	221.29	223.53	255.98	241.04	281.37	211.94	162.81
156.29	164.3	172.82	192.69	191.41	153.68	125.95	120.82	116.13	162.67	120.61	90.29
62.694	39.571	47.496	51.987	43.887	164.03	26.182	32.255	130.8	39.813	22.509	23.768
22.061	12.82	12.629	20.037	15.585	21.473	9.1781	8.6868	16.868	18.78	8.1961	11.081
55.996	40.712	51.284	39.127	36.427	53.581	51.259	37.612	42.809	27.48	44.068	36.499
92.971	58.388	59.796	46.873	48.652	65.793	64.003	61.038	99.02	53.641	67.51	45.733
59.877	95.764	77.365	87.351	86.336	92.667	102.52	82.906	90.858	112.09	72.247	62.584
109.94	141.47	127.97	142.61	160.13	140.54	149.84	130.96	140.15	157.54	125.01	106.27
122.46	131.95	155.9	162.65	187.72	131.42	129.63	149.54	117.09	165.71	122.62	106.27
108.25	140.32	120.1	129.7	128.35	119.32	145.13	152.48	139.13	169.18	123.15	89.734
127.67	183.93	151.17	188.88	185.09	128.75	164.57	138.82	147.73	192.4	182.97	103.23
110.23	107.4	109.46	125.65	138.02	117.84	101.98	101.62	89.322	117.67	101.37	65.958
133.27	58.335	74.776	83.625	79.218	65.078	68.388	78.827	76.412	61.201	66.311	40.47
148.14	115.98	128.44	145.23	166.63	124.48	151.91	147.19	116.58	157.97	146.43	94.13
182.41	187.53	184.15	134.17	137.72	173.71	213.32	219.36	200.18	194.83	180.81	153.82
141.34	152.67	193.25	208.36	218.3	161.17	116.59	110.8	111.06	146.96	126.84	92.757
147.4	113.53	117.97	130.1	134.35	106.28	157.55	108.66	104.81	141.22	97.714	100.49
60.298	74.176	77.438	73.09	74.308	64.328	70.159	75.413	73.153	90.378	58.407	58.011
89.641	93.049	77.438	98.108	104.73	79.538	87.954	115.18	78.213	89.345	74.192	95.499
169.02	141.79	166.93	170.91	188.77	130.76	119.58	112.19	149.63	113.96	176.18	95.337
157.8	182.82	168.02	167.72	179.2	145.63	192.23	201.89	207.85	211.01	186.68	135.91
221.22	177.99	215.4	224.63	214.07	176.28	141.31	179.43	153.31	154.81	153.04	110.61
168.71	190.12	205.32	218.53	231.3	194.31	162.23	192.99	165.12	217.98	194.19	126.41
142.65	190.12	205.32	260.03	251.66	194.31	162.23	182.2	165.12	184.46	151.06	114.02
199.98	221.14	211.65	181.28	198.98	186.38	240.61	214.99	215.51	198.82	193.19	146.39
93.301	115.51	92.992	105.35	83.763	79.729	111.75	127.51	113.73	155.98	84.214	71.799
145.13	162.43	150.66	131.22	124.89	139.41	153.54	199.84	152.47	172.66	142.58	121.08
117.99	190.63	173.81	172.47	154.08	156.49	165.21	189.85	178.34	189.68	134.17	118.68
106.42	100.78	115.12	121.81	116.67	104.61	83.189	117.28	100.15	143.43	75.252	60.479
136.09	105.15	115.12	121.81	116.67	104.61	93.685	108.74	96.513	89.434	88.293	68.214
89.159	99.74	84.259	102.05	89.784	73.976	97.782	95.293	92.05	133.66	68.959	52.998
117.11	132.19	112.02	130.29	129.28	106.66	140.94	129.36	134.77	153.03	127.72	88.084
201.83	212.58	211.69	191.92	209.2	182.88	224.42	171.59	152.56	177.07	208.22	142.58
201.13	140.86	148.4	141.82	158.03	139.32	145.41	140.75	136.19	158.79	151.7	102.48
125.53	101.6	96.571	125.95	147.87	82.299	136.91	119.01	115.33	119.27	140.07	74.805
156.92	160.06	140.07	149.34	151.19	117.26	165.55	160.17	149.01	165.21	137.86	117.26
164.83	169.15	157.43	136.99	141.36	148.15	158.47	166.83	150.29	168.24	137.86	119.52
127.25	154.64	133.56	143.76	150.37	113.96	156.85	133.48	195.26	177.82	129.53	115.65
78.491	110.42	90.024	106.51	114.22	78.06	107.95	102.65	103.16	120.55	109.58	65.027
73.133	110.66	83.92	78.59	72.31	89.098	135.39	90.963	115.72	147.1	69.261	78.613
21.002	34.975	36.616	25.978	26.497	31.754	38.228	26.202	43.821	33.049	29.555	32.287
48.57	34.975	41.618	38.234	38.923	37.237	38.228	29.585	50.643	33.049	34.854	32.802
39.1	44.98	37.282	38.691	35.972	35.656	62.005	56.86	65.857	71.354	46.583	41.087
53.516	29.447	34.208	38.691	33.987	23.627	33.283	22.651	38.61	29.393	35.661	23.028
37.977	28.892	34.208	34.829	38.294	35.101	30.639	22.651	22.217	21.629	32.736	23.313
24.863	30.91	36.972	42.981	42.467	37.189	31.577	23.518	21.871	20.302	32.736	23.844
63.749	60.953	84.669	74.049	77.065	71.976	43.733	49.027	43.662	35.937	63.348	64.363
97.112	147.65	117.47	107.46	101.87	111.57	155.83	123.93	167.47	189.74	108.83	110.23
89.504	91.168	86.506	88.322	92.391	70.746	108.69	109.66	94.471	118.79	78.435	74.518
107.46	57.686	66.629	77.553	86.904	50.499	51.25	49.058	50.203	67.736	80.797	37.415
35.342	37.973	47.188	49.941	49.194	36.945	31.643	36.693	30.696	37.373	46.661	22.073
79.163	122.76	125.89	180.53	192.41	121.88	106.29	72.023	77.467	120.55	125.65	68.73
62.806	107.84	98.972	122.21	109.39	77.965	110.78	68.356	77.362	118.83	138.09	81.356
99.201	97.767	98.21	91.345	95.904	102.39	99.065	93.952	87.075	94.892	87.074	81.356
85.292	109.81	117.47	95.341	94.309	90.404	99.065	70.428	131.62	79.792	95.822	69.23
72.076	68.964	60.754	76.691	60.71	54.372	107.43	66.688	69.591	80.988	108.08	105.96
149.46	116.59	80.555	88.948	95.943	65.499	168.19	117.8	110.79	150.16	128.46	105.96
95.695	77.875	70.378	77.332	88.403	52.799	72.102	94.016	68.952	79.925	97.598	53.119
99.854	89.568	95.693	122.83	127.81	95.289	80.537	100.82	75.794	68.477	107.19	55.711
95.953	135	100.51	132.32	135.15	95.289	134.21	133.99	126.73	155.53	114.57	97.852
90.934	129.4	123.77	137.68	125.82	103.8	135.99	125.42	132.05	159.62	105.8	101.64
154.64	196.75	224.95	314.69	291.4	184.8	181.53	187.66	139.58	217.54	176.48	166.45
79.015	86.882	90.57	96.867	97.15	76.44	100.24	93.145	86.262	130.8	71.077	94.447
79.015	86.882	74.636	83.861	81.538	68.405	93.889	93.56	86.262	96.885	55.71	80.692
130.25	107.28	141.16	140.08	137.44	165.02	103.74	130.63	102.17	89.507	108.53	68.121
125.55	105.43	110.66	97.198	96.418	97.959	103.74	115.54	159.75	89.507	97.142	114.4
125.16	131.28	140.99	118.2	124.81	118.2	132.67	171.43	153.02	190.5	122.51	113.47
107.63	131.28	108.84	114.57	94.468	99.133	132.67	176.46	153.02	190.5	115.68	113.47
27.601	14.777	18.91	22.681	14.975	17.876	14.108	15.094	18.545	15.519	18.144	25.888
28.634	20.645	23.696	28.598	25.903	22.216	17.108	13.587	15.137	18.195	16.446	16.874
28.634	36.476	43.411	46.735	46.976	69.912	26.814	29.792	41.212	28.118	25.167	17.119
74.49	51.903	60.033	44.884	53.078	96.999	63.309	61.308	154.29	42.765	70.263	43.967
74.49	80.637	63.766	82.669	93.565	71.484	110.06	61.308	97.135	132.07	72.965	75.753
68.776	112.64	86.738	91.038	93.565	71.484	135.91	98.354	130.03	149.74	92.51	102.1
67.536	104.36	91.451	86.343	94.058	86.301	110.78	109.78	111.39	128.44	105.62	85.363
81.742	133.78	152.61	145.97	163.28	131.26	129.37	106.99	112.12	126.34	126.52	93.378
168.23	122.89	137.17	125.82	121.57	157.66	114.98	153.43	120.61	127.48	146.02	85.345
173.94	123.56	173.64	154.81	183.93	165.5	166.07	159.99	112.86	120.73	164.58	101.32
112.28	172.67	138.98	137.7	126	131.33	183.71	153.18	169.25	202.18	160.9	134.57
112.28	90.605	89.739	110.23	123.19	78.509	86.016	86.233	76.375	116.45	92.536	52.098
130.87	102.94	110.81	132.9	122.68	141.84	94.835	138.8	86.062	66.175	93.636	49.848
93.614	84.117	93.936	93.485	89.707	87.679	92.156	84.231	85.528	118.51	65.926	61.351
97.8	74.704	66.664	93.485	91.165	68.939	72.713	61.034	63.231	90.856	72.592	59.323
130.45	78.931	95.821	114.11	109.15	82.092	93.462	77.517	67.61	81.525	66.93	81.246
163.48	165.2	189.86	185.6	198.16	165.87	141.39	119.46	117.06	114.53	144.92	98.265
111.21	176.85	184.06	179.45	167.13	159.44	156.29	154.82	128.22	176.13	177.01	110.43
137.51	107.67	90.899	98.776	110.05	80.376	97.612	116.94	109.19	127.86	132.69	79.3
85.085	114.7	111.19	108.32	106.37	105.56	107.48	131.51	125.82	130.9	75.577	79.3
125.91	81.993	92.483	87.321	84.176	84.299	77.601	91.198	69.367	73.721	67.283	49.713
121.54	105.99	119.58	136.69	135.66	103.4	77.055	91.612	126.74	101.71	75.616	66.872
148.13	155.9	137.58	80.544	80.008	122.24	157.8	156.78	168.77	155.88	123.27	105.84
167.33	114.95	142.18	80.544	79.14	122.24	91.719	137.87	104.76	77.467	123.47	73.164
69.928	60.63	64.262	55.136	57.678	68.053	74.828	85.454	59.224	75.038	75.186	48.279
155.8	171.37	183.62	194.73	181.94	153.58	154.72	197.81	170.36	178.21	160.76	107.98
119.24	171.82	148.44	135.79	146.14	128.12	189.82	181.03	171.59	169.76	163.74	130.27
140.8	155.22	157.59	176.32	183.69	129.91	131.49	147.15	135.01	160.69	162.68	112.72
207.05	186.7	192.17	195.63	202.73	167.41	200.36	178.63	174.74	193.43	189.2	124.4
181.12	267	255.42	247.35	247.82	239.47	233.93	236.24	211.49	248.91	240.66	180.44
111.44	193.81	194.77	200.17	184.11	163.3	177.4	181.6	200.32	253.48	192.98	139.81
101.54	168.1	177.89	198.07	169.77	139.09	151.6	152.9	139.16	177.62	141.89	101.33
97.135	111.84	142.23	152.92	165.01	121.19	113.26	88.441	84.876	99.119	124.84	68.597
104.37	119.24	141.51	120.7	133.27	118.28	121.73	109.76	79.266	99.405	128.41	66.439
141.5	133.63	157.5	126.57	133.53	138.01	127.23	148.5	172.91	105.96	132.62	81.057
133.07	133.63	142.72	113.7	117.8	122.9	127.23	165.99	162.19	84.94	131.22	81.057
88.77	107.87	118.06	121.12	126.14	96.727	106.15	124.67	96.14	118.2	79.585	72.723
128.13	101.14	120.83	114.74	119.7	113.32	78.836	114.69	90.532	79.12	86.057	60.997
42.478	56.133	43.348	36.537	41.383	40.126	72.905	61.334	126.96	61.34	46.6	46.109
71.238	102.33	59.313	50.742	47.316	65.58	249.05	83.701	112.41	101.78	47.005	50.297
72.767	117.59	85.236	76.155	81.486	78.416	121.76	124.01	171.46	129.3	113.53	86.328
71.221	73.761	65.223	56.078	68.187	51.193	113.85	64.03	94.387	67.139	99.644	61.589
54.349	42.328	35.484	40.282	43.708	27.617	49.793	38.908	35.105	42.747	47.941	37.846
53.477	53.86	27.678	33.363	31.073	29.904	60.004	58.781	53.22	90.698	34.031	51.191
58.821	84.369	53.842	54.145	50.307	49.224	103.91	78.645	85.356	127.91	62.335	72.829
31.06	37.965	24.782	32.437	34.198	22.1	61.21	17.304	23.422	58.109	39.152	37.085
18.874	19.031	19.347	25.913	22.797	16.48	19.245	16.951	19.005	22.465	23.846	15.493
26.776	48.166	26.03	29.688	23.326	25.164	54.869	30.867	55.114	64.477	26.073	47.966
18.964	22.049	17.787	22.002	21.131	14.263	27.472	19.369	24.423	39.749	18.096	21.132
20.103	16.965	14.576	14.629	13.555	13.523	26.047	10.642	21.198	25.863	28.559	14.587
16.786	13.188	14.576	12.144	13.291	15.324	12.994	14.168	24.847	11.935	18.264	12.805
32.132	23.644	18.441	20.648	20.862	21.922	31.49	16.515	50.749	38.192	25.256	23.854
17.233	20.576	13.043	14.551	12.152	13.073	24.283	16.746	23.528	26.411	17.136	24.971
19.711	20.789	18.003	17.448	17.664	13.675	22.557	18.382	21.875	23.957	20.574	24.974
23.493	21.348	25.045	26.608	23.292	22.422	20.113	19.253	41.056	19.983	20.574	17.379
20.53	22.133	25.716	22.934	26.895	25.927	26.569	18.823	15.529	19.983	21.957	23.796
17.572	23.764	29.709	23.997	27.229	29.986	29.585	21.39	23.169	22.389	24.651	22.196
17.896	17.337	29.709	17.448	18.947	32.858	15.574	21.39	39.584	8.4396	15.83	20.332
44.569	46.242	62.501	63.791	64.868	52.293	35.042	41.196	45.352	27.688	60.506	24.717
30.9	56.577	34.616	39.511	30.7	30.234	63.703	51.041	63.734	105.62	36.804	50.253
70.866	88.043	73.496	63.792	71.625	62.997	95.672	89.488	104.76	97.148	59.088	88.258
77.915	118.7	86.555	80.373	70.238	77.414	136.39	117.82	137.15	197.8	59.36	99.033
112.67	147.56	121.01	114.92	117.31	104.3	155.57	111.86	125.91	141.75	148.24	101.15
100.12	124.82	104.73	92.649	114.87	92.151	124.63	111.25	119.78	144.83	112.92	104.58
46.455	55.769	66.363	57.005	60.219	55.95	58.521	49.553	53.414	39.91	66.467	37.915
68.367	78.638	69.186	69.036	65.841	61.306	82.04	87.468	83.618	106.64	57.257	54.236
63.498	71.803	64.103	69.889	68.7	61.306	76.089	87.385	76.88	89.789	66.275	54.236
81.764	75.439	70.587	71.265	74.394	70.909	83.503	90.257	100.52	95.027	66.275	58.492
87.376	65.956	71.336	70.818	75.305	63.517	70.75	70.346	73.301	72.376	111.54	46.969
116.03	152.93	132.56	134.93	134.03	108.45	141.96	130.65	139.01	183.74	146.62	101.87
143.52	157.36	132.56	128.02	135.58	125.37	170.96	188.03	143.88	183.74	146.62	115.28
103.32	104.38	105.72	128.02	135.58	95.867	97.887	97.691	83.665	119.7	105.38	71.909
112.68	166.93	129.2	120.42	125.9	129.09	169.35	185.04	179.72	197.39	133.57	117.1
136.84	107.6	101.89	101.41	103.28	94.656	95.058	120.41	93.939	94.346	91.439	76.951
73.996	65.682	69.727	71.371	67.511	58.779	54.894	54.321	48.631	46.637	58.786	46.515
114.68	97.632	109.22	73.029	80.651	90.096	103.02	117.79	111.45	62.818	112.58	74.287
93.001	96.843	82.344	108.67	87.75	83.285	98.258	73.16	80.59	122.16	78.813	65.591
158.81	86.313	97.033	97.774	110.05	90.017	75.836	93.95	90.521	86.142	82.589	51.653
190.38	203.85	212.6	199.15	226.34	219.77	235.04	227.65	189.77	199.04	175.76	169.29
110.29	140.75	122.55	161.39	164.66	129.56	146.88	159.54	138.45	178.12	128.71	87.744
149.78	147.23	122.55	111.12	109.11	121.49	142.97	179.94	173.52	156.44	128.71	84.37
165.69	140.17	143.4	123.3	122.68	111.79	130.61	150.15	139.29	137.45	137.92	83.572
141.55	162.36	138.4	102.64	97.386	111.79	189.32	166.53	177.15	162.61	175.6	123.28
114.59	168.29	173.14	166	168.54	152.83	161.59	166.53	134.93	140.31	168.18	95.025
114.92	91.752	111.25	120.5	128.41	88.929	84.216	126.66	82.937	90.112	83.519	66.564
89.258	95.219	83.771	69.352	62.025	84.103	110.98	112.15	105.56	111.78	84.938	66.756
103.37	117.47	118.35	167.12	156.13	95.602	105.54	99.009	90.628	125.98	115.58	71.582
103.37	98.063	107.91	131.8	122.28	94.903	88.614	104.83	94.142	89.068	87.812	66.314
165.43	114.14	118.81	95.525	88.874	101.68	99.313	148.26	153.5	137.58	72.479	82.014
45.218	63.89	51.203	48.06	48.185	47.251	73.18	78.306	81.381	119.72	49.778	65.764
91.201	72.013	58.195	50.491	51.66	54.718	80.797	75.461	92.346	92.49	59.996	50.218
60.413	55.706	47.466	50.491	51.66	41.419	61.734	70.122	61.478	78.846	50.787	34.46
95.634	153.62	124.09	110.51	122.04	117.4	146.6	115.95	116.84	152.43	146.24	94.623
150.04	157.6	124.09	121.05	130.5	117.4	174.58	156.81	142.94	195.21	142.02	94.821
65.641	130.3	85.478	121.05	112.06	75.239	138.8	129.89	132.34	177	115.42	78.503
100.25	61.017	51.688	58.454	68.516	47.891	75.914	75.764	97.267	96.721	66.219	49.254
115.55	94.829	81.929	104.13	95.64	67.593	113.69	88.188	105.96	166.43	81.66	76.571
115.55	127.11	124.61	183.83	189.23	99.032	102.42	108.78	125.43	160.03	110.45	79.015
67.977	130.64	135.4	158.09	153.87	120.63	134.95	92.581	108.93	166.02	109.5	79.691
70.69	130.64	102.49	133.84	136.21	89.789	125.33	95.369	101.69	129.63	129.24	70.201
153.58	58.772	53.163	63.479	65.406	41.108	80.111	79.604	75.511	76.234	94.414	59.607
88.069	105.85	114.74	99.231	96.162	102.7	94.879	108.63	99.146	96.03	112.29	63.468
139.71	105.85	116.64	116.12	106.16	102.7	94.879	132.12	101.45	85.86	106.66	66.008
139.71	90.564	82.233	63.702	64.776	78.206	86.112	109.01	88.883	85.86	98.163	57.528
123.41	58.874	58.748	58.253	62.736	48.229	52.59	69.412	65.777	61.373	67.628	36.617
71.315	58.874	53.379	54.355	49.446	50.092	58.836	62.077	47.678	55.486	75.48	38.853
43.419	60.919	37.297	42.458	39.082	35.634	69.283	72.75	60.952	90.394	47.24	46.141
59.886	148.29	145.38	102.03	103.88	115.37	172.46	155.54	132.54	154.9	160.21	117.34
59.628	46.712	32.324	38.518	43.379	28.715	44.407	52.54	54.253	55.263	51.587	35.967
27.886	27.452	20.138	19.987	21.705	27.475	25.813	29.902	57.779	44.846	31.309	23.734
38.657	27.765	22.224	22.763	23.306	18.724	34.18	29.902	33.82	30.976	30.782	28.485
22.339	19.766	18.11	14.752	14.448	16.529	25.018	28.108	23.365	28.436	18.09	21.141
23.079	21.583	13.82	14.271	10.337	16.682	29.712	36.437	29.16	35.086	24.138	32.117
22.861	40.475	26.242	25.416	24.609	24.52	59.97	20.946	58.199	62.117	31.427	47.215
23.456	15.463	13.122	12.69	15.273	23.24	22.66	17.848	23.388	28.202	24.282	15.577
23.456	23.247	17.33	20.08	22.527	17.951	21.296	17.866	21.351	28.356	17.872	31.91
22.6	12.152	16.57	13.217	14.899	12.387	12.837	12.994	14.529	7.3154	17.742	14.014
21.183	20.129	18.345	18.372	18.348	17.218	20.07	19.766	17.046	22.424	35.152	23.636
22.008	21.92	18.137	17.603	20.601	15.943	16.537	20.578	20.207	20.377	21.718	34.673
20.968	26.297	25.023	30.11	26.297	19.238	28.022	15.649	21.295	31.827	35.196	34.163
16.272	36.481	25.63	29.134	28.578	20.851	54.393	21.511	36.993	45.872	36.575	42.296
18.131	23.153	20.108	23.224	21.699	16.222	31.893	14.617	22.806	31.467	24.52	24.434
15.962	20.858	17.441	14.954	17.456	16.147	23.819	14.548	17.568	23.372	20.88	19.206
15.995	17.99	17.441	12.059	12.795	14.06	20.296	17.042	32.739	21.504	14.798	17.262
34.627	23.769	27.974	22.775	26.56	34.228	26.97	23.338	23.326	18.837	30.8	22.331
24.054	21.847	24.103	19.929	22.734	21.634	18.28	22.212	26.535	16.422	27.993	15.71
30.476	22.014	28.274	24.496	27.271	28.325	24.033	31.686	36.753	24.157	32.996	22.507
27.294	21.622	20.391	19.739	21.29	17.381	22.336	15.9	23.778	24.697	31.909	24.524
28.409	21.489	22.092	20.938	21.988	18.314	19.783	28.456	25.144	18.373	24.804	20.367
36.283	21.489	21.018	18.066	20.49	22.82	19.783	16.354	20.477	20.127	23.975	23.426
19.329	17.508	21.395	26.409	22.35	24.556	15.663	16.085	39.72	17.67	30.322	27.233
22.756	15.448	12.295	15.567	17.011	21.213	22.976	11.172	12.858	16.527	43.262	22.264
27.054	15.31	12.805	14.847	16.388	15.649	16.299	14.56	11.87	14.186	15.782	18.824
33.117	16.04	17.257	19.739	16.407	15.386	16.299	13.56	26.35	16.717	24.207	21.918
24.464	12.117	15.305	14.009	14.672	12.223	12.714	14.835	23.614	13.355	12.789	16.293
22.796	21.541	17.367	22.071	22.475	21.042	21.553	15.502	20.94	23.693	38.874	25.1
45.324	31.02	23.723	23.121	25.18	25.365	49.831	20.925	22.352	51.569	41.147	30.101
28.754	19.193	12.711	17.364	16.646	16.449	36.233	18.575	35.145	48.084	17.891	24.938
42.599	23.46	12.711	19.293	18.82	13.461	39.311	20.382	18.871	41.963	24.255	33.331
18.315	10.619	12.285	12.365	13.802	10.999	8.4927	9.7526	8.4601	11.036	24.499	8.1263
22.147	10.619	12.703	11.706	14.075	12.09	8.0949	8.9435	7.7756	6.9793	29.47	5.9055
19.771	15.598	22.284	17.169	20.746	17.395	14.127	14.199	13.042	12.144	30.176	13.549
27.494	26.802	23.935	23.705	26.79	19.504	37.145	16.598	20.738	26.025	43.117	22.525
31.798	27.743	24.905	26.081	29.749	21.601	42.373	24.019	20.674	31.521	43.372	29.711
50.013	36.954	47.857	47.092	43.96	33.557	28.993	27.5	20.663	26.182	39.676	23.159
26.949	21.97	32.893	30.929	24.397	42.32	14.685	24.088	29.676	12.195	28.945	17.017
26.086	20.709	25.283	26.492	23.825	19.527	15.54	16.64	38.844	17.239	28.945	10.367
24.951	19.38	31.454	30.04	30.622	26.396	10.505	13.757	22.67	14.826	26.224	10.367
47.814	54.41	51.123	62.801	57.177	47.007	45.849	32.952	35.536	38.066	65.07	29.343
82.33	114.02	82.992	96.73	80.411	86.182	123.13	79.714	128.47	159.48	116.74	82.19
139.28	176.1	127.29	152.49	129.66	122.96	188.67	123.57	162.18	235.15	156.12	118.99
70.035	53.76	54.224	66.923	65.514	53.686	59.658	55.018	67.02	70.823	41.141	41.659
109.55	106.77	109.56	112.84	115.66	92.728	101.19	68.343	117.66	120.91	98.326	65.658
134.8	181.41	159.22	146.17	124.12	147.84	179.31	164.35	189.85	179.63	194.81	117.49
99.991	64.886	77.088	71.902	84.991	65.324	58.86	64.116	53.047	53.251	75.68	45.419
126.69	88.394	82.042	97.319	96.118	71.189	93.43	72.449	101.37	137.23	80.774	64.319
161.71	150.89	156.49	153.67	130.22	142.16	130.86	160.6	146.35	147.85	106.22	95.514
134.67	122.24	120.78	104.11	95.578	122.35	111.21	134.04	111.66	106.07	148.38	78.123
61.807	67.422	94.714	82.767	99.446	85.139	52.356	93.849	86.29	56.298	61.088	39.087
148.87	133.73	126.65	109.92	105.97	113.83	155.58	129.74	166.57	129.33	113.47	97.563
112.61	110.16	119.86	106.11	118.7	113.83	109.25	115.48	95.172	102.62	101.69	77.034
138.97	146.9	117.22	143.65	128.24	120.05	108.52	131.17	113.78	170.1	133.79	60.875
61.007	45.034	52.904	50.518	51.681	52.098	35.234	44.381	48.34	35.122	51.868	27.827
34.545	23.871	33.084	28.962	27.265	25.056	18.135	22.748	36.076	24.923	23.625	13.749
21.227	29.342	43.797	37.493	36.319	43.844	21.385	33.472	23.906	16.29	24.63	13.749
40.472	43.718	65.494	64.635	64.737	75.691	28.96	39.381	27.913	29.396	44.713	21.845
27.285	28.806	39.73	33.916	32.999	41.202	21.351	29.826	27.913	19.42	29.415	23.403
20.303	29.507	42.43	36.83	36.519	52.023	19.344	25.572	47.112	17.177	34.031	20.731
29.888	41.254	63.468	60.531	56.318	57.719	31.179	33.927	52.606	25.699	40.28	15.913
37.516	34.626	42.733	48.353	41.453	44.305	21.145	30.552	38.014	16.411	42.525	20.474
37.533	30.712	44.27	48.353	41.453	47.608	24.096	32.543	32.428	17.94	41.221	20.474
43.66	39.423	49.571	48.703	39.782	57.026	28.451	32.543	44.703	24.274	45.615	25.301
40.03	33.201	49.571	47.353	37.745	50.363	26.728	31.297	30.34	25.179	34.141	21.862
32.694	32.487	34.749	41.899	36.613	34.38	16.247	20.803	25.911	19.184	15.573	26.182
20.33	27.8	39.143	33.276	34.378	43.964	22.039	25.153	29.739	17.801	24.072	26.389
23.839	29.046	37.61	38.001	34.542	54.782	20.871	26.093	38.255	16.541	24.407	41.326
35.051	40.045	62.567	55.219	55.038	51.175	28.818	39.4	40.118	24.544	28.626	29.392
51.075	47.181	63.352	59.707	57.521	39.274	33.216	45.723	43.447	27.066	51.308	30.34
31.457	33.995	45.849	45.094	42.393	46.358	20.451	30.651	46.505	21.641	32.904	14.303
22.132	25.246	41.589	37.324	31.503	65.589	15.791	24.268	32.513	18.354	28.038	11.633
34.429	30.219	41.385	40.504	40.248	41.04	22.016	29.596	36.309	20.781	25.953	22.826
47.305	42.25	54.045	40.504	49.531	43.998	28.856	36.355	32.862	25.16	35.261	26.292
252.67	49.945	58.613	60.348	61.625	64.206	34.673	41.682	44.607	25.495	48.277	34.058
90.029	58.523	75.442	69.408	63.358	64.206	38.875	58.309	57.856	23.524	94.107	39.669
111.99	20.377	31.272	20.214	19.487	35.381	19.732	25.832	20.246	10.166	45.162	22.851
95.755	42.894	60.856	49.972	51.968	79.44	42.77	45.467	35.117	26.274	52.548	32.796
91.034	30.569	35.812	46.753	32.344	39.462	18.062	23.354	29.583	18.981	56.227	30.902
47.284	36.209	51.265	41.446	34.099	37.37	30.674	38.596	29.646	15.795	48.519	26.701
29.419	33.858	46.972	35.254	35.135	42.629	29.273	38.596	29.646	18.136	51.768	25.516
37.348	33.073	39.144	34.784	33.729	41.798	28.186	34.531	27.904	15.018	41.697	25.683
38.047	34.573	44.07	30.261	32.913	38.342	33.135	35.674	28.879	17.794	47.418	25.683
40.934	38.893	44.07	30.261	34.558	44.316	33.135	35.674	54.515	18.197	47.418	60.595
29.717	32.335	38.821	39.181	42.469	30.082	27.339	29.793	22.567	20.214	29.201	23.709
40.895	44.837	49.218	44.59	54.031	35.995	28.506	40.28	36.888	28.364	41.616	24.378
34.001	28.39	34.632	36.609	32.866	43.117	23.716	26.147	32.532	23.943	27.56	35.712
61.421	37.513	47.253	43.696	42.376	47.746	25.692	41.076	33.207	23.806	40.668	28.948
49.218	30.065	32.103	47.549	48.958	38.203	18.328	21.768	18.34	24.484	42.982	20.773
51.785	34.544	51.83	46.495	48.958	51.819	30.681	41.025	42.133	27.079	47.109	30.584
64.259	31.352	57.332	33.595	39.934	61.137	35.233	40.092	32.458	20.392	38.304	26.091
45.82	32.151	36.802	51.117	45.024	46.714	24.102	24.657	37.633	26.058	24.988	17.528
41.179	21.182	29.253	25.189	24.597	48.088	19.779	20.989	37.633	18.465	27.38	15.774
39.151	35.055	47.09	36.508	37.883	48.088	27.653	28.351	26.867	17.282	28.695	19.882
46.84	42.905	51.743	45.832	46.173	58.487	41.652	41.009	32.19	18.557	49.557	30.403
45.715	47.175	69.701	51.863	59.739	62.276	42.972	48.293	40.775	20.594	55.558	36.908
71.464	56.655	83.597	60.148	64.654	85.548	48.429	58.898	48	23.336	55.6	36.657
49.608	55.304	83.116	52.469	59.621	79.195	47.184	59.117	55.673	17.568	74.657	52.986
49.608	55.304	83.116	52.469	59.621	72.564	45.276	49.255	42.293	19.457	60.164	45.518
23.991	25.317	30.592	28.279	30.75	26.712	18.589	24.206	28.835	22.612	24.857	22.918
58.646	49.854	63.698	52.461	56.045	88.194	46.49	49.474	40.746	19.951	57.993	33.68
36.724	32.814	45.162	37.819	40.749	42.985	24.215	27.093	28.668	13.028	27.073	23.054
56.805	38.457	54.276	35.124	34.702	45.627	37.543	46.357	46.654	15.997	49.245	32.826
45.545	37.962	54.414	42.874	46.227	46.536	39.472	49.166	38.395	32.444	49.245	32.411
60.276	46.706	67.095	60.453	57.026	67.612	39.472	49.216	38.41	35.563	38.585	34.488
46.672	41.16	50.067	60.535	56.22	40.991	28.21	36.761	32.295	35.261	31.585	24.773
47.142	40.609	50.067	49.772	46.872	39.005	28.228	36.594	34.476	29.376	29.312	28.613
47.142	48.534	65.789	66.067	71.629	53.39	40.218	43.029	37.454	32.696	45.288	30.212
40.096	39.736	54.411	45.921	47.084	59.157	28.394	38.402	33.203	20.448	35.99	31.992
24.785	26.627	42.344	33.522	32.872	59.95	26.23	27.634	27.893	11.036	35.99	25.248
54.867	58.734	92.824	55.201	50.924	88.357	47.895	67.399	60.286	21.79	72.218	52.762
58.523	42.948	58.216	47.523	49.564	55.365	34.898	53.682	52.995	22.215	55.013	36.169
65.047	48.927	58.216	49.114	52.759	55.365	39.281	54.058	49.952	21.093	57.8	36.854
62.47	39.259	64.096	44.235	37.409	59.533	33.34	43.739	47.124	12.374	49.368	29.01
35.159	35.783	49.913	40.129	34.647	55.232	35.352	36.239	44.572	16.674	40.63	44.978
43.435	28.749	36.32	26.547	28.497	37.797	26.353	32.741	26.247	8.5364	30.078	31.645
35.168	22.619	36.878	29.846	30.748	33.457	20.73	22.032	38.074	11.663	33.431	15.329
62.338	45.192	52.704	57.746	54.416	49.54	28.982	43.994	47.051	29.997	41.478	33.212
32.873	30.282	42.476	39.557	39.168	38.257	38.193	30.752	40.498	14.542	43.155	22.276
46.257	38.378	46.083	42.647	41.313	54.288	38.193	47.504	40.498	14.542	43.155	29.702
43.644	26.639	36.516	35.788	34.33	29.261	24.099	27.857	21.256	13.01	33.927	17.629
48.453	26.639	36.516	36.448	35.293	41.423	21.81	26.967	27.835	13.404	33.927	23.152
29.927	19.391	27.098	28.75	22.03	40.433	14.359	17.439	43.63	14.642	18.6	13.78
30.734	28.286	25.627	28.585	26.147	36.418	14.796	19.467	32.058	18.627	34.967	29.752
43.72	42.437	51.574	63.45	63.638	50.677	32.827	32.344	37.704	29.177	39.103	21.759
52.015	42.762	51.574	51.423	44.664	53.163	30.94	33.377	35.698	29.177	29.55	25.162
39.351	29.162	33.97	42.814	39.949	54.403	17.482	25.057	31.915	22.223	20.328	25.968
33.64	20.297	27.411	25.883	22.946	34.987	17.482	25.791	27.418	13.045	22.357	15.492
29.686	18.469	25.125	20.331	19.69	24.908	14.045	21.909	24.768	12.111	19.221	11.578
28.428	28.135	25.125	45.214	45.722	28.376	19.852	22.336	22.244	23.745	26.196	23.515
52.22	45.381	49.788	53.545	59.314	39.019	42.844	48.528	44.069	18.301	63.895	30.46
44.708	28.573	35.944	32.083	39.948	47.437	22.658	30.041	34.101	13.158	41.356	19.536
40.854	21.203	25.221	29.465	28.652	28.724	18.659	22.721	17.717	14.455	43.563	17.779
40.854	25.571	27.348	46.107	42.45	23.536	22.487	22.418	20.748	29.907	19.722	17.334
33.258	37.23	38.601	46.107	42.45	46.261	24.071	27.347	44.562	24.69	26.359	21.044
37.618	35.67	35.32	43.09	37.04	39.226	27.596	27.504	60.289	26.129	29.597	16.689
46.225	42.712	50.638	46.056	51.635	44.74	37.001	45.452	51.716	27.598	31.839	32.934
72.392	58.384	53.424	63.087	52.406	41.457	70.602	69.164	93.128	78.004	62.003	53.918
67.546	65.44	71.319	60.016	59.415	54.912	78.011	64.065	56.424	73.812	70.701	54.105
95.349	156.85	121.49	130.15	129.84	101.02	154.96	136.17	140.88	162.06	134.56	103.49
67.28	203.09	168.03	189.28	195.04	145.62	163.02	141.77	138.61	184.43	166.23	104.64
123.94	63.759	63.866	55.709	66.417	47.486	80.657	83.124	54.113	81.56	66.514	60.16
44.391	27.847	42.04	42.878	47.606	43.938	31.563	30.71	46.414	32.68	55.219	24.114
87.39	185.28	170.01	143.95	145.29	152.78	155.63	170.12	152.01	153.33	177.81	119.78
102.88	106.8	82.476	55.214	59.88	83.579	126.47	126.26	112.41	102.35	94.374	97.545
83.5	70.704	64.101	54.945	73.133	62.145	72.957	96.433	76.344	79.996	87.338	51.953
53.963	108.59	144.87	160.28	169.27	120.25	93.453	92.861	94.971	105.17	110.18	68.145
76.246	154.71	137.29	110.15	104.7	120.25	143.28	92.861	115.5	176.14	153.01	83.043
83.943	71.408	49.106	65.749	73.871	42.198	107.94	89.374	89.199	110.1	102.59	81.469
87.415	173.42	133.21	87.469	85.954	126.11	174.66	113.51	141.25	192.38	147.18	107.13
70.228	126.58	131.75	134.25	129.1	124.5	117.64	113.51	103.1	130.76	143.51	76.022
136.42	166.33	144.02	140.27	158.09	154.05	162.98	148.69	125.76	171.56	175.39	118.89
123.65	110.83	117.24	96.318	104.8	116.16	113.18	148.69	125.69	129.73	138.34	89.552
89.056	85.094	91.954	90.798	104.8	73.138	99.124	68.158	62.013	68.662	121.56	65.127
140.67	104.03	140.16	152.63	172.46	133.08	97.648	79.521	70.482	67.06	124.21	55.783
66.619	86.925	92.561	102.65	102.65	87.701	102.42	84.464	136.33	118.14	117.13	64.821
133.1	117.85	115.37	91.598	94.33	95.035	135.25	156.27	136.33	147.66	143.38	94.57
110.39	116.9	74.821	93.688	84.481	67.54	106.6	108.88	117.68	163.59	94.962	74.775
64.013	42.758	47.799	54.164	55.64	44.617	41.553	43.159	36.783	39.019	52.797	37.992
135.45	88.442	87.165	86.897	73.681	88.663	112.82	81.517	96.725	103.31	78.229	72.946
117.18	73.548	55.84	87.718	85.539	49.851	86.567	105.29	102.32	91.519	67.056	62.198
70.149	65.878	46.721	63.934	63.937	49.387	77.551	66.251	72.041	83.171	69.004	57.546
73.426	91.185	69.225	95.987	103.62	61.339	94.479	77.542	80.841	89.827	83.504	82.424
73.222	108.83	117.37	143.48	153.63	90.611	95.645	108.16	95.69	96.133	106.62	68.584
108.74	144.58	136.11	164.53	153.63	120.6	174.13	162.43	153.43	149.99	147.32	110.72
108.74	84.037	74.2	85.685	91.491	70.709	99.068	87.627	82.569	116.48	100.04	52.142
38.574	40.962	35.967	36.391	37.403	44.832	60.439	42.67	44.372	72.232	45.34	38.014
85.909	99.981	111.82	98.234	75.679	85.09	118.33	104.59	111.98	112.82	84.532	72.66
86.209	77.904	77.548	90.945	87.968	61.6	80.225	59.56	65.305	82.61	101.52	46.435
66.833	95.909	77.548	95.975	105.95	79.325	98.823	66.053	105.95	99.573	104.64	51.926
108.58	169.02	152.35	131.01	139.33	123.01	161.97	131.85	142.25	167.2	161.43	90.018
78.383	51.267	51.755	61.135	59.77	40.997	35.866	42.253	53.832	36.3	40.693	31.45
65.643	70.624	80.128	57.548	62.21	69.355	66.735	77.582	59.47	46.553	73.137	42.529
69.806	83.568	76.543	74.537	78.468	61.007	66.735	78.257	75.937	96.41	77.248	47.721
74.284	74.896	67.505	71.556	70.801	64.713	80.697	78.35	69.727	82.278	78.953	54.165
116.93	61.305	61.251	48.725	44.691	48.901	73.936	78.35	66.687	84.474	80.484	49.705
72.659	63.108	68.266	100.45	78.498	70.1	59.012	57.853	46.971	67.302	52.994	44.587
62.378	113.91	104.23	112.12	103.33	91.956	105	98.569	89.647	110.26	96.27	72.02
100.53	77.618	68.722	59.04	40.612	55.226	88.373	79.62	75.19	82.997	73.505	64.852
124.44	101.77	107.12	109.32	115.99	106.68	101.27	88.567	85.977	109.21	132.54	62.375
77.878	114.09	115.4	123.81	130.98	99.739	133.35	115.38	100.22	138.88	117.37	84.51
163.66	178.64	230.91	159.71	191.28	184.31	191.21	172.72	161.29	138.88	207.73	118.4
146.69	104.98	126.57	135.01	155.42	112.68	120.39	134.58	107.91	83.523	123.5	73.659
100.82	86.05	92.136	107.14	111.05	76.931	84.326	88.048	76.011	95.494	116.79	70.625
162.26	135.32	123.64	84.386	78.37	118.2	148.35	185.66	169.42	137.28	129.76	111.01
120.01	128.06	101.88	84.386	78.37	98.395	139.27	113.73	107.8	144.38	105.62	85.56
108.14	143.88	138.13	151.12	146.61	132.39	157.16	137.06	139.71	204.98	165.86	89.787
137.77	160.16	130.48	117.21	116.49	122.61	191.39	180.49	169.7	204.98	165.86	108.34
137.77	160.16	176.49	197.27	181.33	148.49	147.32	138.62	127.45	169.18	137.34	101.94
90.825	92.339	82.139	62.981	76.325	77.329	106.87	110.75	116.64	104.43	90.499	68.546
85.922	104.86	79.914	62.623	76.325	80.4	132.42	122.62	136.52	158.8	56.971	99.881
94.883	72.071	92.594	97.61	107.02	86.419	73.988	99.141	123.23	69.14	96.646	63.795
90.664	135.05	105.21	133.7	141.44	82.642	158.91	118.66	112.75	149.05	152.34	91.823
172.36	135.05	115.01	108.54	125.48	97.903	158.91	150.83	158.51	140.95	190.54	101.8
172.36	114.31	106.24	98.273	119.41	95.694	143.34	130.95	122.67	123.72	142.78	86.594
117.31	105.27	130.24	160.11	178.86	106.55	108.5	142.12	149.88	97.634	128.34	70.002
119.8	175	174.21	216.56	223.47	142.13	145.58	142.12	204.25	168.18	175.8	87.065
91.878	203.5	168.91	179.78	169.24	145.92	210.33	167.85	177.4	234.3	205.01	139.67
157.94	167.23	195	187	203.57	149.02	191.36	181.92	169.68	231	241.03	109.97
203.03	177.65	187.46	175.99	185.18	168.11	202.06	228.73	194.18	202.86	187.46	137.79
181.74	245.05	265.35	208.99	203.06	221.42	212.06	209.93	277.49	211.87	247.98	120.81
125.11	97.929	73.608	65.29	70.234	70.609	135.5	124.39	138.35	134.34	86.971	93.694
92.417	56.695	54.945	62.134	60.616	48.266	79.48	74.409	86.038	68.557	62.214	42.443
123.46	77.581	108.11	135.78	136.98	85.606	70.134	80.167	76.36	71.259	89.879	48.159
148.4	129.32	153.89	150.18	151.36	134.09	108.5	138.96	104.57	79.064	152.46	82.745
210.87	198.79	197.56	192.76	207.62	162.06	204.51	184.18	183.64	217.47	196.55	99.329
209.52	194.54	173.76	148.81	158.82	147.58	238.72	283.98	227.46	200.55	220.6	127.28
133.18	143.09	170.87	167.78	183.58	147.48	141.48	160.54	129.68	126.43	160.28	129.01
133.18	137.13	170.87	217.5	221.67	150.13	136.21	143.55	164.22	140.37	133.17	96.485
105.09	113.23	128.17	120.17	114.42	107.71	114.24	88.025	93.711	112.73	133.17	77.23
172.58	166.92	130.02	120.17	111.97	117.81	204.82	196.85	209.29	218.13	158.18	121.17
111.26	90.597	100.78	57.459	81.915	87.739	128.52	141.26	130.58	114.72	99.567	82.752
97.317	171.75	212.12	248.91	261.22	179.65	130.43	131.64	115.2	150.63	145.43	87.719
159.26	174.07	179.98	199.14	202.49	148.49	171.96	158.37	133.04	163.66	172.56	108.45
240.25	203.73	202.75	139.03	161.7	162.14	234.83	264.2	192.29	183.38	247.29	117.32
143.7	154.45	180.41	159.89	171.49	141.93	139.35	168.38	138.2	179.91	141.94	85.95
180.42	184.76	207.38	207.37	217.66	179.2	181.95	197.57	227.25	178.79	173.75	119.72
105.92	188.33	170.89	183.15	195.09	141.6	184.32	174.9	213.07	194.79	178.15	130.48
141.49	146.79	154.36	135.11	131.63	129.08	149.57	142.42	137.4	164.33	134.3	111.73
141.49	79.274	104.28	84.393	83.181	92.213	101.27	109.54	105.66	72.037	104.96	74.644
108.51	42.046	70.412	58.169	54.355	60.9	32.119	64.073	41.082	51.738	46.789	54.205
104.72	112.65	96.209	65.575	71.024	90.491	111.02	155.94	128.91	125.16	98.384	86.853
119.88	112.65	117.38	75.855	84.807	113.59	122.16	188.52	128.91	109.09	113.95	94.04
125.65	84.116	126.99	87.018	93.714	109.8	76.728	123.58	89.318	83.373	101.94	60.257
166.91	230.11	249.58	311.49	337.79	205.44	196.75	223.12	198.35	219.54	224.93	156.23
185	210.56	208.41	222.42	226.09	174.74	183.64	176.76	181.84	177.91	207.24	120.2
56.118	105.38	90.119	136.14	130.29	80.618	101.28	92.505	110.45	114.74	115.71	58.621
170.67	198.19	181.92	215.22	202.1	162.51	186.37	209.23	171.16	174.59	180.05	110.23
223.01	163.14	140.26	121.07	117.7	129.43	181.07	179.76	147.87	172.01	126.55	96.426
268.22	235.84	252.54	164.72	186.45	231.93	233.24	301.21	286.74	185.64	229.32	168.22
183.13	240.88	228.83	187.94	200.02	190.49	211.88	238.09	221.43	190.49	273.43	125.88
173.39	116.32	100.58	87.422	89.237	89.396	152.12	148.88	128.31	147.14	143.83	87.968
144.59	103.12	98.266	85.182	81.699	92.273	119.9	148.88	197.27	136.69	104.47	71.79
158.26	165.69	150.67	178.98	173.79	124.94	162.65	146.03	156.03	163.62	129.56	109.5
134.43	155.52	138.37	230.38	199.62	130.56	136.27	133.26	103.05	183.68	129.56	81.7
127.98	155.52	138.37	202.04	199.62	115.55	123.27	125.74	105.27	184.38	100.51	81.7
180.99	179.65	220.81	202.04	230.05	184.58	155.39	155.84	144.48	184.38	186.86	83.024
180.99	194.64	220.81	176.35	182.96	184.58	172.51	181.02	164.28	223.16	186.86	104.99
209.02	143.17	139.69	107.12	132.67	128.98	135.02	140	165.47	105.56	139.85	81.974
183.78	149.48	156.04	138.97	142.46	131.28	135.02	128.44	136.57	111.39	149.91	80.615
122.55	149.48	179.06	138.97	123.72	165.34	139.3	137.66	136.57	139.03	112.18	110.42
122.55	176.89	145.05	194.98	175.83	119.84	162.33	152.78	143.6	222.61	109.53	94.584
73.335	98.234	75.815	86.618	68.08	70.442	105.62	101.95	87.706	129.52	67.213	76.617
99.567	68.998	85.312	90.864	88.351	79.827	54.379	77.079	274.24	42.155	85.895	40.036
176.38	128.89	130.5	121.21	115.13	109.91	122.75	119.96	171.98	138.57	126.41	75.661
67.035	77.88	61.072	49.655	53.059	54.395	70.171	88.204	83.735	99.539	71.448	53.884
131.33	160.63	141.9	124.75	108.44	128.62	191.15	177.43	164.56	186.89	170.73	123.17
158.62	239.73	237.16	280.33	300.75	194.87	189.35	171.66	175.72	244.43	229.46	117.71
129.17	158.62	129.66	130.6	143.73	118.76	198.24	144.27	133.34	178.9	174.9	107.45
134.65	121.28	129.37	113.57	110.4	118.17	126.57	139.64	153.94	139.91	134.55	86.619
178.75	132.39	129.37	124.43	135.27	113.35	162.86	177.53	145.27	134.41	130.48	109.49
99.645	109.5	128.11	135.31	152.96	106.99	102.38	109.57	103.03	88.081	123.95	83.138
70.524	64.47	69.878	71.62	64.763	59.335	67.816	64.205	125.19	79.487	59.669	48.806
98.856	117.26	133.72	143.01	139.74	122.27	121.29	111.84	162.7	91.018	149.3	96.273
51.951	33.392	32.505	36.901	35.17	29.075	32.376	32.494	37.857	42.218	25.412	21.208
34.846	27.562	31.997	38.618	39.713	36.062	25.247	28.265	27.709	27.717	25.055	23.515
50.946	47.661	62.107	63.772	60.311	47.349	48.691	42.253	40.357	37.324	45.615	38.969
46.625	47.661	56.17	48.581	49.851	47.349	44.611	42.253	85.819	31.1	41.889	35.339
78.552	54.019	74.53	70.889	66.653	57.141	44.611	45.239	66.367	38.831	54.497	40.037
83.345	48.245	54.64	57.935	59.077	49.779	54.785	67.915	45.396	48.682	62.981	42.024
60.988	65.659	66.342	52.134	50.294	61.081	64.476	71.195	60.083	50.65	60.921	50.346
95.536	90.158	93.771	111.37	117.11	79.46	97.583	71.195	75.907	100.42	79.084	62.298
128.92	111.09	117.67	117.42	121.95	102.6	116.41	86.493	156.02	96.578	106.67	86.547
101.88	81.052	79.84	64.855	70.698	66.536	105.74	99.1	75.334	77.447	103.93	72.295
104.54	88.026	88.884	93.343	85.512	103.6	91.662	86.133	75.113	100.1	81.898	64.987
145.08	108.23	112.83	125.2	118.28	98.894	87.602	108.84	103.23	117.13	102.88	68.698
60.689	72.238	78.027	51.557	53.626	66.381	79.35	90.359	131.16	90.332	102.88	60.985
65.736	66.664	69.127	78.54	74.481	57.507	87.523	67.417	107.73	90.332	99.542	60.985
144.04	75.626	81.543	98.105	91.979	74.059	87.523	117.87	84.838	114.93	86.22	62.306
156.43	122.39	146.9	143.42	168.98	117.74	142.76	110.47	131.84	120.55	135.22	96.281
105.84	151.56	166.28	173.2	175.46	133.09	139.44	102.96	136.47	133.78	155.27	75.148
61.837	69.859	72.808	92.15	97.386	71.894	52.824	73.159	54.993	76.212	76.04	42.119
98.668	149.51	115.22	125.25	135.11	116.08	141.29	161.72	147.01	154.52	122.86	110.27
186.93	201.9	230.6	197.85	208.7	195.82	176.56	204.65	185.5	200.07	144.81	142.6
120.25	126.42	147.6	154.92	156.8	125.04	151.83	135.99	143.35	167.12	144.81	91.056
118.24	54.36	60.268	52.405	64.046	68.564	55.255	72.028	57.807	45.21	93.312	46.885
59.728	58.03	61.22	56.526	57.042	61.298	54.101	78.159	67.296	55.149	46.099	45.926
126.76	131.4	113.16	78.14	88.867	95.457	126.34	127.48	96.956	120.12	135.86	97.304
145.27	107.4	123	110.83	110.79	110.01	83.813	126.6	110.79	77.266	107.01	92.69
88.975	118.94	120.51	130.95	140.59	101.5	97.958	118.92	125.54	104.61	117.38	68.21
100.16	149.99	115.99	115.89	96.291	104.89	158.64	150.06	149.84	168.83	121.31	101.81
198.42	165.27	176.57	145.96	155.08	161.97	200.35	184.66	159.31	164.83	178.74	123.33
129.6	109.56	97.232	108.45	110.56	86.544	127.75	109.58	133.98	124.98	90.93	80.572
140.23	247.32	276.84	283.44	308.47	224.53	197	181.58	156.4	200.3	189.58	127.12
186.58	246.61	245.41	231.24	220.59	223.29	204.21	181.58	156.4	200.3	174.91	127.12
131.31	125.78	101.2	96.483	90.885	91.713	131.06	119.09	125.77	145.53	119.9	87.507
97.497	108.02	89.281	119.29	125.42	83.882	111.98	101.1	115.71	115.09	103.46	79.088
100.35	86.276	92.989	93.362	98.358	87.543	103.62	82.434	78.189	81.554	102.36	69.574
70.044	71.949	85.11	76.772	82.453	77.877	85.358	78.199	70.687	62.148	86.499	49.206
110.15	80.946	85.11	80.222	82.453	68.215	88.212	97.706	115.66	68.354	95.115	57.086
77.616	121.73	123.6	101.58	97.11	107.82	113.16	136.5	119.57	111.15	111.11	75.801
83.179	121.73	117.99	133.65	139.85	107.82	112.06	95.243	76.079	111.15	88.256	73.132
90.896	87.838	81.336	57.964	62.344	70.785	98.5	95.243	93.211	105.38	103.51	75.908
130.45	192.19	179.33	196.97	208.77	163.53	181.59	140.39	173.16	176.08	159.09	132.43
130.45	173.54	161.4	185.12	191.06	140.58	185.22	159.49	147.66	207.57	176.38	103.64
144.83	132.93	146.18	170.83	189.72	117.61	119.41	137.36	119.42	142.11	127.8	70.382
104.64	113.43	112.87	107.44	101.24	96.906	118.79	98.089	90.264	107.17	127.8	65.357
112.36	113.43	112.87	107.44	101.24	96.906	113.7	123.66	125.39	107.17	106.26	78.158
79.83	97.391	81.363	79.221	78.05	65.571	96.077	103.97	113.02	126.89	75.988	78.158
47.945	58.427	47.618	50.007	45.966	43.065	72.095	66.876	74.136	102	50.736	44.402
105.52	68.453	65.01	61.596	64.6	54.771	77.132	45.581	45.285	57.308	83.709	44.402
54.906	99.741	86.686	83.702	88.786	76.219	98.54	111.34	91.021	121.84	90.685	65.584
52.953	62.131	45.467	50.667	55.671	40.537	78.061	55.566	64.224	76.06	77.054	54.493
46.723	42.492	50.797	41.877	36.731	43.025	39.046	45.676	40.835	40.833	45.402	27.932
37.717	30.342	33.25	41.084	31.781	27.089	29.358	24.389	27.316	27.118	33.843	18.512
71.005	92.331	75.11	61.505	61.117	68.211	117.63	91.55	111.49	103.28	101.26	75.054
66.915	84.283	64.441	53.936	50.081	56.145	96.641	80.556	99.954	86.492	85.785	66.549
45.139	75.852	60.73	59.335	60.922	54.245	98.575	77.351	90.019	99.386	67.657	66.124
45.139	97.844	71.411	61.601	59.22	62.982	130.77	83.657	90.019	167.09	84.542	109.88
65.69	80.969	76.352	70.688	73.432	60.32	95.447	70.126	67.008	97.011	114.67	68.198
76.772	80.969	83.761	100.97	112.88	60.32	82.79	79.253	69.064	84.178	103.61	52.54
83.957	70.293	77.221	108.92	112.32	60.689	72.411	83.438	63.364	70.644	76.398	42.839
83.957	79.273	68.208	68.776	69.324	60.689	88.2	102.48	97.942	115.59	74.599	70.74
112.71	58.161	68.208	42.353	43.467	56.96	55.584	69.292	66.719	57.031	74.599	43.991
112.71	103.26	101.35	68.108	67.583	90.597	112.94	107.86	95.918	111.69	115.87	76.958
110.75	113.78	119.72	113.64	121.53	95.112	143.3	126.33	106.91	115.26	120.8	79.225
127.9	120.63	122.99	132.73	132.22	99.183	121.69	131.86	121.39	130.37	141.01	79.601
39.128	74.719	68.636	74.239	71.097	65.241	61.396	67.069	70.071	96.549	52.433	39.459
93.892	140.24	134.75	159.81	154.97	109.62	125.82	125.62	110.85	135.56	138.01	75.69
93.892	123.95	124.96	115.97	124.11	102.65	116.34	108.55	110.31	116.41	104.87	85.614
135.75	134.8	124.96	123.65	119.59	102.65	121.66	119.94	116.87	148.77	126.73	90.699
140.94	128.24	133.65	143.69	159.9	112.36	127.25	180.22	150.6	173.35	123.77	100.41
52.722	88.078	98.281	115.28	105.05	82.569	77.493	72.168	72.668	73.682	76.792	59.28
104.91	187.32	148.66	136.08	121.25	132.83	207.6	156.97	163.59	197.28	181.56	122.41
165.98	143.52	144.94	129.37	144.92	119.86	150.1	117.58	120.27	148.26	169.1	89.616
109.35	130.47	132.22	135.93	131.56	106.05	120.17	116.2	123.91	158.63	98.044	81.071
159.37	240.76	237.33	201.04	182.98	213.17	214.38	264.99	227.05	215.38	202.87	164.24
184.12	210.7	209.63	225.11	235.39	170.45	201.16	168.16	153.67	229.91	203.47	127.64
152.17	201.74	209.63	249.84	261.94	160.62	177.89	149.23	150.68	209.52	180.1	104.83
112.51	133.05	137.47	145.07	140.88	116.27	148.05	159.97	123.91	177.81	129.39	94.388
102.29	135.36	141.59	169.02	160.39	116.72	134.09	159.97	125.85	136.37	123.64	75.442
124.03	107.97	89.651	85.778	77.454	77.945	105.16	160.07	218.59	127.81	114.42	67.07
107.77	107.45	101.87	94.401	88.585	92.978	98.082	126.29	122.08	92.934	88.766	72.257
113.77	72.866	88.422	75.824	77.229	82.141	65.872	117.73	107.14	73.86	101.85	55.645
153.62	120.82	128.71	82.229	73.259	113.76	133.55	148.91	117.84	121.79	134.8	87.726
109.18	150.36	172.53	175.48	170.44	151.12	119.12	124.18	124.04	103.54	143.09	72.434
53.583	89.145	90.585	120.33	116.46	83.442	89.693	79.079	79.151	95.419	91.476	49.781
79.609	89.145	85.73	82.497	71.533	72.208	91.269	88.448	90.228	139.51	59.126	68.126
143.37	143.57	144.88	139.5	138.08	139.93	122.13	150.51	130.74	144.38	93.008	84.876
83.283	88.015	87.322	107.45	97.4	73.808	75.801	86.961	79.877	125.98	96.353	47.76
106.44	112.51	109.87	134.48	148.72	82.161	145.79	104.47	149.53	132.22	132.45	84.152
91.891	121.47	95.375	111.19	90.469	80.287	113.53	160.45	151.62	143.78	106.05	84.495
194.12	199.5	209.32	243.11	215.42	172.54	171.1	188.16	178.62	169.24	155.6	113.08
203.26	186.58	181.39	176.61	190.75	151.95	171.1	219.56	178.62	177.72	147.38	113.08
131.12	119.26	139.36	137.26	149.62	113.47	103.96	107.12	157.3	106.3	114.1	57.95
112.26	109.37	117	112.02	111.3	96.301	103.96	79.302	76.678	102.07	92.399	68.459
88.077	96.44	84.357	86.413	77.926	73.219	101.24	108.23	100.22	128.13	57.933	66.338
99.037	79.655	69.025	75.933	63.099	61.833	71.548	108.23	82.472	87.715	63.721	55.602
112.2	117.05	117.7	127.08	123.53	102.63	113	111.93	101.1	115.41	88.508	74.871
83.845	107.61	93.334	96.331	95.726	84.728	109.72	115.24	148.39	100.25	92.719	79.981
170.37	155.45	187.18	128.81	147.12	165.72	130.4	155.67	136.63	96.965	208.41	81.207
193.13	158.99	165.33	137.09	155.79	151.07	163.95	171.11	138.42	156.02	152.93	122.14
81.513	130.3	99.863	104.71	92.021	106.34	122.16	111	109.82	183.7	121.3	72.854
100.09	105.16	99.863	102.36	92.021	88.551	122.16	119.43	102.22	125.12	92.907	63.925
69.238	138.82	103.81	110.75	99.928	99.488	154.57	115.09	131.64	173.34	114.75	81.578
125.51	106.16	104.09	110.75	104.63	87.383	111.23	119.48	116.11	118.44	137.83	77.512
83.407	88.478	76.751	56.401	68.511	64.16	106.27	102.08	89.079	123.43	96.63	66.889
43.052	30.295	37.386	39.491	41.745	38.738	23.42	34.643	26.071	20.708	33.647	20.275
91.285	85.592	103.2	62.751	63.875	86.88	120.37	92.111	98.526	99.442	91.506	80.623
93.714	100.06	80.233	84.182	83.879	74.412	97.824	101.13	106.62	117.51	93.424	65.427
110.38	107.31	91.798	83.73	85.733	87.877	111.76	133.5	148.08	137.81	87.056	82.497
142.35	132.89	109.61	88.223	85.733	99.623	147.49	158.24	147.25	146.2	116.64	91.561
107.25	130.07	110.4	90.322	98.336	104.7	110.21	114.25	118.36	146.67	138.56	73.136
114.88	71.67	102.4	101.46	104.07	83.929	91.93	62.814	54.13	60.533	81.36	65.021
156.28	136.09	141.91	135.41	121.34	143.36	143.47	143.79	122.09	159.93	110.54	100.63
150.75	123.79	108.04	118.62	106.81	101.27	101.87	145.89	125.41	136.96	72.204	76.173
76.934	63.435	79.774	76.355	77.146	70.55	68.923	60.543	54.812	45.809	68.539	39.335
79.407	113.98	136.59	109.95	112.07	116.93	96.482	129.03	100.83	99.358	99.436	65.872
135.2	199.01	224.5	218.62	214.19	198.55	165.81	196.62	179.63	206.64	153.14	128.15
192.62	309.68	298.42	230.09	232.73	250.53	258.63	243.75	215.57	274.85	271.24	170.25
142.5	210.2	177.65	209.71	200.38	152.81	208.08	166.72	177.68	215.38	159.63	128.16
142.5	110.69	97.413	124.04	126.23	82.782	137.61	87.014	118.75	131.95	91.148	80.825
223.57	170.73	176.33	143.16	140.23	170.63	171.87	201.84	179.07	188.88	182.17	123.25
245.61	233.94	287.72	272.57	269.51	252.25	198.81	255.96	199.99	200.68	204.23	128.31
182.18	115.09	134.64	105.99	107.47	127.2	97.159	155.5	125.48	104.63	106.94	77.072
183.07	137.67	140.56	122.36	113.49	121.63	130.25	148.31	119.44	130.32	116.04	96.472
104.12	92.34	86.462	84.868	78.135	78.487	111.41	115.34	92.592	129.29	90.363	91.799
123.54	169.11	151.39	175.55	171.04	123.03	182.93	149.84	135.03	183.59	173.85	116.52
140.11	217.11	193.36	172.23	179.99	168.86	199.45	198.1	180.54	244.21	202.53	145.79
170.35	154.36	151.96	158.68	168.25	134.01	149.93	142.22	134.74	170.74	206.51	102.7
137.49	174.73	180.9	188.93	202.5	164.2	149.93	154.64	148.65	162.13	204.9	103.44
94.778	133.66	115.03	138.04	124.85	104.32	137.84	109.96	121.24	145.69	134.15	73.935
116.25	120.3	105.41	165.02	152.37	89.958	141.22	109.96	97.786	176.32	106.84	73.935
163.07	185.6	178.61	185.48	200.55	157.47	212.58	205.82	175.6	215.06	162.58	128.89
146.8	174.01	178.61	181.24	199.44	157.47	157.88	136.27	149.52	174.16	166.77	111.47
157.22	203.66	186.69	209.03	194.09	167.8	191.98	199.39	200.75	240.91	175.13	124.42
154.74	189.53	180.25	158.28	152.86	162.34	169.29	194.62	181.85	169.26	165.45	118.34
110.1	135.45	140.66	157.92	142.09	124.94	125.27	143.53	138.81	188.01	115.16	85.637
123.86	135.45	140.66	135.75	130.8	122.75	121.88	143.53	135.94	161.62	113.51	85.637
123.86	93.536	102.63	100.5	105.91	91.083	89.3	123.31	84.238	125.28	94.759	70.846
164.99	159.81	152.6	154.42	149.33	139.94	173.53	167.06	144.98	195.68	163.25	115.45
64.87	51.379	64.542	77.156	61.463	53.655	52.415	75.673	78.211	72.444	43.277	47.694
85.436	94.184	85.32	80.294	71.694	122.88	96.584	102.36	86.476	102.84	77.741	77.573
152.34	129.42	136.34	102.92	99.519	127.19	122.34	152.12	114.56	121.99	118.92	92.58
147.51	172.39	156.6	156.64	140.13	152.58	184.26	161.27	134.67	222.09	168.91	112.97
195.56	261.02	250.73	212.26	213.68	214.31	217.75	254.86	224.71	242.63	198.82	143.13
159.97	207.54	213.7	220.16	203.77	182.85	220.99	201.71	189.18	212.15	187.23	130.26
86.949	114.67	102.39	168.52	155.75	79.816	115.4	97.598	84.709	136.27	128.5	72.503
75.791	135.86	119.97	115.23	111.29	116.31	124.29	138.47	130.28	128.53	134.78	100.33
120.84	126.16	141.7	162.07	165.53	119.39	118.56	122.62	107.97	115.74	147.21	65.385
148.74	140.93	185.09	181.89	181.37	147.94	124.14	122.62	112.05	156.78	145.76	77.764
224.32	211.17	194.54	199.35	203.86	176	209.36	218.51	216.1	259.93	192.49	149.4
178.12	140.09	119.14	107.09	105.26	110.31	163.4	202.93	142.96	153.13	112.58	107.77
92.227	99.18	93.552	107.28	108.94	86.518	99.83	104.9	88.942	122.64	84.416	144.55
88.765	159.82	149.9	151.18	152.34	140.82	128.52	173.63	140.35	166.05	92.096	139.02
120.63	114.59	132.52	143.35	153.43	112.87	109.11	106.39	96.578	126.97	99.041	121.08
83.814	148.51	110.1	119.62	106.19	98.563	133.51	140.81	116.5	180.93	115.33	95.371
82.609	96.509	97.465	87.034	89.031	80.53	112	114.66	84.738	91.515	128.66	73.572
100.79	78.232	92.651	92.311	95.406	76.686	81.544	94.53	91.936	67.446	100.09	59.987
108.69	85.498	86.254	72.537	82.345	75.093	75.943	130.71	93.432	93.213	105.75	60.461
46.331	51.508	55.825	48.562	46.201	44.89	38.912	67.557	54.452	43.218	58.529	41.7
54.685	29.843	31.838	39.102	41.521	21.715	34.519	35.096	30.39	39.795	41.141	23.473
113.47	66.474	63.178	55.217	60.443	51.729	56.075	61.114	43.87	53.686	67.17	44.372
60.918	63.12	58.871	69.843	64.102	80.93	50.47	54.684	46.872	40.727	47.98	44.372
55.044	50.871	59.774	54.191	61.281	52.2	48.733	56.098	42.487	35.014	70.106	35.774
40.357	56.396	64.131	53.671	52.656	53.51	72.777	58.477	51.641	38.673	71.014	36.427
51.168	39.194	50.358	49.257	56.969	40.889	31.46	31.071	36.209	32.115	58.076	18.458
35.142	50.918	29.879	31.238	31.393	26.953	62.556	52.054	54.097	78.197	39.22	51.251
57.037	70.179	53.063	53.196	54.633	48.825	91.028	71.235	68.184	89.046	84.146	64.014
107.79	98.912	80.109	94.51	87.272	68.306	99.937	101.71	89.128	149.7	84.146	74.697
69.978	68.855	74.801	72.485	72.797	59.07	68.678	82.782	69.694	88.074	56.443	41.141
42.729	63.72	71.34	79.97	91.052	59.07	59.122	62.688	59.538	57.922	63.958	42.244
59.81	70.75	69.426	54.642	56.716	62.312	72.808	77.783	70.787	78.256	63.503	53.556
63.737	66.491	50.913	60.087	57.416	58.648	72.808	77.783	55.191	89.412	63.503	55.162
109.76	152.65	163.21	196.08	194.49	139.83	152.46	182.37	151.59	119.41	148.96	112.16
53.962	37.051	44.648	56.59	56.08	54.729	39.419	40.992	52.841	29.598	56.417	29.62
102.53	91.53	105.81	95.576	94.443	84.012	78.457	77.613	71.267	79.117	62.889	58.026
67.767	113.14	91.479	113.21	105.14	82.111	114.55	68.746	71.267	86.234	110	60.165
110.82	147.74	108.15	123.89	96.91	113.27	153.69	152.38	184.59	212.64	92.532	115.51
61.12	79.652	70.481	80.553	91.917	63.585	92.087	56.836	81.952	85.581	81.533	56.692
52.944	71.063	73.818	65.036	62.548	63.585	59.915	63.667	78.385	85.581	77.748	58.056
54.409	36.876	40.441	32.362	34.963	36.033	42.608	64.174	46.278	44.432	43.679	38.219
68.379	72.794	64.319	82.707	87.108	68.125	87.152	57.86	91.878	76.008	96.893	44.835
135.86	162.87	175	173.31	164.94	152.49	177.47	151.03	154.9	174.5	161.58	107.05
111.45	127.74	122.1	121.94	134.63	99.659	131.85	140.43	107.75	114.6	114.58	84.857
66.026	88.522	82.752	78.519	68.007	70.88	86.283	97.083	79.942	96.182	98.97	61.619
62.798	88.522	86.19	82.823	68.007	83.07	110.37	84	82.826	127.97	100.46	71.674
51.638	62.801	60.064	82.916	72.655	56.077	51.681	77.832	71.865	81.43	63.746	51.622
136.06	67.726	77.967	88.254	87.912	62.844	60.551	92.816	71.865	84.061	94.639	109.88
118.47	123.07	122.76	128.05	140.09	110.39	145.96	121.31	146.94	136.41	118.99	92.208
180.57	134.63	144.13	152.02	170.6	126.46	102	122.2	131.36	117.55	105.22	67.864
114.33	92.436	110.01	88.591	93.344	95.398	76.955	121.42	131.76	70.295	87.723	66.346
81.143	124.2	110.01	88.591	82.481	95.398	122.26	139.01	127.5	127.74	95.489	110.28
67.392	124.2	113.05	133.31	118.21	102.81	93.976	129.28	113.52	131.94	75.007	94.791
71.069	112.94	102.01	103.57	97.167	87.052	107.16	110.29	118.82	114.43	107.23	61.532
112.16	94.38	102.01	93.876	97.167	87.052	78.01	80.334	93.523	65.808	107.23	269.86
112.16	84.478	94.374	88.198	104.84	81.566	85.959	102.57	76.234	78.829	109.94	66.519
124.17	56.958	50.478	40.168	47.136	48.406	68.126	55.638	73.045	66.147	56.815	46.723
102.96	90.689	85.76	70.484	88.29	74.506	78.156	101.81	92.365	76.037	96.246	49.762
69.316	99.296	70.33	67.375	59.789	60.959	124.29	74.827	157.03	133.9	85.493	74.053
52.484	88.085	63.431	60.585	59.789	59.357	97.358	63.293	110.4	129.21	85.493	61.689
37.595	43.376	38.574	31.428	31.137	38.946	52.309	33.357	36.627	40.027	52.268	39.691
34.097	43.376	38.574	31.428	31.137	38.946	52.309	33.357	42.328	40.027	52.268	39.691
36.021	35.071	34.465	32.13	31.34	34.113	40.055	29.545	42.82	32.419	38.56	32.379
38.985	35.071	29.79	30.274	29.381	25.73	40.055	30.77	38.898	44.766	30.152	33.734
38.985	51.243	39.192	44.289	34.032	34.998	57.928	53.539	48.92	63.929	49.195	44.667
70.928	111.43	72.054	65.752	71.08	69.223	142.5	94.692	124.41	164.93	98.993	103.23
116.82	129.38	105.31	106.56	93.621	92.773	128.69	135.28	138.24	123.91	126.34	89.339
112.7	98.071	86.1	82.144	82.266	75.238	108.03	122.34	263.95	124.78	74.895	90.153
85.647	102.1	108.2	118.4	122.52	98.563	127.86	102.84	94.595	118.59	113.27	90.153
92.43	53.314	63.605	79.202	82.537	52.902	48.616	59.002	50.412	48.387	67.748	37.692
72.248	77.377	66.945	77.318	71.28	56.603	73.616	92.563	75.202	78.146	85.066	114.06
48.598	42.247	41.076	32.854	38.078	40.111	54.012	54.445	52.478	42.103	48.576	61.836
46.993	119.62	105.7	123.46	132.67	85.489	122.97	77.388	87.948	123.54	131.42	82.007
65.723	65.097	74.151	70.714	68.342	63.789	68.406	73.088	68.379	90.664	76.02	108.05
75.687	63.173	52.2	45.769	41.937	47.56	75.758	92.257	80.481	76.558	78.593	47.465
71.967	83.305	95.653	79.162	74.443	89.646	75.705	100.03	129.34	70.671	66.368	53.492
34.737	46.894	39.79	34.581	44.176	29.521	55.6	50.527	79.728	98.908	46.098	43.855
49.943	45.675	39.79	34.581	42.737	29.521	55.6	50.339	39.525	51.054	53.888	37.009
34.615	34.056	34.726	37.538	40.824	31.415	35.826	21.254	22.42	34.554	42.352	19.258
39.162	21.529	19.819	20.995	28.01	16.19	28.846	21.254	24.08	31.189	38.177	17.441
19.984	21.529	12.777	20.79	17.32	20.655	24.834	17.917	22.589	28.143	23.831	20.666
12.953	17.144	7.5692	10.875	12.068	14.308	21.062	14.476	19.077	36.569	11.307	19.341
30.025	29.12	20.446	23.601	20.959	22.913	52.673	21.06	23.261	54.692	19.922	42.698
21.063	33.263	12.087	14.585	13.745	13.156	55.303	27.52	44.7	81.03	16.055	43.12
16.982	15.73	11.611	14.059	11.155	12.889	18.022	13.06	10.386	21.721	16.528	16.649
16.754	19.544	26.634	25.344	25.13	20.434	22.108	17.237	14.183	19.111	28.577	13.477
16.326	14.221	19.037	17.913	18.579	16.557	16.355	14.337	15.886	10.565	19.139	12.034
15.689	13.533	13.529	10.496	9.6594	16.557	11.25	12.943	80.216	12.042	14.786	12.074
9.4555	9.9152	10.024	10.149	10.275	10.405	12.815	12.635	10.752	11.399	14.19	8.8675
21.571	24.412	20.739	19.753	21.726	21.166	29.789	28.629	25.465	34.315	28.155	18.343
22.87	21.945	20.926	19.092	19.638	16.709	23.983	15.786	24.014	24.737	15.39	17.76
19.528	18.105	22.327	20.764	20.802	21.468	16.983	15.74	16.955	11.802	17.146	10.23
17.617	10.088	12.364	11.345	11.55	10.778	8.357	10.037	12.681	10.254	8.5356	7.3204
32.191	21.686	26.382	24.694	24.369	23.289	15.943	21.471	20.32	16.386	20.746	15.044
25.881	12.18	18.119	24.495	19.223	12.849	10.462	12.146	34.439	16.428	13.721	15.145
18.51	15.02	19.777	16.81	15.047	19.167	15.979	20.064	61.182	12.698	14.641	17.119
17.126	14.858	18.158	18.58	20.149	18.809	16.625	8.9233	22.154	11.743	12.265	9.7656
29.829	10.411	13.004	12.702	11.613	11.037	14.631	10.585	14.977	13.919	17.598	11.46
29.829	16.357	14.963	14.332	14.286	14.626	22.1	14.67	22.892	20.394	14.586	20.642
18.323	16.248	11.436	16.881	16.765	14.626	17.663	14.67	13.777	28.882	13.344	19.854
24.953	24.537	21.943	23.215	23.674	19.032	35.094	21.164	29	31.419	24.682	22.136
31.481	20.605	20.15	16.41	18.772	17.747	35.094	21.106	29	28.292	20.22	29.87
28.196	37.169	34.661	32.808	36.722	26.782	55.899	24.434	30.249	56.15	39.414	40.69
27.901	34.39	28.2	33.706	32.843	22.538	44.044	24.341	26.454	49.367	41.06	27.689
24.653	17.137	14.468	16.685	17.247	15.637	12.026	16.773	12.932	18.239	20.505	15.184
22.043	17.703	18.983	20.245	24.774	18.313	20.234	15.505	11.866	16.072	25.373	42.859
20.563	18.795	17.508	21.941	23.478	15.196	16.312	15.92	14.94	22.378	13.128	13.232
18.296	22.117	17.474	23.062	22.848	15.8	18.011	14.261	33.19	22.378	22.472	17.496
32.234	27.759	34.153	34.129	33.95	30.389	29.268	15.723	30.057	15.152	47.38	29.043
30.532	23.571	30.628	33.713	35.796	25.262	20.792	15.125	16.64	19.616	20.775	18.868
13.537	16.451	17.596	17.266	17.326	18.171	19.831	10.873	16.306	17.577	15.348	16.141
29.159	16.616	20.407	24.129	18.206	18.171	16.614	13.385	22.963	13.314	44.903	16.141
30.995	34.209	44.126	51.977	39.495	54.622	25.952	30.082	19.763	22.388	63.507	22.454
37.859	55.858	61.361	75.234	66.682	75.975	36.362	46.594	61.939	30.512	42.139	54.783
34.613	57.797	64.579	51.411	54.22	57.199	37.229	48.861	135.68	19.821	87.304	46.739
33.452	28.59	36.891	43.238	39.816	28.811	22.547	31.971	33.899	28.084	38.838	17.597
31.288	34.537	41.151	41.52	37.721	49.954	20.763	29.238	26.136	19.933	47.342	17.799
37.666	38.501	43.76	52.848	46.165	50.802	27.282	32.112	31.343	27.354	46.049	30.644
27.647	25.185	24.733	25.97	21.684	24.999	15.4	25.545	26.218	16.142	32.565	30.644
20.35	22.713	24.045	29.227	26.053	20.712	19.252	17.707	22.232	16.731	22.277	10.758
41.048	29.36	35.725	41.57	32.736	45.201	25.451	26.214	21.134	22.377	28.349	22.337
38.252	39.008	43.429	46.076	37.496	45.201	30.331	38.517	26.215	19.204	45.955	29.996
71.165	41.736	44.66	46.675	49.376	50.402	36.344	36.339	25.791	31.013	57.238	41.705
39.458	46.333	50.176	35.475	36.444	50.402	43.698	47.66	32.8	24.685	86.625	34.448
20.183	27.621	36.651	38.695	40.009	37.345	14.705	17.418	24.529	23.691	24.003	25.169
22.225	19.328	28.847	30.441	17.642	26.914	20.119	21.261	14.531	12.439	24.505	20.409
29.597	25.973	32.94	31.009	25.754	34.523	25.293	24.621	22.93	17.582	27.757	38.52
36.11	35.722	41.949	30.407	27.544	31.542	34.581	34.87	30.533	13.531	35.242	42.95
40.705	34.274	49.262	34.084	28.637	37.531	24.452	29.291	33.441	19.823	25.529	27.612
27.468	20.024	26.587	24.775	22.445	26.832	18.268	20.663	21.192	12.402	25.529	24.041
41.736	42.901	52.037	54.645	46.518	61.722	27.683	35.659	33.079	28.534	29.761	23.141
23.124	29.722	40.087	35.195	33.255	33.378	27.683	32.471	23.773	20.003	30.294	41.491
20.039	31.213	32.895	35.195	33.255	23.715	24.473	24.334	30.442	21.066	29.3	45.348
28.416	32.902	28.138	37.903	31.703	22.793	39.027	18.474	30.442	35.073	29.3	88.386
24.764	20.085	20.627	18.024	13.179	36.924	24.553	21.457	13.14	8.4998	22.34	40.025
23.453	26.466	29.271	29.286	28.725	27.309	24.391	22.362	38.349	15.271	30.46	47.517
18.063	13.208	18.365	19.641	18.471	25.407	13.656	13.581	13.531	9.9243	17.379	25.342
23.71	32.278	26.267	26.536	24.347	41.528	20.766	25.633	22.946	14.948	22.841	93.029
29.977	33.37	37.891	52.277	45.247	39.546	38.108	29.708	22.946	30.089	28.827	58.691
23.983	16.227	16.346	19.644	17.143	15.525	16.125	17.443	13.315	13.366	20.915	34.072
23.822	26.44	26.762	33.014	31.666	30.624	17.815	20.455	29.401	19.245	20.915	42.593
30.527	39.851	41.766	45.535	41.536	49.411	29.595	39.23	29.401	30.158	34.989	44.297
23.518	34.837	44.966	44.085	41.536	38.754	22.998	31.167	31.235	25.023	45.912	43.498
28.638	22.823	29.153	36.103	32.971	35.081	21.752	18.142	27.426	24.482	26.05	21.548
30.303	26.167	31.925	36.269	33.018	34.239	22.013	21.739	19.927	19.906	18.641	22.64
33.684	25.965	30.948	32.628	24.559	37.518	24.717	29.482	30.32	19.906	28.487	22.596
33.019	24.162	25.835	41.324	23.163	26.179	15.909	21.124	21.773	20.942	21.313	22.266
36.847	34.375	31.952	42.135	34.014	35.186	26.003	22.791	26.854	20.269	45.055	39.777
36.847	34.375	44.83	39.594	34.737	48.187	26.994	30.464	34.205	20.669	49.967	55.737
31.644	29.156	44.83	39.594	38.41	48.187	26.994	27.726	23.988	12.897	51.512	38.409
17.661	15.527	19.557	18.575	17.813	23.611	15.382	19.175	14.119	10.508	27.462	44.929
41.433	27.675	35.305	29.61	30.051	42.097	21.038	25.055	23.656	11.278	23.453	59.721
40.38	28.596	43.402	30.42	37.582	42.097	21.038	25.055	29.654	12.563	21.362	59.721
31.656	25.362	33.198	29.556	29.075	41.281	16.963	24.417	18.568	17.839	39.575	24.66
23.039	22.843	30.621	27.306	24.863	30.224	18.779	24.187	22.048	14.009	30.572	20.381
32.473	24.435	35.356	32.988	33.797	36.27	20.898	28.382	26.889	18.536	27.244	20.381
44.831	47.76	64.425	43.268	46.607	46.307	40.862	50.325	44.245	17.306	43.673	32.328
37.26	120.39	57.853	76.477	85.947	92.741	51.553	53.264	175.48	60.162	97.412	135.37
31.831	37.243	48.854	34.819	42.643	63.356	32.215	37.426	36.676	19.499	51.416	33.543
19.532	24.89	31.126	17.553	23.915	28.176	21.9	24.502	26.888	19.499	27.9	41.453
22.688	28.263	31.816	21.218	25.059	27.383	20.25	22.437	29.713	19.996	29.077	38.631
25.13	41.679	31.816	41.245	40.549	27.383	26.104	22.437	35.599	30.68	33.927	49.001
25.13	34.429	30.939	46.009	30.603	39.677	19.427	29.821	35.599	29.396	37.715	54.658
24.744	22.713	23.438	31.75	18.238	27.883	16.464	25.469	28.147	19.478	22.903	23.033
24.744	35.67	39.434	38.746	36.424	39.274	28.157	31.953	49.733	25.687	31.129	35.32
30.024	24.058	28.794	35.042	32.615	35.714	18.804	23.664	37.001	19.89	19.072	16.261
23.963	34.506	58.352	36.351	36.787	44.237	29.726	27.767	32.879	19.89	41.64	25.887
24.526	26.588	31.219	34.915	32.139	31.803	16.583	26.681	22.359	23.835	22.66	19.058
32.595	31.493	34.637	45.648	33.499	37.298	22.959	34.677	22.483	32.446	35.614	28.268
22.26	21.471	20.497	26.904	22.138	18.797	21.566	23.073	26.359	20.879	22.012	32.26
30.513	36.02	28.222	43.122	37.897	37.618	22.232	33.109	33.565	29.859	19.312	27.725
26.611	25.583	26.597	39.286	36.521	32.812	18.148	23.023	20.36	27.638	25.74	17.399
16.498	15.455	20.599	25.557	25.164	24.621	13.43	15.723	18.987	15.801	16.541	23.628
32.433	32.532	31.2	34.538	33.788	108.22	22.519	27.846	25.894	23.835	30.659	26.349
34.214	25.644	34.296	34.898	31.207	54.262	21.143	22.171	43.428	19.305	26.499	26.349
66.744	58.879	66.385	73.222	74.7	56.752	43.485	50.118	47.812	36.832	50.52	40.273
37.999	35.507	37.275	38.731	37.862	32.751	24.951	30.044	51.893	33.819	38.463	33.538
37.999	26.891	33.121	27.673	28.548	32.751	33.874	23.652	23.153	12.812	38.463	15.318
44.09	50.897	59.821	61.584	72.605	52.099	39.166	47.819	47.723	44.261	53.633	53.345
50.573	44.925	53.853	61.584	57.656	45.887	32.86	45.019	37.79	27.512	46.031	30.708
43.329	52.992	65.891	76.985	83.368	58.624	38.749	45.019	38.194	37.816	61.968	31.383
55.093	52.093	53.978	47.368	63.223	48.253	50.289	44.529	56.38	30.487	67.51	38.291
65.237	59.808	73.353	65.006	70.099	52.874	66.601	55.358	49.315	45.164	74.565	41.451
63.87	51.153	48.618	48.202	42.63	43.548	42.198	55.358	45.506	35.585	52.755	34.411
63.87	36.324	43.048	34.95	27.875	43.548	28.036	49.687	40.856	27.143	35.978	26.933
78.396	60.455	76.807	79.812	73.161	75.806	50.969	69.309	50.018	40.273	54.943	33.091
52.822	46.438	46.889	56.891	67.037	37.597	51.415	59.234	40.282	50.324	58.95	35.357
84.913	88.557	87.94	113.27	109.38	75.259	82.897	62.519	55.552	71.539	82.065	51.492
85.082	57.481	71.355	69.287	86.125	69.353	47.159	49.068	40.066	33.405	80.467	36.848
43.901	34.177	35.143	35.785	33.488	49.135	41.548	38.468	45.267	40.398	39.435	31.316
92.58	85.587	103.41	72.173	81.166	129.62	91.799	82.004	68.662	71.87	117.08	55.737
91.425	112.81	113.77	131.81	156.45	125.35	91.799	109.58	85.098	80.022	194.73	55.737
57.254	66.682	93.213	107.65	107.09	89.049	48.781	37.342	47.774	52.704	48.49	39.879
33.559	36.755	46.155	50.143	53.704	48.297	43.781	35.858	35.505	33.818	40.084	27.407
97.425	98.123	92.238	75.974	75	81.011	105.58	80.344	87.888	126.87	72.658	65.356
92.862	98.123	95.817	97.826	103.81	83.224	91.694	101.31	94.451	84.925	81.07	56.531
80.746	76.189	84.397	90.321	89.683	73.967	78.295	82.477	87.417	70.285	68.914	79.952
110.44	113.7	96.102	105.17	108.2	129.67	111.16	94.63	93.209	133.88	107.43	80.583
106.26	156.21	128.38	152.64	140.25	121.1	154.26	147.21	128.08	171.48	139.81	133.01
68.271	86.881	103.08	69.492	82.392	92.276	101.86	107.52	110.25	72.938	127.47	63.611
38.646	56.015	61.803	72.071	71.123	52.671	49.789	55.543	54.765	51.479	53.833	45.273
94.473	133.73	120.26	160.05	176.59	102.04	118.49	106.57	101.69	106.48	129.26	116.81
150.09	118.99	112.56	90.036	116.11	90.286	130.84	126.01	111.46	114.24	131.41	105.52
99.694	118.99	119.41	140.02	138.93	102.75	130.84	115.47	111.46	114.24	119.89	97.576
97.374	69.538	73.524	75.295	77.942	59.035	75.423	89.048	62.373	78.272	58.442	117.33
96.786	113.42	92.365	97.187	91.657	88.145	106.96	89.048	96.851	167.38	93.695	71.615
71.91	97.586	116.02	99.178	104.84	98.25	104.86	95.674	103.36	125.79	104.62	64.607
93.828	81.531	72.97	72.651	79.079	99.623	95.264	108.43	96.575	87.066	106.04	63.848
121.02	90.07	105.08	95.47	99.07	93.591	113.97	76.056	77.978	75.149	115.3	60.436
121.02	134.78	110.21	125.26	126.48	134.65	153.64	111.04	118.3	160.16	132.49	115.86
147.85	211.93	172.12	187.1	195.18	151.94	221.63	214.07	196.16	216.09	189.73	242.2
124.17	117.94	138.98	143.44	149.53	108.25	142.77	128.97	139.65	150.53	145.29	97.083
102.25	114.61	106.95	139	167.03	101.05	142.77	113.52	115.39	141.6	145.29	92.544
79.805	101.02	108.45	153.41	167.03	105.7	96.39	89.197	92.968	144.86	96.715	71.846
63.228	79.192	56.23	90.148	83.201	61.999	96.39	90.472	90.938	120.29	71.315	85.659
120.36	75.016	82.738	74.367	71.926	74.263	78.85	101.95	85.092	90.036	71.315	67.121
76.49	88.597	87.714	78.524	87.772	74.263	104.53	101.43	74.891	63.087	144.01	58.886
166.88	155.54	154.35	135.23	151.99	150.58	171.57	150.93	141.68	167.36	158.04	114.61
87.565	110.26	104.23	131.67	135.69	81.74	113.19	98.299	88.354	118.19	93.604	98.626
87.594	89.646	84.935	118.63	116.63	75.996	113.02	104.87	98.211	107.49	77.568	75.641
105.78	76.717	71.39	67.647	79.551	73.975	95.143	113.59	98.211	80.396	77.568	75.641
132	130.77	129.64	124.66	128.78	123.69	119.46	123.08	132.71	168.6	95.834	107.11
86.437	174.23	129.64	150.52	119.43	118.74	165.23	193.39	156.87	172.9	123.35	115.63
97.181	96.245	85.928	84.722	89.972	88.177	121.7	111.28	95.338	99.889	99.893	73.944
112.77	116.88	145.37	156.17	162.41	124.66	117.5	107.87	100.12	121.41	127.14	81.33
147.66	123.01	121.56	115.77	115.75	108.9	122.05	130	114.62	138.53	128.64	82.279
121.18	123.9	113.42	102.31	97.238	100.06	151.22	134.54	114.62	211.77	128.64	83.911
111.46	129.7	135.05	148.25	169.83	98.341	140.39	118.81	96.686	127.52	122.79	98.732
193.12	247.5	241.18	204.93	233.8	206.8	240.7	258.5	230.58	214.57	189.16	146.85
126.5	97.622	110.29	98.707	99.178	115.13	107.32	96.88	82.767	97.195	123.52	75.83
162.33	139.36	156.01	138.49	148.1	137.72	128.53	156.58	118	125.74	156.96	99.221
118.99	124.3	117.4	111.49	103.79	96.274	128.53	148.63	106.24	90.718	138.35	70.239
80.58	67.876	82.187	94.56	101.27	109.4	76.073	78.738	68.652	90.329	77.564	50.933
158.43	132.52	145.17	120.75	111.9	117.46	135.87	138.66	123.77	94.034	128.3	78.233
140.38	60.498	59.951	82.503	90.622	51.037	78.063	89.371	86.31	78.01	59.181	54.594
96.294	85.79	73.349	84.219	75.399	71.796	106.86	88.162	83.945	76.741	114.31	100.61
112.27	119.74	102.64	84.219	75.399	118.17	153.3	127.85	100.71	129.06	126.31	103.05
81.591	75.78	93.19	67.737	80.632	99.033	69.017	88.375	70.334	78.861	71.624	41.285
127.54	233.8	202.16	196.67	202.92	166.59	260.46	165.07	178.35	249.32	260.43	162.77
152.39	139.17	126.8	140.82	155.27	107.47	163.95	150.41	144.21	207.08	133.42	110.56
216.41	198.62	191.23	155.47	161.83	168.4	211.04	256.92	212.66	207.08	220.34	148.57
115.48	106.63	95.015	105.99	105.07	67.563	122.95	109.47	88.629	107.19	95.58	93.571
103.2	110.56	94.727	79.181	79.069	85.092	115.8	130.72	109.05	122.24	110.33	88.632
122.1	132.55	137.21	101.31	103.77	120.68	123.77	168.19	123.94	118.75	145.76	94.653
137.51	168.64	134.07	133.19	124.77	114.57	196.69	198.76	169.56	193.15	174.78	112.53
151	172.79	173.9	179.8	200.58	144.22	155.85	210.93	164.69	134.31	187.72	105.82
160.17	188.25	171.69	144.89	139.8	144.22	191.67	212.87	175.25	167.86	187.72	118.16
126.78	128.97	125.33	138.97	121.63	107.13	142.83	133.32	126.17	197.88	128.7	96.089
177.93	200.33	231.77	179.31	207.47	194.94	184.65	226.81	176.85	171.74	225.05	121.85
110.8	121.22	105.76	130.48	132.16	88.817	133.29	151.79	126.87	137.4	125.45	137.98
74.915	74.684	76.922	69.05	71.725	62.471	78.042	81.482	86.866	58.179	104.13	123.37
83.827	66.462	63.635	66.855	64.896	47.46	96.855	72.762	86.866	99.994	74.072	77.685
114.7	190.39	163.41	160.36	166.43	150.6	179	184.7	167.92	241.92	152.66	125.66
172.02	180.16	154.42	141.28	147.74	139.54	191.51	157.13	167.92	249.39	152.59	125.66
262.08	248.47	199.61	182.55	163.05	185.35	247	312.15	240.09	303.56	199.51	183.18
131.9	191.77	211.83	201.49	227.45	152.16	183.35	175.31	151.12	167.36	170.62	136.22
164.66	174.41	202.38	201.49	228.55	153.2	184.22	164.55	151.12	138.71	224.01	131.62
136.12	234.8	191.44	234.55	261.88	161.46	222.82	188.65	171.17	243.43	228.66	133.75
223.72	158.78	184.91	222	249.82	162.14	150.45	164.82	140.03	182.3	142.41	89.29
122.86	119.28	84.529	63.433	66.322	79.311	151.62	187.83	154.6	167.48	119.55	106.85
100.14	137.13	134.57	129.98	116.9	131.77	132.96	162.02	174.77	134.94	140.88	91.976
102.23	140.32	141.46	159.39	164.36	134.57	126.11	137.47	133.81	109.77	152.21	94.258
149.62	166.25	199.91	174.76	185.34	168.21	152.04	155.58	123.24	145.41	159.03	105.11
110.32	98.718	164.22	130.71	136.28	132.91	67.995	73.911	51.853	72.753	132.48	62.946
136.54	156.47	173.09	142.42	166.15	171.62	143.48	182.67	156.4	161.04	133.44	105.3
138.36	101.37	108.27	93.017	98.553	102.31	113.68	135.02	104.26	77.778	133.44	80.522
144.31	174.67	188.97	156.11	147.02	165.78	179.23	182.22	152.45	160.67	173.74	161.25
149.69	254.91	236.52	218.05	232.21	214.35	245.43	234.9	197.39	200.09	312.85	156.22
131.96	231.74	196.47	218.05	232.21	170.26	220.49	210.68	194.58	239.76	243.46	131.45
62.567	66.1	51.857	50.239	45.71	85.287	80.621	64.836	62.747	83.828	83.815	59.413
53.826	48.605	50.786	53.471	48.575	153.49	53.214	50.89	46.657	52.556	48.481	34.844
88.877	72.159	71.423	64.879	69.447	65.005	95.498	68.837	61.771	81.131	78.447	77.603
116.66	133.68	109.3	96.001	76.855	103.26	155.78	165.8	168	171.76	99.249	97.076
116.66	155.87	132.54	139.38	144.53	106.4	163.51	159.28	168	165.33	156.21	125.59
103.89	104.94	107.8	107.77	102.62	99.587	94.93	138.93	173.41	117.96	103.78	59.299
168.42	84.732	77.209	62.682	65.265	61.971	94.93	137.89	105.72	101.75	98.649	59.299
125.65	155.49	178.72	168.05	174.62	154.46	135.51	155.03	148.14	140.96	155.86	87.004
126.27	65.669	55.803	46.226	42.889	60.714	64.851	103.35	70.441	70.149	68.365	46.107
119.38	102.61	113.5	114.5	109.81	99.108	122.53	78.927	91.412	127.43	96.148	85.87
129.47	115.27	119.13	133.39	130.96	108.4	137.61	169.17	122.28	108.53	146.58	101.24
142.22	181.87	183.22	219	228.7	157.55	170.67	174.25	136.21	192.58	176.13	120.53
128.93	211.31	169.18	194.55	179.61	164.78	206.72	181.01	176.97	228.94	179.71	140.59
105.08	132.59	137.59	189.23	182.67	129.64	123.54	134.22	119.78	149.22	133.83	65.721
176.24	106.77	133.63	121.83	128.51	111.33	114.57	135.93	109.22	104.96	107.18	80.752
137.68	195.06	198.59	175.86	171.23	159.59	200.6	204.52	244.32	176.62	177.85	129.66
85.826	136.78	102.35	97.333	112.11	93.272	154.42	157.32	134.37	188.1	127.81	101.51
110.2	135.05	102.35	119.99	129.7	91.067	138.2	135.9	114.6	162.99	111.22	97.197
163.5	135.05	129.63	120.69	129.7	91.067	151.73	135.9	113.43	146.72	131.89	108.85
72.712	116.33	97.559	114.98	118.88	96.126	103.14	104.46	99.607	149.22	96.161	90.336
69.884	104.9	89.637	82.25	92.678	87.498	89.913	99.64	89.851	99.772	67.386	60.627
107.22	105.68	105.74	107.31	122.27	100.72	107.41	101.61	92.572	96.295	113.29	66.242
93.95	125.86	120.08	116.47	117.33	98.201	122.03	108.03	105.46	107.22	109.54	94.394
98.982	110.67	120.08	146.84	147.33	91.29	104.77	108.03	86.527	107.22	137.42	69.818
60.061	71.152	67.342	70.966	61.847	63.128	70.269	91.642	74.411	90.316	70.513	54.213
86.314	95.89	109.61	96.121	100.47	101.34	68.852	77.642	75.017	70.08	86.43	47.368
122.16	118.41	124.45	104.85	101.96	107.64	127.21	135.6	113.05	106.51	123.1	74.013
98.447	76.935	72.953	82.542	86.824	59.496	94.225	83.328	61.204	94.697	93.127	69.188
137.17	139.29	136.56	110.15	126.79	121.78	144.78	125.98	123.32	129.98	146.76	95.763
180.2	168.55	194.2	167.74	168.23	172.12	173.58	219.46	173.67	150.62	154.71	108.85
249.13	209.17	246.97	226.66	250.26	230.08	173.58	165.83	165.52	184.69	183.2	108.85
70.062	89.896	92.387	101.42	123.57	73.312	74.091	84.121	80.557	100.91	99.721	73.47
81.773	149.49	149	160.4	172.32	142.34	140.72	117.17	165.69	178.65	121.34	110.04
143.26	174.99	188.62	158.43	182.11	149.63	168.99	179.74	163.27	201.6	154.53	96.551
133.54	87.355	84.008	92.743	105.14	68.697	124.77	119.51	98.288	155.87	123.1	71.2
130.3	199.71	202.37	133.56	144.25	184.24	174.69	161.95	172.62	183.61	180.08	113.45
135.41	138.83	154.85	119.81	121.39	155.6	118.04	143.05	134.96	126.49	129.47	76.009
96.508	46.884	46.321	73.7	68.542	61.314	62.357	71.935	62.999	67.276	52.57	42.325
56.544	75.65	63.307	57.85	63.375	67.459	78.453	75.942	65.49	89.875	90.593	54.229
126.55	110.33	115.26	92.398	91.909	111.91	103.16	113.25	97.237	125.73	114.12	92.602
78.703	88.821	101.84	86.992	78.143	122.31	72.929	106.42	81.311	69.258	93.814	70.462
122.47	143.6	162.54	176.98	163.42	153.07	119.51	137.96	118.88	148.46	93.814	90.269
86.678	77.623	70.789	70.505	72.41	69.477	77.033	84.466	79.03	71.479	83.404	64.03
83.396	118.03	122.59	122.5	118.42	114.84	159.95	130.81	124.37	111.6	134.38	96.767
82.892	64.902	86.988	115.66	118.42	70.013	49.585	70.506	59.179	60.132	52.913	38.525
52.603	43.398	44.55	35.791	31.848	39.683	41.946	58.895	46.808	59.608	45.287	36.649
36.602	52.536	38.192	42.98	60.899	43.691	57.806	73.277	58.26	65.337	67.392	46.967
37.182	23.924	20.599	24.525	16.94	22.877	36.815	26.487	32.125	48.036	17.265	27.499
55.012	39.384	28.993	27.9	29.882	24.361	48.015	41.37	40.319	63.548	34.629	37.232
50.795	30.363	33.018	27.706	45.756	26.822	41.642	41.245	37.733	52.965	37.798	36.215
56.127	30.363	33.018	33.142	45.756	26.822	41.155	24.905	24.93	41.429	50.951	36.215
36.606	39.28	22.829	38.108	26.038	22.571	65.499	25.468	49.112	48.092	29.61	39.014
23.219	24.18	24.824	37.195	27.671	21.751	25.536	26.336	35.244	22.195	28.538	32.202
39.521	49.668	37.458	40.346	42.151	33.124	65.669	41.379	42.131	61.308	46.153	46.487
42.318	30.633	30.944	28.318	32.185	25.115	35.086	29.822	35.281	42.676	25.408	31.696
19.404	18.973	22.814	24.352	23.252	19.227	23.034	18.058	20.38	16.678	22.853	20.281
29.425	30.703	23.064	20.867	20.652	21.039	42.982	31.434	24.544	43.869	26.423	34.897
29.776	25.964	13.953	28.238	23.115	17.982	30.468	24	24.544	43.869	19.287	20.056
31.666	18.164	24.539	21.393	21.076	24.577	24.008	23.991	24.954	23.257	22.87	15.27
24.252	17.177	23.75	21.492	20.728	20.549	16.482	19.507	25.896	14.681	15.825	13.152
18.873	13.713	18.391	18.627	18.643	15.456	13.649	16.209	19.13	7.0477	16.622	13.152
22.232	17.433	26.228	16.422	19.185	24.879	25.949	20.262	24.212	13.84	26.151	13.195
33.163	83.208	55.428	53.756	43.757	50.355	91.388	76.282	83.838	106.01	69.42	70.799
57.329	86.809	68.423	56.946	54.57	59.222	111.58	84.435	106.56	112.71	104.25	79.894
85.346	145.18	129.53	124.89	123.5	117.5	124.01	117.55	137.63	153.33	120.08	89.59
44.853	51.873	42.262	40.339	34.02	41.167	59.108	68.135	69.518	75.924	51.959	39.11
48.668	70.299	61.35	61.169	62.099	54.685	75.157	81.518	82.318	86.807	76.387	45.943
69.147	96.437	89.846	96.253	117.32	69.76	88.034	73.737	76.628	88.047	100.65	62.268
90.376	204.88	175.76	175.82	178.09	153.02	185.17	153.78	160.34	203.36	191.42	129.71
45.699	62.565	59.225	44.335	50.303	55.177	80.052	77.646	64.299	45.734	75.304	47.117
84.981	62.565	66.997	54.377	63.409	60.621	80.052	79.843	64.299	51.736	76.955	60.576
91.276	123.02	105.13	87.877	94.276	91.261	132.53	115.58	115.63	123.51	123.81	82.593
86.99	60.96	69.783	98.093	71.099	57.857	68.401	75.705	78.828	99.26	82.526	47.674
63.95	42.159	47.114	73.204	59.84	38.69	35.861	48.575	31.289	42.915	56.249	26.604
58.402	57.655	66.415	68.895	65.064	61.972	52.496	68.649	63.242	49.225	66.3	37.371
69.042	83.428	71.515	84.626	80.262	63.216	82.625	61.034	69.247	97.383	65.796	47.277
114.36	108.76	100.91	93.776	90.962	95.134	101.19	127.44	92.169	84.659	116.04	65.85
48.162	76.873	58.644	47.768	56.814	49.854	108.91	75.789	86.171	104.5	69.235	67.065
104.8	81.157	137.02	162.92	192.68	98.683	93.399	64.617	73.95	81.953	98.278	61.321
166.94	199.72	220.29	171.95	189.51	178.44	164.2	135.84	161.94	149.06	155.57	99.998
153.43	159.21	152.16	122.6	141.39	134.96	138.85	205.69	160.33	143.45	176.71	104.55
86.357	132.29	119.69	150.18	152.29	103.65	124.92	110.36	101.28	131.1	125.16	72.645
84.754	104.02	89.652	124.35	142.55	75.722	126.04	110.36	101.28	112.39	112.38	73.81
106.88	117.23	123.82	184.68	201.01	105.12	123.79	106.42	83.892	64.636	175.3	62.246
148.13	125.34	167.19	164.41	183.03	141.79	95.382	105.08	87.935	71.842	118.69	71.431
114.62	89.162	112.85	129.18	140.64	83.499	83.409	79.643	70.99	62.244	97.869	64.411
106.82	89.79	108.74	121.48	110.55	78.928	94.62	90.087	74.882	71.018	84.26	51.094
156.7	117.3	108.74	101.69	91.221	117.09	95.015	141.32	101.22	75.082	84.26	67.248
80.178	57.379	56.827	54.34	50.813	61.157	50.598	77.894	80.408	61.9	48.118	40.352
69.973	58.15	51.689	59.401	50.813	61.868	59.046	68.138	65.648	87.863	49.043	41.65
101.59	71.306	84.446	117.14	113.44	87.324	59.046	70.528	63.905	71.925	73.961	42.002
116.27	84.641	83.808	117.14	113.44	62.413	83.801	61.626	57.323	66.29	118.13	52.621
133.12	133.11	123.54	149.07	153.6	106.45	126.41	113.05	110.63	135.1	118.13	84.889
172.4	130.37	133.41	117.82	122.47	119.21	134.01	121.83	118.03	122.39	129.65	85.622
168.08	130.37	144.83	159.53	172.57	111.63	116.45	114.95	111.37	100.28	126.62	82.087
125.78	156.82	172.65	178.48	181.86	147.08	130.47	115.63	125.69	161.07	178.89	100.57
158.19	89.84	96.394	78.416	77.914	96.771	90.399	115.63	86.991	72.764	100.15	60.138
113.91	78.929	75.524	77.719	63.183	73.834	98.272	84.939	73.684	67.509	89.848	60.138
95.743	48.316	69.675	97.959	68.711	82.473	38.26	64.07	44.144	51.721	55.948	33.119
95.743	80.997	82.935	82.241	77.934	74.557	65.699	97.021	81.328	69.516	78.911	48.726
154.38	146.64	125.32	90.544	94.808	105.02	165.33	147.09	124.57	175.69	159.62	104.78
156.83	145.66	136.72	159.17	137.94	133.93	124.52	130.78	116.85	76.223	169.28	98.856
156.83	149.48	158.81	154	137.94	138.13	175.83	170.41	146.69	156.01	191.71	98.083
167.27	193.84	186.86	233.32	194.07	176.28	176.13	204.5	166.51	196.33	185.93	116.46
155.38	196.93	186.86	217.61	187.12	168.75	175.31	152.4	169.72	204.7	185.93	105.89
221.84	145.47	151.15	176.57	186.18	137.31	122.68	147.98	220.75	191.16	135.82	77.389
124.09	136.95	145.35	162.07	178.94	125.78	116.25	127.12	114.15	129.02	109.91	77.389
68.637	129.32	149.51	170.14	179.03	142.1	111.03	91.341	89.75	98.936	122.33	64.35
77.785	66.31	67.861	77.076	82.636	71.367	63.63	82.498	70.032	93.349	52.768	55.193
49.768	36.102	43.94	45.073	47.359	45.299	37.356	43.329	62.621	34.987	45.998	32.794
120.37	68.263	73.695	97.166	101.59	53.73	86.386	67.397	63.637	85.894	80.58	55.383
89.871	89.275	75.265	76.423	91.02	64.391	114.77	90.248	83.967	130.44	71.734	76.925
98.349	131.04	133.43	115.97	104.31	114.47	114.77	136.05	126.65	122.24	129.31	71.563
89.321	107.58	81.587	115.97	104.31	78.426	134.88	79.715	128.65	169	100.48	72.054
149.05	168.25	179.47	195.04	196.06	154.77	151.11	191.95	143.04	195.92	112.21	110.5
164.6	159.9	151.53	161.62	163.6	137.57	176.41	176.17	143.04	159.88	158.19	109.27
89.651	128.88	172.33	190.06	207.14	191.39	93.817	101.7	104.45	68.297	129.73	64.778
101.21	61.679	98.031	91.843	89.7	91.009	55.729	85.071	85.72	54.474	73.128	38.49
80.879	80.79	98.031	93.582	89.21	81.374	85.194	82.412	83.308	101.48	82.101	60.619
71.647	81.607	70.516	84.448	70.24	84.546	88.297	91.602	99.867	136.7	103.86	73.704
107.13	96.401	115.72	105.97	103.69	96.626	86.698	136.23	92.318	64.271	105.74	66.843
124.49	101.61	120.08	78.589	75.136	116.92	112.62	124.67	92.878	89.538	117.68	82.329
109	101.61	99.167	82.869	81.508	89.685	100.7	101.03	83.724	89.538	129.14	78.531
75.486	68.781	73.025	87.248	85.956	65.575	66.991	81.733	63.723	54.609	80.987	55.671
70.264	68.781	76.931	106.38	96.907	65.355	74.348	82.816	72.618	54.609	80.987	58.29
102.49	96.185	69.919	71.465	66.914	68.266	106.38	91.08	79.237	96.299	99.002	58.29
119.33	80.594	88.884	93.439	94.21	116.88	73.393	116.85	79.178	96.299	99.002	52.765
151.48	112.82	114.19	93.439	95.563	111.44	235.51	155.78	117.46	141.18	126.05	95.295
208.05	214.52	214.25	209.74	203.87	181.68	199.22	196.35	199.74	197.8	173.95	135.86
196.11	214.52	214.25	224.34	215.32	181.68	194.28	196.35	188.72	206.82	160.63	135.86
226.2	179.75	253.43	212.04	213.89	195.47	157.21	199.16	168.74	120.55	176.32	117.33
68.316	115.78	66.89	70.711	79.244	70.135	120.96	159.45	126.95	182.47	97.092	92.913
118.88	106.42	113.72	85.146	104.42	96.007	108.09	109.59	102.32	90.948	132.24	72.767
56.918	68.154	61.921	63.875	63.461	51.756	68.754	77.712	62.963	89.921	66.101	49.269
81.763	79.985	90.29	91.015	85.466	97.831	70.2	90.26	90.85	68.942	65.661	48.389
133.19	103.32	108.41	82.853	86.826	92.03	108.32	129.47	97.468	104	106.06	66.315
97.761	116.96	108.41	100.09	108.93	92.03	133.87	125.09	97.468	123.72	115.01	92.836
141.94	194.01	221.53	176.32	197.42	207.23	191.09	166.26	152.44	198.04	176.73	120.12
126.09	126.64	179.5	207.48	235.98	135.64	137.5	121.48	93.999	106.58	151.42	77.074
140.63	104.68	151.12	123.35	147.82	116.14	94.491	134.06	109.57	49.769	143.1	75.459
160.92	131.1	156.11	143.14	158.02	139.8	138.84	145.49	157.99	90.189	150.39	87.509
84.863	77.089	115.29	135.95	158.02	90.465	58.668	88.933	113.8	42.085	69.279	41.4
73.43	115.09	93.26	91.313	89.088	91.155	136.31	139.2	118.44	139.59	122.96	95.102
76.255	102.26	113.67	122.57	117.76	138.33	87.73	106.73	110.35	119.73	95.501	65.133
161.68	117.69	138.06	138.44	144.62	208.79	106.65	161.13	148.32	131.24	99.887	76.52
166.11	94.556	112.81	98.232	91.549	107.94	88.404	136.23	135.64	78.274	73.305	55.207
110.45	95.826	107.86	92.778	102.71	156.69	102.2	112.67	98.527	112.07	90.86	75.502
97.715	103.26	114.63	99.663	99.107	98.891	91.152	99.2	98.527	93.749	94.589	60.909
103.55	104.87	106.53	77.12	68.594	105.34	91.602	120.2	98.444	89.344	87.624	69.564
78.504	84.818	77.445	73.211	72.314	79.055	91.461	76.191	61.938	80.477	104.75	57.694
53.695	50.828	31.404	31.299	30.339	51.011	69.211	44.977	52.815	79.463	40.964	54.296
36.353	17.102	24.76	28.581	20.142	20.595	22.782	13.113	20.561	16.89	35.349	15.141
36.353	33.98	40.772	38.505	45.063	34.992	29.564	31.794	27.361	37.028	41.983	16.354
31.496	19.588	25.832	21.131	20.262	22.075	19.777	21.59	16.552	10.322	25.156	14.051
43.617	43.081	42.984	39.29	39.049	34.662	41.38	39.328	44.151	25.406	60.592	27.814
21.124	19.453	21.182	31.399	26.595	20.156	17.559	14.744	11.445	12.82	24.447	13.391
32.124	13.581	16.708	17.961	13.966	17.663	19.145	14.777	13.59	11.893	18.286	12.104
32.534	14.841	16.78	17.782	15.876	18.404	29.563	14.895	19.897	11.322	11.93	14.586
29.655	18.896	19.314	16.287	17.193	17.837	18.272	16.576	15.556	16.559	21.7	17.844
29.459	20.172	19.517	15.09	14.18	19.936	27.756	16.576	25.734	24.502	26.221	23.612
19.809	15.569	12.056	13.609	10.39	12.962	18.918	13.205	49.525	18.142	17.866	15.767
30.143	12.628	12.286	13.609	11.352	11.714	17.99	11.416	20.39	16.294	14.838	16.523
23.595	12.204	19.301	14.953	14.74	14.823	11.21	13.61	19.748	9.2041	21.32	12.061
12.968	12.914	17.173	16.739	17.561	25.92	13.907	12.886	17.431	11.392	18.338	10.139
11.332	18.993	20.35	19.456	22.768	20.058	21.51	13.159	19.967	17.569	14.679	14.47
21.971	18.657	20.468	19.643	19.687	18.752	17.605	19.053	15.692	10.586	18.867	14.932
14.24	18.657	25.151	17.595	16.586	11.723	17.605	20.595	11.01	9.254	18.867	14.932
10.279	12.81	11.159	13.757	12.542	13.541	15.887	11.841	11.01	19.668	15.346	13.373
10.279	19.299	13.551	15.155	14.496	9.5239	21.236	16.817	88.985	19.981	17.316	14.498
51.998	57.449	65.199	49.2	50.623	55.017	67.575	58.944	57.692	55.993	51.85	40.446
21.347	13.078	17.753	14.907	15.477	12.397	19.371	10.823	74.053	10.421	16.342	13.431
31.326	22.852	24.173	19.529	15.609	23.151	18.272	28.164	37.524	13.708	25.562	17.73
24.446	19.149	27.213	22.132	20.44	28.185	23.517	25.909	22.867	11.398	24.628	14.007
47.282	39.637	48.848	61.92	42.642	48.031	33.475	41.409	31.359	24.36	41.145	32.179
42.89	59.368	54.293	59.22	56.113	48.403	60.537	44.834	45.27	39.85	87.873	43.976
33.174	79.972	52.239	64.588	52.321	44.129	87.776	64.166	84.478	120.17	57.06	62.166
62.037	99.793	78.668	73.956	81.689	77.896	110.1	90.612	100.47	114.65	95.613	64.202
71.611	81.404	76.888	73.292	77.181	78.545	68.894	96.722	81.238	101.43	71.675	47.904
65.954	67.44	69.78	48.094	46.484	75.827	81.158	96.722	79.776	71.954	67.887	57.073
63.199	59.779	48.835	55.825	48.833	43.35	75.955	82.486	70.635	72.578	67.887	45.624
45.523	59.779	67.48	82.144	94.676	49.937	86.504	60.15	54.139	89.232	48.005	59.792
57.839	94.332	98.615	93.846	93.564	79.135	71.331	98.904	85.771	97.206	71.392	57.317
55.816	62.299	76.611	74.938	76.188	63.66	48.353	38.015	29.614	43.048	71.392	32.722
69.897	76.893	75.11	98.093	104.13	60.558	63.02	61.379	62.302	74.127	77.302	57.901
71.368	54.791	71.201	73.245	75.29	67.979	47.649	54.572	41.228	33.608	57.868	35.089
84.426	60.175	67.013	54.957	60.715	66.393	59.596	54.572	59.181	62.07	57.868	36.642
79.726	163	152.86	159.82	188.79	124.02	139.38	105.61	117.51	150.79	203.53	79.865
85.282	171.18	150.86	195.62	193.14	132.69	167.47	101.15	113.1	150.79	199.95	85.52
69.987	84.882	63.835	77.198	65.216	51.977	88.688	63.476	103.08	92.131	67.1	57.502
27.964	27.055	57.842	25.73	26.924	49.636	25.289	31.074	23.078	15.003	45.226	19.002
17.412	12.566	17.176	20.519	19.162	19.874	14.448	11.334	15.583	14.876	15.293	19.002
27.513	20.043	26.249	33.545	31.301	34.273	17.333	19.792	16.555	17.487	15.64	17.717
22.008	16.094	24.307	32.514	25.263	25.301	16.147	14.643	19.492	14.203	13.311	13.566
15.927	14.066	20.971	16.832	20.181	26.336	14.477	19.983	19.492	13.316	17.955	12.702
20.892	22.416	28.902	35.033	28.081	26.336	17.247	16.053	33.952	15.142	31.182	18.031
23.107	26.399	45.442	42.382	38.308	31.195	25.649	25.153	43.177	19.718	37.922	16.893
16.491	14.24	31.523	29.568	30.006	18.875	14.141	23.195	22.311	12.132	20.073	14.698
54.527	39.805	46.272	52.422	44.169	40.409	35.946	38.224	32.467	20.892	35.634	32.443
64.681	53.967	61.951	63.404	61.129	48.684	52.136	25.641	42.762	20.892	68.6	32.443
59.978	106.76	99.098	85.663	87.417	83.843	117.4	75.158	89.943	108.3	121.31	75.322
59.978	64.147	58.98	48.209	52.416	51.549	67.227	58.807	161.97	65.927	49.355	45.284
53.758	64.147	58.03	52.916	46.137	83.367	67.227	96.178	67.512	68.485	88.27	58.782
91.525	95.287	99.493	74.852	61.954	91.175	106.19	105.53	90.314	82.36	101.69	65.969
91.2	53.151	67.58	54.692	58.934	74.92	46.05	74.163	48.296	40.567	59.821	40.393
68.488	44.043	41.745	33.788	34.159	40.358	46.05	53.917	48.296	32.698	50.472	43.601
110.54	109.07	118.48	113.64	126.84	101.35	105.97	92.148	91.097	115.42	94.186	86.013
86.971	126.53	116.43	87.562	76.546	104.21	153.26	130.28	127.74	145.71	153.76	93.328
72.077	89.631	79.363	80.54	76.546	67.825	111.4	91.294	96.434	118.62	79.409	73.383
122.62	115.34	90.132	75.346	66.817	93.122	126.16	141.76	132.44	136.89	84.679	90.839
138.1	98.49	93.309	104.28	107.41	82.441	104.96	81.808	78.619	82.926	106.34	88.162
83.773	112.61	127.66	143.39	155.6	118	105.5	87.057	90.652	78.692	115.1	67.779
83.773	77.19	96.085	92.446	107.68	81.386	78.8	76.542	77.603	65.678	128.33	40.58
97.424	173.21	146.45	140.53	150.53	130.89	180.39	130.33	140.24	178.22	143.17	100.11
93.089	91.306	120.83	104.71	104.38	99.826	85.597	115.62	79.35	72.38	119.68	47.173
106.14	105.4	111.63	87.327	91.308	101.19	85.362	88.206	80.075	94.671	126.25	52.516
76.475	78.279	66.411	68.985	56.924	61.567	83.735	88.658	75.177	100.05	100.91	54.199
95.271	92.348	96.84	97.822	98.402	103.93	84.472	86.882	92.08	97.803	106.1	64.721
63.013	75.18	72.751	95.894	87.438	75.168	99.558	100.53	111.22	118.38	77.568	75.464
132	95.817	125.38	169.37	169.5	101.31	104.29	108.51	86.255	105.22	125.79	66.106
115.77	93.626	95.195	69.563	66.988	93.38	99.347	108.51	97.219	71.246	99.52	79.46
82.294	106.3	109.36	110.53	113.61	93.38	123.01	102.51	102.6	98.138	104.35	79.46
75.576	45.941	46.825	45.035	47.279	52.255	36.04	43.553	42.745	32.275	42.597	32.097
128.26	112.22	122.68	111.67	112.38	104.78	114.97	125.39	109.49	93.463	122.81	74.757
172.6	137.6	131.46	146.87	152.79	177.74	121.67	142.48	130.93	93.463	124.16	105.87
69.551	111.64	120.01	77.277	83.627	109.12	88.683	73.954	79.286	87.918	100.39	69.338
66.289	59.554	68.666	59.024	64.4	56.406	72.08	74.202	62.68	82.694	70.088	48.689
114.5	117.82	107.32	111.92	110.06	101.66	131.39	116.02	102.24	142.96	125.73	83.96
45.694	95.691	74.446	84.124	80.379	65.739	108.94	85.577	85.466	98.709	64.314	62.197
60.218	97.221	100.94	115.29	123.55	78.669	87.522	85.577	70.746	98.709	88.714	54.04
86.845	69.289	58.12	52.419	52.552	64.197	69.075	91.126	73.443	58.83	64.705	57.774
89.225	93.986	77.325	94.132	81.176	80.663	114.06	103.26	101.33	118.84	84.467	69.951
97.316	104.33	102.65	89.002	80.811	107.89	117.87	114.03	103.31	129.41	102.37	83.76
114.01	117.01	138.71	62.847	71.851	122.43	119.19	117.98	118.72	137.38	135.83	95.562
92.305	50.108	64.232	41.848	45.284	59.481	63.086	75.724	44.392	41.574	53.465	46.763
93.894	68.859	85.524	99.683	94.006	81.083	68.276	69.297	52.677	64.552	94.907	51.402
114.65	164.7	152.47	144.64	147.62	134.51	160.36	144.3	250.16	164.2	129.6	106.5
105.61	168.96	153.01	145.17	142.98	133.35	145.12	161.69	298.85	174.84	142.17	112.04
94.226	142.77	118.86	103.59	121.48	109.91	122.97	161.69	176.74	150.28	142.17	99.682
94.226	93.765	101.51	103.59	121.48	86.77	67.145	95.778	190.43	62.765	96.075	64.436
124.57	84.052	89.946	77.576	96.56	70.952	99.881	92.059	149.86	90.577	95.246	88.516
117.03	81.793	93.973	108.98	118.91	77.332	76.675	66.397	97.724	56.76	109.61	41.118
96.218	90.683	115.31	88.829	92.259	113.08	79.071	97.693	67.33	69.204	82.692	67.257
75.13	52.479	57.541	65.469	66.449	46.056	51.917	58.687	47.403	56.703	87.722	36.192
63.81	64.036	57.727	43.831	47.855	48.105	75.76	79.489	75.222	102.24	85.474	54.649
175.44	117.1	147.86	166.92	178.94	123.74	104.97	86.832	85.753	116.36	96.031	72.115
76.229	59.814	63.069	85.723	79.853	44.458	54.713	49.295	40.693	44.08	67.631	36.985
72.672	92.302	94.544	119.57	124.67	78.616	86.624	79.825	58.539	73.188	103.6	60.757
72.672	78.169	63.432	79.584	59.534	70.01	92.419	70.093	75.332	94.119	75.743	61.372
90.676	106.68	87.959	96.372	87.847	73.13	139.54	106.54	111.33	146.84	101.07	74.108
80.148	47.476	79.561	62.78	55.991	62.388	51.565	58.973	42.916	36.827	78.419	31.334
95.473	71.18	93.622	62.78	65.121	87.553	71.477	89.482	66.304	40.333	91.219	75.789
84.503	96.222	84.061	102.43	101.49	72.972	112.54	105.53	97.294	121.89	81.903	66.039
68.812	96.088	81.974	94.328	89.419	76.495	97.718	87.413	86.629	89.626	79.095	66.039
117.26	117.45	104.17	112.93	109.52	156.52	126.23	98.681	89.997	100.28	120.74	101.39
85.166	95.145	117	93.791	84.847	156.47	78.961	136.07	98.962	61.393	90.7	64.714
53.381	64.272	64.657	60.452	72.942	60.37	72.032	87.054	53.927	49.482	87.921	47.512
149.73	81.866	129.12	65.884	83.594	109.41	95.255	121.8	67.128	56.51	162.16	58.388
92.845	88.407	100.78	110.23	116.37	87.668	83.295	86.273	69.079	53.488	81.372	58.388
88.634	107.08	100.78	110.23	125	88.891	126.48	108.57	103.1	150.2	114.39	73.548
97.29	130.43	139.26	120.03	119.56	112.78	122.86	115.56	114.45	90.068	140.54	73.548
97.29	127.31	132.32	96.471	107	105.73	122.86	137.04	115.33	103.42	150.58	95.028
92.691	90.053	87.544	96.989	101.97	87.932	86.128	77.392	76.938	67.624	100.74	59.361
76.515	72.448	99.07	74.997	80.529	82.388	68.954	63.732	57.704	59.362	78.821	53.095
52.012	66.73	69.875	65.914	59.728	63.844	67.048	56.607	48.011	65.837	78.821	44.538
65.065	81.389	78.446	65.683	68.959	75.088	80.092	70.118	69.231	80.833	66.908	61.347
75.09	81.389	78.446	68.276	68.489	75.088	87.474	81.51	69.231	82.517	66.908	65.097
117.16	106.48	105.74	95.132	103.05	88.811	86.522	111.4	242.93	106.37	78.534	59.217
101.89	75.359	88.607	77.381	82.543	80.268	76.465	82.431	136.27	78.552	72.058	42.444
118.44	138.65	123.5	114.94	105.92	116.18	112.4	127.83	146.1	127.19	104.9	79.682
115.32	113.69	130.81	191.56	181.42	106.11	125.69	115.99	128.71	135.24	112.96	79.645
130.54	113.69	130.81	191.56	178.03	106.11	124.15	118.51	101.7	112.64	123	88.601
148.22	98.867	115.31	114.77	137.19	94.454	83.688	105.98	99.513	100.36	138.16	60.27
201.83	165.66	191.69	157.44	150.38	164.16	187.9	205.65	164.84	149.58	185.95	101.53
138.07	165.28	158.4	148.21	150.38	144.41	156.33	191.14	155.79	134.57	168.57	108.11
110.37	145.95	155.69	138.71	141.74	132.03	126.61	186.56	153.66	139.75	144.02	97.331
58.222	95.86	111.92	72.547	75.008	106.46	89.181	99.244	82.203	46.534	97.99	71.144
58.222	33.908	36.12	55.753	45.66	30.023	25.827	26.334	26.162	36.024	35.201	25.122
44.525	38.018	44.395	49.622	44.533	36.633	32.531	34.582	25.322	38.023	36.505	19.359
53.542	44.927	52.11	42.794	42.341	41.962	45.318	43.792	36.055	38.378	59.009	43.854
58.572	67.224	71.949	67.631	65.701	53.858	71.233	61.998	49.759	55.684	73.063	59.284
66.72	67.04	60.809	57.901	64.726	47.665	90.812	61.998	49.759	81.945	96.029	73.069
88.813	76.375	69.102	63.734	66.078	51.565	85.738	80.117	66.119	89.888	94.07	63.278
67.134	102.61	102.53	63.734	72.106	87.467	115.99	130.32	114.06	88.31	128.45	65.427
117.02	102.38	104.62	91.565	86.145	101.44	99.357	95.976	84.62	81.028	112.72	63.887
73.578	84.052	75.455	98.982	80.576	66.592	67.646	95.976	78.604	91.341	63.482	57.965
114.91	84.052	79.89	75.108	75.976	81.641	67.646	98.837	78.604	93.822	71.189	57.965
62.722	79.84	62.696	85.146	61.981	57.016	93.155	84.169	76.835	96.372	69.494	62.602
51.081	78.611	64.247	75.835	79.102	55.898	83.066	75.841	74.449	125.06	68.891	74.229
53.732	57.854	69.623	77.202	76.766	58.402	67.814	72.029	52.152	65.295	68.891	46.426
87.823	96.792	90.676	112.8	95.713	85.779	97.225	88.211	84.306	118.81	82.836	67.784
76.282	43.782	49.615	56.611	52.74	42.001	46.213	46.445	38.816	45.5	66.085	29.105
134.33	82.756	80.583	99.128	97.91	68.959	99.118	70.713	71.179	84.187	82.254	54.849
147.34	88.081	111.22	132.53	142.48	98.443	69.769	52.712	70.804	93.971	99.869	45.768
179.26	191.6	189.49	179.79	171.36	169.92	162.78	203.28	263.51	144.12	163.55	106.38
231.33	191.6	181.68	132.1	140.03	152.04	211.09	203.28	172.1	152.53	226.28	167.99
112.88	104.21	106.21	148.62	113.6	99.688	105.3	123.33	88.857	118.75	78.415	76.271
78.511	83.81	67.647	60.645	60.862	66.091	86.171	98.559	94.303	95.479	77.509	63.679
35.678	32.006	36.14	57.886	49.694	31.403	36.37	48.514	40.036	36.91	55.323	29.871
114.75	104.81	113.42	103.54	84.737	109.58	106.97	99.433	104.07	107.17	86.995	74.642
114.33	85.497	93.894	89.025	82.463	80.143	88.224	64.428	182.77	86.508	77.355	71.338
82.848	84.252	96.076	89.976	91.905	88.232	73.084	84.107	99.047	65.477	70.033	55.497
82.848	88.586	106.35	135.44	126.24	91.125	73.084	75.614	60.166	65.477	102.43	41.959
59.935	46.469	37.583	33.916	28.412	43.104	48.654	75.382	55.704	67.494	54.013	39.276
40.96	64.847	66.282	79.987	86.879	49.836	60.573	51.943	52.402	67.494	62.245	70.877
53.358	63.563	52.11	55.521	50.084	54.114	67.638	66.348	60.35	67.28	74.165	52.344
66.069	41.819	32.134	28.165	29.789	31.983	53.956	55.983	45.319	58.171	52.083	37.897
71.497	91.433	58.841	49.816	43.861	52.633	113.75	77.765	99.091	141.3	80.007	75.185
56.186	42.105	29.914	29.337	34.277	27.995	58.684	29.34	37.903	61.914	41.822	49.913
17.285	11.216	11.455	12.143	13.441	15.026	13.715	9.4106	8.5114	14.353	24.805	16.314
21.958	14.596	16.939	21.162	16.954	18.9	11.578	13.731	17.135	18.267	48.899	22.277
25.618	28.411	17.296	24.856	20.051	25.753	32.465	23.145	30.365	45.147	43.21	30.904
37.783	36.86	48.238	42.09	41.493	39.913	37.245	34.06	36.743	25.147	34.373	53.262
26.048	17.668	33.241	23	22.997	23.718	18.496	23.213	17.331	14.193	19.346	15.688
49.765	28.753	35.628	42.745	44.379	26.836	27.095	26.75	29.781	21.801	37.133	25.311
50.92	40.527	40.697	39.714	38.623	32.259	44.905	35.41	27.591	44.566	44.418	22.587
44.279	83.835	69.62	75.08	72.947	57.43	95.665	70.163	74.882	118.86	98.106	65.47
85.114	105.31	100.86	78.65	84.433	84.495	112.72	88.789	81.377	127.64	98.106	77.712
37.959	47.71	54.56	72.158	71.196	44.217	44.99	50.688	44.576	53.665	53.348	40.074
45.392	31.842	29.981	41.469	46.907	23.34	42.72	25.927	22.354	33.928	47.102	32.592
46.397	49.093	48.427	64.24	60.911	39.562	49.081	36.961	29.34	40.468	65.105	32.592
46.397	44.365	43.12	47.392	42.516	37.816	54.288	38.431	39.373	59.138	53.324	36.481
60.716	44.824	50.912	42.084	33.672	37.828	55.318	68.374	48.643	93.579	52.456	40.226
56.875	65.501	58.881	62.785	63.29	44.02	78.135	78.398	64.51	70.476	71.6	43.135
57.904	67.789	56.805	51.338	55.436	44.02	80.13	74.165	68.401	70.476	86.455	62.281
57.539	49.362	69.3	79.148	76.721	57.598	40.784	49.142	33.935	38.9	52.164	37.703
64.197	49.362	71.136	84.38	76.721	58.208	41.003	52.187	37.066	47.192	51.224	31.417
143.51	119.22	103.42	105.71	88.009	88.707	136.18	105.98	86.6	103.49	115.48	70.459
82.338	66.899	65.051	73.584	77.144	60.443	80.154	81.742	74.938	103.49	58.967	46.259
59.378	91.875	71.344	72.81	66.373	52.039	101.11	103.17	87.895	86.356	78.143	69.377
68.121	83.22	70.927	75.96	76.588	59.204	87.642	103.19	87.265	91.636	70.657	61.9
50.539	46.816	24.751	70.227	26.22	25.386	52.073	75.554	62.36	77.981	46.897	45.783
142.06	169.49	172.94	152.37	169.79	147.11	168.8	126.33	150.57	181.22	165.4	112.75
80.858	131.41	124.87	125.33	112.71	114.21	123.67	150.11	145.68	144.35	124.66	99.802
83.833	104.75	71.458	114.47	102.71	68.49	107.76	106.79	105.58	139.94	98.278	72.412
80.491	94.006	71.458	102.26	102.71	68.49	79.844	75.425	304.13	125.24	83.205	56.379
77.2	83.319	74.045	82.231	83.637	59.637	92.25	89.983	64.419	78.423	98.869	71.806
65.303	57.176	55.89	54.164	62.048	54.6	56.815	67.701	62.988	63.888	54.267	38.388
39.056	91.72	81.84	81.259	69.721	75.677	86.723	76.253	82.946	112.71	84.832	58.01
132.41	126.57	128.45	150.98	142.98	105.26	104.08	100.79	97.496	133.34	164.57	73.445
201.53	151.76	177.22	132.96	132.99	154.08	186.34	187.17	156.16	176.11	192.74	118.34
62.4	79.208	56.839	94.462	95.461	51.646	89.19	106.33	98.803	115.16	69.018	66.607
62.4	101.92	97.877	117.84	106.71	87.325	101.5	87.373	98.803	113.85	94.338	66.607
63.609	102.3	99.536	130.16	137.91	83.504	97.533	87.373	88.725	119.77	94.338	67.882
85.445	86.495	82.347	91.592	99.017	91.288	93.46	125.06	111.25	102.67	78.889	72.257
58.416	72.772	61.944	55.149	53.076	48.287	60.905	62.57	60.309	61.947	61.057	46.555
46.68	27.294	35.853	23.318	25.474	28.774	27.157	41.459	27.437	30.056	37.344	38.768
142.67	90.446	91.586	77.331	79.482	79.975	90.986	113.81	95.359	90.911	83.653	63.275
59.839	42.041	35.878	35.105	42.3	31.186	44.539	50.69	44.992	54.529	53.733	31.948
36.487	20.392	21.174	24.903	22.975	18.059	26.383	28.405	21.684	29.315	36.316	20.129
46.182	38.921	27.079	24.547	22.722	25.64	41.277	36.665	35.122	35.366	49.112	34.647
19.637	30.058	21.364	24.103	19.136	21.278	31.014	27.743	32.796	44.469	24.515	39.646
26.333	24.523	17.603	19.624	18.647	18.232	34.843	21.928	21.529	39.161	18.179	33.298
21.363	29.009	17.514	19.624	19.708	18.232	29.331	29.173	36.325	49.665	23.865	31.733
15.662	14.453	9.3584	9.4406	9.4492	10.427	22.187	19.78	37.349	26.726	17.059	16.668
26.86	19.261	16.094	15.436	15.266	12.247	21.535	23.445	28.441	32.902	19.113	20.895
19.227	16.525	12.479	13.819	13.803	11.282	21.535	14.207	30.702	23.24	15.388	18.85
14.657	16.525	13.57	11.65	12.957	16.151	22.496	14.207	20.692	23.24	21.421	19.916
15.778	9.4091	6.8709	8.8839	8.7257	7.0132	15.059	13.597	40.379	16.118	11.595	14.62
19.877	21.174	11.735	11.821	10.824	11.49	17.357	20.598	333.55	10.122	11.595	11.983
19.536	18.309	16.026	15.25	15.798	13.688	17.357	13.827	36.263	10.122	22.698	15.753
31.112	23.592	25.644	17.996	19.418	23.696	38.155	25.826	27.859	38.914	32.339	26.036
30.944	16.835	18.379	22.226	22.805	24.913	21.081	12.803	22.744	13.459	19.881	14.916
23.538	13.171	17.769	19.949	19.806	17.181	12.513	16.429	28.436	10.873	20.101	8.2204
16.667	22.012	22.366	25.909	23.927	24.574	15.992	16.429	30.967	12.177	19.112	13.392
37.882	43.21	36.755	48.148	34.594	33.489	21.614	23.753	381.55	18.728	37.689	21.851
51.598	29.238	41.985	39.471	39.751	38.883	26.517	31.232	31.11	25.309	37.689	24.307
23.291	22.886	25.849	33.442	32.922	31.801	24.261	17.188	31.11	21.655	27.843	15.774
32.685	56.517	46.716	38.073	32.295	38.389	49.885	33.9	92.216	38.496	38.689	36.257
64.819	69.105	61.372	50.944	46.197	57.768	81.373	74.512	82.889	81.67	64.927	55.429
56.92	55.176	60.379	54.318	54.744	44.776	66.773	58.546	60.11	59.262	82.194	54.263
42.698	42.21	49.226	61.981	58.443	54.101	41.146	27.663	27.711	30.317	39.091	25.074
62.7	63.191	65.325	72.713	72.102	53.198	75.314	48.373	54.74	77.215	73.915	43.65
61.369	51.214	57.065	62.765	62.365	47.247	48.289	44.263	46.021	38.938	48.456	34.329
64.18	90.616	69.677	56.199	50.82	63.54	111.64	86.119	92.181	122.57	84.678	68.118
68.503	70.484	54.328	48.545	50.276	51.191	69.496	83.725	76.917	97.475	60.446	50.267
93.367	66.832	58.12	63.185	58.903	53.114	48.757	66.688	72.295	63.431	61.104	39.51
93.367	68.153	74.345	77.719	85.373	64.846	63.255	64.195	59.946	62.243	64.336	46.88
144.64	112.45	97.274	85.07	85.373	93.971	118.45	99.17	86.824	97.995	114.53	82.859
88.264	142.92	102.81	98.408	96.981	98.687	125.87	74.001	198.11	120.9	110.43	76.313
68.176	147.27	122.77	148.97	141.44	101.74	136.73	85.216	90.658	120.9	151.5	76.313
61.729	79.524	77.438	73.167	76.31	110.68	93.056	60.77	101.8	108.32	69.105	57.42
60.902	71.598	68.121	73.167	70.724	63.973	73.456	68.5	255.52	75.752	62.809	51.902
63.945	85.503	78.164	86.428	81.257	70.864	89.242	79.574	83.301	85.298	73.98	56.733
66.165	71.589	72.18	76.603	81.257	61.127	72.582	75.639	61.091	60.421	70.911	48.634
96.075	104.18	116.55	144.4	137.83	112.53	93.054	114.73	101.2	105.97	111.82	72.621
99.014	96.045	108.35	114.44	117.18	93.668	88.348	89.23	85.581	108.16	96.982	55.515
87.101	87.671	85.368	84.322	87.864	73.119	92.753	92.828	78.541	107.45	67.91	68.204
119.14	82.145	90.482	95.301	103.57	88.31	70.695	85.415	64.987	99.527	77.224	48.924
86.983	82.145	111.48	98.039	117.41	86.012	70.695	89.436	78.478	84.465	114.74	48.924
99.583	131.7	93.072	113.49	118.43	83.622	124.41	125.58	120.17	159.97	102.55	94.468
68.497	52.398	60.746	58.176	57.887	57.42	42.577	76.354	65.96	44.887	58.712	28.204
110.22	52.245	61.549	69.075	65.334	57.572	49.388	72.244	59.08	41.369	69.403	45.995
64.06	78.253	67.5	72.253	69.258	62.047	91.328	72.244	71.007	93.559	75.735	64.862
131.09	98.776	84.981	88.852	100.69	82.161	93.187	110.34	201.24	99.658	118.73	84.023
55.371	58.787	69.538	84.1	85.7	55.356	70.947	51.372	56.69	83.266	91.513	52.015
102.44	69.902	59.668	82.036	75.292	62.109	81.073	80.384	79.115	95.547	82.952	60.087
90.725	69.902	73.017	59.721	70.84	64.12	84.098	91.335	79.115	77.558	111.02	60.087
48.473	67.162	73.017	58.381	69.658	59.635	59.624	78.558	453.14	53.106	73.585	39.993
56.306	57.97	63.827	62.229	69.111	45.281	61.68	53.007	85.067	41.131	102	39.264
67.472	64.543	71.641	78.277	73.624	60.514	64.766	70.481	51.692	51.385	75.872	45.397
76.254	78.33	81.299	115.47	82.545	89.029	65.726	65.314	68.45	81.342	91.781	40.778
155.28	108.71	100.76	112.35	115.07	89.862	106.98	113.13	124.99	138.81	118.56	58.352
128.5	138.67	162	170.68	172.87	154.93	148.52	165.49	168.76	171.27	153.99	112.06
122.47	168.39	130.87	129.05	115.8	103.62	153.95	174.22	154.83	187.71	146.81	112.06
86.872	115.06	113.22	104.9	124.87	91.074	114.7	133.96	116.82	118.17	142.38	89.527
86.872	95.461	92.165	134.4	126.63	76.369	100.93	70.35	70.117	105.67	123.49	52.177
107.5	132.5	119.19	135.32	132.63	109.52	132.17	120.33	106.34	124.55	124.71	88.614
95.899	94.061	92.908	87.891	71.176	84.93	85.382	116.73	79.265	69.909	84.354	62.736
75.835	77.605	74.989	76.447	78.331	69.41	72.18	62.68	70.155	64.464	56.939	45.627
77.449	114.67	94.841	108.07	105.38	81.503	115.25	96.955	99.379	132.99	100.64	124.69
111.35	88.991	107.04	125.01	116.74	88.799	86.978	85.544	85.052	85.219	111.37	52.801
97.622	88.991	106.26	157.39	135.2	80.983	86.978	83.974	75.534	98.756	91.81	52.801
142.2	86.179	98.567	105.04	122.59	80.983	83.317	90.209	75.873	88.319	84.83	55.916
77.457	93.66	74.187	70.454	54.251	76.28	111.98	124.63	114.09	94.548	73.177	74.16
106.44	99.012	134.88	131.14	130.65	104.6	111.98	94.725	110.51	108.24	110.8	74.16
107.34	130.45	154.95	147.97	146.1	130.79	123.76	117.79	99.339	83.89	151.79	69.938
103.66	140.01	122.09	137.41	128.64	110.13	116.64	148.16	114.51	154.83	120.18	62.014
121.18	119.4	117.5	101.29	109.71	95.927	133.19	140.38	115.42	154.39	84.935	78.065
110.79	117.08	100.02	99.055	85.14	82.331	107.98	122.49	98.321	116.81	84.935	63.822
101.98	66.584	59.288	55.344	45.499	76.388	46.994	81.878	70.423	54.655	80.915	46.93
79.644	68.734	64.642	63.058	65.087	55.744	46.461	58.841	83.592	69.204	77.558	43.337
98.792	83.814	65.912	77.615	67.312	65.928	87.792	115.65	124.49	68.054	89.855	66.177
98.792	60.779	63.278	83.963	79.345	54.669	57.939	50.378	111.02	66.427	86.977	38.117
47.979	39.492	40.894	44.837	47.265	34.946	37.798	48.039	42.256	41.228	45.273	27.988
38.969	54.166	44.121	42.494	31.911	38.873	50.392	63.178	59.638	57.098	39.019	40.042
68.617	54.166	37.521	35.174	42.219	30.602	59.5	45.384	41.974	50.876	67.469	40.364
84.335	75.421	74.185	65.994	64.241	72.521	85.535	78.685	81.097	84.844	87.555	63.665
34.233	28.781	49.121	47.341	42.204	38.279	28.292	31.996	20.561	40.323	26.704	60.066
31.336	23.659	28.072	39.686	31.608	24.061	18.702	23.513	18.061	22.769	22.682	40.184
32.026	27.013	29.986	36.447	30.455	26.68	21.693	23.673	20.118	21.482	22.682	37.977
16.099	27.139	24.796	48.214	18.373	36.831	12.727	23.217	32.12	17.035	37.773	22.66
12.86	11.356	15.008	18.361	18.294	12.909	12.082	12.528	22.955	7.7396	14.854	11.981
22.06	30.791	35.324	27.533	31.526	36.439	34.258	28.287	19.126	11.588	29.411	25.476
38.968	32.654	40.553	39.725	41.478	41.226	38.224	34.832	39.701	23.831	33.143	25.008
34.784	36.693	54.833	58.492	38.968	44.019	35.048	41.418	42.301	20.491	33.804	26.348
19.298	21.123	24.568	20.59	21.507	17.057	22.32	23.217	23.5	7.8708	19.824	13.375
22.376	31.92	41.279	44.317	36.671	33.767	20.723	27.94	20.844	21.235	23.304	22.499
37.476	36.232	43.972	37.943	39.218	44.341	34.613	28.275	23.385	16.332	48.14	22.953
26.497	21.23	25.924	25.133	29.436	24.874	16.922	22.73	18.002	13.383	22.25	15.654
29.624	20.506	24.106	26.195	23.836	22.156	26.6	14.48	16.577	19.684	35.642	23.423
27.683	25.511	28.987	36.54	31.588	26.359	29.718	20.057	22.527	15.69	21.945	23.103
30.605	28.658	33.936	34.258	37.074	26.863	24.218	25.722	31.164	23.022	36.257	19.91
63.111	60.581	60.964	55.197	54.811	52.939	68.391	55.61	42.921	51.119	73.829	49.615
65.383	78.6	80.395	69.025	85.516	70.966	84.728	72.438	69.758	71.711	95.75	52.627
26.579	32.062	36.211	28.344	31.973	30.013	35.104	29.088	29.184	22.301	35.993	26.398
21.285	11.922	19.523	16.509	14.1	16.827	12.129	14.583	32.205	8.2493	21.227	10.561
25.646	24.283	32.915	31.288	31.834	31.673	17.744	21.543	23.165	17.353	21.3	14.194
28.464	27.915	36.669	27.314	29.729	36.52	26.995	29.613	27.05	13.474	39.038	17.383
36.562	40.7	33.41	44.688	33.27	30.681	38.89	27.801	49.187	38.411	30.694	35.796
31.543	25.838	37.644	40.152	51.695	39.117	37.218	25.352	37.967	35.417	48.65	26.828
64.685	60.649	68.187	65.862	67.624	60.241	62.226	66.769	59.702	66.28	64.642	38.539
55.946	55.502	51.564	59.876	60.979	53.542	62.226	56.572	49.607	53.493	75.327	38.78
56.361	60.896	70.707	74.087	81.836	76.195	46.25	38.503	42.069	43.212	70.851	47.242
54.681	22.308	33.567	37.182	38.967	28.661	24.517	33.547	36.873	20.172	46.876	34.019
57.816	82.844	66.42	80.907	67.491	62.257	99.212	73.058	78.674	111.61	79.677	59.583
67.646	68.477	49.91	56.719	59.779	47.969	70.252	84.497	65.654	90.068	81.705	57.78
65.554	70.197	72.19	75.494	77.702	58.619	61.255	57.242	60.859	50.879	90.2	42.637
57.825	69.162	74.653	83.526	85.317	63.78	49.407	56.534	57.1	45.153	74.194	34.604
57.042	63.114	77.96	69.332	80.521	69.576	79.77	51.637	65.611	59.619	94.016	43.627
46.573	75.887	55.803	68.939	58.053	61.4	90.617	63.011	170.96	105.1	68.296	66.063
41.05	71.056	64.172	98.981	99.353	49.468	74.896	44.109	56.33	93.418	65.899	52.067
98.376	104.62	118.06	106.68	107.32	97.471	97.425	89.911	94.167	102.96	101.85	66.351
73.402	130.31	116.51	138.98	131.65	102.01	109.24	126.22	165.61	122.34	93.661	71.978
67.086	65.438	59.841	55.98	57.698	63.748	74.998	79.84	81.908	81.337	57.835	43.253
49.278	30.044	40.626	25.623	32.857	33.033	36.905	48.652	46.812	29.328	37.319	32.397
96.422	126.99	104.49	128.03	118.79	93.982	141.35	93.202	94.312	148.75	110.71	79.58
76.545	67.683	46.301	36.679	30.501	68.163	79.465	67.567	157.44	101.15	47.639	47.981
68.744	107.28	83.48	83.733	73.999	85.199	127.07	114.7	156.84	144.02	79.469	82.678
56.471	91.598	83.48	68.808	78.156	67.624	108.2	104.41	93.942	76.798	90.826	69.824
52.826	59.702	63.191	59.408	58.49	58.361	64.78	49.894	50.443	39.964	76.753	39.276
55.497	59.702	63.191	68.798	74.284	58.361	55.898	45.646	63.894	41.769	70.177	38.839
43.421	62.526	58.825	94.87	90.741	52.261	66.155	47.336	66.263	53.706	86.402	38.839
61.615	126.06	109.8	136.05	110.44	108.47	110.04	90.701	97.709	114.55	121.23	97.488
99.681	85.191	64.349	62.662	62.693	69.605	87.951	109.9	112.7	102.42	106.12	67.002
82.24	130.91	133.39	128.99	149.08	109.21	114.29	79.478	84.249	103.37	142.87	69.972
61.949	82.421	97.116	99.456	93.325	86.642	102.68	67.49	80.663	98.666	117.45	68.92
65.061	69.525	72.106	72.345	66.26	120.02	59.246	94.413	87.342	78.548	46.723	49.127
101.03	126.72	108.07	94.343	83.001	138.94	147.53	125.04	112.28	129.26	124.85	84.576
60.401	64.142	61.827	60.706	55.968	61.265	54.1	51.364	119.95	39.594	62.464	37.174
30.5	29.139	40.568	40.702	39.033	43.629	22.571	21.553	25.742	22.75	29.431	25.166
26.613	49.673	64.327	46.467	57.272	47.811	35.591	46.636	61.333	25.968	43.724	49.994
15.841	18.313	23.123	25.91	27.439	46.805	14.038	13.757	16.283	16.129	16.589	11.112
20.962	13.329	22.826	21.987	19.609	26.503	11.245	15.052	10.719	10.877	13.387	18.733
23.299	25.585	35.877	39.286	36.9	36.775	22.842	24.751	20.764	17.892	25.605	19.401
23.299	38.205	27.252	24.873	24.292	31.598	36.592	32.174	40.249	16.078	31.916	50.447
16.308	23.459	29.938	24.439	28.743	34.215	22.138	18.239	19.965	11.849	29.18	15.553
22.777	21.27	21.513	24.457	21.615	30.752	17.906	22.518	31.254	13.957	21.14	16.476
37.189	31.672	51.668	35.555	31.356	58.012	29.603	33.817	31.254	17.458	39.274	27.028
43.964	35.749	54.574	30.636	29.579	58.012	42.92	47.471	55.097	14.121	60.95	27.028
49.279	59.5	79.82	34.994	43.754	77.639	48.969	84.029	59.964	19.208	57.984	68.987
36.689	27.558	37.765	33.81	34.745	30.306	23.859	21.426	21.954	17.713	27.611	21.379
36.689	32.669	37.765	33.81	34.745	30.027	26.924	27.351	32.573	17.713	30.114	43.985
36.385	31.706	40.7	32.686	35.756	60.122	20.788	27.888	27.595	21.671	36.604	21.696
36.385	35.953	40.7	32.686	35.756	43.644	35.818	33.977	30.387	29.105	45.135	45.499
19.395	23.8	32.926	23.173	21.439	40.443	30.836	26.711	31.006	11.424	28.1	22.955
31.749	26.893	32.884	40.866	28.722	36.345	20.002	26.084	28.796	17.494	25.712	31.039
26.774	32.356	33.939	35.551	35.779	31.501	17.796	20.641	28.796	18.278	27.474	56.005
32.579	31.408	33.879	34.348	38.644	33.706	22.394	29.614	30.218	18.828	25.191	16.953
33.345	26.758	33.879	34.348	31.319	33.706	21.56	27.454	23.574	20.717	25.191	22.148
38.772	39.472	47.648	43.807	41.661	62.61	33.015	39.469	29.913	17.333	38.866	36.109
43.349	39.49	48	61.485	43.907	71.988	29.802	35.842	30.216	22.627	37.771	35.115
34.435	43.253	48	68.97	45.102	44.571	34.57	38.783	33.868	23.132	50.396	42.436
71.728	55.088	65.171	72.197	47.206	58.535	37.129	53.798	43.344	32.329	60.711	52.79
30.095	42.485	53.522	39.394	39.171	44.544	37.641	44.237	34.879	24.599	39.241	23.188
21.104	18.238	22.505	30.922	21.858	47.366	10.272	15.653	16.228	12.712	14.307	31.953
39.96	35.424	41.664	41.902	38.401	64	23.173	35.157	52.008	23.442	36.319	31.348
30.722	38.778	43.678	31.102	40.503	64	31.745	38.106	61.75	24.939	59.787	51.347
27.548	23.86	30.707	23.883	34.789	41.173	21.738	21.448	30.28	24.939	22.228	51.347
15.13	21.122	30.707	24.46	23.477	41.173	21.738	21.448	20.64	12.417	22.228	38.4
28.646	24.966	32.496	35.333	26.011	29.756	19.639	24.929	25.343	12.878	38.285	38.4
28.646	22.452	23.219	35.333	23.532	19.599	17.155	14.702	25.461	16.21	19.99	15.552
22.954	35.127	34.851	46.123	40.142	40.93	31.836	24.796	34.316	29.593	23.892	34.151
22.421	33.137	47.872	44.426	38.387	54.357	19.791	28.008	32.762	26.156	56.093	46.168
28.777	32.806	42.406	46.823	41.21	51.848	24.391	28.332	27.01	24.068	31.85	27.684
36.203	35.892	52.922	39.983	36.995	45.065	36.473	32.851	24.73	20.786	46.735	29.26
23.116	39.753	52.922	39.983	39.732	45.065	39.813	35.654	32.189	20.786	46.735	36.009
26.711	64.159	56.553	41.992	45.282	43.141	60.521	72.44	49.278	49.972	75.435	53.137
31.684	47.008	59.582	50.703	51.963	47.325	46.773	40.516	64.563	31.513	57.466	36.792
36.104	42.773	44.074	37.822	38.231	38.536	45.746	41.163	45.612	39.528	63.09	29.447
111.75	105.3	128.49	102.43	99.963	102.25	93.124	90.068	98.71	72.283	135.2	66.498
36.421	50.594	65.655	54.592	52.288	60.948	65.119	55.188	40.711	34.865	59.908	25.835
47.145	46.907	63.82	45.164	48.539	119.38	54.642	49.615	38.55	45.487	54.227	38.823
41.053	46.907	40.812	44.069	45.634	38.565	57.17	42.692	49.251	38.964	60.182	43.959
29.37	36.435	42.195	44.069	41.487	33.784	50.56	32.675	26.929	25.178	45.115	34.254
20.09	26.79	33.198	22.981	24.064	33.796	27.505	29.371	22.106	16.075	31.057	48.004
37.594	41.55	59.287	42.293	42.562	48.81	36.29	45.242	29.986	13.432	46.287	43.43
26.528	22.717	36.874	24.18	23.404	48.81	17.635	28.942	43.909	12.067	37.411	28.937
23.941	37.913	41.303	45.172	48.292	68.52	24.509	33.019	49.215	20.821	33.729	20.784
31.939	39.992	55.396	44.862	55.782	80.142	27.115	40.528	28.124	19.954	50.009	24.855
19.062	24.198	25.923	37.162	41.63	55.131	22.555	15.127	27.602	27.401	23.015	21.734
24.474	33.659	38.813	49.871	51.889	40.706	22.953	25.374	24.661	29.929	27.36	25.847
34.978	30.542	47.243	49.871	53.856	69.6	32.993	31.348	28.543	29.929	40.382	25.847
28.742	29.081	32.41	56.025	42.381	52.217	21.401	22.253	26.634	21.259	19.943	17.723
34.945	36.972	50.214	45.707	43.022	72.208	26.305	32.799	44.115	21.259	52.441	42.204
56.775	51.545	67.074	41.209	49.428	71.026	41.642	44.761	35.641	26.499	50.249	40.403
44.723	35.284	49.404	41.209	41.8	50.14	35.205	47.019	33.135	17.232	42.823	30.336
55.607	39.607	52.45	60.307	56.031	52.366	34.187	36.076	25.121	25.021	42.984	21.672
33.661	42.574	71.108	60.307	52.705	58.873	38.109	37.09	90.106	25.475	49.702	33.429
21.768	32.048	35.905	34.305	32.595	63.039	22.85	22.327	55.966	18.223	27.315	21.393
87.514	74.129	96.127	92.374	100.18	83.487	56.176	57.519	59.742	41.321	70.831	42.179
73.702	74.129	99.074	83.875	81.204	86.83	65.969	78.023	152	41.139	73.788	42.556
24.575	28.813	37.445	31.679	28.814	37.412	25.835	30.034	22.65	11.012	39.086	29.844
74.702	37.985	56.041	40.393	38.853	48.432	33.137	49.513	40.15	21.797	52.54	41.32
32.23	47.539	52.368	58.178	60.192	47.632	39.7	32.822	37.03	24.39	28.889	38.808
32.23	37.893	38.207	34.645	39.522	35.659	39.7	32.822	28.779	24.39	39.651	31.083
28.914	30.511	33.96	30.032	38.64	27.116	26.522	28.342	21.559	21.619	30.516	20.416
28.914	33.935	38.477	38.431	42.556	30.706	28.087	36.437	30.497	21.619	68.113	21.244
36.408	46.228	52.003	56.399	66.465	45.058	42.984	36.025	49.26	29.123	70.113	37.893
51.343	54.924	63.967	47.779	51.726	52.891	49.623	55.378	48.641	38.378	76.376	35.816
54.234	51.343	63.967	47.779	58.628	57.265	49.623	42.643	41.902	41.003	69.19	33.345
39.613	45.87	45.344	46.167	53.768	55.19	39.89	40.03	33.091	25.875	40.868	33.924
67.377	41.324	58.571	42.01	37.229	49.194	37.009	43.493	33.424	20.887	34.149	30.266
44.615	44.679	54.568	43.688	38.098	41.619	48.81	42.742	35.816	27.309	44.915	29.589
41.259	31.605	37.265	35.517	38.896	30.415	31.765	26.096	37.473	28.22	42.752	26.267
29.43	40.367	46.889	49.922	42.127	50.324	28.433	44.763	32.518	24.054	26.776	40.256
16.195	13.608	13.32	17.713	15.419	15.204	9.2463	11.173	27.648	12.055	9.9003	9.4169
20.045	22.263	26.565	29.096	30.414	31.347	18.184	16.542	28.722	22.376	16.155	16.996
35.863	61.145	67.757	70.909	76.79	57.387	84.841	32.911	74.528	61.954	53.538	56.497
70.071	66.115	77.286	79.985	64.614	65.772	57.387	79.07	57.291	50.758	67.344	46.462
23.732	24.904	29.256	33.973	26.773	21.764	24.502	18.072	21.321	18.389	23.038	14.578
23.732	18.934	29.952	28.691	29.071	24.169	18.892	20.226	24.314	16.16	27.782	9.6265
27.231	18.934	29.952	28.522	29.071	24.169	12.798	20.226	27.134	14.651	28.1	16.22
16.826	19.528	29.011	24.642	26.236	28.54	18.859	17.999	17.47	11.504	14.127	13.954
29.669	27.694	40.632	30.333	31.966	30.613	25.506	25.371	18.033	11.798	32.736	19.274
11.388	11.887	20.077	11.859	12.152	16.796	13.998	16.764	12.41	5.4065	19.081	13.239
17.604	21.263	28.403	32.201	18.628	28.223	17.07	26.118	26.411	10.222	22.804	20.964
40.165	32.333	45.876	32.201	31.966	37.655	30.205	35.619	25.77	14.991	34.113	27.127
32.441	27.907	39.472	31.234	31.156	28.015	25.28	27.09	22.376	15.563	50.35	24.604
32.821	40.76	51.216	56.73	49.738	50.065	29.993	39.829	35.518	34.664	39.604	27.211
26.477	28.097	44.25	39.211	41.592	40.139	21.643	27.669	34.708	22.074	24.116	24.068
35.637	40.837	46.416	39.204	38.171	50.076	36.507	34.693	31.804	29.547	27.597	35.144
46.274	46.293	57.388	49.633	48.41	50.21	39.289	39.713	52.072	31.453	43.443	33.796
24.651	20.046	25.422	23.547	21.424	27.894	22.426	18.655	13.564	14.425	24.068	46.448
27.886	32.443	41.239	43.069	44.617	37.645	32.012	25.961	23.202	24.279	33.379	46.86
28.587	32.404	38.756	38.976	37.718	33.581	27.062	25.961	36.716	24.279	31.614	24.98
24.925	30.693	39.786	38.976	32.521	31.817	28.849	36.332	43.963	21.083	36.017	20.124
36.197	44.955	44.71	76.05	67.212	35.501	33.371	29.791	29.1	23.632	49.905	33.148
37.792	38.408	49.793	44.822	43.088	46.627	33.367	40.365	28.715	18.972	46.228	29.301
46.23	38.171	50.945	51.191	44.15	48.032	29.868	35.902	31.123	24.37	30.067	29.976
27.738	32.561	30.148	43.222	37.981	38.03	19.045	25.749	21.977	23.669	29.492	34.624
21.535	24.326	38.154	36.283	41.876	33.844	23.223	24.686	18.163	20.434	25.13	13.741
48.343	29.901	42.537	38.69	37.935	39.085	24.239	32.221	27.932	24.688	54.786	33.673
41.505	38.883	38.428	38.163	46.515	58.326	31.189	33.729	60.401	22.493	48.513	33.673
26.405	35.238	35.038	35.3	38.799	36.766	28.906	31.183	36.845	30.001	32.898	21.268
29.182	44.326	48.658	44.542	36.277	52.715	35.731	58.633	44.385	24.126	65.368	40.52
32.676	23.147	29.693	24.118	29.256	33.432	25.53	25.44	21.456	13.965	35.208	26.322
31.853	39.787	37.574	47.948	47.332	57.407	45.983	39.547	60.56	29.063	34.995	28.24
31.853	24.777	29.069	38.543	32.357	23.644	35.037	20.806	29.798	25.207	18.027	35.468
30.1	37.08	40.813	56.684	41.144	36.404	35.037	20.46	37.684	31.238	50.174	28.166
57.788	40.486	59.89	61.297	61.15	56.368	32.831	36.522	31.269	35.024	51.246	33.321
31.098	22.929	28.414	29.377	34.15	38.951	24.141	26.859	15.601	17.277	16.338	16.62
39.158	28.161	38.959	43.648	34.15	31.378	27.625	15.826	22.946	24.879	27.796	23.686
58.825	56.618	81.657	71.655	62.483	58.081	51.774	46.578	38.952	35.123	48.979	41.247
58.825	58.335	81.657	75.618	67.643	70.82	62.186	54.169	70.415	42.824	57.298	41.247
23.901	22.647	33.199	33.457	31.817	43.072	19.27	19.015	28.284	21.188	21.26	31.582
22.049	24.832	39.999	35.806	22.17	33.482	25.447	24.857	27.474	21.188	32.248	27.582
22.049	23.1	32.399	27.578	22.666	30.687	22.672	21.807	21.642	26.009	27.302	41.542
39.026	42.819	51.212	59.557	45.918	52.946	42.733	47.425	36.918	39.058	33.616	45.569
38.226	71.98	69.831	80.714	66.622	130.69	52.52	61.231	75.193	44.529	67.663	86.771
43.601	70.177	67.895	102.45	65.647	226.25	45.43	59.247	57.54	36.794	49.752	60.071
23.44	39.543	47.11	54.259	43.948	66.421	27.418	37.373	39.992	27.887	36.034	24.125
23.701	25.893	32.256	51.07	31.961	34.743	33.173	21.323	25.931	18.713	38.412	24.125
30.485	41.225	43.307	49.813	35.583	95.387	24.6	31.052	37.833	22.399	37.576	32.656
34.296	44.582	33.258	57.427	40.373	62.264	24.6	28.486	104.67	36.012	36.35	29.715
75.596	67.77	84.827	61.153	60.978	98.358	51.499	74.802	70.094	30.699	89.801	64.206
51.627	29.009	37.543	46.738	44.161	50.822	24.166	25.001	18.27	23.317	33.282	31.034
37.065	73.15	57.519	111.54	82.67	142.85	32.177	48.057	66.931	46.92	61.241	115.93
53.507	57.863	72.099	72.624	75.766	81.108	39.242	44.097	45.713	42.051	44.474	398.28
43.25	50.516	34.602	74.646	39.909	76.285	31.596	31.72	37.927	32.827	32.807	41.384
38.074	34.244	48.592	30.859	37.793	49.567	28.866	36.7	36.289	16.713	37.806	19.551
34.791	30.006	48.592	33.701	37.793	44.562	28.866	32.453	24.808	16.128	35.853	22.152
34.791	30.336	36.434	37.562	34.666	43.157	22.805	25.111	40.385	19.096	29.867	31.979
71.504	56.842	84	56.393	62.7	80.072	62.723	66.563	40.385	26.793	77.418	41.149
45.186	41.628	64.56	40.486	43.179	57.069	51.581	45.501	39.305	20.879	65.749	22.969
42.25	26.658	26.81	34.506	30.95	35.175	23.482	24.696	24.231	16.793	29.862	19.304
28.945	46.542	40.299	50.705	65.661	68.914	33.324	29.164	37.555	32.279	37.205	59.076
48.513	49.362	54.911	74.24	64.965	68.724	34.862	40.408	40.194	42.361	44.546	51.343
47.281	49.237	63.362	74.24	60.238	80.687	36.55	43.191	33.161	42.361	44.991	20.311
38.154	24.574	31.405	43.368	35.16	30.466	20.734	29.162	31.81	30.097	22.132	19.675
38.154	36.129	37.97	54.678	43.504	40.237	38.706	26.223	69.618	30.097	34.379	28.921
40.539	63.08	70.884	76.933	57.056	82.713	42.415	52.245	114.28	30.705	71.683	30.296
53.783	52.697	56.347	57.984	48.988	83.845	42.14	41.21	56.476	37.858	48.686	35.707
34.664	36.788	35.295	50.156	33.641	54.186	22.686	28.137	37.652	24.976	47.552	34.583
32.444	40.971	51.144	55.869	55.82	64.743	31.895	38.727	37.652	28.983	41.991	31.097
61.515	107.15	143.63	101.89	69.957	179.02	71.598	104.62	165.42	31.665	156.79	71.002
27.694	40.011	44.49	55.244	38.663	36.623	29.268	32.196	35.478	21.422	31.167	67.11
22.531	31.72	26.797	28.294	31.257	40.125	18.862	24.386	24.694	13.161	35.269	21.126
25.852	33.669	48.675	40.477	34.235	60.493	24.628	40.62	27.567	18.665	56.688	55.938
30.03	39.651	54.731	40.477	44.891	45.095	30.965	40.62	32	23.735	55.966	59.535
29.766	30.152	33.809	37.742	33.013	37.015	22.151	30.426	21.334	26.926	39.59	46.832
24.538	30.152	32.674	29.859	26.192	34.698	22.151	30.426	24.922	27.065	31.876	25.026
18.603	31.294	37.821	35.634	30.91	44.805	38.991	28.641	38.888	28.22	33.361	20.867
63.666	57.869	55.4	63.237	52.123	65.778	41.971	46.635	39.676	50.77	47.094	75.647
55.406	60.466	55.4	69.214	67.285	112.51	43.983	48.73	45.044	48.89	47.591	46.504
24.121	38.702	48.235	43.515	43.138	78.533	31.141	40.409	32.706	22.489	43.563	41.492
47.298	69.634	88.605	94.215	79.708	100.06	60.998	63.547	46.956	38.964	61.751	41.78
37.45	59.109	57.161	82.77	43.745	85.742	34.476	36.914	63.527	32.829	49.79	41.241
38.937	62.692	79.729	69.215	68.368	95.656	42.337	56.049	73.191	44.638	61.414	49.146
16.34	35.144	29.77	34.424	32.429	45.406	19.668	21.443	30.36	19.93	22.395	20.377
22.71	23.818	29.999	33.345	36.031	45.406	23.088	20.463	14.806	14.316	55.689	26.877
21.096	34.341	45.441	47.911	41.559	53.58	36.652	27.924	33.912	20.634	41.659	31.457
27.77	18.557	22.172	24.957	23.828	27.288	27.045	20.159	18.987	15.554	33.657	15.179
26.343	22.918	25.069	34.23	22.741	30.678	27.045	23.868	32.4	16.52	33.317	45.576
45.772	59.587	61.517	58.206	48.13	69.039	43.583	48.044	44.73	29.866	52.28	61.306
26.263	26.855	30.433	29.171	29.147	40.214	24.71	25.577	26.977	15.42	27.145	22.187
31.401	26.992	32.208	30.49	33.807	32.245	23.105	32.446	36.475	17.421	34.928	37.353
32.92	26.29	31.178	36.422	29.463	34.58	22.107	28.496	20.495	15.635	30.133	14.927
26.597	26.29	39.955	32.061	28.844	31.974	28.776	28.805	27.268	13.498	39.249	22.057
28.839	31.851	36.761	25.669	27.718	34.238	28.099	29.646	18.273	19.039	84.621	18.133
21.725	37.424	47.032	31.517	27.573	40.672	37.338	32.267	43.381	32.262	70.893	32.868
35.922	37.469	44.832	42.69	35.913	40.561	42.775	40.144	29.247	24.376	44.603	35.531
37.114	54.817	61.674	53.17	48.073	58.664	54.663	54.927	85.892	28.845	59.459	45.293
16.217	25.685	32.308	29.555	23.176	38.74	21.066	26.952	26.902	19.275	25.538	29.715
27.384	21.289	24.729	24.174	19.573	26.217	20.56	24.545	16.025	19.275	30.852	25.83
27.384	27	25.407	30.137	19.333	25.243	25.472	25.573	23.208	16.412	28.373	20.732
29.919	35.375	38.933	35.311	35.89	37.584	36.142	36.355	36.846	24.268	38.846	25.991
20.497	33.097	41.464	33.392	33.604	38.828	28.193	34.328	27.276	22.482	39.533	30.121
43.609	84.379	93.787	73.619	57.403	88.103	47.356	79.262	189.43	28.623	77.493	81.246
49.707	70.008	83.965	67.168	60.31	111.53	46.631	72.413	51.384	25.284	86.268	71.675
66.852	92.924	121.07	106.37	106.53	111.53	65.693	85.54	74.716	50.024	86.268	71.675
46.304	42.951	49.989	55.108	48.087	73.113	28.993	44.022	31.775	32.235	41.634	51.653
43.889	32.531	52.384	49.63	35.31	63.744	28.841	35.908	20.712	18.811	30.903	27.537
31.489	58.579	69.075	44.939	61.012	94.99	49.336	51.022	115.61	28.822	68.435	54.972
30.606	46.009	43.399	37.317	45.194	102.6	32.079	43.685	32.242	24.914	52.714	34.303
71.546	52.868	75.288	50.172	53.239	155.57	49.608	62.133	38.5	32.373	112.18	65.773
31.496	32.732	37.945	35.605	33.734	45.581	21.768	33.4	38.562	17.831	49.142	33.56
38.642	58.343	82.946	79.481	73.759	98.945	36.71	46.6	38.222	33.732	54.51	44.647
34.171	42.496	51.546	48.838	39.825	70.299	33.507	39.124	35.174	26.199	41.736	52.808
31.695	34.659	38.533	59.664	44.961	66.366	23.939	22.912	29.942	26.72	34.316	17.211
33.349	38.375	41.085	59.664	46.086	38.388	26.377	26.645	35.64	29.416	34.316	22.361
36.68	32.13	43.657	33.788	37.397	42.591	25.982	39.592	23.567	20.997	25.918	44.467
23.539	47.943	27.969	44.73	40.524	55.331	38.277	21.158	51.402	43.135	44.084	48.423
29.016	32.483	33.999	31.829	29.218	45.878	23.892	30.1	47.949	26.425	25.036	37.418
26.129	28.224	33.647	38.953	32.474	55.147	27.191	26.517	23.492	15.318	18.364	21.613
32.591	30.268	35.046	46.15	35.024	36.228	26.698	23.964	23.492	15.137	40.383	18.653
27.836	30.097	37.038	33.792	32.693	38.414	28.783	35.821	73.379	20.478	31.132	22.76
38.511	33.009	41.138	47.737	43.46	35.532	24.375	27.091	24.585	23.655	27.474	19.296
21.475	25.07	27.741	34.817	27.491	22.195	25.417	20.691	16.45	13.241	32.176	14.828
36.015	32.018	41.504	43.538	37.966	40.193	34.088	36.23	41.309	26.901	41.349	20.338
29.274	31.579	39.208	35.698	36.928	30.773	25.218	32.613	41.309	26.087	30.079	38.393
27.877	34.898	35.639	45.78	36.357	36.956	21.595	31.092	53.306	37.853	61.599	42.946
21.774	22.746	30.99	40.58	31.812	26.477	25.889	18.522	65.492	24.916	28.698	17.235
32.654	35.276	41.238	52.773	42.562	32.307	25.524	30.631	24.262	27.274	32.172	22.149
22.193	35.276	37.282	46.454	42.348	31.55	29.547	31.92	30.679	30.817	33.291	26.044
26.808	45.513	53.738	65.006	52.953	62.417	30.617	32.198	40.586	28.381	42.714	28.67
31.994	57.748	60.142	72.706	58.681	63.5	40.852	56.727	38.75	46.366	42.714	33.87
28.112	25.08	31.858	35.873	30.349	36.666	23.672	27.267	63.096	14.359	28.202	24.947
35.803	36.466	50.726	38.865	44.64	44.696	38.828	34.804	41.272	24.057	43.758	52.323
34.612	45.355	62.482	60.695	62.014	52.383	36.86	38.703	35.546	26.286	40.147	26.826
28.241	25.286	30.155	29.312	27.062	31.534	22.397	20.292	24.118	18.577	28.289	20.644
34.573	38.47	44.834	50.974	45.245	38.207	25.795	31.548	29.642	29.982	31.16	35.101
19.125	17.302	18.303	22.508	20.035	25.548	11.976	14.964	20.894	18.557	23.663	12.183
17.371	22.28	25.697	22.508	22.037	26.004	24.749	16.186	17.781	23.457	23.663	32.93
37.419	31.957	49.307	33.3	34.123	45.8	31.172	28.544	38.369	26.254	30.305	38.036
55.612	65.024	76.078	69.137	72.943	76.294	54.43	69.376	58.289	39.848	79.72	44.9
35.355	32.235	39.305	37.249	34.055	31.03	39.315	33.882	31.887	24.083	35.673	31.936
24.269	66.138	80.664	44.085	54.506	91.216	53.324	63.699	83.983	28.674	77.385	94.311
24.001	34.282	54.61	39.546	35.705	46.69	25.909	34.409	28.279	18.562	44.115	32.858
20.871	23.625	60.29	31.083	33.916	37.282	23.564	31.05	28.509	25.65	38.67	26.707
26.703	36.415	45.42	47.493	49.79	39.568	28.601	25.074	36.353	28.79	23.453	36.149
27.086	36.415	41.662	51.039	51.744	39.568	34.638	29.313	55.707	32.402	26.245	28.696
19.938	20.049	21.28	26.861	24.878	46.121	15.497	18.117	25.273	20.327	28.792	12.881
23.31	25.951	26.529	33.724	27.602	34.33	18.513	16.928	59.603	21.755	21.909	21.816
35.232	59.395	51.978	83.325	57.205	84.961	43.415	43.325	52.199	34.368	48.619	78.029
31.764	32.096	32.054	45.53	34.289	61.915	18.828	26.159	30.757	23.386	23.099	22.907
19.724	20.429	24.918	23.765	25.294	50.358	12.071	18.564	21.779	14.477	20.343	25.292
38.828	49.408	46.444	61.203	65.812	63.292	27.518	30.611	37.579	32.471	24.081	79.874
39.367	54.615	44.125	65.456	44.158	63.373	42.85	37.926	35.821	32.471	51.156	57.644
39.367	48.068	55.282	52.468	51.478	69.525	34.851	41.109	44.387	29.299	47.967	50.152
41.84	69.453	84.507	73.493	70.83	84.426	42.139	65.17	57.907	48.839	81.017	27.89
35.593	46.473	58.715	49.779	55.047	54.799	38.57	40.44	53.96	28.657	44.253	28.866
23.991	38.753	40.2	40.428	38.8	50.029	29.62	27.599	34.245	25.522	42.198	53.715
23.991	30.27	41.654	32.192	32.04	34.617	28.176	27.599	33.278	17.292	33.103	28.902
26.655	26.656	33.668	32.62	34.642	34.617	20.365	25.472	19.624	16.506	31.633	33.202
41.202	49.784	69.756	61.112	66.695	73.343	34.825	52.816	69.842	31.752	44.661	40.747
47.579	60.068	64.189	75.305	59.678	99.285	46.199	50.532	44.441	31.051	52.476	107.98
36.49	52.152	52.638	73.615	56.45	63.864	40.114	37.727	34.9	41.016	41.545	27.899
36.025	42.099	45.229	59.413	53.697	59.739	34.976	29.13	30.483	51.549	34.621	32.097
44.572	52.474	50.252	73.182	65.405	55.407	57.543	36.895	38.01	43.168	39.465	50.376
33.996	39.646	43.452	64.178	50.156	61.992	32.95	27.569	22.94	35.269	22.753	20.603
29.909	30.688	37.83	38.837	31.226	54.392	24.943	25.407	22.095	34.441	34.645	22.095
29.909	50.528	60.178	62.172	65.684	78.754	41.096	43.146	37.591	40.885	43.853	42.688
32.847	48.549	51.208	62.172	53.528	65.932	34.54	43.465	45.023	31.99	33.761	28.896
30.871	61.128	51.694	69.127	65.333	65.932	47.747	48.8	73.82	49.39	45.825	39.994
35.023	69.113	59.369	89.484	66.073	83.503	46.436	51.952	60.762	47.275	67.322	40.426
39.488	32.898	34.164	47.641	35.134	33.434	28.68	31.628	31.542	25.147	43.801	32.924
50.174	46.375	40.11	70.061	38.198	55.453	30.718	31.628	38.644	35.8	43.801	46.686
36.322	47.144	48.501	53.762	54.619	46.984	28.637	40.567	28.909	29.588	43.348	27.94
37.905	48.829	57.918	61.333	70.113	55.25	42.001	45.661	33.056	47.765	56.377	47.531
42.255	54.068	43.949	72.997	70.356	46.714	47.745	49.294	45.145	57.335	27.696	31.125
39.164	54.655	63.333	77.412	72.851	49.133	45.793	42.307	39.48	47.047	44.277	30.692
32.903	54.655	59.578	61.987	51.545	58.68	39.768	37.509	156.01	35.437	44.431	40.464
30.865	43.283	58.882	47.02	46.868	69.651	35.01	43.597	35.847	32.053	37.447	34.059
16.794	20.947	22.331	28.382	24.901	32.478	14.157	17.779	18.249	14.922	32.924	35.669
17.366	18.373	23.116	19.189	20.795	26.444	13.833	14.21	15.342	10.009	33.672	20.235
25.978	23.187	35.019	23.236	24.834	35.166	22.616	27.909	18.882	12.301	42.484	20.235
78.994	74.298	76.082	91.169	90.246	100.94	48.966	57.228	69.29	46.972	76.095	78.739
59.292	60.624	62.022	75.444	66.955	74.29	48.966	44.939	43.793	38.916	57.715	36.477
40.815	64.403	62.318	76.986	64.006	97.588	53.835	49.774	61.347	45.075	54.999	51.001
23.606	39.772	39.68	49.292	44.591	70.76	22.759	33.116	37.927	27.761	38.594	51.171
46.097	63.86	62.702	88.221	61.099	99.37	96.68	62.341	61.941	54.446	69.031	91.443
36.939	30.394	30.984	33.54	31.805	40.077	17.338	24.127	34.746	28.532	23.201	53.859
37.19	45.949	47.204	52.821	45.303	45.502	25.306	29.119	35.231	32.221	41.529	56.576
36.391	37.795	47.204	62.185	59.807	48.316	26.631	27.651	30.123	33.395	29.062	37.045
34.658	42.582	49.48	46.23	43.339	75.119	38.756	38.089	38.392	21.189	41.233	35.531
33.985	30.311	26.812	45.488	50.401	34.293	20.939	26.234	42.12	40.071	31.505	37.352
30.686	28.984	41.591	49.405	48.77	26.784	17.337	27.455	50.763	30.281	33.963	27.488
46.374	54.519	74.221	78.87	76.928	100.7	51.6	45.609	37.615	45.076	58.355	44.398
51.239	54.39	73.955	66.582	76.928	62.545	51.6	45.609	43.03	36.196	58.355	32.916
41.47	55.107	60.741	78.185	47.006	75.641	49.74	55.059	40.749	36.196	68.822	37.9
53.974	61.121	61.111	77.354	70.628	58.216	37.741	47.738	38.171	44.075	45.608	44.544
47.663	50.498	62.085	60.808	64.516	53.035	36.95	58.603	43.716	39.824	61.609	58.01
28.509	61.237	62.382	60.373	47.544	73.006	31.867	55.752	56.294	36.842	73.776	50.586
34.405	47.734	58.996	47.939	47.544	62.551	34.726	43.855	49.09	35.885	33.988	27.339
38.275	47.729	55.103	61.474	49.796	61.321	33.817	39.69	45.598	32.022	40.035	44.487
53.656	47.815	50.984	70.717	64.701	60.658	37.727	37.782	41.451	46.003	39.267	34.97
53.656	51.273	43.67	66.738	54.545	84.337	47.009	43.471	34.326	60.744	43.928	27.475
33.97	45.464	52.634	74.603	47.546	68.162	32.669	28.254	30.736	39.448	41.88	36.959
38.063	45.464	49.305	75.012	58.533	58.871	36.855	29.826	32.638	39.991	29.65	34.274
38.063	52.31	58.692	75.012	62.602	50.645	43.049	47.11	40.047	39.991	62.638	28.327
25.84	35.904	40.083	61.682	54.767	45.617	24.135	24.725	25.779	40.73	32.778	24.512
27.413	40.976	55.014	64.306	54.767	81.979	32.753	45.602	30.771	40.73	42.481	24.865
33.319	46.198	51.795	62.564	50.914	58.023	38.13	46.622	53.96	40.464	55.751	27.289
40.49	48.543	45.914	55.729	55.37	48.553	35.039	38.826	49.49	38.001	37.675	35.865
38.213	53.466	56.639	64.184	61.926	54.488	45.515	38.427	52.14	37.718	42.321	50.268
32.772	59.896	68.468	100.64	74.073	75.835	46.818	38.427	62.973	49.944	46.64	55.059
44.452	46.898	52.54	70.451	58.157	60.157	40.837	32.94	39.812	48.877	49.493	36.485
52.55	62.867	64.324	72.076	62.439	63.197	54.561	54.16	51.915	54.886	61.234	32.637
40.827	46.126	52.199	61.827	62.311	38.848	42.783	38.487	39.335	48.733	27.767	40.092
55.418	78.197	107.82	67.182	74.885	114.11	77.042	105.26	72.177	48.733	69.428	52.362
59.534	54.888	47.22	71.765	57.184	69.818	38.365	39.059	40.453	46.319	34.873	45.861
33.182	42.809	47.22	53.657	51.931	42.788	31.204	31.519	33.457	41.205	29.209	35.021
24.827	38.601	40.205	53.347	32.937	43.451	32.035	32.725	30.799	32.545	36.764	56.151
47.514	53.383	62.84	52.794	57.334	74.724	45.597	41.127	40.855	42.233	64.447	43.724
28.921	39.884	37.77	52.031	37.309	53.208	26.288	26.82	40.447	40.837	32.311	46.322
36.686	41.154	46.9	68.594	53.51	54.042	29.657	34.778	42.349	44.665	37.01	44.364
33.922	62.434	81.548	89.205	90.152	81.833	40.178	48.723	51.032	45.53	47.52	46.026
27.312	46.703	63.413	67.826	62.401	64.578	33.551	40.14	58.191	42.907	32.721	50.888
26.522	42.393	43.824	50.729	45.186	49.481	27.068	31.504	50.835	37.275	31.434	20.117
52.559	58.61	66.706	67.27	66.371	77.23	45.953	47.309	44.693	41.646	43.932	38.908
38.607	58.61	55.108	83.303	65.122	64.359	45.473	40.769	48.192	50.813	39.605	31.395
35.743	59.916	70.319	71.734	70.202	142.55	36.401	50.742	44.686	53.76	80.965	36.113
56.003	62.342	64.317	69.97	71.21	81.26	69.282	53.935	51.346	51.733	48.909	45.596
37.989	46.424	45.24	67.438	57.589	58.382	35.439	35.721	32.079	50.572	27.198	45.596
25.092	36.338	37.56	54.03	47.578	47.144	29.798	24.272	29.229	37.011	25.749	23.161
46.578	45.237	43.826	75.331	65.952	50.044	37.689	26.56	40.745	39.293	28.845	67.831
30.7	50.042	57.565	83.809	66.983	47.847	37.689	39.369	36.478	37.093	27.552	36.34
30.7	53.909	65.82	69.798	65.233	61.687	37.784	44.552	42.399	42.98	41.808	32.424
46.209	69.722	66.918	76.878	67.513	86.914	54.892	57.052	59.722	48.003	86.037	48.697
57.752	69.722	50.77	91.191	59.925	99.794	54.892	40.024	72.704	48.003	49.43	72.189
28.243	43.39	46.329	53.651	54.624	59.452	40.288	28.197	85.836	37.673	28.123	26.892
37.314	46.105	43.459	50.724	45.444	76.799	31.417	37.045	66.181	37.102	29.691	34.796
40.183	42.501	50.827	67.701	59.614	56.029	30.573	33.651	33.857	44.243	33.022	33.637
53.059	54.451	62.034	70.517	64.755	63.494	38.107	40.557	36.797	43.418	40.099	34.231
40.132	38.938	39.877	68.964	51.846	55.831	23.239	23.077	69.836	35.484	32.426	26.596
24.062	24.191	39.877	43.012	26.498	42.662	23.239	21.484	34.608	27.434	25.505	32.145
35.943	48.572	56.648	55.086	53.067	50.685	40.448	37.424	34.608	32.607	41.436	45.537
32.65	55.571	65.75	53.16	50.035	72.949	30.986	68.838	44.426	30.279	74.838	56.132
57.118	44.59	50.97	64.326	58.359	54.851	30.986	42.436	41.165	36.91	32.884	41.241
41.418	41.425	41.631	50.877	50.677	42.845	25.638	34.183	28.037	34.264	32.884	42.324
34.035	38.468	39.244	48.708	42.139	41.392	37.507	29.368	53.151	36.77	26.55	42.324
42.025	56.411	45.924	60.371	51.182	42.384	50.332	31.845	45.635	59.618	38.836	33.007
36.368	35.636	31.471	46.799	34.872	39.042	31.434	23.925	23.359	32.02	25.73	25.19
34.875	32.934	26.302	48.764	36.316	25.832	30.64	25.044	29.528	35.636	25.006	47.469
41.634	65.1	66.46	79.209	68.302	59.504	57.6	53.388	79.65	43.467	43.234	47.533
42.36	36.44	45.784	54.451	41.462	41.799	26.039	38.206	27.662	31.569	30.824	41.356
30.183	39.42	52.724	48.051	43.522	56.827	27.725	34.218	29.739	23.553	36.565	42.401
30.183	43.702	48.957	60.147	54.346	52.026	33.76	34.218	32.125	29.936	43.625	37.953
55.81	57.272	48.957	57.658	59.879	52.852	52.346	44.834	39.447	54.747	49.643	35.184
47.331	34.947	42.698	35.855	34.123	30.88	39.578	34.311	23.597	28.143	34.602	23.692
37.004	619.73	940.14	455.65	543.98	710.81	599.64	804.4	514.75	145.96	891.31	381.79
36.834	46.336	54.072	58.36	52.41	40	38.92	37.545	36.079	36.478	42.864	26.414
29.027	28.021	39.055	41.16	41.533	30.203	20.192	29.717	54.105	22.553	28.319	25.098
22.701	33.222	46.678	46.219	38.062	70.962	21.256	28.141	33.956	28.178	31.04	25.098
60.731	61.893	64.185	82.912	74.675	65.307	50.71	46.635	44.095	46.346	49.7	35.195
45.36	53.947	45.835	64.445	56.559	63.931	24.959	33.331	40.837	53.638	31.298	70.61
37.557	37.878	44.569	58.468	51.202	57.878	21.117	29.43	32.241	34.876	27.946	29.63
49.905	45.998	62.981	50.493	61.344	90.666	41.998	46.166	36.873	27.576	72.723	31.798
49.905	30.992	28.723	44.529	40.857	46.969	29.755	27.301	20.563	28.021	31.534	15.491
180.96	32.278	38.031	41.131	45.227	46.56	23.134	20.172	19.412	23.627	31.131	23.392
186.86	30.816	25.471	38.528	35.066	35.018	20.682	17.756	19.373	23.464	28.129	29.868
63.917	30.137	26.483	43.611	35.347	35.53	19.646	21.302	25.59	24.762	28.129	24.226
42.831	32.768	38.758	43.25	41.276	51.84	21.623	27.624	91.229	26.235	27.444	23.252
27.442	24.275	25.994	26.802	24.761	27.036	21.623	25.152	22.506	23.073	26.892	13.941
34.009	282.14	400.55	234.26	251.22	354.36	268.02	340.43	313.32	84.732	366.17	165.61
53.823	56.235	60.096	74.691	70.746	52.055	39.039	41.625	52.302	42.254	39.024	38.358
36.239	28.504	46.212	32.373	23.392	40.061	26.286	40.214	32.709	13.554	35.588	21.971
37.996	34.538	52.414	32.373	34.748	42.29	27.02	40.899	27.274	10.301	55.555	25.995
31.324	39.551	43.519	51.639	40.025	57.188	27.573	36.368	48.74	32.301	34.306	25.995
16.477	18.838	23.927	21.191	20.631	18.913	16.802	15.763	18.876	13.319	20.84	21.946
42.585	37.61	39.273	59.228	49.644	32.721	32.82	28.158	30.95	33.038	31.4	29.514
38.936	38.425	49.586	60.603	47.161	51.01	29.013	33.503	30.097	32.112	33.093	37.432
65.908	43.397	57.15	67.213	47.897	59.23	47.101	41.597	34.756	35.568	44.249	30.526
50.858	63.189	73.457	71.231	65.423	68.768	48.461	49.935	53.36	35.403	46.088	47.06
37.333	37.647	45.055	49.513	34.28	39.785	33.257	35.518	30.16	33.26	32.876	28
33.214	29.795	34.566	41.437	39.392	38.884	24.566	25.595	23.269	27.679	20.613	21.929
23.221	37.205	50.491	46.404	51.098	45.091	29.927	40.889	34.025	38.559	37.836	24.014
27.959	33.364	30.832	56.334	44.145	38.063	24.06	21.377	25.76	35.563	29.678	30.473
43.521	37.873	42.248	56.173	45.69	51.592	27.135	29.883	29.599	35.563	29.678	30.473
30.698	33.209	36.646	54.025	36.947	40.283	24.819	29.291	28.584	21.85	35.48	19.997
31.478	30.624	54.311	48.322	45	36.858	24.819	40.328	28.489	31.806	37.964	23.344
56.54	54.958	63.411	62.394	68.185	49.045	47.515	48.692	40.371	33.476	45.01	38.796
52.456	49.836	66.911	55.088	59.799	62.774	41.75	44.283	34.095	30.111	45.01	34.935
67.642	63.775	83.872	84.932	87.904	93.249	46.587	48.352	47.667	41.022	58.8	37.871
46.133	51.24	66.195	49.377	48.531	50.936	39.524	52.181	38.082	20.671	59.384	49.778
43.126	33.061	43.707	33.127	36.724	32.825	28.075	33.806	27.577	21.728	38.315	33.972
40.08	62.159	81.166	87.287	81.034	64.622	41.277	54.245	43.298	59.01	44.224	58.224
41.204	57.188	74.864	59.676	62.316	61.942	41.277	58.069	44.54	33.557	46.111	33.279
48.837	55.937	74.744	69.624	69.463	61.94	39.567	48.064	42.307	43.243	41.9	42.837
48.091	52.953	74.744	59.637	60.197	60.634	37.88	47.078	41.323	29.085	41.9	43.968
47.829	33.471	52.818	40.744	38.814	60.634	21.878	32.918	27.213	22.692	30.033	24.342
35.074	28.206	34.266	40.744	34.864	30.777	21.878	26.514	24.089	19.869	23.628	19.906
44.177	60.084	78.656	80.139	81.555	65.963	37.648	54.013	44.877	42.862	40.662	31.218
37.164	42.948	58.146	52.257	53.309	50.905	27.742	44.388	33.933	32.379	29.094	28.772
30.518	29.149	37.543	44.027	46.016	43.018	21.981	29.178	25.903	30.696	16.998	28.709
37.907	51.329	69.893	57.039	56.641	48.352	37.65	47.859	43.849	31.519	45.987	34.878
34.941	27.872	38.973	35.991	33.647	39.53	27.202	36.681	24.458	24.301	31.938	29.624
41.905	56.108	70.687	59.333	62.632	62.868	36.144	54.419	49.527	43.744	32.088	32.093
35.048	46.956	93.897	63.447	66.027	102.19	34.691	43.768	54.959	30.151	45.984	40.301
32.368	33.307	45.796	43.622	42.934	52.191	27.196	29.268	31.019	17.554	39.31	30.62
33.249	32.365	44.539	30.986	32.819	40.265	20.739	38.55	62.661	14.347	31.358	36.021
38.319	46.23	48.637	52.793	47	41.86	31.219	39.575	61.05	27.26	43.241	33.835
38.315	38.696	45.514	47.775	47	60.711	32.581	35.444	39.765	22.342	37.899	22.721
36.284	33.805	40.184	44.772	37.236	48.022	30.995	29.295	25.993	22.08	29.732	25.518
49.747	39.251	46.086	44.947	37.236	41.821	33.487	42.417	29.993	20.978	38.323	42.193
31.428	30.755	36.477	34.518	35.345	41.586	27.082	31.463	28.379	18.692	41.927	27.414
34.48	27.34	34.43	34.595	28.53	36.762	15.585	23.503	24.322	18.692	18.909	12.08
34.48	30.557	34.967	31.835	33.122	28.329	23.882	26.413	26.181	18.12	22.51	20.423
36.057	29.328	31.284	30.142	27.801	36.774	22.128	28.382	117.72	23.684	16.266	19.211
39.897	38.168	41.084	39.364	33.981	36.774	34.868	31.189	36.305	15.934	39.279	40.234
32.177	35.407	47.293	40.973	40.174	54.233	28.898	29.167	23.322	15.229	36.864	24.851
63.362	60.237	80.081	61.241	55.981	67.33	55.15	64.952	49.763	21.041	74.223	47.412
23.683	37.534	36.036	44.567	42.145	35.389	34.062	29.53	27.372	33.161	31.533	32.585
27.858	25.854	30.723	36.817	33.245	30.693	17.426	20.772	25.262	21.835	17.568	13.253
27.858	27.835	39.108	38.622	35.75	39.635	23.942	25.511	86.682	20.038	26.658	19.095
50.932	32.156	40.6	44.083	35.829	40.048	28.086	32.468	50.053	24.322	36.845	19.095
45.211	38.104	52.383	46.164	41.019	47.77	30.36	34.051	34.324	22.169	43.709	28.508
43.517	39.081	57.047	55.67	58.432	47.77	30.36	32.976	29.173	27.284	36.738	25.946
31.683	34.611	41.912	47.631	48.594	49.034	33.195	36.519	27.082	21.811	33.91	24.565
45.098	23.29	29.049	30.025	25.274	32.225	23.187	24.969	17.259	15.018	24.11	14.617
31.555	21.074	29.049	27.214	24.888	23.156	21.542	22.996	16.109	12.681	24.11	14.617
19.653	21.298	22.764	30.011	23.71	17.893	22.79	20.961	24.122	15.258	21.91	25.562
32.219	27.162	34.101	35.362	32.452	30.594	22.441	24.093	18.999	14.801	37.725	17.231
28.218	25.519	37.213	28.807	28.748	32.503	20.192	28.316	27.925	13.216	25.252	18.98
31.477	26.489	33.534	27.328	31.185	28.912	19.881	28.639	40.171	14.016	23.435	14.417
20.562	14.62	18.552	21.56	21.95	13.718	13.369	13.423	9.3834	11.695	16.09	13.255
18.241	29.699	33.758	34.686	32.392	22.277	25.596	28.347	47.362	19.456	25.02	21.713
55.323	64.156	90.512	68.95	72.367	70.863	58.704	63.897	48.813	26.051	79.503	36.315
33.636	32.417	45.833	32.981	36.572	36.824	30.731	37.435	69.257	14.131	43.035	17.816
24.587	29.315	36.171	31.736	32.924	33.495	25.151	31.452	22.403	17.605	30.427	17.432
42.468	36.703	46.907	36.127	34.757	42.218	28.425	45.38	30.639	18.968	46.05	29.418
42.468	31.841	46.892	29.458	34.557	42.218	26.972	34.521	27.196	19.146	41.003	29.418
44.845	51.198	65.61	44.366	43.85	52.879	39.865	62.373	53.039	27.856	54.923	39.629
42.718	29.189	38.47	30.221	29.322	33.36	24.207	28.484	25.622	12.832	35.952	36.046
37.167	32.126	43.811	29.202	31.032	33.538	29.541	38.184	29.209	15.54	35.952	26.732
49.076	45.262	55.132	48.017	47.002	52.662	36.096	52.325	55.593	30.672	43.638	28.756
33.127	27.807	33.02	27.188	29.1	34.832	19.516	24.83	19.959	11.414	30.351	28.756
36.876	33.948	44.645	30.965	30.403	42.208	28.895	35.936	35.843	13.77	39.81	40.87
39.678	33.948	44.378	30.965	30.403	38.901	28.895	35.936	27.349	15.519	38.42	33.149
27.193	24.715	35.439	27.542	28.789	29.744	22.353	33.242	19.718	16.081	28.793	14.108
28.689	22.408	28.665	26.446	25.306	25.627	18.407	20.694	25.179	15.006	16.364	17.781
36.464	24.202	31.393	32.022	29.21	23.424	19.538	26.911	28.779	15.006	19.45	15.948
26.356	23.01	23.384	17.426	16.827	28.479	21.811	22.497	24.796	15.613	21.323	28.473
26.356	23.01	30.08	21.951	22.599	28.479	24.698	27.808	24.796	19.223	23.192	29.926
16.041	16.284	20.203	21.951	22.599	16.94	12.94	16.811	13.636	17.789	17.039	11.917
41.502	26.094	36.311	36.432	27.417	28.76	17.734	26.76	26.155	14.288	48.885	17.611
24.482	25.962	32.429	25.448	24.921	27.406	22.324	19.612	98.284	14.858	23.382	15.697
26.811	20.766	31.413	21.534	21.042	26.9	22.395	22.31	24.417	9.4275	27.103	16.22
35.114	26.526	38.617	25.715	26.102	45.618	22.771	29.672	24.267	10.451	36.354	21.471
38.842	32.059	43.591	39.841	29.854	45.618	29.022	36.682	37.668	13.757	36.354	21.471
24.621	20.611	29.713	22.411	20.061	39.215	21.889	27.476	23.737	8.5651	30.835	19.073
26.619	20.837	26.183	21.815	18.381	33.293	19.881	25.909	24.262	12.7	32.079	28.878
34.071	32.397	38.821	28.398	30.907	38.475	29.086	32.77	28.783	22.231	37.856	36.936
27.065	32.631	45.919	26.304	27.163	37.07	30.932	38.312	34.021	15.424	34.325	24.887
27.065	27.9	26.726	21.947	24.271	23.386	29.695	31.077	25.05	12.219	24.149	17.247
12.114	25.706	30.582	35.597	33.155	29.706	16.446	17.482	27.84	22.287	16.966	13.22
19.845	30.517	36.565	27.649	23.79	30.622	24.079	29.984	23.765	16.082	36.232	15.954
42.942	41.57	47.612	37.545	33.569	39.759	39.613	36.681	37.95	26.276	38.588	30.257
28.029	34.142	31.7	35.436	26.484	45.961	36.888	32.277	29.684	24.317	29.282	20.722
35.17	31.687	29.336	46.969	31.181	47.309	26.271	28.406	24.738	24.324	32.444	30.592
46.089	68.477	71.008	77.928	67.088	115.08	52.112	64.066	77.233	31.029	62.456	46.943
45.173	58.483	71.008	75.983	61.648	73.874	48.926	59.835	45.202	35.692	48.821	37.217
29.618	31.527	34.7	28.41	29.336	43.968	26.264	31.334	29.226	23.688	22.354	22.697
34.707	41.028	42.786	36.316	36.891	62.488	44.2	36.066	29.226	30.958	51.872	32.324
26.895	31.667	38.548	37.843	36.891	39.723	36.153	35.993	32.282	26.529	35.804	26.366
30.123	31.667	38.342	41.003	37.928	45.78	24.368	26.329	122.33	28.953	25.857	24.582
21.699	21.219	22.982	28.414	23.931	23.241	16.776	17.006	21.992	18.103	16.282	16.933
30.97	37.004	39.547	56.099	51.481	109.73	26.902	33.598	21.547	26.276	35.444	21.251
80.919	73.688	83.721	89.574	96.637	82.726	68.367	65.402	59.453	53.564	66.827	45.716
25.793	35.372	39.997	41.634	42.573	33.173	25.783	25.485	28.619	31.734	29.92	22.692
30.224	41.625	47.268	51.354	45.729	46.676	36.083	41.496	28.619	36.07	32.813	66.409
42.692	38.144	49.903	39.296	37.164	40.585	29.381	37.036	30.986	24.711	39.218	29.846
24.673	38.144	37.708	34.563	24.126	45.279	28.051	37.036	31.588	21.053	39.218	42.278
17.202	28.611	33.254	47.277	28.901	37.725	24.733	23.769	27.772	26.36	22.405	24.261
31.43	27.216	27.562	51.341	41.511	29.169	21.434	22.76	26.614	26.89	16.355	21.537
28.923	26.031	33.61	34.797	30.633	47.098	21.434	21.977	38.828	34.534	15.125	22.993
31.198	41.169	45.265	52.407	40.617	34.375	33.411	37.664	38.828	33.073	31.477	28.073
37.792	33.904	45.418	43.433	41.895	34.375	28.009	28.317	35.133	23.324	22.505	23.131
42.378	37.026	53.108	41.809	39.313	45.264	32.342	40.334	49.045	16.948	49.463	31.966
49.127	26.1	36.468	37.396	40.003	36.535	22.744	23.966	19.057	13.056	32.711	18.244
35.69	27.1	35.39	33.21	29.226	30.802	19.272	27.907	24.474	13.788	24.28	19.377
34.01	23.987	29.822	33.018	28.45	28.504	16.407	19.711	44.187	23.795	20.36	45.76
19.107	22.907	23.912	24.382	22.18	36.119	16.407	19.027	19.394	16.417	38.268	26.594
26.025	41.223	66.666	55.87	53.907	66.965	30.187	42.82	35.135	22.599	38.585	30.361
25.127	23.951	38.009	38.012	36.403	56.352	15.519	25.28	23.875	23.327	26.476	24.081
44.724	43.564	54.946	56.013	48.407	55.032	22.276	40.693	48.532	29.573	53.414	27.276
33.066	46.086	38.182	41.405	37.302	41.784	20.29	24.928	457.81	21.882	28.148	14.902
47.386	34.905	48.674	43.508	43.321	40.394	24.497	32.302	24.409	26.852	28.226	22.391
32.86	34.905	49.248	44.977	43.321	51.41	24.497	32.302	24.409	24.037	31.403	22.618
31.955	34.346	45.294	38.095	37.715	41.027	28.649	36.656	34.716	19.453	28.864	25.39
31.315	36.533	51.022	44.439	45.869	41.119	32.175	39.779	108.81	24.752	44.574	23.211
44.613	38.669	51.022	45.327	45.176	42.05	36.257	39.779	31.968	26.781	55.414	26.673
35.511	25.413	37.736	36.687	31.636	35.557	15.504	29.561	25.124	22.117	25.925	14.739
44.119	43.004	45	59.138	54.561	48.347	28.05	38.197	30.669	34.633	31.29	27.848
48.427	40.895	49.869	55.622	53.148	40.916	30.558	42.297	44.511	34.633	50.163	27.625
42.03	26.933	38.233	43.228	42.419	32.982	20.651	24.268	23.407	26.674	21.254	11.11
49.763	31.511	39.395	43.228	40.679	36.676	26.734	27.843	35.706	26.674	23.565	17.014
26.151	25.714	32.53	31.983	30.042	36.823	21.398	24.596	63.091	18.133	21.561	20.448
59.056	40.078	53.579	48.372	45.271	46.218	34.779	39.315	75.605	26.706	32.843	24.427
22.857	18.04	20.462	24.254	17.109	19.971	13.439	18.428	24.53	14.613	20.949	24.427
29.528	28.378	33.591	29.003	33.049	32.796	24.397	30.348	23.974	19.8	33.436	16.824
40.845	36.246	46.589	44.145	40.881	34.981	26.804	30.348	29.133	33.846	34.723	31.936
36.598	25.999	33.372	29.15	29.22	33.937	16.525	25.616	47.954	16.188	26.194	13.757
42.053	28.798	42.063	40.567	45.448	33.772	20.743	25.616	31.88	25.722	26.194	16.082
48.754	44.472	52.884	52.931	44.732	42.024	28.315	31.85	31.88	18.307	61.083	27.008
32.209	45.794	60.34	52.931	44.329	60.296	28.293	49.132	46.597	19.519	61.083	40.097
15.885	25.659	33.139	29.226	31.985	27.693	21.066	19.549	33.483	13.732	29.036	17.418
44.093	39.163	52.71	48.89	46.449	43.742	34.387	44.166	30.558	28.849	43.533	29.816
311.69	43.915	61.731	53.781	54.381	50.555	36.79	49.864	31.839	27.057	40.959	26.286
25.071	31.866	36.763	41.562	35.532	32.3	21.895	28.512	26.682	20.039	30.702	20.694
73.407	87.684	94.454	86.474	92.44	81.576	74.88	81.077	69.244	84.198	83.187	47.802
78.064	90.984	94.454	90.952	95.56	75.743	87.533	81.077	69.244	84.198	103.83	58.408
61.658	72.683	83.147	76.88	88.689	71.609	62.727	65.981	48.55	47.665	103.95	38.925
106.06	134.78	117.75	147.18	160.01	102.67	126.85	109.44	98.182	126.93	124.01	90.236
69.717	101.04	89.454	97.548	95.764	84.254	89.502	92.299	94.916	126.38	88.215	73.189
70.76	44.706	48.844	59.437	59.821	40.604	41.048	47.319	41.814	54.254	38.369	36.703
118.83	48.142	53.326	52.302	55.413	47.1	61.175	62.195	65.08	63.027	50.499	36.703
122.59	56.815	75.02	55.103	57.642	83.109	74.015	78.67	65.08	63.027	78.658	50.005
147.29	141.06	147.72	146.51	145.82	153.79	153.82	138.34	127.09	155.66	152.63	91.651
119.59	148.26	130.24	142.12	155.91	103.29	138.24	133.13	135.03	145.73	139.08	101.75
104.74	127.88	145.65	142.12	155.91	120.73	119.58	125.69	119.97	105.61	145.43	73.693
79.959	114.75	104.72	145.39	142.93	87.32	88.03	103.37	121.74	143.06	82.933	60.543
93.109	64.399	72.116	87.706	112.32	62.444	70.343	70.287	66.665	85.565	121.09	52.78
86.361	120.91	145.4	142.51	151.16	121.62	99.864	99.949	98.483	85.206	111.49	75.857
95.221	52.047	60.373	68.079	62.99	76.204	65.813	78.009	62.299	49.655	98.709	42.825
118.16	99.075	111.56	118.5	117.75	89.518	94.324	90.551	87.62	96.694	89.929	68.936
163.82	112.42	122.57	127.17	114.37	106.1	119.4	107.69	109.79	155.86	96.996	75.902
208.25	156.67	154.13	122.6	121.92	118.39	163.46	161.8	140.51	186.62	143.32	127.36
104.48	93.577	109	103.01	85.083	100.07	78.6	89.211	108.03	73.775	71.389	74.949
115.94	67.489	93.202	69.225	85.083	88.547	58.132	86.743	63.441	50.177	95.09	65.994
119.82	110.74	117.67	118.04	131.55	117.2	122.11	122.65	129.18	111.81	151.46	93.572
114.07	100.67	93.885	87.172	93.115	76.037	137.85	92.908	89.658	115.37	113.89	79.374
113.32	72.335	93.202	96.037	100.8	76.144	61.672	64.099	70.173	66.631	71.476	55.114
107.08	74.398	92.858	78.707	89.542	156.9	72.221	77.766	62.069	41.732	97.125	49.68
153.16	78.995	92.858	120.9	116.63	188	89.871	86.839	71.236	104.12	99.994	72.936
104.75	85.741	106.11	125.5	106.63	98.139	89.871	86.839	71.236	80.31	99.994	63.596
70.039	104.85	83.43	91.611	82.339	85.855	84.669	70.17	81.957	100.28	65.053	69.319
76.692	116.85	110.37	103.13	88.011	100.43	105.7	107.36	116.91	157.08	84.249	78.122
107.73	129.8	128.88	133.95	132.78	137.83	131.43	135.09	110.5	105.99	123.68	88.58
77.767	58.654	64.243	66.426	72.648	77.411	76.074	64.682	59.787	78.095	68.193	33.428
78.943	50.235	52.494	52.461	48.582	54.391	58.026	65.133	49.319	69.007	49.917	49.284
78.943	63.206	66.841	56.3	76.512	71.582	73.779	86.396	65.262	75.776	109.41	55.196
117.09	63.206	62.472	58.026	74.532	50.942	83.85	69.621	60.609	80.867	88.324	55.196
80.656	101.97	68.846	65.555	55.623	66.296	118.73	114.08	108.86	151.61	87.156	76.256
115.56	94.056	84.458	56.32	55.623	75.142	104.13	105.22	243.31	106.44	105.8	74.743
101.57	112.4	99.757	130.39	125.59	91.578	107.62	105.22	169.24	110.84	112.4	74.743
173.71	145.85	131.12	150.4	156.82	119.24	163.78	181.64	147.21	130.83	174.73	113.9
135.02	109.16	96.568	90.009	87.189	97.639	113.97	121.63	114.93	116.65	122.08	79.687
32.699	58.545	60.716	67.883	68.513	51.019	63.032	67.155	95.147	120.93	54.954	50.975
95.847	116.36	99.451	100.69	110.01	78.782	147.13	120.84	164.8	181.77	99.066	97.269
132.89	108.8	104.15	147.32	136.3	88.8	114.24	122.61	155.53	148.39	114.57	73.88
123.61	127.33	128.89	139.87	134.75	110.43	125.43	122.61	101.27	137.78	154.75	120.62
221.09	153.03	161.72	165.84	164.44	135.86	150.23	156.88	131.2	132.7	203.71	107.31
95.637	112.83	130.83	123.2	131.59	101.07	112.83	99.268	92.555	99.41	163.57	80.849
137.46	160.68	171.78	141.78	146.57	162.03	166.34	181.13	157.12	228.88	167.59	104.51
137.46	153.75	124.44	120.04	110.87	106.76	186.57	122.05	143.95	163.37	113.85	110.74
82.969	149.44	148.99	243.73	241.86	114.62	124.37	102.13	86.957	119.12	187.78	68.045
94.566	93.317	101.75	87.87	85.274	82.624	90.891	100.06	73.829	72.163	111.64	61.058
94.566	96.4	91.256	79.714	62.353	78.53	94.077	119.66	110.13	155.82	99.99	70.526
78.135	98.434	84.534	113.37	103.33	75.928	101.82	102.9	117.49	156.05	89.82	80.118
151.53	140.69	116.36	125.22	128.1	110.88	155.45	140.27	139.13	194.73	143.47	115.6
123.58	134.64	116.38	133.2	121.31	112.57	135.4	140.7	121.16	170.77	143.82	95.111
225.3	134.64	157.06	139.55	154.31	139.49	135.4	170.62	139.55	117.94	136.3	100.26
157.31	113.18	114.58	119.99	130.79	92.339	109.04	101.89	77.467	80.188	119.55	64.267
104.07	102.43	86.746	77.923	64.875	74.473	144.36	129.21	111.22	104.16	102.17	73.191
121.46	107	118.91	111.74	111.97	85.476	75.316	93.989	77.225	69.126	144.7	53.805
166.17	167.04	151.06	141.6	162.57	129.34	161.37	145.35	127.13	134.06	184.71	110.3
112.45	148.57	118.52	107.08	111.56	92.947	163.94	160.94	131.33	191.19	178.76	95.573
54.83	53.893	57.323	70.228	72.057	79.398	43.739	45.776	41.238	45.614	47.214	29.005
105.31	76.83	91.231	111.66	124.37	116.85	62.955	82.634	83.718	76.134	81.949	40.766
77.172	60.09	82.12	111.66	124.37	116.85	61.4	73.02	86.198	78.499	68.655	44.587
63.982	89.299	66.451	80.965	80.483	58.8	90.763	79.606	89.651	129.33	78.61	55.513
151.57	102.53	86.282	86.956	89.172	91.238	119.54	115.84	106.02	136.12	96.836	92.696
105.3	111.61	83.146	143.36	147.04	110	103.17	98.636	103.8	150.83	130.93	57.696
126.42	187.68	160.05	189.14	170.24	153.8	150.69	141.81	146.53	175.75	153.4	102.15
130.46	135.42	101.72	82.712	83.741	122.64	147.29	167.28	157.29	160.9	147.38	102.15
89.682	87.743	64.411	82.712	71.459	66.193	110.97	89.338	101.74	115.11	107.18	66.034
74.159	87.743	71.36	91.623	86.208	61.256	110.97	91.399	85.754	115.11	90.279	66.034
118.9	179.39	168.82	157.51	155.73	156.32	187.3	188.59	225.48	191.47	185.14	116.81
179.36	151.71	174.53	150.38	155.41	145.26	158.09	165.95	138.99	135.01	170.78	102.81
125.9	115.17	96.236	75.854	73.157	89	138.93	159.16	138.99	127.14	90.299	102.81
91.734	78.642	69.908	95.39	99.925	66.767	78.277	82.883	75.741	91.014	81.515	58.016
141.54	158.54	145.68	155.59	149.24	130.23	144.95	127.29	215.48	159.51	129.4	123.78
74.243	79.95	72.931	67.07	71.023	65.046	95.637	98.925	99.949	98.592	97.062	73.19
131.87	138.79	159.58	129.63	136.28	138.33	137.82	191.65	140.14	110.3	153.64	98.207
217.87	254.86	253.29	278.84	293.11	206.14	247.81	264.25	221.07	232.16	273.15	153.42
194.93	253.1	223.76	221.28	223.11	193.26	237.94	264.25	250.33	237.94	204.71	151.47
176.86	150.74	159.94	158.56	125.94	143.43	150.83	192.64	142.89	185.88	146.78	120.03
138.49	130.79	126.23	145.09	139.97	120.36	125.55	159.87	127.79	114.28	146.78	81.993
85.39	93.245	93.574	128.73	119.02	95.955	81.519	94.569	75.92	102.55	106.5	58.63
145.55	145.43	131.35	129.87	119.02	123.51	145.74	124.3	118.36	134.81	149.84	91.601
112.94	108.85	80.179	80.4	72.509	79.736	129.52	125.77	116.6	141.26	120.04	82.971
93.544	85.357	101.95	87.922	81.006	93.873	86.468	119.11	96.456	83.657	90.451	61.144
129.07	93.888	101.95	72.536	81.811	100.66	92.23	110.3	95.448	82.675	101.87	63.986
214.64	168.97	188.92	142.59	161.49	185.02	171.69	145.86	129.54	146.66	233.28	101.71
98.328	100.28	79.866	67.189	72.934	78.92	121.4	115.95	102.33	124.62	145.36	75.904
159.27	176.86	155.51	109.61	114.66	134.07	166.15	168.8	149.24	168.83	203.07	105.08
[truncated: 41,201 more rows]
