# Supplementary material for: Global sleep homeostasis reflects temporally and spatially integrated local cortical neuronal activity
Source: eLife. 2020 Jul 2;9:e54148. doi: 10.7554/eLife.54148 (PMC7332296; doi:10.7554/eLife.54148)
Supplement: Figure 1—source data 1. [file elife-54148-fig1-data1.zip › Figure 1/Slow Wave Activity/Slow-Wave-Activity-Mouse-5.csv]

Frontal EEG	Mean LFP	LFP 1	LFP 2	LFP 3	LFP 4	LFP 5	LFP 6	LFP 7	LFP 8	LFP 9	LFP 10	LFP 11	LFP 12
93.896	64.001	130.99	105.4	115.6	96.92	105.96	97.128	114.13	79.407	74.238	74.631	66.671	87.188
113.93	135.7	151.29	145.12	160.85	146.77	171.42	137.9	162.18	101.65	116.39	125	149.31	133.29
152.67	103.52	144.08	177.36	160.01	139.06	202.41	169.41	227.35	117.61	116.39	119.35	149.31	111.19
111.12	112.78	141.87	116.89	128.11	109.22	115.47	118.9	127.87	119.85	115.12	132.2	120.43	83.983
78.85	179.32	231.54	224.44	244.79	213.5	179.93	191.18	132.31	132.98	142.94	118.04	114.89	88.089
103.97	233.92	231.54	211.48	244.79	213.5	231.89	188.57	200.65	167.84	196.96	241.69	173.73	158.82
212.24	228.53	188.62	214.67	208.03	188.78	279.83	219.31	280.91	167.84	194.69	232.37	167.38	158.82
172.53	116.88	121.22	91.62	119.69	113.38	108.92	115.31	89.879	119.57	129.73	101.29	129.07	95.683
121.65	175.56	167.59	89.679	156.24	134.27	83.772	114.48	77.064	200.03	188.29	193.24	196.26	164.87
144.27	256.84	182.79	141.09	195.43	188.27	188.39	141.41	176.74	242.52	211.21	227.22	225.83	259.84
73.895	171.65	111.45	105.99	133.06	161.3	113.34	129.94	136.64	179.56	199.53	129.75	209.77	168.43
135.42	173.43	183.41	126.19	173.7	169.67	156.31	124.57	174.11	152.68	163.05	176.51	136.83	129.87
87.496	147.33	152.47	125.26	132.72	131.7	164.51	117.64	160	127.82	145.8	176.51	160.64	129.87
162.75	173.99	185.49	173.97	195.08	189.13	173.87	179.49	160	151	183.25	213.7	191.55	204.51
115.81	213.94	251.26	173.97	227.41	190.18	228.17	179.49	223.7	152.58	145.66	233.23	121.08	232.53
61.809	169.59	150.86	113.22	148.5	121.92	119.69	111.23	119.98	154.51	169.12	187.15	138.31	231.03
73.224	88.214	93.634	69.099	76.949	85.69	46.88	78.29	43.533	105.24	105.88	99.948	148.25	114.33
145.27	202.93	243.49	156.62	240.21	216.04	188.69	181.11	166.17	176.47	173.74	196.01	152.83	218.84
111.15	124.79	164.72	114.01	154.43	128.74	107.16	115.02	106.85	110.85	110.2	113.72	110.45	136.86
73.417	94.441	77.234	114.01	97.398	108.74	89.069	115.02	98.496	67.357	72.162	82.718	85.915	85.739
101.99	120.78	107.75	119.6	99.634	103.16	72.2	119.3	62.825	149.51	133.15	110.45	163.39	91.952
97.813	164.92	162.83	157.41	171.96	164.77	136.06	175.01	124.32	179.91	158.52	102.55	162.38	80.003
156.39	111.43	213.51	128.36	196.58	158.39	114.48	139.27	110.19	112.25	129.41	119.67	117.87	189.86
144.09	176.79	263.6	166.59	234.44	166.16	180.29	192.54	162.4	146.58	148.17	176.16	158.79	205.33
107.32	163.02	203.53	194.74	191.62	166.16	205.75	198.2	172.11	216.48	195.8	182.2	175.51	152.14
123.08	130.07	149.1	83.839	135.46	121.36	61.842	89.771	66.187	172.14	188.42	144.73	158.7	119.48
130.66	174.52	175.11	185.33	178.71	153.81	178.05	180.82	184.37	130.19	156.72	191.98	146.22	147.27
115.2	128.8	178.4	144.37	168.59	150.86	155.55	180.82	167.94	122.67	120.17	132.41	132.93	137.68
117.17	107.11	80.029	73.452	93.724	98.72	151.04	61.425	149.03	158.68	139.29	147.52	133.17	139.79
132.01	133.19	124.76	158.67	130.44	140.58	126.36	135.58	122.91	125.68	126.94	99.509	120.41	80.386
102.93	57.493	94.668	52.807	68.773	69.995	75.304	53.975	86.757	64.522	67.849	42.498	72.503	45.787
137.71	137.88	179.3	127.2	150.31	134.61	135.86	107.97	121.9	108.39	123.44	113.43	146.39	73.198
139.88	219.37	216.78	139.14	188.89	186.78	206.05	128.24	187.98	237.23	210.92	254.06	184.78	255.45
129.21	136.21	111.33	92.709	99.898	110.13	81.572	91.914	90.218	124.5	137.48	147.06	135.58	154.21
101.2	125.56	122.77	105.62	134.02	126.08	71.091	113.48	86.435	170.64	176.21	154.51	154.38	127.67
175.85	125.06	188.53	131.52	169.13	133.69	84.259	133.03	80.866	149.99	160.5	197.87	146.62	176.36
182.06	186.91	172.09	214.81	179.76	203.46	182.28	196.44	174.14	154.67	175.3	143.52	144.71	119.49
118.89	148.48	151.7	167.1	174.38	147	193.74	161.69	147.79	122.87	100.8	132.42	87.124	149.04
115.09	114.82	120.07	115.3	118.36	116.65	101.87	113.19	109.15	119.56	121.8	101.85	99.786	98.449
96.948	110.88	168.92	81.14	117.74	101.1	109.9	85.313	108.95	101.84	137.57	86.797	97.546	102.39
89.181	155.27	142.02	135.35	147.08	143.44	149.75	134.99	133.79	138.8	136.91	162.51	122.73	144.02
116.35	212.82	241.24	140.63	218.74	190.76	147.68	145.41	145.79	157.05	210.57	177.79	153.7	191.89
159.6	117.72	147.64	111.27	138.53	145.37	120.3	130.66	109.93	142.8	175.26	159.31	151.23	152.21
218.62	158.48	230.6	193	220.81	194.97	213.39	189.65	211.77	142.8	179.63	196.64	151.23	190.99
148.84	158.48	230.6	175.04	217.29	194.97	244.48	151.45	239.36	145.16	149.91	232.63	147.6	215.46
126.97	205.83	145.36	158.01	157.06	151.02	229.39	151.61	232.99	170.16	185.84	205.03	169.04	221.67
148.48	120.03	119.41	127.14	128.34	122.16	148.14	111.78	177.52	131.81	152.86	182.5	127.46	177.93
217.24	184.41	224.41	97.365	200.15	156.31	58.715	124.87	60.859	201.27	223.33	153.08	217.12	134.9
109.74	115.67	148.44	100.84	127.71	115.88	114.81	96.026	101.75	99.154	135.98	102.54	110.26	107.2
128.96	172.16	199.6	108.53	194.3	169.01	118.15	93.307	107.48	183.06	184.46	164.17	174.41	200.82
142.17	215.98	235.76	170.59	238.68	206.5	232.84	178.24	231.06	174.9	219.53	180.78	176.6	192.56
186.41	160.14	196.22	144.91	184.07	175.99	105.15	149.72	100.62	142.78	172.16	153.73	160.56	135.02
98.185	133.21	143.48	145.68	166.1	158.29	78.18	108.6	76.745	178.26	153.1	107.4	169.66	86.999
98.185	103.59	127.78	64.177	95.048	87.086	73	52.632	81.346	137.7	134.16	101.14	113.13	114.13
45.357	99.901	89.33	57.164	82.496	82.737	63.43	61.545	71.049	124.71	129.83	98.261	111.04	114.13
101.39	73.087	57.64	61.779	54.556	58.141	59.389	61.545	71.049	77.227	88.804	78.08	93.604	111.46
213.46	99.27	145.3	68.043	100.27	108.82	146.97	77.532	154.54	110.86	92.224	118.2	89.069	139.51
204.68	206.89	219.02	99.101	182.59	173.82	214.29	107.05	211.84	180.68	212.98	210.77	181.79	271.11
195.04	206.89	247.61	180.53	215.57	218.81	214.29	173.39	211.84	180.68	212.98	210.77	168.04	276.82
119.36	147.14	107.08	107.25	123.56	119.93	234.23	109.42	194.41	145.45	159.74	163.29	171.99	206.25
186.25	203.96	195.82	167.38	194.2	190.03	199.17	169.8	194.41	162.72	193.38	202.41	160.34	161.92
161.71	132.59	116.63	123.28	115.44	145.53	112.64	136.71	121.75	141.82	129.06	160	127.57	181.34
137.03	91.411	109.15	147.01	102.02	133.53	129.56	141.52	129.39	102.99	123.95	79.672	125.23	118.39
92.682	91.411	109.15	89.629	89.084	79.05	69.647	78.119	60.932	107.01	145.69	114.92	118.35	118.39
86.635	80.386	76.683	89.629	75.001	73.488	96.036	78.119	116.01	82.169	61.496	96.076	78.387	91.961
150.65	118.65	162.93	151.53	158.59	167.01	98.731	112.04	116.01	138.99	202.63	93.953	139.25	81.122
200.8	107.89	223.8	122.79	176.9	141.04	133.37	126.77	112.19	94.153	104.7	109.57	98.024	115.72
74.914	59.401	60.576	56.008	64.676	54.453	70.36	69.774	89.353	89.952	69.715	105.55	96.289	100.27
64.973	78.781	96.668	67.102	99.589	91.752	47.931	81.393	47.616	91.969	101.12	75.908	97.384	77.846
86.347	70.81	48.053	56.362	55.639	60.171	105.63	47.753	129.07	81.098	76.665	83.596	74.728	90.678
55.311	75.407	45.439	56.362	55.639	55.066	55.781	59.146	73.404	74.777	81.454	109.5	77.085	104.88
81.452	92.783	165.78	86.872	127.11	123.29	94.365	80.913	61.518	119.52	121.61	127.94	115.24	126.23
78.299	141.42	165.78	86.872	143.73	125.76	86.883	102.57	80.518	151.46	159.51	111.93	151.59	101.44
149.03	121.8	159.97	126.05	161.41	158.87	137.79	102.57	143.06	120.44	156.22	171.11	141.86	168.65
173.35	158.34	198.36	126.05	161.41	158.87	139.03	122.45	143.06	185.34	186.52	190.8	173.02	193.63
190.13	154.71	114.91	100.63	113.88	120.68	158.04	108.32	172.38	135.31	125.29	190.8	119.58	169.49
177.43	175.58	154.01	130.65	164.93	164.53	170.93	144.05	178.79	140.41	114.06	186.66	93.162	175.48
180.32	182.82	129.18	115.75	148.2	149.13	124.14	130.87	142.94	171.75	179.33	186.66	177.5	179.59
141.52	158.47	152.72	154.61	137.21	148.92	160.88	130.87	152.63	175.32	143.89	217.9	124.16	179.59
76.675	157.52	170.09	151.29	154.23	124.74	199.74	134.83	187.74	175.32	188.27	181.03	168.32	149.32
93.217	79.88	130.21	99.041	103.69	101	111.47	88.772	121.35	103.13	122.73	84.645	100.95	70.621
146.27	203.13	171.23	172.44	192.41	195.51	174.25	180.16	147.28	139.66	127.42	164.74	117.8	174.51
220.17	257.32	250.17	172.44	215.44	232.03	178.64	180.16	147.28	216.85	227.15	234.26	165.6	230.67
124.13	97.896	92.231	98.857	85.201	95.67	66.905	94.994	65.179	116.35	119.09	95.649	102.03	100.81
133.01	97.896	82.05	100.23	74.355	84.673	101.71	88.93	96.263	116.35	69.3	134.21	95.468	85.767
133.01	109.94	209.85	122.9	200.36	158.78	122.76	129.73	121.13	107.38	128.49	148.78	102.73	117.5
54.926	72.862	84.61	81.832	84.157	95.061	55.376	95.033	50.198	45.622	50.641	46.528	82.293	45.565
116.11	127.09	96.08	143.57	113.85	126.94	145.51	120.18	143.1	104.35	116.25	157.03	139.43	171.07
96.513	144.52	117	67.059	122.65	118.89	72.469	86.755	70.424	170.63	173.24	147.65	171.85	146.31
135.72	121.91	121.34	84.962	71.882	93.767	164.78	75.728	153.29	141	158.92	166.51	141.54	169.01
131.55	155.53	113.12	102.63	72.765	93.89	164.78	98.491	166.68	216.94	203.13	235.27	171.12	242.81
150.13	187.07	217.38	218.76	208.34	199.83	287.2	230.98	247.3	145.15	152.58	160.8	155.25	171.59
80.213	105.36	72.916	92.257	76.909	103.34	96.919	89.99	105.84	106.77	114.28	108.79	142.02	126.36
78.303	101.8	62	81.224	65.898	74.755	73.519	84.954	75.291	106.27	107.55	89.991	150.99	111.35
119.88	123.92	161.06	147.41	149.51	147.52	125.36	156.11	105.06	82.768	113.52	91.55	136.53	133.58
97.58	123.73	109.94	97.623	120.71	103.67	96.156	102.62	85.996	133.99	135.23	106.22	136.53	92.836
93.859	78.158	109.94	97.623	120.71	101.84	100.97	102.62	92.776	65.875	65.176	79.044	76.072	74.656
159.88	117.05	133.34	152.08	138.07	141.25	151.2	156.36	166.89	94.054	98.036	123.46	82.433	99.971
49.621	117.05	140.44	169.71	138.07	141.25	166.09	147.8	188.46	92.82	95.59	105.51	91.223	75.067
42.374	40.99	46.862	53.848	57.442	61.128	30.452	51.95	26.083	43.654	58.176	33.47	63.837	25.176
99.416	74.885	57.616	70.711	55.188	69.842	112.32	74.24	119.03	54.111	74.183	91.992	59.513	133.44
201.99	213.02	194.08	172.23	183.62	180.25	264.94	146.01	252.69	137.61	150.28	221.69	127.33	225.95
192.38	182.23	195.86	108.81	182.92	167.14	114.36	109.77	119.48	149.35	176.83	201.2	127.33	174.94
176.85	177.94	164.03	141.52	142.05	147.19	156.49	145.36	164.91	205.77	192.09	258.36	144.05	250.07
154.43	107.04	98.396	101.97	87.397	105.57	122.36	111.07	134.94	141.59	139.54	114.68	135.78	138.99
165.82	139.01	162.73	162.38	166.96	162.39	191.97	179.2	169.15	174.81	139.84	126.25	179.26	130.86
87.323	120.6	73.984	99.897	73.483	77.345	68.499	75.94	74.021	174.17	139.84	126.25	135.86	101.8
194.65	170.01	193.94	104.24	162.14	137.44	192.49	109.32	205.91	165.9	170.2	202.92	135.86	208.85
85.162	131.36	172.95	106.27	155.99	117.76	155.29	107.48	167.49	132.56	113.77	153.69	114.42	172.69
149.56	153.04	66.579	100.02	63.106	78.451	112.31	83.327	121.92	134.77	114.81	156.81	163.13	168.34
165.75	129.57	129.13	140.92	99.749	103.17	146.93	125.57	137.05	107.64	94.818	156.81	98.028	149.32
97.536	80.753	117.25	84.635	81.822	81.868	112.6	86.303	111.17	98.586	73.879	87.235	98.028	126.42
128.13	116.87	138.1	119.61	108.81	99.846	189.23	107.13	169.62	109.14	115.36	145.01	104.31	137.43
164.26	92.982	112.41	119.61	105.62	105.5	112.52	107.13	97.898	96.837	89.298	89.23	78.467	88.012
151.39	101.4	92.71	134.74	100.58	100.48	94.92	128.76	106.74	113.02	111	89.175	199.78	103.2
96.904	101.4	91.263	96.92	83.741	122.33	104.07	94.803	109.03	113.02	111.21	102.42	136.1	92.083
89.21	143.58	132.25	149.42	125.02	136.73	130.05	142.53	118.86	108.65	104.34	123.49	70.555	115.46
126.47	155.56	146.6	66.291	104.93	111.66	155.25	84.931	218.4	122.3	145.19	199.44	112.4	253.57
149.11	130.75	146.58	116.69	104.93	111.66	132.03	106.03	163.26	122.3	151.92	143.9	134.14	163.86
144.77	212.98	146.58	121.73	140.4	163.81	119.76	128.23	124.97	170.52	151.92	237.3	162.64	210.96
82.227	130.73	78.939	59.477	77.881	79.37	52.148	53.98	50.188	205.14	175.16	138.01	190.06	99.377
36.734	128.94	103.02	38.198	77.881	79.365	52.653	51.927	52.043	182.4	164.27	101.65	164.26	94.021
70.819	72.284	79.051	38.983	71.102	61.68	75.52	43.977	92.995	78.125	121.09	104.66	134.45	122.21
142.6	125.07	103.68	78.37	71.102	101.58	86.944	62.854	92.995	193.82	164.82	165.25	169.83	200.77
170.19	152.81	136.47	81.602	119.14	121.95	142.75	80.341	131.14	193.73	194.22	247.48	180.28	216.88
133.21	140.22	107.13	70.989	93.108	93.287	152.1	79.139	162.52	161.16	139.62	207.04	144.78	197.14
101.11	67.546	90.724	62.225	82.04	71.707	171.6	60.207	209.21	122.47	117.04	88.674	121.01	143.81
127.92	68.729	99.036	70.995	65.373	70.179	135.33	58.401	153.59	122.47	117.04	118.61	124.36	132.94
127.19	93.621	100.67	106.59	98.378	101.68	83.396	111.02	112.57	138.48	144.15	80.77	183.34	89.141
104.16	93.621	105.7	82.164	98.368	91.814	115.71	69.74	115.53	86.279	116.9	51.426	96.242	57.897
78.46	80.741	74.611	71.714	76.273	88.791	63.628	56.584	86.283	94.288	91.202	87.606	96.242	70.468
98.93	147.77	106.57	116.01	89.151	113.96	129.01	110.7	151.72	166.29	182.45	107.16	175.48	123.97
60.152	97.922	68.078	74.276	64.513	71.637	62.516	64.024	39.304	99.663	80.663	65.039	90.155	70.777
73.249	97.922	58.734	57.466	58.13	73.226	56.662	57.558	51.281	166.66	162.24	82.48	182.44	87.729
56.213	50.785	37.617	48.776	38.591	54.213	32.531	57.813	43.81	50.503	71.771	39.753	83.369	92.431
41.693	42.736	26.465	34.526	28.731	36.365	74.87	33.935	93.554	42.113	35.988	51.923	43.22	98.885
49.354	20.195	23.885	30.993	24.494	31.429	21.694	29.265	15.873	19.704	16.048	12.452	21.92	20.26
65.381	56.235	65.903	87.97	91.275	92.036	46.854	101.72	43.256	29.005	26.626	34.662	22.539	20
35.855	34.222	61.707	40.665	28.175	48.404	30.725	42.927	39.354	27.473	17.064	31.184	20.363	19.92
59.675	34.222	40.252	47.982	28.175	32.361	28.888	42.714	29.406	72.287	44.864	51.081	49.314	32.738
49.376	105.94	42.82	48.756	55.047	73.006	40.128	48.001	38.149	117.02	105.52	91.033	159.4	74.993
49.945	107.12	42.82	71.31	69.881	76.808	98.489	72.684	107.88	201.22	124.58	94.248	174.94	99.036
103.76	89.222	87.319	62.125	71.958	71.14	104.39	60.08	112.2	103.86	128.06	75.451	110.49	87.882
111.78	95.568	127.18	83.431	99.259	88.104	170.91	92.163	203.08	53.416	53.435	106.2	50.546	146.01
111.25	117.36	118.69	129.22	117	111.69	117.68	136.09	99.336	82.033	66.291	171.05	85.539	167.89
115.38	134.84	192.94	131.16	155.27	144.82	148.32	136.12	166.58	168.86	191.02	156.47	194.51	127.3
118.39	117.01	86.383	105.09	92.792	95.02	87.976	112.25	86.192	143.14	125.18	183.32	116.6	109.99
101.62	162.1	171.32	121.2	147.91	154.47	179.53	130.99	151.65	122.58	127.46	152.53	116.5	109.99
131.66	114.22	157.86	94.907	121.83	139.64	101.58	74.061	112.32	148.99	139.25	111.59	198.46	123.96
118.78	68.868	63.477	68.079	55.834	91.712	85.567	61.129	84.949	95.773	88.087	43.16	161.72	50.723
112.16	125.66	185.35	140.95	166.4	131.86	132.38	167.33	139.11	130.87	105.75	120.59	111.42	118.96
103.27	68.774	77.317	89.387	74.934	72.453	71.661	87.669	91.641	102.26	94.66	111.09	99.321	117.11
121.93	69.063	85.522	89.387	72.481	77.966	76.626	87.669	90.536	75.17	62.437	77.869	142.43	57.196
134.07	87.334	72.042	75.965	72.481	68.41	76.626	71.37	69.915	117.27	94.195	87.802	130.86	71.032
135.62	103.21	73.661	112.55	100.11	117.17	112.58	123.89	118.54	96.078	91.181	123.63	92.215	86.747
130.09	86.833	121.81	98.564	114.68	106.03	114.47	109.47	142.55	84.761	122.21	77.963	91.644	126.75
143.37	109.2	158.71	132.91	143.33	129.93	202	124.46	175.7	142.41	176.07	108.03	174.26	126.75
192.7	144.9	218.68	153.11	189.33	199.48	196.75	150.18	175.67	167.29	187.57	179.61	188.21	139.69
181.64	197.57	257.82	203.17	217.3	224.54	321.27	227.59	279.94	144.84	159.06	181.09	145.24	187.88
95.501	96.838	75.689	104.03	98.925	102.66	207.16	105.78	195.08	107.38	93.375	121.19	85.668	132.57
94.773	96.838	70.917	63.558	51.39	53.348	141.45	58.093	137.11	126.04	100.73	121.19	108.76	136.1
130.57	159.14	191.43	138.72	149.81	137.79	158.82	126.6	157.26	143.96	150.41	155.69	137.9	161.73
103.18	80.586	103.14	83.049	89.234	86.783	102.29	88.995	110.68	111.89	90.114	122.35	98.892	106.72
157.5	99.548	132.28	90.179	120.01	112.74	72.291	104.76	84.35	106.82	137.84	102.7	124.99	103.49
115.21	91.383	113.99	92.302	78.713	94.329	135.79	99.122	131.37	141.82	150.27	178.23	180.69	206.13
130.43	235.32	231.36	162.88	186.23	199.89	201.96	166.64	201.37	201.38	200.78	238.05	182.45	227.79
129.82	97.526	111.58	113.96	108.74	95.018	122.34	104.61	128.88	66.362	74.884	96.997	76.678	91.076
104.55	110.06	111.6	134.38	114.95	126.08	98.644	125.65	85.028	137.25	154.47	72.076	144.23	63.257
133.11	103.73	97.863	92.395	93.352	118.38	71.784	84.873	90.901	112.45	121.96	81.694	116.2	101.32
106.57	61.107	54.308	56.177	51.928	59.765	53.425	49.866	61.8	64.394	71.963	83.595	88.828	85.16
60.965	59.744	82.718	51.571	61.979	53.537	51.793	46.592	61.8	84.837	71.963	77.92	78.714	85.16
81.402	74.755	80.288	47.144	64.085	71.994	37.1	52.093	46.616	83.965	97.289	62.268	104.71	44.555
60.938	122.37	111.06	94.865	90.952	96.734	158.43	93.175	167.58	118.8	134.53	110.03	134.6	128.67
91.996	95.433	126.45	62.428	98.097	89.493	96.501	68.228	101.02	77.782	91.879	89.157	103.17	98.841
71.219	102.57	155.49	70.506	121.82	96.311	69.347	78.037	89.889	96.884	146.96	84.501	126.44	68.988
106.02	127.63	105.52	81.716	126.84	117.95	127.74	83.823	159.3	162.43	166.4	136.88	207.98	158.42
128.87	101.49	119.87	86.163	114.12	93.882	105.16	86.427	116.65	99.856	106.14	136.88	104.66	147.76
102.32	91.871	81.298	96.692	85.519	98.586	101.36	93.651	64.541	59.93	66.151	80.966	63.683	82.529
95.117	57.343	74.875	73.67	82.911	86.031	75.995	75.178	64.541	30.482	33.73	45.735	34.252	73.918
54.057	86.639	81.752	82.914	82.911	102.48	86.922	84.06	79.104	66.388	54.871	53.317	62.733	94.138
112.78	105.35	102.69	74.061	71.457	94.192	90.396	43.431	116.17	137.81	141.18	109.44	146.04	165.09
178.7	168.48	163.65	126.79	150.54	152.85	133.74	139.84	128.62	190.05	168.96	155.97	140.35	132.32
121.61	127.07	130.15	126.79	126.38	129.21	192.85	126.47	169.29	128.5	120.72	182.36	115.95	213.39
165.07	152.66	135.35	126.04	147.27	147.09	210.83	153.15	253.75	171.97	173.56	133.81	181.87	145.53
136.4	96.705	103.76	103.21	111.29	103.79	169.97	117.56	164.21	88.902	87.14	87.717	104.42	104.6
121.91	96.01	77.447	86.974	92.004	100.8	69.615	84.202	77.11	86.822	74.142	77.717	82.585	104.6
99.086	98.457	66.221	131.82	112.18	110.68	95.162	135.58	79.273	112.25	119.6	91.654	123.21	90.194
127.25	126.3	145.58	134.65	134.3	134.28	115.91	111.06	123.15	147.02	154.64	128.18	162.12	96.704
157.14	73.029	68.445	67.318	51.574	57.413	111.45	64.982	110.32	72.331	70.454	87.056	58.089	91.813
95.024	57.212	87.424	58.065	88.433	77.392	47.791	66.849	60.034	69.093	70.454	52.55	70.696	73.432
97.085	96.901	107.73	99.109	98.091	86.14	99.059	101.96	90.94	73.11	90.702	89.242	91.334	103.12
70.143	85.048	115.97	103.05	107.77	98.818	113.44	116.21	92.173	74.386	70.624	100.96	87.38	107.98
133.76	78.076	73.306	71.011	66.505	72.654	63.008	65.598	50.348	57.949	59.344	71.611	74.463	69.241
74.21	71.636	64.092	88.008	58.992	71.231	96.718	74.094	97.609	59.491	69.564	75.233	62.882	101.9
64.511	54.176	33.667	47.282	34.809	40.908	79.001	37.725	87.052	60.729	82.391	65.851	62.584	87.034
46.654	59.042	23.303	39.127	29.674	36.105	90.051	35.185	116.11	78.096	43.47	82.58	54.639	97.164
53.968	48.391	33.602	19.134	23.948	26.924	39.581	19.656	48.211	55.2	57.044	51	47.583	95.766
68.982	36.243	31.204	16.671	16.668	16.72	41.707	12.186	57.019	51.859	40.537	60.2	51.28	95.979
42.307	42.917	27.245	28.678	29.176	37.823	41.707	22.804	47.214	78.286	66.598	49.185	87.319	93.916
41.233	27.461	30.829	28.172	37.054	30.955	24.74	24.473	19.564	41.153	36.574	22.544	48.006	30.194
44.502	17.543	29.913	34.068	24.415	26.795	16.229	20.691	14.041	31.737	20.225	18.481	25.563	30.194
21.878	27.681	18.674	31.883	27.787	24.837	18.033	21.561	16.027	22.943	19.793	26.924	25.776	49.028
21.573	27.681	18.674	24.026	17.727	17.416	20.047	19.981	16.332	39.087	24.19	26.924	25.776	62.101
12.101	21.605	15.856	30.668	17.052	16.653	21.097	18.859	15.984	24.813	23.606	22.249	23.773	20.456
20.224	24.214	21.348	37.9	24.983	25.442	23.189	22.653	17.803	33.567	22.522	11.912	34.136	30.65
16.205	12.99	12.046	15.599	11.456	16.4	7.8998	11.737	9.0708	18.003	27.709	8.5355	30.316	31.009
12.205	12.99	10.751	14.103	15.537	16.092	8.5085	11.384	12.777	17.823	16.889	10.728	24.111	27.758
6.499	10.756	9.5189	13.328	12.609	14.639	8.9627	13.389	10.62	16.721	10.931	9.7915	17.718	43.959
24.595	20.156	17.62	18.057	14.951	15.954	17.247	14.736	10.62	25.197	36.712	12.274	41.205	36.304
18.099	21.078	20.421	22.989	19.023	20.155	19.544	19.388	15.998	22.355	27.21	17.459	38.061	35.365
19.718	25.813	21.76	28.283	20.82	23.813	24.409	24.167	23.369	24.485	25.946	27.721	26.247	35.365
33.607	22.031	16.51	26.807	16.261	21.802	26.374	20.713	23.369	18.243	10.897	27.361	16.438	24.795
33.37	12.991	18.373	32.514	19.732	24.62	20.104	31.023	16.944	8.0974	8.1646	15.482	10.045	19.598
27.767	35.866	31.967	44.946	36.01	43.73	34.726	51.933	33.544	23.072	19.861	40.634	24.378	44.172
42.657	37.765	27.895	58.975	41.399	44.085	43.475	59.867	42.881	21.411	13.333	36.293	18.476	56.914
30.217	23.785	17.71	35.309	27.622	29.121	26.342	37.062	23.73	13.742	13.07	21.457	16.831	52.741
20.507	23.158	17.304	33.795	23.625	28.666	29.508	25.521	29.08	16.819	15.391	25.22	15.682	30.221
22.478	19.406	16.574	20.598	20.246	26.304	22.918	24.741	31.567	14.292	15.029	21.617	20.248	33.768
30.157	35.247	22.691	39.62	28.492	32.473	35.937	34.86	39.261	21.197	15.099	46.804	27.238	98.392
50.074	38.046	25.224	56.76	27.728	36.765	54.533	49.164	62.48	29.389	21.262	31.688	31.69	86.715
48.492	32.18	25.078	39.29	25.32	37.804	46.265	44.488	61.271	22.702	18.236	44.377	22.935	131.33
25.793	44.34	15.517	18.416	16.795	19.919	27.03	19.578	35.098	28.869	24.491	44.377	32.47	88.793
20.609	19.554	15.079	16.781	10.05	13.865	41.724	16.992	52.93	12.182	15.275	32.481	28.837	77.329
28.779	16.371	12.952	16.781	11.626	14.645	16.856	16.773	27.08	13.123	11.713	21.51	18.941	25.806
25.348	20.361	18.576	23.642	16.746	16.707	28.58	22.897	30.284	24.841	26.457	22.507	32.481	35.271
26.976	33.357	22.501	30.747	26.77	35.442	20.615	34.241	29.431	47.025	33.763	23.348	62.844	29.85
32.58	54.449	29.23	51.508	41.208	47.373	32.281	50.719	41.135	81.313	76.041	45.898	91.238	68.278
18.357	29.584	23.436	28.973	26.973	29.4	22.996	23.265	26.237	18.434	29.707	14.944	45.432	23.958
18.49	20.212	15.754	22.576	20.972	16.616	18.117	17.995	19.016	18.153	16.686	20.179	36.199	16.749
21.677	20.694	15.754	22.461	20.972	18.314	18.117	20.271	16.282	23.986	19.875	22.03	31.694	29.99
23.165	27.512	19.072	32.062	19.479	20.972	34.198	25.08	57.874	23.899	17.388	43.635	21.913	132.84
28.122	20.762	11.22	21.7	15.449	18.021	26.015	19.622	33.85	20.312	11.24	31.816	19.487	97.281
30.777	19.064	9.8744	23.855	12.874	15.534	28.349	19.622	31.289	52.553	18.329	32.565	24.879	64.915
38.4	43.344	25.667	37.488	29.558	34.495	43.851	35.886	46.912	46.202	30.515	64.392	35.491	49.71
18.945	24.656	16.971	24.516	19.831	21.112	15.388	19.507	22.683	33.685	24.77	36.96	31.385	72.537
28.997	35.283	23.421	29.693	23.605	30.379	27.119	25.86	30.674	46.624	34.907	39.284	45.035	99.114
45.77	36.374	24.462	49.686	33.275	39.105	34.994	50.793	36.712	18.898	17.568	31.203	16.537	64.359
44.363	40.747	30.487	49.686	39.682	39.769	52.998	51.648	69.928	29.048	23.853	37.199	30.066	46.109
48.932	44.274	49.894	62.272	63.369	61.467	28.172	66.966	24.206	20.346	23.982	29.372	19.983	28.994
26.219	23.349	24.574	45.069	27.892	32.926	20.305	42.319	21.095	10.495	9.6495	11.435	12.691	10.597
52.258	53.576	31.926	54.583	35.891	42.545	41.122	56.49	34.863	38.287	29.859	41.847	44.692	38.603
30.83	57.957	31.926	42.662	35.32	36.879	41.122	41.051	34.863	74.649	59.817	57.887	84.728	58.669
94.172	129.75	115.19	152.6	111.88	128.74	93.498	122.53	94.27	134.33	116.07	123.62	104.91	112.17
60.047	86.648	88.765	64.761	81.902	71.234	93.297	63.913	108.19	84.111	91.533	50.235	97.497	47.033
75.084	52.904	39.792	57.032	49.465	55.836	96.945	60.505	118.37	33.081	24.428	50.831	35.488	70.746
69.39	72.393	52.053	89.482	59.675	64.355	70.668	81.837	57.773	113.44	117.85	78.047	139.54	94.896
55.524	96.562	47.032	62.675	65.097	68.096	62.828	67.534	60.578	157.82	133.13	113.47	150.89	111.94
119.23	129.62	159.91	124.72	171.54	164.36	73.817	127.29	74.103	120.89	131	84.174	111.54	71.314
95.048	92.936	86.881	69.29	58.922	66.353	84.457	70.764	86.957	70.137	63.512	84.174	62.112	84.627
121.21	90.241	116.22	83.021	110.66	83.763	102.44	87.669	101.1	53.85	50.787	76.439	40.248	110.26
47.015	71.048	116.22	127.52	114.73	118.84	108.31	133.87	101.1	63.033	61.646	69.706	52.402	118.78
87.879	55.485	67.773	69.197	72.078	72.367	48.966	62.748	39.093	62.533	51.616	45.979	66.683	95.639
59.343	109.81	88.705	87.865	88.029	94.85	71.502	95.717	69.522	126.19	133.45	76.696	132.71	95.639
59.343	63.005	65.717	62.864	58.811	57.606	59.682	64.137	49.603	75.964	61.606	65.634	63.34	100.16
92.815	92.48	99.82	124.2	109.16	101.73	148.94	133.77	143.04	71.5	71.56	118.18	69.677	143.46
79.902	109.81	92.676	105.18	80.01	95.898	186.99	95.389	177.24	99.727	129.64	108.94	119.85	113.92
99.781	92.229	59.552	92.697	77.009	85.76	136.86	89.492	150.74	83.476	99.529	97.772	80.492	112.57
131.64	88.1	68.196	74.647	70.81	76.294	98.981	76.532	109.4	94.995	64.418	129.39	75.999	134.18
110.17	145.64	139.75	152.58	147.65	158.19	89.171	131.48	108.79	138.8	105.3	104.15	103.53	99.761
60.052	131.47	100.45	120.37	122.68	141.5	62.269	112.25	59.063	147.49	190.86	108.82	161.57	126.09
82.664	94.922	98.932	54.629	109.99	78.912	75.336	65.771	86.877	136.43	142.81	96.881	136.47	129.84
106.83	95.213	123.57	110.99	130.49	137.75	119.59	121.16	119.5	105.25	104.49	89.719	116.94	77.2
137.01	95.213	123.57	92.607	117.89	108.94	94.711	106.55	96.295	126.37	112.12	75.415	120.39	74.731
138.43	88.319	94.519	121.54	98.937	119.42	133.8	115.52	130.4	93.498	88.586	74.922	94.451	108.56
95.673	65.813	82.962	105.47	80.433	87.573	120.42	93.136	129.45	65.506	49.8	78.45	74.722	108.72
139.2	99.71	96.238	135.17	113.18	120.91	112.56	130.52	113.05	101.11	97.493	88.916	80.699	88.038
123.73	155.35	152.64	95.744	139.52	120.1	112.56	102.15	113.24	194.55	152.03	178.61	166.27	112.9
153.98	146.73	158.58	115.48	138.83	138.4	138.41	118.13	159.18	154.46	152.03	148.3	166.27	115.82
72.792	71.406	112.6	112.18	125.54	103.33	118.51	110.56	78.181	41.833	51.517	64.774	51.432	63.729
72.792	39.487	67.915	53.378	67.908	56.244	54.422	47.689	58.333	38.019	51.517	42.283	51.432	40.747
95.074	61.112	99.049	63.01	64.196	57.963	73.614	59.63	83.22	53.686	75.972	59.745	51.883	86.238
150.31	128.82	114.49	122.54	110.08	116	92.604	116.41	92.235	160.37	160.09	124.4	127.28	112.02
188.34	233.91	148.53	101.4	152.44	133.82	129.18	122.57	140.84	197.68	206.58	288.32	182.09	293.6
144.75	95.272	58.603	76.208	85.699	97.754	61.263	68.761	59.078	114.17	121.86	119.77	114.35	104.31
95.567	78.428	76.447	101.49	83.982	103.48	135.08	101.61	183.95	59.064	69.053	62.462	103.38	107.78
133.19	197.76	241.23	176.96	225.03	221.71	102.77	179.9	85.519	232.5	232.36	172	214.5	114.17
133.66	161.68	203.17	131.92	161.1	139.01	107.01	131	93.016	147.96	190.63	140.26	152.59	114.14
66.638	78.348	124.65	87.804	116.01	96.076	89.678	102.46	90.474	80.445	100.79	67.138	99.892	109.31
65.506	108.44	133.7	138.45	152.56	131.03	112.14	139.86	113.53	77.332	68.08	81.161	82.632	81.501
113.49	141.92	115.74	115.22	120.61	124.55	115.67	125.69	163.26	173.96	158.91	203.6	161.88	172.68
89.309	100.94	118.51	94.201	102.02	104.48	112.07	111.77	104.15	84.833	119.5	106	113.63	100.28
70.684	72.515	95.387	127.15	91.378	104.48	115.99	113.44	103.69	58.897	68.915	83.755	81.85	49.334
82.135	66.053	86.269	91.741	78.864	79.113	62.753	94.684	52.32	56.685	68.915	63.333	64.452	77.501
91.855	142.35	101.78	100.06	100.9	102.17	132.96	105.79	123.03	105.93	117.27	130.54	116.64	126.86
62.273	120.89	100.62	109.27	102.05	113.09	64.491	104.07	51.164	105.93	129.21	110.6	116.64	106.16
105.87	132.42	122.88	90.183	135.74	125.07	60.421	79.058	65.567	151.26	144.46	169.21	131.3	153.92
190.69	131.08	191.36	128.4	178.14	189.37	52.705	115.6	57.548	163.52	180.93	153.35	153.21	141.59
221.9	127.67	138.76	98.552	121.45	117.11	128.08	81.911	142.59	146.89	161.79	154.86	148.62	184.15
158.09	201.54	185.43	152.41	182.67	148.97	157.88	187.75	154.94	146.89	130.61	207.65	152.63	168.83
185.54	130.16	164.21	134.04	155.45	151.34	157.88	131.55	153.08	125.54	142.5	116.22	137.12	130.91
64.104	119.07	139.32	77.275	144.96	112.07	76.034	80.552	62.274	125.54	142.5	103.4	127.47	87.616
109.4	130.92	142.29	88.097	144.96	131.27	95.586	92.928	78.083	152.01	185.32	114.8	204.66	112.75
134.78	188.15	181.18	186.75	181.97	188.61	251.65	187.65	236.51	164.78	155.28	189.09	151.16	179.05
203.72	102.7	88.647	102.19	90.304	88.106	146.6	78.797	166.22	96.601	76.123	117.71	89.8	111.63
129.74	78.399	88.647	112.21	94.613	98.466	119.27	109.28	105.91	78.311	57.538	108.63	74.18	104.69
112.08	148.37	137.07	119.4	154.6	132.84	172.27	118.47	150.64	93.463	97.098	111.73	96.401	104.69
201.33	148.37	198.75	235.06	208.89	195.54	227.93	266.74	202.24	99.616	133.85	140.37	108.04	153.9
113.16	80.907	77.465	85.581	72.486	71.48	116.3	73.099	128.14	99.616	120.48	94.853	115.85	90.292
111.09	93.794	77.09	108.89	88.608	87.527	96.716	106.69	107.89	143.96	120.85	103.57	146.65	139.17
178.96	134.43	119.88	138.74	118.06	122.12	131.77	110.91	127.86	132.01	118.69	137.1	106.19	82.349
130.52	169.87	138.54	130.44	136.38	134.68	112.45	115.58	98.684	221.77	208.07	166.94	192.35	139.7
182.01	235.67	266.38	210.43	266.31	256.36	134.41	232.4	117	221.77	208.07	176.13	192.35	150.54
137.56	240.78	254.75	202.29	247.07	200.14	245.45	209.97	216.06	171.51	184.31	226.49	155.94	228.7
134.57	137.86	190.21	108.56	153.36	132.82	66.666	105.93	69.85	139.57	154.71	124.89	155.43	96.534
81.916	91.98	89.48	76.656	74.479	96.349	61.364	75.213	78.154	117.16	137.52	72.506	135.16	96.568
108.95	85.074	103.98	108.21	105.65	92.433	136.42	96.945	121.24	45.321	67.715	64.692	64.229	105.19
108.95	60.338	67.991	81.554	67.033	80.279	81.088	81.077	79.024	65.866	61.452	61.705	56.714	50.232
78.122	87.841	68.131	81.554	88.233	81.745	56.357	94.111	48.85	96.806	116.15	80.967	123.48	85.926
129.24	143.8	149.78	111.91	133.58	127.8	136.94	120.66	148.68	110.8	110.79	114.4	91.803	97.104
127.7	122.95	209.2	187.11	152.5	146.77	195.31	171.34	189.49	101.89	110.79	83.055	86.808	91.43
43.414	50.431	79.296	104.55	71.078	74.575	75.021	81.47	73.355	35.446	33.68	46.884	36.979	65.156
80.19	87.015	93.642	104.55	98.754	113.13	117.97	111.78	115.81	77.723	106.53	61.343	82.547	131.51
159.22	184.11	226.86	186.36	231.11	189.86	203.09	191.9	172.33	132.83	167.92	141.24	131.08	137.56
159.22	184.5	155.33	152.14	180.62	171.15	194	168.07	213.21	184.87	178.86	184.32	154.62	163.06
112.83	100.39	80.544	99.889	76.239	94.63	238.87	88.934	230.53	85.168	88.464	175.64	92.852	179.22
127.46	110.93	84.676	117.65	73.937	87.218	164.35	125.63	133.98	122.85	93.491	98.913	104	83.932
117.9	90.229	58.591	57.48	69.702	76.949	150.06	69.074	137.72	106.19	109.01	129.43	99.096	86.748
132.77	90.229	136.31	85.478	143.63	91.779	90.766	109.7	87.386	67.077	100.18	66.526	87.327	77.924
94.04	124.85	131.68	90.001	135.39	124.33	56.998	110.86	47.215	131.47	167.03	74.565	163.59	105.03
77.825	94.095	92.253	103.8	101.41	112.72	87.096	120.71	84.885	76.302	80.746	124.24	69.829	165.69
128.12	201.2	259.47	156.22	214.16	192.77	143.37	159.95	123.24	224.4	195.19	205.16	210.08	191.59
120.26	215.45	275.54	188.58	252.32	212.75	214.57	188.83	210.09	168.25	186.89	230.18	210.08	205.99
133.97	140.58	127.09	141.52	140.04	122.78	155.38	152.47	157.88	150.89	147.95	174.99	173.48	200.76
123.89	142.64	198.61	133.59	186.67	169.75	159.98	146.99	157.92	125.19	160.6	124.6	138.56	134.45
93.763	105.92	84.733	96.932	114.75	102.79	135.31	100.28	159.26	110.48	120.32	97.009	105.15	75.767
93.763	93.422	84.733	116.66	110.1	102.79	115.22	110.93	120.66	95.954	89.571	102.8	105.57	118.75
87.178	72.081	104	93.137	87.573	76.621	113.76	69.599	107.99	78.94	77.447	83.816	81.151	96.248
123.68	179.15	123.12	140.17	124.75	145.37	130.32	130.34	110.12	139.05	149.16	171.49	134.02	127.87
167.83	167.19	155.99	154.19	159.95	162.29	122.21	160.35	113.54	139.05	149.16	138.23	134.02	125.9
146.94	108.14	145.88	122.88	109.51	89.167	148.16	120	125.86	93.627	119.85	99.192	94.037	82.994
82.866	94.804	92.051	127.06	109.05	108.73	138.95	133.23	125.86	90.799	94.832	107.12	106.71	98.451
128.97	94.804	130.61	141.82	125.86	120.92	93.752	130.19	82.914	100.64	101.16	98.51	106.71	97.519
134.89	137.01	136.21	142.22	138.2	161.02	144.81	122.85	159.83	130.89	146.01	171.69	129.83	148.81
58.744	61.605	84.209	77.306	81.757	80.64	45.014	74.898	40.435	57.981	67.117	45.035	54.814	40.332
50.503	51.234	42.053	66.828	58.223	68.899	51.932	72.771	46.403	31.556	33.163	37.443	32.967	37.279
14.796	40.201	42.053	71.985	59.746	55.034	37.972	72.773	25.921	18.809	17.553	24.25	17.287	26.936
54.07	57.752	75.048	71.694	68.005	75.999	72.149	77.86	95.337	82.055	92.169	53.084	128.29	106.22
55.769	57.752	44.375	55.954	49.205	70.076	43.207	44.46	34.171	100.22	114.05	51.29	128.29	91.967
84.507	129.12	84.918	94.47	113.11	115.37	74.772	93.392	65.995	174.03	154.7	157.52	154.48	144.73
138.09	181.87	155.95	109.8	148.69	147.89	202.37	125.39	199.6	174.03	158.05	244.97	151.78	249.8
103.7	141.93	176.83	115.88	190.32	162.13	111.58	139.99	132.31	162.67	173.56	115.83	135.77	91.606
120.35	108.33	131.12	116.56	137.99	137.27	77.634	127.21	69.53	140.09	181.81	94.384	157.6	60.533
120.35	111.17	146.88	154.82	137.99	135.49	183.13	144.04	162.69	85.176	89.583	136.05	83.289	146.44
99.676	129.1	113.75	86.197	109.71	97.943	54.701	85.408	67.251	126.71	120.18	113.7	110.5	76.62
108.73	65.265	69.874	111.24	71.649	93.33	68.116	104.08	59.548	123.05	93.212	73.667	95.168	50.583
64.933	78.755	152.21	128.54	107.46	94.992	138.56	132.94	129.04	58.524	62.29	79.056	61.383	67.029
125.45	82.449	88.357	87.876	81.831	76.558	131.23	84.698	156.24	68.662	88.078	91.113	66.97	97.559
114.01	143.5	171.59	93.766	153.9	149.03	83.462	103.86	103.4	160.98	159.72	147.17	184.74	100.53
171.69	154.09	163.44	121.84	140.27	132.03	180.33	117.31	199.12	160.98	190.72	166.61	193.92	146.39
112	113.59	98.72	116	105.3	112.46	130.33	103.67	129.8	146.82	150.85	166.54	168.68	141.2
109.56	146.72	156.59	135.3	173.14	144.34	154.78	137.39	157.92	183.76	161.14	160.4	168.03	118.93
119.67	177.92	173.21	118.17	155.38	159.41	149.55	133.1	145.4	172.3	197.48	177.91	179.43	181.25
170.3	156.7	135.55	129.73	141.15	139.46	140.98	122.29	124.54	135.06	145.4	156.06	127.77	142.82
163.87	161.78	161.78	125.52	162.83	162.99	133.54	122.29	118.58	147.69	140.26	151.88	123.46	119.02
101.54	93.328	87.873	81.137	91.551	103	64.835	74.079	67.913	140.76	111.86	121.34	116.98	116.02
106.88	114.33	223.3	127.93	208.21	165.85	86.292	140.96	77.35	105.52	138.87	128.64	154.79	98.59
81.123	52.639	56.564	55.768	52.959	51.732	55.076	62.771	53.585	63.54	81.73	54.95	74.922	70.382
138.27	86.779	95.645	92.637	97.479	86.656	121.11	106.16	124.21	118.73	121.89	140.25	143.36	128.21
153.53	230.83	271.02	137.36	224.45	181.93	191.83	143.33	197.23	204.43	223.4	217.63	209.53	215.85
175.45	204.89	178.31	123.61	150.59	144.98	149.07	120.88	150.58	193.72	208.8	217.42	218.38	185.58
117.96	118.2	161.54	119.86	131.36	118.73	100.93	109.52	88.55	136.66	137.01	147.45	114.93	125.45
75.323	97.049	138.01	119.86	118.63	115.3	100.93	110.42	88.55	100.02	89.547	113.28	97.887	84.729
124.39	82.44	174.71	91.601	147.8	102.69	77.797	94.476	73.901	83.056	95.626	46.982	102.48	70.933
95.251	66.944	66.964	83.344	75.177	83.932	54.667	91.602	63.002	62.415	43.015	53.062	84.092	63.782
57.049	69.785	76.142	69.941	78.273	93.121	69.399	78.582	74.776	71.459	69.433	59.526	85.126	72.271
72.598	100.56	76.142	86.204	64.869	85.103	91.608	85.326	81.807	133.6	133.08	134.1	148.59	143.04
107.59	169.13	188.52	196.17	196.65	193.52	141.21	200.04	126.92	184.61	222.98	180.39	206.18	203.64
102.15	147.22	164.71	113.23	150.06	192.38	83.164	134.26	81.684	135.77	183.45	82.223	163.21	53.728
83.551	40.891	76.916	80.704	83.365	95.309	49.19	81.417	40.345	26.339	27.433	29.633	27.28	37.522
83.551	97.449	76.916	106.23	83.365	99.721	125.49	97.442	106.53	69.994	55.435	128.29	107.08	137.87
115.85	197.65	148.2	145.54	138.17	157.32	201.05	144.63	187.94	221.86	225.87	200.5	189.94	196.52
187.17	164.36	148.2	112.38	138.17	126.68	144.75	106.62	115.16	174.27	178.54	200.5	152.85	171.98
169.52	102.86	127.15	77.359	139.2	118.01	116.21	80.847	108.09	137.99	140.55	161.4	132.14	122.76
128.94	92.376	111.59	105.05	107.31	104.86	91.122	109.67	81.088	85.546	110.68	133.72	100.97	121.13
151.58	148.25	164.59	115.37	149.26	136.99	128.45	109.67	106.93	181.05	234.44	145	200.2	133.24
161.97	148.25	148.44	117.18	137.22	135.79	143.1	98.16	141.67	151.51	188.97	164.15	159.61	140.11
171.59	275.4	234.86	216.78	276.07	265.72	252.07	258.76	305.29	218.74	202.88	252.68	204.35	241.6
199.83	213.61	212.52	117.15	187.54	161.58	155.47	124.87	169.93	222.8	201.37	240.01	194.88	220.42
110.33	73.014	95.046	109.6	106.51	107	116.69	104.62	119.94	76.021	106.1	78.143	86.653	82.515
98.357	104.54	142	156.3	136.97	137.38	116.69	142.37	112.82	63.96	56.883	136.05	59.265	149.67
113.77	162.54	131.93	154.12	136.97	137.38	102.85	142.37	93.268	124.03	102.99	149.62	121.34	92.671
147.63	96.579	111.34	109.29	116.77	107.77	93.49	98.63	80.219	99.922	86.694	78.074	109.03	90.665
124.53	103.56	99.558	99.51	109.21	94.866	93.842	98.63	103.92	85.055	93.839	84.265	90.945	81.726
109.77	89.28	92.469	99.51	96.333	109.08	78.43	115.31	68.814	104.7	119.33	77.448	96.728	61.594
81.536	77.893	83.214	86.488	74.475	83.791	78.919	84.189	67.685	78.642	88.758	59.073	76.645	43.236
126.83	80.018	75.761	105.14	108.65	90.161	118.41	111.17	112.41	77.2	86.119	91.776	77.086	105.01
105.3	80.018	51.942	71.701	60.06	76.883	117.74	63.629	122.45	87.041	72.784	91.776	109.55	105.01
78.766	65.767	66.173	91.437	52.196	56.115	57.622	58.882	56.707	87.041	74.338	67.532	97.175	63.425
179.93	152.25	180.9	139.19	172.11	162.41	137.28	140.81	120.36	121.12	133.7	173.53	139.01	150.06
172.03	212.91	247.67	158.37	225.27	201.1	218.09	160.98	211.1	173.17	197.77	270.2	168.03	218.09
144.54	191.18	217.79	141.4	202.02	150.07	151.42	127.57	137.3	196.91	184.15	244.27	165.39	213.45
122.86	183.89	190.81	212.51	188.68	150.07	197.5	200.62	170.32	187.88	182.81	239.17	125.32	213.45
141.08	187.09	324.21	192.88	275.23	228.34	234.94	200.59	224.61	177.28	182.81	164.78	125.32	122.6
90.542	174.96	104.93	139.23	115.95	138.7	195.77	141.41	180.17	129.95	136.36	162.39	136.81	140.13
176.87	150.8	163.41	129.07	157.89	174.62	147.82	142.66	157.64	183.24	191.14	219.55	176.19	202.15
204.49	127.68	212.9	113.48	175.7	105.37	214.5	131.31	251.67	155.07	149.71	166.86	122.74	169.3
107.88	81.996	127.8	109.17	102.57	93.86	90.491	123.23	83.608	97.877	88.006	117.58	98.032	100.21
77.817	98.588	99.709	102.86	92.104	99.748	116.89	108.72	124.99	112.73	112.27	116.34	136.17	125.11
97.097	84.986	97.806	102.86	98.521	108.15	60.067	113.04	66.938	111.54	84.647	62.371	99.553	67.927
57.727	55.726	74.132	69.099	73.903	86.541	56.378	66.956	55.08	48.651	52.207	45.343	84.887	53.769
92.177	43.001	72.413	58.322	89.58	77.561	63.861	66.956	83.607	40.981	32.116	49.165	48.068	71.101
110.16	124.96	94.532	61.493	81.283	77.561	134.71	61.385	165.13	156.08	156.4	139.05	151.63	157.17
76.285	88.198	96.43	75.959	66.532	82.684	98.641	76.296	86.924	70.199	96.932	90	106.36	101.16
64.963	105.77	129.15	99.541	125.31	130.65	85.76	107.68	86.924	113.33	104.41	80.363	115.48	76.703
119.28	118.58	116.31	114.1	131.13	130.2	111.1	111.85	114.09	129.2	132.1	81.717	105.05	86.41
110.32	95.75	91.834	93.943	91.291	95.124	114.91	94.529	107.73	93.738	79.91	88.276	75.62	67.845
57.748	66.393	53.968	40.357	42.149	47.987	48.96	44.326	54.567	90.507	114.42	55.516	121.67	59.997
73.933	66.942	48.867	37.138	39.073	42.958	70.789	37.742	78.61	68.107	74.321	76.506	89.268	90.772
75.538	70.031	53.538	44.513	68.257	54.059	91.78	41.501	111.64	65.585	77.368	72.631	68.438	96.321
59.97	115.66	74.675	58.919	48.652	61.13	75.9	61.099	84.054	161.32	138.78	149.6	149	194.73
58.256	99.392	57.336	68.332	48.652	61.13	88.745	62.059	96.044	142.86	138.93	112.6	133.64	146.12
65.25	57.578	83.019	75.915	83.075	81.781	58.774	78.71	55.486	44.253	56.665	42.604	81.677	72.67
80.119	71.875	79.315	72.057	75.673	77.945	80.952	82.755	76.286	50.657	54.221	76.345	56.31	108.11
67.872	74.141	58.762	69.073	67.506	63.702	71.534	63.233	71.791	75.095	61.805	64.508	102.21	108.8
52.728	88.732	128.86	65.55	102.18	90.815	68.111	68.164	64.73	120.28	120.62	68.332	137.4	112.82
90.451	114.47	85.089	80.554	102.18	106.2	112.51	85.186	102.83	138.92	96.01	136.4	152.25	148.24
108.36	223.22	154.96	193.64	151.84	162.85	112.51	191.4	91.947	228.28	249.7	214.8	240.87	143.41
120.63	95.436	121.41	100.79	124.8	113.29	102.36	94.533	115.49	103.1	139.67	102.12	94.947	104.57
65.706	80.895	92.965	89.057	91.693	89.046	102	92.104	106.59	69.178	93.833	69.952	60.851	126.03
104.93	133.88	164.44	195.28	166.1	157.69	225.22	208.11	199.31	103.82	88.792	137.63	88.992	130.98
120.39	181.33	164.66	116.51	152.02	145.86	175.84	131.13	192.55	166.96	169.87	237.29	140.33	204.15
135.4	181.33	189.33	136.65	199.81	177.39	192.2	152.69	222.57	121.4	140.54	176.28	127.54	186.83
164.89	176.39	121.53	88.181	120.86	112.79	107.76	92.407	126.15	246.32	254.64	248.23	232.2	152.03
96.631	80.627	95.032	88.181	90.919	77.722	99.771	92.407	101.03	64.048	59.394	79.701	66.686	83.824
93.987	111.03	97.029	124.49	112.26	112.14	73.41	126.37	71.906	115.1	75.23	96.837	86.792	97.627
85.07	65.994	77.525	90.205	66.939	86.86	72.926	77.915	84.977	52.434	59.327	60.69	69.545	69.78
127.37	204.02	265.58	172.71	224.1	210.83	203.01	178.24	186.28	155.11	165.35	137.97	145.54	188.61
118.49	148.41	136.59	87.13	117.46	115.99	153.3	109.59	164.15	139.96	159.66	190.69	150.82	168.88
113.26	181.07	145.7	52.465	150.61	119.6	88.015	63.761	106.13	217.92	237.4	221.12	233.71	220.02
102.16	151.43	209.53	103.1	167.22	159.6	122.5	108.28	119.57	137.3	168.86	138.41	151.1	192.12
140.04	170.6	197.77	126.66	186.48	156.36	173.25	145.85	175	122.75	149.96	159.88	137.2	216.34
153.72	113.35	106.13	105.83	92.683	102.24	108.94	85.936	114.72	129.92	133.41	114.09	137.91	98.426
126.25	86.912	116.9	97.953	110.03	115.56	74.609	104.52	80.976	134.04	136.28	75.689	141.34	68.695
126.25	162.16	194.02	141.93	157.93	159.22	177.69	145.06	147.89	152.52	166.82	190.77	124.76	174.59
97.919	162.16	194.02	117.38	155.49	126.2	138.25	119.66	147.89	168.86	209.95	183.11	155.17	172.46
158.08	183.53	285.73	167.51	263.97	214.68	156.92	172.38	153.16	133.34	185.87	146.28	143.17	127.2
101.15	155.22	197.66	108.19	176.27	121.76	174.18	111.66	168.36	159.01	154.93	146.28	109.74	126.35
62.017	105.51	136.49	86.173	108.51	100.62	110.67	103.5	117.06	60.02	84.466	90.085	69.267	108.44
54.985	91.512	81.491	85.896	76.401	96.982	90.675	100.23	97.692	92.991	72.918	111.64	77.242	98.021
93.624	98.733	162.1	130.02	171.28	152.42	93.876	127.82	102.36	109.27	105.79	92.303	93.709	87.816
113.04	59.933	99.434	62.95	85.828	73.455	55.455	75.279	50.403	53.717	61.092	74.67	62.333	93.92
143.36	108.32	99.434	101.8	119.51	128.07	101.97	116.09	79.774	65.317	72.037	84.181	86.902	101.2
165.3	281.63	286.27	241.74	290.65	256.41	229.15	215.63	223.44	244.51	251.01	306.87	195.39	224.52
140.36	131.67	163.42	111.45	141.41	145.49	133.66	122.75	138.68	161.95	175.23	144.27	145.15	170.55
177.03	204.76	188.36	180.33	198.59	170.34	183.92	155.81	165.39	153.83	162.06	187.92	162.9	162.73
147.58	135.81	136.25	157.16	157.03	140.69	124.58	162.26	113.26	101.14	115.12	132.45	102.95	130.35
113.83	92.976	72.982	83.91	86.283	85.535	72.738	78.452	82.683	109.41	111.82	70.301	122.48	103.07
108.25	65.679	86.901	93.683	86.283	90.975	77.325	92.085	84.65	51.904	43.996	53.737	58.914	69.239
66.459	48.903	44.136	74.075	47.749	49.154	77.325	67.346	84.65	42.685	30.548	53.737	41.995	69.297
117.61	90.89	116.45	88.046	105.23	90.686	111.02	94.64	110.58	76.296	71.992	87.743	75.06	67.457
125.74	128.32	103.12	109.78	97.98	97.216	170.04	115.97	178.14	128.83	95.659	125.75	107.83	118
69.042	61.706	30.336	33.038	35.205	37.545	62.969	25.649	86.174	85.602	67.88	92.471	73.415	102.58
40.657	60.421	38.312	31.853	35.205	34.443	67.442	24.766	82.799	75.57	70.332	67.164	84.226	75.027
44.73	34.232	38.312	34.928	28.912	34.934	42.232	34.428	55.994	39.022	38.577	66.4	43.827	96.168
58.977	62.654	27.753	38.591	46.726	59.896	41.54	43.444	44.686	66.849	70.958	92.297	86.345	86.695
55.023	57.307	31.397	38.591	47.525	57.245	38.461	43.444	35.744	57.136	45.986	77.143	62.973	72.249
52.031	52.763	37.899	60.678	48.765	57.245	54.086	58.612	46.296	40.479	45.253	61.143	51.796	49.257
23.216	36.41	46.856	55.641	46.988	61.416	32.108	54.1	24.246	14.431	17.525	53.301	17.828	24.13
29.595	31.378	49.01	49.082	46.988	45.203	32.108	49.285	23.579	13.111	12.316	22.306	10.591	16.761
25.634	33.41	22.741	36.45	24.982	31.006	20.184	31.299	20.183	59.259	53.044	26.303	66.798	29.488
63.713	73.183	63.612	59.359	59.2	72.595	33.928	62.535	32.412	113.54	86.532	98.025	82.404	65.438
63.713	58.945	60.088	82.993	62.515	76.263	55.447	74.36	48.24	60.278	82.273	68	77.082	58.208
108.16	79.924	116.58	128.45	118.37	105.73	150.22	98.233	151.94	81.839	93.833	141.74	98.388	121.82
76.457	72.463	71.291	68.107	86.385	91.545	137.34	71.058	156.78	94.823	86.406	141.74	54.798	141.34
85.879	113.9	83.11	150.63	108.44	126.29	97.57	127.03	137.55	113.2	104.23	168.84	103.36	148.44
114.08	77.376	68.987	110.54	96.406	93.775	90.105	105.24	98.968	53.737	46.351	100.96	68.121	130.69
66.007	51.29	37.342	69.339	55.94	59.205	57.148	79.946	49.094	28.495	40.997	48.892	43.055	56.708
88.411	160.9	137.93	96.369	140.41	132.6	119.24	114.5	102.79	213.74	173.12	153.37	242.2	123.11
108.48	175.98	242.12	195.92	234.77	200.42	172.95	205.25	129.19	182.54	220.53	143.86	185.24	123.11
156.03	99.88	135.87	87.092	120.64	101.63	64.658	85.402	69.663	81.153	98.278	111.14	83.386	77.709
122.29	56.237	106.62	68.205	93.203	69.781	92.608	80.656	95.742	68.461	53.4	96.633	67.809	93.995
89.11	79.177	64.531	83.47	61.856	95.011	87.551	78.75	88.114	109.46	100.31	104.27	99.745	66.729
43.367	118.26	49.704	56.876	50.153	61.906	80.483	52.519	88.861	152.88	134.18	133.4	139.72	104.17
112.3	128.8	198.93	153.09	151.37	143.34	111.18	148.18	100.76	126.94	134.18	121.24	135.52	69.117
93.55	42.303	109.3	58.654	64.939	64.343	51.745	60.758	69.623	54.715	62.474	73.314	61.969	94.282
93.55	48.932	108.63	67.128	71.327	64.343	51.745	60.758	69.623	46.048	54.493	69.849	48.6	66.969
99.659	58.534	120.46	106.54	117.12	96.881	79.087	101.54	88.243	44.472	40.559	54.875	66.131	67.482
155.42	78.417	114.17	90.865	92.099	86.265	57.851	88.218	45.969	104.95	114.76	62.064	117.92	68.188
201.88	88.997	126.32	147.67	180.41	182.73	83.868	176.63	85.596	106.47	123.28	79.131	123.45	79.356
140.69	127.95	138.28	86.908	114.07	100.32	90.309	84.371	94.136	113.98	142.89	118.45	142.93	125.56
156.78	93.97	138.28	74.73	110.22	98.41	107.93	80.214	106.38	113.98	123.16	121.86	109.96	136.75
139.41	114.05	99.77	64.776	82.561	90.096	63.934	70.404	75.065	124.52	150.99	169.96	175.09	138.83
113.25	96.312	167.52	130.74	139.67	125.79	180.53	153.31	172.87	81.469	80.942	170.31	90.015	139.39
112.13	96.445	168.22	133.21	148.54	127.52	95.996	163.43	97.133	53.12	61.879	109.76	60.266	90.5
112.13	104.42	109.92	133.21	112.61	135.79	85.619	129.32	78.947	119.77	127.88	80.702	122.94	83.897
112.07	116.18	132.46	125.14	142.3	127	97.538	111.85	100.53	114.68	170.59	74.7	136.2	97.639
249.31	251.25	353.99	212.27	296.35	270.84	246.66	227.01	250.36	167.67	178.96	233.98	186.11	210.48
102.69	151.48	198.23	121.84	174.42	122.65	172.39	151.68	208.92	126.35	135.12	186.19	120.85	222.98
178.78	207.02	198.46	142.36	172.23	172.16	140.68	149.29	144.77	194.62	148.23	252.88	151.25	215.19
131.55	124.48	178.95	108.85	131.96	115.53	151.88	107.13	141.68	116.32	107.96	143.88	97.368	166.73
109.39	90.364	63.783	89.503	65.514	69.433	155.76	69.299	144.72	91.291	86.736	78.786	99.088	89.197
94.527	52.951	55.616	55.143	51.263	51.055	60.313	58.693	46.081	60.603	68.28	44.834	99.088	56.529
76.434	92.503	104.33	128.17	118.95	105.32	114.57	113.38	111.74	84.246	92.555	73.853	123.15	78.978
68.264	94.499	104.33	81.26	89.622	80.306	122.78	67.786	142.34	92.922	96.946	68.789	88.651	84.524
91.018	53.627	92.925	72.088	54.929	62.803	79.997	67.786	83.246	50.74	61.982	55.489	59.161	97.19
82.201	70.371	71.222	89.195	69.796	74.548	98.239	92.563	105.17	61.661	55.255	72.351	61.933	86.092
57.4	81.328	66.137	78.512	63.163	69.55	71.24	72.156	84.613	70.231	78.849	87.211	61.933	120.72
85.906	72.523	81.064	54.681	84.06	73.249	69.817	61.051	90.693	79.617	90.155	103.08	65.295	129.19
89.715	124.32	127.64	77.196	108.93	103.84	93.415	77.691	96.826	177.99	158.26	146.74	125.71	189.68
151.39	160.25	165.65	177.44	173.82	195.01	219.85	151.71	221.25	102.91	97.26	155.85	73.975	168.38
93.989	168.23	262.12	120.22	204.12	134.65	214.43	123.63	214.86	153.71	111.64	240.6	90.661	182.1
166.22	190.19	283.9	143.74	221.6	208.75	167.79	135.82	158.75	184.82	211.06	245.65	183.6	259.47
107.24	97.336	118.63	83.562	112.1	116.82	95.877	94.099	82.119	69.255	76.78	111.46	69.777	114.07
67.87	38.128	103.2	55.209	60.727	60.855	35.584	52.184	26.554	22.995	22.431	29.467	33.61	24.14
129.19	124.38	133.63	98.612	107.24	121.05	73.762	99.381	89.002	130.34	111.13	128.8	110.53	121.93
83.387	146.06	170.43	94.408	154.28	133.85	140.29	105.78	146.48	144.65	128.58	204.88	134.81	224.87
85.093	107.29	91.471	88.937	112.19	134.34	102.09	91.628	102.43	133.27	141.07	92.622	144.62	96.654
92.621	146.96	130.03	126.49	112.19	134.34	134.05	134.93	122.23	146.88	155.19	106.24	161.19	120.29
212.02	139.86	155.53	123.15	147.07	139.74	103.32	119.85	100.93	148	117.02	137.45	100.43	113.71
104.79	95.938	127.67	112.76	128.83	124.61	100.66	112.98	79.276	115.36	114.52	86.688	91.146	84.018
173.21	95.348	180.46	102.6	117.1	117.36	98.982	91.401	103.97	137.94	147.9	119.47	132.18	98.887
161.27	146.21	139.53	119.99	127.73	132.87	103.69	133.28	109.89	168.53	184.81	146.15	176.8	134.26
161.27	124.35	130.01	108.17	108.22	123.41	148.29	106.76	148.53	142.6	139.7	134.65	149.27	178.43
121.46	129.2	160.57	128.04	125.85	127.64	131.26	132.06	118.95	134.45	121.99	134.65	112.19	175.63
88.194	47.641	55.008	74.612	56.147	76.46	60.22	61.501	56.064	93.763	102.31	66.836	132.74	72.403
83.773	58.013	59.172	57.259	55.666	69.687	56.214	62.494	56.273	86.23	95.457	68.418	91.042	61.152
96.86	90.742	110.4	70.782	83.583	75.972	66.949	73.312	65.486	79.224	67.589	102.55	100.2	105.83
88.207	103.05	110.4	94.933	92.615	94.781	85.303	99.925	84.719	79.224	67.589	96.801	71.704	82.329
47.91	31.342	41.513	42.771	37.6	40.238	26.928	44.433	20.16	19.679	16.723	19.455	19.824	15.523
52.319	36.491	37.774	57.63	44.449	48.156	30.782	54.273	24.597	26.705	16.746	24.522	12.5	16.979
58.88	30.12	35.471	50.572	34.566	33.264	30.834	46.241	29.62	27.164	11.561	22.833	16.2	19.92
23.089	26.566	55.277	56.924	34.309	42.179	39.568	42.541	29.62	19.149	15.502	22.833	16.2	24.933
35.134	32.665	47.739	49.805	32.115	46.265	25.68	37.603	21.338	37.798	45.225	27.797	52.127	18.914
38.328	43.086	33.011	37.714	31.343	45.89	25.68	37.603	21.338	113.97	66.227	37.831	106.69	27.429
82.051	83.875	50.469	113.88	67.307	93.755	83.251	108.97	69.995	135.24	67.451	119.96	133.11	123.32
86.909	112.04	80.065	120.51	71.886	93.755	83.251	108.97	73.274	87.861	83.748	111.92	79.44	104.42
51.201	75.275	82.971	67.684	89.301	69.908	48.942	64.941	63.925	96.037	100.63	94.141	92.041	80.212
96.053	75.275	82.971	93.528	89.301	89.821	106.75	91.575	93.921	69.148	100.63	118.25	89.197	112.48
86.634	86.925	111.65	104.48	97.657	80.372	117.98	96.515	114.06	71.178	59.041	97.013	58.736	98.396
87.437	99.407	101.51	122.84	123.12	116.61	138.06	120.59	138.9	78.004	73.822	86.011	96.792	93.784
78.384	149.28	154.23	147.39	164.61	139.06	127.39	148.77	118.27	115.32	136.9	112.24	144.51	89.554
122.23	148.84	117.79	139.17	116.05	135.01	92.146	142.05	80.727	171.39	162.75	179.95	145.27	109.95
97.609	90.64	95.145	105.05	79.283	91.405	92.146	101.4	89.041	96.769	90.601	111.89	106.37	140.64
67.091	48.248	32.942	36.916	37.482	41.128	53.183	37.519	48.253	38.749	47.361	57.218	45.487	48.177
71.927	59.54	58.102	73.345	64.215	62.285	60.615	73.384	65.705	56.159	73.998	61.83	70.083	75.06
71.927	83.38	81.737	73.345	80.419	71.353	79.144	84.116	73.285	93.501	105.08	78.94	101.07	84.778
70.701	107.53	123.8	91.053	114.4	95.217	84.059	86.624	68.535	139.06	142.24	83.54	140.19	66.343
130.05	108.35	127.74	82.493	100.86	95.222	111.41	91.538	112.85	114.87	147.68	93.314	125.75	93.904
114.36	73.815	105.25	84.925	86.113	79.979	109.54	79.885	122.55	83.562	74.785	92.627	66.758	97.004
127.21	126.85	95.536	118.09	115.61	105.75	131.16	117.92	122.55	88.27	77.368	130.55	100.6	148.79
79.456	99.949	121.09	122.33	129.44	119.73	66.862	133.27	64.017	98.452	118.93	67.78	109.83	58.485
89.711	70.395	101.2	104.15	94.868	92.235	60.322	83.304	48.449	95.001	68.922	80.565	88.044	48.963
59.117	89.785	102.71	72.061	91.457	92.235	49.23	71.955	48.301	85.148	161.45	51.678	151.33	65.461
49.332	38.758	36.384	60.441	41.314	44.387	54.427	53.865	38.711	43.132	45.482	64.165	42.747	46.281
55.872	95.704	93.181	90.398	99.727	82.803	93.54	83.915	95.396	70.28	66.046	103.69	60.241	90.574
63.539	137.3	102.34	89.748	122.77	116.48	70.868	100.83	63.925	145.15	139.51	117.72	118.82	121.27
95.966	70.986	76.895	45.48	56.306	65.265	47.853	38.184	48.651	107.04	105.09	93.044	118.82	65.594
134.56	73.586	73.08	91.124	77.44	90.676	70.269	99.575	75.264	103.68	90.625	107.95	82.568	101.69
81.829	44.663	44.907	56.729	50.261	56.192	34.34	57.952	42.883	41.191	24.732	47.092	34.323	33.065
99.805	104.82	97.586	107.38	102.51	104.27	88.76	93.645	67.156	169.22	128.48	92.561	170.55	84.222
88.817	164.77	100.49	99.216	105.07	107.2	119.73	106.08	97.328	85.533	92.157	198.92	94.982	142.52
87.366	109.17	96.365	84.798	97.924	104.36	74.915	95.989	79.089	108.04	86.122	107.06	98.244	92.596
87.366	104.85	69.157	89.002	72.155	87.09	100.92	86.43	79.089	104.33	82.408	127.11	101.04	126.95
71.984	50.751	69.157	73.972	72.155	63.008	79.797	73.754	68.87	58.499	61.244	57.903	119.6	72.568
93.477	255.32	347.6	218.41	240.51	226.16	237.34	218.03	222.88	180.04	158.8	206.68	175.17	156.45
150.32	266.04	209.37	161.88	199.91	181.01	160.64	162	146.4	181.34	178.28	206.68	189.11	156.45
72.108	92.556	72.936	76.332	83.213	95.073	56.112	79.141	43.4	129.03	134.08	51.211	140.16	38.878
61.643	74.84	115.74	60.16	83.213	89.637	33.973	79.141	34.244	66.286	105.4	50.724	119.83	57.64
97.517	67.903	64.901	108.42	75.245	99.65	60.489	98.791	62.63	66.286	70.151	61.274	76.514	64.383
85.162	106.77	133.7	127.22	128.39	127.43	69.719	125.92	63.825	96.388	87.569	86.37	98.047	62.149
80.294	78.082	110.46	114.71	96.094	96.199	102.1	97.612	90.034	47.445	57.04	77.439	43.398	52.867
63.056	74.204	97.492	92.974	93.439	87.522	112.61	91.789	92.498	56.759	86.253	76.124	77.774	76.882
63.056	55.898	86.842	53.554	89.992	64.646	46.729	56.596	43.744	56.759	86.253	68.63	66.337	52.915
66.514	36.584	38.871	41.262	39.23	31.067	42.854	35.79	40.052	40.554	39.41	58.288	43.339	64.578
117.23	112.83	119.23	130.42	128.09	128.35	96.518	123.57	91.591	122.47	110.14	130.44	99.063	119.45
146.68	112.83	176.79	146.78	152.64	160.36	105.82	132.2	121.29	156.08	160.31	113.19	153.28	86.859
116.09	116.67	111.42	167.81	140.92	156.21	110	178.42	107.88	115.28	144.02	88.521	127.23	82.054
61.561	61.461	49.183	67.556	59.935	64.318	65.629	61.054	73.338	73.671	94.981	66.613	114.5	75.011
78.901	75.745	76.621	108.75	102.89	107.13	101.44	127.07	114.49	66.135	77.438	60.452	71.488	99.474
78.901	97.967	91.6	65.984	113.97	100.81	89.935	71.811	81.37	120.94	129.09	119.76	133.09	96.688
125.69	97.967	97.836	92.467	69.889	81.052	108.67	74.736	98.895	130.84	120.47	116.07	133.09	96.688
73.754	70.441	65.547	60.091	62.411	69.671	83.281	65.669	94.012	50.975	58.595	110.38	66.813	131.32
59.999	73.895	99.049	112.78	105.36	91.935	113.25	105.77	90.295	49.241	50.509	59.2	56.771	69.539
57.303	62.795	65.281	62.87	66.887	67.592	52.773	67.188	65.576	58.426	68.309	42.173	60.02	59.151
102.71	133.75	127.71	132.77	112.38	129.04	123.92	129.83	171.86	109.36	101.82	123.41	109.24	92.26
120.19	87.644	72.145	112.25	80.001	82.82	107.06	103.42	119.04	65.495	54.209	108.04	69.477	85.56
106.94	81.727	68.375	74.202	80.765	82.82	131.84	73.762	117.14	48.351	46.604	102.06	61.754	64.557
156.07	58.049	81.86	72.615	64.52	66.527	91.468	68.332	99.331	55.912	53.099	53.881	51.115	77.031
38.146	46.238	44.489	58.279	53.862	51.397	50.327	57.099	30.937	60.448	88.723	35.921	87.409	47.795
32.816	23.77	39.172	50.563	33.497	34.808	23.712	47.66	18.966	13.65	9.3588	17.598	10.41	10.833
29.36	36.25	60.36	52.586	52.227	52.026	23.98	49.848	23.389	17.128	15.92	29.991	16.731	17.83
39.48	33.165	60.36	73.139	49.151	67.787	28.977	60.197	24.172	18.694	15.365	24.761	15.607	17.83
24.881	43.741	63.252	57.767	72.93	69.281	37.073	70.656	27.676	19.573	20.965	28.597	16.328	18.941
48.161	50.557	42.3	85.739	66.414	88.339	44.257	87.093	38.54	28.011	21.112	37.285	16.328	19.778
49.462	45.533	65.044	75.521	82.245	72.541	35.112	87.104	28.62	20.763	18.046	29.127	16.231	19.515
26.703	21.278	41.367	33.974	35.952	41.604	17.989	34.325	16.15	12.086	11.441	22	11.216	12.528
28.974	21.288	39.63	32.031	31.862	32.125	23.691	32.454	20.311	11.805	10.893	20.184	12.456	13.838
52.395	74.219	51.317	73.671	47.13	61.643	57.524	71.086	46.305	87.324	47.818	85.405	85.263	79.327
67.851	101.93	62.288	85.198	67.814	80.902	76.702	86.002	76.128	119.32	84.975	109.78	122.3	126.1
37.024	22.894	12.198	44.416	23.475	39.083	31.497	35.425	43.396	14.49	10.129	30.855	19.289	60.565
74.026	69.061	37.806	89.739	55.678	57.619	146.23	86.131	155.48	34.353	31.581	85.146	22.855	101
28.286	34.192	25.985	31.756	31.91	35.632	25.858	30.798	23.81	24.872	33.321	46.935	37.274	59.678
46.519	89.931	89.426	63.028	53.272	58.934	114.57	64.794	108.44	122.49	102.61	87.127	90.45	87.7
56.312	101.49	92.174	121.95	89.879	91.863	97.82	111.68	106.06	130.54	137.9	87.127	122.67	77.229
71.505	46.215	71.303	69.06	58.406	59.048	58.65	58.714	61.669	41.447	36.853	59.392	29.717	48.714
64.136	76.317	127.9	107.76	146.43	95.16	137.65	91.612	115.83	51.401	46.503	100.42	36.194	83.007
131.15	76.317	135.58	107.76	124.37	95.16	137.65	86.767	130.6	65.318	49.188	85.189	64.431	98.705
89.34	110.97	105.05	106.88	120.08	110.28	81.257	121.25	82.208	152.45	112.78	110.88	132.98	84.389
47.197	80.276	99.202	70.629	99	76.936	74.594	82.071	79.147	98.639	104.58	73.34	113.6	84.364
77.784	64.727	46.935	86.382	49.557	56.61	138.64	82.175	127.4	50.448	44.873	109.25	78.728	93.34
61.162	53.854	61.415	52.055	49.515	46.745	102.71	55.772	131.55	50.448	47.537	73.508	73.382	49.602
55.121	35.193	48.275	48.96	38.8	46.25	34.861	40.452	37.211	33.17	30.634	34.167	40.767	49.602
55.845	34.001	46.874	53.711	53.139	55.452	46.845	53.621	43.95	13.563	14.942	20.001	11.151	31.863
63.066	69.717	56.857	73.065	62.3	62.172	89.148	71.681	87.193	70.866	45.716	95.796	61.411	91.235
88.962	76.082	84.441	78.816	62.3	77.853	137.53	83.208	158.07	70.866	46.035	76.321	64.105	100.82
56.791	91.156	84.441	76.483	80.019	101.58	97.634	78.548	86.527	79.35	88.155	81.135	108.65	89.186
76.748	62.354	62.04	84.724	77.566	84.617	104.08	82.011	97.537	33.603	19.095	76.635	15.584	89.186
63.949	48.787	57.197	76.929	59.277	57.495	92.562	80.857	66.416	52.355	45.598	59.31	35.885	61.546
69.617	48.787	64.842	83.166	63.885	53.484	93.023	89.029	111.31	60.072	49.132	46.511	69.229	42.657
92.708	98.412	75.266	70.446	79.459	77.618	93.023	61.433	111.31	99.557	95.88	85.441	89.323	98.497
75.851	126.2	130.5	73.511	123.04	127.62	157.89	96.517	140.98	111.5	105.9	135.14	102.37	144.95
76.509	107.38	96.062	108.22	106.43	103.48	84.939	111.58	80.911	91.356	89.006	138.24	80.445	82.75
51.518	50.924	70.138	77.266	57.315	50.199	51.063	69.394	46.58	62.912	64.928	62.995	74.559	75.195
78.786	77.351	81.386	69.916	71.254	75.97	107.34	75.497	119.12	77.855	82.777	90.892	114.55	120.09
94.788	124.95	143.37	167.08	139.43	144.19	157.23	150.47	141.11	110.44	85.738	110.02	123.26	112.66
104.67	95.838	93.186	125.09	129.06	107.34	118.42	110.55	120.57	98.108	76.293	104.91	102.35	101.69
102.33	73.739	116.56	125.09	116.68	101.79	87.383	129.49	103.98	51.35	47.144	71.259	38.541	73.94
69.928	69.535	58.614	82.985	65.536	67.665	82.199	80.406	90.324	51.588	39.854	56.081	33.584	79.242
72.377	88.461	74.11	112.53	99.906	99.143	108.25	121.17	111.49	61.104	57.482	58.238	57.014	74.827
92.751	87.433	140.8	109.58	96.134	101.02	78.035	113.01	84.017	84.965	68.932	78.873	67.018	62.751
110.21	92.453	67.883	115.59	78.467	101.02	145.14	90.103	142.81	90.974	76.27	111.08	85.038	112.39
62.436	119.95	157.35	123.3	166.48	139.23	116.73	142.11	143.65	131.74	118.37	117	110.71	144.7
67.381	120.49	156.33	95.137	148.52	126.08	100.27	122.9	107.87	183.95	200.5	96.287	165.34	84.486
129.21	59.947	83.106	92.477	81.325	106.19	55.603	78.248	58.513	70.452	75.779	48.18	73.022	38.666
136.64	86.503	149.51	114.03	148.78	126.57	78.842	111.6	65.995	88.295	118.02	76.618	95.651	88.406
110.82	107.69	90.849	133.29	107.94	115.39	120.12	95.026	125.35	73.665	75.942	161.52	95.651	176.02
176.73	163.79	148.86	153.17	141.88	151.57	161.44	146.7	164.1	147.57	144.12	173.38	131.28	149.88
124.44	158.3	141.84	98.601	141.88	121.19	57.42	112.86	64.987	174.72	171.88	90.93	219.16	88.972
122.82	158.44	141.84	148.23	145.17	152.24	101.11	146.47	83.563	157.76	188.12	98.94	218.83	80.452
87.124	84.566	104.48	138.21	121.87	131.02	93.214	136.31	87.681	58.609	51.849	81.184	53.298	117.78
69.319	92.884	115.25	107.84	133.73	131.45	121.27	120.42	118.58	63.926	64.897	95.778	61.43	84.192
104.06	59.378	70.608	74.216	75.393	67.165	64.175	57.303	74.068	61.341	66.77	62.122	67.726	55.412
87.912	90.773	83.813	98.858	85.764	81.908	110.05	96.395	120.73	74.04	71.736	73.184	97.853	94.188
78.734	53.877	83.813	71.989	69.094	77.617	79.818	64.629	69.07	68.792	71.736	46.138	79.037	47.203
87.339	153.56	187.47	166.5	176.71	162.1	117.97	194.84	132.05	130.39	90.927	113.81	88.453	116.89
104.28	104.01	156.63	131.39	141.26	122.95	186.97	127.79	165.77	161.62	167.7	130.04	148.88	153.32
111.77	123.36	142.61	145.07	148.79	145.04	237.16	131.53	229.97	88.153	119.63	148.67	112.83	136.87
111.77	107.61	174.74	126.42	148.79	145.04	117.74	131.53	127.25	76.137	98.995	145.56	99.813	133.71
103.27	133.09	132.44	126.42	156.01	145.07	119.52	142.55	114.82	122.27	126.71	145.56	108.93	133.71
71.646	87.797	78.487	76.064	62.81	89.774	86.139	79.279	112.84	80.723	86.595	49.569	104.68	64.564
72.278	72.772	138.09	87.055	111.64	88.195	69.264	89.494	71.924	79.17	76.324	64.891	82.377	66.384
63.491	44.005	96.633	85.716	75.233	63.139	56.097	55.34	81.691	36.604	44.728	32.021	31.705	63.695
45.422	49.64	42.451	49.988	43.816	63.139	53.99	51.489	78.107	56.985	49.089	50.844	45.889	74.803
45.422	37.787	17.761	19.713	16.017	24.354	39.625	21.565	47.806	54.616	46.941	78.14	60.25	77.88
32.376	37.787	31.296	32.75	20.591	24.522	49.689	24.439	49.171	49.236	58.793	32.294	55.108	58.812
49.211	42.385	36.956	51.694	33.804	35.086	59.859	38.715	67.906	46.513	45.386	42.791	56.368	79.122
30.112	22.321	27.374	28.352	24.978	24.679	32.563	22.463	31.644	16.313	18.224	28.971	19.997	41.457
24.572	20.242	29.047	27.759	26.105	24.982	26.906	27.594	29.27	13.087	13.766	18.913	13.675	36.583
21.866	31.067	16.762	21.47	30.875	30.722	31.082	23.054	43.815	22.333	17.087	63.512	24.666	72.206
22.156	23.868	31.518	18.22	13.947	25.68	31.082	10.791	43.815	10.588	11.114	35.261	11.023	70.728
27.939	29.528	31.673	39.184	32.489	37.54	41.222	44.464	54.095	19.429	17.798	33.505	11.399	63.508
22.198	16.399	14.758	24.491	18.12	24.626	16.59	22.086	14.891	19.468	13.87	19.88	24.578	25.956
23.871	13.115	13.443	24.491	15.852	16.86	14.914	15.342	15.106	16.433	11.728	19.88	11.63	31.004
27.219	11.261	12.703	17.254	11.204	15.568	11.468	12.817	11.99	10.354	8.7616	11.826	11.16	16.05
22.322	18.405	14.405	24.725	13.991	17.757	23.878	17.325	23.999	22.97	18.639	16.313	41.99	28.401
24.844	15.977	14.783	31.401	17.208	18.683	21.557	19.433	20.455	15.549	11.308	16.999	24.963	23.656
22.481	20.289	23.395	40.761	22.251	25.881	30.298	25.68	30.898	20.422	13.013	21.685	18.989	27.953
14.418	15.673	17.718	40.761	20.176	24.157	26.019	22.303	23.527	11.75	9.7982	23.756	23.227	42.076
21.08	30.705	18.73	36.659	22.663	35.626	30.785	25.646	37.72	43.708	25.435	29.99	28.515	42.28
19.866	18.771	15.445	36.659	16.57	15.72	15.522	19.454	14.49	18.925	15.464	22.699	23.429	35.702
16.35	13.48	11.261	38.657	11.03	10.478	10.558	15.68	11.51	17.448	12.43	17.3	28.52	15.329
29.478	13.916	13.917	52.165	11.453	19.498	13.863	18.039	8.9952	19.849	17.09	32.842	27.627	17.309
42.302	35.216	24.7	45.797	32.584	36.883	22.954	43.905	31.555	44.967	27.682	27.97	48.673	43.723
39.919	62.623	22.842	44.393	36.071	36.883	27.398	37.576	31.555	112.35	127.28	64.857	111.97	67.648
84.709	70.094	37.765	79.674	56.471	65.598	65.03	69.033	60.013	104.81	92.751	107.7	128.12	132.5
129.45	154.16	160.22	117.85	148.51	135.81	101.91	136.44	97.925	156.88	184.46	124.65	137.8	115.67
52.98	102.41	68.576	85.291	70.416	75.83	101.91	79.4	109.25	82.684	89.832	66.485	58.628	70.193
76.915	98.722	94.965	97.892	117.42	96.065	116.75	107.87	118.99	77.486	101.52	71.768	81.54	93.992
83.031	76.802	131.04	86.003	103.69	96.065	116.75	87.442	118.99	81.901	67.659	64.039	88.004	83.21
28.482	19.088	21.997	31.479	27.382	36.629	26.537	35.164	22.444	9.7313	12.151	11.477	20.467	30.239
76.637	48.974	32.678	65.416	42.553	52.897	59.472	60.385	60.874	27.989	31.728	46.257	32.466	40.57
49.713	100.63	80.055	78.195	82.584	75.243	59.848	86.174	45.779	102.33	77.831	117.54	104.18	114.39
74.045	114.02	101.07	82.329	96.64	97.144	103.71	86.174	84.435	112.8	94.947	92.81	84.77	96.388
53.785	78.843	58.25	78.62	71.481	72.858	102	74.489	112.65	88.225	94.947	83.839	84.77	109.38
52.146	105.33	103.2	68.197	92.739	95.627	77.882	58.44	68.33	120.4	150.4	81.52	124.56	71.444
70.641	45.481	50.303	54.306	52.976	53.334	63.177	48.403	68.33	56.667	67.355	48.644	87.959	57.243
130.31	66.907	70.734	113.4	80.233	96.475	63.177	104.7	86.948	66.469	57.279	64.298	81.918	91.378
70.561	63.724	77.544	109.45	80.233	92.549	83.507	89.215	95.011	66.469	57.279	53.738	81.918	91.378
116.97	110.96	87.421	115.55	103.64	111.9	111.73	110.69	106.44	83.651	83.681	106.72	83.803	98.506
36.546	37.908	65.285	78.003	74.973	66.309	58.052	69.946	56.717	42.1	33.596	28.974	43.837	28.113
98.411	78.408	79.39	103.47	97.085	94.997	59.591	99.175	63.55	70.844	85.06	65.254	86.477	62.2
98.411	113.6	102.59	98.646	97.085	94.997	123.11	103.03	106.68	113.2	108.01	109.02	120.9	88.364
100.63	65.645	95.001	92.757	72.354	63.618	103.55	93.549	96.398	61.74	57.005	81.572	55.178	88.364
63.205	58.004	87.749	83.071	76.625	62.403	60.551	65.839	51.074	32.689	45.786	29.923	33.576	48.416
73.714	62.594	145.08	127.97	138.41	121.36	84.72	133.33	86.074	41.815	49.487	42.496	79.405	54.048
97.49	53.288	62.987	69.662	60.519	73.55	74.611	64.626	75.227	50.879	31.647	72.21	54.688	68.69
127.76	131.09	200.74	126.59	182.74	133.65	151.77	135.92	159.16	118.8	105.23	116.77	102.93	122.97
47.326	55.973	38.935	52.136	65.26	55.851	55.296	51.153	46.043	49.226	55.4	55.631	51.81	74.158
130.78	100.52	63.499	58.241	72.312	60.505	92.406	61.868	76.233	98.331	92.174	150.57	109.94	116.9
88.072	124.27	99.005	105.72	101.46	102.91	102.19	109.44	113.05	144.55	135.26	141.59	152.6	116.9
74.365	69.588	46.476	88.792	73.122	82.345	68.003	72.038	80.826	110.15	84.027	72.184	95.3	111.13
69.022	152.36	101.81	117.79	144.3	177.75	96.844	144.52	92.792	149.03	167.89	118.59	169.25	112.59
69.022	34.403	60.706	49.106	65.99	72.86	61.143	52.807	65.441	49.632	38.212	40.511	52.64	44.521
114.27	76.779	83.827	98.409	72.552	80.767	80.961	96.515	86.856	67.675	54.44	52.702	88.382	53.179
74.069	61.916	65.617	76.414	80.283	74.86	90.701	73.926	90.914	67.675	54.44	54.354	79.282	49.304
78.275	46.031	65.886	80.207	80.283	82.629	32.814	70.194	36.849	53.534	62.224	29.725	43.544	33.788
72.624	65.166	131.27	102.09	94.168	81.884	61.969	78.16	70.909	51.216	62.224	43.203	51.191	45.94
70.964	77.743	73.398	69.883	70.218	73.202	65.323	78.16	69.171	73.439	70.174	57.245	61.684	53.645
49.685	46.359	48.562	62.669	59.256	59.175	57.576	56.689	61.986	47.684	50.969	64.629	49.744	75.921
50.031	46.359	48.477	62.669	48.208	47.874	69.051	53.437	70.982	41.841	23.059	51.932	81.609	87.496
35.448	36.855	35.926	38.568	25.687	29.784	59.802	34.779	68.422	41.119	45.777	48.609	40.945	87.496
42.541	36.688	26.103	51.296	35.592	45.5	31.633	39.279	30.731	34.897	27.282	32.499	40.945	44.737
45.903	63.688	34.487	60.696	46.041	56.501	55.69	67.454	58.181	89.075	68.839	106.72	67.262	102.05
32.132	36.639	23.552	21.273	25.37	29.111	30.941	20.269	35.273	29.325	23.96	43.5	49.434	102.05
29.33	52.411	43.282	50.098	48.119	47.637	34.37	43.253	32.113	54.225	71.027	39.405	76.922	46.998
37.71	35.056	43.56	51.821	52.85	71.871	34.918	54.612	31.76	15.341	11.28	26.099	38.668	34.313
34.587	27.456	21.72	37.738	31.162	36.217	27.034	39.831	25.568	15.196	11.594	26.512	21.664	43.738
37.914	32.742	26.809	43.488	38.906	40.642	33.257	47.492	32.55	40.535	48.798	24.236	36.829	21.875
36.134	62.446	72.007	38.882	66.226	61.914	39.438	35.447	35.605	89.367	75.908	62.548	102.18	61.867
82.685	79.636	75.517	93.177	87.425	78.642	83.46	92.451	74.754	109.24	78.292	68.355	102.18	65.971
39.283	64.976	61.222	89.006	67.338	71.79	83.46	85.972	74.754	50.751	63.348	64.577	77.556	75.305
86.927	56.287	39.605	56.094	58.176	49.621	88.063	49.204	107.14	74.889	64.961	93.855	88.954	130.94
89.652	130.53	96.438	122.46	116.11	164.51	150.68	141.81	158.66	147.18	154.86	110.45	147.94	74.827
95.501	71.159	57.243	94.235	75.777	68.965	102.62	77.509	109.81	84.903	52.552	118.74	46.821	97.372
149.04	101.88	74.007	131.95	84.257	103.03	151.79	119.29	161.23	88.651	70.792	87.741	86.625	88.985
45.124	56.946	54.972	81.195	64.301	66.582	77.302	80.367	80.306	76.481	72.638	51.779	92.025	27.985
52.773	67.667	99.051	81.195	90.444	90.035	66.309	84.055	80.931	74.748	78.366	50.427	80.909	66.698
107.43	107.01	83.248	97.217	90.444	79.024	104.07	95.211	106.78	128.68	79.409	147.44	95.03	103.39
70.784	57.176	64.578	129.64	71.174	104.49	83.892	91.637	84.79	54.773	40.6	50.183	50.17	58.411
114.58	91.722	134.77	113.79	103.73	104.49	115.94	94.497	121.54	81.103	65.493	68.33	66.812	51.174
62.405	79.754	92.359	91.004	91.793	86.454	57.314	89.838	54.141	74.197	47.573	45.938	55.356	62.723
49.167	105.8	106	107.02	100.7	115.96	118.01	99.055	132.39	91.72	85.897	134.59	77.961	126.21
58.223	88.837	90.607	103.98	99.365	100.02	125.68	104.14	132.39	110.1	85.897	88.447	96.987	121.88
33.054	41.995	55.355	64.8	47.697	43.352	55.071	45.873	65.679	86.064	68.435	51.161	79.56	52.744
45.283	60.914	37.316	52.353	42.138	43.811	68.226	55.86	96.535	65.571	69.028	54.082	84.863	117.47
43.635	44.681	18.825	17.395	14.248	16.442	83.621	21.24	128.71	36.312	48.492	57.459	51.09	117.47
26.258	40.257	18.975	21.651	19.079	23.667	43.417	22.547	51.068	28.105	27.415	79.591	47.464	95.532
31.849	22.09	20.837	34.919	22.04	23.855	31.263	30.976	36.315	14.244	9.8793	26.085	13.956	35.845
31.849	22.09	21.679	43.052	21.706	30.219	34.439	37.972	45.353	12.255	9.8793	24.841	14.36	35.845
18.982	27.713	24.389	57.284	27.39	36.228	34.703	39.078	34.319	16.477	14.741	24.847	21.543	50.555
28.848	32.809	29.248	80.542	39.912	38.295	34.703	45.54	36.62	23.949	19.395	35.337	46.999	27.698
30.95	34.009	28.505	55.17	40.083	34.957	24.086	46.838	20.984	23.949	19.395	35.337	28.73	30.778
79.801	53.383	49.358	88.037	83.427	73.959	36.206	83.321	40.402	30.615	28.775	28.539	22.71	22.185
25.618	44.56	55.327	66.656	72.831	72.157	37.151	77.431	40.402	22.343	21.399	30.617	21.075	22.697
16.997	31.497	36.836	59	43.874	51.084	35.15	55.224	28.253	14.495	13.995	23.26	36.078	13.121
45.783	47.815	49.749	85.988	64.711	70.912	59.083	86.096	51.727	21.127	19.018	28.985	28.837	25.87
22.101	17.519	23.111	28.138	16.618	20.337	18.093	28.229	15.365	19.583	11.011	10.914	27.795	9.5057
23.663	17.644	17.752	25.229	16.618	21.492	15.94	30.08	16.063	6.0821	6.3293	10.914	16.87	9.5057
29.546	53.159	54.631	106.43	70.773	72.333	59.648	85.641	42.294	24.06	26.158	51.355	18.38	35.358
29.197	44.72	62.815	76.519	70.088	82.655	43.581	77.57	40.396	21.932	24.715	26.999	20.732	15.889
99.183	44.72	65.818	86.821	70.088	82.655	43.581	77.57	40.396	25.584	24.715	28.966	34.298	27.666
49.719	38.094	52.615	76.368	51.706	69.403	36.816	69.576	36.346	18.367	14.701	27.732	21.653	21.252
40.733	64.538	84.501	117.7	82.32	89.171	67.2	118.65	60.129	25.961	26	29.426	21.653	26.985
42.229	36.381	48.232	76.531	56.227	48.759	35.059	67.256	39.86	20.981	14.967	52.857	14.264	34.946
27.663	30.584	39.963	46.238	31.444	45.983	24.87	40.493	24.994	13.873	12.057	52.857	10.701	23.96
25.791	31.795	35.161	50.873	26.756	31.892	25.542	29.267	27.986	36.981	22.61	57.641	29.179	23.96
74.166	51.871	45.655	91.274	102.35	145.95	39.163	103.65	29.547	26.817	15.62	46.526	25.98	60.696
69.646	40.597	60.241	91.274	57.249	73.426	40.83	65.991	47.693	17.597	14.416	28.746	43.917	36.345
19.218	58.433	39.107	61.511	67.987	76.465	60.262	35.036	55.37	24.947	24.635	82.99	49.613	64.578
30.945	58.433	48.376	71.987	59.81	53.923	60.262	45.856	55.37	48.324	29.483	93.169	87.423	41.212
26.351	38.809	37.789	60.454	42.098	46.519	43.228	50.624	37.852	26.133	28.054	34.868	37.414	34.473
34.859	37.41	52.126	60.454	42.013	51.67	36.979	67.88	33.954	15.408	18.89	34.868	23.98	32.985
34.732	41.13	52.126	71.408	57.894	56.398	36.685	72.888	37.799	28.152	24.61	39.433	25.268	22.871
49.218	38.425	32.065	61.592	41.778	40.174	26.346	47.024	24.025	35.937	29.823	29.874	36.335	23.354
33.391	22.707	27.119	55.202	31.067	38.195	25.407	43.234	20.927	25.633	20.729	23.312	34.65	23.354
37.853	22.541	32.772	49.513	36.444	42.191	25.744	44.058	23.921	10.507	11.175	34.412	10.11	19.512
61.787	15.828	24.963	39.135	31.328	38.453	18.281	33.734	23.421	25.228	22.215	17.103	27.112	19.566
45.086	43.437	55.143	81.316	53.453	54.385	45.593	79.906	42.623	18.51	20.986	32.213	19.808	24.639
46.35	47.401	55.143	112.18	65.569	66.994	45.25	71.141	40.844	40.123	37.829	64.923	36.704	22.979
46.729	35.082	53.117	55.069	57.613	48.599	27.296	60.469	30.241	23.13	18.847	21.069	16.39	21.823
75.005	60.175	81.562	93.945	87.808	86.34	55.445	101.45	52.455	31.208	24.42	31.607	20.88	35.728
43.162	31.454	23.983	40.279	30.05	51.133	26.333	42.604	23.452	30.281	20.195	34.562	26.142	27.898
42.835	19.083	44.128	45.605	26.932	28.336	17.137	35.89	14.594	12.759	10.92	30.705	13.846	13.378
43.136	30.827	37.11	44.04	33.671	42.255	19.152	38.789	20.843	21.94	19.183	25.348	26.214	22.808
40.611	23.997	29.859	47.235	33.076	46.639	29.263	52.072	25.41	17.441	19.245	20.926	17.105	20.85
96.025	34.623	48.02	61.583	57.088	50.524	32.744	63.688	30.252	14.572	20.175	18.954	17.105	20.85
65.873	46.915	27.71	43.001	35.448	41.562	34.961	43.532	39.101	38.946	37.415	50.296	33.932	38.639
22.926	39.621	56.816	60.014	48.881	46.432	43.316	64.873	36.478	28.76	26.327	32.352	23.033	24.272
30.353	34.222	56.816	31.638	32.928	33.325	26.626	39.233	26.554	18.786	15.368	30.251	12.699	14.805
85.47	46.049	45.512	66.868	50.974	55.223	36.977	69.713	43.204	26.529	25.378	32.567	24.347	29.685
38.669	36.124	47.103	55.693	46.48	43.864	26.065	52.48	24.602	27.207	20.771	26.499	22.37	16.138
47.441	47.389	47.103	50.496	60.552	53.328	36.766	58.388	33.219	31.793	24.525	38.358	38.79	36.257
24.763	42.325	29.219	48.087	37.352	43.407	32.692	47.185	32.9	33.027	28.5	36.222	35.724	29.008
25.818	28.447	32.322	48.087	37.352	40.162	28.595	48.972	19.696	12.504	13.372	22.153	17.445	18.524
25.333	28.813	41.572	52.536	61.349	40.162	28.628	50.684	21.842	13.997	13.562	32.081	23.134	18.524
74.519	44.994	68.093	66.645	63.426	53.441	40.235	74.718	35.765	28.357	25.468	37.695	25.715	18.186
41.858	21.208	35.056	40.6	36.471	43.078	21.897	39.781	16.017	25.813	21.441	26.637	29.967	12.872
40.56	31.711	37.399	56.931	49.282	58.372	28.128	54.461	28.09	17.592	12.782	40.434	20.748	16.981
47.458	45.457	37.399	74.761	52.315	58.372	43.714	67.5	47.287	29.629	31.395	50.955	40.848	30.072
78.442	69.299	84.198	105.82	89.886	95.833	51.397	112	48.799	35.705	34.041	45.878	29.608	37.146
34.885	31.877	46.398	61.833	59.459	56.128	28.3	61.826	28.225	17.324	13.327	27.745	16.813	30.868
39.284	29.097	38.605	46.402	44.169	42.087	28.22	47.134	24.195	12.746	13.327	24.707	15.722	14.975
57.742	60.217	57.963	67.464	70.533	68.517	34.556	76.598	36.489	23.224	24.577	43.42	52.08	30.2
54.939	48.025	57.963	56.784	69.039	64.303	30.809	76.598	36.489	20.419	24.036	40.501	25.187	28.466
66.073	45.349	102.93	55.677	59.401	60.771	34.968	86.705	32.912	24.344	20.94	65.144	36.262	28.736
32.711	24.929	34.283	39.13	51.56	42.705	22.127	50.745	20.603	10.74	11.321	25.7	11.663	14.949
24.575	19.195	50.138	34.754	29.891	34.21	16.924	34.29	17.681	7.6269	10.207	16.746	9.5295	12.653
35.029	38.722	66.437	43.658	51.049	46.137	28.251	50.907	31.32	25.091	21.339	30.09	28.025	32.859
43.427	46.314	47.341	69.602	70.115	92.085	37.011	76.019	29.676	32.385	24.163	35.228	35.284	26.151
31.708	35.323	42.778	61.333	46.511	52.261	33.118	50.362	32.08	22.039	17.049	35.228	24.263	23.625
38.698	35.323	41.065	85.353	90.187	93.382	36.986	76.398	42.901	22.039	14.809	44.643	29.887	30.223
30.136	29.021	74.624	44.669	54.014	33.742	24.572	45.301	25.839	20.483	13.643	22.588	20.798	25.705
32.125	36.974	116.15	44.669	37.551	37.524	30.71	47.084	26.513	25.335	19.128	25.913	19.386	25.705
31.465	28.741	59.356	61.46	39.647	42.663	32.005	54.861	28.581	20.823	17.287	19.82	24.181	21.445
22.735	20.585	42.494	36.542	30.706	31.743	17.249	35.752	16.084	14.422	12.018	14.56	19.952	12.61
32.486	29.15	113.97	36.68	30.706	32.45	24.999	35.752	20.923	16.175	24.778	27.931	20.212	23.162
66.419	63.111	87.492	90.799	80.21	83.407	49.517	101.86	44.361	37.138	31.45	40.919	31.11	29.812
25.336	25.828	47.092	54.693	48.665	44.676	24.59	48.634	19.226	12.411	13.618	21.822	17.02	15.221
104.54	74.445	126.95	116.37	112.46	103.67	58.062	122.88	47.759	35.209	32.372	51.565	36.087	30.318
32.342	19.332	58.48	51.983	43.696	34.608	31.807	34.245	23.46	15.152	14.765	27.795	11.668	23.228
39.444	44.428	73.726	67.141	54.289	47.381	29.052	57.642	32.361	26.982	25.391	25.588	23.555	22.91
69.72	73.027	73.726	112.53	76.703	80.359	53.38	108.14	41.562	38.484	40.817	51.659	39.714	35.985
40.113	50.387	76.202	72.084	65.039	65.17	42.334	88.024	41.14	26.474	23.154	36.796	18.652	30.326
32.935	43.105	76.202	58.223	63.652	64.252	42.334	73.479	38.121	38.032	26.961	35.405	23.086	36.081
107.42	72.223	84.022	75.389	58.247	63.409	46.344	82.517	57.273	48.287	37.73	51.563	48.115	51.573
84.148	54.222	61.345	75.389	56.956	63.409	58.134	72.881	44.25	31.955	27.913	57.768	30.712	32.504
26.878	42.761	52.431	43.92	54.691	60.83	32.643	54.791	25.4	31.29	24.271	33.906	30.78	27.1
42.254	63.977	51.364	73.12	101.8	83.485	47.621	91.258	44.566	32.994	29.8	49.85	44.04	48.104
50.224	25.384	36.213	36.499	36.531	44.628	18.222	34.975	14.548	15.51	11.81	19.176	15.64	15.859
65.164	52.732	80.844	91.961	96.496	91.318	44.802	90.254	44.812	27.013	31.181	33.1	23.199	26.381
53.322	52.732	98.584	94.59	71.924	69.786	41.473	90.254	47.105	22.345	30.839	35.401	21.706	31.761
59.51	34.492	55.598	58.985	54.82	54.139	26.752	66.216	27.647	18.637	21.58	23.437	24.295	18.961
59.806	27.517	76.551	43.682	49.44	46.636	21.995	49.416	17.561	17.312	22.091	27.69	18.206	15.688
57.15	30.153	87.251	40.964	51.072	38.927	23.642	47.453	28.353	13.481	18.622	28.665	18.353	16.937
71.737	51.823	101.15	95.131	98.77	97.926	40.496	109.67	47.479	21.495	21.989	28.932	18.361	27.966
54.449	35.175	36.763	93.383	58.172	130.35	38.633	79.45	32.568	22.342	21.723	28.614	28.871	19.89
44.886	27.421	45.507	45.469	40.906	76.873	24.307	46.197	19.625	12.407	16.101	30.653	11.585	16.323
44.886	28.922	63.717	51.864	42.691	56.523	30.659	52.814	22.853	20.293	14.414	31.523	15.657	25.355
62.616	38.137	59.143	78.589	65.758	64.179	38.59	69.353	30.132	20.293	14.703	20.587	17.577	19.644
68.686	28.03	54.994	58.503	59.021	60.418	22.078	41.404	16.016	12.914	14.495	22.949	16.859	27.675
100.34	95.147	83.414	101.13	88.237	104.66	68.648	96.479	60.508	65.235	52.211	58.845	52.296	53.321
74.525	48.243	68.342	61.032	76.648	81.002	31.866	82.933	37.182	23.261	31.964	28.128	44.28	29.877
29.982	38.715	62.033	74.21	62.798	100.94	31.866	74.158	37.182	25.45	23.998	33.642	19.215	17.986
59.507	46.21	62.033	86.531	75.458	100.94	41.415	93.33	42.094	33.396	31.467	40.809	24.862	33.911
65.045	51.865	65.028	70.481	88.718	77.57	39.794	85.729	38.982	34.68	28.531	32.242	30.608	28.53
47.046	37.495	46.537	65.282	48.72	53.976	38.659	65.047	40.419	31.711	16.978	22.493	24.877	22.291
36.414	35.821	48.128	73.498	66.937	71.647	25.979	79.923	24.662	28.837	27.21	29.724	26.955	36.142
49.171	79.323	71.153	112.33	73.095	67.93	63.934	102.2	70.157	49.702	42.332	57.873	36.703	49.847
81.02	82.623	93.447	118.31	104.23	104.08	65.097	133.98	66.135	34.96	42.332	51.321	32.121	38.89
72.562	60.546	64.951	96.73	95.913	90.156	53.479	113.4	47.999	42.357	35.638	53.661	38.827	38.841
48.927	37.522	47.11	50.64	53.604	62.553	33.927	49.085	30.192	25.199	25.487	32.895	29.12	25.841
42.347	52.62	73.961	78.873	89.843	91.296	38.828	70.723	33.847	28.881	34.441	35.297	34.016	23.216
31.896	47.215	42.27	102.36	71.703	69.281	31.986	67.64	30.627	28.269	28.764	31.411	29.435	17.254
82.095	40.174	37.105	51.749	50.933	58.247	26.492	67.64	32.752	15.768	14.728	31.843	25.11	29.278
23.201	21.299	28.148	40.553	30.592	32.939	21.888	37.212	17.753	9.3277	9.9299	31.843	14.201	14.919
20.897	27.208	27.749	48.694	39.63	42.18	20.694	49.183	23.615	16.542	11.807	27.319	15.716	17.027
30.123	27.208	38.704	52.562	43.271	42.18	20.694	52.41	23.615	11.471	11.052	17.47	15.122	17.494
63.971	28.521	56.179	45.689	43.938	53.343	27.935	48.476	20.585	14.22	11.211	25.756	31.971	16.795
37.378	36.463	67.464	53.542	42.596	35.329	33.201	51.76	32.717	13.663	11.483	25.756	35.782	16.904
54.54	37.466	67.464	73.507	46.162	45.798	38.408	65.789	37.022	15.566	13.601	23.991	20.556	19.737
39.38	27.23	46.148	54.737	42.63	41.273	33.752	54.375	31.359	11.328	11.938	15.544	18.55	15.55
33.02	30.216	44.337	65.578	58.898	50.801	26.471	58.017	23.394	12.809	13.829	21.021	16.709	17.421
35.253	39.848	71.964	88.35	71.059	82.118	26.905	75.058	24.239	18.262	20.522	21.121	16.563	15.917
73.15	52.095	78.317	87.771	91.644	89.797	43.735	104.17	32.525	23.125	25.058	33.763	27.273	22.404
103.58	49.316	67.765	92.369	101.43	89.797	47.537	93.685	37.622	17.384	29.56	30.432	34.033	20.436
45.577	36.888	29.24	59.745	30.977	42.213	29.582	49.516	28.917	27.198	22.112	28.702	25.996	25.365
45.577	46.745	46.726	81.664	59.525	67.086	44.936	83.555	39.635	18.882	16.249	38.288	16.211	27.626
32.67	23.881	25.951	67.788	36.056	37.885	17.569	31.035	16.959	10.275	9.9026	31.423	9.8432	18.364
34.375	27.991	34.442	48.397	37.916	44.489	28.234	51.672	24.62	12.939	10.811	19.972	14.929	20.322
45.7	45.708	56.2	75.758	71.665	92.363	42.482	73.453	47.438	25.033	25.561	29.382	20.418	26.997
66.869	53.256	56.716	105.86	93.3	101.75	40.984	93.213	37.905	17.811	21.684	29.768	14.16	21.779
51.131	48.592	47.473	98.514	69.778	88.565	42.661	87.461	36.291	23.573	17.848	42.911	18.605	20.235
42.814	37.537	42.648	64.161	60.836	69.133	30.097	61.845	27.512	18.314	17.086	19.816	19.331	15.778
45.73	24.481	26.643	63.234	41.405	42.662	21.191	55.973	21.945	11.93	11.105	11.553	39.958	9.3802
45.135	66.164	81.853	160.2	92.37	94.536	67.159	121.46	54.392	34.112	29.087	60.846	30.499	33.114
37.764	71.596	120.56	126.48	102.14	100.19	64.778	89.677	50.391	31.216	31.895	52.86	30.499	24.302
41.092	34.362	48.189	66.702	61.139	53.798	37.127	72.493	27.218	17.686	13.891	23.094	23.267	22.945
31.9	32.944	55.474	69.199	64.54	60.353	44.133	57.777	26.337	19.83	12.946	30.543	19.965	22.175
40.39	42.901	50.516	89.468	61.003	68.163	42.968	58.71	33.309	22.85	22.792	35.125	36.464	22.175
68.508	58.902	78.129	117.34	85.437	97.004	58.667	124.79	56.774	30.501	24.83	73.847	27.478	28.093
47.953	49.939	64.299	72.483	60.031	80.953	40.818	72.236	35.426	21.416	23.291	36.786	21.717	34.179
51.473	75.438	102.81	105.77	114.29	122.91	65.477	128.24	62.426	33.702	35.771	51.224	48.51	46.014
88.64	104.28	107.3	129.29	132.69	143.09	96.787	136.83	72.173	46.58	48.188	82.1	27.794	66.295
99.745	73.902	69.717	153.07	115.3	111.82	82.346	109.24	62.152	43.034	38.001	51.326	27.794	25.817
50.199	67.497	56.059	127.68	113.93	120.55	69.57	114.85	69.889	36.249	30.891	64.491	26.406	41.069
57.126	46.382	47.428	80.834	66.977	68.137	34.388	72.905	36.341	18.362	23.088	63.017	23.296	19.084
57.126	66.728	91.969	107.51	92.45	97.292	51.231	107.06	51.74	33.342	37.217	46.475	24.796	43.106
49.05	55.133	73.491	92.457	89.188	93.949	49.577	94.022	38.79	21.765	28.037	32.143	37.996	35.016
77.595	47.4	61.713	63.338	80.861	90.517	45.205	83.676	46.724	21.765	23.827	27.544	30.49	24.81
74.772	48.518	61.713	59.968	67.331	71.765	37.775	64.779	37.68	26.056	25.727	69.494	25.135	42.036
57.512	59.435	74.66	92.072	132.81	83.081	45.099	113.53	35.101	19.566	23.622	61.263	46.295	40.522
93.593	88.218	97.359	131.63	126.18	121.07	73.584	125.96	54.41	47.664	47.034	53.194	51.411	48.107
34.416	59.239	80.733	81.546	89.007	84.83	47.514	86.35	46.135	36.025	31.175	53.194	26.211	35.034
33.875	44.287	48.122	56.605	54.488	67.656	38.44	56.893	31.852	18.708	19.081	56.522	20.556	36.88
29.349	44.287	47.401	88.333	53.048	48.685	37.014	56.893	39.762	24.115	19.309	90.069	32.861	36.88
47.559	42.197	47.401	79.105	72.75	48.685	35.595	60.071	40.818	24.115	19.309	39.903	62.537	36.635
60.636	66.618	74.454	117.82	80.609	83.565	57.079	91.084	47.698	43.397	46.716	48.406	62.537	32.993
39.251	69.558	70.49	104.79	75.777	86.425	51.973	95.054	45.174	39.408	39.232	59.855	49.41	39.855
51.525	48.776	66.303	87.473	75.13	78.135	44.055	96.71	49.492	28.409	23.591	32.033	21.097	27.68
48.209	54.654	82.744	94.745	81.801	95.936	44.177	90.017	44.383	25.57	24.294	36.297	31.181	35.313
40.92	78.645	107.35	109.66	108.08	93.946	62.907	105.1	66.031	32.699	36.384	54.034	38.248	43.972
38.859	61.254	87.954	93.975	94.173	85.804	57.198	102.46	50.529	29.836	26.105	36.447	28.745	35.999
31.445	65.107	72.468	108.85	78.093	78.548	51.163	89.671	67.873	30.155	27.741	67.701	37.636	36.284
62.127	65.56	57.285	106.62	88.395	107.2	58.041	107.43	48.705	28.947	27.655	42.988	21.11	31.24
61.73	45.078	79.399	81.671	89.024	108.88	39.233	85.876	54.512	18.949	21.495	38.807	17.742	29.026
77.159	51.082	75.169	73.14	52.212	69.854	44.386	59.585	46.866	32.031	32.855	58.734	32.075	34.524
60.884	67.379	75.113	106.03	88.563	95.887	58.056	116.97	51.312	28.718	30.969	43.665	38.363	29.877
43.236	55.364	77.099	77.653	86.189	89.119	41.68	107.32	43.161	24.395	30.215	32.191	17.934	24.149
51.953	35.926	57.251	64.841	47.785	54.788	32.002	56.281	33.501	21.444	17.218	59.267	22.515	25.398
48.421	57.118	81.081	89.311	78.554	75.423	65.892	76.343	67.634	32.66	33.157	63.005	48.674	29.084
66.466	71.185	94.833	105.44	91.666	109.2	66.778	83.092	72.713	50.122	45.809	75.838	48.525	45.644
48.586	58.795	101.56	108.69	80.182	84.993	48.582	79.975	51.01	31.462	38	51.736	29.144	29.967
45.271	47.794	66.655	92.891	62.364	72.705	49.952	71.785	43.715	25.422	24.058	51.736	24.162	30.34
53.465	102.02	92.809	161.56	117.27	121.87	92.954	139.68	81.365	62.929	44.783	68.508	41.025	53.35
35.43	61.238	82.399	90.967	76.919	64.112	49.656	74.889	43.919	36.33	31.882	53.228	48.404	39.003
45.787	63.396	87.381	80.679	80.061	83.134	53.663	90.155	48.478	32.584	28.384	76.797	43.94	43.18
30.746	60.769	73.625	87.422	78.309	89.995	50.173	101.32	37.553	34.256	29.969	40.163	45.276	37.415
39.057	45.184	51.887	79.264	65.87	80.264	44.418	79.013	37.504	27.787	23.695	27.164	25.898	29.242
69.484	54.102	69.097	125.59	89.891	104.79	43.575	96.804	34.392	26.56	31.113	32.72	33.672	26.767
35.23	57.488	74.814	117.89	78.75	93.76	54.93	96.804	54.215	26.56	31.113	32.72	24.58	26.767
33.674	57.488	90.585	113.6	80.05	85.637	49.842	102.06	52.795	23.874	28.993	28.994	22.245	21.121
42.07	65.175	60.046	128.28	75.571	88.01	44.257	101.29	43.328	45.992	43.867	40.162	43.658	26.51
44.833	54.606	59.675	86.722	74.904	78.171	50.645	94.381	55.012	29.288	23.825	38.846	22.61	38.655
23.474	16.254	18.076	34.769	26.795	26.041	20.962	36.478	17.744	7.4524	7.2475	11.694	16.092	18.167
31.541	34.084	38.434	39.456	39.43	40.305	37.479	41.312	32.04	21.961	14.969	31.686	29.576	25.478
30.521	46.055	80.618	121.67	70.204	92.33	41.705	75.796	48.7	20.961	19.867	29.764	35.269	29.509
68.231	45.899	73.758	116.58	69.511	70.367	42.22	87.117	51.241	21.461	24.927	26.698	19.948	29.446
32.958	31.607	50.646	74.24	50.415	67.931	31.605	67.769	25.694	19.047	19.147	31.469	19.948	24.132
49.178	79.962	82.342	142.88	117.89	110.94	59.174	111.73	46.821	37.554	30.565	42.002	30.837	27.253
63.084	47.503	61.318	86.543	74.084	70.539	49.268	73.172	46.186	36.509	25.844	55.418	29.705	40.515
37.313	43.446	58.333	95.391	74.084	84.268	40.426	73.172	48.053	21.703	24.577	33.862	31.526	18.269
59.081	55.218	61.925	73.133	61.012	63.004	41.408	82.706	56.456	27.84	22.512	52.338	30.621	36.062
48.914	55.218	64.549	79.645	68.035	87.999	41.685	65.262	46.298	23.407	25.855	33.367	54.567	35.817
35.544	28.876	37.705	62.017	34.774	45.247	32.136	42.77	33.835	14.766	13.745	25.902	20.808	27.587
37.482	59.536	68.348	100.72	94.378	91.786	44.131	86.903	39.051	33.181	36.706	53.599	39.23	44.242
61.728	87.132	120.38	115.04	123.22	110.93	67.059	126.77	48.017	34.878	37.42	40.453	28.004	33.84
25.133	36.93	59.345	43.08	39.151	57.061	30.869	50.452	33.395	18.041	20.282	32.295	32.818	33.52
33.229	36.93	59.345	63.047	37.907	53.624	31.219	51.756	47.71	19.453	20.282	37.532	27.054	33.52
41.261	45.772	51.007	64.321	45.767	41.279	39.873	48.685	47.71	32.348	36.996	55.324	31.775	18.207
60.508	49.812	51.007	82.571	49.532	59.445	45.624	51.559	38.171	25.674	17.08	36.716	26.182	36.722
30.482	38.274	44.389	64.521	61.392	69.676	27.794	58.257	42.315	26.119	21.216	53.581	26.695	21.056
54.181	38.126	84.271	61.917	50.475	61.396	31.96	58.257	42.315	19.815	15.216	27.946	43.845	18.911
139.97	67.101	65.863	96.492	73.492	70.395	49.74	86.755	51.266	23.466	30.082	40.23	34.995	41.81
80.505	36.818	28.606	81.038	51.131	60.377	32.837	59.736	34.252	18.383	17.373	29.91	20.644	38.978
86.753	40.117	34.118	84.007	59.188	62.732	38.328	71.748	38.147	23.961	15.744	28	15.761	18.861
84.376	45.626	55.392	79.668	65.297	79.445	35.595	89.826	38.147	21.349	21.117	28.797	27.175	32.856
44.322	43.802	65.044	76.428	69.706	75.777	42.668	86.741	33.322	18.009	14.502	29.316	14.257	24.227
35.798	49.665	60.496	85.785	74.208	93.411	33.043	76.372	36.083	22.091	20.954	34.63	29.914	24.773
39.616	43.254	84.065	88.723	80.799	75.115	43.265	83.804	38.444	18.821	16.937	22.194	11.974	12.834
29.36	21.816	32.15	42.572	29.335	41.157	27.626	32.391	19.032	6.8706	9.6018	18.702	57.512	11.71
24.918	15.331	21.49	30.774	24.16	24.531	17.959	30.241	15.444	6.6123	6.9382	12.858	4.9619	8.1916
11.771	5.8173	12.035	27.202	12.3	14.584	9.448	16.058	8.9002	4.5398	3.5309	5.1798	2.8726	6.8594
28.023	19.961	16.79	34.599	22.635	26.995	38.479	31.32	24.215	13.299	8.6754	22.507	12.591	13.947
29.986	14.893	50.207	34.245	36.909	29.277	17.66	26.07	16.297	11.047	5.6864	9.6254	7.1568	9.1712
22.733	40.029	51.46	104.76	58.06	60.642	42.32	62.483	35.929	16.334	13.763	23.463	15.21	22.873
26.076	40.029	43.443	89.474	61.933	62.715	44.495	76.399	44.505	19.802	16.527	27.314	15.21	28.926
27.473	64.226	63.466	95.777	85.132	93.546	61.937	96.078	48.808	25.366	18.998	50.252	20.374	38.662
40.981	45.974	59.459	95.777	76.4	68.203	37.944	76.685	41.491	20.646	19.413	38.088	16.954	29.251
73.519	57.772	98.539	103.9	89.931	80.515	43.235	96.507	43.286	29.058	30.668	34.855	18.507	34.923
41.111	45.979	69.925	130.41	80.976	75.918	53.838	82.251	55.095	26.598	24.603	42.164	23.529	27.548
34.031	54.453	71.039	100.17	75.009	80.384	46.128	101.16	38.685	25.392	23.969	26.086	26.541	25.752
24.269	61.889	110.56	134.21	100.71	117.63	70.824	130.52	44.492	28.71	24.217	32.615	28.344	26.959
39.163	50.654	51.833	136	98.225	91.391	51.068	97.794	31.712	22.291	28.303	27.82	16.735	29.559
26.854	35.198	49.293	115.03	58.279	56.727	33.629	65.762	23.158	12.371	15.522	25.741	17.084	38.665
26.687	42.212	73.392	78.439	66.904	72.928	27.638	79.894	24.972	18.04	18.548	18.332	20.388	12.937
46.802	40.429	66.932	68.098	66.515	79.88	33.595	75.589	32.704	14.474	17.749	20.647	15.087	24.478
36.129	46.495	67.748	95.739	67.095	74.576	47.057	85.619	36.481	20.127	18.743	36.865	15.813	26.919
39.002	47.226	47.857	60.791	67.095	73.645	39.018	85.619	30.278	28.126	21.317	52.768	17.595	27.053
39.611	82.206	125.45	146.7	136.75	145.69	79.383	153.51	60.357	35.274	34.446	81.799	28.395	36.886
36.064	124.6	133.94	200.74	172.27	188.7	126.2	230.41	109.22	52.141	48.241	88.76	34.452	62.976
36.836	70.292	102.72	155.3	133.84	130.24	52.589	138.17	39.552	30.177	36.272	32.546	27.612	23.649
36.836	70.767	80.793	143.84	122.23	139.93	71.721	138.17	43.28	33.194	35.916	40.122	24.23	23.701
32.291	60.722	68.715	106.75	104.64	91.629	52.043	113.36	43.428	30.666	28.838	42.193	30.093	35.131
52.659	101.2	114.47	151.57	124.9	133.84	81.962	171.08	89.795	40.923	39.262	70.736	32.202	58.338
38.327	37.259	51.056	94.331	76.808	74.912	32.886	68.351	31.073	18.08	22.986	20.738	20.314	18.08
39.979	37.259	42.118	57.291	61.095	49.881	32.886	66.02	38.42	12.79	16.516	19.416	12.7	20.142
35.837	18.275	30.73	51.942	30.747	28.807	15.703	32.395	16.162	12.331	10.046	13.961	8.5467	14.487
67.942	26.662	37.03	77.878	61.074	64.973	26.482	37.991	26.043	15.896	11.045	23.245	46.786	22.291
80.226	29.343	54.654	63.501	42.668	46.844	27.37	38.343	24.64	16.214	14.793	20.416	16.814	21.747
80.226	74.639	95.693	87.44	109.01	96.608	69.883	121.18	61.677	26.192	28.761	44.183	31.961	45.007
54.476	66.294	95.693	110.16	108.61	96.608	59.066	121.18	53.803	26.192	32.496	28.277	24.125	45.007
51.533	292.93	272.22	518.64	393.59	428.36	302.47	541.3	282.39	109.87	96.27	168.47	81.793	141.92
37.152	61.327	68.887	103.45	94.224	100.3	64.419	103.84	59.7	25.631	23.981	40.574	26.953	32.628
43.494	37.698	94.234	57.525	76.775	97.805	39.57	73.523	29.12	13.895	15.945	21.945	11.581	13.383
40.214	34.556	46.642	43.43	79.615	72.483	33.383	70.892	31.005	12.77	20.27	18.955	22.496	17.766
26.047	46.633	53.899	77.894	51.128	52.428	39.453	59.878	44.119	22.121	24.065	36.754	22.604	25.675
88.72	46.633	63.442	86.128	56.724	64.465	50.398	96.728	58.154	22.121	19.795	50.968	23.33	32.502
37.397	54.35	44.275	70.147	77.261	68.326	63.434	55.55	48.33	29.844	24.501	70.425	46.016	36.842
36.73	44.586	37.624	69.024	47.426	54.76	31.17	46.903	44.472	21.877	19.804	39.76	27.639	25.482
57.719	39.368	49.811	74.17	61.014	57.046	36.692	77.171	39.94	15.224	14.917	26.988	11.247	27.288
64.641	31.569	71.711	48.358	46.01	48.034	35.632	58.506	30.425	13.043	15.545	28.523	17.145	24.746
48.004	49.141	100.48	88.056	65.515	63.993	43.84	62.584	42.927	23.333	19.861	37.756	48.175	24.746
43.371	74.387	56.025	107.29	87.829	97.514	57.251	88.284	49.338	28.764	26.796	52.018	48.175	32.931
36.49	44.637	62.745	107.29	67.072	74.555	42.834	81.295	38.902	16.763	21.474	28.697	17.254	32.288
93.494	78.472	80.167	138.15	111.81	91.772	62.358	114.08	67.698	33.816	33.194	44.195	30	52.191
82.258	52.386	61.977	119.36	80.902	91.772	51.362	108.79	53.543	22.271	21.703	33.813	15.751	48.375
40.432	52.595	59.011	96.913	80.902	101.86	52.712	109.16	41.601	22.271	19.909	47.726	21.728	41.224
41.794	124.73	110.67	216.93	151.58	163.87	120.48	231.34	101.13	53.069	41.316	66.672	41.767	61.399
45.042	74.761	93.451	116.14	169.42	153.11	80.642	116.76	70.202	31.695	29.569	40.887	24.295	36.12
35.427	52.316	79.19	95.704	101.22	100.45	44.392	115.22	39.629	18.98	23.188	26.638	12.393	21.16
30.367	57.233	73.261	95.071	86.561	87.289	45.001	102.6	34.441	22.968	25.279	35.795	17.185	24.493
39.431	56.549	73.261	96.539	96.029	95.082	50.904	99.891	40.478	22.204	23.817	35.865	20.414	31.191
22.94	52.921	56.899	80.18	80.145	75.347	50.24	78.151	36.681	17.756	23.409	26.332	16.966	22.896
58.98	48.251	65.675	90.682	66.827	80.684	34.111	66.015	39.554	21.159	22.06	36.415	20.966	24.47
114.44	54.56	64.191	101.08	82.17	84.821	52.433	101.88	47.587	18.512	24.435	30.685	25.351	35.646
33.485	35.217	50.686	68.818	51.391	64.268	29.212	53.842	35.409	13.003	14.337	53.34	19.026	21.21
21.204	34.76	56.08	78.303	66.908	67.301	32.826	68.704	19.36	16.915	16.672	22.035	11.818	17.852
21.204	48.443	56.715	106.02	80.087	88.496	49.104	89.616	50.962	18.82	19.298	41.14	15.303	29.334
22.319	28.838	36.258	81.432	55.99	88.542	31.551	54.899	30.032	23.286	20.822	17.017	12.347	16.58
22.319	24.789	45.004	48.549	44.43	57.08	21.244	43.868	20.059	12.805	11.384	24.684	9.6589	14.327
46.651	36.62	43.297	44.086	50.048	55.929	35.032	50.558	32.047	14.484	14.266	24.656	15.143	33.617
26.071	32.917	47.119	45.811	42.418	52.135	26.84	50.558	23.472	20.153	16.585	20.978	25.555	28.476
34.773	39.266	53.516	86.894	53.975	72.934	30.582	63.587	38.115	20.28	16.585	20.978	24.588	18.978
34.773	33.718	50.466	85.111	53.483	62.021	23.506	68.942	21.888	14.164	15.289	19.849	16.047	17.194
48.175	39.625	46.026	84.496	68.319	70.981	33.128	77.782	30.677	15.416	15.289	20.355	13.005	26.476
26.209	39.625	80.214	84.496	76.085	75.836	37.435	79.691	36.664	15.416	19.867	22.737	14.87	18.613
35.032	29.891	38.461	48.922	51.014	46.312	27.282	53.574	21.818	10.625	13.43	20.761	27.048	25.177
36.362	29.891	36.878	37.19	45.505	42.01	23.431	45.408	21.818	13.336	17.634	23.197	18.918	25.682
43.431	43	59.589	91.081	67.196	65.614	30.015	75.039	30.12	22.69	20.102	27.113	21.643	28.076
42.577	36.535	59.589	67.348	58.599	65.614	32.422	55.802	28.149	16.004	13.506	20.135	11.427	20.341
31.552	32.939	64.317	73.084	53.174	63.036	39.834	55.802	25.662	14.058	13.425	26.554	15.228	19.04
32.993	44.047	53.7	69.587	53.01	78.078	48.94	73.379	40.814	16.823	16.518	33.793	48.705	26.116
32.993	39.841	37.077	69.587	51.17	42.634	33.184	46.494	36.187	13.084	16.444	29.966	16.024	19.835
40.656	37.307	45.755	62.543	64.692	66.227	31.994	74.192	33.153	19.968	18.722	32.624	14.276	24.126
36.569	38.823	45.755	87.962	64.692	58.265	33.37	74.192	33.471	23.792	19.856	21.839	18.775	17.325
32.424	50.509	72.328	97.892	83.97	93.711	44.512	90.652	39.917	23.386	18.28	32.613	24.479	32.845
33.712	41.046	38.424	57.507	66.425	67.7	32.831	68.737	31.745	24.974	24.207	29.115	21.297	15.486
43.402	39.757	36.854	82.869	54.542	56.478	34.396	71.682	34.893	22.689	18.44	29.864	21.878	32.21
53.306	56.327	36.281	99.421	66.175	81.425	51.065	86.551	46.193	27.798	27.02	48.348	29.445	33.298
31.649	38.896	40.098	60.169	53.767	65.962	34.907	64.695	30.997	23.319	18.064	26.189	26.486	24.759
50.799	53.601	46.209	85.634	71.542	93.516	44.365	88.644	41.11	38.41	26.82	66.218	47.7	56.749
51.856	47.017	33.802	95.099	61.765	94.407	42.526	63.421	34.661	24.186	19.818	39.361	34.72	23.026
54.633	44.83	54.546	94.482	61.244	73.624	41.269	85.916	40.478	21.581	24.332	29.809	20.577	22.102
68.687	41.798	35.36	68.883	61.789	73.624	35.663	64.795	40.478	27.844	24.297	35.072	32.483	32.322
78.288	59.196	47.396	92.062	88.411	90.797	60.721	84.676	61.818	43.55	38.069	57.084	53.123	37.338
70.609	50.568	43.996	75.797	65.489	70.383	43.294	78.693	43.306	25.465	26.345	39.536	20.821	27.088
49.526	47.341	52.205	73.262	59.683	65.364	41.248	72.26	37.128	25.465	24.787	39.536	24.265	21.366
49.383	25.013	29.092	66.798	42.81	68.186	23.45	42.731	21.657	17.677	19.377	35.655	24.087	25.459
43.007	55.435	55.425	59.476	81.605	136.44	48.771	77.105	37.923	24.465	23.947	71.282	20.031	27.098
43.644	53.946	68.478	110.16	114.54	130.26	47.498	90.751	37.919	23.553	25.945	27.345	19.634	28.586
28.002	35.808	58.211	54.582	44.219	51.799	38.377	60.459	33.001	16.47	19.062	25.616	23.777	20.833
35.966	61.684	66.73	120.94	86.611	71.177	52.269	80.284	47.413	23.342	25.487	41.226	20.54	44.251
59.429	62.801	88.469	101.09	86.942	89.07	56.238	110.07	49.605	24.965	25.996	49.339	28.356	37.582
41.917	68.177	89.238	115.97	119.43	111.11	57.739	125.64	57.432	29.435	26.126	54.395	18.622	35.378
39.013	61.622	65.036	88.603	70.62	64.444	55.824	90.864	62.311	27.966	25.608	32.547	28.149	28.864
67.408	61.622	73.821	94.72	88.236	94.066	63.268	102.71	56.522	34.307	28.771	45.731	34.472	28.864
58.702	113.42	133.22	192.02	146.49	162.5	99.073	179.3	104.32	53.379	49.233	71.525	38.744	52.254
38.5	50.829	59.615	88.651	81.005	75.049	40.768	77.681	36.09	26.218	23.185	27.317	18.796	24.388
55.111	47.119	57.844	98.508	87.054	74.258	56.354	85.38	49.18	25.444	21.73	35.166	21.224	28.666
73.429	78.891	108.03	130.25	100.61	100.73	61.909	122.25	64.517	38.34	32.759	51.669	61.774	47.838
52.669	67.463	69.569	124.19	99.841	91.594	60.46	115.7	64.517	34.481	28.09	50.864	38.473	36.32
44.755	79.418	82.523	128.12	119.69	115.7	60.993	134.3	61.134	35.005	35.322	53.822	35.387	42.312
39.528	51.911	67.929	95.323	83.669	85.122	46.591	97.042	50.993	24.304	27.721	30.579	19.814	24.591
64.357	67.125	82.256	114.04	106.32	113.52	55.553	125.94	42.693	26.626	31.359	40.673	35.724	32.884
30.358	41.091	57.76	85.527	72.683	103.43	36.554	75.513	32.346	18.83	21.959	21.174	36.167	18.587
44.113	48.624	71.736	90.876	77.545	100.59	52.947	87.329	34.403	19.977	21.959	22.625	17.489	23.925
36.714	45.092	80.919	72.919	72.238	73.025	43.223	86.446	33.871	20.193	21.317	36.318	19.691	22.237
29.597	71.279	82.351	132	105.95	104.54	55.732	126.27	56.435	25.264	31.708	36.318	44.136	42.949
22.619	44.124	56.282	61.882	78.871	73.147	38.855	75.853	38.12	18.514	24.605	25.742	13.03	34.837
36.577	34.362	56.759	55.07	67.384	62.207	39.336	76.543	27.907	13.039	20.294	31.483	15.116	29.688
32.286	79.454	81.496	150.22	122.14	126.96	59.587	126.07	54.002	38.703	40.012	48.376	42.781	40.927
32.428	61.836	62.291	116.14	85.092	87.821	50.653	89.1	43.539	37.007	28.744	35.422	28.562	32.808
35.501	69.869	91.193	135.41	139.62	138.42	52.207	117.24	38.924	25.677	27.968	31.605	25.996	30.724
32.466	56.785	68.077	106.32	97.153	104.54	44.478	112.37	33.48	24.833	26.086	29.65	21.694	32.736
25.121	70.64	73.509	142.94	113.27	114.38	63.262	136.37	59.341	34	34.493	38.443	24.542	35.483
90.71	49.779	76.931	92.717	79.309	83.654	37.624	86.327	49.922	23.418	25.94	37.779	24.542	29.305
38.291	73.385	74.993	87.591	115.65	134.77	54.209	112.24	47.781	29.172	33.604	36.037	28.523	20.581
51.284	73.385	76.549	90.948	112.19	107.17	54.209	108.57	63.957	40.229	34.618	75.349	47.937	71.939
61.048	68.907	76.549	90.447	77.026	87.981	51.165	84.375	50.611	40.229	33.985	56.887	50.617	41.965
52.301	55.654	57.051	83.057	75.109	71.814	51.156	84.375	46.888	31.97	22.957	54.575	31.413	46.162
64.474	52.479	67.699	88.863	77.504	107.16	49.294	97.019	47.062	29.787	25.518	42.787	31.127	51.934
107.67	89.124	96.204	129.21	95.112	110.17	80.61	116.82	66.801	51.249	53.488	87.292	49.172	45.21
75.007	89.124	87.068	107.16	112.79	155.02	72.731	96.894	58.244	51.249	58.271	51.931	53.73	41.636
48.407	61.605	83.083	81.9	74.744	73.361	55.24	76.641	52.596	40.842	35.191	51.931	33.546	33.536
111.84	92.279	80.287	147.07	83.212	83.131	79.679	106.41	89.909	65.584	42.979	70.093	94.834	50.92
44.406	68.97	89.3	114.99	115.76	137.65	56.704	132.07	50.937	25.838	31.606	39.637	26.856	25.314
35.271	40.54	55.039	60.096	62.39	66.826	31.638	70.335	40.913	17.438	22.442	41.026	19.112	32.704
86.866	50.326	64.945	83.307	55.165	66.826	55.103	73.3	65.623	27.001	24.664	32.944	23.167	39.707
98.772	98.155	72.963	158.95	105.73	134.73	112.75	128.02	139.78	57.1	49.607	90.542	52.429	65.767
73.966	71.76	72.963	110.33	92.113	97.863	68.77	101.24	77.293	47.335	36.555	68.979	39.057	45.025
39.201	55.749	53.428	102.18	67.113	65.881	52.615	82.914	40.688	30.84	27.494	36.75	31.175	34.206
75.934	63.071	62.763	104.85	87.484	89.893	53.759	110.72	50.115	30.84	30.751	44.007	39.401	34.8
50.48	60.95	79.71	98.781	73.419	77.524	53.986	99.781	45.618	24.032	28.814	39.118	34.579	24.349
50.48	70.569	103.84	132.9	119.5	129.96	74.623	150.81	60.792	25.157	28.206	39.118	28.875	27.783
49.178	79.732	86.703	133.52	129.82	159.06	60.082	131.13	53.619	40.724	37.561	53.776	27.6	33.52
27.627	70.667	82.372	97.025	105.65	100.44	56.209	130.4	45.893	30.565	28.122	53.089	25.074	29.747
36.164	50.085	82.372	93.532	76.843	77.988	38.566	88.343	37.634	19.388	22.608	48.743	26.032	20.611
39.963	34.636	34.573	92.025	38.998	48.342	36.023	60.928	28.749	18.872	15.327	44.238	31.54	17.643
73.257	69.261	100.57	106	93.287	99.856	61.156	122.88	65.249	33.446	30.489	56.19	31.311	53.135
63.208	90.751	111.95	143.5	138.77	125.23	76.066	124.01	67.934	43.899	41.666	57.484	31.067	48.341
51.651	69.88	92.179	152.52	112.29	125.17	64.905	125.67	54.607	30.872	32.39	46.33	24.799	35.883
65.546	47.026	65.92	100.75	84.682	77.417	52.146	88.667	50.018	19.66	21.615	36.511	16.327	30.893
42.255	45.272	64.758	86.951	86.279	84.669	39.848	93.512	31.34	18.186	23.562	23.541	23.52	22.758
44.268	45.272	62.624	94.969	74.45	78.52	39.848	85.079	34.074	21.555	23.024	24.59	18.326	21.183
44.726	68.829	74.109	105.42	85.481	78.52	52.5	85.501	49.796	47.636	46.375	45.677	44.109	42.835
44.063	51.464	72.121	65.069	77.831	68.108	36.095	75.291	31.634	27.554	27.585	40.022	27.051	28.324
47.92	48.005	59.202	102.61	85.756	99.2	37.439	86.457	29.903	21.816	27.585	31.485	28.891	22.643
52.331	70.542	93.356	131.99	99.679	111.99	64.83	110	66.926	35.709	30.508	48.741	28.432	37.152
66.368	97.289	98.096	194.72	134.68	143.75	89.771	165.68	76.254	37.68	43.442	51.259	42.946	41.963
67.197	38.659	67.448	149.17	67.478	71.199	57.456	73.054	37.487	14.782	17.08	23.273	25.401	23.588
70.48	68.815	53.586	149.17	97.678	100.96	54.668	102.9	52.937	28.979	33.025	39.258	35.543	31.479
70.48	52.79	48.843	86.352	68.399	73.855	47.846	87.156	38.647	36.634	31.095	40.802	32.028	32.624
47.129	59.627	78.497	124.12	105.65	112.48	54.33	87.156	44.812	28.296	34.622	44.54	40.181	25.068
29.452	36.744	45.458	73.917	65.368	56.634	32.738	64.771	36.274	19.777	19.142	29.735	15.711	15.781
34.042	22.346	25.555	44.357	34.04	40.655	23.799	38.957	22.177	14.745	14.55	15.933	12.554	13.537
48.797	37.115	27.218	53.451	39.1	52.163	31.906	50.472	30.329	21.197	25.941	20.273	30.951	22.963
57.052	37.115	27.218	69.289	47.185	53.476	37.218	58.74	30.329	21.197	17.344	23.34	16.789	21.962
51.177	45.202	61.78	72.326	62.209	73.243	48.665	66.291	40.571	21.752	17.102	33.41	21.503	23.183
37.239	42.354	52.809	83.962	54.652	71.32	44.357	76.267	40.879	14.835	17.102	27.517	18.331	19.474
68.551	42.987	52.809	83.986	55.262	71.32	44.357	76.267	38.397	23.483	20.764	28.187	21.548	19.135
56.262	42.987	52.399	86.905	55.262	58.466	41.475	72.947	46.208	25.411	17.476	27.712	23.016	20.024
29.537	27.861	25.075	73.31	35.65	40.132	39.03	42.772	39.137	23.087	22.07	17.356	17.555	15.221
83.616	69.309	64.088	94.211	85.337	83.877	76.224	108.47	70.892	28.012	23.197	49.83	21.543	64.065
35.392	33.906	40.783	57.003	50.252	63.492	35.702	59.976	32.302	17.07	13.655	26.658	15.237	20.319
43.307	47.393	62.521	72.707	87.435	105.92	43.515	84.501	32.302	19.552	28.589	24.918	18.856	25.692
45.51	37.624	48.443	71.812	54.461	57.015	35.897	62.783	30.185	17.433	13.175	24.918	12.748	23.115
28.019	36.19	47.41	52.017	42.622	50.577	35.288	49.74	32.013	20.836	17.656	34.355	15.856	29.089
29.764	38.676	51.319	84.681	61.65	64.211	38.847	74.695	33.883	19.501	19.466	17.837	16.937	15.52
32.71	53.391	71.24	110.1	101.02	108.43	48.201	103.23	36.322	17.39	23.526	26.459	16.937	22.065
50.072	43.132	84.731	83.305	87.87	68.219	36.672	75.897	34.34	17.44	19.679	30.64	13.37	24.069
72.487	68.331	124.27	140.27	119.98	110.65	69.288	127.81	61.681	27.282	32.703	41.745	69.455	42.706
28.495	34.699	38.128	55.002	46.153	43.57	31.238	48.192	28.964	25.21	21.857	24.529	35.88	19.1
28.495	23.847	28.669	46.341	37.87	36.76	26.108	40.766	21.165	11.438	11.969	18.067	14.951	16.066
35.02	32.233	30.804	55.449	61.03	56.052	32.604	55.451	25.395	18.475	11.971	22.872	14.3	18.465
22.131	26.398	32.157	32.836	51.604	40.892	21.342	41.787	20.492	13.04	16.812	19.722	18.743	15.363
31.188	31.544	36.576	69.4	57.805	48.024	23.24	51.132	20.932	20.629	24.049	22.55	20.757	17.109
33.981	33.64	36.45	68.644	48.162	45.549	23.915	51.132	20.932	28.702	27.746	22.55	34.847	17.109
33.981	59.704	57.894	97	82.2	85.812	51.571	100.27	34.423	25.997	36.781	39.198	23.761	34.258
39.999	55.103	61.74	85.583	74.849	77.854	38.497	81.739	31.857	24.883	23.288	58.044	22.096	35.787
46.377	42.827	60.607	76.959	63.932	61.383	34.579	71.386	31.39	27.915	22.278	26.854	22.795	21.123
32.38	35.143	52.162	61.329	49.453	52.564	27.554	58.509	23.978	18.531	15.014	26.854	22.004	18.907
31.324	35.143	45.943	65.107	51.749	60.868	27.589	60.443	28.75	15.876	14.146	20.367	22.004	17.576
39.909	43.241	45.943	72.341	53.933	64.571	37.748	74.989	31.765	23.43	21.201	20.367	21.98	18.064
30.713	37.705	39.16	81.445	54.905	57.227	36.722	69.193	30.582	18.602	16.462	26.215	19.986	22.153
27.071	35.3	48.881	80.21	58.882	53.59	36.722	67.927	30.582	16.631	16.285	26.215	23.08	20.161
15.108	23.351	26.151	48.28	43.654	43.943	23.015	49.38	21.072	9.6562	11.295	14.048	12.382	14.108
45.538	24.602	37.442	48.28	41.865	44.257	27.669	59.01	25.668	12.729	9.459	21.733	12.86	17.415
32.721	26.148	37.855	62.883	42.011	49.768	27.149	59.308	22.404	12.114	10.689	25.022	15.827	17.619
42.115	28.941	31.975	71.873	37.625	42.209	30.404	54.164	32.402	16.539	14.912	21.914	17.834	21.795
42.115	20.968	27.093	43.997	29.31	25.489	26.038	35.249	20.556	14.16	12.138	13.823	13.479	12.196
45.128	27.95	41.89	59.361	46.401	47.419	28.406	52.8	28.723	14.154	15.498	16.303	14.109	22.337
60.331	53.499	44.027	83.624	63.802	73.974	45.874	87.073	45.214	21.852	24.178	28.323	20.366	39.638
60.534	47.506	46.187	77.339	54.733	53.565	35.257	62.525	38.519	30.69	25.179	28.656	23.797	28.407
31.889	31.356	46.56	76.124	72.073	53.773	34.834	67.499	29.223	16.09	14.799	17.027	14.056	19.53
40.856	46.569	48.605	100.91	103.26	96.436	51.121	95.028	40.681	16.681	20.719	28.639	15.764	29.55
34.208	28.401	45.564	57.896	48.953	58.462	28.672	55.313	22.996	13.463	14.592	16.117	13.837	17.288
34.208	29	39.871	69.249	40.414	48.312	28.834	55.313	25.867	17.245	15.158	20.943	18.934	19.243
51.781	77.645	65.684	150.73	100.04	99.269	39.792	79.455	46.046	42.88	40.075	71.377	46.837	43.601
32.283	42.855	44.767	70.744	62.918	63.466	39.792	49.121	38.386	19.801	25.663	44.106	26.179	20.548
54.437	84.607	127.38	122.26	121.95	150.74	60.652	135.67	59.938	39.66	33.268	48.675	31.105	61.878
90.804	64.172	74.049	115.31	88.514	87.163	65.083	101.33	58.993	31.504	26.223	39.483	20.551	46.555
92.994	66.983	90.785	115.28	100.97	107.74	48.619	117.82	46.619	24.4	22.996	36.823	27.059	37.199
63.505	41.183	52.742	82.527	62.134	65.356	42.622	52.537	30.732	30.199	24.952	33.914	34.135	19.463
62.018	49.883	62.582	105.51	78.355	78.935	51.273	89.582	44.675	20.755	19.516	34.158	18.618	32.105
82.719	69.159	76.942	117.49	100.29	124.08	66.669	120.59	53.544	34.858	25.84	48.993	27.426	50.814
77.55	67.182	95.158	101.91	113.56	143.67	59.264	130.3	52.497	29.596	35.106	37.204	25.315	34.768
71.724	63.832	90.386	111.75	113.4	111.99	51.984	112.99	45.885	27.112	35.106	32.706	23.111	32.531
24.058	20.769	23.075	62.732	29.416	41.271	18.052	49.946	21.368	13.783	12.905	14.37	16.066	21.056
27.294	20.002	20.569	56.301	30.751	41.607	20.792	52.068	17.298	10.553	9.0339	15.826	8.0734	17.176
36.372	36.215	40.432	61.549	50.145	68.793	41.813	64.179	32.958	13.117	13.542	16.497	13.706	19.256
52.07	36.215	53.054	49.314	74.194	77.736	43.434	68.612	38.286	17.167	13.108	24.292	13.706	27.613
56.324	47.273	46.586	95.74	73.984	64.553	51.823	95.458	50.333	25.584	21.813	31.169	20.357	24.381
43.156	28.063	26.568	46.309	34.65	45.503	32.054	47.097	26.583	18.143	16.641	21.72	13.606	18.079
29.9	24.05	25.52	51.677	29.33	49.535	31.002	32.198	22.519	12.683	13.87	20.498	19.859	15.413
48.947	46.211	44.455	83.112	52.705	58.61	47.187	84.568	42.218	22.256	14.512	36.535	21.934	24.634
43.5	41.54	44.455	91.295	47.973	58.61	37.907	66.948	35.501	15.797	14.512	31.913	14.077	30.652
30.41	30.265	46.332	64.561	58.457	50.937	30.097	55.577	21.312	15.633	19.416	14.012	14.378	18.805
37.935	36.906	43.41	66.459	46.446	45.761	42.017	63.037	39.096	19.999	21.065	22.726	16.175	19.554
48.795	47.283	43.748	86.512	55.803	59.408	44.489	70.786	40.963	24.475	24.391	30.724	19.048	35.187
26.189	30.27	41.798	53.248	45.105	40.048	24.996	44.805	24.907	24.5	20.44	24.935	21.802	26.558
30.168	34.549	40.357	57.911	46.021	48.369	29.708	54.101	24.907	23.907	25.509	19.544	23.719	25.053
56.737	48.609	71.514	79.451	92.158	90.359	43.323	71.878	35.021	23.907	23.459	42.712	18.456	32.828
26.695	37.081	67.87	48.205	56.958	51.301	27.805	54.259	32.133	25.168	25.317	27.734	27.422	14.46
28.846	41.87	57.377	70.819	74.556	72.421	36.335	75.078	29.927	23.05	25.317	25.192	21.78	22.497
57.533	46.429	80.46	79.894	83.243	80.1	36.335	78.851	36.419	18.427	19.675	41.036	14.849	27.552
40.783	48.597	69.607	107.69	88.363	87.723	45.178	102.8	43.985	23.448	20.397	28.59	17.926	32.524
80.675	60.462	75.25	144.45	96.304	115.04	69.666	125.82	66.425	26.097	25.858	30.006	21.7	36.401
76.972	70.117	110.09	139.66	108.34	120.15	69.666	136.95	66.425	35.533	39.265	33.415	45.541	42.763
85.102	57.752	66.55	95.339	76.004	77.348	67.159	104.84	63.239	40.953	35.654	41.141	49.994	60.793
101.23	54.207	61.841	83.526	76.004	77.348	53.849	72.419	54.117	24.735	24.143	41.141	45.518	49.055
46.137	21.536	42.52	57.774	30.506	46.821	35.454	39.383	37.864	31.647	30.516	14.654	27.512	38.929
37.034	20.407	32.941	68.236	30.943	35.458	24.973	39.41	22.488	10.316	8.1281	12.339	7.1248	10.699
75.497	70.11	61.983	111.38	78.951	88.155	85.556	103.97	89.086	45.316	24.336	48.172	66.302	67.054
84.367	61.361	48.858	67.316	44.641	48.552	64.879	60.395	62.264	45.719	30.389	62.643	37.273	100.46
34.596	45.212	39.656	63.92	53.921	60.064	29.803	67.043	29.349	18.075	20.436	19.804	17.646	23.676
44.386	66.976	85.014	117.9	115.65	107.18	54.11	129.7	45.191	31.934	31.77	29.769	26.453	24.858
53.206	72.681	86.278	123.05	108.73	117.39	63.777	135.52	54.906	32.022	25.651	39.449	48.975	34.338
51.81	53.314	66.002	84.689	89.03	89.759	49.458	99.237	38.75	30.363	29.436	30.166	36.52	25.15
28.233	34.722	53.394	65.768	58.571	57.482	29.034	65.672	22.292	18.773	18.358	17.013	29.021	16.531
33.972	25.861	32.377	38.316	43.442	49.146	20.213	44.718	23.274	13.604	14.087	19.786	19.247	17.513
34.77	43.343	52.464	65.71	67.128	69.481	34.477	77.71	31.185	23.154	22.699	24.455	19.336	25.204
39.188	67.399	65.529	124.7	84.726	83.947	62.309	106.67	54.159	30.242	27.667	32.639	20.742	29.281
63.024	70.59	76.351	143.55	104.35	118.86	71.546	135.06	64.315	29.928	27.667	41.719	26.881	39.1
45.776	39.504	56.19	72.838	61.614	63.712	32.614	76.241	36.242	18.246	20.081	23.647	21.694	25.764
39.037	38.808	51.741	58.022	59.648	63.712	33.931	74.699	32.212	19.389	17.753	18.496	25.023	22.739
28.868	38.116	54.846	86.038	62.396	65.872	35.276	67.932	34.875	18.739	18.127	32.149	20.739	19.01
40.445	39.273	54.966	89.388	75.379	65.872	36.31	76.897	32.149	15.024	18.044	32.149	15.673	24.514
29.686	54.976	77.095	83.332	104.04	87.338	58.929	88.179	43.675	25.483	35.84	84.514	24.405	31.219
66.824	90.803	90.281	130.15	130.13	138.97	79.461	159.53	82.586	48.758	45.96	58.402	32.42	43.815
66.118	58.641	65.21	106.18	96.268	94.308	47.113	107.07	39.724	35.459	34.01	48.27	34.752	33.001
39.516	56.638	65.432	113.18	93.544	93.274	48.253	101.52	44.401	26.331	28.901	29.441	20.185	25.466
39.967	45.819	53.029	86.847	74.492	72.771	33.456	75.1	28.83	19.275	22.161	28.928	20.032	19.422
33.837	41.362	50.416	80.847	75.183	74.479	31.824	75.261	27.245	16.312	19.134	25.109	23.929	24.349
33.837	41.566	51.233	93.037	75.93	74.385	33.436	77.713	28.911	18.454	22.893	21.41	21.067	25.461
41.912	49.807	60.032	83.01	76.164	80.487	34.643	101.87	35.158	18.662	22.893	25.386	16.403	18.758
63.012	63.945	59.438	182.2	89.585	96.18	62.682	107.05	60.401	26.18	28.327	55.481	31.544	28.066
86.902	83.801	86.662	116.93	120.6	120.1	68.824	131.63	69.431	46.439	36.215	55.481	37	59.723
50.566	30.041	40.039	55.721	47.231	45.275	26.477	57.776	25.618	22.011	20.949	16.485	18.31	21.627
76.314	53.061	44.458	61.677	56.811	65.466	45.324	79.185	37.919	48.809	31.513	29.434	47.374	31.28
71.167	86.637	82.502	108.82	101.78	104.69	64.177	123.88	64.003	45.02	32.85	55.926	39.917	35.715
42.255	64.179	76.251	141.98	109.72	112.65	67.808	119.55	64.16	27.206	25.907	40.041	16.444	38.74
61.733	76.104	110.74	127.04	120.06	130.53	69.525	129.83	56.462	27.563	29.997	46.491	31.481	37.811
68.945	78.344	78.582	157.35	106.39	144.4	78.925	146.45	74.702	38.084	29.242	42.822	45.972	36.523
60.234	72.584	78.582	122.07	107.85	123.16	67.944	128.87	58.175	31.939	29.242	39.623	34.224	36.523
50.401	94.642	105.4	144.63	128.58	151.53	84.771	143.44	75.509	44.81	38.104	58.638	54.934	42.913
53.853	84.034	79.666	145.58	109.78	104.4	93.531	123.09	74.534	45.218	37.548	57.157	36.452	51.947
73.077	124.91	115.02	180.61	155.72	172.08	100.7	193.18	101.78	59.004	56.539	83.371	48.167	80.024
51.291	59.278	64.756	106.86	108.12	109.76	48.212	106.34	41.985	34.049	30.077	90.958	30.314	43.733
62.779	80.481	93.301	128.41	122.49	109.76	62.056	107.06	59.829	39.512	46.821	56.477	35.576	43.733
42.733	55.7	53.255	87.555	95.677	79.324	47.026	105.66	38.556	23.895	26.546	33.547	21.083	31.858
43.193	43.498	61.143	69.315	63.786	71.147	47.258	68.741	44.915	22.326	25.608	30.257	34.745	27.134
126.06	71.802	54.558	76.177	80.104	74.42	62.457	89.53	52.073	30.863	30.968	36.194	31.235	33.347
115.5	76.758	87.218	113.53	140.06	160.68	64.253	149.05	61.3	33.147	32.651	48.762	23.043	36.814
48.002	65.518	75.524	113.53	105.55	104.86	63.149	103.32	48.473	24.917	26.54	36.583	22.484	36.814
62.126	41.13	56.017	59.937	46.941	57.583	54.23	55.15	53.143	24.763	20.896	36.583	26.631	43.86
78.92	69.576	65.076	128.55	78.508	93.75	83.469	99.571	78.227	29.541	25.075	41.881	37.002	39.69
43.605	76.187	78.577	139.88	131.86	116.95	68.475	132.27	53.935	28.535	36.162	41.881	24.617	37.941
33.455	50.197	56.155	97.598	84.803	94.416	42.576	82.238	41.859	22.534	25.212	29.631	22.554	30.661
56.736	38.856	41.432	42.655	46.516	79.542	34.823	44.535	34.418	37.111	27.839	35.684	29.717	26.989
27.654	42.819	56.134	68.925	63.744	66.542	36.319	65.683	33.946	29.484	27.839	35.682	32.841	25.736
35.728	38.318	32.876	78.28	51.445	78.955	47.221	50.153	39.096	18.212	13.538	39.626	27.021	23.567
61.457	32.626	32.876	64.629	49.446	94.07	42.017	60.732	40.182	18.233	19.647	19.472	17.881	28.212
62.225	78.149	101.95	139.42	159.6	129.24	93.236	134.16	60.703	40.319	36.6	71.368	51.561	46.141
34.253	56.296	85.223	107.12	95.625	93.288	49.874	100.29	46.159	20.736	23.523	28.75	51.561	25.006
53.772	74.347	85.223	129.36	98.289	113.7	60.112	142.66	59.208	27.227	32.173	49.291	20.397	32.392
88.537	91.475	110.02	163.63	129	117.54	82.144	152.86	73.531	34.865	42.795	57.361	35.512	43.46
68.099	77.015	95.851	159.43	119.61	133.21	81.873	141.16	73.531	35.831	32.301	55.765	49.27	29.381
93.548	51.573	68.168	100.06	81.643	89.967	45.423	102.82	39.511	24.49	22.558	33.418	20.923	24.121
93.876	61.235	88.056	106.71	103.75	94.856	40.479	113.91	43.184	25.787	26.913	30.46	21.305	26.795
51.732	61.235	76.636	106.71	103.75	94.856	40.479	126.55	43.184	25.787	26.913	30.46	36.337	30.546
76.642	81.566	76.636	121.94	107.11	111.62	66.494	134.34	59.569	31.258	33.368	51.264	49.51	30.546
64.745	39.683	48.501	79.621	64.544	61.858	36.211	66.142	39.871	19.892	18.493	35.476	13.337	27.261
52.93	48.688	52.288	95.017	83.803	87.968	39.974	91.618	36.208	20.543	18.833	23.412	16.243	27.409
52.93	48.688	52.288	74.168	87.051	87.149	39.974	91.618	36.208	20.543	20.406	27.901	23.815	23.409
61.642	60.62	66.94	125.24	101.41	97.156	53.318	111.31	55.646	28.707	25.392	32.143	21.148	29.598
32.068	49.493	58.249	100.24	77.408	72.152	49.977	81.76	59.62	27.377	27.7	57.062	33.894	30.715
34.523	60.28	64.775	70.869	88.56	85.981	53.326	81.968	47.39	29.067	30.553	43.801	35.221	43.298
41.42	63.299	64.775	70.869	90.002	72.584	47.216	77.325	38.97	31.914	33.963	39.089	35.221	27.068
79.757	72.482	93.137	99.307	105.41	109.47	65.106	121.28	58.682	33.732	33.348	35.836	26.922	36.705
45.681	68.276	91.309	92.524	100.43	101.36	54.549	100.66	45.992	34.11	36.467	35.836	26.781	40.556
38.718	68.276	82.846	87.233	102.15	105.37	64.708	108.54	54.027	31.786	31.002	49.865	30.101	51.282
64.515	58.91	79.296	90.479	93.734	101.72	62.419	103.26	53.818	32.761	30.8	39.989	28.965	33.328
41.929	58.054	71.666	129.87	95.971	106.93	46.22	99.412	39.512	25.455	30.469	29.477	26.865	18.611
87.693	35.051	60.122	78.137	90.634	89.476	40.601	91.1	34.416	21.743	16.004	24.209	17.59	16.109
36.684	63.871	76.893	124.61	123.01	116.34	48.917	105.35	44.545	34.944	41.479	47.735	29.799	19.734
66.212	51.397	67.637	91.818	91.875	99.171	40.712	89.92	40.821	25.435	24.389	39.594	26.195	29.759
53.072	47.386	58.533	73.467	63.058	70.304	43.33	76.201	43.675	21.629	24.389	31.625	30.241	35.69
54.701	42.055	59.376	75.279	60.424	65.429	38.647	68.672	39.687	19.782	26.783	35.87	18.538	25.498
44.682	45.602	74.546	119.56	85.666	88.062	43.475	96.909	39.188	21.394	26.783	35.805	17.593	26.188
60.472	65.969	72.13	114.99	97.275	108.63	60.523	114.77	59.069	30.619	32.57	49.264	24.676	26.82
63.064	95.274	101.35	136.16	115.34	121.51	67.511	132.15	56.358	35.748	38.532	53.771	47.339	48.701
49.769	36.27	48.356	57.756	50.176	49.645	24.912	52.34	22.117	29.071	30.165	37.038	33.196	16.966
35.238	52.787	89.05	96.083	76.552	77.2	33.446	69.924	25.344	29.071	31.677	37.038	35.05	20.181
45.277	51.487	63.697	103.23	84.989	92.086	42.582	91.628	33.439	32.191	37.744	25.573	30.132	20.181
21.896	25.471	31.974	56.124	48.714	51.467	28.424	51.242	28.946	23.904	14.847	19.871	12.293	15.447
21.896	22.413	23.475	30.563	29.122	37.68	17.393	38.109	15.983	18.942	11.339	15.817	12.293	16.221
49.105	22.656	21.083	47.643	31.823	37.748	27.726	43.348	23.841	11.821	12.561	16.484	13.942	18.104
41.151	21.695	20.324	47.643	35.48	37.748	23.014	42.515	21.301	7.6535	9.246	12.515	7.7789	11.004
18.828	16.533	25.921	41.096	36.003	36.398	16.199	39.621	13.927	6.8525	9.106	10.471	5.355	9.9399
21.081	22.524	28.28	41.16	36.003	32.437	16.303	39.621	13.927	12.293	13.408	15.827	13.5	13.998
27.309	23.376	22.885	64.366	27.884	32.183	21.967	45.176	23.094	11.385	9.8273	15.663	10.998	11.473
27.024	24.903	42.193	65.539	41.385	44.663	31.932	63.108	27.682	12.892	9.8915	15.954	15.066	10.971
71.514	31.795	33.345	59.781	38.824	51.378	30.96	60.224	28.331	15.729	13.211	21.555	19.454	13.709
31.277	36.985	43.131	59.465	56.887	58.791	34.661	69.769	35.908	20.261	14.198	20.557	14.204	21.575
30.842	28.073	49.751	53.246	35.959	31.408	30.283	50.991	21.545	16.346	10.887	16.94	16.986	11.745
42.276	32.324	49.883	53.246	35.496	42.229	27.898	47.254	25.295	21.923	14.865	18.268	19.318	15.959
40.133	24.07	22.295	43.974	29.241	34.519	25.284	37.955	21.861	17.292	16.993	26.622	16.072	15.959
33.876	24.273	22.295	58.827	31.974	34.519	30.654	40.745	21.861	14.496	10.788	20.395	11.976	22.088
35.154	23.552	19.519	36.237	27.506	30.929	22.503	31.628	19.282	13.284	15.695	16.752	14.776	26.24
31.56	22.743	27.887	35.193	28.603	33.186	22.503	36.126	22.368	13.919	13.604	15.453	9.9385	24.607
31.56	27.412	33.596	51.653	37.871	40.016	26.263	47.383	24.479	15.157	12.545	18.492	11.33	15.666
53.616	51.333	62.546	82.694	92.297	96.991	47.054	107.53	36.176	16.943	25.594	29.219	14.186	26.943
59.195	78.107	90.394	122.88	115.28	114.14	66.525	126.96	53.515	39.314	36.011	76.84	31.05	45.405
45.435	64.784	75.413	122.59	91.037	97.815	52.729	112.48	50.535	27.432	26.838	41.694	23.388	29.348
26.761	43.72	37.905	78.251	49.6	71.299	39.471	80.8	33.632	18.277	20.559	22.52	23.591	17.685
84.679	74.091	102.85	115.72	128.87	118.09	54.157	131.01	38.678	28.984	34.558	33.407	28.545	36.556
66.012	75.73	89.947	140.65	111.17	136.3	77.722	120.68	64.689	37.92	40.439	47.098	26.96	48.914
79.286	67.495	69.865	116.73	87.135	90.789	49.508	102.26	46.81	37.234	36.406	47.098	39.871	37.258
33.938	44.538	48.562	85.63	71.914	76.331	41.243	84.605	33.72	20.214	16.236	22.388	23.745	17.153
37.249	32.229	34.873	77.818	50.807	59.204	27.838	69.211	24.408	14.863	11.674	21.315	16.572	19.994
50.623	41.411	46.375	89.105	64.747	66.519	35.977	72.655	30.362	21.063	18.241	28.235	17.318	19.044
27.007	22.386	28.906	59.191	31.527	34.377	17.45	39.73	14.952	19.798	17.194	12.44	21.309	11.041
13.125	17.923	21.257	30.424	24.144	25.713	15.532	28.447	14.952	11.184	13.413	12.44	12.908	10.746
45.8	42.636	60.395	84.038	81.565	73.954	35.011	84.156	25.125	28.346	24.098	20.337	18.154	23.985
34.212	30.265	38.235	68.437	49.568	48.297	23.586	48.53	25.125	17.566	22.181	18.226	13.011	28.001
31.127	64.865	72.292	118.31	90.897	108.11	59.408	119.53	49.564	28.052	26.427	40.231	21.571	30.543
34.652	73.617	66.122	141.24	94.37	112.77	71.051	119.53	59.653	37.158	29.844	50.031	31.059	28.99
41.898	58.887	67.677	71.952	84.033	85.56	35.853	87.703	34.171	31.229	24.292	36.76	30.26	21.255
68.95	46.435	66.274	72.857	73.456	69.411	40.673	87.703	35.226	24.909	22.342	31.764	20.789	28.622
47.547	48.284	59.077	83.255	71.478	83.499	47.649	98.877	42.712	19.2	19.035	25.868	18.806	26.295
46.013	47.642	63.244	88.922	73.662	75.697	39.66	91.366	32.152	24.718	22.236	22.512	19.716	24.105
46.589	42.716	39.339	55.327	64.521	57.651	32.106	71.396	30.425	19.969	19.978	27.556	16.83	31.979
47.112	57.571	73.206	76.122	76.231	74.781	49.132	101.6	41	24.215	23.095	29.44	26.437	31.979
40.871	30.119	48.334	54.185	46.204	68.502	22.609	66.782	22.38	10.692	14.286	15.592	15.073	19.854
52.742	38.042	40.102	54.434	63.035	55.681	37.668	68.061	27.946	15.242	16.91	21.547	14.139	21.631
63.405	60.542	74.292	100.55	82.763	107.1	52.654	117.89	48.926	24.477	20.922	37.319	17.972	34.246
103.41	76.696	81.517	132.5	111.07	116.32	72.977	157.22	60.143	32.909	31.522	47.459	27.79	49.537
42.704	37.691	42.748	60.104	51.724	57.6	39.039	71.756	30.383	16.6	18.839	23.658	17.745	27.938
56.961	41.969	58.291	60.104	67.791	64.813	39.039	76.952	30.383	17.779	20.628	27.883	19.562	27.577
66.676	75.155	82.246	115.99	100.46	112.06	68.612	142.07	57.904	25.375	29.379	37.043	27.437	32.976
53.289	75.155	106.35	130.97	113.54	121.84	68.612	144.77	57.904	31.765	31.53	37.043	27.437	32.976
68.026	47.483	83.244	74.346	84.141	80.788	36.691	86.639	32.761	22.641	25.058	39.586	34.555	30.053
54.151	40.618	57.493	65.084	61.128	60.829	36.691	66.496	32.52	17.418	17.299	20.415	14.87	27.552
60.925	25.678	51.712	29.364	42.028	38.631	27.18	47.781	22.69	15.711	10.5	20.415	8.5081	23.986
64.594	28.97	33.18	45.792	36.8	38.675	31.729	47.699	27.632	15.009	11.989	25.762	14.63	23.787
49.453	21.264	40.355	35.333	28.679	40.861	25.527	29.762	21.376	9.0724	12.941	25.762	6.4968	27.384
59.762	28.018	42.738	61.682	46.901	41.821	29.635	50.926	24.586	12.722	14.326	27.393	12.169	30.666
69.385	41.97	55.6	86.755	61.798	75.414	39.267	78.524	33.334	14.125	16.587	28.626	20.874	36.212
47.668	38.142	52.327	83.129	60.104	71.786	39.267	78.524	33.334	19.501	18.496	23.162	16.609	24.133
74.842	43.401	53.848	86.77	71.697	65.266	42.374	83.065	33.828	31.253	23.901	30.607	32.322	28.286
31.218	25.894	33.522	49.088	44.004	44.148	23.09	50.397	19.038	18.539	15.254	19.169	16.691	26.213
29.063	35.732	43.349	56.087	52.794	50.457	26.576	52.522	21.219	14.208	19.564	28.885	19.165	16.259
31.905	47.224	68.871	75.032	83.245	81.406	39.346	85.034	29.214	19.944	23.554	21.322	14.474	23.42
38.862	38.003	48.887	75.032	78.403	74.903	34.142	65.834	28.872	14.648	19.195	16.742	14.474	13.711
58.536	57.742	61.662	89.002	77.513	77.593	48.916	95.705	46.42	25.122	26.031	27.388	21.791	20.91
53.998	30.369	40.548	48.842	51.673	59.779	35.066	56.418	26.561	21.1	18.143	23.015	11.716	20.91
38.116	27.689	38.15	49.293	61.754	56.924	23.813	51.981	19.996	9.0394	14.538	14.213	14.137	12.811
66.691	30.898	39.071	53.889	62.87	52.721	24.275	52.803	21.08	14.533	15.594	21.325	10.097	19.008
37.572	25.663	36.116	40.809	47.151	48.219	19.135	50.86	16.464	12.778	15.616	13.192	21.648	11.378
22.138	31.156	49.419	55.938	44.615	54.139	25.021	45.903	20.785	12.74	14.191	16.191	13.092	15.997
36.448	45.409	62.313	61.785	60.074	66.75	35.557	64.661	33.266	19.09	23.148	23.233	16.322	21.271
42.858	59.296	68.228	103.33	88.649	90.698	52.19	87.197	52.357	35.083	30.705	45.215	31.652	30.352
45.745	57.184	68.228	86.988	84.963	100.37	44.387	92.013	41.736	36.163	34.35	48.942	38.836	30.315
31.433	39.667	56.764	62.752	76.05	90.36	33.672	79.43	28.151	14.397	18.449	23.485	19.069	23.122
35.185	33.818	42.819	62.547	49.053	57.622	33.672	55.431	23.024	14.362	18.259	26.375	17.463	23.122
56.22	36.513	42.819	68.646	55.145	59.948	34.698	59.049	32.873	22.766	22.416	35.846	18.359	22.885
38.289	47.651	52.783	80.005	67.662	102.77	46.126	72.787	48.629	22.839	22.788	33.02	19.594	39.158
48.902	58.592	57.757	110.49	86.076	94.537	58.575	111.83	48.22	25.589	23.307	37.512	21.568	27.69
35.233	48.756	57.379	64.152	80.576	87.525	33.174	72.954	32.301	24.02	25.104	33.887	29.959	22.495
76.542	72.854	65.778	119.82	86.384	107.99	74.174	130.65	70.469	30.185	28.846	48.151	28.64	36.186
66.015	74.377	65.91	118.53	98.618	111.48	59.003	124.82	55.697	33.442	37.771	57.718	28.64	37.38
52.826	59.309	57.569	95.009	84.68	103.88	55.461	100.67	42.518	29.804	32.056	55.004	27.304	29.721
48.831	43.911	63.599	92.167	76.339	105.47	42.928	76.57	36.888	19.154	20.479	27.097	18.116	25.481
37.879	39.107	41.826	54.276	56.002	49.827	39.343	61.459	33.854	19.47	20.346	21.616	23.261	18.602
29.085	31.955	35.094	57.345	46.324	51.285	30.772	58.856	32.333	20.293	20.346	24.177	23.261	15.148
49.741	25.364	38.691	78.693	56.435	53.443	29.172	72.763	23.116	11.572	13.104	23.764	13.327	37.545
89.678	105.82	106.18	108.97	123.54	121.99	70.695	125.48	61.431	115.4	127.48	58.891	133.43	63.281
67.002	122.65	110.52	108.97	137.37	197.88	66.395	107.22	61.431	136.56	106.38	52.884	130.43	42.04
67.002	166.47	108.91	165.91	137.71	166.48	123.65	166.91	154.06	180.91	146.18	181.47	151.96	177.09
83.818	118.71	97.362	176	112.82	147.71	161.23	175.4	179.59	94.248	110.15	91.85	103.68	87.641
90.143	101.47	171.93	152.74	132.17	128.35	159.8	118.93	157.65	73.792	89.289	92.1	84.804	109.74
100.88	144.32	165.9	152.74	132.17	135.37	113.94	136.57	104.11	125.47	126.76	102.5	129.67	97.138
66.516	102.38	113.9	131.02	110.41	113.58	95.872	128.48	88.652	68.115	76.843	142.3	63.984	143.52
168.87	194.52	149.76	215.4	172.34	195.58	162.68	213.22	189.82	239.33	183.29	196.2	179.6	201.1
157.28	176.74	191.26	230.27	186.64	195.58	163.89	237.59	196.98	151.22	156.2	131.36	169.93	147.22
144.62	190.23	216.95	230.27	236.27	213.01	188.39	236.46	181.9	133.9	134.29	159.06	123.11	156.1
129.46	128.12	183.12	210.32	224.49	206.87	181.79	243.19	171.68	108.08	100.32	91.181	122.63	109.11
88.863	98.435	152.97	131.98	119.04	116.88	104.05	122.25	88.645	86.029	80.014	85.808	82.514	78.193
80.145	146.38	104.53	190.71	136.25	152.21	203.33	164.27	201.24	120.6	100.53	127.68	97.831	129.91
72.352	88.583	90.792	135.74	114.93	141.38	92.874	145.25	72.736	62.102	64.227	83.274	75.788	91.958
72.352	71.543	71.292	98.974	86.553	95.607	78.561	119.9	61.299	40.26	52.648	50.125	43.432	59.238
108.35	87.143	74.297	93.587	92.609	95.334	66.535	117.58	68.17	96.486	91.795	117.1	97.033	126.09
65.766	120.19	128.28	99.248	116.99	130.63	46.844	124.43	47.804	162.99	154.75	79.798	180.24	97.538
142.37	121.36	128.28	212.62	144.53	151.81	164.05	161.27	131.46	131.37	136.21	102.84	121.54	126.57
141.48	121.36	110.9	184.76	132.95	138.82	181.56	171.75	161.96	107.61	80.391	123.73	103.56	119.75
120.46	118.36	110.9	132.98	114.01	107.73	115.4	138.94	130.1	104.11	77.186	97.796	96.505	120.21
113.52	136.18	99.701	132.98	103.38	117.94	81.201	138.94	69.786	135.45	130.33	122.18	141.65	129.43
99.527	209.77	181.82	161.99	181.68	169.07	199.08	170.37	213.97	174.72	193.4	162.96	206.37	187.69
192.87	125.66	164.42	161.99	149.11	147.12	200.25	170.37	192.42	55.877	87.688	142.49	72.605	148.68
154.9	171.42	150.87	160.21	157.7	153.25	184.75	148.7	170.7	127.04	163.39	181.7	159.42	136.26
124.51	177.75	154.93	140.57	167.03	154.05	243.76	146.64	209.78	181.76	127.39	207.3	142.57	119.91
155.6	120.69	147.05	148.94	156.75	144.45	147.74	143.86	124.68	99.62	115.54	86.889	83.672	50.551
143.7	187.96	147.05	178.95	167.1	155.34	234.97	177.49	211.36	135.89	142.03	203.64	115.82	197.33
135.92	107.3	105.11	125.23	111.4	106.64	124.63	90.675	123.83	103.45	108.08	120.7	115.82	142.76
194.84	109.92	157.16	97.237	115.06	106.64	155.61	87.238	166.62	153.75	150.13	102.54	153.73	108
123.75	298.28	288.27	229.24	296.04	268.8	127.75	227.43	115.78	238.76	248.9	223.29	233.97	204.68
113.83	99.7	62.674	87.92	74.341	91.777	74.707	84.538	70.543	115.51	92.783	116.97	115.08	112.54
112.52	115.75	163.35	198.44	157.68	154.85	120.86	207.78	112.63	67.259	73.046	105.97	115.08	80.312
73.824	108.08	82.395	126.23	103.99	127.32	91.381	108.79	84.429	97.635	106.35	147.87	130.92	142.1
232.15	192.01	187.62	235.97	215.95	215.88	165.96	223.3	144.87	171.77	163.76	155.76	131.27	187.85
252.62	148.33	136.17	157.68	140.34	130.7	150.31	154.22	132.46	179.07	133.58	144.92	184.55	183.26
70.171	139.88	121.34	147.25	140.34	122.64	150.31	141.35	132.46	97.687	96.505	134.78	112.6	183.26
138.5	112.97	81.075	102.47	90.026	89.303	141.75	93.395	148.09	124.25	144.32	160.19	121.1	143.81
89.212	59.926	66.928	87.434	70.892	71.002	99.407	74.479	112.47	58.693	55.417	66.16	63.061	85.494
107.21	138.54	132.21	145.64	123.79	120.17	159.96	147.14	134.63	113.75	131.09	166.06	90.005	140.88
61.762	78.532	75.596	85.833	82.835	95.948	106.93	104.48	105.96	105.84	127.72	84.284	90.005	88.897
188.96	195.77	130.48	152.75	164.39	175.49	160.44	156.53	170.41	160.15	144.61	178.08	147.02	173.37
206.88	118.39	100.72	109.34	125.4	135.81	135.35	124.34	166.03	125.94	181.83	144.49	173.71	162.39
118.29	108.26	124.2	130.18	134.57	121.33	136.28	118.3	166.03	112.99	113.58	113.86	104.38	136.71
136.88	156.52	178.29	142	170.46	147.95	194.79	157.68	192.54	98.865	142.87	147.41	118.57	132.8
77.306	71.576	65.163	78.854	67.774	80.272	114.55	80.964	136.89	94.011	115.38	69.883	127.76	97.485
123.13	105.65	82.423	124.54	98.148	128.79	146.51	142.86	141.75	117.87	123.49	86.874	141.94	90.971
88.899	149.73	121.47	97.835	110.03	107.74	146.51	92.705	144.21	110.09	110.85	147.8	109.5	144.72
139.58	165.99	174.83	136.26	160.88	167.92	154.21	116.01	141.43	203.87	228.83	182.12	189.28	144.72
84.478	167.55	106.7	161.14	148.54	156.36	140.75	180.39	123.29	130.39	128.57	185.72	117.49	143.31
167.35	146.27	141.4	148.86	155.11	159.88	148.54	140.19	123.51	153.25	146.3	145.97	156.2	130.72
148.56	127.94	121.67	173.61	140.42	156.96	131.3	183.54	123.51	115.63	112.23	101.86	126.85	90.453
148.56	128.25	159.97	141.33	137.69	112.64	275.19	115.76	235.34	105.45	109.82	220.4	156.09	253.63
89.941	189.72	114.74	152.4	153.66	175.33	152.26	153.34	119.25	153.53	170.6	208.99	175.71	205.32
161.16	139.13	114.74	120.7	134.9	118.3	109.32	129.55	103.32	200.05	198.35	173.36	176.83	136.87
198.79	85.932	60.628	93.955	70.459	99.02	196.13	96.206	187.79	128.46	111.32	111.69	128.25	149.35
69.065	110.93	138.46	147.02	147.82	164.2	108.26	144.34	80.206	128.46	111.32	76.657	125.17	88.203
112.24	121.75	155.8	158.85	146.72	152.34	196.5	170.67	231.6	89.607	87.621	133.41	75.164	112.41
112.95	114.58	124.39	131.66	124.75	126.06	160.96	123.65	164.74	96.729	118.13	91.583	108.53	85.792
114.25	130.68	122.77	114.77	127.58	137.53	92.882	114.57	104.06	128.59	118.13	112.69	108.53	114.89
114.28	144.17	142.74	160.04	174.54	161.15	115.47	155.36	104.06	159.23	135.03	167.47	119.32	165.38
122	111.45	76.405	94.507	86.286	89.959	80.879	108.76	91.839	204.96	138.65	170.34	169.54	212.86
210.31	213.37	139.61	173.61	142.17	178.93	222.03	176.17	207.92	205.51	195.59	229.74	172.7	239.1
210.31	194.24	211.7	176.99	186.58	191.26	239.53	172.65	228.86	184.6	203.42	197.24	183.12	211.22
173.12	153.95	219	146.5	164.76	143.29	168.38	130.84	165.44	181.24	203.42	158.94	183.12	111.72
154.88	87.894	116.57	116.77	90.623	86.852	121.04	106.17	130.95	143.37	133.3	87.685	124.98	106.11
106.25	31.852	29.829	80.733	45.502	58.735	49.501	80.111	48.539	71.826	72.108	67.495	64.154	59.864
79.245	90.325	48.869	97.681	66.94	80.302	98.015	85.383	110.67	149.84	146.53	52.005	160.44	58.56
106.53	171.97	125.2	97.921	137.26	146.82	97.92	107.87	108.58	182.42	226.22	207.05	188.65	204.23
68.705	66.595	93.223	72.607	104.76	91.458	45.307	79.694	38.313	46.243	57.609	90.345	57.214	70.037
101.26	69.917	103.9	90.744	86.4	78.884	127.43	97.278	145.01	56.095	89.782	100.82	80.645	149.82
159.17	139.27	86.567	82.155	85.685	87.723	127.64	62.437	142.27	147.71	136.64	174.82	146.59	175.52
222.6	143.62	127.82	148.11	143.84	119.29	177.73	136.33	168.37	183.97	186.32	187.05	187.11	175.52
171.62	143.04	88.837	148.11	93.619	119.29	216.16	134.15	233.67	176.84	186.32	216.19	187.87	166.5
157.64	208.94	133.26	151.31	157.71	174.07	164.88	162	166.67	255.52	237.98	202.36	225.65	223.6
107.09	159.21	123.42	105.04	136.92	129.61	78.106	109.19	58.546	243.86	226.48	159.41	215.84	68.651
85.799	60.404	69.21	66.821	54.151	67.498	75.3	59.09	72.899	54.594	40.157	99.918	54.109	115.48
93.443	129.4	122.06	103.35	120.35	110.4	115.98	98.545	120.83	140.66	183.34	241.23	169.39	229.24
136.32	129.4	122.06	115.63	120.35	111.26	221.58	102.81	208.95	102.29	142.12	144.09	122.61	184.85
90.904	140.74	151.03	175.92	169.59	175.18	203.36	210.55	209.39	150.49	161.74	176.27	192.88	161.28
139.07	189.88	164.66	198.73	163.39	148.06	207.27	156.79	227.93	150.49	187.25	203.07	186.15	194.21
128.32	190.5	151.77	148.16	158.46	141.92	187.2	153.26	178.14	134.47	129.39	222.06	115.18	231.79
194.52	199.44	200.16	159.98	200.81	183.78	184.5	158.45	182.69	222.86	227.74	265.18	213.22	252.47
115.95	106.16	139.1	91.623	130.95	97.161	162.28	118.36	182.61	108.01	122.3	169.03	96.114	144.36
138.21	136.93	123.01	104.94	126.55	133.42	83.987	118.15	96.741	141.2	142.33	166.16	174.59	157.25
107.31	142.55	165.67	112.23	151.71	133.42	127.82	118.15	121.94	152.27	176.27	145.59	175.6	134.84
169.91	266.18	259.94	195.73	249.45	239.2	231.66	217.73	245.28	220.37	199.31	272.92	199.95	256.27
167.9	174.11	177	94.85	154.51	135.05	160.45	96.2	139	242.33	211.2	272.92	212.05	221.37
174.17	138.32	161.09	97.578	154.51	135.05	166.89	96.2	164.81	130.46	144.81	133.11	118.3	94.877
129.89	95.758	152.67	123.04	153.08	141	102.72	131.17	103.57	116.77	141.68	86.416	128.44	102.2
94.561	95.758	107.69	97.21	105.48	102.92	90.27	93.633	103.57	116.77	141.68	119.16	184.43	144.24
95.457	156.99	224.5	128.26	170.03	142.77	140.73	108.55	121.73	198.72	197.62	139.96	183.09	144.11
151.97	94.953	91.436	95.71	89.357	110.42	79.827	106.63	78.43	113.83	118.44	114.33	102.03	144.11
137.42	105.62	165.74	98.181	120.78	110.42	72.988	100.26	61.982	117.03	116.88	119.4	103.5	83.368
163.87	136.1	192.32	154.87	137.59	136.31	127.98	158.86	139	146.71	121.86	178.38	126.12	171.15
118.39	145.5	90.96	108.3	98.102	115.72	159.33	113.33	175.69	112.16	147.16	152.84	157.78	154.32
75.026	62.814	78.68	83.376	69.824	85.439	77.907	75.968	96.772	82.491	94.587	56.137	90.697	79.519
123.47	58.851	76.899	69.156	71.668	74.559	60.776	71.377	69.94	58.145	52.583	71.799	68.259	98.955
112.74	129.91	97.562	90.827	63.363	65.951	123.19	82.654	126.27	171.03	148.5	168.43	156.73	199.97
113.73	189.85	107.96	100.24	91.245	115.61	116.45	82.149	154.68	226.98	212.12	210.76	226.43	200.45
79.042	119.77	89.052	71.714	91.084	94.963	95.194	75.167	119.06	190.81	165.73	153.72	201.63	159.61
154.61	216.84	252.68	143.94	218.52	234.38	162.69	148.69	167.1	191.12	207.18	203.17	201.63	223.63
112.46	161.44	126.08	102.37	124.02	119.05	141.23	104.61	127.2	177.34	190.49	183.79	186.64	195.22
146.77	133.82	134.56	107.52	129.54	127.89	93.071	100.3	85.59	178.37	176.39	123.54	127.2	98.842
106.42	89.224	93.372	69.856	91.834	87.704	93.071	61.609	85.59	123.11	136.68	123.54	145.49	162.62
148.78	92.703	153.37	153.68	118.29	114.14	131.36	108.88	128.8	122.36	129.2	161.26	233.5	102.78
118.83	143.96	144.95	138.06	134.05	155.13	174.97	122.06	173.5	133.85	135	179.62	127.56	164.63
121.33	146.96	116.65	172.52	135.67	146.38	163.83	159.04	152.29	146.66	129.46	127.22	143.3	123.81
126.58	155.86	168.21	78.191	127.19	96.003	110.87	66.118	115.3	219.82	221.1	209.99	216.64	264.56
35.915	83.581	85.425	96.642	83.982	83.91	83.484	96.983	62.155	76.626	62.228	61.513	78.65	28.938
68.194	35.313	69.471	67.485	48.199	54.639	39.761	60.713	36.71	16.418	16.661	29.993	11.464	22.834
61.149	46.494	44.283	72.081	67.402	87.671	40.591	90.558	31.251	24.539	16.326	27.581	16.014	35.184
38.14	53.243	81.222	116.44	86.034	92.431	58.812	103.11	48.729	29.613	26.7	30.022	20.079	40.225
46.05	22.458	30.319	48.463	27.046	46.171	24.734	40.609	24.436	12.209	12.689	17.832	15.909	23.368
59.3	51.729	32.954	53.927	36.963	41.352	49.059	54.487	49.099	54.544	53.374	46.477	70.244	44.249
65.91	90.943	48.017	82.764	60.679	117.42	89.342	89.303	91.405	107.64	93.226	84.756	83.256	66.716
44.924	154.58	85.921	101.74	106.66	110.81	84.287	109.04	71.997	186.17	185.75	146.84	193.02	122.61
55.076	96.111	103.75	132.72	128.28	120.2	105.05	160.31	102.05	89.931	80.323	89.097	88.635	85.964
66.523	85.336	48.414	65.711	61.234	62.713	49.67	60.558	54.716	89.089	74.365	86.486	114.66	90.982
58.815	95.075	42.107	52.272	50.007	64.242	49.67	52.118	48.155	140.13	137.19	86.486	169.74	99.19
104.45	107.91	95.879	109.25	113.08	114.38	83.701	109.04	87.327	137.99	148.63	93.272	148.99	102.4
156.82	146.92	129.65	113.58	106.27	111.24	141.07	97.705	144.26	141.78	151.09	144.53	147.27	194.62
77.901	107.53	142.89	103.46	128.57	119.24	84.499	108.16	95.173	114.5	122.96	99.534	120.74	70.107
90.461	49.01	103.97	106	85.07	87.77	129.55	77.78	120.61	77.225	114.41	113.54	120.16	113.57
100.24	91.651	87.167	107.64	105.27	129.18	116.05	114.18	114.59	107.14	77.636	95.443	85.043	85.226
106.85	94.388	87.167	92.402	105.27	111.48	79.9	97.166	96.61	115.79	126.56	112.75	187.24	90.786
122.84	158.65	149.47	125.19	145.15	130.75	120.89	127.86	117.69	206.54	185.65	135.33	192.11	141.85
138.99	198.33	180.77	184.09	189.67	169.67	149.19	180.29	130.25	180.66	166.11	190.13	156.91	200.25
128.89	132.71	197.67	181.02	175.77	152.19	163.56	143.18	139.17	125	153.18	118.27	113.94	90.878
159.73	169.36	190.46	155.6	163.31	153.43	175.31	135.3	187.99	138.47	150.43	154.22	126.76	172.39
112.4	98.723	74.198	80.512	71.627	81.181	152.83	68.383	164.93	78.385	79.784	147.07	79.1	157.34
126.49	181.07	180.81	147.12	145.65	133.57	229.51	152.24	198.36	194.63	204.94	216.89	208.52	242.29
132.02	125.32	178.79	111.2	130.1	124.31	159.95	124.74	156.5	121.84	126.06	175.16	142.15	134.16
89.599	104.19	152.7	132.34	148.21	139.69	95.651	149.59	89.761	137.52	140.94	100.3	148.65	84.877
44.729	45.949	51.791	77.185	57.541	60.13	67.482	75.568	61.35	36.783	32.656	41.923	71.897	66.81
111.25	87.781	119.07	116.66	119.73	110.37	150.09	107.39	167.45	95.854	81.531	115.41	102.15	161.18
77.711	108.43	89.095	123.37	104.68	107.56	96.974	107.39	135.02	140.07	131.97	109.85	135.1	173.43
106.01	142.13	135.42	99.42	115.82	110.24	200.76	108.67	187.95	157.69	169.86	176.89	133.4	179.87
80.738	234.52	293.44	261.93	254.03	206.02	225.42	208.74	183.51	185.08	185.15	196.11	145.47	141.2
66.568	155.57	127.88	126.91	100.66	114.79	192.58	123.6	183.51	136.51	127.83	195	124.29	221.78
38.21	44.277	33.997	38.833	32.238	44.11	39.72	37.574	30.295	87.078	83.188	36.758	99.439	45.625
64.702	105.59	77.401	34.014	70.649	71.73	119.08	51.222	104.35	118.28	103.09	114.9	127.29	123.31
126.29	116.05	101.05	150.22	130.65	147.98	171.95	165.19	165.2	80.879	68.711	114.9	81.995	128.02
105.67	115.35	101.05	114.3	130.65	114.7	180.83	106.34	201.71	104.06	132.48	95.387	102.6	100.12
138.2	87.633	76.187	69.288	63.744	69.112	78.668	65.198	82.502	98.454	112.8	117.97	104.03	137.49
67.889	87.633	59.928	56.766	48.154	63.696	97.453	52.23	86.825	147.08	104.33	117.97	118.91	137.49
87.611	201.58	127.36	88.59	104.7	120.43	117.25	88.189	105.66	214.55	214.57	164.18	192.95	179.56
130.65	192.59	214.43	126.7	178.43	190.6	142.06	136.27	164.09	153.72	160.1	176.75	157.13	197.19
187.88	142.01	168.25	144.73	152.84	167.82	129.8	128.68	129.11	130.01	107.62	164.16	151.5	160.41
119.72	151.97	132.13	150.75	152.84	179.01	118.01	132.56	135.47	197	186.65	160.71	192.12	145.81
163.85	89.078	81.92	110.05	96.251	104.38	144.8	117.63	151.89	88.485	78.989	84.695	110.41	113.7
71.821	106.84	105.07	127.23	96.251	102.34	113.97	115.67	126.2	137.26	136.33	86.371	154.77	107.67
48.601	97.095	95.117	101.79	102.86	106.84	105.7	105.35	126.2	137.26	125.01	76.193	140.32	88.065
130.66	110.32	140.02	136.37	146.2	135.3	136.9	141.87	133.67	77.551	116.52	76.193	97.581	76.764
156.06	149.08	213.32	151.85	165.09	137.36	189.34	137.1	199.83	183.2	227.54	170.12	205.12	133.14
69.986	45.95	60.304	61.225	55.947	59.257	87.891	60.09	107.11	111.75	123.91	75.878	116.99	64.238
61.134	87.09	83.893	159.67	137.9	134.59	62.338	154.03	58.755	35.922	36.885	39.891	30.293	49.337
32.843	39.025	34.042	49.541	38.688	43.405	45.016	51.873	49.341	30.762	26.357	36.553	35.822	49.337
23.691	34.962	29.791	30.409	30.557	39.75	17.326	27.863	16.291	49.63	27.065	51.67	43.837	48.203
45.14	69.804	36.756	53.975	45.568	57.358	68.765	53.142	60.721	80.053	80.651	76.629	80.283	95.043
72.875	174.56	103.7	94.592	135.01	138.66	86.151	115.01	67.376	187.02	191.21	107.69	226.1	77.701
87.997	112.15	69.264	86.91	80.888	86.926	85.313	72.62	89.633	235.69	182.35	190.67	180.11	169.23
145.57	146.12	94.633	82.842	89.897	100.62	96.53	82.14	105.84	164.76	154.81	154.37	177.44	169.23
134.16	211.45	227.25	204.71	239.65	209.41	193.42	213.37	147.87	209.86	214.5	209.61	196.49	186.87
127.72	184.43	227.25	192.58	239.65	209.41	153.6	213.62	163.23	179.21	186.69	173.85	152.66	190.72
79.802	119.39	176.81	109	171.41	164.88	116.29	110.41	113.23	122.89	122.61	121.49	124.01	113.39
58.878	116.58	94.632	81.525	94.277	96.257	90.262	88.334	104.04	108.76	145.66	144.41	137.43	134.91
58.878	123.57	89.238	86.296	90.332	78.129	188.58	90.638	212.66	96.191	109.35	149.77	106.18	181.58
212.11	206.23	168.34	104.93	142.54	151.47	135.26	116.17	149.69	207.31	178.65	226.28	188.65	190.29
135.61	131.02	136.39	112.22	152.12	141.25	142.92	128.6	168.5	139.3	152.54	114.48	151.77	116.31
115.09	143.38	185.26	151.19	169.24	166.43	108.9	145.36	97.638	150.98	165.11	140.88	138.84	135.7
75.756	116.01	99.12	126.38	116.34	138.24	127.01	119.14	123.68	104.27	116.98	85.249	123.14	97.931
112.29	108.55	148.68	117.88	156.34	171.39	82.873	119.29	58.023	121.32	109.33	116.38	102.78	73.137
52.627	77.542	78.804	39.545	68.512	67.285	79.994	61.369	78.391	100.57	89.898	97.8	89.036	91.88
70.044	83.333	107.05	82.139	98.357	78.445	67.474	84.239	94.203	109.9	128.12	82.681	123.85	111.09
165.04	123.66	126.76	92.289	112.62	116.78	86.969	94.36	94.636	100.96	115.49	106.17	135.55	137.68
174.86	123.66	153.59	105.93	143.9	141.42	111.3	127.38	136.67	162.6	147.12	155.1	226.04	137.68
239.25	176.51	187.54	142.8	174.17	145.78	159.55	147.21	171.76	201.52	181.23	229.15	190.99	208.02
143.35	166.86	243.35	114.99	201.46	164.71	174.51	114.44	188.88	141.01	191.08	158.15	170.84	136.02
121.89	111.79	163.3	102.1	129.06	102.81	143.67	117.39	143.42	136.14	167.08	103.87	126.87	100.16
101.69	113.85	177.02	112.1	190.67	179.09	145.42	151.14	156.63	132.72	144.87	160.06	158.5	170.46
143.74	161.24	167.33	177.49	153.69	194.31	236.18	157.84	242.68	143.49	139.58	163.95	166.88	150.44
110.73	161.24	79.536	133.73	108.15	138.92	144.94	143.54	124.71	143.49	139.58	156.86	182.36	135.4
133.16	101.21	136.14	101.17	108.99	106.35	102.18	103.59	129.19	86.812	110.29	138.2	82.971	162.37
111.43	93.131	92.019	98.752	77.722	96.041	93.565	87.068	119.84	145.04	135.85	130.96	135.3	109.32
105.12	107.06	110.65	102.82	114.09	108.39	75.616	89.115	68.061	130	127.77	102.95	127.51	95.747
127.16	127.94	128.31	102.82	107.23	108.39	115.15	100.34	123.9	95.461	90.626	163.32	85.05	143.28
148.31	149.8	195.32	120.06	155.18	146.54	165.01	118.89	176.89	125.49	144.05	171.15	121.89	194.74
74.85	77.744	75.158	66.35	88.92	79.248	85.658	81.292	80.499	59.539	66.904	114.47	66.753	130.24
95.09	72.752	52.742	78.226	62.471	73.145	91.742	78.628	82.815	87.026	81.133	126.43	149.67	115.23
76.559	144.83	106.72	103	109.48	130.47	98.578	83.38	90.749	195	195.97	117.2	168.52	74.039
189.32	256.47	242.94	290.71	265.12	252.5	257.76	253.95	223.3	201.14	198.44	269.2	221.64	203.4
198.61	256.47	213.54	151.6	188.53	191.21	257.76	183.86	267.69	264.86	256.81	371.37	263.36	377.96
93.689	97.745	120.67	129.33	117.37	152.95	147.2	127.27	155.74	104.4	122.13	119.22	118.81	106.49
113.05	91.834	99.142	89.768	86.64	93.598	85.717	76.79	94.161	144.17	126.87	100.08	117.29	126.17
112.66	98.407	77.368	54.176	66.815	76.645	100.23	59.34	95.526	144.17	126.87	100.08	326.59	126.17
105.67	89.963	58.351	77.979	56.986	66.827	100.23	71.507	91.013	131.99	117.88	115.8	140.13	120.78
102.17	92.624	88.855	91.481	91.653	87.897	69.851	97.002	61.678	111.65	112.4	109.98	103.2	103.88
128.68	111.24	87.494	90.4	94.043	125.7	109.7	75.354	115.65	103.3	119.91	112.2	131.86	103.88
132.51	126.36	162.79	161.43	166.48	162.55	134.05	159.01	150.55	98.056	119.91	109.5	123.82	123.7
181.75	138.25	144.99	81.211	131.53	139.66	117.47	125.66	153.46	185.59	206.75	181.18	194.14	160.34
177.15	138.25	123.96	108.9	137.96	141.79	128.17	126.56	153.46	185.59	186.08	211.72	213.86	203.7
132.29	122.77	113.33	83.416	94.898	83.808	108.41	84.798	113.45	185.45	195.35	169.27	171.95	125.41
109.74	122.09	99.896	93.803	86.08	92.877	92.838	90.442	83.214	122.55	123.67	146.55	136.61	137.28
109.74	122.09	65.465	87.14	62.691	83.613	103.56	77.362	109.36	106.23	121.95	106.29	116.01	164.05
65.813	154.34	101.16	85.248	68.832	86.637	145.7	75.95	155.42	132.19	133.67	120.07	116.09	108.07
62.57	88.387	101.16	48.442	68.832	63.045	122.53	51.307	173.82	119.07	112.78	96.717	100.58	115.17
77.509	84.714	57.389	41.099	43.599	56.544	54.81	41.767	68.715	126.18	105.31	64.029	105.97	76.762
53.353	64.301	38.936	40.821	43.599	46.54	68.653	34.166	68.715	69.832	69.31	94.402	72.784	114.16
40.998	34.684	27.046	37.774	24.691	32.907	48.571	22.539	50.622	38.663	31.377	32.104	51.614	72.651
56.418	54.655	33.097	51.109	40.494	53.974	41.467	51.121	42.022	77.55	77.599	22.41	93.616	39.189
32.181	44.123	21.386	30.724	28.478	40.951	31.776	31.116	30.943	64.499	57.948	25.549	67.203	28.836
22.596	21.594	16.338	36.27	19.582	35.362	30.122	27.048	37.16	14.024	9.8402	25.549	14.131	73.889
27.561	20.208	14.349	42.336	17.619	18.273	26.163	27.048	35.648	25.357	16.159	22.297	20.821	50.68
33.287	23.093	14.349	25.266	19.876	25.345	34.722	25.341	38.64	48.573	21.086	14.422	32.961	61.216
39.702	22.89	17.906	26.943	19.876	25.345	22.564	22.524	29.491	22.439	12.35	27.293	23.609	87.505
38.219	31.17	36.853	71.978	51.16	45.333	24.619	47.936	26.148	14.931	14.528	18.934	17.763	20.061
33.808	33.998	48.018	68.34	60.24	61.315	40.689	68.558	33.136	16.363	19.875	20.592	17.213	24.215
18.684	24.132	14.817	43.184	23.159	37.579	26.098	32.008	22.043	11.942	10.572	14.829	28.096	15.075
15.323	19.967	28.26	32.118	26.674	35.62	20.278	27.779	18.765	11.177	11.532	14.817	14.001	14.919
38.239	24.978	15.813	70.419	19.932	43.585	21.27	26.701	18.995	41.727	21.909	31.916	44.144	45.808
68.88	85.439	86.706	78.8	50.215	85.674	46.544	80.968	46.606	127	112.97	68.513	103.98	64.604
57.509	55.132	72.339	97.383	42.544	72.485	45.834	84.77	53.914	72.444	50.809	74.004	70.992	74.215
170.11	97.472	124.58	112.78	118.42	117.9	110.64	112.17	107.27	106.12	123.63	54.664	106.67	73.475
94.706	102.91	148.5	84.343	110.87	84.57	115.76	88.41	108.49	96.506	86.927	107.2	101.22	154.13
91.712	85.521	109.3	90.759	119.21	98.464	76.131	106.85	72.021	97.964	111.61	93.928	101.55	98.99
88.33	83.447	99.274	81.272	93.252	83.803	139.27	87.724	140.63	60.543	92.953	65.383	74.658	124.78
102.37	52.841	122.16	71.87	93.252	70.969	120.54	69.149	113.34	57.043	56.49	69.292	71.742	133.13
102.37	77.147	52.127	67.29	66.43	70.969	121.77	66.705	125.65	103.8	67.202	128.24	92.286	125.48
88.778	81.268	47.23	67.29	60.256	74.692	78.016	66.705	108.59	106.25	86.841	99.254	131.73	124.02
88.32	157.05	100.9	99.676	101.87	107.43	112.81	89.526	110.51	197.76	151.51	180.86	168.38	181.94
129.1	143.65	52.108	63.573	48.597	66.162	73.248	63.857	84.012	214.22	151.51	171.56	176.11	110.1
32.953	51.012	25.22	25.574	22.219	30.986	29.991	23.758	25.962	61.056	51.752	56.369	67.417	62.413
44.436	39.045	24.812	21.158	19.342	27.276	26.435	16.203	22.545	54.566	48.441	56.369	66.368	62.778
24.455	19.548	17.478	34.669	20.458	20.991	20.892	20.663	17.493	17.189	18.145	18.641	18.436	39.225
28.339	45.688	42.013	59.846	54.582	55.04	35.288	56.501	38.25	25.056	31.385	42.451	44.661	46.271
45.881	47.488	67.343	65.736	67.438	61.569	42.886	74.606	35.215	24.136	18.712	31.927	28.976	26.345
46.768	35.93	29.289	61.896	36.914	37.332	28.823	44.366	27.955	45.083	28.105	24.885	52.838	20.229
36.039	35.93	29.289	52.599	21.756	34.097	33.383	33.641	25.546	47.42	36.831	31.567	49.368	27.776
46.442	93.695	55.638	78.253	57.744	67.231	54.112	70.601	49.754	138.81	127.86	97.71	152.12	48.471
76.502	123.3	118.92	117.53	108.11	100.59	89.163	97.297	94.76	85.048	67.944	142.47	94.303	92.7
74.539	71.738	57.357	68.285	54.997	61.235	72.731	63.255	69.572	79.505	60.505	74.776	78.557	72.831
97.843	103.38	84.932	92.723	121.96	143.05	103.79	120.88	108.37	111.47	121.32	87.004	126.06	34.893
139.45	116.78	133.33	145.55	175.05	143.05	103.79	153.54	108.37	111.47	154.8	65.828	143.55	76.055
104.17	56.849	68.324	63.876	60.53	59.745	86.607	65.651	73.412	36.993	26.021	54.751	36.362	61.908
104.17	58.923	44.185	102.14	62.258	77.12	77.522	71.37	71.174	69.95	62.468	35.438	77.974	55.081
59.055	75.508	81.18	124.57	98.786	109.43	63.301	126.91	66.041	78.767	74.445	47.491	85.157	52.362
98.679	182.46	137.84	150.75	141.83	169.25	77.163	144.43	65.708	163.86	178.69	102.15	175.05	81.021
105.93	111.88	163.53	101.05	133.65	121.66	126.68	96.706	128.35	145.54	194.63	117.71	149.93	129.26
122.02	143.77	102.36	133.77	129.63	118.84	187	124.53	205.45	135.42	148.43	236.91	149.93	218.67
151.29	56.505	100.35	83.108	86.824	73.736	121.75	77.613	158.8	81.442	78.593	105.73	74.882	130.6
191.29	103.79	102.51	96.823	106.68	83.32	132.78	90.82	127.01	161.79	144.07	168.62	129.79	128.94
157.99	109.56	58.169	96.823	91.266	108.88	97.479	101.66	107.41	121.26	146.41	123.73	106.75	142.36
184.9	140.45	175.93	170.22	126.44	124.03	114.49	132.68	129.16	121.26	146.41	137.81	125.17	105.11
125.17	185.72	194.18	164.32	195.1	182.87	133.09	182.97	128.47	166.24	157.22	152.18	144.83	114.37
114.28	110.33	122.64	171.05	141.89	146.54	133.09	159.61	128.47	102.69	91.36	123.74	82.156	146.89
124.14	139.47	112.44	151.65	137.83	142.03	137.61	144.94	135.15	151.64	117.42	96.462	168.07	146.89
86.97	109.37	76.913	98.378	89.724	106.1	175.25	98.725	158.8	120.18	128.59	128.82	114.55	122.26
120.97	77.359	93.393	78.903	107.84	93.9	90.396	88.351	101.43	100.73	111.12	83.931	105.71	91.667
89.678	55.853	52.294	82.575	62.869	74.433	77.783	65.393	100.82	37.178	23.908	73.071	35.595	73.495
167.35	131.89	181.18	121.29	159.43	142.87	72.352	129.16	87.488	87.208	97.868	92.137	122.82	82.138
61.325	92.02	71.222	79.268	59.792	63.457	98.41	62.549	122.67	87.208	78.199	88.181	91.979	113.3
114.22	125.94	75.012	91.629	68.883	92.778	131.28	77.194	163.53	115.4	121.7	135.8	109.42	130.28
93.315	125.74	109.92	85.564	95.248	99.397	101.8	81.208	122.04	96.358	117.29	122.05	107.23	127.05
59.265	53.167	29.198	49.508	41.468	46.312	70.564	54.823	107.99	48.381	40.908	59.818	54.597	142.43
48.574	58.613	28.056	29.551	27.236	42.094	36.982	22.734	36.865	72.473	86.277	56.004	79.901	88.446
48.678	64.185	45.332	34.923	55.518	65.486	38.864	43.484	42.939	64.104	93.454	56.004	75.142	63.255
33.093	51.614	57.174	113.82	90.441	92.116	49.709	100.46	39.924	25.135	26.351	19.62	20.402	26.101
32.138	19.886	38.256	41.442	23.204	29.42	31.621	38.702	38.639	25.286	13.161	26.995	24.674	42.037
80.999	51.272	83.569	91.538	91.307	86.155	98.121	90.503	90.805	47.409	62.177	63.414	66.644	90.429
136.49	123.06	104.37	110.27	116.24	155.9	122.03	111.95	115.56	120.23	117.79	117.81	140.86	131.63
136.49	121.28	61.383	81.166	55.776	75.24	170.09	83.676	195.49	142.85	129.03	122.88	132.99	144.69
77.708	72.826	90.119	61.671	76.822	75.585	68.717	61.241	65.896	66.088	58.216	108.4	53.323	147.41
79.65	115.59	118.71	83.776	125.94	118.84	112.73	90.275	117.61	125.58	125.54	117.01	134.01	137.83
55.264	85.478	107.65	103.94	106.69	114.63	115.59	87.02	123.98	66.933	73.793	86.853	88.727	98.205
108.03	158.57	153.77	164.74	143.04	150.14	126.52	153.76	112.58	169.24	143.87	169.53	141.23	126.83
124.84	110.69	98.428	127.79	114.04	105.69	125.68	119.17	117.13	112.6	86.15	169.53	125.17	175.72
67.654	65.667	85.473	92.65	79.828	86.107	57.015	83.894	61.416	96.605	86.15	69.904	121.5	83.631
74.676	99.388	138.53	114.21	132.9	102.47	89.258	106.23	91.361	98.699	123.43	82.339	126.33	113.7
82.288	78.858	113.08	103.13	97.708	98.455	137.67	90.228	143	75.401	103.26	85.783	87.271	189.86
90.134	137.11	116.22	115.15	108.31	119.85	159.18	97.167	179.83	137.17	130.02	151.21	107.66	209.09
117.58	139.77	90.502	102.84	108.31	129.05	159.09	97.167	153.86	145.22	134.76	183.88	148.09	157.78
117.58	112.61	134.96	93.996	143.2	140.72	109.89	102.84	103.56	118.46	134.21	167.49	144.55	156.53
141.34	122.21	174.54	115.84	169.11	135.12	94.464	127.65	106.86	124.67	162.78	115.16	134.5	81.385
141.34	182.69	141.53	174.97	139.65	140.28	132.6	152.09	123.15	176.08	173.88	199.84	160.12	185.22
92.83	135.41	127.44	124.87	131.53	148.27	146.08	122.94	154.01	157.08	141.56	130.93	147.21	142.69
138.98	126.42	92.322	102.3	90.604	91.875	108.63	100.36	150.86	127.18	117.5	127.34	95.154	131.95
128.46	126.42	131.8	130.6	156.21	151.93	138.61	140.56	124.77	91.643	98.526	106.36	84.565	142.71
126.76	158.26	130.19	171.81	152.42	164.26	127.56	150.82	132.89	144.41	169.93	167.18	137.32	123.41
111.71	139.63	130.79	143.31	145.97	153.93	143.44	149.74	139.97	95.233	103.59	109.52	131.9	115.59
58.649	45.333	74.345	62.843	64.184	60.522	75.086	44.307	62.246	52.13	65.031	70.527	73.999	71.942
88.943	66.089	106.23	98	73.934	86.469	81.501	86.147	76.63	86.142	88.864	64.553	138.54	69.654
173.89	177.03	154.83	146.67	171.82	151.05	189.57	137.24	205	114.69	101.04	127.25	104.55	115.69
64.658	111.65	151.72	85.351	152.69	127.56	133.39	102.37	120.17	71.407	80.44	80.108	62.158	118.8
72.497	42.056	52.586	77.697	68.507	70.384	55.263	85.162	48.122	53.717	43.065	63.265	51.509	91.912
140.5	158.82	168.42	144.12	152.07	122.89	145.5	139.38	144.06	154.04	152.62	201.3	141.24	187.8
193.36	162.42	161.78	144.12	134.17	156.46	183.64	139.38	173.55	154.04	168.4	160.07	157.15	176.46
128.62	107.36	130.65	131.03	139.92	122.66	159.02	146.01	168.56	123.4	134.66	137.4	144.11	127.03
186.45	93.471	110.35	95.748	101.48	93.782	79.188	88.674	80.902	118.71	112.18	142.94	127.26	148.97
186.45	161.03	227.74	194.98	216.48	190.59	86.291	150.74	85.154	141.86	145	158.5	133.12	160.15
218.16	188.91	231.88	155.03	185.6	171.77	134.65	132.9	146.14	195.09	239.51	185.22	214.64	182.03
218.16	100.3	113.05	153.37	117.84	156.97	139.28	125.83	139.4	43.805	62.96	164.45	68.938	232.07
126.68	74.758	88.805	86.933	69.876	70.082	74.866	78.017	81.342	81.246	77.085	82.227	68.938	105.07
103.03	82.105	69.327	91.408	79.46	91.123	66.654	84.764	70.063	80.865	89.549	78.683	92.243	90.442
103.03	81.401	142.39	110.4	128.46	91.427	56.886	103.73	59.887	111.53	109.09	92.61	116.24	106.93
114.23	104.55	118.31	116.38	100.63	91.427	150.78	104.83	152.26	123.52	100.25	116	106.42	93.314
116.62	171.99	197.75	131	167.48	150.84	182.22	118.45	211.6	189.36	167.56	146.85	186.65	174.08
224.71	170.87	220.99	167.44	209.05	174.14	203.32	153.35	199.26	164.64	173.68	168.57	155.34	196.44
182.43	173.23	169.41	169.81	212.61	209.05	220.7	180.47	224.98	164.64	148.49	191.37	147.23	217.98
123.46	118.53	64.284	112.41	70.414	78.845	123.3	89.309	137.8	181.66	183.04	107.32	169.78	141.82
166.73	95.842	140.52	141.83	126.26	125.97	132.92	139.5	121.88	116.91	103.17	104.76	132.55	109.98
86.822	105.37	101.02	98.945	105.41	84.062	122.82	85.471	111.57	88.571	85.111	95.239	81.881	105.43
90.766	82.238	78.333	82.803	85.529	79.924	105.58	85.471	110.3	88.571	63.845	124.29	74.363	110.91
90.691	82.238	50.519	90.647	52.604	79.924	96.587	90.308	106.6	100.07	76.871	102.57	98.095	126.74
150.65	171.84	244.01	135.19	194.71	178.97	176.33	135.12	141.06	163.09	198.22	185.73	186.27	175.95
122.73	161.33	108.81	138.56	123.42	132.8	149.16	135.64	134.38	163.55	169.11	180.42	146.51	205.89
171.78	125.85	132.91	138.56	119.83	112.62	187.27	135.64	165.22	149.57	134.72	159.15	117.88	135.39
98.275	108.6	105.55	124.69	122.73	143.54	77.395	141.32	73.337	128.74	91.328	102.54	103.3	87.085
87.236	60.384	49.449	92.023	74.966	90.348	71.933	85.138	73.337	93.029	45.033	84.851	81.212	89.233
64.108	56.558	51.825	49.515	49.594	54.412	54.098	52.247	64.827	61.727	54.838	67.319	60.34	62.937
94.226	62.634	71.38	52.963	58.728	49.028	110.03	45.211	111.34	81.138	50.783	84.366	61.889	105.86
95.16	55.253	31.499	50.634	44.034	48.449	48.342	43.596	72.188	82.007	67.404	55.576	102.99	67.565
53.305	55.253	26.706	36.226	38.467	40.464	51.132	35.319	45.325	60.738	69.23	53.695	90.419	116.14
57.133	94.409	39.2	60.786	54.88	68.486	68.825	51.047	55.554	116.66	96.993	106.11	102.09	120.24
61.267	68.289	42.589	42.742	41.302	45.972	57.481	36.632	67.952	73.525	72.069	62.068	77.939	82.741
32.189	74.86	26.87	41.774	40.45	50.814	43.878	37.235	46.9	103.54	77.863	64.403	96.153	86.211
24.505	49.738	31.055	39.673	43.292	42.048	38.638	35.757	37.007	89.982	53.561	46.73	56.928	64.365
27.466	35.57	36.17	41.416	50.086	47.722	28.414	48.954	26.002	17.419	19.364	21.366	24.897	19.32
29.642	36.907	32.251	41.248	34.013	43.097	26.194	44.12	20.629	18.369	19.364	26.385	24.897	47.518
42.545	45.896	31.383	55.864	46.02	53.37	32.567	58.962	26.498	42.706	24.212	22.923	39.82	35.062
66.58	101.29	45.586	102.63	49.356	68.754	72.098	86.032	55.635	105.48	68.702	107.74	94.779	108.41
73.319	103.77	45.586	104.84	58.434	77.446	86.42	81.884	96.329	194.39	120.67	142.08	140.57	101.79
66.02	89.829	58.719	101.49	75.811	78.561	70.63	83.046	78.945	142.97	131.24	76.08	149.04	74.135
93.425	89.244	67.104	77.015	75.258	88.893	34.619	72.789	33.627	122.51	131.24	75.854	149.04	82.136
111.85	62.982	91.014	103.71	108.95	101.29	75.307	90.97	71.834	81.692	80.727	54.107	75.719	56.853
67.632	54.329	78.728	102.75	96.785	87.863	66.777	101.51	50.733	58.612	43.155	54.107	64.474	47.021
52.019	48.724	58.304	69.825	81.292	84.052	60.419	77.278	50.291	58.612	78.599	53.028	74.092	72.605
112.21	140.78	74.671	96.576	91.176	91.207	127.01	92.388	121.29	140.12	132.82	153.03	134.6	176.53
94.081	173.68	135.42	135.4	149.1	153.32	135.33	145.32	133.3	216.45	163.52	171.01	175.88	188.36
73.468	62.246	60.975	65.932	49.681	64.873	91.286	64.629	84.492	93.867	71.255	118.71	104.39	98.219
81.846	89.496	89.145	99.239	103.06	86.893	108.32	81.73	138.19	93.867	91.993	90.074	86.251	113.51
80.742	143.3	85.629	132.33	114.04	115.38	174.62	144.51	206.7	111.56	98.545	139.78	101.55	173.3
56.208	51.587	64.919	91.179	74.08	76.032	87.526	74.85	92.777	54.995	54.05	80.327	65.018	123.77
66.124	46.138	71.513	74.5	77.466	80.565	64.419	76.091	63.764	49.365	65.479	43.893	64.551	82.111
64.695	57.453	61.206	69.542	66.586	63.577	77.085	74.651	98.348	74.4	73.535	88.394	70.031	95.757
64.695	119.49	119.37	88.847	100.79	95.914	103.97	84.842	124.39	107.88	119.43	138.94	103.51	181.79
84.548	71.695	59.419	69.704	73.977	70.75	74.62	69.947	105.11	70.158	81.136	57.339	94.739	98.634
51.253	65.112	69.205	69.704	78.938	88.393	59.435	69.947	47.448	33.581	33.001	46.202	31.778	57.99
48.348	35.373	64.101	59.104	53.743	61.471	30.432	58.083	25.455	21.815	23.267	23.854	22.788	34.93
67.342	59.982	43.917	69.588	52.458	55.517	47.686	69.068	42.788	50.215	51.344	38.365	54.045	61.884
55.509	59.982	45.367	78.897	52.458	55.517	75.386	69.068	61.775	71.906	48.526	119.73	54.045	121.68
128.79	163.5	147.08	176.19	158.07	189.93	126.94	157.81	102.72	190.2	163.44	158.61	179.72	152.27
122.15	161.44	122.03	131.66	123.51	126.16	129.95	113.48	142.15	160.64	162.77	171.51	179.18	161.74
88.032	113.89	104.23	112.44	123.51	110.49	95.925	113.48	112.93	104.13	105.18	120.48	108.81	146.76
75.641	104.32	89.568	91.423	85.909	96.082	154.41	101.71	141.89	90.036	102.2	111.98	100.14	114.14
75.641	49.628	63.617	83.276	68.84	73.013	89.071	84.843	89.51	64.033	75.805	39.705	79.925	51.685
67.875	65.723	63.617	83.276	68.84	73.013	75.98	84.843	75.291	51.566	54.751	42.947	63.625	41.616
67.875	124.84	114.01	79.312	118.9	98.414	110.77	100.69	89.33	136.22	156.9	106.68	155.58	92.651
122.7	150.67	150.79	185.36	186.45	223.26	105.35	195.86	102.06	149.77	143.47	109.75	150.12	126.53
57.122	87.682	119.33	99.091	121.85	115.34	72.848	101.58	66.6	85.285	78.972	81.422	71.717	67.706
92.249	108.23	158.92	154.31	141.39	120.31	107.04	157.84	106.61	103.99	75.204	103.2	80.022	79.788
53.309	58.648	71.904	150.38	90.72	116.46	80.561	146.39	75.978	36.236	33.921	63.779	57.048	56.376
31.582	66.973	71.904	123.69	90.72	99.813	76.036	117.25	63.709	72.15	61.192	63.779	67.744	58.386
64.523	86.292	85.157	79.016	88.881	95.637	93.304	89.53	92.396	76.29	73.833	79.915	76.949	81.874
53.327	137.13	80.346	85.589	100.91	123.09	71.552	98.386	64.043	141.05	166.52	155.61	153.99	180.79
40.201	116.46	74.093	77.514	100.45	111.81	76.147	87.294	67.505	155.49	166.52	97.016	186.76	121.75
40.118	75.74	75.872	69.009	72.809	71.076	45.881	51.858	32.191	95.403	90.867	55.506	92.801	79.736
56.87	66.211	62	69.009	66.005	64.279	51.026	60.499	57.307	73.335	72.085	68.578	88.456	145.8
63.695	134.18	70.264	77.143	69.677	85.002	114.07	80.57	104.78	153.1	181.46	134.48	175.25	144.46
118.05	134.18	141.6	94.882	147.24	140.55	58.051	96.711	66.771	153.1	194.77	83.842	166.62	94.073
114.72	153.61	143.42	106.33	148.14	140.62	114.28	115.34	118.37	124.88	123.32	165.32	119.96	136.05
47.199	66.53	32.226	73.479	48.284	57.02	47.003	72.338	47.555	77.23	62.283	96.983	72.13	90.058
44.06	53.292	66.429	66.367	59.255	57.985	66.763	68.878	77.763	84.091	81.799	62.882	64.402	111.76
105.47	90.881	66.429	63.028	69.832	61.637	93.509	70.369	124.22	110.29	95.619	162.52	83.269	183.99
90.888	100.33	79.799	118.44	92.416	105.35	159.62	118.8	161.63	95.008	97.224	103.27	114.33	119.38
106.49	84.929	68.252	102.22	92.416	103.54	162.71	118.8	168.91	81.363	107.51	113.73	96.108	113.04
112	57.972	81.5	90.563	69.445	67.242	99.752	87.607	120.57	57.046	44.169	106.25	56.9	98.441
49.829	91.634	98.434	96.154	112.86	107.84	75.707	102.53	79.677	111.58	82.967	81.787	114.38	97.203
70.831	79.58	91.829	64.813	91.772	79.419	93.735	67.84	98.021	71.323	114.52	43.669	116.12	50.495
70.831	93.716	87.582	106.22	83.342	87.999	93.735	108.12	101.28	86.557	78.426	93.337	75.107	86.323
62.603	106.84	78.063	96.184	90.902	113.38	119.93	94.871	154.77	133.03	149.98	141.67	124.62	195.54
100.54	191.67	142.76	98.551	138.35	127.21	119.93	94.871	106.99	204.94	173.32	190.26	198.99	165.46
121.92	154.3	151.55	112.74	139.03	132.66	113.08	111.39	111.96	151.1	134.79	235.24	141.11	251.76
121.53	123.5	63.72	104.32	74.472	89.681	162.18	97.544	159.86	153	156.73	191.98	175.05	192.26
136.55	204.64	235.48	209.64	210.57	193.42	268.87	218.23	262.63	175.26	185.23	224.97	160.05	240.61
141.13	187.83	182.01	186.31	205.35	189.43	258.43	188.34	240.98	191.93	198.31	177.05	155.51	148.65
147.52	216.29	181.92	186.31	211.93	189.63	203.65	186.12	185.59	191.93	187.53	171.01	226.51	128.5
127.3	160.85	212.11	198.83	210.6	175.18	163.61	188.24	158.1	128.99	145.61	121.85	101.41	105.16
70.572	53.313	78.091	80.853	81.078	76.8	67.388	93.014	83.349	42.373	56.766	47	38.792	54.863
94.336	99.645	89.552	78.181	77.924	89.188	208.06	90.585	197.95	82.298	86.048	116.26	119.63	141.34
79.086	91.274	76.963	117.61	84.117	92.012	83.31	102.93	83.894	127.38	91.367	79.676	120.84	60.202
90.998	88.258	74.946	90.516	75.415	80.739	83.31	77.462	89.498	110.15	114.31	73.125	99.389	85.094
53.834	49.817	46.137	58.232	43.483	58.752	84.636	62.082	81.102	74.212	48.196	47.382	57.48	69.435
47.863	56.762	45.791	55.144	43.483	59.21	52.191	52.923	44.427	50.564	54.56	47.717	50.746	46.504
28.805	46.44	36.043	48.673	42.942	48.472	29.857	41.298	27.3	47.68	43.177	30.903	38.314	46.084
15.588	42.833	32.897	33.589	34.998	41.398	28.978	33.479	20.748	44.227	60.387	18.685	73.437	20.002
27.443	50.418	39.437	59.745	43.118	43.229	38.742	50.948	34.76	41.996	45.49	32.391	57.725	54.187
30.937	41.513	40.335	53.387	44.965	44.159	41.918	51.195	39.015	32.842	30.001	28.674	34.255	54.187
18.263	24.736	28.976	37.262	36.491	38.894	25.059	36.875	21.108	18.923	14.39	24.432	24.579	28.836
9.8852	34.667	27.408	43.834	43.71	49.858	39.208	44.103	34.772	26.02	14.831	23.399	32.009	29.691
13.527	28.583	28.355	38.951	38.809	38.529	25.505	35.693	21.486	21.499	26.215	32.603	42.414	29.691
25.53	32.919	35.763	46.198	43.085	42.095	23.862	43.217	29.385	25.617	27.289	27.484	30.284	43.755
19.091	36.396	46.084	38.841	49.691	46.455	34.074	40.953	31.303	30.264	28.78	27.484	28.664	35.713
27.074	31.038	33.399	36.017	43.261	43.714	27.083	39.508	25.164	19.656	17.661	30.34	19.331	34.567
29.733	31.038	33.399	42.077	43.261	43.714	27.835	47.821	25.164	19.822	17.661	37.413	17.467	16.809
17.538	9.0869	11.342	20.155	9.8999	12.399	10.85	18.05	12.415	7.3689	6.7151	6.907	10.677	7.0572
16.538	12.955	16.913	29.609	17.973	17.871	17.539	18.316	14.343	9.1505	10.613	12.145	11.462	13.387
41.334	14.385	32.117	41.148	22.657	33.65	25.952	33.508	17.927	13.008	9.136	14.351	27.278	23.5
59.254	86.998	42.8	62.999	55.015	61.676	79.383	75.632	75.516	114.68	91.31	65.812	97.261	77.139
63.061	59.204	44.023	56.885	49.448	57.397	85.24	64.321	107.08	62.703	66.263	43.159	58.502	82.888
32.299	35.454	33.404	53.26	43.608	52.965	36.299	52.615	32.742	40.257	23.713	30.936	46.992	20.87
69.634	52.342	46.692	67.115	52.94	52.965	52.878	60.653	73.702	43.256	24.989	68.874	65.262	78.828
44.014	58.148	58.287	64.794	56.391	60.232	40.684	70.929	46.648	91.506	67.997	72.838	97.511	78.828
50.166	51.948	48.137	61.548	55.009	53.284	55.394	70.943	66.327	68.281	52.372	59.341	57.266	78.834
40.002	29.733	20.614	49.438	31.843	35.317	49.719	35.209	44.399	33.399	15.593	49.858	28.902	66.271
22.961	26.628	20.715	41.613	31.076	31.926	28.72	34.447	26.021	15.918	15.593	25.402	25.112	22.413
19.628	37.382	33.569	40.148	27.769	34.232	37.98	29.371	30.298	27.452	32.286	30.035	39.854	24.802
33.071	25.908	22.976	35.236	30.162	32.596	20.071	33.256	23.988	26.613	24.046	16.661	47.236	22.565
34.361	26.43	21.701	24.934	21.654	25.792	22.839	26.682	29.409	18.339	16.151	29.726	18.043	39.233
29.112	31.962	25.147	38.874	30.416	35.999	27.639	32.762	29.409	23.147	22.518	38.435	19.404	41.164
26.23	24.428	16.897	27.416	20.754	25.404	41.259	23.42	54.555	14.586	14.973	21.179	20.276	94.956
23.069	19.346	18.09	24.341	21.633	25.404	15.677	23.42	18.977	17.761	14.681	23.277	20.649	17.676
28.688	20.02	23.248	29.481	26.109	26.788	22.819	36.823	22.083	13.229	10.631	15.22	10.014	42.294
21.76	34.457	27.486	53.904	40.366	43.667	51.929	41.216	49.24	20.041	19.407	38.34	19.452	29.705
34.493	23.172	26.519	47.395	34.206	35.553	32.054	46.415	31.56	12.56	15.352	15.086	13.593	40.581
21.957	19.33	20.334	35.539	27.993	28.998	24.668	38.334	23.411	12.497	8.8039	24.667	16.54	23.174
20.456	23.108	22.207	39.271	32.047	30.454	31.143	42.824	23.411	13.934	12.462	27.716	17.859	30.53
17.169	81.562	84.408	158.12	115.07	122.49	92.77	174.73	96.109	47.2	34.583	43.776	47.051	59.223
35.205	62.42	34.208	37.912	41.796	41.005	58.917	40.381	90.965	67.379	60.476	72.876	82.009	138.23
31.148	52.936	21.221	39.372	31.641	39.839	77.431	35.369	116	37.075	24.448	90.836	26.025	152.93
19.045	37.148	22.253	38.243	33.467	36.477	33.014	32.341	52.147	18.359	14.274	35.895	14.786	62.468
25.722	42.267	39.814	40.914	55.707	45.787	33.014	48.807	41.072	25.114	24.836	42.629	26.675	50.385
30.934	30.037	21.727	36.193	29.525	29.649	33.071	33.54	32.594	25.114	18.598	22.455	23.288	28.566
18.822	34.317	21.459	35.646	31.999	33.945	29.042	38.317	34.689	39.331	24.837	44.16	34.806	62.217
17.884	23.824	19.248	24.758	25.751	29.908	27.6	29.705	25.066	19.002	18.065	22.054	24.355	37.582
19.411	28.023	36.634	57.423	49.357	52.446	24.922	64.687	26.337	16.424	18.065	16.686	25.994	37.582
29.45	44.538	43.4	66.907	57.221	57.308	43.941	64.687	40.761	20.524	20.955	34.518	14.701	24.826
28.258	32.152	22.691	41.89	29.031	34.629	45.689	40.8	47.83	23.276	15.542	49.343	14.486	60.866
75.696	82.352	60.236	116.05	78.546	88.347	82.814	111.46	80.85	52.516	35.667	76.916	42.217	99.656
45.219	62.076	21.813	74.642	31.842	45.673	67.116	47.173	66.374	84.346	58.806	88.896	69.797	68.555
54.956	107.21	53.044	90.351	80.735	94.289	63.814	106.82	62.675	162.38	147.4	82.194	169.94	46.175
78.553	118.5	81.192	133.25	104.3	118.04	96.561	121.11	70.91	140.35	108.79	79.115	116.06	53.641
54.582	78.815	44.422	63.768	51.362	58.653	55.684	69.467	70.145	109.22	112.25	79.115	119.38	63.52
74.725	92.262	62.494	87.354	63.801	71.398	74.536	66.382	84.775	125.64	112.25	114.4	119.38	93.865
65.445	56.375	62.494	91.483	58.905	75.434	79.905	88.98	75.298	51.115	48.507	51.977	50.121	73.569
95.75	76.728	67.246	74.025	65.621	82.053	60.776	76.856	68.816	97.849	83.635	66.385	93.416	68.991
130.87	116.22	97.348	111	92.554	96.058	141.89	108.55	152.66	136.55	147.51	101.34	156.59	91.218
57.86	83.978	51.412	79.226	57.783	70.242	86.59	77.295	88.594	74.304	77.093	91.711	61.899	80.004
46.304	98.936	34.783	63.421	47.758	60.149	72.379	62.187	82.104	129.92	89.958	147.18	115.61	139.26
46.284	72.045	38.381	39.656	45.143	39.314	52.744	40.404	35.797	55.038	58.796	70.727	56.997	56.175
54.576	65.197	52.278	75.021	72.321	79.298	54.417	79.075	49.386	44.637	34.256	44.149	27.896	28.92
31.939	42.252	38.297	69.114	52.579	54.941	59.943	64.648	50.056	20.424	15.396	44.149	18.391	49.088
54.744	46.804	33.039	72.159	48.346	52.535	90.27	64.455	92.487	20.424	15.584	78.986	22.491	96.894
46.903	71.443	75.786	83.015	68.814	79.139	59.87	95.668	53.148	79.405	63.134	69.134	51.182	72.14
69.856	78.581	68.396	99.394	86.935	97.062	62.564	108.31	42.28	74.039	94.383	56.211	92.513	45.17
106.91	88.008	84.454	136.69	102.67	123.52	143.28	129.79	155.12	94.508	85.317	81.026	104.9	105.15
70.271	107.07	85.619	89.691	96.249	100.14	78.706	85.372	98.51	145.31	143.19	124.19	137.99	106.18
73.252	154.97	110.79	97.967	110.14	119.32	74.392	117.8	84.057	177.93	161.32	127.03	158.38	122.78
109.53	143.58	122.95	118.34	129.54	121.97	105.84	108.22	84.057	133.97	112.79	127.03	119.41	114.45
102.61	43.455	57.923	99.474	64.779	62.612	112.3	80.776	123.07	52.542	42.123	63.747	54.233	70.111
99.919	95.899	95.498	159.33	109.6	113.44	162.25	157.04	137.13	80.172	46.323	118.74	61.764	101.05
125.1	173.43	95.697	124.9	112.43	117.61	163.14	136.47	162.66	212.66	144.58	163.3	169.33	136.55
108.94	102.5	96.806	123.56	113.58	110.6	190.92	135.13	208.84	80.504	72.394	102.79	70.098	136.76
110.01	102.5	190.03	114.32	172.11	129.71	92.878	126.65	72.314	80.504	72.394	78.129	78.914	76.448
62.984	50.429	69.037	90.478	63.702	66.75	100.65	92.803	94.232	61.723	60.465	63.596	83.251	71.422
127.53	87.965	82.741	66.864	78.236	81.599	73.887	75.088	66.615	103.65	114.84	72.718	129.37	102.11
59.87	77.453	116.89	53.918	89.783	81.599	73.887	70.149	83.87	71.136	103.49	72.718	123.34	102.11
98.184	148.5	236.32	153.89	212.79	192.91	106.48	173.77	115.86	123.3	148.83	95.396	126.36	93.728
103.76	105.44	84.375	101.31	101.37	93.05	103.37	95.916	103.01	63.612	76.578	75.211	92.476	80.568
143.75	97.394	118.03	87.317	114.73	102.86	77.773	95.916	101.99	62.102	100.89	108.3	98.967	166.12
105.03	98.018	135.1	91.036	104.85	92.954	117.75	80.619	83.475	104.09	106.65	111.21	98.967	130.4
116.27	97.005	66.774	89.057	64.26	69.663	125.42	80.223	148.04	121.83	88.507	177.44	93.004	203.37
122.59	127.72	95.623	89.057	109.54	97.767	125.42	92.996	122.73	134.15	136.93	126.09	127.06	109.87
135.86	102.12	167.08	152.16	160.52	136.82	100.26	179.31	107.87	75.745	93.135	95.549	98.708	104.04
154.13	110.46	94.462	152.16	122.05	136.82	100.26	179.31	107.87	154.23	152.7	136.17	149.34	119.3
131.48	99.589	136.06	134.12	115.57	116.38	87.402	120.87	79.843	113.72	121.01	98.634	130.65	119.3
150.34	153.35	210.29	194.1	187.7	173.37	171.83	195.33	169.46	99.123	101.39	164.61	68.922	144.47
172.57	155.06	217.84	133.25	183.63	156.7	196.99	156.07	223.94	135.04	113.63	240.01	119.22	239.73
73.124	79.007	98.215	100.55	79.051	87.168	130.69	103.49	134.41	87.677	94.633	80.812	96.668	94.914
126.8	84.794	99.881	65.36	97.083	87.168	105.17	72.093	107.45	120.91	136.85	80.536	123.35	86.85
129.99	98.995	123.02	95.98	103.01	92.613	128.69	102.49	130.37	76.586	94.678	74.676	103.82	99.378
83.091	78.826	88.053	73.43	98.776	76.778	72.738	78.989	64.443	82.504	81.051	58.622	103.82	77.349
77.323	78.826	89.632	72.757	93.086	87.982	54.803	71.181	58.403	82.504	81.051	58.751	103.04	96.712
57.725	71.821	105.7	68.261	94.315	78.701	47.847	60.352	46.868	65.683	87.764	36.501	81.96	52.279
59.991	70.811	100.42	69.908	83.333	78.303	62.408	82.288	68.924	58.628	73.305	74.651	68.649	102.41
73.842	100.1	147.95	87.121	146.01	113.73	58.672	88.527	60.561	148.34	142.51	111.95	187.89	70.698
182.06	84.587	91.333	67.311	85.625	84.244	85.161	74.943	87.73	145.87	143.24	88.486	118.93	70.698
94.065	143.69	123.67	97.678	119.34	92.922	175.52	88.41	163.35	155.11	147.65	140.33	124.11	149.32
81.679	100.47	62.463	101.91	85.583	84.225	152.85	108.92	135.4	91.753	106.68	96.394	82.117	86.614
118.25	96.652	103.97	105.91	91.294	98.964	94.803	103.4	92.322	95.106	117	95.34	108.76	84.293
101.98	65.488	65.254	113.9	90.025	94.041	81.659	103.4	79.976	58.463	56.781	55.213	71.568	48.836
124.27	97.595	150.19	140.42	145.99	149.42	110.8	133.85	83.339	82.821	96.631	90.525	80.98	104.36
123.04	94.419	127.52	72.14	101.92	98.13	103.85	69.406	97.877	77.111	123.18	72.22	91.515	107.89
108.89	108.39	72.966	99.702	82.352	121.28	156.81	89.159	192.49	85.49	90.92	209.75	96.122	230.58
106.76	79.138	109.15	116.92	113.15	114.28	112.46	137.62	125.59	63.24	62.126	75.53	52.042	101.29
134.03	78.138	100.41	108.4	100.33	118.06	123.53	111.54	125.59	73.375	60.133	101.01	72.862	101.29
113.78	130.71	89.713	78.78	90.429	75.881	121.56	88.307	146.18	128.85	105.01	121.96	142.77	118.11
111.17	169.05	137.5	110.37	136.6	122.78	71.705	111.34	68.861	188.76	153.17	140.62	170.85	153.84
107.9	126.36	158.29	170.37	173.29	177.34	131.87	162.7	103.93	91.521	120.6	132.27	87.681	106.19
90.915	62.685	122.66	147.74	114.55	90.09	116.73	148.62	114.11	57.069	66.161	39.327	74.64	58.156
78.864	71.66	92.285	72.604	75.138	71.362	79.736	82.501	102.99	59.659	46.802	119.08	43.627	113.59
114.67	117.5	140.2	130.27	141	123.23	161.58	130.23	169.98	133.04	114.53	141.29	104.68	165.99
114.67	185	182.09	140.13	167.19	159.92	184.75	134.69	174.35	136.6	142.49	269.71	154.78	259.11
100.22	194.76	182.09	130.21	167.19	159.92	126.53	134.69	108.83	206.64	206.73	215.6	186.01	177.63
155.39	173.31	208.18	200.98	197.71	184.41	164.22	180.57	157.35	144.84	103.24	146.45	110.5	144.13
149.91	160.4	173.13	181.97	168.67	154.54	198.85	145.47	216.55	146.85	117.75	146.45	103.07	152.96
238.04	120.92	143.26	99.873	102.9	115.55	149.26	103.55	168.43	166.08	201.3	141.59	173.55	130.04
120.4	95.755	93.915	77.463	88.389	82.898	97.787	80.85	93.162	127.35	132.05	95.99	106.86	91.128
96.719	107.25	109.48	79.157	92.35	91.495	123.07	80.85	112.77	88.012	93.706	95.99	99.423	123.89
93.743	117.75	151.13	88.339	118.21	111.7	114.32	104.28	99.978	82.807	95.213	94.698	103.72	109.02
100.7	88.478	98.28	96.608	103.39	105.91	63.107	94.158	84.899	105.39	142.72	77.566	140.86	99.793
111.74	148.37	195.32	137.55	195.41	156.49	129.12	131.94	117.11	168.66	174.83	139.44	162.29	113.63
146.51	119.36	205.11	132.53	204.9	175.53	118.85	131.94	155.13	110.58	137.84	104.87	117.59	113.63
146.51	115.27	113.27	96.241	117.72	93.046	126.9	81.939	159.97	126	129.98	177.24	114.58	186.81
158.94	135.84	117.57	108.46	129.29	118.36	141.94	118.1	144.51	124.69	137.34	154.57	104.32	135.53
95.722	80.885	76.243	70.497	75.426	76.13	139.1	81.041	144.51	78.45	71.363	121.19	82.113	120.32
142.75	121.6	85.809	111.04	93.552	109.16	117.95	107.73	119.58	163.58	165.53	149.99	153.35	143.92
112.16	129.29	144.2	129.82	124.98	120.88	117.08	116.43	113.1	98.542	125.68	110.21	105.49	112.92
118.51	156.72	123.96	164.13	175.56	147.05	145.14	161.1	137.45	218.28	184.3	156.36	196.14	149.25
124.89	133.87	148.05	121.79	125.02	138.52	116.54	112.51	113.96	123.29	140.36	141.65	135.05	157.7
167.34	123.57	225.44	150.38	141.91	167.17	111.67	134.35	114.91	130.01	172.09	122.82	165.47	139.77
144.84	99.578	109.68	115.09	105.5	99.633	123.56	101.76	137.75	86.493	118.3	92.326	104.43	139.77
128.4	99.578	142.1	81.232	108.05	80.526	133.73	86.246	142.48	110.22	116.82	104.7	86.015	150.67
88.794	152.42	143.14	131.1	143.67	139.01	122.9	118.86	102.08	145.16	149.21	161.16	147.31	123.55
165.74	167.94	198.22	149.17	184.34	143.23	139.47	130.52	131.82	153.82	158.72	161.16	162.93	165.63
161.62	241.96	350.99	181.98	257.23	204.11	182.86	180.96	153.5	210.53	240.09	244.35	207.51	200.8
120.5	104.43	150.65	75.977	103.45	96.122	131.13	75.306	98.062	108.4	119.79	98.632	112.77	137.51
135.04	104.43	110.03	76	116.57	100.86	123.45	77.555	123.05	85.501	86.665	122.21	71.1	157.03
87.64	77.051	69.542	84.323	74.342	83.118	143.34	84.864	154.77	73.941	79.032	91.676	70.347	127.17
114.04	74.483	67.339	115.74	80.504	102.57	91.321	112.46	82.681	88.297	81.436	64.103	115.86	59.022
96.888	62.425	83.451	93.02	99.554	86.393	70.012	93.335	64.171	61.756	72.021	57.343	72.927	72.629
65.753	62.425	83.451	81.578	76.769	85.345	44.81	82.339	62.357	107.94	82.471	66.517	137.25	74.232
105.5	101.49	156.68	127.8	121.99	104.94	96.486	114.58	92.114	105.93	103.92	110.69	62.534	104.23
120.75	81.192	132.11	127.8	121.99	104.94	96.486	114.58	92.114	69.203	62.57	82.562	60.626	121.18
81.457	65.409	64.405	95.166	78.031	75.255	74.712	81.249	74.922	53.55	51.262	62.582	54.489	83.052
72.136	84.192	99.302	95.006	87.578	102.24	70.276	85.955	66.306	77.218	73.099	59.758	58.168	56.718
87.769	85.562	78.557	76.99	80.872	89.943	70.561	68.357	68.826	102.95	109.44	101.52	103.18	118.18
65.018	77.806	82.916	113.87	96.673	95.257	70.561	98.431	68.826	60.256	73.874	51.705	75.175	86.522
113.82	181.74	258.01	187.82	225.89	186.54	126.58	188.02	121.74	181.31	186.59	147.22	248.53	170.73
121.05	165.82	213.16	158.51	192.12	186.54	177.3	177.83	174.66	131.1	165.45	127.84	121.16	124.95
134.37	173	152.72	127.99	145.38	133.55	105.13	118.65	85.565	163.41	172.82	163.32	158.82	154.03
77.982	48.835	60.786	118.62	70.897	75.483	109.99	102.69	103.99	42.718	74.876	51.034	79.928	65.979
77.982	89.548	70.567	117.75	76.466	86.527	85.82	102.74	94.419	106.27	112.87	83.082	113.24	107.72
91.495	81.959	79.612	117.75	95.228	94.124	77.314	106.46	95.801	69.814	94.059	83.082	85.571	89.69
135.05	81.44	149.59	78.158	124.06	111.64	79.7	106.46	95.801	51.305	104.59	46.725	75.197	84.762
153.77	105.78	96.757	90.39	123.68	111.64	161.38	87.011	164.55	114.64	111.52	107.7	96.792	108.39
157.24	145.85	143.13	103.68	159.98	152.74	101.92	144.97	120.75	143.86	153.04	188.53	138.43	203.5
70.091	135.02	143.13	97.29	111.05	110.16	84.454	79.108	80.664	142.9	138.73	143.76	195.9	138.69
130.56	141.56	140.83	115.79	140.13	140.7	96.959	116.38	95.58	132.5	151.36	83.268	143.9	74.535
120.22	151.95	163.48	120.84	169.85	152.73	112.4	151.05	112.26	119.14	162.88	100	149.6	72.669
164.58	100.07	108.45	120.84	121.98	119.19	133.86	140.42	140.6	86.969	107.54	84.299	86.47	84.102
146.99	107.2	159.37	110.88	139.38	110.29	106.83	110.04	100	123.86	114.03	112.37	115.91	82.387
122.91	88.051	141.32	102.18	129.17	110.29	79.048	123.94	60.969	68.82	73.595	70.877	88.081	82.387
119.62	96.01	89.839	130.81	93.915	93.802	125.49	134.01	148.98	56.163	58.107	111.44	61.355	132.69
88.286	85.986	84.216	114.18	94.796	126.29	125.61	109.44	146.05	98.682	85.721	66.372	99.282	95.304
142.19	208.79	273	145.82	255.46	215.7	114.94	142.76	99.005	171.42	223.82	152	176.84	152.54
63.873	79.059	61.803	67.917	69.548	68.177	68.219	77.909	80.765	63.332	101	72.84	92.441	102.68
56.89	80.439	77.963	71.189	71.944	80.19	84.641	72.674	91.252	93.377	101	78.134	112.27	94.368
209.15	140.24	128.05	101.36	117.48	113.06	150.97	106.77	141.79	138.79	145.42	188.15	146.64	175.21
131.1	129.21	125.86	135.02	115.03	117.45	120.71	127.78	137.62	174.19	149.44	169.15	151.07	143.58
79.807	113.32	103.94	127.99	125.83	121.18	150.09	106.1	126.45	121.96	135.28	103.33	135.45	113.09
120.1	159.9	137.28	129.45	140.32	128.12	150.09	130.03	126.45	121.96	152.55	112.64	136.99	114.88
129.85	91.73	110.61	109.55	107.31	91.255	78.088	112.58	59.978	71.054	99.429	55.481	86.55	88.548
88.646	53.177	90.263	67.315	62.235	62.606	66.743	52.805	62.71	110.03	113.93	76.252	109.74	64.237
88	76.18	99.739	117.27	98.499	106.31	93.149	115.8	71.442	110.03	109.16	119.55	109.74	89.767
42.31	58.073	64.285	64.515	67.63	73.636	93.149	61.817	71.442	50.767	56.456	64.08	57.34	55.388
48.513	49.001	69.994	62.271	49.087	63.08	40.714	61.817	45.33	42.18	35.206	45.321	42.516	51.214
128.97	136.41	163.47	186.54	180.68	173.97	143.14	193.37	117.15	82.659	79.719	121.74	94.465	98.738
100.75	136.41	219.07	151.71	213.19	168.7	161.63	167.87	151.73	103.78	141.6	109.71	112.47	135.11
159.29	210.14	272.57	239.33	220.79	229.04	193	215.93	172.42	180.62	211.99	186.49	203.98	150.07
149.02	125.37	174.3	111.69	157.6	169.67	145.46	114.12	164.43	130.32	137.63	106.2	123.86	105.93
128.15	130.03	93.234	96.29	111.49	128.24	145.46	98.764	159.62	121.8	118.23	117.99	119.2	116.09
67.744	50.705	63.015	82.23	71.262	82.995	36.42	89.096	30.144	64.669	84.4	44.352	75.622	52.764
58.773	82.326	102.98	68.739	87.201	75.835	69.92	85.855	69.001	79.518	96.215	69.503	94.793	52.764
109.07	113.25	100.69	131.76	107.51	117.08	118.39	135.27	109.9	112.07	102.18	104.13	109.45	101.54
126.77	113.25	131.38	142.76	131.42	131.88	99.172	140.02	100.9	134.99	142.33	77.964	137.99	90.33
71.255	96.822	119.26	142.76	115.38	130.04	96.596	140.02	89.468	73.476	96.825	73.197	85.732	69.529
111.29	98.701	139.25	83.936	120.47	113.81	61.903	104.89	73.858	89.457	109.68	73.197	125.43	70
128.81	100.93	97.904	78.952	98.605	102.8	81.761	76.74	116.34	89.457	109.68	63.961	125.43	81.746
82.505	100.93	105.98	130.99	129.08	116.19	122.43	140.3	114.05	85.926	83.607	71.308	95.148	85.104
137.2	99.468	122.25	99.786	115.54	114.7	92.568	105.74	100.39	110.11	129.92	112.46	143.34	117.78
149.13	114.37	216.06	126.93	181.02	160.7	135.82	143	148.85	72.296	113.66	110.71	65.712	143.74
109.17	162.85	160.05	113.13	172.54	131.61	172.27	124.23	160.98	182.9	192.59	133.71	162.68	149.66
180.2	335.11	346.13	357.72	376.52	365.69	330.09	385.04	310.53	232.79	255.78	257.63	208.71	239.62
198.63	164.42	195.57	152.32	173.47	174.93	161.73	170.86	160.01	190.16	189.46	180.24	177.4	197.44
88.871	99.944	130.29	164.66	132.18	128.9	181.97	170.86	173.7	87.679	83.256	96.999	100.73	112.4
75.14	126.1	153.22	105.73	132.89	127.24	121.86	140.52	123.64	92.589	125.07	107.12	113.67	120.48
71.409	72.258	153.22	82.214	132.89	105.34	112.21	86.433	116.16	66.159	77.074	70.508	70.107	85.851
73.45	46.783	56.831	69.944	78.079	77.07	96.1	84.499	98.474	48.595	32.49	69.165	33.34	79.212
64.083	106.11	90.738	105.37	101.76	103.4	114.72	115.17	109.14	109.73	108.65	90.028	106.04	85.836
93.043	74.277	73.157	113.42	90.358	93.016	111.15	118.25	101.06	109.73	122.61	64.606	106.04	93.172
121.3	82.179	66.561	113.42	70.971	75.394	93.796	118.25	95.186	78.663	87.587	63.06	92.933	76.922
69.896	82.46	73.124	86.515	92.475	103.22	63.787	94.804	50.622	68.197	94.06	49.532	76.611	65.707
59.911	54.617	62.419	58.927	62.644	75.901	44.919	69.557	59.687	57.228	62.876	49.532	109.19	54.358
52.342	50.777	49.808	60.901	57.1	56.099	53.577	59.076	75.435	53.865	57.53	44.827	43.477	62.897
58.374	36.26	41.051	35.163	39.285	41.595	33.151	39.361	42.696	37.86	43.179	29.337	47.549	43.823
52.781	64.192	71.919	51.266	62.346	68.792	44.101	46.515	36.266	41.915	58.652	37.11	50.908	37.688
18.184	26.179	49.179	33.471	30.763	28.801	26.418	31.66	20.308	13.674	9.3579	19.787	13.18	28.644
29.139	39.355	59.103	63.216	55.612	57.922	40.146	75.017	33.843	18.94	16.322	28.558	10.804	27.118
38.493	47.825	59.545	76.467	61.95	70.306	35.385	71.455	32.93	17.34	17.506	25.456	38.522	18.332
29.681	45.378	63.757	76.467	64.591	56.397	35.385	73.766	32.071	19.774	21.094	26.553	17.33	16.291
45.642	53.613	69.083	96.62	83.583	90.19	53.145	100.97	53.896	22.782	20.561	36.633	14.433	29.27
42.246	50.313	56.629	87.319	64.433	77.665	53.932	78.403	40.548	27.486	18.496	49.685	16.386	27.012
41.885	39.183	56.629	61.56	37.132	47.966	38.223	56.747	31.667	21.601	30.346	27.225	46.22	28.117
41.438	47.552	57.959	68.192	62.58	90.997	41.068	77.499	34.016	22.699	16.601	36.663	21.318	27.894
50.514	67.376	68.131	140.38	98.312	114.83	54.387	121.83	43.033	29.926	28.456	40.083	20.76	30.942
49.473	52.623	64.976	90.665	73.305	77.727	58.855	92.69	49.937	25.098	17.999	28.963	16.329	29.925
38.552	45.121	70.156	86.458	73.305	77.727	41.083	76.299	41.791	28.051	16.313	28.226	13.422	25.976
42.626	40.43	33.476	75.056	56.779	98.981	40.998	74.129	41.791	20.04	19.208	27.693	13.422	20.187
44.45	24.464	29.007	51.224	43.645	51.34	31.339	51.028	27.13	12.708	12.602	19.849	11.132	13.242
44.22	33.131	45.445	68.687	56.045	65.508	27.636	58.851	34.663	17.927	18.222	19.17	23.872	15.351
19.458	32.799	35.36	57.096	58.056	65.508	26.543	58.851	21.983	15.557	15.478	18.222	13.914	11.463
22.872	24.475	51.771	43.166	39.207	42.859	23.379	49.038	21.674	12.13	8.4335	12.783	13.704	13.946
48.203	43.021	62.488	66.198	44.17	45.232	33.01	60.7	35.504	50.913	38.044	44.175	35.145	27.317
97.781	131.21	78.606	94.559	83.505	102.65	75.181	92.493	69.717	193.05	158.78	117.71	150.29	88.307
107.88	124.91	120.1	77.793	76.694	87.523	41.236	76.775	39.082	123.45	95.095	97.025	96.071	77.124
108.11	45.242	69.857	96.37	65.678	71.231	62.433	88.191	49.616	45.25	27.459	40.291	31.313	51.864
74.214	36.993	36.836	53.794	36.168	40.72	38.923	45.162	41.407	28.819	25.964	42.562	29.082	51.07
77.65	67.533	82.741	83.018	72.567	77.074	55.399	79.374	58.931	50.331	54.04	74.38	53.835	78.93
88.988	142.57	142.39	168.91	168.75	180.33	112.53	183.74	85.886	122.9	138.55	77.486	108.91	73.466
114.82	85.771	101.64	75.413	88.99	90	154.33	78.309	159.68	56.462	56.333	91.464	64.943	123.06
81.139	119.16	197.31	153.29	149.55	123.8	154.33	122.35	145.58	76.445	69.476	129.49	66.915	97.509
52.952	95.572	91.382	49.025	83.41	75.256	58.252	62.442	72.063	166.2	152.81	62.587	166.31	73.939
63.286	52.325	72.702	53.455	59.703	61.584	67.055	62.442	81.474	59.682	49.662	54.06	57.626	73.939
42.849	24.888	33.534	32.59	28.142	29.218	32.005	41.351	31.435	11.032	10.114	31.118	10.842	38.814
66.803	55.256	49.88	64.501	40.547	47.784	86.28	58.611	92.873	56.254	38.714	87.599	47.311	107.13
89.547	64.755	103.41	107.82	86.163	90.931	122.37	99.393	109.14	63.598	54.056	88.308	91.278	109.59
91.346	72.756	56.981	96.095	76.069	83.749	118.75	84.818	100.24	61.936	43.631	106.53	41.084	152.82
102.79	63.502	41.359	98.06	51.4	83.749	74.939	93.544	64.399	68.907	26.278	92.636	33.725	109.82
125.46	186.15	166.76	181.47	195.38	187.39	161.06	199.19	141.23	198.66	160.3	186.21	162.3	194
65.572	83.292	52.431	78.756	60.796	83.729	80.689	74.1	81.557	103.54	72.934	101.05	76.66	87.213
62.082	77.01	107.83	122.81	118.33	110.13	131.58	137.92	118.59	69.98	81.456	61.147	76.66	52.451
72.928	88.733	99.916	122.81	119.48	113.42	118.6	137.92	118.59	61.501	63.353	56.466	60.403	52.451
87.3	88.733	88.989	94.218	88.291	113.21	118.6	98.693	120.63	65.126	67.352	99.039	98.051	87.612
110.27	135.72	135.43	135.1	165.52	126.7	136.18	139.5	145.36	113.86	94.861	119.82	123.1	122.53
86.485	85.257	96.301	82.901	95.314	85.712	102.95	90.059	101.48	64.794	62.412	148.76	64.046	118.84
106.79	99.908	134.33	190.81	158.63	140.98	147.12	184.28	135.85	105.32	92.377	86.231	99.902	93.295
87.77	122.34	160.48	127.6	101.81	91.647	215.12	101.09	202.64	85.728	89.608	120.74	70.646	104.25
149.7	121.76	172.62	124.75	129.87	129.99	188.36	117.6	202.1	109.84	96.859	126.71	97.597	145.16
104.02	80.824	107.95	109.85	107.76	118.41	143.95	112.28	161.91	119.75	133.79	126.71	166.5	110.37
101.39	103.19	107.95	106.3	107.76	110.8	139.77	109.59	125.06	86.57	82.044	131.28	62.694	110.37
73.479	103.19	104.95	126.79	106.91	110.8	137.2	109.59	145.06	86.57	63.531	119.75	61.959	116.65
59.977	108.8	77.19	143.85	89.078	105.56	143.11	120.85	114.92	104.42	97.73	112.65	93.541	152.53
158.97	108.58	110.79	138.05	146.06	137.04	152.56	123.82	128.91	104.42	95.87	95.168	93.541	79.909
106.7	120.75	64.231	115.16	102.87	113.34	102.32	118.21	106.67	123.67	99.064	122.66	104.13	94.879
76.824	74.72	91.482	104.5	85.309	86.647	75.307	97.873	71.432	88.842	74.029	77.701	71.976	70.293
158.01	116.89	114.9	156.8	150.74	169.29	169.61	152.09	165.5	88.056	91.454	112.74	68.761	100.68
91.432	75.694	137.12	124.1	124.19	101.07	134.38	104.66	130.79	80.687	94.407	59.897	98.11	100.26
78.286	92.306	89.451	94.443	89.44	68.316	89.817	73.042	90.382	69.305	93.872	64.479	83.01	83.055
112.49	131.77	126.07	162.67	155.69	146.6	96.575	148.97	109.01	109.08	136.26	83.913	130.98	68.242
84.969	83.687	131.11	94.122	126.31	102.43	51.836	103.55	61.861	75.825	76.894	75.108	80.993	73.178
74.594	42.676	131.11	62.744	82.808	69.325	51.836	72.294	60.465	38.592	31.833	36.739	52.608	56.543
82.904	90.455	120.8	110.72	132.24	113.13	79.412	115.79	75.841	73.499	70.047	74.231	83.87	91.398
94.382	82.63	34.35	94.964	52.716	67.472	94.785	76.512	106.02	121.85	105.71	84.423	97.988	93.969
54.969	62.026	100.82	94.053	83.44	78.958	70.573	77.861	81.332	40.617	49.617	63.836	39.398	58.841
142.3	99.4	101.32	94.053	88.622	97.023	141.19	95.541	153.22	72.479	78.7	109.13	62.885	91.479
132.81	126.1	133.72	121.27	117.49	103.08	186.12	107.64	215.42	72.479	65.02	122.16	52.732	125.54
111.67	148.96	123.1	112.21	114.9	103.08	118.19	107.64	102.61	98.991	80.943	165.68	85.335	164.35
84.732	115.21	93.829	128.88	101.04	96.876	111.74	119.76	97.013	70.94	59.269	95.536	72.23	106.82
79.288	116.91	104.61	128.88	101.29	96.876	156.59	119.76	162.27	90.729	67.28	113.5	60.141	162.38
87.564	136.08	138.15	122.22	153.8	162.94	95.764	140.42	102.2	227.78	232.56	143.91	232.73	116.25
140.13	129.8	110.4	119.64	113.31	140.3	190.4	118.08	195.01	137.51	136.78	148.1	143.01	152.48
124.98	97.184	132.85	124.86	133.12	114.01	155.32	120.24	163.7	134.02	107.68	82.085	106.27	95.275
151.53	74.86	148.7	143.15	134.93	119.94	184.42	150.92	213.14	76.692	79.129	91.895	57.899	101.51
109.52	212.4	211.03	209.04	178.04	151.15	265.64	159.5	287.37	169.9	152.67	203.5	130	230.18
120.98	121.44	94.343	117.82	117.93	120.08	106.79	100.34	99.581	139.1	142.28	131.31	142.57	135.63
109.83	114.38	138.52	96.991	118.85	89.007	90.662	113.91	105.6	120.73	139.84	124.74	120.59	142.3
124.28	112.42	91.082	124.04	97.429	114.45	115.9	113.04	105.37	107.75	104.08	106.67	104.63	95.877
66.221	118.37	135.72	146.21	132.98	116.27	115.9	145.24	129.23	93.839	67.499	139.31	82.155	131.45
78.687	140.5	124.82	146.21	147.01	153.91	132.29	171.91	129.23	93.839	131.29	79.725	135.39	61.621
102.16	65.41	98.83	100.48	101.51	98.377	77.155	104.79	68.992	61.369	62.42	54.881	59.912	65.956
84.054	82.429	91.857	97.92	96.852	108.63	68.294	103.71	59.081	99.525	69.871	62.853	80.636	51.783
84.054	91.244	66.599	109.39	85.901	89.157	140.38	102.18	141.59	48.519	57.685	84.977	59.508	73.285
88.598	52.13	92.099	56.478	62.891	59.438	70.103	53.018	76.003	48.519	71.09	60.93	85.77	79.658
[truncated: 41,201 more rows]
