# Supplementary material for: Global sleep homeostasis reflects temporally and spatially integrated local cortical neuronal activity
Source: eLife. 2020 Jul 2;9:e54148. doi: 10.7554/eLife.54148 (PMC7332296; doi:10.7554/eLife.54148)
Supplement: Figure 1—source data 1. [file elife-54148-fig1-data1.zip › Figure 1/Slow Wave Activity/Slow-Wave-Activity-Mouse-6.csv]

Frontal EEG	Mean LFP	LFP 1	LFP 2	LFP 3	LFP 4	LFP 5	LFP 6	LFP 7	LFP 8	LFP 9	LFP 10	LFP 11	LFP 12	LFP 13	LFP 14	LFP 15	LFP 16
33.788	34.194	26.322	36.266	42.23	30.75	28.525	28.949	38.054	25.108	30.182	29.792	35.332	21.386	28.521	25.73	26.07	30.364
22.952	34.822	21.45	34.315	42.224	45.771	27.791	38.258	36.355	40.252	35.038	21.945	36.782	21.184	34.715	25.73	39.692	32.251
18.77	27.153	19.655	25.997	19.761	45.771	17.131	34.317	24.636	38.205	35.456	13.853	37.044	18.508	40.678	22.632	44.978	27.196
27.504	38.532	25.983	32.56	24.766	43.398	27.487	37.248	35.474	42.811	39.552	20.946	40.912	28.127	40.515	32.169	34.551	34.408
19.682	23.982	19.513	30.007	21.647	17.944	23.568	28.446	31.926	21.536	21.983	18.388	27.201	20.662	27.507	24.182	29.242	20.72
57.696	51.109	38.623	58.989	39.228	52.425	43.328	70.665	51.316	71.927	47.352	21.355	64.208	27.728	64.764	35.57	69.251	41.457
32.085	45.508	38.204	44.509	37.271	35.457	38.839	45.633	42.81	48.902	46.79	27.027	50.379	27.947	49.647	55.126	50.863	47.107
22.635	27.449	20.674	31.263	24.277	23.715	24.382	29.859	31.036	26.911	28.345	16.172	33.497	18.825	36.959	24.712	35.574	26.474
92.741	46.289	43.819	34.916	39.041	53.632	43.464	47.8	50.312	46.245	32.764	32.633	45.658	27.293	41.265	39.988	41.974	47.159
39.756	29.737	27.021	29.903	35.797	33.925	22.824	25.893	36.84	19.508	24.556	22.188	28.912	21.789	29.294	23.049	26.538	23.847
36.678	65.255	54.544	63.568	50.918	46.035	52.852	66.926	60.257	53.638	82.401	40.562	67.006	34.868	68.071	80.598	76.963	72.712
17.803	43.165	47.866	37.761	33.372	32.033	44.122	35.489	41.82	31.284	48.072	39.522	54.972	29.716	48.797	40.501	57.157	53.616
27.6	19.825	18.466	20.481	21.749	16.159	20.368	23.483	21.848	17.189	22.292	15.765	24.851	19.356	22.914	31.954	24.092	24.145
27.602	19.825	18.466	20.472	18.814	22.418	18.892	18.024	18.488	13.596	22.292	14.538	22.168	19.369	21.02	18.273	21.826	18.932
29.479	23.458	22.072	22.228	25.922	22.617	21.251	25.426	35.698	28.57	24.383	14.524	26.533	12.18	25.751	22.411	24.039	23.034
21.376	21.877	17.918	22.228	24.719	19.761	18.318	21.202	21.423	16.781	21.7	14.582	21.429	18.2	22.041	28.895	20.651	24.845
17.004	25.145	23.609	25.517	24.719	20.086	21.855	24.097	25.929	24.704	29.549	18.09	30.027	22.483	28.057	28.971	25.872	27.34
16.302	22.239	21.573	24.165	18.386	18.939	21.821	19.344	33.341	16.67	27.321	16.983	24.706	19.048	21.147	23.243	21.859	22.024
16.302	21.095	17.447	23.325	19.921	21.637	17.975	20.628	24.874	16.67	22.993	12.456	23.56	15.488	21.678	21.735	21.859	19.482
25.582	26.907	21.624	30.52	20.165	24.311	21.667	28.32	29.202	28.453	26.516	14.256	31.123	19.454	29.484	22.44	29.625	24.452
23.444	34.34	27.572	37.897	30.92	31.968	28.933	40.455	39.145	30.593	33.998	16.162	39.405	19.454	38.047	35.564	35.908	30.743
23.073	27.891	19.294	28.26	23.342	21.724	21.007	28.186	24.545	26.034	32.91	18.11	34.15	20.976	35.157	30.935	32.291	28.284
10.187	19.768	13.327	20.381	14.896	30.479	15.948	22.71	22.477	22.634	21.077	12.238	22.935	19.423	22.91	15.857	21.505	17.451
26.38	24.159	19.875	24.508	23.448	50.254	19.518	22.823	38.857	22.903	24.38	14.676	25.316	23.594	29.469	33.699	27.887	21.44
25.23	31.357	21.867	30.148	23.932	24.468	22.831	26.134	26.107	19.946	36.557	20.12	32.386	23.286	34.223	49.756	30.194	31.523
20.766	31.357	24.88	33.098	23.932	22.35	23.936	26.134	30.597	22.913	30.462	17.317	32.386	21.229	32.607	30.693	32.985	25.901
20.766	42.841	33.691	38.231	29.495	36.14	33.448	37.55	39.432	36.281	42.985	30.702	49.359	39.177	43.575	40.735	43.896	42.553
36.987	39.587	38.05	34.44	30.608	34.029	36.256	38.983	33.634	31.823	44.003	25.423	52.428	25.933	48.897	53.662	46.5	40.019
39.425	42.624	37.821	43.031	32.516	27.374	33.495	46.609	39.626	44.245	44.211	27.967	44.946	30.118	45.86	32.491	46.47	39.668
22.426	28.816	25.336	33.999	22.259	21.324	27.267	36.09	35.521	28.956	26.135	13.192	32.724	13.375	32.868	21.875	32.029	26.617
23.209	36.205	48.822	32.399	29.891	28.782	29.034	34.503	33.913	30.529	34.461	24.031	41.975	27.049	41.792	36.692	39.121	34.997
35.02	49.997	37.038	50.086	32.996	41.654	33.683	56.435	46.996	52.394	49.901	25.211	63.34	30.798	65.248	42.604	62.309	41.851
37.169	46.506	29.243	48.799	28.707	41.966	30.754	60.888	40.759	61.674	45.627	26.708	62.895	24.314	62.732	30.055	68.122	40.249
20.792	38.028	28.349	38.463	32.385	34.977	29.036	40.075	41.575	38.49	38.153	21.585	42.968	25.788	44.148	33.096	44.44	34.759
24.247	37.964	27.976	36.345	23.989	32.121	32.155	38.263	42.236	40.42	37.328	23.56	44.355	32.423	43.462	32.545	38.502	33.68
22.659	32.398	27.976	37.917	28.503	45.317	29.906	40.923	34.896	39.49	30.078	16.265	38.409	23.455	37.206	36.998	40.767	26.447
15.395	18.825	15.225	19.625	15.208	30.383	15.306	21.678	19.917	14.82	25.208	15.029	24.402	18.318	23.314	21.802	21.931	20.418
24.242	27.657	22.919	25.357	19.318	21.313	23.676	27.315	25.062	19.962	26.335	17.934	29.958	27.02	25.265	30.01	24.452	32.203
25.946	43.469	29.305	50.171	33.201	36.576	31.196	48.453	44.791	60.893	47.568	22.073	53.304	29.994	52.438	39.348	49.966	40.079
44.777	43.591	35.173	52.509	33.201	44.659	37.731	56.037	47.691	47.102	46.363	22.043	54.411	30.814	49.85	43.418	48.61	44.086
19.101	29.802	21.97	34.603	25.165	32.88	23.099	33.516	29.995	34.362	27.8	18.823	31.11	21.229	31.723	28.151	31.285	25.645
42.165	38.359	27.008	40.564	25.652	31.766	28.947	40.645	38.448	35.007	39.354	28.219	44.776	30.4	48.784	31.869	46.698	36.03
24.309	29.166	31.255	34.621	33.513	35.565	29.804	35.698	33.997	39.944	25.424	18.357	28.47	22.76	28.892	27.342	31.423	24.523
24.777	23.282	21.692	34.621	23.744	12.143	30.574	23.17	18.622	21.205	17.294	15.727	28.47	16.95	28.022	19.466	24.494	14.027
45.865	43.068	31.751	52.877	35.243	48.264	46.91	52.042	36.65	53.27	33.684	22.422	55.057	28.557	45.63	22.369	43.949	25.976
16.855	30.869	23.944	33.024	32.72	36.928	31.077	37.966	34.007	48.94	29.447	23.053	35.968	28.557	37.819	24.696	35.973	35.667
19.762	22.058	19.81	27.606	14.958	22.795	25.265	34.212	20.642	29.419	24.076	15.833	25.47	15.437	23.391	20.225	27.514	19.252
28.161	21.553	22.264	23.474	19.293	23.132	20.905	22.463	20.642	21.7	24.076	17.347	29.014	14.241	23.64	23.39	23.156	19.252
24.885	35.452	33.129	28.583	44.942	41.88	31.973	24.474	38.681	30.845	46.337	26.586	33.514	32.019	33.338	24.705	30.22	42.177
32.807	41.129	41.896	40.226	38.319	33.511	30.751	27.854	44.548	34.219	47.495	28.009	46.716	32.451	41.781	35.921	43.883	45.268
31.818	52.197	46.475	56.531	53.583	97.651	48.536	54.042	57.83	38.667	41.328	49.932	53.54	36.753	42.767	35.014	41.884	46.787
18.193	32.599	29.842	33.349	32.195	45.388	31.222	32.037	31.793	38.667	32.733	22.28	40.437	18.214	29.713	26.96	38.306	24.077
15.22	38.486	31.926	31.603	49.288	39.851	46.059	34.616	32.277	15.746	30.242	25.456	37.508	34.859	35.608	36.135	34.943	58.482
27.4	58.919	56.138	58.609	52.385	48.786	57.944	55.19	76.848	43.408	52.828	52.272	61.749	49.816	59.627	47.851	59.905	50.528
19.223	27.87	26.896	26.749	21.116	24.803	28.69	30.806	29.179	20.503	28.174	32.444	32.414	18.811	30.69	26.507	39.014	29.814
8.8883	40.616	35.987	38.071	31.726	27.576	35.97	36.931	43.618	29.914	35.306	40.207	46.184	32.024	46.843	33.528	44.588	36.414
26.009	40.245	30.325	44.14	32.173	33.786	39.095	44.349	38.348	34.435	38.29	26.8	43.804	35.17	41.03	38.528	41.764	37.312
10.704	31.576	34.347	29.505	47.143	25.348	28.038	28.838	41.709	23.443	46.864	44.456	36.063	31.48	34.192	32.726	38.688	49.858
10.704	40.036	54.01	29.505	62.666	28.729	52.537	28.838	52.897	31.053	37.016	33.069	40.326	31.957	38.295	30.059	32.922	47.803
11.358	43.404	54.01	39.382	62.666	45.91	52.537	40.307	58.33	41.409	37.016	33.069	40.326	41.007	38.295	30.059	35.748	47.803
19.72	39.733	40.099	36.364	42.857	26.698	36.982	34.3	35.854	29.382	48.867	38.088	42.646	29.878	42.404	39.881	34.282	42.749
16.611	32.288	34.904	35.926	35.583	26.982	30.612	34.3	34.36	28.591	31.149	30.775	35.64	21.658	34.796	29.727	33.349	31.061
14.288	36.164	28.028	33.071	36.885	34.042	26.745	28.905	28.137	27.81	34.093	29.626	39.741	42.747	39.466	33.169	35.741	30.405
21.198	48.657	37.862	51.984	36.885	36.432	50.933	54.042	44.72	40.377	48.775	33.949	53.744	42.627	47.584	52.413	48.886	47.423
19.974	29.455	28.539	27.666	25.161	30.766	22.587	29.753	28.368	23.284	30.267	19.9	29.886	21.089	32.132	30.103	33.723	30.083
25.354	47.197	44.209	47.07	40.715	73.206	37.185	46.046	46.597	35.909	46.825	28.357	51.534	31.418	53.166	41.161	55.814	48.022
39.816	68.294	59.221	70.054	49.328	73.206	90.613	75.758	65.809	50.298	59.058	34.163	77.938	31.669	66.942	55.914	72.134	70.4
28.1	40.184	38.59	34.445	42.917	28.441	35.095	28.648	61.602	25.039	21.137	29.738	43.019	24.398	37.551	36.499	29.241	20.138
22.057	39.296	35.149	38.691	39.076	34.179	47.998	39.362	48.058	27.364	34.158	27.04	43.95	26.929	42.216	30.014	40.068	35.226
28.836	39.296	38.162	47.232	45.109	27.51	34.622	38.672	38.977	34.154	38.56	23.515	41.492	28.152	37.409	30.014	40.486	44.631
47.335	46.7	41.767	48.875	36.518	35.159	41.118	46.823	45.006	48.585	45.67	34.437	52.07	40.49	55.863	38.262	53.641	47.12
25.323	57.888	44.151	48.082	41.416	45.059	54.615	60.053	49.269	36.777	46.158	42.073	56.85	52.395	51.128	51.271	45.94	52.075
16.813	46.137	42.553	46.068	36.544	48.359	39.557	47.708	49.269	46.716	45.587	41.806	55.517	46.15	52.252	38.129	47.848	44.664
77.056	48.555	57.405	46.068	44.471	45.082	64.742	67.901	49.509	46.803	45.307	44.123	55.517	53.473	52.252	40.669	49.351	45.592
60.184	39.41	35.093	39.217	35.391	37.68	46.936	45.138	32.612	27.052	24.815	27.729	42.849	37.626	39.475	29.042	38.85	36.128
35.376	22.318	17.672	21.13	39.929	32.818	33.216	25.31	40.503	26.332	19.496	15.72	26.394	20.648	24.446	16.611	20.994	20.521
71.557	56.768	50.771	48.537	64.132	44.85	52.033	50.172	63.187	41.231	59.745	47.946	65.137	37.761	64.33	50.731	65.043	64.89
53.048	44.089	57.358	48.206	48.242	44.85	51.37	44.401	50.481	33.721	43.995	41.488	42.988	30.908	41.996	37.915	46.008	43.629
20.377	34.953	47.744	41.15	25.358	57.246	26.03	36.34	28.908	24.989	28.848	24.176	30.554	21.433	32.508	23.744	36.919	35.375
18.111	29.492	30.186	42.31	28.183	57.246	22.858	38.568	26.011	32.481	26.574	18.132	32.96	16.795	31.539	18.819	37.588	32.216
23.807	62.368	61.313	65.351	55.18	93.687	55.316	64.426	57.62	64.694	48.574	39.994	60.6	63.012	68.167	47.098	67.437	91.243
22.244	31.86	25.294	34.589	31.516	62.655	32.777	38.874	32.048	26.244	27.674	31.274	33.396	20.147	26.942	25.913	30.524	22.893
28.018	50.533	47.898	53.013	61.972	50.208	42.71	50.31	41.617	43.6	44.566	37.098	49.736	31.571	50.36	35.068	34.241	62.327
20.222	31.171	38.442	37.047	27.913	31.608	32.029	38.909	35.421	30.743	32.18	18.8	35.907	21.12	36.69	32.14	34.33	31.909
34.758	19.639	17.006	18.398	19.352	26.911	21.374	16.986	22.135	19.393	23.249	18.8	23.34	27.707	24.405	17.194	22.595	22.319
23.299	39.362	38.22	40.836	39.189	103.74	33.424	40.796	44.475	35.559	32.896	45.667	36.796	34.45	37.11	27.736	38.175	44.342
71.48	46.238	43.833	55.769	44.179	53.931	41.489	54.452	63.775	43.581	46.479	31.929	49.831	31.851	51.387	45.336	48.062	38.455
32.534	51.267	44.778	51.572	50.651	39.926	52.441	51.991	65.165	41.827	61.71	42.025	63.1	36.422	54.855	47.754	61.423	71.505
32.534	31.801	25.36	34.654	32.787	41.065	28.061	32.818	35.85	24.349	26.253	23.466	33.809	26.884	32.224	31.815	31.092	36.169
24.664	63.234	52.353	72.149	59.807	93.214	69.219	64.238	64.131	41.99	41.814	38.777	61.816	34.921	47.135	40.201	40.909	48.232
46.65	26.824	23.855	31.402	18.257	31.227	23.719	33.758	27.22	34.513	29.123	30.488	25.878	24.477	28.315	17.821	31.101	27.975
19.389	35.001	48.237	40.653	56.825	51.474	27.689	36.431	56.52	20.627	36.281	23.261	36.284	15.439	34.959	22.128	29.59	30.096
18.073	35.001	48.237	39.187	45.95	75.175	27.689	28.166	45.835	17.093	25.453	26.938	36.284	20.679	29.985	20.405	29.59	30.096
42.835	62.186	58.631	64.267	87.591	77.469	55.332	59.951	62.72	51.366	46.165	51.934	55.653	48.522	51.65	45.707	60.36	57.332
67.197	50.36	62.313	62.671	36.992	84.656	50.674	59.174	66.166	43.795	36.496	33.079	46.752	45.467	40.693	44.276	42.137	32.409
18.355	41.71	35.195	39.034	41.83	120.36	61.214	46.241	44.061	41.497	36.173	33.774	41.116	26.199	35.122	27.878	41.519	42.929
16.928	37.441	34.685	36.789	41.83	40.717	33.639	38.968	37.072	47.944	44.198	30.124	40.402	37.63	42.432	36.074	35.405	47.029
25.423	37.441	34.685	39.669	24.521	34.254	39.31	36.725	43.333	28.569	39.468	30.124	44.574	36.328	43.723	42.754	43.644	34.221
18.278	44.411	44.734	51.663	36.223	91.66	49.668	46.06	44.798	33.771	32.658	39.443	46.478	36.463	45.931	42.754	41.395	31.337
22.741	40.652	37.663	47.557	44.997	44.602	48.246	53.255	47.702	41.351	36.588	26.418	50.274	23.37	43.533	29.002	40.551	32.322
29.359	60.638	51.712	58.775	52.268	68.54	55.179	55.164	71.859	58.054	52.782	25.59	67.092	25.132	61.926	53.347	52.726	56.901
27.327	51.72	42.179	47.611	46.06	42.994	58.583	58.828	44.252	50.325	47.354	50.147	61.302	34.439	59.193	38.038	63.249	57.831
46.035	51.72	45.53	47.724	44.953	49.494	53.861	56.726	60.415	50.325	47.354	33.631	61.302	40.18	59.193	42.204	63.249	45.421
33.475	56.896	56.179	58.08	65.248	44.299	49.242	56.726	54.549	41.22	58.675	33.021	65.513	44.247	61.757	47.646	51.984	52.699
20.019	33.989	29.98	34.209	31.165	29.925	32.539	40.339	42.057	28.629	35.602	22.679	39.697	21.888	40.335	33.672	41.393	30.941
25.436	33.183	30.977	30.783	28.681	44.495	27.748	36.517	42.064	35.836	30.657	19.251	33.586	26.234	33.082	25.479	30.167	29.136
32.106	29.171	31.821	33.142	25.582	24.593	34.341	36.486	35.998	36.75	26.195	17.314	33.586	15.811	32.652	22.968	34.197	39.013
41.393	42.672	47.025	43.658	39.239	36.328	42.325	40.296	49.008	36.75	39.285	39.749	42.164	24.257	38.818	34.444	39.005	49.527
22.424	27.197	26.152	32.345	51.247	22.032	34.614	31.145	29.647	27.674	28.418	18.178	36.604	19.162	29.683	28.672	25.878	24.308
19.248	27.197	31.339	27.173	48.595	34.465	22.205	22.967	29.647	22.129	32.873	20.529	35.357	17.347	29.628	31.714	25.166	32.252
25.336	37.823	34.428	38.804	36.478	33.527	37.526	53.273	39.47	37.24	40.611	23.836	46.746	35.011	44.429	31.714	47.497	35.763
41.316	49.522	42.682	61.856	41.842	39.476	56.608	66.611	54.907	52.839	37.332	30.717	54.853	37.664	50.588	32.634	51.72	41.144
32.77	32.68	30.157	28.305	29.74	33.766	30.938	33.828	32.833	26.688	24.447	30.468	33.601	28.107	28.693	34.018	29.719	33.204
27.397	18.425	20.368	17.443	32.562	20.344	16.914	16.63	21.657	19.365	24.074	19.09	21.023	13.519	19.792	18.02	18.883	15.942
22.984	25.102	20.555	26.613	27.619	30.597	22.757	21.871	33.219	25.622	25.392	18.707	34.386	29.124	31.513	21.799	32.926	23.332
19.454	34.857	32.067	35.441	38.06	37.322	34.927	36.605	34.206	31.327	31.737	23.244	35.011	29.124	36.117	29.444	33.836	36.447
17.57	23.069	22.697	25.752	21.08	61.299	19.556	21.1	43.094	25.506	16.928	17.345	20.442	17.733	19.138	20.568	15.856	26.352
15.273	32.592	25.126	36.365	30.629	73.217	28.174	37.322	37.635	28.086	26.111	17.215	36.05	17.06	37.643	25.264	29.568	28.707
21.19	29.284	23.453	31.896	29.582	23.42	29.867	30.805	36.381	26.374	27.042	19.237	32.051	15.467	31.352	25.197	28.677	27.345
22.671	27.626	21.263	34.739	15.766	22.936	33.279	34.994	24.265	23.889	26.576	16.818	34.191	19.674	34.553	19.374	32.745	27.157
27.566	37.593	41.036	35.677	41.63	39.739	45.107	39.824	43.418	28.14	34.656	27.021	42.078	22.756	37.395	28.165	43.333	33.836
20.457	45.526	56.55	67.865	22.905	47.933	51.184	65.483	49	52.341	32.797	25.574	46.971	30.813	43.546	42.395	37.046	38.132
41.403	43.981	55.322	47.717	26.537	29.129	49.558	49.548	49	39.086	30.252	28.287	40.339	36.321	41.987	39.282	37.046	38.132
34.583	51.912	50.899	50.552	43.128	47.95	55.421	57.79	60.663	43.751	40.493	44.61	51.733	50.674	50.163	38.312	51.124	39.936
22.567	29.835	27.292	39.332	25.144	44.504	30.428	40.617	37.293	31.207	26.03	21.578	44.16	23.831	43.74	22.531	40.811	20.744
18.27	32.142	25.112	33.277	27.332	32.634	27.46	33.249	31.751	27.686	36.68	21.943	32.002	19.016	34.447	34.253	32.38	36.434
21.768	33.152	33.252	37.733	27.717	27.09	28.454	32.115	37.157	27.686	34.165	23.462	33.386	22.508	35.505	26.837	33.235	38.685
28.006	33.385	31.352	34.661	25.235	38.319	50.66	42.366	31.702	33.336	30.712	20.05	35.988	19.83	35.076	24.498	36.442	29.413
50.714	62.093	53.369	56.08	62.626	47.256	55.326	57.472	67.338	54.949	65.033	42.054	74.927	47.59	71.102	60.468	60.237	67.139
32.234	55.607	50.252	56.151	47.695	41.209	49.484	63.866	58.073	56.348	51.611	42.966	52.495	45.908	53.173	55.236	47.034	56.453
50.26	34.172	31.377	45.706	27.85	23.748	42.455	39.02	35.37	27.797	33.846	26.964	32.141	23.86	32.622	32.157	31.99	27.639
50.26	46.623	39.658	56.459	54.916	40.324	50.58	52.407	53.522	33.016	44.2	30.027	55.591	31.885	50.901	52.814	50.559	43.179
37.242	64.397	54.959	74.905	54.991	64.323	93.92	83.655	68.69	47.482	47.676	45.642	64.389	28.952	59.61	63.539	62.696	47.478
36.301	69.674	61.161	65.529	58.233	51.135	61.034	66.219	65.51	60.025	62.793	46.525	74.373	50.87	75.184	58.801	63.645	65.29
50.671	107	92.85	103.93	100.78	73.732	112.19	109.49	93.521	88.163	89.817	78.113	120.69	79.731	116.5	83.89	114.69	97.612
59.53	91.909	89.19	97.865	67.982	86.521	106.55	102.09	110.14	62.485	80.798	73.115	104.6	50.124	106.18	113.36	81.792	103.04
48.465	65.053	50.216	64.986	51.152	51.668	68.248	74.463	64.677	59.687	59.281	39.35	68.517	41.888	76.87	48.469	64.769	61.767
46.278	69.1	69.805	75.645	75.639	63.28	85.682	75.163	62.444	51.492	66.272	52.538	68.517	54.169	76.939	41.87	71.118	71.244
28.906	39.587	41.405	38.469	31.453	28.215	46.855	39.755	37.794	36.793	39.388	30.978	45.34	31.689	45.397	33.414	41.756	45.109
27.279	48.419	37.788	49.004	35.969	41.01	61.543	60.341	51.015	48.218	36.281	24.694	49.402	35.671	46.673	39.032	45.398	50.293
61.058	51.108	40.861	48.117	39.668	45.506	50.411	47.081	51.015	37.884	47.447	39.322	55.716	44.681	56.171	50.543	50.596	53.225
50.856	51.718	36.188	52.47	41.293	46.685	54.485	46.115	51.663	44.426	59.088	45.321	61.241	43.814	63.567	29.053	48.613	52.932
42.688	45.669	42.353	47.986	37.836	33.299	68.076	49.871	55.542	37.194	38.011	51.44	56.177	37.016	49.025	57.345	39.994	53.916
27.571	70.359	64.73	75.577	46.089	54.069	119.52	90.199	51.938	58.51	46.815	61.046	78.605	60.11	66.043	49.509	78.732	55.503
32.077	37.114	32.413	41.819	34.942	46.364	33.277	42.327	41.419	35.439	36.518	22.371	49.579	30.123	42.16	35.442	37.024	38.446
29.331	64.071	96.973	59.33	63.071	68.029	67.649	61.483	53.899	50.254	53.219	37.226	70.856	47.65	66.792	59.083	60.662	45.11
27.851	45.697	37.232	47.789	45.25	43.812	46.609	48.114	49.851	43.562	41.672	29.974	50.594	31.716	51.52	36.25	46.823	48.146
70.902	59.478	45.968	60.919	50.677	49.319	53.752	66.825	57.013	67.84	51.978	40.16	68.44	37.575	61.873	48.879	64.468	56.902
36.157	40.047	32.272	45.088	31.728	51.987	33.542	42.455	47.879	40.276	40.124	24.878	49.986	36.953	50.095	36.972	43.683	35.799
44.816	34.048	33.003	29.426	26.275	45.834	36.206	43.479	43.196	34.255	30.765	25.479	34.665	34.127	35.175	37.157	37.147	51.285
22.956	56.243	44.476	44.967	39.234	69.429	41.526	45.972	45.24	57.5	42.912	34.75	47.659	43.138	49.366	39.503	64.024	56.951
21.499	46.333	37.207	39.431	35.855	66.826	54.729	37.835	55.128	41.706	46.088	56.108	45.403	34.286	42.974	36.12	41.564	59.306
65.853	70.234	54.289	64.371	71.889	68.01	67.85	70.731	69.354	51.743	56.678	56.108	75.878	49.528	68.429	56.203	66.003	64.571
44.46	81.725	80.693	72.161	90.015	48.352	91.909	76.957	86.924	64.986	70.595	68.264	81.375	75.568	78.4	59.69	79.638	79.565
40.693	72.687	43.541	71.266	63.445	43.935	72.26	73.168	66.858	59.97	62.022	52.351	76.563	58.544	70.652	52.073	77.148	63.492
30.181	62.76	43.234	64.086	48.701	45.222	52.544	60.525	61.033	50.488	61.423	39.737	73.261	40.256	70.652	52.073	68.24	58.14
51.342	51.225	54.528	56.21	42.904	45.222	44.227	49.048	50.158	48.304	52.335	39.737	57.064	40.371	55.468	41.09	52.465	51.954
64.04	67.338	56.498	59.72	77.347	52.048	56.778	71.136	60.493	60.286	52.335	41.863	78.601	37.887	72.73	59.637	66.118	63.413
61.433	42.336	38.022	46.022	33.433	32.174	40.562	53.133	33.044	44.543	44.722	29.834	47.192	34.214	48.153	35.736	59.686	42.263
51.258	38.716	38.247	36.67	34.496	33.804	35.496	34.972	59.322	27.864	36.361	49.254	42.163	41.347	40.264	34.234	35.41	42.901
62.29	69.287	47.228	74.643	64.304	80.547	67.675	80.391	66.219	75.61	50.185	47.528	69.814	44.435	67.123	58.241	62.458	50.168
35.442	36.384	32.427	37.768	30.605	57.939	33.912	39.361	43.286	41.765	35.835	22.704	40.198	21.953	44.258	31.808	42.417	34.633
31.293	36.577	40.801	37.452	29.174	93.809	32.162	40.263	36.476	46.478	37.673	30.104	44.078	25.613	41.509	30.766	61.327	41.286
48.088	52.583	47.112	52.58	50.61	57.036	53.387	55.747	50.976	47.881	54.609	43.563	63.471	44.224	57.978	47.643	75.824	50.392
47.237	66.538	54.767	58.378	68.757	75.915	61.393	62.715	68.245	44.057	54.609	45.073	67.201	44.513	57.978	47.643	53.355	50.392
37.267	68.48	84.369	58.254	56.374	54.458	54.948	55.783	70.113	54.161	65.88	46.495	68.356	37.546	56.52	67.954	64.767	64.184
55.678	60.664	56.857	60.952	47.483	58.257	72.412	61.614	58.811	43.712	54.12	41.547	64.273	52.515	60.2	56.987	55.69	70.111
31.96	66.162	70.012	65.833	55.121	60.275	62.341	62.517	63.468	55.821	65.567	48.715	70.209	44.36	68.501	61.527	63.725	66.105
29.296	42.816	26.474	31.706	35.143	38.068	57.619	43.822	54.454	32.472	34.937	25.956	51.439	28.66	46.373	28.289	51.419	78.37
33.16	38.955	34.863	38.65	30.909	30.882	37.406	38.158	43.279	32.732	39.556	25.698	45.971	26.155	41.461	38.729	36.553	37.028
33.613	52.378	39.052	48.616	35.08	46.475	47.288	51.061	52.096	48.08	52.062	35.778	61.784	40.763	64.363	48.459	55.457	51.621
28.185	54.43	52.327	47.433	102.56	52.806	54.777	45.557	53.062	46.222	44.779	40.888	54.75	39.18	51.34	37.567	50.757	40.703
19.086	24.046	34.682	18.006	48.703	24.55	23.88	18.768	21.325	24.979	25.244	20.324	24.228	24.567	24.622	20.02	31.789	26.243
21.879	57.256	48.842	54.733	71.144	58.725	51.721	56.771	54.146	62.086	62.456	32.964	50.594	37.309	49.678	39.258	58.122	66.541
31.012	54.302	44.876	56.713	53.792	52.684	47.35	56.397	54.47	45.48	63.018	34.844	58.67	36.598	56.845	48.491	59.696	65.35
27.22	51.628	35.139	45.09	44.533	47.547	38.562	49.307	49.925	47.879	54.211	35.783	58.67	36.76	56.845	45.23	53.299	50.747
34.316	54.68	46.549	50.192	42.67	66.522	47.74	55.455	53.324	45.193	51.776	33.283	69.629	42.323	64.541	45.154	61.031	51.187
23.966	49.545	46.549	51.055	53.292	58.708	47.74	45.168	63.28	34.165	45.799	33.283	53.97	32.114	51.344	45.908	47.84	45.51
23.787	42.898	48.004	37.332	40.746	41.554	40.769	35.872	37.532	33.314	39.658	32.287	46.119	32.114	41.981	36.189	41.625	41.54
41.856	41.49	34.373	36.779	43.322	46.948	36.25	40.224	45.285	42.85	41.69	28.474	49.171	27.404	39.085	41.599	37.063	39.22
17.844	41.49	34.373	35.457	43.322	50.703	37.366	41.719	45.285	45.225	44.475	28.474	49.171	25.334	39.085	41.599	37.063	41.142
11.784	20.295	25.563	17.946	23.189	15.367	21.106	18.26	21.988	12.951	29.379	20.83	22.653	21.254	23.705	21.153	21.103	24.854
50.547	68.459	62.411	89.537	64.21	75.783	66.842	81.14	64.193	69.199	55.695	45.5	65.823	52.179	61.906	41.217	59.255	74.023
50.775	50.827	41.964	50.762	45.288	39.365	51.707	54.226	47.566	53.224	48.655	29.201	54.177	33.108	50.256	41.217	58.527	59.948
15.538	27.38	23.492	27.662	23.13	23.588	25.689	30.872	25.338	24.734	32.438	21.744	32.312	22.228	28.77	39.106	29.118	28.048
19.878	36.419	29.066	30.955	40.893	38.769	25.328	32.458	37.476	32.125	54.201	32.411	40.108	25.834	35.061	42.7	42.1	53.163
29.335	53.553	48.122	52.274	55.287	42.82	43.305	49.832	53.628	53.958	58.81	43.06	59.193	44.46	60.593	66.562	56.013	73.032
29.335	51.253	43.113	41.028	43.351	39.7	43.305	47.94	47.173	48.5	51.259	33.627	54.748	34.004	53.971	45.712	51.687	54.435
26.547	48.734	38.717	53.751	34.749	57.953	42.805	52.135	47.865	43.694	46.606	31.309	55.852	33.82	52.147	49.767	48.145	45.543
30.152	36.111	32.386	34.216	28.905	22.086	37.113	37.711	40.047	33.087	35.211	31.309	37.395	26.777	35.915	31.112	38.541	38.063
51.704	46.21	40.777	47.801	47.657	41.39	46.386	47.39	53.413	41.235	41.112	26.481	54.579	39.287	50.563	36.38	46.597	59.698
46.318	52.624	39.837	49.147	76.447	65.074	47.253	49.365	57.452	41.589	44.739	35.511	53.376	35.469	57.706	43.872	52.075	41.036
23.391	50.603	42.557	55.123	45.221	50.268	43.036	47.156	58.555	38.356	47.852	35.511	53.914	35.382	52.426	43.534	49.772	41.936
39.035	39.808	34.042	50.783	38.87	37.874	31.762	42.17	42.193	39.256	39.945	38.69	44.897	28.741	41.787	54.81	39.789	34.552
22.516	31.76	24.556	50.783	30.344	35.788	27.469	34.957	36.128	38.484	27.671	18.226	33.065	29.107	34.365	26.209	31.163	24.134
45.893	45.171	29.815	36.99	32.542	53.563	36.064	44.376	44.38	37.256	39.155	29.876	49.734	34.471	48.732	54.366	40.519	43.662
32.555	33.282	23.692	35.88	21.266	28.626	24.124	33.108	37.623	32.538	36.213	18.272	34.732	21.842	37.563	33.088	35.015	32.353
23.556	37.134	28.269	48.51	36.954	38.063	29.75	39.11	42.665	33.903	42.591	21.662	39.194	23.651	38.005	33.088	35.796	32.999
14.802	28.992	23.141	28.715	21.116	27.083	19.749	33.453	25.22	33.981	31.736	19.651	37.353	24.977	36.568	22.258	36.424	29.514
14.384	21.868	21.008	22.286	28.13	17.264	20.57	21.762	22.369	19.619	22.622	18.093	25.32	19.227	23.737	22.389	22.294	20.1
24.123	32.935	26.046	34.974	28.195	31.167	25.89	33.891	40.061	33.062	32.639	18.057	35.236	26.349	35.518	25.962	34.922	32.369
20.542	30.041	23.31	29.385	26.729	34.249	25.89	29.668	35.414	30.783	32.104	16.754	33.481	17.985	35.008	27.793	31.343	31.934
16.929	26.313	17.949	25.194	21.96	28.029	19.171	28.409	25.18	29.834	27.783	13.067	34.909	15.383	35.139	26.794	31.343	27.085
23.297	22.241	17.258	26.028	14.596	19.569	22.436	25.244	28.051	22.244	23.882	12.75	26.046	13.871	23.945	20.027	23.518	21.563
23.297	21.207	15.747	20.052	16.348	17.46	14.111	22.621	24.904	21.302	23.882	12.75	26.344	15.433	27.683	17.358	27.603	21.919
26.745	34.197	24.232	37.133	23.071	33.29	24.559	38.405	39.111	31.746	34.603	20.105	42.513	24.253	42.695	32.034	45.009	30.078
27.704	24.066	19.148	29.82	20.751	28.907	21.394	29.247	29.107	25.723	27.102	14.246	29.067	19.692	29.221	20.667	29.546	20.138
26.605	28.228	27.187	28.782	29.76	20.427	20.079	33.343	31.771	30.055	34.136	16.059	37.041	19.116	34.695	30.586	33.898	27.237
26.9	26.145	16.86	28.782	27.542	27.003	18.75	27.844	31.771	30.055	27.374	16.101	31.308	19.116	30.646	22.767	30.88	24.29
26.9	30.948	26.505	37.775	27.542	25.141	28.201	34.828	32.589	23.277	33.194	20.092	37.438	21.986	35.274	32.29	35.796	32.924
25.819	32.041	26.713	38.48	23.378	31.502	29.159	34.784	30.625	24.755	26.085	18.444	38.511	18.561	35.274	18.369	35.796	29.557
18.76	34.601	28.86	39.699	19.812	54.485	35.407	34.073	40.17	34.675	31.305	29.052	40.929	21.944	35.456	19.292	43.622	35.15
36.666	30.53	21.711	30.921	19.138	52.092	24.341	34.681	32.409	35.747	32.358	17.629	38.361	19.017	38.566	27.927	40.409	35.15
48.093	57.402	40.7	51.674	36.309	72.522	59.923	64.166	44.873	46.049	43.313	45.51	62.95	46.548	55.864	60.19	64.192	42.014
52.813	72.757	57.176	65.597	56.953	66.597	60.787	76.55	67.362	79.841	71.254	45.51	78.495	50.796	80.782	63.379	77.714	63.118
46.415	47.083	36.034	53.038	41.604	56.369	46.402	54.071	53.141	49.647	47.33	36.362	54.066	31.017	56.431	39.598	53.436	41.502
20.35	28.983	23.618	33.726	23.94	24.918	24.264	31.252	28.109	30.611	30.794	15.001	35.908	16.426	35.435	27.627	33.636	29.22
21.721	19.931	17.573	29.183	22.624	21.443	17.32	26.119	21.725	18.235	25.617	18.539	27.074	15.49	23.758	18.853	26.219	28.264
19.651	29.812	26.409	38.743	26.412	29.831	25.778	28.363	37.044	28.676	30.288	20.292	34.697	23.938	31.265	27.29	27.655	28.756
22.373	32.308	26.595	35.58	30.192	24.976	29.931	40.537	39.947	35.112	29.925	23.767	42.197	24.37	39.527	28.99	38.619	25.888
26.059	18.869	13.487	26.709	20.779	16.313	18.103	23.992	24.248	19.449	25.62	12.233	23.727	14.524	23.312	16.444	26.508	21.3
16.481	19.546	17.314	26.709	19.194	19.878	18.475	25.335	24.248	25.573	21.041	10.27	23.727	11.493	23.312	24.763	26.508	17.861
26.18	30.707	25.66	38.891	31.37	25.448	32.345	31.938	43.357	35.392	28.459	15.35	34.321	18.103	34.05	29.852	33.107	24.13
20.6	30.707	25.66	38.891	31.37	33.565	32.345	37.903	39.499	35.392	25.188	15.35	32.819	18.103	28.361	24.416	26.553	27.605
15.949	25.394	23.043	32.845	29.231	20.734	22.219	26.836	31.592	25.475	23.744	18.133	28.259	16.747	25.503	33.037	23.09	25.075
19.041	40.139	44.154	41.519	42.118	27.67	39.991	35.686	46.256	27.976	40.666	39.095	35.514	41.104	34.284	39.908	38.306	43.112
22.459	32.317	28.282	42.499	38.31	27.67	24.706	34.66	45.76	29.359	34.605	18.985	32.582	20.402	34.56	37.884	37.674	23.689
11.463	22.516	20.239	23.036	18.174	21.379	19.096	22.808	27.584	17.255	23.384	15.223	28.387	22.026	25.702	34.879	25.583	21.619
27.685	28.558	21.586	30.809	20.844	23.588	24.313	31.314	30.036	35.902	21.984	19.188	31.17	19.134	34.584	29.169	27.545	15.52
28.291	28.558	17.863	37.71	29.51	25.171	21.149	31.314	31.336	42.808	20.444	15.649	31.17	21.515	34.584	29.765	27.545	15.311
18.239	21.378	17.701	36.086	15.726	28.251	18.225	29.114	24.883	27.377	20.522	13.584	27.427	17.835	26.749	16.182	32.079	22.533
25.498	32.8	23.889	60.277	32.114	34.593	23.5	43.134	29.403	47.482	31.335	17.823	37.65	14.62	37.108	33.715	40.986	25.033
15.705	27.811	22.627	39.415	23.314	24.024	22.096	33.725	28.305	31.777	29.092	15.185	33.501	16.881	29.452	31.528	32.385	24.607
17.721	24.342	20.478	39.415	20.182	18.888	21.626	29.38	26.167	23.446	24.305	15.039	27.154	16.881	26.474	28.686	27.471	23.153
30.908	15.294	12.592	16.062	11.798	12.25	14.72	19.287	18.439	18.938	14.028	14.601	20.875	13.123	18.361	14.757	20.038	14.537
26.644	24.054	21.83	28.53	25.698	17.609	27.363	27.843	31.296	21.831	24.98	17.934	29.42	18.781	27.54	20.824	24.491	24.177
32.966	29.582	28.228	28.53	35.961	29.473	27.363	34.683	32.326	24.02	29.873	23.57	30.619	20.066	31.868	23.416	32.509	30.571
40.409	63.996	62.324	57.774	48.4	49.329	53.74	57.791	66.166	61.627	61.899	44.222	64.63	47.552	67.278	65.197	64.37	57.701
43.151	62.392	52.246	56.29	47.386	53.011	49.67	57.791	55.319	61.174	69.099	46.757	64.056	45.465	67.164	50.625	66.083	56.953
29.615	54.066	50.021	57.038	58.609	49.67	49.41	53.495	64.022	52.286	50.544	37.13	55.031	36.078	54.846	42.227	47.123	65.277
32.854	39.549	33.142	55.128	43.848	38.909	40.869	41.463	47.477	48.835	40.238	31.523	43.42	26.919	40.207	27.719	35.665	37.757
32.854	60.772	54.264	62.8	54.081	59.035	65.107	66.564	66.726	55.598	57.527	33.935	73.264	41.269	65.358	42.673	61.099	50.747
56.302	65.326	54.515	60.725	52.555	51.232	54.348	63.785	63.838	59.14	63.453	42.329	70.155	39.923	65.358	59.781	71.087	61.366
56.302	40.228	31.858	40.324	33.808	35.751	32.598	43.116	34.021	43.176	41.286	25.995	48.835	26.63	49.737	35.747	45.361	36.733
56.482	58.043	45.321	62.043	41.632	51.84	48.128	64.225	42.772	56.502	55.269	35.624	65.28	44.441	60.996	60.604	55.324	47.645
40.407	30.683	24.621	33.029	22.238	43.956	29.64	38.612	30.16	27.26	32.715	21.621	34.555	23.265	33.882	36.166	33.629	30.121
15.96	48.577	48.603	48.545	51.049	56.962	47.502	47.507	52.006	35.757	49.51	38.284	51.53	32.532	52.039	44.461	47.121	48.874
17.711	37.687	38.249	46.05	31.72	27.273	34.614	41.554	51.563	36.473	39.835	27.924	43.692	26.708	40.814	39.474	38.288	38.321
30.397	37.687	29.673	49.499	34.364	35.833	32.079	40.292	48.009	40.673	39.835	27.924	43.692	26.108	42.042	43.497	40.013	40.386
15.526	35.325	56.628	49.499	25.962	36.289	28.28	38.45	44.165	37.203	36.434	27.208	39.172	22.201	36.595	32.125	37.462	26.448
21.898	39.836	42.668	34.989	33.107	27.913	38.777	35.29	36.27	32.097	43.529	35.734	35.644	36.604	37.029	39.969	44.697	47.515
21.898	63.43	56.02	61.323	49.631	42.048	56.683	51.722	53.321	55.498	64.315	51.655	64.573	56.063	75.423	52.578	68.618	67.538
31.227	56.791	45.294	49.937	43.653	45.005	44.527	50.858	50.562	39.92	60.029	44.589	61.273	49.126	60.468	52.446	56.64	66.917
18.687	28.166	21.549	29.233	21.282	21.88	27.519	26.258	26.501	24.682	29.88	15.029	29.78	30.021	29.063	35.437	26.325	31.158
22.192	21.256	18.208	29.813	26.575	15.415	24.029	23.448	22.52	21.365	24.316	18.491	25.484	17.585	24.317	22.397	22.829	21.604
34.279	22.949	18.208	29.813	26.575	19.98	24.029	27.712	26.4	27.255	24.316	18.491	26.01	22.34	27.051	27.666	28.43	23.64
34.279	37.764	36.993	32.948	37.094	29.229	34.584	33.703	47.133	31.123	36.977	35.463	42.972	36.136	44.364	38.403	39.202	46.493
50.813	47.731	45.466	43.223	35.007	73.427	57.29	52.958	45.263	38.005	30.526	31.295	44.038	25.49	43.431	36.065	39.368	40.693
34.902	38.375	32.759	37.411	37.699	27.969	28.927	39.03	41.974	32.039	36.47	19.255	43.244	48.535	43.431	39.514	39.17	35.01
51.678	49.084	47.374	45.125	35.721	37.034	46.64	48.969	50.304	52.271	43.174	39.248	50.264	51.884	55.626	39.977	45.414	44.784
42.795	52.575	47.374	52.213	43.253	52.259	47.511	53.724	68.953	46.99	50.25	38.138	55.483	38.015	59.295	50.001	54.939	47.211
66.127	52.575	43.304	55.487	52.944	43.541	43.953	53.724	67.443	44.668	50.25	30.79	52.958	33.855	59.295	40.973	54.939	41.567
30.753	50.921	42.825	49.66	41.65	47.752	41.611	52.102	51.72	43.375	50.695	35.351	55.983	36.319	48.15	40.973	50.254	41.567
54.646	52.674	43.179	55.402	49.479	44.025	42.067	54.416	58.502	46.02	52.785	42.054	61.437	39.439	61.159	48.581	53.803	54.571
54.523	57.868	43.921	46.898	42.467	40.267	52.17	49.39	43.642	42.962	51.064	35.053	58.337	37	59.498	55.329	62.548	55.216
54.618	57.942	51.961	56.183	47.229	44.664	52.799	54.259	65.218	51.199	60.642	42.085	69.348	45.404	65.286	48.572	62.548	52.256
27.462	28.69	27.09	32.514	31.876	28.587	28.613	30.974	33.695	25.927	32.681	25.552	33.1	21.134	33.613	25.335	30.535	30.435
30.663	42.066	35.114	41.705	43.213	38.359	36.986	43.436	40.06	33.183	45.305	31.253	47.535	34.497	48.872	42.382	43.132	39.996
22.553	30.208	23.729	31.757	21.752	67.934	21.888	29.152	27.575	28.578	38.806	25.077	38.102	24.376	31.929	25.86	35.805	36.997
11.997	53.799	46.057	45.454	54.137	35.104	42.861	42.635	57.734	40.095	56.957	43.585	60.125	42.165	52.043	52.735	48.552	63.782
45.409	41.684	42.548	43.786	46.399	47.816	37.453	43.268	45.392	36.074	33.41	27.289	51.166	26.219	41.179	36.579	48.552	29.869
56.465	41.51	47.381	39.129	37.054	33.288	41.57	45.085	43.377	36.074	34.142	27.289	43.954	30.315	38.156	31.156	47.828	29.869
30.34	22.961	22.685	22.216	29.827	51.168	21.319	22.98	28.474	19.219	25.606	24.451	30.683	17.245	28.536	16.715	28.116	25.232
39.433	57.694	57.447	51.707	71.766	84.735	51.515	50.646	51.921	42.677	47.337	34.349	72.697	52.533	68.733	47.698	70.866	65.056
17.696	25.917	25.38	23.078	26.039	28.334	18.89	22.605	21.48	30.028	30.625	20.701	25.547	23.842	29.898	31.055	29.703	33.49
34.619	34.44	33.23	33.061	30.718	32.572	25.897	24.395	28.691	25.209	33.597	32.483	41.079	28.692	38.463	38.42	36.023	35.456
35.374	48.867	33.881	46.934	38.927	70.067	33.649	57.84	46.217	54.295	57.888	28.293	58.272	31.395	59.126	46.077	58.959	50.364
30.846	45.421	35.377	47.021	37.328	32.419	32.851	45.366	41.886	51.455	56.628	28.293	56.086	31.07	57.036	44.8	52.986	50.386
24.233	45.421	39.508	47.926	41.683	39.598	35.128	46.622	44.408	49.388	44.783	25.719	51.114	31.37	52.004	43.303	51.277	43.312
36.304	35.122	32.384	33.508	40.774	25.499	29.287	37.417	39.611	35.774	29.642	22.952	37.445	29.735	37.508	43.303	37.703	30.271
20.27	18.291	14.951	21.393	20.709	19.354	21.099	23.284	24.377	16.645	17.492	9.0322	23.249	14.969	22.244	22.79	20.649	15.981
34.735	36.362	29.528	37.748	31.789	28.842	34.459	37.831	38.435	35.83	36.34	20.293	43.324	25.025	39.324	32.011	32.183	34.318
36.492	38.386	29.462	43.652	47.444	41.025	36.475	46.609	51.519	43.363	36.66	21.668	43.324	32.7	40.583	32.983	37.81	34.625
36.492	47.891	41.53	52.175	52.909	35.343	44.47	52.239	49.926	56.825	42.431	30.642	49.623	32.6	45.035	36.242	50.682	38.594
25.47	38.867	31.426	33.482	33.668	35.343	35.878	31.752	33.528	26.917	36.649	29.471	36.408	30.275	31.579	33.273	34.14	32.966
20.629	32.725	27.882	31.396	29.196	54.998	28.888	31.942	36.379	28.147	29.306	25.499	35.168	26.185	37.499	39.787	33.621	33.257
17.073	42	36.131	39.193	32.65	30.585	39.623	44.188	49.932	35.464	34.354	25.443	47.466	29.323	44.586	33.293	40.769	36.48
36.521	42	36.131	39.193	41.976	27.382	38.416	44.886	49.932	33.457	38.054	31.951	47.466	41.543	44.586	33.293	40.561	36.48
42.504	61.351	61.464	58.558	53.578	54.332	58.586	53.331	54.884	50.589	53.865	43.026	61.982	44.545	59.02	52.304	66.539	52.942
21.055	28.372	22.656	26.621	28.548	21.838	23.054	30.745	25.475	20.132	42.014	16.402	35.196	16.244	36.549	25.918	33.891	42.447
37.553	35.366	30.957	32.37	30.396	27.675	36.985	34.605	32.644	29.894	42.014	25.247	46.805	28.517	41.212	34.965	41.561	53.431
28.4	62.894	53.496	53.414	57.236	49.043	54.594	56.891	58.411	42.925	63.466	39.805	73.879	38.652	71.021	54.796	64.069	53.431
18.245	43.442	46.488	41.941	45.315	36.071	41.491	42.226	47.31	37.89	52.103	35.353	47.915	43.108	46.135	40.41	47.346	56.142
84.898	43.442	46.206	45.408	42.279	34.247	41.491	42.226	48.158	35.132	45.507	38.718	47.915	46.754	43.535	46.169	40.863	47.382
25.371	56.5	48.161	52.893	67.641	45.303	45.868	50.361	55.703	35.057	57.155	41.865	57.78	38.689	46.87	59.032	48.472	44.535
18.682	56.5	48.677	52.893	54.813	49.696	51.482	52.47	59.252	39.685	60.5	52.524	57.78	39.205	49.037	58.17	48.472	47.624
21.037	43.574	34.327	51.681	39.492	66.605	36.973	47.887	47.405	34.548	43.815	29.622	49.867	29.616	55.165	33.093	51.744	41.344
23.213	29.424	21.453	44.909	34.491	43.205	23.079	46.414	35.93	30.345	22.052	20.229	22.73	23.778	23.786	38.731	19.212	35.861
26.013	55.636	50.382	52.617	49.568	55.097	46.677	56.425	55.998	45.742	57.178	34.73	58.921	28.304	65.755	48.546	50.646	58.591
23.257	46.254	37.911	42.353	39.008	38.038	38.824	42.713	45.485	28.151	49.825	34.779	41.126	38.706	44.634	42.789	41.591	56.664
41.437	37.542	47.19	41.14	36.815	23.691	35.943	42.713	43.857	28.151	35.708	34.267	38.247	25.869	39.055	29.789	36.367	33.592
33.284	46.404	42.606	46.11	33.394	38.624	45.249	49.082	43.367	36.816	39.078	35.85	48.229	29.496	44.673	39.125	44.462	41.481
33.589	51.368	42.166	46.11	37.811	51.519	45.249	54.714	49.431	45.177	50.9	41.877	60.216	45.162	53.927	41.119	62.809	55.081
28.915	33.206	26.327	30.544	32.603	51.519	35.673	41.753	33.901	37.01	24.393	34.069	39.526	28.465	33.203	25.593	35.019	32.114
22.927	68.368	52.28	65.225	54.105	48.839	64.554	61.421	61.021	49.515	58.653	47.636	75.696	46.486	67.732	57.617	68.042	48.412
29.528	55.38	51.22	56.329	43.832	47.066	57.389	56.14	50.826	45.056	50.122	36.07	66.873	40.147	63.701	35.502	57.533	48.629
20.133	40.065	30.976	42.301	37.835	47.214	35.04	38.72	43.101	30.647	34.606	22.264	49.88	26.849	39.232	35.502	40.015	38.952
19.584	57.437	51.611	56.834	45.96	42.12	57.92	55.11	50.072	45.277	52.75	35.17	56.571	40.602	52.025	51.913	52.7	55.985
16.329	36.458	34.907	38.247	37.445	38.747	37.693	33.34	42.581	29.023	33.728	22.931	41.054	31.543	35.724	25.601	35.874	28.563
33.196	29.505	29.395	29.098	24.988	43.104	29.591	29.319	33.713	29.023	34.209	21.048	35.244	24.125	33.355	32.817	33.282	34.798
30.934	57.409	54.06	50.592	51.247	38.411	56.189	52.942	51.157	37.573	62.813	37.473	69.542	38.18	56.824	54.69	57.202	51.779
24.522	42.445	34.002	34.627	32.816	27.563	46.072	39.402	30.129	30.864	44.016	28.251	48.791	28.83	41.314	46.351	43.048	45.274
35.226	29.505	27.381	31.22	25.99	24.103	24.561	31.828	37.087	34.612	31.64	23.316	33.52	25.001	34.826	36.426	29.281	31.426
31.831	40.491	25.462	36.937	33.742	40.684	26.855	36.215	44.91	42.232	40.842	25.073	46.8	28.72	46.821	47.149	41.431	49.066
16.011	25.679	22.476	31.418	20.85	28.253	22.166	31.553	27.115	25.431	26.244	17.348	25.83	28.677	27.248	27.602	25.087	24.401
25.874	42.853	30.691	43.355	33.13	32.711	35.268	46.807	41.955	41.544	44.336	23.953	46.326	28.677	46.922	31.806	47.777	38.879
28.236	28.246	23.352	31.329	21.342	24.21	21.977	33.325	30.157	30.378	28.491	17.283	33.013	18.158	34.344	26.591	34.984	26.875
39.616	53.935	38.677	64.364	51.451	51.173	39.592	54.044	43.944	41.505	54.495	29.057	57.656	35.747	53.537	45.054	47.949	55.429
33.972	46.483	36.922	45.531	36.083	32.78	39.291	43.513	48.605	37.008	43.86	23.692	50.703	27.003	48.6	45.054	44.256	39.768
39.253	41.362	31.757	45.516	36.083	35.015	36.445	46.098	42.619	38.717	50.17	21.061	46.98	29.773	47.987	37.619	50.563	41.359
35.575	41.362	28.994	46.558	26.943	35.126	33.785	48.192	40.178	42.597	50.38	20.96	46.98	28.285	43.1	36.617	48.626	41.01
45.849	44.67	43.539	53.083	53.271	33.24	46.454	50.054	52.61	39.645	37.9	26.998	51.612	24.814	44.301	32.114	53.433	38.519
18.785	27.876	27.839	25.522	31.714	16.768	24.828	22.691	38.052	20.27	28.616	15.795	30.43	22.276	32.878	26.409	29.352	25.651
13.246	24.481	20.049	23.796	23.659	21.452	20.088	26.072	28.651	21.92	25.256	12.95	28.531	15.84	28.45	20.226	29.074	22.174
36.818	43.198	32.598	39.411	30.672	32.594	36.001	47.246	44.366	35.958	39.781	22.951	42.257	26.864	43.709	31.398	45.141	37.995
16.331	28.734	21.328	27.27	26.048	24.714	25.048	30.967	28.843	24.61	28.986	18.889	35.403	21.67	33.646	25.735	30.226	31.052
10.697	19.728	14.835	27.27	18.98	44.157	16.543	20.637	24.196	21.965	15.227	11.311	20.194	19.431	20.749	19.168	18.784	15.012
43.342	65.043	55.642	72.681	51.818	67.344	59.895	70.603	77.485	62.948	62.633	38.392	71.711	41.729	67.738	53.343	62.737	56.9
16.286	31.7	24.43	33.54	28.043	41.058	26.682	37.242	35.791	32.903	30.283	18.78	36.915	24.339	31.257	30.042	30.646	30.417
25.702	44.094	38.203	49.59	50.798	39.106	33.027	42.852	46.045	38.076	46.928	28.872	52.744	29.527	50.683	41.632	45.181	49.313
42.588	37.413	39.965	36.163	26.862	41.463	39.049	38.759	45.194	26.94	31.514	24.238	44.776	24.725	41.454	28.77	38.588	29.788
37.652	47.085	48.753	50.562	41.453	37.543	44.559	49.346	50.004	40.177	43.099	31.515	53.796	24.877	45.557	30.536	47.898	30.36
49.13	57.534	51.819	57.327	50.807	54.918	58.309	61.202	53.64	52.113	60.979	38.012	66.533	42.382	63.46	49.453	65.516	51.973
21.621	40.09	32.344	39.893	27.308	29.721	32.128	40.508	39.132	32.67	38.62	32.412	38.885	29.468	44.054	34.314	44.183	37.377
24.767	21.466	22.971	30.471	20.44	28.532	24.474	21.705	24.445	15.417	24.341	15.65	21.647	16.96	22.998	24.352	20.138	21.051
15.368	37.198	37.288	37.885	26.561	38.751	30.646	28.796	37.466	24.205	40.303	27.041	35.82	31.514	30.215	45.494	31.033	40.389
24.775	42.801	30.092	44.968	34.311	37.076	38.331	49.131	38.724	41.778	44.732	27.041	51.091	31.308	44.831	35.964	44.954	44.494
15.113	27.361	21.973	29.586	24.361	23.381	25.81	30.108	29.991	24.299	27.502	17.464	34.509	21.428	32.109	26.507	26.948	25.545
15.494	29.072	28.341	31.284	36.997	23.551	25.81	28.491	45.249	24.033	29.024	18.022	31.089	18.599	24.098	25.617	24.248	24.45
36.608	37.996	36.573	50.723	39.274	33.308	29.006	45.323	42.288	38.953	35.152	28.136	44.529	23.782	42.763	43.817	42.475	28.855
41.165	37.996	36.573	55.092	31.077	33.965	29.006	45.323	42.288	41.435	35.152	21.919	44.529	23.273	42.763	31.661	42.475	28.391
25.187	29.373	25.744	36	23.914	32.833	26.908	28.617	29.199	21.483	29.721	17.688	30.903	18.717	30.785	22.87	28.597	26.602
22.407	56.325	48.47	53.711	47.501	56.756	52.039	58.613	57.652	57.618	49.226	32.206	61.324	36.297	58.099	45.644	58.591	50.914
39.119	36.454	27.546	45.637	37.938	40.389	33.428	53.291	46.462	40.022	35.69	12.688	44.097	13.957	46.286	26.324	43.018	28.158
18.702	31.633	32.689	31.414	27.998	31.559	36.287	36.008	40.975	29.625	32.443	23.476	42.031	21.668	39.25	27.002	34.702	29.817
22.964	22.078	24.448	20.388	15.695	22.284	15.064	23.507	28.68	19.344	25.713	14.498	28.674	16.727	29.304	23.476	28.092	29.817
16.457	19.46	22.067	21.256	15.837	24.103	16.656	25.932	25.958	25.172	17.637	9.7931	22.948	12.944	23.194	19.259	25.861	25.636
16.457	22.497	17.421	28.739	16.588	40.46	21.193	29.062	32.327	28.944	17.859	9.8286	26.24	11.678	23.516	10.48	24.704	14.425
18.579	27.987	25.926	31.504	26.143	24.222	26.376	31.798	31.368	24.875	25.95	17.038	30.436	19.361	27.8	23.091	30.665	23.415
23.989	30.114	23.731	35.635	23.158	24.222	26.415	32.037	30.276	24.875	28.25	17.038	34.657	19.361	30.385	21.274	37.062	25.272
16.471	25.684	23.138	27.991	19.627	19.263	24.884	25.28	26.169	22.656	23.954	15.123	29.181	26.278	28.193	21.274	25.326	25.272
40.873	21.511	23.138	26.692	19.627	15.226	26.117	24.82	23.433	22.656	17.996	11.897	23.681	15.117	24.053	19.089	31.132	17.952
42.594	38.15	38.464	41.391	41.465	49.494	34.357	35.594	34.612	32.954	31.454	35.833	42.395	50.798	39.831	39.596	36.461	39.786
20.34	40.846	38.469	38.357	38.017	47.072	37.713	36.448	38.709	34.636	40.574	31.25	45.188	31.386	47.349	38.387	43.436	38.058
28.634	81.358	70.188	79.871	64.106	81.455	66.997	77.459	76.309	68.7	68.565	49.403	83.566	55.054	88.574	83.194	74.846	74.849
15.153	50.4	40.603	40.825	38.801	48.59	36.768	44.717	38.298	44.825	47.949	41.285	51.091	38.365	47.853	41	50.588	51.835
19.888	53.855	47.379	50.376	48.732	38.637	48.181	48.417	51.644	41.186	52.801	41.285	58.749	35.013	54.577	54.97	54.732	51.835
45.731	72.621	57.412	66.989	57.883	59.933	54.075	77.954	63.972	66.425	75.05	37.358	87.254	63.421	88.068	55.939	90.663	62.533
33.889	58.566	48.485	63.323	49.017	59.933	54.075	73.751	63.972	66.001	52.498	37.358	71.649	41.626	72.145	46.278	71.721	61.498
84.609	117.71	92.492	129.58	89.197	99.023	104.08	117.04	119.79	110.19	105.37	69.669	114.58	91.566	114.62	92.084	114.85	105.41
44.852	117.71	97.773	131.28	103.81	111.53	110.85	140.34	119.79	127.84	101.89	69.669	110.67	73.341	98.905	92.084	114.49	103.85
45.198	114.25	104.75	124.98	103.81	88.442	110.85	126.23	108.72	119.88	107.64	89.399	105.07	72.645	99.682	91.704	114.49	100.11
75.973	99.608	104.11	114.61	91.557	85.842	103.67	110.21	104.6	103.27	92.931	96.27	104.35	89.185	105.94	91.704	99.891	100.11
76.301	85.35	99.851	103.62	87.943	88.578	90.433	101.72	99.782	117.27	89.588	113.89	76.92	110.62	71.041	92.099	79.266	87.977
151.81	174.29	157.42	169.51	156.98	157.8	154.27	161.38	176.89	167.59	181.2	146.47	177.31	155.95	173.1	159.7	178.84	169.17
127.98	101.82	120.51	126.44	125.56	125.76	127.8	119.05	126.46	117	113.1	88.789	112.54	89.45	117.1	101.58	115.84	103.36
180.2	146.75	197.38	142.39	196.54	149.27	187.49	147.12	174.76	125.78	141.64	162.95	126	150.8	117.1	153.27	115.84	153.66
151.06	143.51	143.05	150.91	126.56	115.32	131.58	154.76	147.68	136.07	144.82	133.21	156.36	131.51	152.32	133.7	138.85	137.75
50.704	80.537	63.817	100.47	87.753	108.09	82.684	84.617	89.592	125.43	72.467	70.821	67.392	59.691	64.273	62.475	63.095	76.561
164.01	146.91	141.77	156.47	124.25	144.33	149.32	150.54	145.23	137.62	145.19	156.5	119.54	165.45	107.57	172.78	99.089	153.24
154.97	115.64	149.82	142.99	151.27	182.57	160.76	132.21	146.22	126.19	127.37	120.02	110.19	122.44	101.15	125.92	104.34	110.32
126.34	109.39	149.54	142.99	145.57	182.07	130.78	121.16	131.82	96.371	111.5	142.44	96.295	128.98	101.02	127.21	75.471	115.74
126.34	106.37	128.74	118.1	131.81	102.49	130.78	89.947	115.08	86.502	109.23	107.37	96.357	109.13	92.312	97.826	90.664	115.74
82.071	94.001	103.58	101.69	101.97	119.77	92.173	105.12	99.698	110.96	91.066	92.994	90.199	105.98	87.761	96.341	80.022	98.729
113.29	112.67	114.58	109.46	120.34	128.72	107.19	123.85	113.52	169.84	108.37	152.57	115.14	122.4	108.54	107.75	107.47	112.16
163.86	114.17	127.88	114.15	127.55	202.05	135.6	125.19	123.71	126.53	116.44	140.77	115.14	108.29	108.54	134.93	137.12	130.28
72.371	106.18	105.76	100.79	153.28	228.5	95.631	107.8	103.25	75.155	100.39	84.062	93.142	88.076	80.968	109.61	70.95	98.998
54.511	96.484	88.288	100.79	119.78	195.94	126.76	99.357	100.13	104.22	84.457	65.838	88.87	71.757	78.901	87.249	70.95	83.474
133.41	97.155	108.41	102.52	111.36	108.47	120.66	70.377	118.58	106.03	120.66	116.98	102.67	118.37	93.682	127.26	76.878	129.32
115.72	66.858	57.378	80.704	71.667	71.507	58.576	79.186	67.706	109.27	72.174	66.281	67.133	79.434	63.143	74.529	78.913	74.665
173.85	180.39	203.57	152.87	183.39	164.83	175.18	158.02	169.42	117.27	170.76	201.74	159.05	189.95	160.24	197.71	152.11	182.46
105.2	101.27	120.44	86.143	115.86	67.652	105.13	84.629	104.57	80.632	111.01	94.363	90.919	92.502	80.462	95.45	98.087	106.59
120.14	80.025	75.979	77.531	80.385	69.78	82.512	83.147	76.842	106.91	90.283	90.948	87.786	85.414	88.344	97.066	102.31	87.841
135.96	95.29	113.75	86.684	108.67	125.22	86.178	90.05	87.944	110.65	90.03	139.61	87.85	135.62	94.171	100.07	102.36	90.831
162.12	118.12	159.57	108.18	136.99	125.22	130.89	97.789	110.48	79.118	115.78	152.95	104.48	135.62	99.094	129.83	100.47	119.53
114.71	132.42	115.33	154.99	135.9	164.47	143.34	148.71	141	123.79	126.24	80.132	122.83	90.745	105.85	102.05	87.536	114.8
144.63	188.87	182.03	162.62	174.75	141.79	181.75	179.63	188.68	157.87	185.43	155.5	174.18	170.63	167.91	168.15	167.21	192.4
91.038	132.05	148.79	132.23	140.49	127.62	131.32	129.76	134.52	129.7	116.66	130.59	123.93	126.55	134.37	126.29	167.21	119.84
91.038	88.184	85.809	89.625	86.134	113.57	91.03	97.409	86.058	129.7	84.352	105.18	86.08	108.91	91.356	106.02	116.16	83.927
169.82	145.01	151.83	155.33	140.84	115.8	153.02	153.5	164.57	153.28	152.97	153.53	173.23	148.81	166.91	146.15	155.98	156.34
179.27	110.49	101.66	112.57	84.083	85.999	93.585	115.41	103.58	137.87	124.33	105.05	123.57	118.2	113.87	106.17	129.57	122.46
183.24	85.141	87.572	94.999	71.76	70.517	79.175	90.111	86.626	107.63	101.56	94.928	88.129	114.39	97.603	101.33	133.72	90.114
131.56	147.96	173.44	119.07	141.36	147.22	134.08	121.56	134.58	120.1	146.42	182.12	140.63	168.48	138.4	170.63	133.72	161.09
202.2	160.63	173.44	144.84	141.36	105.52	142.24	136.34	152.5	154.02	192.87	190.56	184.49	194.14	186.87	181.07	180.71	205.53
160.89	99.513	119.91	80.38	100.21	133.29	92.016	71.692	87.422	120.71	108.29	102.44	92.232	108.91	95.219	91.62	96.109	108.44
159.69	111.61	113.63	141.33	118.31	133.58	133.5	135.38	135.26	143.44	112.32	103.46	105.44	117.98	109.91	105.24	114.18	109.31
124.75	122.35	130.6	133.87	122.33	114.43	126.23	145.27	126.59	161.29	108.51	101.49	114.65	97.106	118.95	115.92	133.2	107.24
136.58	103.48	82.663	73.164	74.113	59.358	69.58	76.48	79.046	75.715	102.65	91.161	112.51	92.089	117.14	99.824	161.01	104.48
80.182	67.204	73.114	54.097	71.789	58.277	68.806	50.572	58.209	57.084	69.434	80.814	74.927	72.385	80.202	65.036	95.316	70.239
70.236	98.501	89.499	73.895	84.312	120.77	84.393	78.106	74.069	84.359	104.3	88.239	104.85	90.577	94.892	97.591	115.25	104.43
134.95	77.754	90.492	72.078	91.088	169.6	100.44	79.648	80.974	122.58	92.389	87.146	78.88	85.977	78.096	82.941	86.253	98.399
189.95	186.66	211.71	186.95	204.18	143.99	185.55	184.63	184.69	216.33	156.28	195.1	153.02	181.56	150.14	167.39	162.46	157.81
152.32	229.76	215.07	237.91	192.01	194.7	209.25	235.74	225.21	239.03	223.42	210.2	206.44	214.17	199.58	214.67	214.47	218.17
192.19	186.5	170.29	223.65	175.52	165.35	202.97	231.8	217.04	215.37	163.24	107.02	189.15	123.45	180.81	142.62	184.41	154.26
108.58	87.693	86.726	75.721	80.302	69.754	80.767	82.291	74.177	105.65	98.584	97.792	91.819	94.376	90.442	90.843	90.511	96.174
188.38	150.6	161.2	138.18	151.9	136.39	142.76	127.9	143.22	127.64	150.6	157.42	148.38	151.39	142.38	147.25	132.8	166.29
150.7	150.6	137.07	138.18	130.83	145.28	142.76	127.9	143.22	127.64	142.9	142.34	144.28	145.66	135.32	144.08	132.8	150.3
101.11	153.8	150.74	148.3	149.23	126.45	144.37	138.91	141.67	103.25	152.03	144.22	161.07	139.14	170.74	139.91	162.8	152.53
42.661	92.75	79.265	84.23	69.462	153.24	80.642	93.222	84.389	76.447	86.696	64.419	94.31	73.542	87.344	80.207	80.369	76.307
63.456	67.056	77.035	88.187	81.183	97.753	83.084	106.09	82.027	122.6	69.127	46.461	71.821	51.631	79.111	52.574	101.52	67.637
85.735	141.1	142.26	142.26	142.31	141.16	143.09	144.67	143.37	149.97	102.5	120.24	126.06	112.28	144.64	105.23	172.23	105.83
136.2	114.54	138.56	83.593	125.97	92.277	150.93	95.488	122.31	122.67	119.27	120.24	118.46	112.28	77.68	126.8	91.213	138.44
133.09	71.043	68.951	82.066	56.842	95.932	68.713	85.681	82.859	107.22	65.331	58.583	93.479	62.426	76.894	62.681	102.19	65.095
81.361	117.41	100.77	120.17	112.75	143.46	121.01	115.39	122.9	142.49	121.42	96.118	137.76	108.37	137.12	116.66	152.3	115.67
107.98	117.41	116.06	130.42	111.63	129.19	134.4	113.58	130.69	119.96	121.42	136.81	119.14	136.26	109.45	116.76	95.968	115.67
221.66	149.28	201.23	166.03	199.37	104.65	211.21	115.23	188.83	98.821	140.85	178.29	123	165.08	108.03	169.22	86.318	153.35
224.47	226.46	205.69	193.31	205.17	142.23	219.82	163.03	219.04	134.55	229.41	208.75	201.85	217.02	175.94	221.72	156.21	222.6
183.3	181.12	202.28	185.26	189.37	164.82	199.72	170.74	184.91	145	168.19	184.06	174.79	169.09	163.56	160.33	181.12	157.31
195.05	135.54	198.03	162.76	189.37	110.14	197.59	138.69	175.82	138.01	133.33	167.05	111.31	160.45	94.696	153.02	77.726	143.47
165.82	102.56	108.22	115.07	126.2	92.727	111.07	105.03	102.72	94.52	103.67	128.48	85.242	117.4	72.558	102.66	62.847	105.38
155.24	87.275	92.953	97.174	91.161	130.67	96.446	105.25	92.224	120.34	113.62	99.49	103.33	113.68	105.05	116.01	112.36	118.35
155.24	116.69	125.1	109.44	118.83	96.877	123.11	102.13	124.19	96.738	123.63	132.29	118.48	143.01	118.89	139.86	99.977	130.93
161.56	97.483	85.524	98.344	101.44	101.79	94.634	116.41	92.399	106.64	105.98	114.44	105.15	124.79	104.44	125.62	91.156	120.26
228.66	130.35	169.6	133.69	164.99	104.34	154.65	122.85	145.62	100.37	125.87	166.03	94.718	162.06	84.996	166.07	91.156	141.51
272.33	247.4	228.26	232.13	231.99	219.76	250.15	188.9	230.82	149.76	245.75	192.54	231.04	194.09	202.63	216.54	158.42	229.92
221.27	133.85	139.33	169.83	155.07	128.78	161.88	174.68	157.34	173.4	129.82	136.45	125.32	128.71	119.37	132.57	135.68	128.95
164.06	98.908	115.73	104.46	116.56	114.9	114.93	119.26	110.91	112.08	94.219	92.143	102.49	92.641	110.1	91.828	135.68	94.649
138.59	81.67	95.534	97.62	91.592	82.167	99.701	97.833	94.481	112.08	91.198	80.244	80.899	79.828	76.185	82.231	108.8	90.996
138.59	91.08	110.95	83.659	93.705	61.337	92.186	76.464	84.648	72.013	103.16	116.91	80.899	123.72	76.185	117.31	67.859	112.27
169.59	107.88	123.77	104.6	108.3	168	109.27	93.408	108.71	78.245	103.16	103.71	96.782	94.752	89.148	100.62	81.161	107.22
100.98	120.65	128.81	160.98	145.96	116.1	153.91	125.74	160.49	90.924	109.71	101.65	100.23	97.222	89.148	100.62	79.161	107.22
100.98	79.674	111.33	77.59	82.743	56.957	99.224	89.635	72.15	109.35	93.98	93.576	85.192	97.222	90.777	87.818	87.555	93.55
99.277	109.61	101.03	115.4	96.25	86.398	115.55	104.29	114	97.512	103.5	107.15	113.5	105.05	104.66	111.96	102.89	102.3
145.27	178.56	180.5	160.81	156.24	120.43	152.02	161.41	160.42	148.59	174.77	177.98	178.01	168.9	194.45	163.88	195.33	167.49
181.18	160.47	147.85	156.7	140.36	163.63	139.36	151.72	144.82	139.39	174.68	156.31	160.59	161.25	143.92	166.36	129.63	180.3
208.28	132.99	139.5	122.82	110.73	125.82	106.27	141.3	116.87	165.57	120.66	162.4	143.19	138.5	145.45	128.21	183.07	130.39
163.11	104.35	104.58	89.775	82.527	133.01	77.163	91.746	87.894	110.96	111.78	134.32	122.06	130.06	128.85	111.76	133.18	114.7
163.29	86.303	91.427	88.687	82.272	73.536	81.353	92.352	87.955	90.47	92.815	97.937	75.593	89.885	74.643	84.485	64.058	88.602
106.31	93.66	96.729	87.422	82.272	95.786	81.353	90.566	87.2	99.738	94.989	148.61	101.69	132.22	98.639	122.1	97.63	109.05
107.33	98.695	105.26	120.62	94.275	95.786	111.62	122.68	106.03	137.4	87.525	80.363	110.74	82.927	106.12	80.429	110.72	87.561
89.012	98.695	105.57	86.417	105.9	246.6	91.245	87.516	78.622	101.32	113.81	131.94	107.02	127.46	97.959	123.03	98.064	119.16
87.273	93.345	106.84	86.417	105.9	133.43	97.861	87.516	88.323	110.66	113.81	131.94	91.304	127.46	88.236	123.03	86.929	119.16
165.43	132.65	144.46	111.83	138.44	81.335	147.24	85.81	123.83	80.225	153.24	152.97	129.2	145.29	147.11	146.88	144.03	156.53
176.84	246	298.69	201.47	255.7	138.97	244.44	179.85	214.78	140.04	229.94	241.77	202.99	262.96	199.29	235.57	207.83	219.18
219.93	186.71	168.11	183.71	155.58	202.02	160.87	224.65	165.04	202.53	161.76	156.14	168.62	127.28	157.41	159.02	145.2	155.67
182.61	186.71	168.11	183.71	155.58	145.39	160.87	206.75	164.72	217.23	158.82	181.42	175.81	166.41	172.38	159	194.12	155.78
182.61	127.82	152.54	121.21	126.88	115.59	121.75	124.12	123.88	152.51	126.91	139.1	117.96	128.27	121.51	137.31	137.84	120.84
134.29	103.51	109.96	95.398	89.903	94.1	94.51	103.95	86.811	84.922	99.514	146.14	90.115	140.22	87.571	107.53	81.311	103.46
178.56	183.96	210.93	167	187.06	226.42	176.08	184.16	165.12	158.73	163.06	222.32	168.89	211.38	164.31	211.08	145.31	184.31
113.72	114.2	118.95	130.17	152.73	110.55	151.31	108.55	137.98	129.38	100.96	102.25	109.17	88.785	98.249	91.662	100.58	94.969
162.76	106.66	110.92	98.394	100.66	98.481	101.8	115.01	93.374	132.91	107.68	155.21	139.73	130.48	158.97	118.43	163.23	118.19
302.15	245.45	292.48	206.68	267.58	167.21	226.79	182.99	219.15	160.35	249.56	280.45	252.06	267.96	251.69	271.11	236.84	250.68
262.64	141.25	199.78	151.79	181.3	110.15	183.6	114.32	163.04	89.392	138.07	180.69	134.55	169.66	134.81	171.56	130.75	153.8
143.55	86.837	101.26	97.716	89.075	94.285	96.623	91.345	94.161	94.564	83.437	93.813	91.651	79.501	101.38	82.759	87.381	88.918
110	86.162	108.72	76.833	89.075	74.521	94.807	82.97	83.234	93.262	80.567	124.74	78.106	119.94	70.238	104.36	74.08	90.857
203.08	77.094	92.352	70.344	75.2	48.407	87.718	63.333	70.674	81.088	78.498	143.15	74.41	129.69	68.005	107.01	65.166	90.857
136.84	111.46	137.32	101.6	147.1	91.555	131.57	80.11	117.23	67.802	113.37	149.32	91.095	155.1	81.031	138.63	79.895	127.77
177.03	200.97	178.19	156.87	155.58	149.03	150.72	161.88	159.52	194.04	184.31	248.95	168.71	236.78	167.3	208.48	177.71	200.27
137.39	170.46	171.63	152.38	149.35	127.81	150.72	148.16	156.35	144.89	154.3	161.87	154.04	162.86	169.31	159.35	190.44	155.61
165.63	93.24	112.94	104.16	101.42	201.31	111.53	100.58	100.72	144.89	94.397	132.06	71.568	125.26	70.145	116.74	68.004	91.959
251.74	184.52	211.78	167.98	190.31	146.95	188.28	141.12	181.26	106.89	168.98	185.63	152.22	186.36	140.83	183.88	125.33	171.03
251.74	145.39	157.45	145.13	157.52	170	154.46	118.25	146.21	121.79	131.97	137.91	121.01	129.28	119.68	140.54	117.94	141.68
155.25	95.125	101.32	104.33	98.211	67.013	100.04	96.521	99.218	81.688	102.39	110.78	92.378	98.188	84.475	107.07	75.028	111.78
121.77	160.6	131.84	144.31	119.13	124.33	130.82	167.69	135.98	158.3	147.81	148.91	176.16	139.92	192.53	151.75	218.45	143.14
115.16	119.84	125.76	122.42	116.96	100.74	130.82	124.09	127.52	142.97	104.68	97.192	135.83	98.784	133.69	98.058	124.81	98.665
129.25	121.38	119.39	114.24	101.93	101	106.7	124.9	118.57	125.96	119.83	123.26	117.42	118.11	122.77	114.94	111.34	119.21
255.28	199.15	233.38	161.04	186.99	125.79	176.46	141.69	178.06	150.75	201.09	252.65	175.02	249.44	168.29	231.78	168.66	212.25
211.59	197.43	183.63	165.5	174.28	191.27	172.77	186.78	168.15	201.59	189.74	179.89	192.96	180.61	185.09	173.73	205.63	176.79
195.91	54.251	73.672	57.844	60.101	168.44	50.327	53.088	48.444	104.78	66.52	99.609	50.067	99.191	53.926	88.235	67.355	79.366
95.103	116.23	93.709	98.263	93.719	164.41	88.512	106.78	90.901	114.4	120.37	120.46	106.88	124.55	108.06	117.49	111.98	110.57
81.223	102.42	86.102	97.064	93.719	134.16	88.512	105.51	90.901	109.63	100.94	95.747	105.76	104.07	105.56	100.35	120.34	105.28
123.16	82.999	97.474	86.835	100.12	65.887	97.486	80.945	96.037	76.898	77.907	86.472	81.159	85.977	74.344	82.889	79.631	78.045
158.42	112.93	120.52	111.8	114.56	104.51	116.71	100.46	115.27	100.33	114.02	133.57	115.28	143.49	106.16	134.18	104.9	118.04
172.41	123.25	138.64	139.65	134.77	97.076	148.67	133.13	139.01	145.56	120.03	141.71	129.51	134.34	150.45	114.42	160.05	123.82
212.66	182.01	204.4	172.41	180.85	119.63	184.95	156.7	177.1	151.51	148.86	193.63	149.38	171.12	140.17	153.58	123.69	144.81
195.41	176.45	176.63	168.28	156.11	117.56	172.11	149.33	175.74	138.32	190.1	233.16	145.21	228.43	134.97	214.19	120.7	206.14
134.84	181.2	184.3	166.95	159.39	117.11	172.92	149.27	158.84	149.24	191.23	223.52	188.83	208.87	188.73	209.67	170.48	192.53
198.63	168.68	168.56	142.51	138.75	93.455	146.76	125.25	142.79	104.7	175.65	180.01	156.27	164.63	164.21	180.17	170.48	170.13
88.873	89.386	71.277	92.027	77.903	143.08	83.756	81.976	88.3	53.94	92.178	67.437	104.38	63.177	104	71.37	87.298	81.708
131.1	195.76	216.31	191.86	196.17	176.71	200.16	187.06	200.34	163.23	171.6	194.11	181.51	181.06	194.3	184.42	216.49	191.18
223.12	270.55	256.76	290.48	240.38	202.98	269.3	278.07	280.47	225.85	244.8	245.53	239.14	256.69	241.98	248.67	259.42	255.66
333.42	270.55	277.48	233.57	245.63	154.43	255.41	203.23	239.9	176.23	242.44	285.99	234.19	282.16	229.77	287.01	220.04	258.25
164.49	133.3	158.04	124.92	138.17	106.04	147.66	120.47	130.13	118.16	122.46	147.52	109.01	140.19	114.36	135.31	130.58	131.18
157.22	162.08	160.51	159.63	160.91	135.78	175.08	149.66	163.94	199.31	124.87	139.66	136.94	132.21	144.42	135.31	160.3	126.54
181.94	102.58	113.74	104.28	98.246	99.986	106.72	111.8	108.84	95.573	110.75	114.88	96.515	106.12	101.27	111.33	93.859	119.28
101.33	80.83	71.365	68.191	80.323	91.909	80.757	69.068	64.939	94.427	82.494	80.492	83.618	78.491	98.312	73.374	101.87	73.506
101.33	84.885	114.78	73.74	104.34	66.485	91.474	76.299	72.047	67.544	96.584	125.71	80.806	121.98	83.368	114.91	96.306	99.655
93.026	67.58	69.374	70.238	72.749	48.813	73.108	76.75	64.165	76.835	60.583	63.201	63.876	51.587	69.417	62.432	59.864	56.899
223	148.94	181.81	164.88	176.69	154.74	191.57	131.83	176.73	94.722	140.16	113.35	135.17	120.76	125.15	130.77	117.15	144.07
101.33	104.96	83.364	115.32	103.85	92.076	116.56	126.88	108.26	127.31	92.687	87.965	114.03	78.269	116.82	85.676	118.74	83.931
101.33	48.092	58.175	63.696	77.395	86.353	67.651	76.842	57.152	86.798	50.263	43.412	43.197	45.016	40.382	42.039	38.396	43.982
87.633	130.72	113.77	97.075	118.68	119.39	107.19	76.243	107.96	56.823	154.45	124.95	104.57	117.05	98.351	132.96	92.969	138.45
157.97	130.72	157.26	121.88	169.5	173.55	138.31	106.96	123.11	94.394	136.55	138.57	104.57	132.19	98.351	135.28	89.881	141.03
66.65	76.504	84.154	63.427	71.234	72.237	64.518	69.702	64.132	77.387	95.434	90.231	87.607	104.22	93.318	89.004	96.893	93.546
120.31	95.142	143.71	104.33	119.15	143.86	123.63	89.039	113.81	87.44	89.392	97.568	76.43	95.422	70.513	89.129	80.473	87.33
80.395	59.852	46.804	46.989	38.203	44.943	40.264	51.276	42.452	63.128	70.228	64.616	69.351	67.124	69.193	68.932	84.241	65.706
54.462	56.449	45.302	43.771	39.086	41.976	34.976	43.505	43.756	39.062	67.657	44.196	55.612	51.533	56.009	55.487	57.426	68.988
45.258	22.237	16.749	18.626	16.604	13.037	18.028	19.226	19.457	34.619	29.818	18.782	23.778	24.094	22.581	21.532	28.541	27.811
36.795	19.913	17.024	21.595	15.969	20.277	15.85	20.661	20.382	38.675	22.636	15.506	22.071	15.894	22.827	24.061	32.098	21.401
29.821	17.854	19.014	17.015	17.703	14.923	20.966	19.552	19.125	19.733	18.684	20.457	19.134	16.173	22.827	17.494	27.914	21.38
35.643	20.285	15.537	21.031	19.948	23.864	16.634	20.317	19.935	17.055	24.864	14.86	25.765	17.309	22.458	20.297	24.435	22.916
29.643	29.001	23.961	31.785	22.4	23.091	28.382	33.089	33.259	26.473	34.596	17.065	36.022	20.17	36.148	25.312	32.385	27.841
23.937	25.338	23.855	27.247	24.557	21.226	22.52	24.236	27.554	21.25	26.033	12.77	30.75	16.493	33.152	21.252	35.717	23.574
35.084	18.109	19.096	17.343	17.29	15.791	19.672	16.927	18.617	15.179	18.586	17.21	21.674	19.518	24.609	21.02	24.821	17.527
32.753	19.337	19.496	19.291	17.29	13.497	19.672	17.751	20.414	13.53	23.949	17.21	21.385	19.518	20.583	22.744	21.501	19.45
31.474	30.631	29.632	30.071	27.619	20.045	29.274	29.946	29.297	22.911	34.179	21.283	36.492	23.336	34.363	34.242	33.443	33.829
30.675	35.226	26.661	32.746	21.51	23.254	26.278	33.88	29.948	25.537	35.862	25.785	39.015	24.983	41.96	34.104	36.44	33.807
18.387	26.856	28.191	26.35	20.225	17.462	29.582	27.694	25.213	23.119	25.423	20.404	32.139	22.344	30.127	26.065	28.975	29.06
17.36	24.434	25.928	24.47	21.995	16.688	28.022	21.618	25.315	16.446	27.729	19.356	30.355	21.005	26.034	21.193	27.634	29.06
15.891	18.577	17.343	18.698	20.728	12.038	18.302	13.976	18.858	10.239	18.236	15.951	16.664	18.198	19.757	17.451	18.968	19.068
21.606	21.849	22.744	24.559	22.764	16.302	24.173	23.791	23.631	23.296	18.836	16.808	20.768	18.676	24.106	23.213	26.661	19.068
28.592	22.994	18.6	22.763	18.998	18.661	17.574	21.466	26.105	22.128	23.486	19.23	28.079	20.306	29.535	24.209	29.896	22.19
32.579	30.531	23.103	32.18	25.073	22.931	25.248	27.597	29.37	29.531	37.892	22.798	38.526	23.11	35.667	30.69	32.149	33.283
15.368	28.562	22.209	28.009	19.743	18.579	22.876	24.239	25.342	28.837	32.974	21.113	32.766	22.046	29.507	27.29	25.388	29.049
26.714	15.416	18.184	16.088	16.724	9.2486	18.063	12.822	20.517	11.169	15.682	16.148	11.585	15.371	10.796	17.678	11.175	15.682
24.09	19.321	15.567	18.466	15.024	11.282	14.996	15.815	18.647	19.066	19.439	12.355	21.097	15.069	21.263	16.157	24.101	15.206
22.782	29.47	25.943	28.725	22.126	21.494	25.403	28.404	30.893	25.391	37.211	22.435	36.838	25.499	35.556	30.924	32.097	35.596
20.471	24.439	23.7	21.231	18.64	15.302	22.231	18.931	20.207	17.902	24.518	21.34	29.639	22.687	25.657	23.178	26.587	30.279
14.65	23.39	23.7	21.111	18.64	17.513	23.706	18.581	18.378	13.915	23.094	19.741	28.077	21.527	25.657	23.178	25.345	25.496
19.034	37.188	27.369	34.128	28.268	24.582	27.555	36.111	32.653	26.901	47.827	25.791	44.079	28.309	45.74	40.279	36.585	37.523
30.135	25.568	24.216	26.381	21.007	18.735	21.714	28.42	25.107	25.438	28.281	16.661	27.843	19.977	25.264	24.623	26.035	26.794
31.289	13.262	13.43	14.636	14.599	9.267	12.828	13.463	14.264	18.167	16.281	11.11	14.152	13.286	15.64	18.005	19.51	16.934
19.043	26.219	20.432	27.248	22.069	21.682	25.019	29.756	23.874	28.039	28.657	13.217	32.579	14.92	32.926	22.85	38.62	25.627
19.745	31.688	22.714	30.975	23.934	23.749	25.019	32.171	30.02	31.246	32.607	23.876	36.646	22.389	32.504	24.508	32.615	32.801
19.688	31.688	23.099	26.172	21.566	20.955	19.862	26.594	28.267	22.292	32.607	20.975	36.646	23.92	30.049	24.194	32.072	36.014
26.51	20.039	23.838	19.778	17.582	20.955	24.553	20.444	18.25	13.811	21.134	15.251	21.014	16.777	20.775	15.228	25.956	20.479
24.811	40.357	46.397	36.214	43.726	29.045	48.439	34.368	39.815	33.242	36.897	33.002	39.256	29.313	36.554	35.506	39.335	45.047
36.839	38.023	33.145	38.621	25.968	32.16	31.649	41.716	40.72	32.458	38.327	24.635	42.94	25.718	43.879	32.637	42.163	35.234
40.643	43.735	38.367	42.869	35.645	32.292	42.794	42.829	44.772	34.464	46.134	28.363	52.985	33.367	46.751	37.287	42.163	44.885
22.071	36.908	25.537	39.814	25.264	29.72	28.752	41.282	34.952	34.464	36.199	18.418	45.815	24.667	44.52	29.051	41.856	34.869
38.875	35.892	31.761	38.472	27.518	22.219	30.407	41.107	33.035	42.517	36.702	27.148	47.19	31.603	47.816	29.501	49.741	40.231
34.988	32.405	22.889	23.721	21.483	23.069	22.037	26.551	24.514	25.698	37.333	33.574	34.52	39.752	33.23	36.691	32.495	32.399
36.6	44.537	47.358	51.008	59.361	49.469	56.199	54.853	61.183	55.612	39.634	55.693	47.805	54.529	47.969	41.414	52.092	41.084
71.682	44.537	42.44	51.008	43.506	49.469	45.301	54.853	53.945	56.043	52.659	55.693	53.143	54.529	56.589	43.288	66.774	44.133
71.683	87.054	88.859	100.34	75.27	76.604	76.214	87.713	90.711	81.99	76.086	84.82	83.668	73.159	85.425	67.778	77.252	75.357
34.269	88.419	88.859	109.52	108.21	96.294	110.38	126.71	109.83	135.08	76.086	81.484	83.668	73.159	85.425	70.509	88.486	78.367
165.89	77.352	64.462	80.614	65.075	79.746	64.283	116	75.929	135.08	97.858	100.23	76.505	102.83	73.988	103.51	88.486	109.77
118.6	58.671	70.311	69.105	80.517	66.073	75.053	76.87	74.001	116.92	62.125	83.961	69.777	92.692	68.848	71.012	80.256	66.341
152.79	121.89	147.27	137.54	154.28	157.58	137.96	120.9	129.03	114.25	108.72	108.8	112.99	106.65	116.29	105.87	124.18	98.478
174.62	128.1	149.86	144.51	153.12	131.87	166.32	118.9	159.87	85.275	131.39	126.82	127.75	126.88	119.48	124.49	109.52	126.35
114.93	132	136.58	119.49	139.66	112.6	136.79	111.7	126.25	103.95	144.65	149.73	138.6	150.46	152.38	133.23	158.39	141.42
88.399	139.01	140.15	119.49	148.32	130.45	134.7	114.6	132.95	100.44	133	146.46	141.05	137.28	144.59	115.24	158.39	136.44
42.281	67.788	52.223	60.358	51.772	94.395	52.513	57.24	54.904	76.163	64.147	45.983	72.458	41.971	68.393	48.663	74.568	52.23
125.52	186.76	171.73	187.11	166.4	163.4	169.23	208.51	186.89	202.87	188.32	128.47	200.93	122.29	194.57	159.68	187.02	177.28
148.4	76.691	97.208	86.269	100.35	168.34	103.63	84.394	90.283	110.15	56.157	57.821	69.013	56.566	64.23	60.214	85.823	55.655
147.64	79.709	97.208	86.269	100.35	74.015	102.92	68.316	88.829	76.926	87.506	76.38	74.531	68.594	80.188	81.404	85.823	84.151
77.879	67.775	62.446	75.998	63.336	98.856	64.38	73.514	75.187	96.17	61.646	70.554	68.742	67.929	68.705	60.225	84.396	56.093
130.78	140.83	151.17	125.92	143.82	94.675	127.63	119.55	134.67	94.881	133.41	142.32	119.64	140.72	114.16	134.99	102.66	136.93
57.628	90.316	68.676	89.278	82.17	213.81	76.304	91.871	86.019	62.454	84.092	55.345	89.958	70.683	81.407	71.459	74.412	74.278
49.777	51.884	42.918	55.294	43.434	63.791	44.611	61.259	44.465	62.367	44.586	33.602	53.214	37.074	51.309	41.094	51.259	39.462
74.71	81.137	73.828	85.286	64.274	104.04	72.134	94.099	83.18	123.85	80.903	70.073	82.094	75.035	75.389	81.496	81.895	81.846
169.63	91.253	111	78.821	96.011	84.246	98.601	70.734	84.764	69.203	91.533	97.682	78.569	107.06	76.406	105.34	83.812	99.02
175.94	112.11	135.57	104.24	140.95	86.532	123.13	89.698	123.56	78.719	132.34	122.63	130.64	123.79	115.57	124.49	99.861	131.7
100.61	96.297	99.556	112.59	102.1	86.331	107.1	115.03	112.03	119.37	96.625	87.017	109.13	82.787	103.54	77.736	121.43	88.782
44.858	92.526	83.872	76.373	106.5	86.331	90.057	73.211	85.57	76.408	85.765	74.39	97.215	76.125	100.65	74.776	101.72	79.587
52.243	73.397	73.053	88.926	84.857	131.01	83.417	102.85	86.222	128.79	63.425	69.944	66.805	69.476	66.598	64.835	68.843	64.216
93.085	92.686	98.635	100.25	100.38	92.103	100.99	98.766	101.16	106.44	85.324	132.98	81.557	111.25	82.83	84.774	84.731	79.735
103.37	96.038	98.635	93.613	118.64	121.19	113.57	100.75	103.68	99.557	94.696	122.22	95.02	102.85	95.911	88.068	105.62	86.173
134.65	107.07	125.41	100.98	129.83	123.8	120.61	129.5	103.78	157.86	98.62	121.05	120.4	100.07	126.82	102.99	155.73	96.239
223.42	170.62	198.35	140.69	194.11	123.8	170.08	162.68	141.38	204.95	185.39	214.12	171.62	218.08	171.26	212.77	179.67	192.4
223.42	121.8	132.29	105.69	147.7	93.399	119.61	120.47	118.56	138.92	131.26	182.51	108.39	165.73	107.67	158.49	110.46	139.88
154.33	178.85	161.65	174.25	151.94	162.76	171.33	160.1	180.6	131.21	171.74	144.17	151.61	139.01	155.04	150.49	159.82	164.48
140.68	178.85	161.65	174.47	151.94	179.55	171.33	169.87	165.28	184.93	171.74	173.58	170.32	173.13	167.04	150.49	150.03	164.48
126.56	156.18	168.13	124.79	149.68	112.92	156.38	112.35	137.09	106.32	169.3	196.32	152.39	173.91	141.19	176.82	135.11	171.64
173.42	162.28	185.5	170.19	160.7	189.03	172.53	167.81	157.75	176.74	180.92	205.05	152.39	205.46	148.52	194.84	160.4	198.39
169.93	146	149.46	130.71	152.54	94.09	160.3	136.01	135.57	143.65	145.29	167.77	133.95	172.84	138.07	153.31	134.99	146.06
169.93	146.75	164.37	120.11	150.18	71.702	143.59	106.12	130.35	106.01	141.02	202.07	138.97	180.88	144.52	167.05	150.84	156.39
155.82	142.72	148.94	139.24	140.51	101.32	145.66	133.73	140.94	127.06	133.15	123.97	135.77	124.32	124.73	122.52	125.91	135.78
167.48	127.71	150.42	148.94	140.05	99.407	149.86	133.73	145.04	114.22	119.03	134.12	128.53	138.74	124.69	136.86	113.2	129.74
91.871	110.83	145.21	92.88	128.77	94.863	119.16	79.928	102.5	87.609	113.16	147.79	102.31	138.74	93.469	129.16	95.99	124.93
88.089	79.754	76.605	83.74	91.856	122.44	84.898	75.953	88.708	85.011	83.49	95.547	75.191	99.904	72.199	89.902	68.017	78.273
103.86	79.754	89.604	87.909	94.635	76.396	101.95	64.774	93.179	91.311	78.027	87.293	72.372	93.549	62.538	91.816	62.172	82.869
111.83	130.72	121.67	141	117.23	95.807	128.24	141.74	131.95	132.4	132.35	146.45	124.36	151.2	124.74	135.94	125.36	131.21
145.86	127.56	127.61	136.94	110.57	129.21	122.84	150.27	127.07	140.64	120.06	113.52	145.36	112.62	149.58	117.52	153.9	117.22
244.98	155.04	172.7	136.94	150	109.21	136.07	135	127.07	145.51	175.74	225.14	145.36	217.23	161.15	209.22	172.39	193.62
268.37	214.83	225.79	180.63	193.55	156.94	172.67	172.9	169.77	140.03	193.05	225.65	211.17	217.23	229.76	226.97	221.67	193.62
206.22	88.004	101.54	79.664	92.033	71.077	94.477	78.088	79.366	106.46	98.62	123.32	81.516	118.35	90.403	115.7	118.68	106.44
182.01	166.96	183.95	147.18	156.68	111.45	162.43	153.49	155.62	155.14	159.2	190.67	173.19	166.64	187.27	151.47	159.91	151.77
100.35	97.602	108.49	129.53	94.472	136.05	90.503	152.74	103.27	159.17	119.08	123.02	117.72	103.97	119.07	111.5	137.94	108.33
114.36	94.467	64.296	81.288	68.569	78.884	83.671	84.85	83.646	76.154	98.077	86.524	94.671	80.772	98.054	83.234	99.465	96.861
109.57	64.46	65.951	75.441	78.469	76.906	71.115	79.152	68.178	76.913	58.468	86.524	54.632	82.701	52.851	81.993	61.089	65.985
159.62	127.14	149.07	108.53	121.25	107.98	126.99	96.248	105.71	84.151	119.83	152.14	108.95	159.53	101.83	144.17	90.205	127.86
133.88	142.58	163.88	121.67	152.97	88.81	147.75	116.46	132.69	103.33	138.94	167.28	128.99	155.01	116.17	155.29	104.29	149.33
137.85	129.16	141.99	123.43	143.23	111.43	143.16	112.46	128.21	120.66	124.69	163.52	116.61	145.96	116.17	146.22	111.05	131.48
132.05	83.138	101.95	86.496	98.894	84.191	101.12	74.988	93.098	100.14	81.854	99.728	78.72	92.332	76.615	87.685	74.633	84.865
162.22	104.3	105.57	114.62	109.74	188.72	110.2	104.37	118.66	110.73	94.471	82.589	91.338	78.197	81.678	98.645	93.614	98.042
83.956	83.668	91.406	79.381	95.005	153.49	84.671	72.186	78.812	64.416	77.696	82.517	69.24	84.632	61.682	90.284	56.347	78.521
146.55	101.07	139.4	99.338	176.48	132.72	146.3	87.059	115.34	70.512	87.522	119.23	79.367	114.34	84.925	101.28	77.252	101.47
122.81	108.06	126.73	103.3	122.17	81.91	126.55	94.459	105.8	90.283	101.01	149.91	86.501	128.18	84.925	114.09	94.258	110.47
135.84	139.56	145.75	127.34	142.21	104.02	150.21	103.37	138.77	128.28	137.54	170.79	129.5	162.63	129.83	132.27	107.69	139.58
315.19	254.15	257.72	227.4	238.98	157.61	229.44	218.02	229.98	184.16	264.31	287.01	228.89	278.35	207.84	253.93	180.69	259.33
267.89	253.2	254.45	198.46	245.6	151.32	216.3	194	207.92	182.23	242.43	296.32	236.08	268.36	245.19	261.51	253.94	253.46
197.19	163.1	173.65	152.21	167.53	149.81	159.74	153.69	158.67	162.24	165.42	160.78	177.67	167.49	165.33	152.67	177.84	155.23
118.2	163.1	168.16	150.86	139.89	113.26	147.21	148.55	146.25	109.73	159.85	142.64	175.29	141.64	163.21	152.67	126.55	148.32
157.31	178.21	169.87	173.24	151.54	135.9	164.72	166.49	168.57	164.78	198.2	204.11	175.07	191.98	174.37	189.49	191.74	187.39
131.83	127.71	111.57	127.49	118.32	123.41	110.01	134.92	127.03	148.15	122.33	128.37	110.76	138.63	111.21	125.41	115.65	122.59
293.41	185.07	227.54	150.01	180.5	114.3	168.17	128.51	162.29	110.87	191.11	222.01	157.39	202.33	156.19	207.3	140.34	201.78
180.8	165.7	198.05	160.37	180.64	109.79	172.1	148.41	167.63	110.87	182.73	220.5	166.94	201.63	163.16	197.24	140.34	182.7
99.037	65.672	87.263	90.533	128.19	116.12	111.51	84.259	97.45	91.677	70.069	65.197	81.251	68.371	74.701	65.928	85.673	63.223
85.141	91.971	110.06	95.702	116.47	228.2	121.92	102.41	108.59	107.33	80.698	82.067	85.587	86.18	84.221	76.184	82.807	79.031
52.379	74.073	68.463	90.569	104.41	120.17	93.686	102.41	91.446	123.22	53.09	59.033	72.796	59.061	74.285	64.61	90.705	52.884
210.66	145.67	169.44	179.64	186.01	135.87	205.35	148.06	186.65	129.58	123.79	107.78	128.5	108.42	121.71	122.41	115.78	122.36
209.94	274.62	294.01	231.91	268.14	151.01	280.34	198.71	256.73	174.29	257.76	280.28	230.26	260.31	243.85	251.6	254.87	267.95
223.19	150.51	204.89	147.96	175.49	152.01	161.59	170.06	154.11	173.73	160.47	189	147.74	173.59	144.41	176.78	149.95	163.69
231.77	173.33	184.88	175.28	214.03	159.17	177.83	170.06	169.84	183.62	185.48	218.72	157.68	223.52	149.16	214.51	156.79	196.33
228.35	144.16	159.51	103.56	113.48	188.36	112.92	111.73	116.74	106.42	151.63	169.92	151.19	157.56	172.08	157.35	173.05	163.04
140.12	84.078	102	100.76	86.204	111.31	95.916	98.093	98.225	114.15	73.223	93.871	76.687	91.992	88.687	81.331	124.88	76.192
145.83	57.975	56.558	68.773	55.132	158.11	59.906	93.208	61.618	143.27	55.395	79.235	73.757	82.765	88.687	62.349	116.61	60.511
132.27	137.61	136.05	117.22	132	126.58	128.26	103.09	121.99	91.909	130.81	125	127.27	131.87	122.56	136.15	133.01	118.85
186.82	159.34	193.41	149.43	173.33	177.92	181.61	145.33	157.37	169.26	150.01	161.31	151.03	152.51	138.87	157.6	120.72	145.29
267.87	159.34	193.41	149.43	173.33	121.61	181.61	125.17	157.37	108.99	164	191.24	139.02	183.2	112.61	178.74	67.331	173.75
193.29	66.078	87.992	57.882	78.569	54.206	65.206	56.704	59.612	70.405	68.983	99.904	58.542	109.85	53.231	80.889	53.497	72.58
156.23	97.235	100.92	92.191	100.98	75.964	98.266	81.791	96.114	85.084	105.87	136.55	83.024	132.63	74.226	124.27	70.199	114.79
96.445	97.204	101.24	106.18	103.83	98.56	117.74	102.47	104.56	137.14	101.77	113.64	94.651	114.29	91.682	103.69	83.532	97.655
157.93	244.14	249.62	219.06	218.24	188.11	221.19	231.04	223.76	202.45	228.54	231.37	220.31	242.21	239.43	236.3	227.24	233.96
177.71	209.58	228.5	219.6	211.31	158.23	232.53	216.34	229.27	197.83	181.84	245.93	172.89	217.7	170.04	214.53	198.82	197.83
157.37	245.01	233.59	219.6	215.55	167.77	232.53	216.34	229.27	214.05	242.55	224.69	247.16	218.76	252.1	216.03	217.79	227.36
157.37	146.65	161.94	115.5	146.67	100.74	127.62	117.38	126.77	109.76	148.3	190.84	137.47	174.9	139.97	157.39	135.42	151.89
191.32	131.92	137.79	110.26	131.05	111.84	122.94	114.91	109.81	114.34	134.66	182.89	128.08	165.63	127.01	151.15	127.66	137.83
163.8	114.22	100.86	107.95	102.54	106.69	107.24	114.91	105.78	112.51	134.66	99.89	128.08	98.021	127.01	113.15	127.66	124.95
121.3	87.295	99.994	73.317	94.087	106.69	86.558	75.832	78.285	92.62	88.236	125.09	71.39	112.06	65.114	110.62	58.064	93.764
105.35	73.21	100.17	70.265	83.314	171.84	87.054	57.369	74.399	66.807	66.954	120.97	56.644	99.99	54.256	83.643	61.755	74.573
160.81	101.65	121.97	79.931	114.73	65.274	103.8	80.321	93.347	81.041	124.64	118.55	112.15	116.24	111.37	121.88	99.085	124.66
93.138	105.97	129.63	108.01	124.41	93.33	129.67	81.313	133.46	93.341	95.505	113.36	91.811	121.48	89.868	115.34	85.804	103.41
109.92	98.226	101.97	92.725	103.88	66.559	106.59	78.402	100.77	72.788	89.175	111.12	86.376	104	78.875	103.17	76.994	95.825
190.38	240.12	234.08	267.72	238.06	268.35	260.45	253.33	256.6	207.64	194.57	204.95	202.35	191.63	200.54	203.19	199.38	187.68
255.42	313.06	306.03	287.48	283.39	268.35	295.37	256.13	292.82	207.64	311.83	323.05	314.67	318.91	308.69	335.95	281.73	301.59
146.43	114.39	121.78	101.2	114.83	172.16	105.54	96.929	101.33	110.8	123.6	131.4	126.13	119.09	143.05	99.845	131.5	108.91
158.89	94.518	88.234	108.72	89.286	117.9	98.468	110.43	100.31	131.56	84.942	92.716	95.518	117.49	110.45	83.779	150.84	86.608
199.62	137.88	115.14	129.32	122.67	131.85	142.22	142.87	132.57	154.51	113	103.72	136.02	130.7	138.9	113.38	150.84	103.54
153.21	107.8	118.58	97.691	120.4	89.309	127.41	88.29	115.88	88.208	109.06	107.08	96.314	115.48	88.434	111.63	87.804	101.83
127.42	121.23	140.67	127.45	132.63	110.98	131.95	156.17	116.42	189.15	134.69	159.55	122.14	166.63	134.38	154.91	157.91	149.89
116.33	99.748	103.79	100.79	105.57	86.962	111.69	105.67	106.7	136.27	91.87	111.64	85.96	91.237	83.659	111.23	106.88	100.52
147.21	84.455	94.952	97.194	99.432	78.916	96.057	93.468	91.891	103.66	91.87	96.088	72.204	105.82	79.59	94.3	103.28	96.521
186.94	122.91	148.36	109.7	123.42	145.34	112.86	116.59	106.64	152.39	108.56	143.12	112.85	133.68	121.87	118.82	121.36	112.17
173.55	177.39	187.02	146.4	164.46	157.69	151.76	147.72	166.75	134.71	153.68	164.92	153.81	155.13	156.82	146.55	158.72	153.43
153.39	170.7	209.45	139.92	177.67	157.69	176.33	146.86	153.95	134.71	198.1	241.42	148.5	243.18	148.13	220.72	149.31	215.85
179.64	147.7	159.31	139.92	147.73	123.59	157.53	146.86	140.76	149.31	133.65	184.84	145.63	166.09	148.13	174.48	144.32	154.61
246.62	157.81	175.56	138.38	165.47	111.28	146.12	118.7	141.22	97.692	156.5	207.03	158.95	166.09	150.64	174.48	139.86	154.61
88.192	91.574	83.185	87.827	78.114	123.47	88.284	108.78	88.758	75.289	80.946	55.272	101.31	66.747	89.016	78.48	91.066	78.629
134.52	103.9	123.63	126.13	119.06	123.47	133.86	134.82	125.38	125.12	99.805	104.1	106.93	94.821	110.75	97.573	116.38	93.084
220.85	181.35	182.34	145.99	162.41	106.58	161.79	167.99	149.2	162.86	179.89	182.5	182.16	176.75	194.77	169.21	188.79	171.72
216.58	145.4	141.57	157.28	144.23	143.64	151.5	149.01	157.27	172.6	150.82	143.52	138.9	146.2	128.08	153.13	104.53	156.5
160.16	121.79	115.83	123	127.08	136	128.01	136.13	131.24	172.6	125.66	96.791	128.53	104.08	128.02	100.2	114.12	112.74
191.47	125.1	140.04	123	136.31	109.48	128.01	115.64	131.24	100.62	136.1	164.47	128.53	142.88	128.02	151.33	121.65	148.22
115.65	96.062	92.765	127.33	98.383	120.25	119.57	150.76	122.49	143.65	78.271	91.747	106.95	84.462	110.66	73.679	126.93	68.428
80.781	92.782	86.185	93.317	106.96	98.057	108.71	123.02	99.718	131.14	82.489	91.747	84.506	84.462	88.587	75.328	110.43	76.668
127.72	110.11	98.008	103.95	106.96	128.05	101.68	110.56	108.3	137.53	102.99	116.15	120.92	101.75	130.28	121.63	142.5	103.67
168.73	117.08	97.513	112.03	108.67	152.13	102.79	121.46	108.3	137.53	106.01	116.32	110.4	108.5	115.88	108.67	110.79	103.67
135.69	118.67	120.43	124.62	111.09	87.4	111.82	124.31	124.48	123.25	117.49	121.44	107.35	114.53	97.069	108.67	91.804	113.08
160.37	183.04	195.94	133.75	184.78	93.397	174.25	103.03	160.79	79.379	181.02	225.29	150.24	224.5	139.57	206.54	107.5	185.87
113.7	156.91	138.75	124.52	117.61	100.98	116.73	133.4	117.29	123.92	159.73	182.94	145.87	185.23	145.35	166.91	118.26	166.82
80.217	116.71	124.26	104.18	128.99	169.78	129.33	96.094	116.25	111.4	105.65	106.29	117.24	104.76	118.44	107.2	107.4	95.497
152.75	125.79	135.42	99.733	134.77	78.232	144.03	96.944	115.78	119.2	115.68	116.21	102.46	111.5	99.569	111.8	109.29	117.34
164.38	114.86	111.5	99.733	130.4	111.01	118.09	88.242	115.78	85.531	104.05	103.35	122.13	98.489	123.66	105.47	127.45	97.99
95.624	100.77	103.31	106.03	93.119	89.387	98.962	104.98	103.21	99.02	94.049	78.759	103.95	85.207	104.6	87.035	115.47	90.712
135.05	77.529	89.359	78.417	87.209	172.27	80.276	58.332	83.008	54.258	93.121	89.745	82.082	96.488	76.259	90.331	74.089	93.804
192.4	173.67	199.54	152.36	191.47	154.48	167.89	151.65	153.12	146.14	170.39	188.53	186.75	169.64	205.94	172.04	218.22	164.07
368.22	207.87	232.86	160.89	190.76	108.34	173.7	151.65	163.99	127.66	234.89	254.56	226.62	245.34	246.08	243.94	236.42	231.62
249.4	221.33	215.7	187.3	195.56	136.33	203.88	185.25	190.98	159.48	245.97	243.27	212.2	234.69	204.11	239.65	168.31	234.07
172.64	149.59	174.51	151.89	149.54	137.37	158.55	150.96	156.1	136.02	149.75	207.38	117.59	192.25	111.64	185.91	115.01	161.52
172.64	164.59	170.79	140.27	150.03	137.38	135.93	174.89	136.15	188.83	128.7	115.02	184.9	117.27	205.19	124.44	249.64	113.79
188.14	172.57	197.87	140.01	169.1	92.678	167.96	150.38	156.88	164.82	159.41	205.47	183.24	184.67	171.08	177.77	189.96	168.31
116.9	86.86	97.754	98.691	92.954	81.378	103.74	89.812	91.822	102.5	77.556	69.353	87.009	86.534	87.733	81.934	90.519	84.205
109.57	67.377	74.819	59.696	80.915	76.366	65.044	62.285	61.404	66.865	64.366	93.377	61.879	86.536	66.478	78.697	68.624	72.721
82.284	60.821	38.952	59.042	82.287	109.23	72.955	67.225	72.27	90.903	56.236	46.405	62.568	46.314	65.062	41.714	73.55	45.394
169.98	68.068	92.246	59.042	84.927	60.408	72.955	52.832	72.27	57.843	83.802	79.765	86.408	81.144	82.27	86.928	77.448	80.069
92.068	120.27	93.945	95.236	70.604	94.139	74.797	73.232	89.533	85.557	125.15	132.69	95.556	148.96	92.038	119.9	88.237	130.98
92.068	92.658	97.344	55.953	75.905	61.834	64.322	50.019	64.998	47.084	115.35	122.95	82.127	132.97	72.083	129.72	68.214	123.37
103.78	92.658	81.227	70.237	61.972	53.02	64.907	70.466	70.486	75.635	115.35	115.39	88.989	118.04	84.39	129.72	88.325	123.37
61.606	61.899	63.429	51.578	51.666	35.12	51.585	43.889	55.739	31.698	77.23	65.278	68.415	61.811	72.15	72.011	69.228	72.893
34.239	32.982	36.667	27.434	25.609	20.561	33.205	28.309	31.782	22.551	37.358	28.101	33.713	39.073	30.46	34.698	28.031	34.551
44.749	18.012	15.053	18.47	15.365	18.276	15.583	20.75	20.264	16.714	20.077	13.391	24.558	19.636	26.808	17.038	25.142	20.322
80.117	36.314	34.559	29.345	25.28	43.804	35.82	34.303	35.914	24.51	38.25	34.784	36.853	30.508	33.285	40.319	36.946	37.185
64.547	31.361	29.518	34.021	27.375	55.665	36.532	33.88	35.914	26.564	27.124	24.954	36.342	22.275	32.13	27.83	32.476	25.201
37.024	26.514	24.426	33.277	23.005	25.754	25.011	30.818	32.641	26.564	32.076	16.611	36.222	18.284	35.944	25.455	33.072	28.094
24.543	22.456	18.619	19.2	19.828	15.509	16.19	22.811	17.9	22.356	25.806	18.45	31.632	19.816	28.732	22.409	33.663	22.232
58.332	26.426	23.079	26.178	23.364	14.707	20.039	25.026	23.278	18.314	26.048	19.166	28.323	24.214	29.876	23.028	26.305	26.083
32.716	22.345	19.493	19.084	18.154	24.832	17.98	21.002	18.172	17.105	22.981	14.798	25.332	19.386	23.869	25.972	23.152	25.944
16.296	24.548	21.762	21.661	23.98	17.185	20.923	21.159	23.734	17.105	24.677	21.138	24.818	22.11	24.868	26.597	24.11	25.944
25.584	26.658	22.014	23.048	20.533	19.685	21.864	23.125	24.86	15.36	27.687	21.07	30.394	24.185	27.827	28.378	23.715	26.723
28.483	30.749	26.69	24.731	25.116	23.453	21.864	25.368	28.635	21.727	34.726	21.07	34.122	25.055	34.437	32.64	31.576	31.112
19.811	22.249	20.368	22.197	18.489	14.657	20.065	22.077	24.337	16.592	28.196	16.304	27.132	19.138	27.434	23.119	26.864	22.255
43.784	25.857	18.617	22.753	16.874	31.011	19.261	24.183	22.654	20.787	30.687	18.02	34.107	19.928	33.255	25.389	33.626	27.695
33.656	43.127	40.424	40.419	35.853	30.17	38.738	42.579	40.022	34.219	38.743	35.285	45.575	34.997	47.019	38.622	49.154	40.669
30.695	24.556	23.66	23.256	20.424	22.626	21.552	21.698	24.702	14.595	21.77	23.058	22.831	24.392	20.551	28.012	20.899	23.317
33.224	19.057	20.239	15.189	16.15	45.692	14.928	15.228	17.673	11.518	21.77	19.006	22.831	20.959	18.965	23.003	20.899	23.317
35.189	41.402	34.692	34.741	32.223	46.129	29.771	31.019	36.586	26.664	49.115	33.066	45.58	37.371	44.172	50.985	38.384	48.207
51.407	53.987	49.811	46.138	46.673	59.225	49.109	49.403	42.807	36.655	50.367	35.621	57.773	40.908	52.989	47.395	50.785	47.796
20.311	30.345	20.986	30.112	21.715	32.352	22.637	35.079	30.191	28.356	31.957	15.2	41.345	20.978	36.701	23.359	39.799	28.34
23.675	34.085	28.149	36.628	26.994	34.557	32.255	43.115	32.991	43.897	34.438	22.061	36.99	27.965	35.719	34.183	37.388	31.819
33.59	38.061	24.753	43.09	22.333	39.029	25.694	51.73	36.204	44.139	40.08	41.162	45.827	46.86	49.492	43.866	53.514	41.166
49.888	49.663	34.801	51.063	29.676	42.624	35.807	49.672	47.394	44.46	54.245	35.026	54.742	39.245	51.713	47.419	58.843	53.188
35.425	40.631	31.139	43.494	29.644	38.882	31.248	44.535	35.802	51.975	40.403	24.014	45.913	33.73	40.977	40.73	48.725	38.095
74.866	71.048	77.184	62.495	60.878	50	57.161	62.203	64	46.212	75.907	84.055	56.52	82.659	57.568	79.756	58.391	77.856
77.324	49.992	50.767	57.028	50.536	51.163	46.383	53.451	59.561	65.585	59.17	64.881	53.562	72.85	57.568	62.501	58.392	61.188
70.448	47.14	37.334	54.049	45.656	49.33	42.373	50.097	52.131	67.095	49.373	58.492	50.556	58.13	44.974	56.938	45.476	57.968
99.096	70.972	65.157	87.992	61.862	74.578	73.545	84.925	78.63	75.451	68.218	71.582	70.954	70.521	69.619	69.391	64.808	67.562
68.552	43.776	65.12	57.61	73.758	37.638	62.886	36.91	61.127	43.688	56.82	76.564	38.785	84.602	44.388	72.102	60.336	59.764
106.95	118.83	128.46	109.45	138.24	86.618	128.52	90.115	136.39	85.826	122.36	109.77	102.87	105.43	109.92	105.74	110.25	121.72
132.16	151.72	160.82	155.54	153.33	113.63	154.03	147.99	154.34	133.37	141.05	161.34	142.6	162.02	140.26	154.71	143.62	146.06
132.16	110.53	130.44	143.47	109.94	118.66	114.85	131.96	136.94	172.43	105.64	91.588	123.29	95.21	135.84	83.922	143.62	96.952
228.69	224.25	225.68	175.51	203.36	150.02	186.29	178.5	187.79	182.89	214.8	235.42	214.08	235.01	217.83	213.89	237.96	214.05
82.127	74.922	80.379	106.42	83.11	110.95	91.895	109.08	91.957	116.42	66.96	82.878	72.379	82.429	72.208	69.909	78.778	69.439
74.78	119.57	112.95	153.65	116.64	154.59	142.52	156.42	146.81	147.54	101.98	112.85	116.43	116.71	97.473	114.24	106.32	101.9
53.269	71.493	93.347	89.588	95.685	78.994	86.09	90.323	83.981	86.356	71.71	61.802	75.466	59.792	74.569	75.075	77.469	72.705
75.615	86.315	104.61	89.747	109.82	95.838	102.98	78.492	94.4	83.592	78.002	78.286	75.324	83.346	68.307	84.339	68.098	79.105
94.976	71.683	81.194	77.702	101.5	99.841	86.955	74.921	82.251	84.265	77.586	75.118	62.653	82.48	57.712	84.339	53.778	74.637
105.87	62.001	64.097	77.857	78.192	116.82	81.734	90.089	82.251	105.89	53.305	53.902	55.696	63.599	60.061	60.838	91.692	53.884
167.5	115.55	130.19	88.144	135.83	183.76	123.03	75.889	113.95	86.111	135.26	151.79	116.08	150.56	111.72	144.4	84.892	137.25
153.13	123.69	161.73	108.57	128.53	97.416	123.03	84.201	118.45	81.518	146.94	189.59	116.08	177.79	124.04	167.95	127.13	157.28
115.35	142	148.5	129.37	136.81	154.34	141.26	115.77	134.68	91.67	137.03	170.67	137.63	148.15	129.61	143.34	114.23	130.13
120.01	86.826	117.45	90.152	107.6	104.13	100.67	85.388	87.994	90.662	87.581	138.57	77.474	124.9	84.09	122.82	95.024	96.846
111.83	82.434	98.169	70.47	95.151	79.481	85.257	69.385	72.627	75.196	86.181	112.85	71.116	118.2	67.509	101.15	70.059	90.187
112.27	62.643	79.746	56.507	71.49	68.829	69.776	52.888	59.32	74.751	62.8	81.995	60.134	79.271	58.186	77.368	75.495	76.327
140.41	119.47	111.24	132.18	117.69	137.77	120.27	151.9	116.33	169.56	127.63	115.13	149.72	112.12	148.43	100.78	171.29	116.91
126.19	110.95	91.148	104.41	108.7	190.59	103.16	128.58	101.32	149.48	107.07	92.488	121.27	112.12	119.66	100.78	119.83	107.16
84.391	104.99	140.35	100.58	135.13	152.45	127.59	128.58	110.01	100.6	94.905	123.19	89.606	119.8	88.686	115.15	102.06	101.52
97.748	154.91	160.15	155.08	141.48	141.77	167.91	138.7	147.49	140.2	176.6	197.21	174.94	160.75	156.68	170.71	148.6	180.14
111.07	168.28	140.94	146.18	131.9	112.86	141.84	161.71	144.98	167.5	150.54	141.22	158.13	140.23	162.13	144.34	166.88	143.4
101.35	134.13	112.12	135.05	115.25	147.67	116.01	151.67	129.35	143.47	134.15	129.77	120.47	127.88	126.92	135.15	132.7	143.4
101.35	101.24	99.247	108.61	116.51	165.79	109.23	110.75	114.84	119.75	79.043	70.738	86.886	80.281	93.508	66.44	105.14	74.087
132.18	114.2	122.99	142.33	147.37	196.67	135.19	133.52	132.01	132.34	145.48	137.5	122.03	145.96	128.9	140.25	116.3	144.93
112.42	148.71	133.27	129.1	119.56	178.66	126.36	136.05	137.96	156.33	155.87	171.11	164.12	155.2	168.22	140.25	174.59	147.18
140.23	178.57	166.44	189.07	234.84	182.04	190.43	148.88	189.45	143.59	132.25	159.09	144.09	158.19	153.72	136.87	166.73	124.83
199.55	124.67	120.1	122.15	140.58	206.45	111.87	122.91	128.2	143.59	137.39	158.42	133.32	132.09	133.22	122.86	128.73	126.35
199.55	197.41	208.2	174.01	168.16	136.76	180.11	166.7	164.96	151.58	217.33	227.34	193.97	230.72	192.45	215.2	193.64	215.63
190.5	120.89	143.17	116.65	123.29	122.79	128.38	105.75	129.45	102.75	96.466	126.87	96.433	120.91	91.959	115.02	116.08	98.924
134.51	108.43	109.78	117.09	111.49	182.53	120.82	107.97	114.11	107.3	114.84	104.2	114.42	146.03	109.57	112.85	102.57	127.26
109.08	108.55	111.35	114.34	120.72	178.47	122.95	107.97	111.17	97.549	113.33	114.51	82.168	125.86	71.908	110.95	66.861	121.15
237.05	129.71	176.32	108.62	133.19	89.262	120.22	107.15	115.64	104.74	128.45	149.85	120.86	144.78	132.14	140.3	142.35	136.52
132.31	162.98	198.28	140.7	182.98	155.68	186.83	142.88	144.67	171.74	158.48	201.08	154.48	196.13	136.08	208.04	137.22	168.43
219.94	163.14	219.09	136.12	194.56	155.25	175.21	156.45	151.47	173.17	170.34	220.44	154.11	212.91	164.21	195.93	165.67	188.91
157.48	195.43	219.04	143.41	196.14	185.65	185.11	148.58	153.5	171.44	196.92	226.23	186.16	207.79	199.35	203.41	210.74	186.94
178.41	99.643	101.68	96.445	109.12	104.56	96.445	109.16	99.706	108	93.449	108.07	105.07	101.41	100.2	107.22	90.751	100.22
154.84	99.643	101.68	96.445	109.12	111.07	96.445	115.23	110.5	139.95	97.274	108.07	131.96	88.703	141.65	88.027	162.75	100.22
94.844	63.672	74.699	69.085	84.099	66.803	82.166	55.736	69.787	53.364	51.804	78.43	44.307	81.896	46.027	66.102	47.695	51.655
126.51	66.911	69.279	66.975	61.855	73.344	74.22	60.906	68.588	78.71	68.79	89.627	59.632	84.425	58.528	78.308	60.172	69.206
126.51	109.27	113.41	90.593	103.02	106.54	96.216	96.072	95.043	103.3	92.572	107.51	112.24	112.98	113.39	103.69	117.03	103.08
75.999	95.617	117.56	91.278	130.16	79.595	116.25	76.66	97.581	84.561	92.572	99.484	81.465	95.964	82.075	92.668	71.34	89.431
90.403	56.503	44.799	48.369	59.724	49.545	56.485	47.779	53.016	64.917	53.595	76.055	59.689	76.381	61.304	59.801	64.762	51.861
162.82	118.97	156.22	96.473	147.86	87.173	138.33	104.23	110.11	132.14	125.66	179.93	103.86	154.62	105.23	142.13	107.28	131.92
249.99	263.05	299.08	235.43	267.62	151.73	273.9	197.18	246.86	166.87	287.55	291.51	240.14	262.72	233.8	264.61	199.45	268.49
210.97	157.63	167.81	150.03	169.65	210.58	197.79	173.88	155.25	126.92	140.61	140.83	147.88	127.77	152.88	133.32	176.11	139.29
95.477	157.63	167.81	148.05	169.65	298.75	197.79	173.88	155.25	126.92	126.86	140.83	137.03	127.77	148.24	125.06	176.11	111.94
103.8	218.92	203.81	207.43	195.5	184.2	199.72	199.95	203.67	201.51	192.22	222.72	202.73	199.65	207.4	186.79	206.17	193.97
301.71	283.03	305.72	258.26	260.8	184.2	265.63	248.62	265.98	236.62	252.98	281.85	253.48	265.05	255.08	266.85	244.53	243.47
289.27	272.67	262.4	258.26	245.22	167.73	251.69	248.62	258.45	209.95	266.37	268.01	253.48	265.05	253.11	262.86	231.1	260.87
176.52	119.2	120.32	116.71	115.49	127.78	112.6	126.68	111.1	145.09	136.29	116.6	115.03	143.23	124.09	132.97	129.02	136.77
87.501	101.8	103.06	116.71	103.7	85.566	99.892	111.53	107.56	118.42	104.39	85.944	112.48	94.154	124.09	84.061	126.43	91.799
87.501	107.16	107.74	121.54	104.8	131.76	125.98	115.92	123.71	118.42	106.36	94.879	105.82	100.62	100.94	94.153	92.58	95.242
57.267	55.977	48.526	61.827	53.748	78.967	52.833	76.818	53.398	112.77	66.572	76.544	64.753	83.164	67.792	73.932	81.55	68.26
122.61	101.63	115.39	99.482	102.67	90.706	106.51	91.936	106.9	109.24	99.627	121.09	83.468	128.27	82.456	104.98	81.55	106.23
155.87	128.09	126.32	109.83	155.44	145	131.6	119.97	113.4	136.52	120.95	136.8	134.19	133.28	143.29	122.6	153.74	118.44
95.926	135.69	128.78	151.62	120.22	132.61	137.28	175.53	140	188.42	130.59	127.74	150.55	119.6	166.43	111.53	170.8	112.67
71.289	76.423	86.174	90.339	93.617	86.828	98.685	75.28	92.826	68.445	60.637	66.518	65.45	59.784	68.325	61.455	74.598	61.428
71.289	79.768	77.291	89.381	85.079	151.96	82.87	89.601	85.188	95.014	62.46	83.079	71.5	88.341	78.217	63.083	84.742	61.428
154.15	140.29	143.07	122.89	118.32	102.69	124.67	111.02	133.67	94.703	153.55	170.76	142.31	171.24	125.41	161.39	96.837	158.35
173.18	124.18	127.47	85.225	99.9	107.03	92.619	88.912	92.353	80.497	164.51	170.76	135.62	179.32	120.24	165.29	94.593	172.27
354.88	178.9	178.44	142	149.99	107.51	150.11	156.65	139.61	155	188.38	242.38	177.69	238.59	181.06	221.97	199.26	205.99
262.51	264.23	218.11	207.22	210.94	172.42	220.8	206.77	222.25	194.19	251.67	256.55	264.13	241.21	260.03	244.4	248.65	251.17
275.42	301.2	306.27	296.81	281.77	239.16	306.52	260.46	305.42	234.57	240.75	234.45	258.07	228.23	251.95	236.05	235.17	235.8
284.62	257.83	275.34	234.3	232.54	165.77	228.69	213.58	244.51	194.95	233.78	295.42	227.77	258.41	233.49	236.05	231.97	235.8
257.84	192.58	242.68	187.57	237.58	156.73	225.19	177.82	196.86	164.39	197.01	229.64	159.83	226.25	149.23	212.72	153.44	198.14
190.11	186.58	160.99	173.71	183.19	173.61	159.56	183.72	164.15	183.65	202.3	191.31	230.39	174.42	253.47	170.56	249.88	189.58
212.51	203.19	173.13	209.64	164.34	292.89	182.96	239.11	184.85	218.35	182.28	191.31	201.38	174.42	214.28	170.56	224.66	181.53
162.93	106.62	106.19	122.08	102.9	122.73	105.99	154.41	107.89	192.27	92.787	90.105	110.99	83.945	136.36	83.986	182.84	82.233
93.911	77.653	64.044	91.829	85.483	79.897	78.104	104.57	92.574	119.44	78.165	77.005	80.722	70.03	91.021	64.15	98.382	65.591
126.7	94.103	80.727	91.829	76.62	88.259	79.049	112.81	84.197	146.93	106.94	112.66	114.75	112.61	118.69	108.56	122.57	109.67
118.18	96.853	94.361	135.22	89.6	98.406	106.86	149.61	113.34	154.46	71.996	73.51	95.23	71.233	95.965	78.363	113.02	70.306
93.638	117.78	132.41	143.77	132.61	105.55	145.7	120.69	133.44	150.61	104.5	94.419	118.72	85.212	122.65	93.744	131.75	99.04
68.533	160.99	165.02	180.62	166.38	174.94	184.85	187.52	181.55	191.15	136.68	170.97	127.73	172.31	117.31	147.11	117.72	143.08
155.48	180.41	195.71	149.27	223.09	192.83	186.8	147.9	179.76	176.3	179.23	208.71	141.64	231.58	146.95	221.88	119.39	184.12
100.74	159.32	180.23	138.57	161.54	111.43	154.81	138	145.28	119.29	175.04	196.14	163.02	190.04	162.04	174.89	195.37	176.03
99.185	134.92	138.95	113.8	126.65	128.29	130.45	110.12	123.8	94.963	138.67	129.75	132.3	127.39	126.21	121.14	123.4	122.49
159.27	117.78	90.377	104.21	104.06	101.85	117.87	119.5	107.71	118.41	122.23	79.552	130.05	99.074	136.73	100.32	124.13	103.4
159.27	117.78	117.85	104.21	113.29	105.43	117.87	119.5	107.71	101.85	122.23	115.78	122.88	99.074	134.5	100.32	123.82	114.07
148.09	143.14	165.1	174.33	154.46	153.08	168.46	165.94	173.63	201.36	134.38	126.45	130.52	136.05	135.53	134.02	157.48	139.03
82.397	97.248	96.55	88.696	94.05	202.62	92.046	112.45	96.768	117.96	93.944	101.28	93.141	94.635	88.25	88.068	100.49	94.857
39.143	95.562	80.802	116.16	94.05	119.74	92.046	131.41	94.65	86.454	83.297	62.514	87.173	69.004	83.54	84.986	84.719	81.574
140.2	120.42	116.81	128.73	118.3	99.224	121.35	139.33	121.31	132.21	115.35	103.15	119.47	99.43	121.9	111.99	127.11	116.91
192.85	107.22	97.207	110.46	86.466	95.942	94.352	130.39	101.03	140.52	96.693	99.32	111.36	98.684	131.45	95.309	138.96	94.121
125.58	104	122.83	110.46	111.11	84.591	112.18	109.04	101.03	114.32	94.194	101.58	111.36	88.881	126.41	82.178	126.21	80.618
120.37	96.246	122.39	94.009	111.11	76.853	112.18	83.677	120.13	100.62	83.598	94.168	77.266	88.881	65.814	86.25	60.548	86.008
184.09	116.92	145.86	128.1	129.58	113.37	134.05	133.49	135.69	151.84	93.287	111.11	106.32	99.802	100.32	100.75	101.03	103.44
204.87	128.81	149.39	136.6	129.32	141.98	133.46	146.99	129.09	150.09	135.32	147.82	111.45	137.14	115.6	132.62	115.59	141.03
169.3	148.9	149.39	131.86	133.03	108.12	135.78	153.46	123.99	135.57	143.61	182.2	133.86	183.49	135.93	162.25	148.44	147.39
154.27	160.29	164.41	133.65	153.36	107.67	161.9	127.06	136.99	106.52	155.41	185.13	158.38	166.34	166.17	153.18	165.28	148.72
174.49	92.863	101.69	89.977	124.21	78.527	102.67	85.049	89.954	88.316	86.173	96.84	96.943	97.472	105.74	107.26	124.1	87.69
157.61	122.11	149.03	89.977	118.26	77.31	118.16	103.01	108.77	113.51	136.2	142.19	134.85	129.51	145.47	130.14	151.98	134.81
143.48	172.59	191.62	126.55	163.28	102.17	151.05	120.78	131.12	90.933	161.85	201.35	168.28	171.33	173.63	193.32	185.4	176.17
65.01	98.26	96.004	88.688	89.33	78.926	95.079	118.23	90.307	112.93	100.39	88.497	94.488	94.669	98.116	91.401	103.45	92.807
65.01	116.66	128.23	139.56	120.46	114.22	140.18	127.97	131.67	111.3	100.39	82.502	110.07	86.115	107.53	93.957	99.675	92.807
74.225	140.94	114.57	137.92	136.17	103.61	134.51	122.54	133.79	143.3	139.1	120.03	141.71	110.56	135.59	117.57	117.98	124.2
127.64	73.602	82.422	71.525	70.944	73.49	70.213	66.38	71.527	70.381	78.178	93.568	62.159	93.599	62.014	89.397	61.737	82.662
149.69	172.41	199	158.82	160.48	97.803	176.12	135.54	153.1	130.31	181.18	226.82	145.24	204.7	150.51	193.57	158.02	178.59
286.26	190.64	178.97	167.63	166.89	119.78	159.36	178.85	158.06	188.96	201.91	226.28	203.41	201.48	218.96	201.81	218.12	198.36
240.59	170.73	220.22	140.6	193.99	110.64	168.95	127.71	160.76	155.23	183.4	239.3	162.86	236.01	171.25	210.8	175.52	199.39
213.82	117.3	135.8	84.864	108.84	72.702	92.478	94.168	88.914	102.33	144.97	173.19	154.99	148.38	160.08	158.25	156.94	140.2
119.77	65.777	74.794	74.945	72.884	81.284	96.552	59.228	85.556	70.13	82.82	76.141	78.851	74.841	73.5	94.774	71.57	78.255
174.9	76.943	96.763	95.16	102.02	66.587	88.625	67.976	88.522	56.456	56.781	108.63	55.665	91.257	58.194	79.213	61.119	67.233
102.43	53.509	53.07	67.167	66.39	67.326	62.627	81.069	62.691	99.131	39.672	53.335	49.786	43.629	49.154	38.438	54.393	40.85
109.9	70.618	75.575	86.735	74.121	72.018	85.397	89.807	81.719	103.58	56.561	63.469	61.543	66.436	58.727	54.554	80.38	62.437
126.18	134.48	145.25	133.8	145.21	192.62	160.4	109.85	144.04	123.98	126.47	158.62	117.31	161.93	113.62	141.2	113.54	122.05
58.48	60.29	59.315	57.475	58.653	79.326	62.793	67.735	55.353	89.174	68.062	78.331	70.04	58.597	72.716	62.899	76.646	71.6
88.466	91.602	94.463	95.26	90.063	88.219	100.1	97.98	99.422	103.78	79.458	91.537	70.515	76.907	58.203	89.051	61.831	87.689
85.11	98.047	115.01	102.27	111.26	77.394	126.47	71.472	115.86	70.672	71.535	68.814	92.223	58.458	80.668	67.578	61.996	69.589
140.95	99.616	111.72	75.94	103.23	69.65	93.236	66.934	84.938	58.512	101.31	110.62	92.223	102.54	81.313	114.88	77.092	112.85
137.08	187.13	209.66	151.27	204.12	126.32	201.13	113.12	183.68	72.395	147.64	182.6	159.44	172.84	163.86	194.39	166.25	151.09
276.13	160.49	209.66	117.75	188.68	108.45	173.23	110.06	137.58	105.91	147.64	184.9	153.91	172.84	161.08	177.66	153.36	151.09
51.079	60.425	64.06	65.202	62.487	87.824	73.818	57.822	66.837	54.935	58.154	60.063	54.134	59.361	54.692	62.99	54.851	63.704
51.079	49.563	49.816	66.675	45.526	75.818	48.54	57.822	52.48	54.935	51.42	37.496	57.81	42.297	57.202	41.688	52.058	48.533
92.856	70.175	77.618	66.906	73.799	45.992	72.407	61.987	64.32	55.131	69.787	79.88	67.95	76.479	59.941	72.051	54.752	74.464
121.54	103.45	107.35	104.85	95.915	82.388	106.52	109.84	113.53	123.09	119.23	120.59	112.27	111.59	110.12	121.72	100.36	128.02
242.05	113.19	136.46	104.55	146.89	79.087	129.92	94.123	117.7	116.29	119.23	156.27	101.29	139.54	97.877	125.09	109.03	114.71
147.78	94.245	97.682	77.93	94.253	63.296	92.64	73.527	84.521	71.732	117.53	118.1	100.41	118.45	102.12	102.77	92.633	117.46
101.22	87.07	88.17	67.696	77.76	53.984	74.406	65.578	76.035	57.378	96.853	136.4	78.634	139.83	71.437	116.34	68.891	105.16
114.77	87.816	81.465	94.672	73.636	78.221	87.642	77.472	89.334	119.75	98.762	110.16	77.711	130.91	70.622	126.16	60.421	99.963
192.6	160.63	201.48	116.49	154.15	111.33	127.01	127.08	114.53	127.81	192.1	216.03	174.07	202.78	178.65	189.94	183.34	186.67
241.83	228.19	228.1	254.95	230.19	213.7	249.89	249.23	246.37	207.56	192.58	195.75	224.84	191.81	240.39	181.28	258.72	197.67
215.34	191.69	183.46	202.59	172.43	149.77	188.86	215.8	193.97	193.05	182.39	166.84	185.07	159.78	186.21	163.37	198.07	174.71
199.14	183.63	230.55	172.81	201.38	124.21	204.43	159.24	191.25	164.52	182.39	207.62	153.86	198.65	147.1	210.85	154.13	200.66
152.88	109.41	111.32	83.826	100.63	66.818	113.8	85.51	90.942	106.17	110.44	148.3	103.04	136.2	108.92	126.02	97.792	118.76
81.55	57.906	67.338	64.097	66.193	52.839	71.76	65.644	67.373	65.992	61.391	93.184	52.196	93.039	54.651	74.532	56.358	68.08
76.056	68.678	90.739	62.422	78.38	65.545	83.272	66.079	68.096	81.971	56.296	58.13	40.598	61.707	35.13	64.053	35.289	64.986
90.075	111.71	111.45	117.19	100.51	95.196	118.19	115.64	114.14	109.35	96.706	76.731	109.83	77.697	112.35	84.762	127.78	88.071
207.38	142.78	132.23	117.19	128.79	80.7	118.19	119.59	115.55	130.58	177.57	184.19	150.54	201.68	156.7	175.69	144.91	183.28
150.76	134.42	172.76	117.14	134.29	207.83	128.45	150.74	114.19	114.55	146.52	194.42	131.58	180.22	129.41	157.28	127.94	156.34
150.76	188.85	220.7	162.05	168.27	136.55	198.95	155.31	177.03	135.27	176.41	201.86	192.39	209.62	181.89	187.18	179.12	165.73
111.15	155.06	180.44	144.62	154.61	129.87	158.83	134.07	168.51	111.52	140.89	186.99	140.31	176.61	132.03	178.2	120.7	150.74
189.16	211.22	224.93	170.35	199.84	149.33	200.18	197.03	173.95	204.34	200.44	223.19	192.14	218.68	195.49	228.94	215.51	213.72
150.28	158.77	161.86	146.65	160.19	142.32	160.59	147.85	148.22	162.81	138.66	147.23	135.25	149.56	134.53	154.23	136.85	135.65
113.65	290.73	320.53	247.52	281.64	199.79	290.92	220.81	275.14	179.48	290.51	310.53	252.06	298.01	242.56	300.63	197.37	293.6
109.69	212.71	191.08	157.32	180.05	167.96	183.71	163.77	167.11	158.85	219.64	211.27	212.77	197.86	201.81	190.53	181.15	195.11
240.67	122.51	129.2	123.49	128.95	126.34	138.34	107.58	125.48	96.146	126.09	137.98	120.41	123.53	111.58	113.39	98.786	113.76
205.5	214.87	234.92	169.18	215.21	186.23	225.17	158.89	203.34	140.55	215.15	215.11	200.36	224.42	190.96	215.52	157.81	222.48
96.138	94.725	98.687	82.99	87.483	60.939	101.43	82.062	96.349	97.514	94.24	99.42	104.22	105.98	117.78	82.321	128.89	85.315
96.817	106	113.66	85.997	113.62	108.8	101.43	82.062	103.65	89.753	125.42	120.7	121.89	112.34	117.78	122.88	106.88	131.8
100.46	86.961	100.93	84.853	96.426	65.586	100.14	82.978	86.854	82.776	82.83	73.152	92.371	64.499	93.708	76.244	105.53	77.705
81.76	97.546	106.52	92.705	101.15	87.055	98.957	100.1	96.946	105.36	83.361	74.475	97.828	69.407	100.23	79.57	115.63	78.22
101.04	97.546	106.52	120.64	110.57	109.81	125.78	118.25	116.18	128.37	88.255	75.052	99.338	78.482	100.23	79.57	115.63	79.987
145.11	145.95	138.54	143.77	129.83	110.29	133.73	126.48	141.59	90.878	157.41	116.57	155.83	120.36	150.19	132.07	125.91	145.81
173.51	119.47	120.27	86.844	121.98	96.199	109.08	87.172	92.468	82.35	128.95	153.38	122.66	148.48	139.49	146.96	139.96	124.76
154.5	49.859	59.855	44.698	61.97	64.444	55.627	50.148	47.72	63.237	63.259	73.619	45.74	70.513	47.326	57.061	49.29	56.318
161.17	118.94	117.57	134.71	128.22	111.74	147.65	124.81	144.73	118.27	109.09	72.621	129.48	72.725	127.13	85.83	123.01	96.824
101.02	117.71	121.03	134.71	121.58	140.87	139.79	124.81	144.73	118.9	100.22	137.74	107.81	140.2	102.32	119.29	106.16	102.75
198.62	210.44	226.28	207.62	214.2	138.86	206.33	194.81	212.8	167.33	193.39	222.57	196.35	203.68	198.73	186.33	176.23	176.78
204.19	164.19	190.41	147.41	193.62	172.23	166.31	135.22	148.45	109.87	156.44	203.26	136.5	174.17	141.56	169.43	147.71	167.57
282.92	204.39	228.26	173.59	185.46	123.38	184.65	178.8	186.88	182.21	195.47	255.36	177.77	264.78	180.85	239.48	182.32	210.41
261.01	266.95	248.24	216.78	192.27	236.04	217.09	228	211.26	219.53	292.87	286.12	274.58	280.25	276.16	267.23	249.02	285.03
237.41	137.8	145.77	131	140.59	136.8	137.22	129.98	135.02	158.03	135.87	145.11	144.83	145.68	135.36	148.32	150.09	128.34
140.13	198.71	170.36	173.31	171.24	158.6	195.83	178.06	193.19	181.29	193.41	165.15	203.31	160.89	213.31	171.6	259.29	176.19
72.898	99.88	85.649	123.42	85.465	118.51	105.76	132.07	107.78	158.85	93.451	69.37	99.524	64.722	108.12	68.145	92.672	83.559
102	71.217	82.058	80.554	88.816	66.042	83.21	83.002	77.263	88.712	79.175	105.45	73.229	97.665	66.63	91.215	68.783	84.231
84.856	94.804	90.462	111.47	120.17	109.99	123.41	105.34	115.8	111.17	79.907	62.713	87.769	73.06	85.444	90.072	78.931	77.157
64.88	96.186	100.44	124.5	110.95	91.111	123.41	114.77	118.34	97.81	84.61	84.695	87.767	84.422	85.444	79.204	78.931	85.203
141.56	65.671	69.622	74.953	59.329	99.289	74	67.605	71.573	81.784	61.991	85.225	74.236	81.525	68.055	65.546	68.951	69.089
112.75	82.268	76.733	92.508	77.811	93.951	90.541	67.129	90.208	54.912	79.318	94.418	77.61	92.979	79.786	84.733	68.951	79.867
93.405	68.404	78.364	70.86	68.221	69.399	73.464	80.991	67.115	103.64	74.173	98.908	67.956	89.425	65.882	77.31	69.017	75.594
98.245	88.795	93.768	102.68	87.595	77.033	92.39	92.307	104.21	83.231	84.572	81.446	81.179	78.435	72.237	78.141	76.026	83.116
103.93	89.219	115.02	96.928	121.86	76.427	116.83	82.795	100.26	64.592	101.61	98.411	88.107	108.36	95.995	112.02	95.521	105.31
154.99	140.8	148.26	158.57	137.04	176.52	145.57	167.87	152.56	177.75	130.55	128.71	135.56	121.15	141.91	123.9	155.48	120.98
146.89	147.74	140.37	146.12	126.39	128.51	144.09	170.77	140.82	178.82	141.15	161.06	146.87	148.51	155.72	142.03	193.88	140.44
92.196	101.03	85.985	125.37	88.851	117.91	108.57	144.32	113.43	191.56	85.541	77.335	95.287	81.007	115.35	74.169	140.64	85.464
111.86	101.03	85.985	125.37	88.851	113.65	108.57	137.35	113.43	181.55	85.541	85.277	93.783	88.949	97.225	81.982	104.13	85.464
170.46	151.33	160.6	136.16	146.58	113.65	153.46	118.84	148.54	102.83	159.53	131.91	163.79	144.45	160.99	154.92	150.38	157.95
83.495	54.376	45.564	52.538	53.73	47.561	41.753	44.753	50.346	36.338	60.794	60.464	74.11	52.067	67.855	51.193	68.643	60.424
40.588	40.879	25.804	49.241	38.647	47.561	41.803	49.644	43.171	44.274	44.079	28.665	47.988	27.575	48.968	32.48	49.369	42.908
46.832	22.503	20.737	30.442	17.579	27.981	26.354	30.053	27.595	40.743	20.448	13.954	22.419	17.038	24.606	18.499	31.149	19.348
35.619	25.416	22.591	28.33	19.75	38.375	27.734	28.793	28.436	20.878	21.464	15.802	30.344	17.15	27.774	21.048	29.099	22.655
61.535	30.797	22.304	35.372	25.32	31.066	24.309	35.971	34.415	35.412	34.181	20.196	40.857	24.925	48.076	29.769	47.66	35.077
49.304	30.077	22.962	28.406	17.383	37.697	23.985	30.52	26.023	33.44	34.747	18.409	41.838	20.59	43.485	27.542	44.53	28.014
22.439	22.963	19.88	21.877	17.383	25.775	22.248	23.3	25.176	27.545	29.234	15.84	30.316	18.983	33.436	25.871	40.087	26.424
23.632	29.646	30.167	25.131	26.327	25.775	22.597	23.3	29.68	20.62	32.422	33.098	31.319	34.1	33.98	33.451	40.263	34.649
36.863	24.626	18.595	17.282	16.964	29.925	16.837	17.768	20.913	21.343	32.422	22.666	31.319	28.119	33.298	29.57	27.983	34.649
36.863	19.668	14.391	18.675	16.053	30.335	13.704	20.185	16.914	18.633	27.032	16.904	25.102	18.788	30.795	18.017	32.777	27.228
29.171	19.668	14.559	18.207	16.053	11.85	14.909	17.858	16.38	12.323	19.879	9.2761	23.174	13.689	22.867	18.928	23.842	22.442
29.725	15.115	13.468	12.876	12.396	13.094	10.352	11.241	13.354	11.555	19.879	9.2541	16.548	13.689	15.278	18.928	13.897	18.481
45.291	15.262	14.308	14.254	13.632	12.068	14.255	14.8	15.667	18.608	16.033	10.175	18.624	11.129	19	13.67	19.351	15.669
23.099	14.402	15.392	12.072	13.751	21.286	16.2	9.9076	18.195	8.0256	14.983	11.92	9.9115	16.975	10.507	19.955	10.915	20.211
28.721	14.156	15.456	13.757	13.097	18.39	13.624	13.333	13.232	11.323	15.658	13.081	16.415	13.89	15.261	12.991	14.662	16.144
27.752	26.701	24.736	26.134	25.951	21.58	25.396	26.234	25.8	22.044	25.527	16.333	29.945	16.706	27.883	23.456	28.95	23.797
25.309	16.519	20.636	17.75	18.596	12.362	22.601	14.724	20.319	11.284	17.777	13.428	16.472	13.259	15.949	15.027	16.607	15.993
25.309	23.297	17.993	21.494	19.056	16.244	18.95	21.27	21.585	17.648	30.223	14.887	33.476	15.32	28.518	25.928	23.554	25.126
22.791	24.741	19.739	24.634	20.088	20.715	22.988	26.729	24.515	23.435	25.756	14.887	31.168	18.705	29.687	25.118	27.966	23.324
28.418	25.566	19.562	24.821	18.388	23.039	21.914	31.052	23.212	29.68	26.441	17.25	34.695	16.878	34.792	25.118	40.178	23.651
23.357	14.22	13.034	12.061	11.15	8.249	11.319	12.703	12.301	15.92	14.215	10.205	17.377	14.032	20.184	14.654	16.611	14.845
23.726	32.715	25.257	33.81	21.417	26.101	27.065	38.241	22.677	38.341	34.764	19.526	40.328	22.514	46.079	31.237	51.7	25.437
24.015	33.997	26.295	38.198	28.174	33.35	30.236	36.114	47.467	32.589	28.295	27.505	35.07	23.927	38.453	23.338	35.652	32.375
19.543	22.767	16.938	24.701	19.414	21.646	22.98	29.367	27.132	21.045	24.028	13.015	24.978	14.383	24.243	17.572	25.908	22.678
19.807	17.509	15.368	20.103	14.384	20.149	16.77	22.838	14.533	18.321	18.078	10.497	17.705	14.534	18.08	26.591	24.486	19.018
15.818	23.194	17.485	26.918	14.723	23.055	17.53	26.469	20.622	24.767	28.903	20.837	30.836	21.56	32.188	31.567	30.64	27.446
37.265	20.276	16.47	31.488	22.791	20.139	19.248	34.859	25.203	33.974	18.585	11.483	27.912	9.7322	29.243	17.342	36.921	17.237
37.265	24.198	26.885	22.598	24.052	39.811	21.357	22.658	25.203	19.265	34.111	39.622	19.469	41.509	18.263	40.144	18.21	36.901
41.463	60.418	54.483	59.484	46.484	73.12	53.347	57.269	63.436	60.202	78.67	65.539	65.058	67.917	64.925	74.708	58.857	84.405
104.34	102.97	79.688	122.15	70.183	107.2	92.14	147.58	110.59	159.33	97.281	91.402	122.03	97.403	127.28	92.958	125.28	107.16
80.199	88.184	75.995	82.507	68.876	59.58	71.922	81.445	75.476	87.727	95.285	80.516	104.23	74.003	94.047	76.876	96.153	90.785
22.94	30.091	30.181	24.971	18.975	26.791	22.056	27.215	26.202	22.983	40.887	32.286	35.819	33.477	41.713	31.298	45.877	37.241
63.238	60.144	45.781	58.63	40.485	49.551	47.078	63.501	55.07	61.467	55.793	45.222	55.034	47.486	59.196	51.219	60.261	52.988
94.871	62.143	61.101	73.361	57.895	59.452	65.836	78.515	77.783	85.739	55.793	50.788	49.083	59.446	54.37	58.424	59.782	52.988
168.3	121.25	156.29	134.49	147.63	113.87	139.64	127.06	135.6	124.41	115.74	121.63	128.5	115.14	129.74	101.77	134.1	108.5
111.24	96.703	74.957	82.852	82.99	98.33	71.845	120.08	89.764	143.78	127.24	120.02	112	121.39	119.33	99.85	111.8	113.05
50.798	76.39	62.879	78.676	77.954	89.586	60.018	86.496	84.324	78.467	72.711	85.981	78.867	82.097	80.306	58.31	74.078	69.347
40.996	64.162	61.269	72.417	66.407	51.399	60.018	65.857	63.458	64.455	74.027	64.449	65.956	59.961	57.389	65.896	63.084	71.972
55.86	64.162	65.4	72.697	75.383	82.4	72.985	70.753	70.762	70.885	51.469	53.984	50.256	54.46	46.639	55.655	59.581	46.061
116.26	79.783	88.767	106.06	89.698	99.099	100.4	96.861	103.62	90.521	57.532	52.623	72.174	62.996	74.259	61.865	68.115	58.009
188.11	85.246	90.623	83.557	77.037	79.818	79.604	85.82	85.613	94.443	90.269	87.959	89.278	87.674	89.653	93.38	89.371	89.548
99.639	73.595	67.995	72.742	70.849	52.451	67.439	77.816	73.275	75.706	80.065	63.375	81.401	68.629	82.918	65.294	77.409	74.53
49.015	76.915	61.81	87.822	62.865	84.127	76.343	83.62	90.479	84.925	67.792	60.536	75.06	64.966	59.487	52.839	53.583	63.561
83.928	98.023	94.044	88.938	87.928	108.49	84.098	93.195	93.589	88.427	104.84	118.42	95.587	111.3	89.671	109.15	90.704	108.63
33.27	64.427	50.315	68.667	50.986	54.253	50.89	62.094	72.335	40.228	56.043	36.873	60.579	42.741	59.062	48.106	62.032	60.375
46.622	72.531	62.243	86.293	69.677	68.641	80.99	83.229	83.669	73.333	65.264	60.939	68.792	63.742	69.085	64.615	80.839	65.948
36.336	56.783	53.278	66.209	51.09	55.622	55.005	73.299	65.986	63.556	55.11	43.304	57.508	37.824	53.541	48.547	52.547	55.387
77.477	79.63	59.351	54.822	53.052	41.139	48.37	51.484	52.882	54.675	85.453	54.404	69.534	61.165	69.144	64.834	69.359	78.312
127.71	69.651	67.86	73.225	51.431	79.249	59.079	92.903	66.501	121.91	70.208	67.73	69.534	75.752	77.753	74.5	95.587	71.691
70.073	97.746	83.664	118.4	96.614	124.43	101.19	130.79	104.75	142.54	78.321	64.89	82.78	77.551	78.053	64.335	105.07	73.125
51.073	82.147	71.126	100.78	80.843	99.054	84.11	86.542	93.01	100.02	72.93	76.027	76.583	77.99	75.498	88.829	75.267	75.188
51.073	72.858	71.126	77.34	80.843	82.676	71.594	90.904	70.058	118.59	64.237	55.181	76.583	60.274	82.777	59.534	94.696	58.098
63.964	82.494	81.992	84.819	84.239	91.287	92.368	88.889	88.177	84.2	70.166	78.493	82.144	70.923	72	73.054	75.697	70.003
74.756	82.494	81.992	99.548	89.891	132.17	92.368	107.87	96.288	143.95	72.132	69.119	82.569	82.411	88.491	67.36	77.104	70.003
160.47	115.08	106.31	137.2	121.6	111.09	112.84	130.19	122.67	152.72	104.17	107	105.61	100.67	99.457	109.64	99.569	108.73
90.893	58.501	84.419	62.177	91.694	84.107	68.232	66.354	62.605	84.805	60.112	78.184	61.04	75.191	75.218	58.648	92.424	61.886
60.05	101.32	91.003	117.38	87.694	133.66	96.74	95.612	95.159	95.128	110.29	133.32	120.46	140.08	118.84	113.77	122.96	115.66
95.671	55.414	80.152	71.332	68.614	65.357	74.9	71.353	67.36	88.628	54.755	74.922	46.895	63.736	46.688	68.291	46.477	59.712
66.906	52.992	53.435	68.689	58.228	88.698	64.393	64.118	66.344	75.104	57.573	60.032	51.477	63.736	48.96	64.107	53.697	69.554
57.106	73.85	77.031	85.595	93.566	90.006	79.707	76.48	77.849	73.002	64.559	65.116	71.149	60.523	75.987	69.401	82.439	65.185
121.93	98.801	87.829	113.8	123.6	155.6	110.14	132.19	116.35	148.53	76.325	65.116	86.397	75.725	86.463	82.34	92.63	78.609
177.66	204.82	231.55	201.86	213.2	174.14	236.3	202.86	207.7	175.21	179.91	206.03	178.37	178.98	176.26	175.72	185.06	161.91
171	227.34	231.55	201.86	213.2	174.14	236.3	202.86	207.7	203.05	203.34	257.7	196.01	225.5	218.71	215	233.99	201.68
121.72	114.59	116.28	95.774	106.67	125.25	108.83	90.405	117.09	90.611	126.82	147.98	109.48	140.08	114.23	147.27	127.59	132.61
158.44	136.12	133.73	123.06	124.5	123.21	138.32	122.57	131.49	136.3	142.08	152.33	123.22	148.31	122.3	133.58	127.84	141.64
191.5	131.79	136.57	131.82	132.58	132.86	134.28	118.15	125.9	130.49	128.8	148.75	136.46	129.48	139.83	113.51	141.1	129.2
103.23	116.9	117.2	117.59	112.7	98.549	125.06	106.8	117.92	107.56	117.62	108.26	113.76	111.05	110.77	105.21	117.07	126.98
151.96	112.6	113.82	118.09	108.25	89.089	124.46	106.8	114.31	107.56	117.62	109.51	109.96	103.53	95.024	114.64	73.606	118.59
164.26	130.5	175.24	132.29	151.11	103.09	158.78	92.801	136.75	123.18	135.19	162.79	128.25	133.57	138.29	148.5	130.28	137.91
146.57	65.594	71.994	81.044	71.065	96.709	69.22	69.598	77.208	86.801	64.023	50.704	74.052	52.961	83.401	55.739	105.44	61.662
116.68	100.02	120.64	115.56	115.81	122.19	125.64	100.55	116.96	96.157	87.691	76	94.656	69.484	89.894	92.279	92.671	80.346
80.383	89.256	93.043	103.87	83.871	94.939	96.989	99.086	90.269	96.157	73.382	78.617	80.673	71.445	76.392	68.492	72.306	67.658
95.768	109.08	94.371	116.87	87.263	129.4	96.989	116.09	102.09	122.97	107.46	110.75	105.85	125.24	102.16	104.14	99.798	110.9
191.68	120.27	126.9	128.69	144.02	110.34	132.14	128.37	118.82	134.18	118.71	139.8	109.6	125.24	113.84	114.56	138.29	112.01
284.31	262.45	255.04	219.58	208.87	197.25	209.22	240.04	218.11	195.41	256.59	254.35	273.61	230.54	298.1	250.18	269.89	233.27
179.17	123.89	118.14	150.75	151.77	171.28	143.22	152.49	129.96	177.2	103.96	93.255	131.04	95.65	132.92	101.71	138.89	100.98
143.79	113.17	121.81	101.34	116.7	112.24	117.45	105.78	109.1	135.35	80.594	143.97	102.39	130.82	108.58	97.617	115.81	89.185
118.32	148.17	155.35	134.04	131.06	175.24	127.64	125.08	138.16	128.21	147.3	156.94	139.13	149.31	155.35	150.74	159.66	150.09
38.449	40.994	36.989	44.119	41.413	175.24	39.36	48.82	44.153	45.556	41.081	34.003	43.325	33.487	42.489	41.096	60.174	40.421
30.871	67.386	59.764	63.062	62.436	72.608	57.675	68.509	70.141	57.521	67.207	60.902	72.68	47.693	70.906	65.21	63.817	62.212
17.48	53.318	45.671	50.879	45.275	46.115	45.513	51.609	52.809	40.55	56.517	45.284	58.703	42.486	52.469	46.635	47.411	49.483
22.79	44.647	43.083	44.104	37.4	44.632	41.945	44.683	52.404	37.533	45.932	34.883	51.582	37.386	53.512	40.082	51.941	37.869
35.97	61.682	61.513	60.462	53.789	55.61	57.148	54.3	65.692	46.271	60.052	44.652	65.998	49.669	59.433	59.894	54.395	59.902
20.108	44.092	39.713	44.963	40.527	35.794	40	45.778	41.131	37.769	44.55	30.189	50.475	35.916	51.65	37.214	50.865	42.998
21.033	64.494	47.73	56.789	42.588	42.313	53.577	58.87	59.638	47.335	61.71	38.72	66.854	52.622	64.578	57.949	65.511	53.26
72.113	66.189	63.507	56.789	49.837	40.739	53.577	53.201	59.638	48.232	90.223	81.538	69.817	88.617	66.941	88.414	65.613	93.935
38.078	54.608	59.411	52.516	51.311	40.739	52.139	46.143	55.07	35.259	71.018	73.24	54.592	76.711	50.112	81.814	54.242	79.146
51.964	83.578	75.772	94.708	68.134	110.75	82.843	101.92	78.998	93.509	66.668	71.108	75.547	73.126	63.316	64.77	64.779	62.93
74.79	54.905	57.01	70.869	66.007	94.131	69.039	82.256	60.504	93.509	50.934	62.424	56.093	62.983	62.831	62.668	64.779	50.323
91.075	73.295	94.139	52.457	94.928	98.792	83.177	63.157	58.939	42.404	79.7	106.58	65.981	121.53	74.256	84.956	61.998	82.942
91.075	110.56	135.25	99.387	126.26	107.17	131.21	87.16	113.98	86.816	101.33	106.58	99.168	110.11	109.25	111.99	111.17	107.62
71.682	58.824	39.997	62.498	53.979	111.51	51.738	87.739	63.403	84.34	73.515	71.67	63.434	56.226	66.632	64.726	79.257	73.339
77.912	98.281	77.908	103.97	75.024	101.75	77.21	128.45	90.142	150.75	109.27	73.335	123.11	76.919	143.79	80.289	162.76	100.22
79.428	81.468	84.85	102.29	75.98	116.62	99.642	115.16	96.062	125.26	84.928	64.469	112.11	62.114	99.087	74.325	103.09	78.547
93.38	77.809	76.754	109.26	80.3	87.759	95.573	100.89	96.062	83.091	65.468	71.712	80.06	67.671	77.198	65.809	80.485	65.297
72.968	90.511	73.851	108.9	76.788	110.08	83.442	116.67	91.268	118.32	95.722	99.147	98.692	80.069	106.99	94.245	124.8	97.643
77.408	79.642	64.702	110.93	76.788	117.44	88.975	113.25	100.63	122.56	74.121	47.897	97.432	51.04	109.27	57.806	126.14	65.007
101.6	88.339	106.24	74.517	93.153	78.56	84.124	68.771	79.104	80.763	99.539	121.35	90.428	118.77	86.813	100.39	83.487	97.64
102.28	61.491	76.364	71.298	82.166	141.74	75.15	69.894	73.985	96.147	61.541	67.093	64.162	64.459	62.645	62.798	72.306	57.581
91.784	74.111	100.1	91.768	92.805	138.58	112.64	98.812	88.465	121.08	70.122	89.373	75.36	81.122	69.99	83.362	72.576	77.289
92.647	149.44	160	138.04	143.42	149.28	145.05	130.37	144.08	121.67	145.37	167.8	139.86	174.67	136.87	156.78	130.12	146.23
117.82	177.45	169.54	135.79	143.42	132.27	145.05	121.35	144.08	112.32	194.42	231.2	169.92	241.53	149.62	222.44	120.15	213.34
103.44	133.23	103.25	130.06	96.596	146.4	110.95	147.73	123.02	127	138.26	106.64	152.99	107.3	161.88	120.16	164.67	127.62
95.793	110.94	90.784	126.72	111.7	101.58	121.78	124.94	119.08	117.01	106.27	61.743	122.84	71.261	129.34	94.67	141.38	99.196
115.56	62.6	62.59	81.752	66.267	130.9	78.057	94.454	75.847	117.51	63.191	65.567	68.868	63.34	74.232	61.062	84.813	66.778
153.91	196.02	211.04	185.25	205.95	185.28	206.46	190.05	193.3	171.86	187.82	186.03	197.47	184.6	203.78	180.34	212.82	180.27
108.11	109.47	114.25	74.981	108.49	81.111	109.42	79.253	96.545	103.44	95.063	132.44	104.21	140.57	108.56	113.6	109.26	103.28
203.14	115.99	124.53	119	129.21	81.111	120.55	92.141	123.82	103.44	133.93	128.54	120.55	116.71	136.53	119.03	136.51	132.32
180.7	104.04	101.14	88.461	91.027	110.55	96.758	92.008	99.124	107.72	100.4	86.248	103.95	94.212	111.93	93.907	118.44	97.647
139.89	113.07	114.46	109.51	105.39	73.289	109.82	105.81	115.66	97.939	110.8	105.22	117.13	94.212	120.78	99.76	127.26	108.44
153.23	96.714	112.28	93.462	110.91	80.712	114.53	94.357	98.504	88.526	95.569	100.92	87.896	107.5	83.672	104.52	86.227	105.25
148.41	104.87	114.02	115.98	116.85	80.712	115.09	101.11	116.1	106.42	98.344	135.87	87.896	114.04	83.672	104.52	86.227	107.49
82.873	76.687	94.836	82.032	81.482	70.747	88.388	77.072	80.533	68.627	73.966	73.05	62.038	80.507	65.034	91.243	52.613	74.375
160.35	115.95	109.51	125.32	128.82	240.48	121.67	135.94	123.02	129.41	110.09	109.09	104.84	108.75	109.8	102.88	117.69	109.48
111.29	140.53	127.64	124.73	124.07	113.07	111.64	113.51	136.22	111.6	141.55	163.83	126.69	162.03	126.86	162.48	124.15	169.97
107.93	110.44	120.72	84.197	99.93	115.78	101.19	78.181	91.132	82.78	126.47	131.75	96.065	126.93	102.8	143.2	107.74	139.24
147.52	185.31	200.08	198.77	198.93	155.08	206.91	204.24	207.64	206.06	158.4	167.59	177.5	154.53	189.33	153.48	192.21	152.03
229.76	128.76	146.41	120.08	136.78	150.07	126.55	126.67	129.28	132.36	117.35	151.13	96.543	148.03	102.08	138.71	117.14	129.61
124.64	172.02	159.36	150.57	152.22	174.92	156.46	155.82	157.97	150.2	174.35	158.38	172.52	160.22	165.16	185.43	152.15	172.22
153.58	102.96	94.685	109.3	111.53	95.647	101.13	115.66	108.56	131.63	99.697	86.79	107.3	92.25	117.91	92.253	138.58	94.671
112.79	127.28	117.3	107.09	106.18	92.22	114.01	121.53	114.17	111.43	142.13	122.05	141	117.11	133.53	129.4	138.98	139.54
112.55	133.79	131.13	115.27	118.64	103.6	135.6	127.58	114.17	131.92	129.42	191.48	118.59	174.67	121.55	161.32	118.75	138.38
153.79	110.48	107.56	119.77	86.694	103.6	95.048	123.85	105.61	132.54	115.39	153.77	115.98	119.32	111.26	126.01	118.75	122.88
143.02	122.61	138.91	129.97	125.77	123.94	142.24	110.53	139.58	87.202	111.51	112.42	102.22	118.04	102.27	119.92	83.94	113.18
112.56	104.6	126.16	90.519	126.52	85.905	123.85	73.768	111.6	86.516	105.37	125.34	98.027	124.7	89.359	115.04	99.904	111.08
134.03	165.35	146.38	136.32	143.34	188.4	148.02	152.12	155.17	167.21	176.22	166.49	159.84	149.87	161.2	154.88	133.48	157.44
205.8	158.82	146.38	165.85	163.71	129.29	180.41	156.8	166	142.3	148.93	188.88	150.85	186.24	154.13	143.43	157.39	156.51
136.34	105.72	120.01	112.6	132.04	79.287	119.89	80.68	122.87	68.373	121.65	121.14	91.753	136.4	75.262	137.25	80.777	128.87
77.074	70.042	76.02	80.538	89.704	83.825	92.536	68.854	72.625	75.222	69.556	61.354	76.324	54.053	72.847	58.357	82.723	69.657
85.605	140.17	134.39	117.67	145.59	91.913	128.68	113.91	124.43	107.38	161.04	141.65	145.89	142.11	137.25	149.3	132.53	151.03
138.32	109.92	128.92	93.482	105.33	75.39	102.2	88.295	103.7	136.48	120.28	140.29	97.283	130.1	92.022	123.65	96.106	128.42
74.344	99.339	112.45	113.89	111.19	108.28	119.57	105.89	113.21	124.24	99.093	100.49	99.258	99.869	89.095	101.19	71.127	107.2
100.01	138.55	159.05	144.15	148.17	126.74	157.61	139.57	154.6	146.82	130.78	143.41	108.79	149.26	92.897	151.24	80.907	138.36
122.14	155.65	170.75	144.15	155.63	148.36	151.83	139.57	139.82	123.33	133.46	163.37	113.82	163.16	95.031	158.97	78.084	141.7
126.15	150.21	166.18	104.99	132.36	93.904	133.92	91.13	124.64	93.638	173.42	191.24	135.56	191.64	133.49	187.17	118.82	182.3
201.46	103.87	106.68	93.018	96.405	117.85	88.355	111.66	89.515	129.78	135.93	129.63	120.71	142.92	128.58	119.44	133.55	129.92
249.72	188.04	166.46	155.62	147.09	138.67	157.14	169.15	156.31	192.27	209	231.3	214.95	200.08	222.71	205.71	229.91	194.75
159.82	188.04	166.46	174.78	147.09	134.81	157.14	169.15	156.31	173.95	181.36	172.24	182.31	164.18	186.73	177.27	199.57	170.63
138.03	124.33	130.36	134.96	138.17	122.75	145.16	127.28	142.56	124.93	109.73	98.106	116.85	99.873	115.85	109.22	110.48	97.88
94.783	56.579	55.081	58.508	53.116	61.254	60.668	74.443	55.778	92.998	56.078	53.921	62.855	55.696	74.083	50.781	99.44	52.595
133.93	99.166	94.678	113.01	113.58	95.153	113.81	120.83	106.03	125.74	88.489	75.02	97.379	72.142	93.112	71.598	84.919	79.823
134.45	83.224	101.36	80.647	95.869	63.722	87.633	74.461	84.251	78.011	81.43	106.85	90.293	105.69	89.91	91.204	71.104	82.728
156.53	116.59	126.1	129.59	110.02	147.62	118.34	120.14	128.86	102.47	116.34	85.225	123.66	96.672	124.62	100.59	118.94	109.15
179.93	144.52	141.36	119.87	113.1	149.77	111.47	120.14	116.9	114.27	170.37	180.16	154.28	176.05	170.87	172.51	196.83	163.56
245.64	237.93	252.58	216.8	232.83	175.85	218.16	205.98	229.37	185.04	219.6	229.41	257.23	195.72	262.17	231.09	266.9	218.13
242.83	123.26	120.41	139.79	123.58	117.62	129.88	152.07	126.4	168.3	105.92	125.94	115.02	104.39	122.98	107.11	143.27	100.3
71.461	115.11	108.17	125.44	97.944	102.1	106.71	137.24	109.3	126.91	108.92	102.81	109.18	98.973	104.29	105.16	91.941	105.19
175.07	130.44	157.58	126.39	144.81	118.39	146.01	143.62	128.58	135.01	133.47	169.32	129.6	146.7	129.48	145.32	124.68	139.56
124.77	123.85	131.66	125.4	132.65	127.46	136.42	127.15	127.52	147.6	117.94	122.95	106.25	135.46	98.645	113.57	105.19	126.58
127.51	168.56	171.47	170.65	172.83	149.73	177.73	151.68	179.51	147.6	176.6	155.86	169.46	141.56	175.78	147.09	186.52	148.05
151.64	213.89	207.58	170.65	181.24	145.85	206.86	143.69	190.11	148.13	226.02	254.28	193.04	236.29	196.37	229	197.73	230.96
180.38	119.5	130.84	100.54	106.96	115.48	101.27	117.59	91.853	138.56	121.71	113.33	110.12	105.77	126.45	113.71	129.07	116.31
44.191	65.376	68.828	69.19	68.302	115.48	72.346	74.848	68.379	82.65	73.014	66.409	69.274	70.593	77.483	65.819	90.624	72.888
46.519	61.729	61.62	55.884	53.331	63.792	66.856	63.698	63.613	58.846	58.398	63.033	56.397	70.593	58.351	65.819	56.354	59.053
82.312	80.207	81.004	73.937	85.302	81.123	72.689	85.73	68.65	94.073	65.396	68.724	84.982	71.103	90.244	66.793	105.43	65.938
28.832	83.47	63.017	87.725	59.808	82.968	66.907	85.73	73.227	96.479	84.639	80.493	76.257	84.371	76.957	81.498	87.024	87.49
160.84	83.47	98.044	87.725	73.922	88.539	69.493	71.861	73.227	72.282	102.69	125.36	91.172	124.29	91.698	119.5	69.244	110.97
224.38	140.21	139.54	145.09	149.29	118.14	139.52	138.74	148.17	124.31	159.24	145.93	138.22	132.88	153.06	145.73	143.93	163.5
275.23	158.8	183.95	145.09	150.34	158.47	153.7	176.79	148.28	187.73	165.95	182.89	172.44	193.71	190.86	176.4	211.92	169.61
165.57	141.55	128.06	136.48	109.77	130.3	113.99	144.49	126.86	133.3	126.65	102.9	146.12	101.69	164.69	105.72	212.16	113.85
91.747	78.603	62.765	63.523	57.548	102.63	56.733	71.234	63.61	71.066	87.248	92.327	85.937	94.647	87.235	87.051	94.724	87.596
42.954	85.152	89.447	92.547	87.5	143.42	92.961	106.76	90.33	117.77	87.248	92.327	85.937	94.647	98.633	87.051	99.274	87.596
89.02	77.238	88.651	82.778	94.333	91.554	91.384	89.543	81.612	84.27	68.965	74.535	74.275	70.084	80.368	71.983	88.491	76.333
141.51	70.322	71.584	65.405	79.374	109.68	67.306	58.716	58.292	76.519	92.711	109.37	82.233	111.75	93.721	105.78	88.491	105.72
108.36	105.52	127.53	76.472	135.57	135.77	116.51	67.714	98.356	59.43	104	90.838	101.18	94.736	93.265	100.16	84.716	110.95
111.55	91.928	113.31	85.804	107.65	65.101	94.387	69.871	93.255	55.34	79.79	106.22	96.728	94.736	89.293	90.799	83.258	84.895
36.121	46.157	51.884	33.894	45.424	43.232	38.413	27.755	39.106	25.76	58.926	76.707	48.632	65.105	47.192	66.313	36.901	67.602
115.21	111.69	128.99	88.236	116.15	59.057	106.73	87.198	91.508	80.492	124.61	154.08	104.16	154.2	109.95	157.38	107.44	127.98
139.78	135.28	129.64	123.47	93.187	106.35	94.947	130.4	107.34	129.38	149.73	200.89	139.54	178.14	132.49	167.32	122.15	175.15
198.36	104.03	99.926	92.912	73.112	86.691	70.992	126.9	90.16	173.02	121.48	96.971	140.6	97.729	156.83	97.777	182.86	107.24
210.72	82.833	131.51	79.412	102.51	59.977	100.49	74.911	89.034	101.77	96.938	138.25	77.531	129.41	82.316	117.04	92.908	105.46
154.93	159.99	163.01	152.3	157.29	123.97	169.5	142.3	151.48	143.87	166.79	146.03	175.65	138.85	183.2	139.53	182.96	163.63
144.14	130.37	143.39	131.86	132.08	163.5	120.03	140.46	126.33	122.39	159.7	146.34	130.87	134.78	130.83	135.3	121.45	151.56
166.6	175.02	180.28	167.64	165.24	111.6	180.72	163.19	168.93	153.12	161.66	193.96	154.26	175.58	151.72	186.84	143.67	168.18
143.84	169.9	180.28	152.65	151.97	121.08	154.3	152.31	140.36	149.97	161.66	191.15	146.84	175.58	151.55	173.06	155.8	168.18
131.2	100.26	102.03	81.735	105.61	84.963	86.988	85.901	79.677	105.9	107.45	169.01	96.397	159.21	101.17	115.94	117.06	115.72
131.2	175.73	179.04	150.17	173.3	120.36	164.53	141.49	154.46	131.77	188.62	208.24	154.73	187.11	133.86	205.91	108.68	196.97
66.754	116.05	108.58	120.5	99.381	83.852	116.62	107.41	118.11	94.372	108.66	131.8	89.385	123.44	71.233	123.83	64.601	111.99
81.281	145.5	161.18	141.25	126.15	140.91	142.96	129.94	140.99	121.93	125.31	153.89	120.84	155.49	121.78	157.74	108.93	145.4
96.652	116.8	112.15	121.7	103.09	92.181	115.81	108.93	116.1	96.468	117.21	125.16	120.84	120.44	121.78	112.4	108.93	114.91
135.72	60.343	64.715	64.163	98.955	104.54	82.289	61.302	71.022	78.619	60.341	56.619	55.011	60.21	57.599	62.792	68.092	66.396
128.68	50.82	52.775	59.317	57.668	61.029	64.6	52.771	56.155	53.654	63.452	52.028	64.664	56.584	66.27	59.144	70.488	57.98
92.792	85.688	90.87	93.573	86.127	80.194	93.552	90.669	95.146	84.61	74.557	70.595	82.493	77.077	72.521	79.907	66.017	79.836
101.86	140.2	141.14	145.36	144.47	237.58	140.28	135.16	139.11	141.96	125.76	125.56	119.93	124.31	110.61	129.5	109.71	127.45
65.3	51.387	50.589	60.351	58.353	73.765	52.803	63.238	58.281	81.385	55.207	45.637	53.798	49.253	58.008	47.355	66.096	46.314
65.167	51.387	54.638	70.077	55.068	68.13	52.882	74.351	62.114	76.919	53.114	59.43	53.798	59.598	58.008	59.541	62.522	52.47
66.289	77.507	82.773	74.26	73.587	90.993	68.449	58.4	74.813	63.154	87.513	70.462	81.58	78.518	76.888	83.59	58.258	87.704
69.715	39.847	51.649	54.331	40.447	47.851	52.905	57.483	47.697	52.771	39.292	36.211	34.082	40.129	29.952	42.815	26.887	39.353
48.205	47.007	44.616	27.812	36.609	23.667	34.076	25.342	33.257	18.901	54.993	56.431	36.045	59.295	35.99	59.851	35.244	60.493
76.277	69.42	86.751	51.082	66.72	35.203	64.844	41.017	57.085	34.15	86.847	118.2	66.425	121.48	61.608	95.193	48.757	101.34
127.15	125.92	124.41	95.751	103.12	81.82	106.72	103.81	104.38	86.429	138.5	135.85	125.35	131.06	108.1	134.41	98.313	141.28
127.15	125.92	114.58	95.751	93.613	83.763	94.423	103.81	104.38	107.34	138.5	112.78	132.11	107.78	139.2	127.74	123.74	141.28
151.07	134.38	145.98	108.26	129.72	89.537	117.23	96.709	125.65	89.701	141.51	146.18	125.75	152.83	117.14	142.75	108.4	142.16
151.89	73.073	76.655	82.929	97.56	81.764	82.734	82.973	89.118	89.701	74.605	82.207	78.795	81.171	71.825	66.967	74.699	74.463
151.89	101.48	70.305	106.72	75.85	101.39	84.131	136.38	102.56	150.05	86.998	82.207	94.841	80.302	103.05	67.917	130.88	87.405
136.93	114.44	109.67	115.57	110.48	116.77	113.93	145.14	109.56	150.05	126.24	99.707	131.29	113.69	138.95	110.5	143.88	124.97
98.665	104.89	109.67	100.17	110.48	163.05	113.93	104.87	104.17	116.02	120.82	88.583	109.68	106.22	96.509	109.67	80.574	123.81
85.217	103.36	117.02	92.799	96.304	143.8	89.66	106.34	88.183	123.31	143.13	127.67	123.97	162.48	125.02	151	126.42	143.13
43.532	115.84	100.16	128.35	115.98	131.64	116.53	128.26	125.7	145.69	106.61	92.571	116.07	124.53	120.47	114.11	126.37	95.853
74.577	101.3	85.141	122	97.501	118.87	106.04	127	109.2	132.06	100.63	77.601	109.97	77.163	107.88	87.397	101.82	91.784
100.36	84.947	78.625	107.82	97.501	102.4	106.04	111.19	107.76	125.62	75.066	60.726	77.251	58.357	69.385	70.949	59.418	69.595
88.79	89.403	80.985	68.727	93.604	92.756	87.91	79.352	81.161	99.651	100.68	84.033	98.393	86.389	101.43	84.276	96.606	95.986
139.4	90.637	104.32	67.322	82.405	70.112	78.648	79.352	69.323	94.042	109.88	131.55	88.301	123.65	85.089	113.6	90.3	108.65
101.65	100.74	107.99	79.841	108.13	100.12	90.787	87.771	82.634	113	97.818	110.79	92.206	91.748	92.659	98.75	85.088	99.475
126.42	128.42	116.49	126.55	126.59	114.11	136.53	124.45	117.8	131.65	126.44	127.14	124.57	130.67	124.49	132.5	111.08	119.45
72.05	88.735	85.796	80.17	93.24	86.74	81.103	78.026	80.45	74.407	83.63	91.837	84.929	94.52	73.371	83.173	65.534	82.556
130.74	81.522	82.056	73.3	93.432	86.74	71.858	65.314	89.229	64.004	101.65	113.51	98.15	104.93	97.194	102.93	79.262	105.43
97.026	88.341	84.907	68.594	90.373	74.381	74.429	76.387	66.986	76.399	97.4	129.65	81.768	113.36	89.965	103.4	94.059	104.47
84.586	95.02	104.57	84.158	109.36	79.439	99.478	94.999	93.006	107.12	87.555	110.14	95.265	103.61	83.627	96.628	84.193	92.063
85.755	91.578	104.57	84.158	96.653	66.331	98.573	94.999	90.081	92.945	87.555	110.14	84.452	103.61	80.368	96.628	84.193	92.063
133.93	120.19	138.36	96.806	130.76	66.613	112.48	100.08	102.41	97.963	122.94	133.73	124.02	130.09	135.44	114.77	134.49	120.94
162.84	212.97	193.19	201.82	197.29	146.61	193.25	197.98	199.78	206.43	218.08	198.17	213.25	209.86	225.35	215.92	220.77	212.47
130.52	133.51	140.46	152.38	153.17	131.99	148.56	150.34	150.45	143.53	136.11	119.85	133.95	113.75	146.63	126.26	138.02	131.58
108.06	53.477	54.724	47.779	61.891	54.158	45.803	81.081	40.864	87.069	62.117	88.209	54.638	84.944	56.833	69.403	72.51	67.401
33.178	53.477	63.025	74.556	73.834	89.651	80.344	76.75	68.518	61.545	50.464	63.668	50.042	55.118	52.604	57.433	54.71	57.325
49.539	100.73	90.6	95.343	101.92	120.62	89.707	103.47	98.865	115.73	95.695	68.26	99.962	74.601	110	96.032	123.16	94.592
141.95	103.16	107.87	120.81	119.27	113.11	121.64	104.84	123.61	120.52	94.272	77.263	90.236	74.601	88.832	96.032	98.124	96.203
102.25	120.05	143.37	103.53	128.33	99.982	110.43	95.818	107.85	98.667	130.97	171.66	112.47	167.29	100.18	150.65	76.522	142.06
89.778	116.74	99.658	121.59	86.566	105.9	97.732	118.19	116.08	115.03	133.82	173.91	128.55	179.14	134.26	135.88	135.22	141.69
120.96	84.446	96.35	90.319	86.026	96.658	97.732	72.235	90.793	72.235	82.603	95.309	71.5	85.069	74.172	93.957	75.039	86.272
68.944	56.943	66.801	53.203	66.203	34.805	54.17	51.368	54.735	61.253	59.586	68.862	52.349	53.394	57.263	58.812	62.261	64.408
95.609	63.206	59.786	75.822	67.574	73.264	58.789	81.295	65.617	89.123	63.126	70.353	68.652	75.932	71.563	65.991	70.405	65.153
58.881	64.333	59.786	71.544	73.767	54.357	82.19	60.507	88.359	58.062	61.637	70.353	61.722	73.007	56.313	65.991	54.208	63.82
70.42	55.229	56.55	57.502	67.006	43.615	53.192	49.496	59.541	40.825	69.857	58.328	61.935	57.569	61.261	61.329	59.374	64.17
173.58	152.76	150.34	133.66	150.89	110.08	126.75	147.76	144.7	131.3	140.8	170.72	137.98	177.74	150.11	149.6	153.33	144.55
41.222	97.013	111.49	85.84	86.356	71.159	80.439	80.906	86.405	71.56	111.63	61.992	92.141	81.801	83.595	78.428	96.342	98.068
32.12	56.48	59.748	54.158	46.157	71.477	67.968	70.797	66.661	48.16	53.416	43.993	59.365	50.71	51.832	55.651	50.793	51.25
30.17	38.699	34.455	46.157	32.854	41.949	48.708	64.568	42.503	60.674	36.52	32.85	49.478	36.598	56.193	30.364	59.378	34.114
39.717	50.134	52.689	53.182	51.015	41.949	49.705	54.294	49.451	61.645	52.595	58.977	50.484	59.348	56.193	63.237	50.136	63.823
74.525	98.632	82.511	86.375	69.823	83.529	75.002	91.849	83.365	107.16	81.248	69.364	94.382	68.31	94.712	79.362	102.77	79.436
90.806	83.439	78.591	86.375	69.823	88.779	73.515	93.93	76.905	107.16	88.954	141.44	90.144	131.48	96.972	105.64	98.397	102.38
88.696	53.972	49.163	68.714	48.378	68.58	46.077	73.593	59.926	92.446	47.177	60.054	60.387	57.242	61.479	47.016	64.675	50.052
62.504	83.738	84.357	118.17	98.408	97.361	107.8	100.44	107.79	106.44	61.123	55.949	64.314	59.522	61.734	60.761	61.024	66.905
98.419	41.22	43.692	52.255	40.121	54.648	49.364	58.187	45.97	80.794	58.619	49.884	65.829	37.844	60.918	44.604	58.349	46.346
71.847	42.612	36.009	77.303	46.304	60.94	53.766	85.855	63.111	84.225	58.619	25.303	66.549	29.77	66.96	35.782	72.609	46.346
87.1	98.251	89.592	87.736	90.182	94.454	92.313	83.447	83.695	77.321	125.93	139.88	105.52	148.25	114.17	143.95	108.07	137.96
55.101	94.882	79.209	86.912	76.536	90.283	77.899	83.447	82.567	68.174	97.406	65.49	107.89	71.98	105.25	95.921	96.213	93.079
63.934	104.93	99.969	100.84	91.68	68.881	91.867	99.329	97.982	79.749	97.678	102.93	89.721	78.201	83.506	100.93	70.922	105.16
86.225	128.01	113.91	137.26	101.4	98.59	114.94	124.85	138.83	95.347	136.99	110.08	128.68	110.17	117.03	123.76	130.77	137.87
62.044	101.66	109.42	101.65	98.176	83.197	105.54	106.19	103.7	107.69	111.2	133.19	119.18	117.9	110.3	120.99	116.3	114.23
116.69	108.28	128.62	103.39	101.66	88.286	99.468	99.639	103.55	106.83	103.42	146.96	91.487	138.72	83.184	131.78	77.603	114.66
109.27	118.55	128.62	114.55	115.57	77.42	121.29	108.45	118.28	106.48	132.4	146.96	117.95	138.72	137.24	136.09	149.77	138.07
124.72	116.17	103.69	132.02	97.605	97.411	111.14	110.36	122.23	108.07	132.4	130.52	117.95	129.43	112.55	136.09	111.77	138.07
164.17	97.044	102.23	120.89	162.17	141.73	126.86	103.44	116.72	116.56	119.93	115.57	103.27	109.13	107.61	113.34	110.57	120.03
100.43	67.673	65.826	88.994	79.873	92.6	65.839	104.73	72.647	101.27	86.321	79.177	71.64	81.735	77.945	81.474	85.175	88.917
84.746	103.87	117.91	88.696	112.79	90.788	106.51	85.248	97.794	77.31	95.575	83.331	89.152	86.29	84.408	93.845	85.175	99.246
81.455	82.811	97.528	91.351	101.6	116.88	91.702	77.373	92.305	69.784	80.109	90.519	91.733	86.031	96.454	81.495	89.714	71.109
96.316	136.16	150.38	155.55	152.45	116.88	154.67	129.82	150.2	138.99	108.74	128.4	126.54	112.5	117.89	118.83	116.45	106.15
99.242	67.264	42.968	79.855	66.499	69.073	63.78	91.356	78.133	122.79	67.279	56.752	69.516	52.547	79.626	56.175	107.31	64.924
95.875	79.73	89.462	86.628	116.9	141.82	110.18	69.602	92.473	47.683	66.938	69.024	62.206	76.958	59.147	72.936	52.919	70.944
100.76	95.406	101.45	90.764	98.495	79.596	111.08	89.272	88.9	92.993	93.805	106.91	101.2	96.025	106.53	88.086	114.81	90.11
167.4	124.3	118.83	99.07	99.148	88.826	99.287	105.35	107.7	106.5	142.57	143.8	135.14	142.52	132.74	145.97	129.52	145.63
143.15	133.67	118.83	102.97	112.3	112.78	99.287	96.452	110.72	87.336	154.43	152.38	142.44	160.77	153.28	164.23	161.85	168.71
20.944	45.049	42.407	48.642	35.7	43.807	42.389	43.945	46.618	32.821	39.819	41.151	44.752	33.775	46.057	36.152	43.171	36.114
46.705	94.521	81.635	93.907	79.297	80.476	79.612	97.733	93.131	81.443	87.839	60.821	101.1	66.951	97.821	75.974	94.36	76.3
46.494	68.938	75.86	66.129	59.788	61.106	58.213	85.467	63.699	87.359	90.618	79.966	72.2	72.997	74.089	83.817	80.417	98.718
70.212	59.308	68.334	64.236	59.788	45.425	55.559	65.872	56.962	70.93	66.593	91.729	62.98	88.584	64.374	79.235	77.726	66.679
97.755	76.264	89.053	84.526	86.209	89.584	90.723	81.621	89.471	80.644	65.588	75.8	75.705	80.363	74.633	72.056	81.857	68.572
134.65	59.904	60.752	73.967	69.75	77.254	57.458	74.105	72.052	83.398	57.797	64.335	56.756	61.699	47.076	72.056	62.321	68.572
55.587	58.064	49.724	67.532	49.393	61.512	56.079	66.149	60.786	84.773	72.401	55.166	85.913	58.85	82.14	73.997	83.009	67.765
86.409	82.636	85.878	81.024	101.69	87.786	81.336	89.713	82.86	93.292	93.865	93.6	106.48	92.617	104.06	84.283	107.95	86.701
49.17	69.128	66.4	57.512	75.983	73.491	65.124	46.785	66.447	55.381	68.265	77.023	58.037	83.1	46.642	76.86	43.221	75.264
49.17	70.568	69.996	72.334	75.983	85.656	67.321	65.904	68.391	57.53	68.265	56.335	64.087	56.181	68.396	71.658	63.897	71.39
133.07	103.54	90.46	120.33	90.043	98.132	104.67	131.67	121.59	133.48	106.14	65.476	111.7	63.887	118.57	98.076	122.35	98.571
94.538	175.72	155.98	169.18	151.3	148.4	149.51	176.81	159.48	176.14	165.56	162.01	167.33	160.26	158.59	177.34	161.91	163.37
108.32	93.944	69.421	111.32	85.848	145	97.362	126.63	95.419	135.2	90.34	62.382	96.716	64.34	107.26	74.624	123.22	92.703
79.45	99.829	80.412	118.32	89.664	119.89	109.32	131.74	108.5	132.97	92.238	69.535	106.83	71.506	110.8	79.216	97.893	81.705
107.23	154.88	154.48	120.4	135.26	119.89	137.15	131.74	128.33	132.97	190.53	186.32	142.94	195.39	125.16	188.2	121.64	192.47
179.38	118.85	138.64	103.64	130.1	95.918	111.66	99.744	95.926	103.53	147.24	218.87	100.05	206.89	114.29	181.1	139.92	167.75
96.963	89.523	108.48	90.413	109.21	88.441	94.881	91.539	94.749	103.42	94.74	103.06	90.985	91.697	95.752	104.93	100.51	92.527
114.83	145.64	151.71	133.78	132.67	185.29	119.67	145.15	137.25	169.11	156.63	145.63	163.56	131.44	167.58	138.49	177.77	153.63
81.721	64.399	63.196	80.015	72.634	87.018	73.291	85.92	71.996	79.02	66.766	60.221	66.366	65.595	67.8	58.122	73.238	73.218
129.25	76.315	72.308	66.94	77.35	89.033	59.086	80.845	66.23	117.91	93.42	113.76	63.621	112.55	53.99	118.54	61.816	109.55
91.478	84.746	95.836	85.342	91.789	102.53	90.204	80.156	92.348	83.012	90.383	101.93	68.503	103.91	58.715	93.131	50.086	97.486
111.07	61.946	69.648	59.869	66.006	61.784	60.783	64.522	56.095	72.392	65.582	62.114	68.594	61.659	72.319	61.593	65.673	70.218
130.23	116.04	142.31	126.95	137.34	84.323	137.26	111.72	136	93.084	96.752	87.709	106.98	78.101	101.47	94.264	94.194	93.875
98.272	128.02	139.42	118.55	118.39	125.57	124.3	124.58	124.54	106.94	110.1	105.93	130.74	100.06	130.56	119.46	134.21	114.56
41.518	89.551	99.068	83.985	99.566	87.152	117.25	86.77	102.13	99.308	58.772	57.02	59.786	63.778	55.889	63.714	68.36	56.584
86.225	97.312	93.501	95.122	87.26	83.253	88.909	91.15	94.775	99.308	95.496	89.963	89.872	87.778	76.38	90.449	82.578	91.47
86.225	95.833	78.998	67.509	64.706	62.752	52.067	95.101	59.403	112.52	106.61	79.85	106.14	83.377	96.892	98.24	106.19	91.47
85.935	120.13	109.2	118.6	112.99	101.9	103.96	116.69	115.28	146.83	144.79	138.98	139.18	130.79	146.08	147.84	134.44	143.25
119.01	97.389	94.328	89.108	109.85	101.9	103.04	116.69	79.258	128.38	143.25	138.98	139.18	121.88	146.08	129.71	134.44	137.25
107.39	186.14	210.61	177.12	209.83	178.28	226.59	149.55	190.42	140.48	152.65	167.4	134.6	150.1	130.03	166.97	147.62	165.24
142.56	131.23	146.35	128.23	136.18	94.261	128.64	103.54	124.83	100.37	133.1	186.5	116.61	166.74	122.72	158.43	143.65	137.55
120.76	117.72	124.79	109.49	101.11	99.347	106.44	112.56	99.659	114.96	133.1	151.27	109.22	154.99	113.1	146.87	115.16	133.33
81.315	108.79	106.43	90.498	102.35	112.11	104.15	87.906	85.681	114.96	112.4	129.2	102.52	115.45	100.68	127.28	103.92	124.43
61.283	71.531	68.342	78.628	77.072	76.458	72.277	86.188	69.806	87.083	72.734	79.1	81.264	52.091	83.148	49.828	79.537	57.534
32.422	69.931	64.418	78.628	80.926	76.458	66.815	78.4	66.989	74.318	82.446	83.755	73.725	78.931	71.745	83.47	65.616	84.523
36.076	80.214	66.433	89.976	71.627	70.796	70.216	102.14	90.137	102.48	82.446	49.134	89.055	57.448	98.715	74.221	97.536	80.669
51.955	60.013	51.634	76.922	58.958	64.153	56.675	83.707	63.066	93.533	51.266	59.848	63.686	60.229	60.584	56.233	60.674	50.534
76.684	75.383	87.647	81.212	93.058	82.062	83.86	82.608	74.899	80.805	78.898	76.551	72.107	71.272	66.206	66.7	71.358	74.752
85.429	78.946	79.307	85.18	85.808	81.742	80.28	90.036	86.511	91.04	78.898	77.813	69.557	67.856	73.973	71.27	68.614	74.752
92.441	81.001	74.843	91.178	81.769	111.52	93.037	83.155	88.466	91.553	91.083	75.619	71.042	87.094	62.244	85.366	66.261	100.38
72.459	69.572	67.148	91.178	87.383	90.933	88.415	88.617	78.063	95.456	65.137	42.993	65.059	42.323	62.244	44.201	66.261	57.507
68.199	90.971	92.462	110.14	130.72	100.15	119.55	79.824	108.58	69.689	81.042	61.19	84.951	77.331	78.302	71.699	87.009	79.471
32.162	44.414	42.462	40.795	38.929	33.045	33.576	40.742	38.164	41.819	57.69	55.105	49.732	57.461	48.839	54.7	53.599	50.846
37.307	38.823	31.717	24.057	24.072	29.667	25.722	27.584	30.434	31.043	52.434	51.054	49.474	57.128	48.839	54.7	46.916	50.846
53.657	26.594	20.111	24.477	20.828	22.864	18.593	28.656	23.866	31.359	31.094	22.953	28.513	24.355	31.5	33.489	28.547	30.383
34.709	27.282	16.393	28.091	21.031	25.942	18.819	35.166	27.976	31.359	30.456	20.064	34.88	19.631	33.797	21.578	34.951	26.13
26.488	17.277	14.634	18.402	17.575	15.308	16.098	21.814	16.003	20.318	16.202	11.474	21.378	11.966	19.092	14.643	17.997	21.035
26.488	16.637	15.416	16.53	17.575	12.543	14.886	15.302	16.271	13.638	18.012	11.746	18.816	11.973	17.83	19.337	19.2	16.828
35.979	27.417	26.222	27.799	28.776	20.502	23.666	24.913	29.77	21.475	26.271	23.777	30.5	23.857	32.101	29.688	31.566	27.743
17.09	25.756	20.653	26.099	23.55	29.067	19.381	27.579	20.561	21.905	27.073	14.143	29.499	16.523	34.959	27.601	29.923	21.723
26.775	44.754	35.415	36.925	38.625	37.068	38.496	40	37.705	34.969	44.12	34.186	49.33	38.195	46.526	37.819	40.531	42.082
27.24	21.034	14.826	25.745	18.447	21.715	15.807	31.159	22.719	25.704	20.79	13.432	28.356	13.721	31.071	15.317	31.798	18.181
31.867	23.173	19.361	26.111	15.173	21.715	16.321	31.159	22.129	29.54	23.571	13.432	29.624	14.354	32.596	21.434	35.486	19.269
38.246	46.743	40.342	39.571	27.763	27.887	28.34	34.224	36.389	32.49	59.416	56.459	47.037	60.797	48.905	62.841	47.935	64.763
83.88	80.148	80.128	58.87	72.299	43.635	65.417	57.142	64.362	49.008	104.27	123.73	78.123	124.95	74.531	117.65	63.402	111.19
94.455	72.344	86.913	81.879	68.717	59.292	74.002	77.773	83.776	63.53	81.969	97.474	66.492	87.687	70.392	94.661	60.13	91.961
50.403	57.884	52.398	69.517	59.909	107.14	60.248	85.662	70.431	110.12	54.479	43.975	54.256	47.896	58.566	53.154	68.734	55.983
65.229	97.662	106.12	143.6	123.03	128.08	135.49	134.87	139	128.79	69.039	58.543	81.425	57.116	80.953	64.912	74.319	69.304
125.14	116.34	130.98	123.06	125.4	135.51	121.94	120.89	134.89	109.48	105.14	95.914	109.92	90.634	107	97.006	110.29	100.15
71.882	106.6	95.338	96.687	89.571	88.275	86.388	115.03	93.53	122.87	100.45	86.969	109.92	79.571	118.38	82.326	128.42	93.523
124.9	68.034	72.859	74.294	67.914	89.271	61.966	81.701	68.181	98.473	70.808	78.979	67.354	96.644	62.553	78.931	68.124	75.662
56.183	59.051	47.19	74.294	49.331	72.524	50.312	80.621	68.181	73.377	73.167	59.219	67.593	64.006	63.665	63.45	67.886	71.846
95.254	79.217	71.126	95.403	100.9	101.48	76.376	102.13	89.709	99.605	88.723	101.95	87.29	89.286	88.422	94.709	72.042	84.56
102.95	99.339	75.687	99.885	100.77	84.108	96.207	113.93	96.895	124.4	91.091	71.859	134.89	71.173	148.89	72.921	163.15	78.971
55.126	83.258	87.409	80.547	82.219	84.108	90.384	76.973	83.178	90.289	81.7	67.441	91.045	52.543	90.099	64.562	75.763	68.067
71.316	108.6	100.09	125.42	103.94	184.36	123.32	136.38	117.16	165.9	119.94	103.21	111.49	111.45	121.44	111.51	141.3	120.27
46.715	81.359	55.49	94.191	111.11	159.18	95.265	102.82	81.906	114.38	70.636	53.183	80.524	49.411	84.151	64.564	102.37	72.227
59.334	51.722	53.653	60.337	55.677	61.199	53.232	62.675	54.901	70.055	50.131	41.353	55.183	38.23	59.497	58.281	82.848	47.156
71.806	81.37	84.119	103.9	74.695	153.42	75.972	125.04	87.032	100.39	88.473	75.16	92.237	94.096	110.79	80.433	129.13	85.799
65.819	75.593	64.145	81.013	65.357	96.051	68.504	65.905	75.093	77.089	70.491	64.456	67.544	61.363	61.378	78.719	76.534	76.038
65.819	57.345	43.134	77.303	53.458	96.051	57.569	97.602	61.507	98.712	52.781	50.219	60.391	51.355	57.051	48.593	65.414	52.91
86.919	101.53	97.362	103.46	86.902	102.98	97.295	111.38	95.055	130.23	89.077	112.31	95.106	86.75	98.295	88.21	121.04	80.855
73.076	47.438	56.276	37.237	70.618	41.261	44.945	41.159	40.568	38.078	42.573	40.319	48.345	41.266	53.038	41.654	55.234	42.906
48.859	26.316	29.162	20.51	21.842	13.38	20.591	21.668	25.947	20.436	33.354	28.465	33.123	25.853	36.455	28.277	40.461	42.702
48.859	22.595	18.981	20.932	22.427	18.145	20.831	20.192	22.946	15.558	27.421	22.279	23.317	19.117	22.898	19.621	29.3	26.679
18.463	28.299	20.362	23.417	22.427	20.32	23.096	23.131	25.871	16.415	41.978	20.634	40.295	28.217	41.228	29.927	42.134	40.713
14.928	21.791	16.585	20.733	14.909	19.878	18.631	22.708	22.97	17.08	31.397	15.871	29.761	17.897	29.016	20.409	31.883	28.296
21.105	21.791	16.289	21.534	14.372	18.261	20.831	19.343	23.176	17.08	22.146	14.678	26.402	14.838	29.324	19.487	32.643	20.289
22.345	22.189	18.021	21.118	16.33	23.331	22.307	19.404	21.134	22.517	16.492	16.025	23.363	14.02	21.804	18.494	29.814	17.554
42.071	22.189	18.345	23.917	16.562	15.725	22.556	22.943	15.8	16.344	16.492	15.996	23.363	17.019	16.054	16.267	20.055	17.172
43.589	21.55	21.523	22.474	16.562	20.269	17.047	20.461	20.243	15.904	22.196	15.325	25.814	16.337	24.642	22.543	23.497	22.016
26.38	26.523	26.884	28.541	19.983	22.042	24.359	31.348	23.211	24.781	24.061	15.325	35.987	16.337	37.538	22.471	36.699	23.484
10.61	19.984	20.217	18.781	22.416	29.961	21.684	19.166	25.622	25.064	21.173	16.2	19.557	15.684	18.576	31.302	18.732	21.159
25.43	32.418	23.705	31.693	29.701	24.784	24.866	33.397	29.979	27.525	34.444	22.627	33.82	22.491	33.296	39.706	33.948	32.95
29.203	23.279	16.142	27.513	15.541	17.595	22.726	26.484	24.82	22.117	24.499	12.535	27.316	16.591	26.345	15.083	35.759	26.595
12.943	23.916	16.623	25.339	13.742	19.546	13.975	23.104	19.859	20.85	29.726	18.139	29.556	19.701	32.443	36.942	33.503	29.671
36.772	43.367	31.843	50.459	28.333	32.014	32.493	51.103	39.701	47.806	44.533	22.806	54.334	27.003	57.994	36.942	60.925	41.164
51.894	65.847	56.962	51.871	44.489	40.475	47.264	48.994	56.152	41.432	85.17	70.613	72.951	71.97	68.672	78.864	54.466	87.577
64.465	74.887	94.553	60.405	73.73	46.376	59.398	60.802	69.715	62.725	100.73	109.43	70.654	110.84	66.425	94.698	58.249	103.21
55.678	48.314	45.778	44.875	34.916	32.512	43.93	44.744	45.08	45.288	71.765	75.71	54.447	77.782	53.724	68.206	44.115	69.657
92.646	82.674	96.382	93.269	79.186	83.534	80.77	95.634	82.778	107.19	84.796	110.06	71.86	102.81	72.268	91.317	76.211	91.499
82.136	84.766	68.039	93.269	65.182	83.534	77.829	95.813	84.157	111.9	81.648	68.86	81.425	75.263	78.895	76.414	87.019	79.952
111.81	106.83	133.62	94.504	134.17	128.86	113.95	84.974	94.502	78.594	92.511	94.358	100.22	92.205	108.09	89.632	100.51	95.499
65.129	31.154	45.007	38.503	39.14	38.439	34.257	42.288	40.896	57.25	38.258	39.598	46.449	37.597	43.073	35.995	43.344	38.951
74.528	38.424	51.695	41.659	42.765	87.22	40.034	43.067	52.45	57.25	44.35	42.855	43.439	40.22	43.943	42.263	53.58	47.155
65.657	101.46	89.426	99.554	128.05	123.87	101.98	103.71	114.84	100.58	87.022	81.455	88.45	93.838	77.186	80.903	68.729	96.405
108.75	101.46	90.921	99.554	95.673	87.204	99.796	98.509	98.963	97.965	87.022	70.34	101.71	71.961	102.19	79.54	111.16	86.707
92.117	85.843	94.349	101.09	101.01	108.4	99.429	89.141	99.572	87.484	83.062	71.06	93.027	66.282	82.964	76.305	88.265	77.872
79.736	61.566	46.319	68.791	55.164	72.653	55.001	70.677	69.644	73.386	66.766	44.056	76.067	36.994	78.656	47.975	75.192	58.278
86.812	147.24	151.65	123.2	152.9	96.443	143.47	106.78	132.86	97.101	142.36	183.48	133.47	156.74	112.61	151.45	92.708	140.53
126.67	71.238	84.571	76.97	83.195	75.061	68.267	97.359	80.936	118.79	80.071	75.255	73.495	73.131	81.196	80.589	98.874	81.588
95.247	84.012	70.541	100.99	103.91	95.735	83.395	109.83	96.921	128.12	96.231	80.093	92.375	79.821	95.202	88.788	98.602	93.507
80.107	115.02	93.212	139.42	117.37	120.39	114.4	120.71	122.6	93.778	94.817	80.528	98.313	91.777	94.89	99.324	85.14	101.43
96.031	101.76	92.824	136.89	153.35	135.17	126.17	120.71	132.66	86.971	79.652	58.701	99.144	74.162	88.739	73.26	82.484	92.801
134.23	86.467	92.824	75.746	109.38	89.262	91.7	79.437	84.084	90.099	85.827	79.627	90.794	88.251	88.739	96.645	88.236	92.801
50.996	64.856	55.401	66.291	60.527	74.691	66.309	69.341	64.068	92.145	66.177	54.093	62.441	56.387	70.96	61.642	79.19	65.068
56.719	56.879	56.041	70.673	106.33	87.63	83.615	74.834	70.972	83.612	55.195	43.096	60.301	37.148	64.475	46.275	78.822	52.262
51.675	67.229	52.14	77.959	73.559	72.184	71.008	89.767	75.383	92.976	58.384	53.535	60.982	54.945	64.694	56.62	63.288	58.844
114.16	122.14	120.83	100.62	108.82	128.74	126.74	95.755	123.97	92.976	122.07	117.32	98.985	118.93	98.911	113.68	103.39	124.31
75.728	93.048	79.475	99.028	83.75	84.593	78.957	92.006	97.623	71.173	91.24	107.4	83.914	105.27	83.942	99.091	90.809	92.4
57.036	113.45	116.1	75.432	98.732	142.15	94.191	75.347	100.8	60.459	110.25	123.36	81.378	127.75	68.706	122.15	75.851	121.41
59.394	74.408	78.562	73.034	65.431	68.602	70.483	66.007	82.504	55.054	67.695	58.11	63.066	62.47	62.772	66.234	62.658	70.52
57.211	99.002	93.127	107.13	110.93	140.41	93.982	102.29	112.72	101.14	90.744	77.457	111.05	73.897	103.05	83.343	93.443	88.565
85.112	135.22	127.85	168.17	142.03	177.16	133.9	191.09	147.99	181.22	112.89	112.43	129.25	112.6	129.62	113.05	140.31	105.73
87.388	101.96	111.88	99.23	117.95	135	99.942	107.15	96.999	97.482	93.937	122.65	107.23	118.36	105.12	106.41	132.56	105.51
76.353	133.22	148.3	98.956	112.55	123.81	116.01	100.17	114.99	70.476	153.23	198.23	107.23	204.87	101.03	187.57	93.731	164.66
100.99	129.18	131.72	98.956	116.22	120.48	120.64	78.737	110.41	85.872	122.82	130.74	119.11	116.75	104.46	112.13	95.091	130.67
104.54	107.4	106.58	106.43	142.25	99.508	108.48	117.2	107.74	119.39	103.04	99.761	113.41	92.167	108.32	97.797	115.12	99.658
114.81	116.11	116.12	122.3	107.05	139	116.45	136.46	117.4	158.95	112.19	86.723	126.84	85.134	139.05	99.846	158.19	114.12
84.932	71.375	61.192	86.894	95.63	100.32	88.944	99.455	79.325	114.09	74.161	58.867	71.078	53.866	67.411	62.288	61.553	62.136
76.942	56.854	75.364	76.461	111.3	103.79	88.551	76.804	77.882	75.228	60.533	67.612	54.511	72.011	45.934	70.898	45.485	63.402
45.926	48.702	70.399	58.38	81.085	105.28	68.866	53.688	65.961	68.477	57.428	61.719	46.192	55.835	42.913	56.882	42.318	58.675
115	147.84	123.91	124.77	110.66	118.73	123.44	137.57	122.81	142.08	154.42	186.67	138.97	169.48	134.31	153.24	123.96	155.77
109.7	72.807	73.082	94.868	75	118.73	82.357	110.66	81.701	115.44	82.169	66.133	79.869	70.008	72.048	63.933	89.016	78.112
104.7	72.639	84.943	66.977	127.95	105.43	74.733	81.229	67.994	98.47	68.627	91.02	67.269	82.744	74.342	72.563	85.798	71.6
113.29	123.19	121.78	153.43	146.86	213.78	131.99	167.11	137.8	175.15	87.182	91.02	108.22	85.902	96.665	80.138	98.336	84.269
98.459	129.91	148.91	116.02	137.67	129.73	145.74	86.839	125.39	117.63	137.08	130.26	108.22	138.02	95.287	133.97	125.84	136.21
120.82	135.7	120.45	94.858	114.2	156.19	97.857	112.73	98.313	119.95	153.47	166.55	141.23	162.7	136.71	138.04	125.84	148.91
70.853	117.29	90.27	101.35	105.78	138.13	100.25	129.33	99.814	121.52	117.44	126.23	114.95	114.03	115.62	104.33	130.57	114.62
130.59	74.246	88.985	72.264	92.28	65.911	89.052	77.106	85.857	86.905	70.318	72.149	68.293	73.352	60.377	74.299	65.656	69.237
123.52	104.87	137.48	103.02	133.56	72.917	123.32	96.048	111.2	90.083	90.809	114.83	109.77	93.826	108.89	87.046	105.22	88.498
69.645	176.73	152.54	156.43	161.87	139.08	170.12	168.39	171.05	171.19	156.64	133.82	157.21	127.82	150.63	145.16	148.45	146.02
80.916	174.44	152.54	156.43	161.87	218.6	167.67	173.93	171.05	170.74	157.56	129.3	170.74	121.98	167.77	130.65	160.57	138.38
83.914	96.992	65.431	90.838	74.213	135.74	85.017	124.24	83.974	60.015	102.73	48.068	112.35	63.38	108.2	78.581	101.37	81.681
21.895	46.222	39.213	45.278	98.941	79.581	56.016	51.189	51.046	40.642	38.228	41.869	50.213	25.906	48.891	35.826	54.393	42.437
15.915	43.682	23.903	33.33	39.21	83.732	38.168	51.83	44.563	30.277	26.439	32.141	45.83	24.121	42.58	30.672	39.803	30.371
12.258	43.682	25.757	33.33	82.925	168.63	46.568	50.914	44.615	24.598	35.835	25.836	42.095	24.121	40.335	37.128	34.249	30.371
8.9528	33.206	37.324	38.732	28.733	43.548	22.537	29.433	34.566	23.014	29.13	33.945	34.155	34.184	35.474	35.598	31.087	41.57
15.603	33.206	30.475	38.732	25.975	31.513	28.337	32.586	34.566	40.167	33.981	30.037	35.244	34.184	35.563	35.319	36.644	42.133
15.603	39.986	34.768	40.621	39.696	35.974	34.87	40.454	41.801	37.611	42.458	29.543	45.478	30.912	45.872	35.289	47.118	40.29
19.681	36.676	26.151	43.941	24.727	88.447	29.948	39.397	38.206	39.709	34.514	23.138	45.478	20.845	45.185	28.603	44.096	35.013
16.914	29.704	25.703	31.293	30.699	46.416	30.174	31.641	41.418	29.271	29.374	21.874	79.049	20.152	37.726	23.651	36.86	30.19
22.347	26.597	18.62	25.602	21.8	46.416	16.721	22.844	25.6	28.06	28.199	20.473	30.777	20.68	30.517	23.868	24.313	26.32
15.926	38.203	30.681	33.634	25.812	61.3	25.251	32.531	35.43	33.207	36.525	23.229	39.73	22.356	38.898	29.523	36.625	39.861
18.695	27.088	29.301	27.757	29.153	38.458	26.86	26.569	27.291	23.566	34.802	18.436	21.417	19.735	32.784	16.322	24.433	23.262
21.09	36.454	26.859	45.494	33.639	90.621	33.452	33.679	38.43	29.652	39.959	34.195	36.404	25.507	38.441	27.666	36.003	27.534
27.953	34.136	29.02	32.204	26.305	40.449	32.097	40.447	30.608	28.338	39.185	31.66	40.176	32.454	38.171	31.627	39.286	31.721
22.815	27.536	19.944	30.816	18.441	33.342	23.107	40.461	25.434	28.651	27.682	19.558	32.665	20.031	36.327	21.521	35.396	33.14
29.547	22.605	16.669	25.112	18.985	20.037	19.878	32.497	22.94	25.746	26.248	14.248	25.915	16.578	23.904	19.478	29.597	23.845
32.097	31.397	26.27	29.652	19.833	39.715	24.57	34.073	24.961	41.317	31.365	18.416	32.852	21.706	34.885	24.145	40.447	31.265
27.046	34.267	32.824	27.247	32.571	61.672	39.38	32.851	32.677	24.072	37.732	25.949	48.669	21.084	42.178	26.553	37.296	35.222
23.01	32.195	29.924	27.113	32.571	24.64	39.38	32.851	31.749	23.751	30.569	22.509	34.157	22.8	32.06	25.395	34.059	41.759
19.878	35.808	36.826	38.052	39.979	54.142	36.729	39.84	44.168	52.912	36.015	19.158	39.975	24.378	35.526	31.146	25.339	22.229
26.736	29.871	23.018	24.755	34.317	39.6	30.89	40.779	28.047	41.463	26.359	31.544	33.213	25.746	26.129	23.522	24.608	29.145
16.42	33.763	37.369	33.529	30.541	55.344	32.339	30.792	29.035	32.704	34.994	30.154	40.702	22.622	37.467	32.761	44.34	32.115
31.045	44.914	57.234	64.25	44.448	46.765	43.961	74.833	67.217	51.479	34.994	21.617	40.702	26.324	37.509	28.675	44.34	32.115
32.085	21.595	23.79	46.57	28.75	19.656	22.855	26.203	29.726	18.546	17.939	23.684	21.346	15.605	17.235	20.508	37.982	19.922
66.306	21.595	23.79	45.645	21.943	25.562	23.714	26.203	30.041	21.089	20.366	24.268	21.846	15.605	21.332	18.248	18.122	23.518
24.062	24.41	21.963	22.438	24.141	40.591	21.451	25.637	25.571	19.637	31.102	29.807	27.667	15.327	26.825	25.249	27.763	45.873
11.682	20.412	17.783	32.64	15.765	24.216	21.959	22.581	19.567	27.42	25.845	25.925	29.276	16.992	22.886	13.222	28.935	20.237
22.185	29.848	22.91	27.137	24.061	44.184	24.179	28.45	28.172	29.241	27.01	22.863	36.372	24.376	31.938	15.537	30.031	33.901
16.403	29.953	29.597	27.137	28.584	24.528	28.406	26.441	28.502	25.13	30.12	22.642	33.36	25.857	35.555	28.505	32.902	31.966
19.328	37.3	26.942	40.27	29.895	41.953	38.7	37.648	35.895	30.138	41.753	22.642	40.618	24.303	40.456	31.956	40.341	38.584
32.549	44.082	37.083	47.699	32.369	40.008	39.813	43.445	46.043	38.733	44.076	28.05	52.968	30.927	45.437	40.801	42.945	44.275
18.378	35.266	27.33	35.477	23.023	39.873	29.643	38.555	33.042	34.622	30.717	27.011	40.289	22.471	31.182	31.907	35.79	33.587
31.377	38.952	31.424	35.811	29.838	37.523	35.953	40.039	34.66	36.775	38.12	26.604	46.275	31.822	40.598	30.587	45.95	45.703
18.342	32.611	28.263	47.572	21.367	40.144	25.612	33.938	37.078	28.978	36.726	18.422	32.001	24.058	31.171	41.59	31.143	30.972
24.919	35.804	26.597	44.218	21.171	33.945	32.218	40.541	33.766	41.107	32.117	18.422	39.636	24.439	34.855	36.247	35.394	30.972
32.866	62.269	50.321	58.307	48.173	45.55	45.421	57.066	60.169	49.639	64.594	41.681	68.612	44.861	65.784	50.004	65.867	59.886
28.69	48.991	44.181	59.737	37.842	47.062	43.651	50.578	45.617	39.7	53.334	32.232	58.448	43.452	54.913	46.456	48.218	50.117
19.479	48.991	40.176	45.268	37.654	52.262	42.755	50.578	34.546	35.524	43.095	32.232	51.429	43.452	45.002	38.521	47.738	42.795
36.587	61.487	47.074	67.469	51.12	51.089	50.673	72.977	62.468	55.625	62.483	37.13	73.174	46.223	67.302	49.165	66.81	67.002
35.397	41.266	33.505	50.605	33.134	43.12	35.223	44.4	40.068	40.401	38.847	26.708	51.514	23.686	45.994	31.772	45.142	34.816
36.066	48.56	38.043	48.246	37.175	93.529	38.908	46.935	54.475	37.699	42.291	40.589	51.111	52.439	47.222	54.319	44.87	37.316
55.139	80.221	66.369	76.381	55.522	65.263	75.821	75.964	77.53	61.779	75.778	50.873	82.923	62.782	86.659	65.975	73.508	80.849
32.712	43.477	37.73	52.392	37.772	38.308	39.714	42.223	45.595	32.642	49.748	30.88	45.363	31.965	43.472	42.786	41.459	48.174
32.05	38.465	37.73	39.723	35.341	32.079	47.202	42.663	36.603	32.642	31.41	28.947	43.75	31.506	43.249	37.041	39.165	33.873
30.889	37.621	33.651	32.283	33.774	30.746	30.278	34.723	33.954	28.099	41.24	30.464	39.055	34.769	36.452	31.355	35.425	42.798
61.519	51.792	51.308	64.744	51.08	57.656	52.925	57.017	65.096	41.579	45.619	37.174	51.276	35.519	47.955	53.61	50.903	47.262
68.626	43.339	49.025	48.766	67.23	43.508	27.651	32.772	66.476	30.137	45.348	27.436	50.629	30.11	42.083	34.212	38.259	41.593
87.577	59.951	59.321	70.077	54.52	52.929	52.835	66.614	70.875	55.422	61.93	36.577	62.318	45.285	60.812	60.747	55.294	51.196
19.599	35.881	29.526	36.317	31.916	34.212	32.536	40.853	34.392	30.201	34.333	25.292	41.482	25.25	42.574	39.062	38.512	33.328
30	36.093	35.133	36.887	35.972	38.374	38.689	37.455	39.295	28.886	34.589	25.823	39.516	27.179	37.394	31.469	32.173	36.775
21.807	44.416	43.34	65.66	43.86	50.182	44.704	54.431	52.385	34.047	42.192	29.196	50.395	25.384	47.43	28.761	49.695	38.285
16.777	35.007	32.094	25.616	28.987	35.302	27.133	32.957	30.372	30.628	29.187	22.08	37.687	20.866	29.608	23.771	31.542	35.231
34.743	35.14	32.094	35.696	39.34	106.01	32.486	34.897	38.12	31.054	38.875	26.41	33.195	23.19	41.749	24.447	23.97	33.026
36.813	36.938	27.762	50.005	35.461	36.186	32.486	36.158	53.571	36.798	42.305	32.122	37.732	34.464	46.312	36.782	35.217	51.525
14.865	35.389	24.598	32.072	24.378	26.232	30.709	31.354	35.844	28.374	34.787	23.891	37.732	28.388	36.84	31.346	33.43	26.237
47.206	68.263	61.318	74.656	61.986	59.267	57.349	63.516	71.803	62.008	59.517	42.485	63.674	55.328	65.866	60.863	60.511	55.386
23.183	35.325	38.265	42.315	27.005	31.904	36.593	46.853	42.396	36.674	33.54	26.136	47.91	36.919	42.771	26.043	42.342	39.269
20.059	35.73	38.265	51.273	28.157	51.657	33.91	38.667	44.677	31.101	35.883	26.136	38.617	24.857	36.52	33.098	33.776	39.269
40.171	49.77	39.036	39.051	61.503	38.085	48.085	39.146	57.747	38.173	50.194	41.74	51.478	41.146	50.146	40.698	45.722	63.555
31.406	81.991	51.16	99.013	84.47	74.362	70.139	59.344	80.103	57.514	77.409	53.089	66.775	57.908	75.175	70.81	69.937	76.95
28.944	59.298	45.024	51.215	56.801	64.837	39.289	41.834	60.818	37.231	42.985	41.177	49.275	41.695	47.517	30.043	57.037	38.775
35.972	59.298	45.024	51.215	56.801	49.805	39.289	41.834	60.818	37.859	65.937	62.053	65.497	55.283	69.786	43.374	63.468	75.689
11.121	27.721	26.491	30.797	27.628	25.115	24.184	25.239	39.38	18.606	26.164	20.072	32.94	26.231	29.231	23.049	27.867	32.483
24.845	36.351	31.586	35.965	33.558	40.246	34.866	40.826	51.958	39.737	43.786	41.373	41.172	36.983	36.28	33.923	40.733	32.483
24.222	44.154	39.848	48.431	40.705	40.246	32.973	35.715	52.541	31.964	43.786	41.373	38.998	30.918	40.1	35.061	41.557	37.036
22.531	39.118	31.995	40.454	40.705	50.765	39.877	35.013	45.939	28.061	36.666	25.79	46.242	29.31	40.1	34.166	39.74	40.464
15.125	31.069	23.558	23.241	34.456	27.549	21.732	20.716	29.687	21.415	24.187	20.336	32.134	26.154	27.617	44.268	28.196	28.883
11.85	31.716	34.369	35.419	33.782	27.549	28.184	28.358	33.503	31.962	34.13	27.629	32.603	21.542	27.912	33.178	31.059	31.587
13.595	31.716	27.671	39.133	29.92	25.205	33.792	37.125	38.78	31.962	35.675	26.019	32.603	21.542	27.912	33.178	31.059	31.912
45.882	39.084	28.763	47.254	36.682	43.125	36.637	44.604	46.394	38.599	35.325	26.216	35.572	27.517	37.79	28.39	34.983	41.76
56.724	22.741	20.067	25.216	20.245	26.603	23.557	25.46	23.497	24.744	22.934	16.244	21.891	20.848	26.291	16.576	23.585	37.56
15.783	24.64	24.371	35.299	33.308	26.603	23.557	29.805	31.337	24.1	27.892	23.645	28.335	14.498	22.398	24.346	26.032	44.621
48.903	34.873	37.443	39.306	27.111	29.314	35.32	44.52	34.691	31.294	41.004	20.581	39.161	21.6	38.425	28.141	40.249	50.038
28.814	27.435	30.166	35.013	18.411	57.498	28.652	31.078	24.064	23.49	24.229	23.856	29.33	17.18	28.999	21.178	32.308	43.203
28.814	28.215	22.19	31.302	33.396	54.733	29.788	39.387	28.989	25.405	23.31	18.898	31.063	19.754	29.76	22.922	27.505	26.811
20.722	25.844	22.758	24.251	28.722	36.684	24.566	26.788	24.591	16.763	24.453	23.367	24.813	23.746	25.801	22.315	26.589	27.226
13.167	29.787	22.758	28.749	34.531	41.705	25.942	29.23	24.977	24.743	20.223	26.024	33.03	23.746	26.509	22.167	22.942	25.774
21.119	41.555	38.742	39.307	40.048	31.242	38.855	40.117	41.622	30.909	44.789	31.497	50.719	37.202	49.732	42.683	44.374	38.907
25.468	54.159	37.099	46.764	42.536	55.19	50.869	51.916	43.771	49.335	40.23	38.615	48.312	47.862	52.3	40.931	47.677	48.054
13.688	29.335	23.893	27.73	17.375	32.067	26.338	35.244	36.303	26.163	19.687	26.058	25.756	24.037	28.879	24.907	32.873	27.93
15.672	31.867	23.057	31.55	29.565	30.435	26.338	35.244	31.44	31.731	29.997	19.096	34.081	19.546	31.994	29.626	35.28	28.231
15.495	16.999	17.62	19.334	19.553	15.146	25.037	19.54	21.062	10.286	16.007	14.081	20.759	13.644	18.402	23.245	18.176	29.377
15.347	23.466	25.919	32.11	19.932	45.241	30.89	26.752	20.042	21.225	22.736	13.422	24.991	17.514	25.949	28.802	25.363	26.079
18.581	33.124	31.289	47.741	30.019	43.125	36.045	34.893	33.932	30.441	35.594	22.277	36.068	22.769	40.925	29.601	38.187	37.755
21.948	29.382	25.934	32.61	29.413	19.16	36.045	29.749	30.779	27.134	30.894	22.277	36.068	22.769	40.925	25.655	34.43	34.113
32.775	25.977	27.189	19.622	35.896	20.551	30.581	21.205	46.214	21.136	26.552	22.501	37.242	14.206	33.723	24.92	34.261	31.118
32.838	23.617	20.676	25.709	41.087	55.425	30.99	30.863	49.559	21.354	25.74	18.125	29.186	30.97	31.492	21.793	33.43	48.93
29.319	63.479	61.31	58.705	55.981	43.845	55.154	51.626	72.08	50.661	62.207	44.64	78.783	41.218	76.95	57.267	64.874	68.31
24.994	76.383	63.953	74.221	59.105	55.261	64.522	72.934	70.353	68.478	71.115	57.048	83.219	56.244	89.737	65.446	81.792	69.107
22.912	25.566	24.89	27.613	22.735	22.196	26.545	36.082	22.684	27.027	25.747	16.253	34.8	20.798	30.743	29.548	30.445	23.265
22.912	42.186	35.061	46.563	41.001	31.127	42.355	39.838	41.485	33.723	39.988	25.577	46.062	32.002	47.2	37.711	40.178	34.494
12.699	19.761	17.404	33.021	21.988	19.104	23.344	19.166	25.662	17.6	18.354	12.749	20.094	27.477	21.35	24.088	19.445	34.2
28.861	24.808	18.317	33.021	22.299	21.188	28.859	25.124	23.432	29.141	25.946	26.65	31.356	26.923	37.868	24.088	31.383	39.346
70.325	59.278	55.152	55.72	45.068	54.548	49.052	54.735	53.788	50.698	56.346	53.633	63.865	47.342	62.435	49.425	63.004	52.312
24.453	31.628	31.268	32.522	22.458	29.859	30.049	31.919	40.989	39.957	29.561	18.64	37.559	21.413	33.121	26.829	34.458	27.739
18.722	24.453	23.92	32.522	23.087	30.053	27.249	34.665	36.084	25.455	17.909	16.31	26.38	12.285	21.298	17.815	28.943	15.877
23.495	47.37	32.21	54.703	35.136	87.877	33.55	38.636	45.278	48.962	49.502	39.173	42.162	37.805	42.193	46.614	41.496	76.351
18.045	24.919	27.25	24.659	18.904	25.597	25.227	22.639	27.756	22.9	26.998	16.432	29.939	18.158	31.784	30.957	29.621	38.158
31.346	37.06	30.267	33.87	32.935	29.576	29.793	31.68	35.017	31.217	34.738	32.191	40.979	27.286	43.821	30.109	43.132	39.989
23.573	41.159	36.099	41.332	34.276	35.325	34.946	37.477	40.547	29.844	45.903	42.755	39.895	33.981	37.95	36.172	43.42	55.655
23.573	33.058	32.764	35.13	27.834	34.774	37.599	31.821	42.239	29.844	32.135	30.981	36.744	23.194	34.563	35.301	36.362	33.606
32.718	39.93	33.567	40.711	36.613	39.857	45.248	52.737	42.239	40.191	38.21	27.304	42.425	31.433	44.305	36.243	51.16	36.423
26.842	36.659	33.567	31.217	46.147	32.73	41.385	40.859	32.273	32.614	41.807	18.293	44.01	24.645	45.324	36.243	42.461	31.933
15.513	42.86	59.619	35.895	47.755	55.765	54.362	44.704	44.568	36.041	22.821	29.535	41.653	39.173	40.185	22.012	24.925	35.058
19.062	50.178	45.1	53.228	44.733	35.343	48.874	53.862	51.989	42.149	52.212	36.582	58.738	32.474	56.441	40.962	53.34	52.339
22.184	28.385	24.954	23.739	25.383	17.484	19.214	26.209	33.58	22.3	29.588	22.658	31.74	21.15	29.586	25.945	35.72	30.33
9.1291	24.518	28.019	28.951	25.087	17.328	28.318	26.618	36.627	28.567	15.87	23.254	21.463	13.589	17.851	31.904	20.494	18.488
27.501	45.915	47.72	59.366	44.262	30.267	43.224	49.752	47.929	36.562	43.531	24.619	57.948	29.417	52.443	31.904	48.008	41.352
24.851	30.045	20.021	30.708	25.605	24.242	55.419	45.491	26.282	31.182	31.776	20.382	32.15	18.821	36.861	21.385	37.363	37.673
33.397	62.376	57.111	67.429	50.511	70.56	74.147	59.667	57.733	48.848	48.159	36.604	50.158	44.978	54.079	52.867	65.846	61.292
29.549	39.294	34.928	40.77	35.314	59.506	34.102	36.213	49.3	31.908	40.101	26.311	51.772	23.452	47.684	35.946	40.644	32.792
13.27	33.799	21.851	29.153	36.204	27.746	36.651	32.555	27.107	21.774	42.386	27.138	42.154	23.452	32.637	20.143	39.62	35.943
61.51	46.47	37.464	45.283	40.061	56.687	42.917	46.091	56.582	45.886	42.811	36.98	55.421	35.097	48.753	44.321	46.431	41.975
57.756	44.152	44.075	42.349	34.338	58.266	42.483	43.35	53.592	36.756	42.811	33.458	56.018	35.476	50.141	45.366	46.431	42.13
39.021	79.269	65.744	78.712	76.781	78.066	69.23	81.895	83.755	64.944	81.492	54.5	104.16	57.476	86.036	66.667	93.432	87.356
26.427	35.728	29.908	41.946	29.746	34.705	32.467	39.263	37.67	36.26	39.806	28.177	44.499	19.553	41.132	31.332	41.224	33.843
141.8	50.486	46.582	55.218	49.899	41.729	47.244	58.27	68.882	43.588	50.2	31.235	53.149	34.212	52.878	39.788	50.926	45.381
368.84	169.2	141.71	185.09	94.427	100.41	135.06	194.69	181.26	153.17	158.47	116.24	152.13	101.76	145.84	167.26	169.36	160.48
41.729	41.031	30.828	41.277	37.627	38.006	34.028	47.524	42.038	48.035	40.854	21.187	49.561	24.691	52.987	35.911	56.616	39.476
40.198	41.031	30.828	41.277	37.627	32.336	34.028	47.524	39.384	45.521	40.854	21.187	49.561	25.993	52.987	34.905	47.952	36.304
61.506	47.142	35.835	47.165	37.155	34.511	57.059	62.982	50.782	45.521	35.782	28.105	57.921	29.377	56.366	34.911	47.089	34.242
26.752	51.957	47.351	58.048	44.49	35.373	41.741	46.004	55.087	40.598	56.255	44.342	64.528	37.594	52.138	43.251	62.758	54.136
117.99	73.118	67.459	76.745	59.662	47.055	60.512	72.04	77.959	57.691	73.316	50.39	84.774	50.149	81.445	70.409	77.802	71.055
28.237	52.545	41.067	50.909	46.6	43.538	44.997	51.301	45.578	40.737	51.578	33.858	62.349	32.269	60.95	60.18	52.305	52.666
15.869	20.044	15.672	28.072	26.597	24.173	15.691	19.966	23.884	21.042	26.004	11.248	27.873	18.738	28.078	21.812	25.197	20.98
19.093	28.334	26.273	34.106	25.537	31.668	27.454	30.397	30.088	27.272	29.75	16.401	31.355	16.083	30.369	25.38	28.567	26.649
18.743	27.152	23.458	32.369	21.478	26.335	24.088	32.026	30.715	32.358	27.312	12.888	31.583	17.684	31.224	20.67	31.578	21.769
14.924	21.837	21.443	24.347	21.478	18.04	21.698	23.622	24.656	21.8	21.37	15.818	25.735	21.585	24.107	20.67	23.067	19.982
34.812	40.973	37.859	31.492	28.255	53.751	38.274	39.978	40.604	47.099	36.088	25.745	47.914	32.71	39.453	42.291	39.138	33.147
21.965	33.272	26.848	57.616	28.041	36.641	29.268	33.687	36.274	29.636	37.429	23.829	36.788	33.402	34.768	33.092	39.053	37.647
35.609	32.392	27.7	42.811	25.083	26.776	25.181	26.418	30.746	29.636	36.233	22.214	39.407	20.479	34.727	33.092	32.044	29.204
29.076	48.598	43.246	53.234	54.364	37.024	45.603	43.059	55.368	46.429	52.55	33.347	62.383	32.049	54.275	52.073	54.713	40.179
50.269	49.444	43.246	52.241	70.497	40.828	47.388	52.324	55.368	54.061	49.566	32.23	62.383	33.095	51.349	42.655	52.66	46.722
31.047	39.555	34.003	43.275	39.964	32.555	42.714	42.731	41.584	35.658	39.757	31.54	36.7	24.644	35.983	38.908	38.727	39.834
60.246	43.868	42.583	37.898	40.081	34.573	45.125	39.896	38.274	30.284	52.038	37.044	54.502	45.861	53.893	36.811	49.913	59.156
14.696	36.449	36.384	32.433	30.777	29.627	28.948	33.971	33.082	26.208	28.857	29.64	42.478	18.152	40.857	24.995	33.376	41.213
22.191	43.324	39.166	41.479	30.877	38.281	41.608	46.566	43.981	43.188	46.271	29.084	46.708	27.967	46.095	45.422	47.091	44.757
65.744	43.324	39.166	41.479	31.387	38.281	44.032	46.566	36.538	33.694	39.763	29.437	46.708	36.394	44.508	42.636	42.359	37.31
35.529	54.698	48.381	58.803	48.132	66.266	47.838	53.116	53.242	43.701	56.479	41.017	56.506	39.801	58.49	48.686	55.504	57.312
34.614	39.818	36.486	40.22	32.58	27.705	33.847	37.367	40.566	39.137	49.109	28.878	51.842	31.305	44.161	39.882	40.531	38.822
50.873	27.412	26.47	26.885	20.521	21.559	31.438	33.54	25.473	22.557	31.415	27.09	29.884	31.502	34.66	30.308	40.33	33.624
29.767	43.306	32.218	53.873	39.764	40.222	41.44	57.103	40.923	45.531	31.96	27.09	43.095	27.752	39.828	28.028	47.381	30.701
40.646	56.949	49.213	59.778	45.575	62.336	46.395	67.619	58.019	60.355	51.359	37.755	63.912	34.714	64.361	51.235	70.62	46.69
37.649	38.763	29.902	37.383	37.44	29.308	30.01	42.908	40.445	37.911	29.295	30.095	45.704	22.251	44.968	27.681	45.269	26.806
28.69	29.256	23.41	34.639	27.17	29.308	30.722	36.643	30.634	31.147	25.947	18.588	37.982	22.847	38.348	21.297	31.842	21.106
40.718	36.236	35.684	41.975	27.17	21.507	40.666	44.952	47.302	31.407	26.354	18.588	39.042	23.977	38.348	30.898	35.243	28.132
63.526	27.736	24.485	28.941	23.163	17.157	34.33	22.942	21.141	33.161	21.381	16.006	34.773	23.619	34.245	24.794	32.399	25.3
22.402	45.257	41.681	40.291	34.569	51.33	44.316	40.207	42.212	37.242	29.864	29.32	48.834	29.634	45.91	44.605	43.663	31.426
31.175	55.171	45.664	44.985	56.162	69.565	50.833	49.31	56.77	43.805	56.285	40.501	58.464	49.261	53.573	47.148	48.845	62.291
20.059	42.527	36.245	44.703	37.14	48.012	42.085	39.186	42.258	42.882	42.27	36.534	49.256	36.958	42.556	37.838	41.689	46.742
25.002	55.304	44.107	51.923	48.268	57.717	40.189	50.77	47.522	42.836	63.932	36.534	55.501	40.356	52.348	48.89	50.948	62.661
23.492	31.116	30.058	34.392	45.675	33.854	27.283	29.922	34.848	28.56	37.221	22.585	30.902	22.622	32.741	27.906	27.468	34.101
23.152	60.809	52.332	55.677	50.432	44.713	59.52	62.747	61.747	44.932	59.966	42.495	64.942	39.016	65.175	51.082	65.559	62.354
29.294	44.441	41.144	41.868	47.09	47.57	41.181	41.153	52.333	33.123	46.519	31.528	49.917	33.371	51.137	39.893	40.264	44.55
24.686	44.602	41.356	41.868	38.878	37.015	44.844	39.651	42.871	36.741	46.519	36.774	56.65	33.371	51.335	40.753	40.681	44.55
24.686	44.602	43.434	46.802	33.624	31.072	44.186	39.651	44.281	37.454	53.892	36.774	59.207	29.031	49.797	40.753	50.23	52.06
33.991	41.076	43.096	45.427	48.646	31.072	44.919	43.609	46.148	38.687	48.224	25.414	53.774	37.326	48.306	33.248	61.855	51.509
20.439	38.272	37.037	42.758	44.207	26.886	39.681	43.609	45.814	34.092	48.224	22.173	54.385	24.481	48.306	42.114	61.855	51.509
16.972	57.131	49.776	49.243	55.054	36.231	41.761	51.968	56.02	57.606	52.882	48.242	61.239	37.753	70.988	39.101	59.026	45.713
26.332	69.728	61.584	73.593	65.699	57.513	62.554	66.62	71.218	57.606	70.541	49.595	81.524	45.174	80.57	75.857	73.702	64.113
44.11	70.952	64.507	77.952	58.173	59.216	62.725	74.105	76.418	62.599	73.453	49.536	80.907	46.76	73.609	56.71	72.959	62.276
66.033	48.533	36.792	44.922	36.455	48.411	39.144	44.944	50.862	37.985	43.401	28.531	52.634	27.733	53.842	37.409	50.182	53.628
17.344	36.946	36.792	33.236	36.377	24.726	32.49	33.167	31.807	26.583	35.284	28.531	41.48	33.648	37.711	37.234	35.357	42.914
39.703	36.946	34.061	33.236	35.344	27.789	32.49	33.167	31.807	26.583	35.284	29.088	41.48	35.672	37.711	37.234	35.357	42.473
39.703	49.674	53.35	45.857	50.006	42.511	41.804	46.555	53.038	42.973	46.417	34.194	51.167	36.283	51.355	41.238	46.376	42.473
48.68	43.69	53.846	42.763	51.685	32.948	49.312	41.731	53.54	40.656	39.892	29.984	49.247	40.668	40.101	38.071	43.347	41.566
57.138	49.451	50.79	49.57	41.713	39.403	49.18	54.654	52.317	46.084	48.16	42.963	53.704	41.409	46.974	46.86	59.155	60.959
58.415	49.451	36.586	46.719	36.617	37.048	42.986	51.954	45.556	42.581	41.778	31.423	53.704	38.26	46.715	46.86	52.845	37.727
50.86	50.658	36.586	48.91	37.908	43.738	49.886	52.809	45.556	42.581	52.625	31.423	65.768	34.868	62.164	43.278	59.668	46.384
108.42	63.428	51.815	58.204	67.603	66.655	72.959	62.876	55.103	49.201	50.216	43.738	74.371	41.042	71.465	49.289	70.178	58.363
65.414	34.969	40.122	30.559	32.011	40.79	36.921	26.471	41.719	27.66	37.462	23.453	42.479	24.989	36.765	29.208	36.749	32.616
35.875	46.353	45.479	50.913	52.94	74.938	47.244	52.773	62.435	53.303	43.79	48.384	54.865	34.825	43.754	40.154	45.954	54.293
31.202	38.898	38.861	36.839	29.466	59.228	39.115	43.704	43.534	42.348	33.101	39.586	47.376	31.754	38.03	27.184	43.569	30.283
44.322	46.374	43.677	46.178	40.678	33.563	36.768	45.367	47.778	36.537	42.535	35.102	46.75	32.226	43.137	38.029	44.109	47.034
43.761	37.211	30.633	36.435	47.804	33.853	33.411	36.354	36.133	34.632	37.235	22.632	42.773	21.4	41.015	28.653	38.301	34.89
46.896	63.239	49.934	66.097	52.788	54.626	56.55	69.742	61.545	58.666	65.228	33.334	75.539	39.151	73.618	48.668	71.309	58.732
37.345	57.512	48.637	55.581	51.964	52.025	51.949	54.481	62.543	53.032	65.228	39.497	65.157	44.707	66.876	54.741	60.76	71.345
37.442	53.129	45.297	44.166	51.606	48.078	49.2	48.172	53.681	43.218	48.513	47.003	62.563	42.085	59.878	47.211	55.41	52.707
20.224	43.256	40.146	40.488	49.742	35.321	47.549	41.286	44.424	31.666	45.431	31.796	48.369	27.887	45.477	42.306	41.391	43.936
27.184	46.174	42.383	54.447	63.087	52.679	63.529	52.836	57.03	43.606	45.431	39.76	49.871	27.887	45.477	34.916	41.391	44.984
41.047	86.704	73.885	106.93	69.719	61.76	88.238	102.5	103.55	69.604	62.916	46.246	88.366	48.206	78.43	58.681	66.886	56.157
46.056	73.67	65.056	70.414	60.246	57.487	61.983	66.279	75.672	52.602	62.916	46.246	81.173	60.21	71.606	71.188	64.194	56.157
18.773	33.93	27.937	33.03	25.392	23.079	27.942	38.793	44.039	36.637	38.711	22.607	41.977	29.212	40.348	30.354	42.064	42.29
29.386	35.462	26.175	34.629	24.787	37.179	27.799	40.935	34.408	51.299	36.09	20.511	39.574	25.179	47.823	42.288	48.963	24.782
37.229	42.24	28.755	41.659	36.633	41.036	29.204	49.947	36.991	58.654	45.058	21.25	51.256	25.179	54.681	33.09	56.757	29.855
34.528	28.382	27.012	25.266	43.02	26.754	24.807	28.9	30.275	33.443	34.058	21.864	33.335	20.997	32.681	25.772	32.008	33.163
21.334	31.057	31.127	26.787	49.618	18.76	31.888	26.175	38.202	16.552	28.317	20.694	30.652	19.231	26.615	29.527	26.828	29.733
20.336	32.171	27.425	28.629	29.969	21.906	28.124	30.943	36.917	26.492	31.362	31.539	31.741	23.877	30.336	27.912	30.834	30.079
20.336	31.344	27.656	31.599	35.431	24.463	27.267	30.741	31.305	29.647	31.362	22.4	30.827	23.701	29.854	26.621	29.761	33.028
30.075	55.607	51.44	55.134	53.647	44.15	60.751	59.005	57.46	39.787	49.475	40.867	60.409	37.698	55.011	47.026	62.358	71.223
41.514	63.942	55.877	59.973	53.303	48.614	57.586	62.347	53.609	51.911	55.66	51.916	67.505	58.954	68.397	56.378	68.102	56.657
19.035	40.885	38.248	42.528	33.697	41.986	40.023	37.59	54.553	29.775	38.032	28.974	43.834	35.587	50.235	32.746	44.53	33.493
58.132	58.417	47.315	57.077	51.348	47.067	52.82	55.064	59.799	57.153	62.045	38.04	63.413	48.145	59.299	58.206	59.781	55.995
28.962	54.553	48.948	50.472	49.843	58.739	58.434	54.043	54.769	50.124	51.006	32.437	59.865	27.975	61.165	59.927	56.942	55.995
19.735	33.028	30.188	35.108	42.306	21.656	33.89	26.662	38.629	38.471	27.995	27.077	32.027	27.975	28.042	39.681	23.327	27.911
25.597	61.622	51.198	47.795	48.115	44.66	53.997	50.756	52.015	44.843	62.173	42.653	70.434	52.627	65.801	49.696	65.143	77.636
25.852	64.348	55.769	66.225	57.503	64.416	58.768	58.152	70.078	44.361	64.821	47.961	70.434	52.56	65.216	55.955	65.143	83.758
23.014	68.806	60.157	59.713	53.685	52.069	59.614	67.418	69.617	49.356	72.237	51.045	70.609	55.956	77.785	58.372	62.637	69.5
28.994	58.32	54.116	54.759	47.728	47.92	45.675	55.872	59.271	48.978	61.592	40.514	67.279	40.913	65.685	58.795	63.506	46.93
25.29	27.822	13.515	28.895	27.317	50.02	24.726	29.129	31.576	28.006	29.378	26.916	30.714	14.214	30.298	33.986	29.118	25.628
39.075	51.513	49.011	46.136	60.873	57.69	42.218	45.348	59.059	38.5	46.664	34.4	53.02	33.32	52.857	40.323	49.058	51.139
30.161	51.513	56.235	46.736	63.3	67.019	48.415	45.348	68.604	38.5	46.664	41.734	53.02	35.427	52.857	50.69	49.058	51.139
40.81	67.494	51.083	66.297	72.571	52.762	72.216	68.041	66.847	44.933	60.708	45.961	72.708	48.419	67.503	53.63	55.564	68.358
61.507	63.846	59.8	66.424	66.154	42.53	61.929	71.715	58.479	57.326	56.626	49.547	68.673	49.84	58.382	54.563	55.621	59.198
21.228	33.552	34.576	34.93	30.649	26.318	32.559	30.74	34.412	28.215	32.187	27.273	31.212	29.861	30.556	33.89	30.86	31.954
18.706	33.552	34.576	35.762	32.276	30.554	32.559	30.74	38.302	28.215	33.69	27.273	34.222	29.861	31.233	33.89	32.519	31.954
22.417	47.243	35.495	45.812	40.309	40.61	38.897	46.35	52.896	51.86	51.815	32.364	56.724	40.901	51.535	38.738	54.638	44.589
14.537	38.919	31.463	41.125	32.876	32.208	32.142	43.554	43.88	39.71	40.111	23.59	46.528	29.038	45.124	37.066	43.696	35.508
53.198	54.89	44.366	52.345	52.527	43.679	51.432	50.779	61.712	50.139	56.547	31.621	63.86	36.918	62.43	64.201	61.389	57.31
32.284	52.505	39.841	50.401	40.611	44.844	39.509	46.467	47.92	58.008	57.031	27.044	63.86	30.444	64.228	49.18	55.792	51.286
32.34	51.955	40.739	60.568	38.313	53.89	44.704	55.882	54.658	57.532	51.086	27.124	59.928	28.981	58.923	42.172	60.01	51.486
22.609	34.625	25.83	33.335	27.597	26.475	27.483	34.632	39.107	34.145	36.306	21.354	35.997	28.516	38.215	31.107	39.498	33.729
17.043	32.225	24.719	32.835	35.432	24.225	25.068	27.062	54.837	24.631	29.396	20.82	35.323	26.889	33.541	30.285	28.842	28.488
24.669	36.93	26.581	34.516	27.72	26.109	29.339	38.87	40.187	33.138	40.438	21.414	45.545	24.004	42.268	30.248	43.832	33.502
12.215	33.6	24.531	35.919	20.113	22.853	28.025	34.413	40.187	22.752	40.438	24.141	36.92	24.666	33.92	41.239	30.603	36.258
23.396	40.371	48.696	40.834	35.105	30.773	32.575	39.058	43.05	36.128	48.295	24.141	52.428	26.985	49.601	33.076	43.831	44.364
33.147	56.748	47.392	52.791	55.42	41.108	47.302	53.652	51.471	41.706	59.022	37.692	65.397	38.993	63.893	51.188	65.871	54.738
33.869	65.98	55.542	59.551	68.35	63.099	49.509	56.443	67.704	52.591	72.107	40.825	78.343	44.598	73.19	62	76.679	66.609
30.04	54.208	50.657	48.559	64.898	46.059	55.868	52.811	56.68	47.948	48.172	37.591	61.947	38.62	52.088	43.981	51.493	46.286
29.393	39.191	32.522	40.732	46.536	46.059	36.889	36.178	44.96	42.033	39.686	25.898	40.268	29.279	37.454	34.753	40.757	33.166
36.12	51.6	42.543	57.915	59.258	56.509	46.295	51.646	60.385	44.517	43.038	30.162	52.571	33.331	48.385	41.147	45.404	50.752
32.201	60.09	59.223	54.36	43.652	95.561	59.433	59.936	60.143	48.125	52.641	42.911	61.444	40.178	71.113	48.596	67.958	56.733
55.019	39.255	32.901	44.294	33.121	33.168	41.394	43.154	42.975	45.605	37.139	22.906	51.597	23.555	45.211	43.774	44.376	33.369
23.246	53.22	54.663	51.563	50.985	50.573	56.31	52.975	58.468	38.655	51.91	39.016	58.098	49.008	52.933	52.066	54.155	67.403
30.745	72.517	67.693	68.436	64.325	55.044	62.403	65.515	70.371	56.803	70.651	60.24	79.875	49.555	74.913	59.453	77.664	62.257
38.387	61.098	49.344	57.675	50.332	42.523	56.309	57.413	59	48.54	53.687	40.625	66.077	46.51	62.169	59.453	62.688	59.071
83.786	71.109	65.732	80.127	60.273	50.517	59.839	87.157	84.812	53.574	69.03	43.309	86.864	44.641	83.565	74.3	74.893	59.758
29.06	42.659	33.377	41.178	29.457	33.919	44.297	47.944	41.213	36.109	53.697	31.066	48.975	28.544	50.164	38.355	47.14	47.187
42.503	42.659	33.377	40.901	39.343	37.69	35.05	47.944	41.213	35.382	47.702	25.837	48.975	28.544	50.164	36.838	47.14	41.621
33.758	37.003	28.431	44.33	28.92	38.427	33.837	43.193	40.605	38.127	40.156	22.444	47.204	22.895	50.7	37.605	48.81	35.065
31.966	37.003	28.431	31.285	36.255	31.134	33.837	35.426	47.612	38.127	36.928	22.444	42	20.769	43.38	33.819	48.81	33.933
31.966	41.849	32.541	45.837	38.45	31.134	33.555	46.004	43.217	41.67	44.764	19.969	53.195	25.978	53.834	36.808	55.313	40.115
19.771	23.289	17.56	32.437	20.013	17.899	17.804	29.481	22.229	29.368	24.912	12.08	30.129	13.851	29.23	21.627	33.07	25.009
25.839	36.285	28.33	40.771	30.088	34.706	28.472	44.987	39.75	41.661	36.448	20.172	52.154	20.672	50.478	26.589	50.864	31.99
15.556	46.998	44.448	49.378	42.962	32.614	37.373	45.907	54.454	41.661	48.712	34.801	62.4	39.387	63.058	40.609	58.932	45.627
37.324	60.665	51.425	55.252	52.273	45.957	44.853	50.891	65.631	46.106	63.038	38.069	73.661	41.535	69.082	44.83	71.082	54.603
31.075	54	39.607	55.028	52.988	61.043	44.389	64.079	57.987	66.406	58.217	26.431	78.917	28.785	64.96	40.454	79.722	53.815
31.075	51.379	38.918	43.946	33.809	54.171	37.629	46.066	50.568	49.091	54.642	24.597	72.622	28.785	61.132	40.454	64.58	40.115
76.6	56.395	47.816	53.499	49.438	55.452	49.981	60.549	55.341	49.61	54.642	35.009	72.622	33.889	68.865	49.464	74.518	48.135
48.42	55.949	53.142	51.447	151.6	93.902	66.341	50.721	65.008	45.385	31.386	21.719	53.032	30.684	48.262	42.105	44.403	25.497
25.659	48.535	49.468	58.569	36.765	51.865	43.279	61.999	42.943	42.301	54.946	30.026	52.063	31.627	63.481	48.026	60.186	51.117
26.972	42.841	41.138	49.062	42.073	48.358	35.291	57.96	38.775	46.367	40.31	21.942	46.725	23.174	45.946	34.28	56.328	39.731
14.638	34.206	28.36	45.396	27.881	30.774	32.094	43.558	35.91	42.753	31.375	17.6	38.981	17.397	38.074	26.454	41.096	27.614
28.461	21.598	15.901	24.616	23.433	20.67	18.32	29.817	25.888	37.994	22.296	13.163	27.177	15.619	27.687	18.46	26.503	18.082
28.461	27.915	25.344	26.549	24.251	23.175	24.455	26.21	30.348	24.107	27.427	20.208	31.364	21.854	31.74	23.863	28.696	27.933
29.07	39.651	43.32	35.642	28.971	29.461	36.748	37.463	43.221	30.02	37.366	31.991	45.135	24.788	43.415	34.57	41.943	36.986
27.093	40.653	35.709	38.82	47.027	39.062	36.139	33.965	37.545	37.993	46.057	27.563	45.609	29.653	45.333	37.016	40.876	43.098
29.225	56.534	46.47	46.75	77.317	52.008	52.336	54.412	63.459	43.646	57.481	36.534	81.783	37.814	68.935	46.975	60.053	55.259
45.505	45.167	39.659	34.27	47.54	32.181	39.437	37.02	49.056	29.448	50.359	37.14	53.535	37.814	45.497	39.145	49.971	55.259
84.488	91.722	88.094	86.257	64.496	62.029	82.828	96.009	92.058	73.123	80.068	68.014	104.86	59.174	92.135	73.705	96.804	70.171
32.715	39.665	33.803	34.701	29.783	34.105	42.121	38.767	36.607	27.02	43.216	26.596	49.645	27.237	47.043	34.284	47.116	38.566
64.432	68.361	67.401	83.784	56.31	50.756	54.068	68.222	84.565	60.133	68.765	48.175	82.379	44.731	78.291	54.412	61.998	61.765
39.948	55.59	48.018	62.49	56.31	50.756	53.603	51.137	60.554	52.659	49.532	29.009	68.824	37.404	55.806	41.906	59.642	54.156
39.948	51.05	42.24	43.18	46.082	61.515	43.982	52.875	42.404	44.124	59.7	29.063	60.997	31.628	58.463	44.208	54.404	57.642
42.536	42.194	40.106	47.562	46.082	48.429	38.639	46.847	42.335	42.184	38.789	28.811	51.17	31.628	46.674	44.208	49.325	34.4
26.862	26.13	20.035	29.124	32.523	20.887	25.118	27.526	26.819	24.028	34.009	15.235	30.04	17.442	27.812	24.317	27.931	24.519
16.098	27.292	23.948	25.794	21.224	25.198	31.043	31.185	25.255	16.296	27.849	18.157	33.135	16.652	32.513	21.938	36.293	25.234
15.668	22.405	24.821	25.528	33.681	20.369	21.543	29.056	30.268	19.813	32.443	19.119	23.444	23.913	23.323	22.781	22.757	24.795
30.824	46.876	34.893	41.062	42.463	48.807	41.712	40.892	39.933	45.357	37.483	31.344	54.691	30.566	43.59	49.552	48.243	45.387
28.381	50.86	43.113	46.583	48.594	57.185	46.383	46.081	49.687	50.645	44.469	37.294	53.226	35.547	50.162	50.68	52.153	57.621
23.474	36.616	47.558	36.416	39.605	30.579	29.821	29.943	31.212	24.382	50.207	39.809	39.4	27.209	34.767	33.758	45.957	47.718
44.59	38.849	32.321	38.407	39.316	45.088	36.802	42.838	43.954	36.653	38.836	26.747	45.994	24.422	42.091	31.885	42.261	43.212
41.468	28.77	34.724	30.851	25.977	29.046	30.913	32.087	34.773	24.642	21.925	17.207	37.14	21.248	31.368	29.155	29.889	21.809
62.074	53.724	48.882	54.038	49.306	40.093	42.641	50.519	51.301	41.396	57.302	39.514	57.613	39.714	59.463	50.621	52.534	53.899
36.65	36.964	34.815	41.034	37.676	33.865	35.155	39.851	41.644	34.244	35.655	25.061	33.639	26.865	35.076	34.35	39.09	36.391
31.511	41.954	36.676	52.507	53.223	37.567	47.259	53.153	42.079	37.742	34.849	28.821	48.421	28.578	44.778	32.401	43.66	40.964
17.516	28.208	25.104	32.399	41.134	13.237	28.017	29.279	37.816	22.549	23.892	18.738	31.517	17.484	28.354	25.035	23.833	30.377
20.04	47.856	45.41	49.804	46.099	32.783	44.844	47.917	49.324	37.395	48.567	31.926	49.172	33.209	43.839	41.654	46.074	43.496
32.854	58.508	52.651	77.386	56.259	42.948	63.505	53.83	63.177	46.401	52.723	44.713	63.6	46.946	63.368	46.714	52.369	61.981
18.714	46.28	42.256	47.775	39.367	41.13	46.126	48.716	49.434	44.988	41.142	37.648	52.735	32.867	43.648	45.202	42.57	42.221
14.724	46.28	42.256	47.317	44.951	32.603	46.126	43.937	49.434	30.133	41.142	32.053	52.735	32.749	43.648	43.067	42.57	36.731
20.606	53.692	43.084	55.854	49.379	33.728	54.958	51.356	58.305	35.783	49.101	36.397	61.844	33.857	54.183	44.595	53.67	45.861
22.383	47.617	43.084	39.296	62.301	44.738	44.721	43.488	51.883	35.783	44.845	31.904	51.607	33.857	46.35	39.928	49.766	32.801
14.532	44.861	39.051	36.969	32.828	44.221	37.061	42.806	31.526	35.006	41.503	32.078	48.444	29.372	52.105	39.563	59.211	43.23
22.131	56.747	46.791	58.406	58.21	44.221	44.635	51.033	69.675	44.406	49.998	36.399	56.899	38.762	60.918	44.439	56.298	63.332
19.449	41.422	40.64	39.313	43.514	39.346	48.708	38.467	35.174	38.462	29.823	24.449	44.781	26.111	44.94	22.804	35.289	31.785
17.186	26.307	32.198	20.784	38.466	41.461	28.063	20.443	24.741	23.246	33.899	20.463	37.033	24.732	33.692	22.271	31.446	32.079
17.186	40.949	37.373	41.28	32.254	42.193	38.549	36.296	43.896	34.844	44.022	34.671	44.866	36.747	41.04	40.729	38.524	43.598
30.154	30.192	31.789	29.087	35.872	21.508	26.587	26.321	26.263	30.064	30.937	22.315	29.82	34.514	31.371	29.712	26.709	27.265
32.403	48.695	47.029	46.647	55.319	42.104	53.526	48.537	43.702	52.616	37.738	35.378	51.138	38.449	45.976	37.003	40.856	44.195
32.996	37.856	35.07	46.936	34.576	31.51	43.131	48.053	34.487	40.717	38.822	25.777	45.367	36.655	47.71	29.058	39.486	44.195
32.504	30.671	25.133	24.704	30.273	22.664	27.583	28.093	29.31	20.895	30.754	27.182	35.354	20.927	33.59	26.027	25.547	32.781
38.207	37.582	37.974	39.042	26.223	29.136	50.123	45.33	37.009	21.489	38.179	28.101	42.003	24.473	43.984	36.847	33.025	54.349
52.17	47.125	42.565	44.273	47.247	32.976	54.685	49.213	43.201	30.442	51.314	35.472	49.039	35.935	47.97	55.381	46.379	48.124
39.076	47.125	42.153	44.523	38.411	43.838	53.701	52.791	43.201	30.442	44.82	33.258	55.231	35.935	47.97	49.944	51.255	48.124
46.264	42.838	35.891	43.893	45.934	42.386	46.731	39.861	51.394	32.763	38.295	35.682	46.147	39.841	38.723	38.736	39.014	39.497
25.174	35.622	28.906	39.763	25.227	63.199	31.746	44.468	30.724	31.432	35.242	21.968	38.246	19.176	45.742	24.885	40.241	47.659
25.51	55.239	59.61	54.496	72.17	69.994	60.52	59.967	61.888	64.723	67.228	48.469	53.949	34.14	50.424	48.788	52.323	68.133
37.158	55.239	59.61	54.496	68.716	73.313	48.236	55.274	61.674	64.723	51.911	48.469	67.695	34.14	58.766	43.339	52.058	51.852
28.103	33.389	30.163	33.777	29.607	36.625	30.001	33.762	40.666	33.253	29.918	29.698	36.237	27.202	45.022	31.358	45.24	28.864
23.138	28.659	36.127	33.777	33.318	24.824	30.001	32.078	33.263	28.205	28.053	22.816	29.716	27.263	32.49	28.139	29.432	27.41
18.518	28.659	32.128	28.5	30.653	24.157	24.953	25.893	34.402	25.184	28.053	22.816	29.716	28.635	28.822	28.139	27.127	30.259
18.518	39.749	38.134	37.88	34.249	55.866	34.977	35.769	47.926	34.391	32.214	22.766	37.313	40.945	33.876	32.214	38.466	35.018
32.445	58.589	48.745	55.329	56.134	46.589	44.309	43.127	57.061	49.462	57.895	35.23	63.5	43.9	62.49	51.105	55.891	59.606
24.393	49.901	40.604	46.376	30.409	99.208	44.309	43.127	40.987	51.28	42.742	27.973	54.189	34.849	47.421	40.928	55.891	50.174
31.025	49.057	41.351	51.533	34.651	59.664	42.472	43.853	48.741	40.923	43.516	39.705	53.836	35.685	51.008	41.604	54.928	45.313
58.123	58.33	41.913	63.996	46.483	59.664	43.949	58.094	60.15	48.844	49.774	26.711	60.515	40.054	62.236	48.008	50.524	51.049
54.736	50.953	39.619	58.234	39.109	46.735	43.913	49.531	61.597	45.415	42.677	22.439	59.389	34.426	57.532	37.546	49.433	44.517
21.581	56.039	46.393	58.234	45.297	51.114	59.205	54.843	61.467	47.331	47.322	33.301	59.389	39.776	58.344	37.546	49.433	45.936
41.336	37.31	37.481	37.97	33.594	41.75	36.123	49.255	39.096	38.261	45.942	30.915	42.431	25.783	41.853	35.959	46.069	55.639
20.304	39.662	37.481	33.239	29.406	59.301	33.171	41.443	38.767	34.442	48.939	30.915	47.608	28.657	44.831	37.555	48.996	55.639
20.628	35.372	29.682	33.713	39.606	31.16	28.997	34.512	37.48	27.481	35.916	26.701	40.927	25.976	38.001	29.568	34.521	36.658
24.148	59.33	55.541	58.057	64.917	48.052	56.785	60.507	63.216	70.539	59.35	43.146	62.973	44.033	58.558	57.779	56.181	54.464
24.694	54.572	44.562	50.003	53.959	40.246	45.55	45.162	57.103	34.858	50.068	37.48	68.747	38.442	61.137	72.544	52.302	50.336
25.028	36.97	31.26	34.962	37.524	51.159	33.226	36	34.697	27.795	35.19	29.819	43.745	28.445	37.037	31.059	40.685	38.077
24.494	40.916	39.476	40.358	33.304	39.996	40.177	42.455	40.146	38.194	35.19	36.313	44.652	24.373	42.58	31.343	43.164	38.077
21.661	45.657	51.472	44.315	60.171	39.306	35.402	42.315	43.261	40.203	53.219	36.104	43.563	26.978	41.216	27.65	44.041	58.179
24.358	54.236	39.441	50.909	36.906	43.408	51.69	61.23	48.011	48.783	50.175	35.856	57.351	47.137	49.972	47.088	51.232	55.362
225.9	76.106	56.04	85.9	44.722	70.973	75.79	96.81	84.344	74.93	62.279	54.62	75.699	66.369	80.235	67.428	90.531	61.425
58.937	96.882	72.181	112.39	64.324	77.996	77.312	115.69	97.143	95.962	96.335	48.161	116.92	53.027	112.33	91.086	106.91	83.157
29.22	31.631	31.28	31.663	41.043	31.939	30.639	30.303	40.05	32.45	30.587	20.398	33.677	25.024	29.551	31.802	33.007	31.557
37.797	36.181	37.518	31.663	43.96	39.725	33.621	28.254	39.084	36.448	37.401	23.269	32.851	29.782	38.02	32.664	31.894	41.206
50.253	33.829	33.161	28.85	32.016	39.725	35.434	30.666	28.117	24.921	29.211	29.162	36.249	32.573	35.958	22.429	36.894	23.32
15.085	23.981	25.072	20.655	37.033	40.044	23.013	19.404	22.407	24.216	24.029	25.61	26.979	24.422	23.368	20.723	22.072	20.167
43.601	33.227	28.005	28.807	34.483	28.909	29.216	31.921	31.981	28.801	36.022	25.61	39.722	24.78	36.804	35.921	37.295	41.531
50.565	71.981	69.236	55.757	81.562	38.972	77.492	58.999	60.524	60.584	69.661	59.689	75.037	55.48	74.113	64.85	72.097	66.887
24.465	37.736	34.283	39.627	35.116	42.911	40.252	41.436	36.976	35.195	40.351	29.413	42.789	29.094	41.523	36.518	42.783	47.313
20.283	53.158	40.486	53.829	49.117	54.237	49.547	57.623	47.502	40.143	47.764	29.166	51.181	38.52	54.109	37.803	54.426	43.88
35.114	66.574	55.249	68.632	68.458	72.918	80.387	78.02	74.079	40.377	46.698	38.986	72.713	45.045	68.397	66.087	76.542	40.436
22.363	32.86	29.133	33.127	27.436	41.922	34.013	35.319	23.722	39.17	34.483	20.844	32.078	32.322	32.135	33.584	34.326	39.386
24.282	45.179	33.822	44.739	42.229	34.698	50.253	46.484	45.557	54.709	39.27	27.471	46.886	32.568	44.191	30.825	47.914	47.413
25.226	55.588	39.332	51.701	42.461	41.148	51.532	58.388	47.441	45.904	56.249	34.89	66.328	34.262	57.873	48.361	55.683	61.671
25.226	24.636	27.551	34.85	59.867	25.726	27.883	31.504	28.387	40.23	20.541	12.767	30.355	15.701	27.104	19.924	26.181	22.027
17.976	40.491	37.461	42.938	29.156	29.749	37.69	37.394	34.585	40.23	33.046	25.476	41.719	34.179	37.34	38.329	33.829	42.726
18.948	54.043	51.78	65.518	45.734	49.72	54.47	51.577	65.486	50.032	45.86	43.136	53.532	34.179	44.02	56.769	43.793	45.693
18.948	41.312	52.512	45.905	42.446	49.72	52.947	46.171	60.998	46.061	31.795	28.882	53.532	25.538	37.587	37.654	36.07	37.266
15.927	28.566	29.758	32.054	25.533	22.694	26.444	27.552	32.394	24.716	27.376	27.872	31.371	27.076	30.983	28.831	30.213	29.875
21.33	26.433	26.244	30.119	42.615	20.846	26.366	23.357	25.435	22.575	25.533	27.872	28.153	23.976	27.859	23.694	29.28	26.541
23.126	55.967	45.872	54.904	51.778	47.503	48.849	48.323	55.977	41.799	49.748	42.541	61.834	41.538	57.995	53.617	43.679	42.552
33.342	50.043	59.992	47.181	46.382	39.613	42.184	43.995	47.357	41.541	45.009	44.519	55.378	41.538	53.588	37.859	45.309	54.482
57.701	48.979	68.814	47.181	46.382	35.791	44.677	48.668	53.353	44.205	43.609	30.256	50.247	34.625	39.778	37.45	45.309	43.934
16.037	48.137	41.99	42.906	61.632	64.46	40.214	46.094	47.339	42.451	56.375	55.883	50.067	40.303	41.464	41.877	48.724	74.175
25.805	60.645	49.069	58.966	50.12	41.05	56.164	52.411	59.208	34.449	55.535	43.961	63.282	48.523	57.887	59.086	54.375	56.024
44.539	61.253	49.069	60.098	50.801	52.551	57.351	64.87	59.208	49.655	65.219	35.924	69.754	40.639	71.707	55.591	66.525	67.902
22.964	40.891	31.049	43.003	33.203	35.498	35.099	45.193	44.463	36.594	45.294	26.422	47.259	23.296	49.193	40.836	55.399	37.673
35.251	61.172	56.054	67.919	48.79	60.652	54.942	67.802	62.816	67.607	58.247	33.1	74.976	35.415	79.628	48.452	72.741	57.939
23.987	33.784	24.374	30.484	34.332	58.715	29.542	41.886	42.973	43.63	30.915	17.532	40.175	28.667	40.057	28.343	46.314	28.482
25.569	30.35	24.085	33.28	30.487	32.618	26.672	32.234	36.169	33.945	30.915	16.18	38.299	18.806	37.248	28.343	39.883	28.482
25.569	28.418	23.871	33.28	21.979	25.22	22.041	32.234	28.081	43.371	29.043	16.18	34.222	18.806	37.248	26.211	32.878	26.979
32.805	42.665	36.408	46.07	34.386	43.706	39.801	53.095	43.901	40.722	42.222	23.488	45.046	24.329	40.781	40.686	50.423	38.856
54.265	54.525	44.167	51.633	56.053	45.962	40.286	56.214	49.732	47.682	65.563	31.726	80.234	33.804	78.457	42.303	79.173	57.78
46.767	28.462	24.472	24.196	23.338	32.057	25.895	26.031	26.453	21.905	31.823	32.602	33.478	20.388	33.646	25.118	34.424	31.81
46.767	30.306	28.337	31.034	28.774	53.28	33.005	35.97	33.951	26.697	31.823	20.525	36.672	21.387	32.329	28.921	31.418	29.749
35.153	49.5	76.456	47.587	46.54	45.427	46.585	40.432	46.343	40.56	47.628	40.277	51.835	39.111	45.004	46.178	43.071	48.956
35.153	38.287	28.4	41.097	31.948	27.601	40.249	39.777	37.708	38.642	35.533	26.371	38.517	27.074	40.861	40.224	34.816	41.326
29.497	64.634	62.658	48.34	54.906	43.386	56.889	54.958	61.944	48.79	63.437	48.856	68.836	55.554	69.481	69.553	65.048	56.944
30.018	40.959	48	41.124	33.817	33.214	37.639	40.54	44.973	31.079	38.977	25.24	44.474	25.028	41.7	40.916	40.283	30.141
22.452	39.949	37.156	43.899	25.767	41.782	38.206	42.65	38.952	30.06	39.932	27.802	43.226	29.732	46.796	43.993	34.202	33.95
30.735	56.831	52.729	73.184	55.682	63.203	51.719	67.38	59.753	59.78	57.087	38.395	63.377	43.334	55.219	57.659	58.527	52.444
45.508	53.51	63.063	44.391	46.061	56.477	48.593	49.275	55.236	40.947	53.868	37.776	63.754	39.193	56.109	39.446	53.609	42.366
45.508	53.51	63.063	44.391	46.061	56.477	48.593	44.812	55.236	39.603	53.868	37.776	63.754	39.193	56.109	39.446	60.467	42.366
108.08	60.89	67.994	62.197	69.266	70.126	57.537	73	67.137	47.768	57.329	43.756	66.59	42.693	65.796	45.695	56.429	49.078
100.85	58.712	56.996	61.081	47.2	77.607	63.451	73	58.192	41.577	50.948	45.344	59.686	59.17	61.059	45.695	56.429	43.887
41.359	51.3	45.17	55.033	62.786	45.446	63.451	59.997	58.192	34.533	46.427	36.179	56.033	36.673	53.808	44.418	43.429	43.887
41.94	58.676	48.582	66.903	52.923	49.045	52.741	68.481	66.649	52.38	48.336	29.289	66.085	45.741	60.4	42.172	63.393	59.813
43.649	63.499	49.82	62.591	45.417	39.322	54.232	61.475	65.502	47.453	60.378	36.301	71.739	40.031	63.946	48.216	59.051	63.588
17.476	47.294	39.591	43.767	47.292	34.163	41.619	41.834	59.366	52.553	39.367	27.393	48.643	31.654	37.257	42.287	35.061	48.423
42.485	64.006	54.592	86.018	53.08	56.626	56.973	70.986	75.011	47.757	52.611	37.09	67.616	32.043	65.137	51.408	60.538	57.589
20.628	69.753	58.365	73.029	91.641	76.868	60.053	68.936	72.484	49.936	56.599	38.271	71.563	47.839	65.137	58.341	64.05	65.916
37.225	46.668	75.864	43.596	38.436	32.227	43.338	50.849	39.406	57.412	49.729	29.767	53.091	29.262	45.583	38.387	55.222	46.354
13.267	73.261	66.443	68.461	69.322	93.985	91.037	78.112	63.377	84.34	58.467	42.433	64.635	35.596	62.582	48.938	72.178	59.025
25.555	29.634	29.37	28.576	27.227	27.715	29.697	34.592	28.328	39.563	35.802	31.571	37.876	29.45	30.105	28.354	38.113	39.04
18.699	23.992	20.719	26.957	26.78	26.751	19.878	26.042	21.827	22.547	30.196	18.767	27.711	24.822	27.301	25.899	29.255	35.704
27.516	45.916	51.385	41.774	38.055	33.931	33.501	37.293	41.117	28.945	49.431	43.293	54.149	35.749	47.183	48.647	39.749	52.046
21.404	47.123	41.338	54.298	37.805	40.131	47.285	54.502	50.655	33.939	48.015	31.78	50.546	31.138	48.417	37.493	54.492	41.877
34.406	46.067	46.138	56.531	47.821	36.466	49.203	55.806	56.76	37.744	47.143	27.511	50.362	32.714	53.251	35.357	49.084	41.913
37.431	89.063	70.405	95.4	70.583	68.544	81.036	98.914	88.549	73.889	92.546	51.155	106.63	57.949	103.76	67.639	103.39	82.283
36.303	68.258	60.043	66.031	57.307	66.131	59.092	76.593	63.379	63.28	63.24	53.603	70.525	58.722	63.707	65.394	59.577	59.264
69.355	84.477	67.68	94.058	60.607	74.976	73.151	98.334	83.921	88.869	94.429	66.668	106.55	70.87	99.379	72.768	98.062	91.632
34.396	53.153	62.401	54.86	88.031	46.711	61.602	55.418	58.538	45.251	51.509	34.122	61.659	32.247	56.854	40.196	56.619	49.347
45.784	122.37	120.18	134.53	128.8	135	142.72	132.92	137.65	125.93	117.05	95.503	108.77	111.82	101.85	111.83	89.922	136.2
87.497	130.85	123.69	125.74	187.92	122.53	140.65	126.89	134.9	116.61	127.91	118.22	119.14	114.52	123.76	116.5	119.56	139.37
66.236	95.171	86.904	108.29	121.91	112.36	96.902	119.95	91.708	112.53	101.85	68.503	113.52	74.578	114.4	85.512	113.79	92.974
76.385	84.268	95.739	97.993	117.69	102.99	111.13	81.229	85.741	93.036	87.223	73.022	83.462	78.617	86.586	87.223	85.428	92.974
64.367	67.068	69.262	75.795	89.135	74.659	68.696	83.223	69.318	94.306	70.596	51.154	75.348	54.044	73.696	55.471	102.15	61.009
33.441	80.074	65.426	74.353	82.281	72.917	89.873	93.44	70.275	65.99	76.676	49.96	81.652	53.238	76.918	63.142	69.063	84.92
60.138	92.12	91.263	105.75	89.278	138.82	111.33	93.44	112.62	67.596	108.86	74.663	95.291	83.52	95.434	87.479	93.257	135.03
73.056	92.12	91.263	104.45	92.936	82.79	98.847	98.657	109.29	89.883	108.86	65.354	101.76	83.52	109.98	87.479	130.33	111.78
83.772	60.751	70.876	60.219	66.562	66.502	74.595	62.778	66.88	72.289	62.082	65.738	68.692	75.02	78.887	66.841	83.404	70.993
186.3	152.9	180.06	156.83	183.72	127.39	179.82	135.78	178.22	112.08	141.23	132.41	159.45	125.44	139.89	144.7	117.23	146.53
106.31	195.2	204.09	200.55	187.5	148.51	214.06	147.55	215.25	114.83	194.65	166.27	167	183.55	139.89	203.14	113.46	196.22
57.515	49.67	54.4	55.669	44.729	87.806	47.189	58.692	49.118	73.314	46.355	44.98	47.097	50.829	46.474	52.729	41.713	48.926
78.867	84.237	111.59	103.49	138.6	131.09	132.6	99.89	110.13	82.03	86.512	86.616	76.588	84.435	73.29	87.574	67.689	85.893
82.66	78.356	102.92	103.65	124.24	129.66	122.04	87.61	110.13	101.17	73.745	86.616	83.472	84.435	82.625	81.131	84.061	80.798
129.81	87.547	114.06	103.65	98.895	137.24	111.25	87.61	116.52	102.18	92.065	98.321	83.472	92.071	80.63	86.009	71.303	85.578
208.56	181.16	136.83	179.88	129.72	242.01	145.73	222.8	157.38	202.42	169.12	126.26	206.45	128.91	210.36	152.68	212.7	156.1
162.61	135.12	134.37	153.78	124.62	293.53	167.92	175.07	151.09	171.35	132.03	97.871	136.14	106.53	121.36	119.53	139.29	105.82
149.73	126.11	142.38	159.95	161.35	182.32	172.25	126.86	162.45	78.523	103.33	111.39	107.06	110.79	99.12	114.68	93.452	105.92
152.38	143.07	149.54	125.74	147.9	161.81	148.72	112.69	157.16	73.409	165.12	189.59	129.56	185.68	114.53	191.1	89.375	166.2
156.25	125.87	134.53	119.82	148.68	126	147.96	112.42	139.92	102.18	119.27	97.259	130.64	101.65	120.35	109.31	107.5	111.39
75.042	73.455	87.318	112.11	108.94	106.31	74.866	88.125	71.222	84.268	76.003	75.257	78.715	81.575	74.309	79.719	74.217	74.468
112.43	161.86	156.49	169.79	137.68	124.05	148.91	143.78	140.22	129.85	173.98	145.08	168.86	154.1	175	164.44	151.58	190.42
90.257	101.39	104	137.48	107.27	132.75	117.36	118.23	116.79	114.85	91.587	96.456	92.872	92.46	94.679	88.012	92.607	91.639
90.257	91.638	83.917	69.878	79.987	107.24	68.659	77.04	65.918	105.2	121.86	147.65	92.994	156.18	91.13	133.53	101.86	130.91
116.4	101.48	101.2	101.4	117.95	146.63	104.42	94.027	96.377	87.803	99.409	80.13	103.32	82.059	102.85	93.032	95.767	103.39
128.91	109.69	128.08	135.54	127.3	103.38	153.77	111.69	137.19	108.57	97.953	80.536	103.32	74.169	105.67	81.056	96.238	89.961
81.617	88.025	85.472	96.539	106.6	90.075	111.04	88.161	101.93	117.61	77.613	73.076	83.348	76.305	79.812	73.211	79.845	77.274
144.42	168.61	183.05	116.06	147.12	165.35	135.21	116.41	130.68	138.17	183.76	185.44	181	183.15	187.88	189.42	189.15	186.39
140.13	77.967	73.11	70.289	98.043	154.25	77.148	85.766	67.053	89.393	82.216	86.612	80.284	98.068	85.063	82.898	102.45	85.802
92.055	63.908	77.332	55.644	93.989	81.61	69.619	62.382	60.011	54.499	69.064	62.024	75.263	56.116	74.169	69.673	87.141	73.904
65.135	62.608	100.21	55.644	111.08	146.24	79.337	91.307	51.216	76.304	69.932	59.34	68.143	71.933	82.9	72.698	87.141	83.084
132.15	116.23	133.07	117.67	111.08	124.52	133.28	134.77	98.605	91.023	104.71	128.57	121.69	117.94	119.57	119.69	110.07	127.42
111.46	93.937	77.014	94.165	87.436	101.91	101.2	98.84	105.56	115.51	124.97	108.1	108.7	102.45	110.37	125.38	103.6	131.89
131.55	111.32	118.76	92.578	105.05	91.513	101.2	98.823	109.79	115.51	148.87	160.91	123.46	169.31	113.31	163.88	103.6	157.98
54.38	145.39	140.11	132	131.07	114.47	141.55	147.88	130.32	144.87	140.67	146.65	153.29	143.35	159.04	131.36	186.69	133.96
169.67	193.69	165.88	206.59	155.9	159	175.1	193.68	185.22	144.87	186.73	227.51	205.85	201.6	202.94	183.59	209.07	171.01
87.21	70.374	73.845	69.429	72.52	67.789	78.565	76.52	61.782	99.406	65.849	83.787	68.542	84.642	76.988	77.163	98.24	70.889
81.796	116.86	117.91	116.42	122.05	103.24	122.72	121.9	116.19	105.7	105.12	109.86	107.25	84.642	89.855	100.3	86.033	101.83
174.31	116.86	136.09	124.91	122.05	110.65	132.36	128.07	121.28	148.44	105.12	115.29	115.94	85.883	125.92	100.3	168.47	101.83
94.43	145.57	111.28	117.35	132.49	140.38	113.41	140.83	113.58	164.08	154.5	153.15	160.56	154.98	144.93	151.09	174.25	154.52
88.15	76.256	79.529	95.013	106.2	120.39	99.468	96.485	91.987	120.23	79.427	83.175	82.853	89.067	88.118	81.592	108.52	95.661
105.29	155.17	149.31	183.1	167.47	182.86	168.57	185.75	171.73	150.67	140.14	165.17	138.71	161.04	138.61	149.16	124.66	152.29
119.48	155.17	149.31	164.25	167.47	117.9	168.57	144.53	171.73	152.67	140.14	165.17	138.71	161.04	138.61	149.16	127.57	152.29
155.24	142.02	139.49	112.68	127.95	106.75	123.26	108.51	129.89	117.94	145.72	171.81	147.88	161.58	167.62	151.35	191.54	147.16
108.03	67.032	77.298	72.304	81.677	106.75	73.607	74.28	67.725	91.7	67.226	64.806	71.541	86.877	72.93	66.173	88.092	59.247
155.28	101.25	132.22	120.92	121.68	81.537	125.22	86.291	121.8	90.615	108.26	166.31	87.079	148.32	82.623	135.6	107.6	115.94
145.84	108.98	123.19	120.92	143.19	105.12	151.28	100.14	136.02	89.198	98.976	99.73	103.72	101.51	90.648	96.821	107.6	106.99
54.301	80.649	83.342	87.716	91.003	72.112	90.881	67.736	81.344	83.067	94.522	94.649	86.075	94.434	86.288	93.545	76.276	103.42
138.95	84.19	92.618	98.565	89.169	83.34	98.994	80.941	102	85.357	90.603	76.573	86.075	73.765	78.155	86.298	86.271	88.508
101.92	94.828	96.686	92.434	96.113	85.47	87.04	105.47	82.844	101.58	97.993	98.492	79.321	92.305	74.592	96.973	81.718	100.06
101.18	101.38	109.24	105.04	107.68	121.83	110.74	108.35	104.86	101.58	94.577	98.492	94.113	92.305	98.516	90.499	125.73	100.06
99.267	114.86	109.24	105.42	99.502	117.45	107.31	112.12	103.24	97.353	114.77	121.03	110.73	111.32	99.262	108.14	125.73	108.49
137.12	145.05	125.14	116.81	154.96	196.6	136.1	147.22	129.5	154.53	117.68	124.06	125.46	137.16	123.7	134.75	124.9	140.75
149.63	122.07	114.99	108.62	110.28	105.75	116.61	110.3	120.08	96.575	101.76	112.71	123.46	116.18	123.4	111.99	114.64	97.836
327.64	145.95	212.86	138.02	174.79	102.21	168.11	117.89	149.05	111.59	145.89	190.88	135.34	176.71	123.4	176.55	125.04	167.15
220.64	145.95	158.5	139.37	165.24	108.61	161.23	150.2	149.05	176.93	142.68	171.03	135.34	152.53	127.62	150	154.34	144.38
230.79	156.7	140.52	94.241	144.17	112.14	134.31	92.312	122.8	132.6	168.77	174.53	157.79	172.49	159.53	167.76	157.36	168.77
104.53	156.7	138.95	139.97	144.17	112.14	134.31	154.41	133.19	184.57	173.22	155.94	157.79	150.95	166.33	167.76	192.87	168.77
104.53	82.255	84.907	73.283	78.871	100.74	86.952	86.009	81.714	107.85	93.81	99.326	94.957	96.726	111.86	100.28	150.49	95.621
131.22	109.56	109.18	98.034	113.03	120.66	113.39	91.253	97.207	123.28	121.39	105.47	119.23	109.18	128.69	102.46	131.07	135.87
131.22	81.49	91.207	77.95	82.871	58.216	85.243	67.22	83.083	57.005	100.01	125.58	76.33	114.48	79.435	119.24	79.695	102.85
110.73	115.37	105.03	99.286	114.08	102.73	107.07	107.13	101.82	112.65	128.25	132.55	110.4	146.74	113.98	149.72	96.225	146.87
101.32	77.455	87.283	75.476	93.752	67.89	75.632	74.641	79.019	88.554	65.711	85.533	60.585	82.992	62.389	76.237	69.12	75.989
104.65	85.3	96.991	86.193	112.74	65.604	108.96	82.207	97.316	88.554	94.657	101.21	91.452	107.83	86.376	97.198	90.793	109.39
138.18	99.668	107.74	104.7	130.64	102.67	121.62	94.138	116.48	96.162	91.281	92.955	94.694	93.104	83.553	97.198	73.233	94.496
164.65	188.43	217.23	169.67	230.94	104.96	201.92	112.75	186.98	82.21	185.08	222.59	163.88	204.78	156.17	213.44	142.39	196.17
221.29	184.66	180.66	169.67	167.88	123.91	170.14	149.05	174.56	122.55	172.85	177.83	163.88	190.29	156.17	174.62	147.39	178.19
168.54	107.29	127.66	81.32	106.86	67.09	92.499	86.941	79.896	104.12	110.77	151.68	95.133	152.1	84.409	141.82	81.638	121.45
116.53	86.15	104.78	65.046	98.684	122.81	90.537	72.514	67.629	89.835	89.582	105.98	95.959	104.25	97.917	101.13	95.728	92.5
162.32	105.51	113.23	102.24	148.18	176.16	102.48	100.88	88.402	115.58	121.59	125.28	96.051	143.35	95.955	112.06	100.65	137.65
99.73	124.99	121.49	102.24	115.09	110.79	97.874	100.88	99.576	118.21	127.18	155.11	119.24	150.46	125.84	130.82	137.08	135.73
89.36	90.218	72.222	87.791	60.256	146.64	76.207	87.838	82.875	88.404	89.429	69.8	84.726	83.757	90.794	75.786	96.575	100.78
260.67	162.09	247.98	138.74	226.17	162.17	186.82	130.5	145.86	120.17	184.38	239.7	126.6	263.01	113.14	233.02	104.34	213.03
118.71	102.34	112.57	103.06	104.56	100.35	94.225	122.68	91.288	158.11	109.97	114.5	115.13	121.53	109.39	107.55	107.84	114.02
200.12	131.69	138.89	146.71	150.84	127.27	140.88	155.56	141.84	142.21	132.19	148.18	121.53	135.89	126.95	136.45	116.96	127.43
155.09	86.181	99.172	77.144	94.647	71.965	90.194	83.335	85.772	91.462	82.316	114.07	88.872	107.17	94.49	106.77	98.329	85.69
122.1	104.31	93.803	92.011	91.164	90.659	84.642	92.665	91.541	116.06	127.53	138.96	108.58	137.51	113.43	129.46	101.84	125.46
138.46	119.29	144.43	120.95	148.51	98.512	130.19	92.665	128.09	64.557	123.29	138.96	113.95	137.51	97.309	137.36	72.854	137.4
132.12	118.02	112.43	133.99	104.27	108.51	109.73	127.32	119.74	125.19	117.3	95.001	117.39	105.44	118.42	104.41	106.91	106.34
118.41	123	118.68	136.87	103.41	114.17	128.35	132.66	126.15	130.44	114.35	102.44	117.35	113.02	104.64	116.92	115.24	107.03
166.02	139.01	157.79	136.87	155.53	188.9	137.66	134.18	126.15	142.14	144.24	155.64	158.95	145.27	161.76	132.78	167.52	132.61
187.14	130.22	146.12	113.32	123.18	107.18	135.02	112.78	128.11	119.45	138.65	156.5	154.17	159.76	154.53	155.92	145.03	145.5
237.98	122.82	134.38	113.63	118.55	93.242	120.22	111.69	120.36	127.47	122.51	121.44	131.66	122.44	133.21	121.02	148.53	127.12
157.8	122.82	128.25	121.49	118.55	119.1	124.07	109.38	122.36	104.51	145.24	125.29	127.61	126.29	133.21	126.82	148.53	141.36
116.32	98.059	109.24	129.68	125.38	143.84	138.53	102.19	135.4	94.362	96.473	86.87	97.508	83.572	100.56	86.308	106.5	110.33
91.363	79.365	78.926	90.885	84.657	85.103	91.097	83.373	87.178	76.162	96.473	70.549	84.437	83.572	85.018	86.308	85.598	113.82
124.18	79.666	103.34	69.905	101.43	88.956	88.156	70.73	81.942	82.931	96.939	135.47	97.25	131.01	103.81	108.6	102.36	113.82
167.02	120.98	153.41	101.61	140.87	105.77	127.7	94.443	112.95	101.03	126	139.66	102.45	133.24	109.9	138.38	128.29	136.23
184.46	132.26	145.93	101.61	138.94	103.01	130.95	94.443	113.3	82.262	126	139.66	123.7	152.26	120.25	139.61	98.096	136.13
189.04	139.38	127.69	137.93	115.24	104.97	119.5	154.93	133.08	192.08	139.96	151.73	132.18	162.63	138.41	147.06	157.25	136.13
211.2	121.96	149.95	78.414	124.91	64.013	114.9	75.2	103.49	93.852	132.05	181.41	119	174.56	115.85	149.6	111.27	140.17
165.01	121.96	126.87	117.52	109.49	93.137	114.9	116.24	110.82	132.78	119.09	116.27	119	117.87	123.51	111.87	141.61	122.98
128.83	117.27	104.59	114.95	107.15	101.08	119.15	104.52	111.21	114.31	114.35	111.41	87.74	117.03	85.908	118.92	78.104	107.08
128.83	68.519	95.738	93.533	94.783	117.67	92.399	82.544	101.52	88.205	76.771	105.8	62.934	102.55	63.296	82.346	58.224	92.21
131.44	178.69	161.21	172.48	177.74	120.88	183.19	157.36	179.85	131.96	157.19	122.26	180.33	119.58	184.19	133.44	171.01	147.4
156.69	166.23	164.82	168.23	147.18	156.15	183.34	163.39	163.13	163.42	160.04	169.75	167.77	154.83	167.49	158.64	167.96	160.02
142.2	188.64	148.36	171.92	133.18	140.25	148.22	192.97	159.12	201.63	169.34	167.35	191.55	164.51	194.82	178.05	198.36	173.56
179.17	141.46	154.29	142.23	133.18	134.57	148.22	134.66	147.14	126.13	144.85	143.57	154.4	164.79	146.91	142.43	144.27	147.67
231.94	116.29	127.35	108.34	109.19	93.842	99.276	115.85	103.34	143.6	118.14	163.89	120.99	150.03	154.77	113.76	198	117.95
207.97	152.05	141.09	138.97	133.97	102.13	142.87	125.56	137.95	164.84	167.28	178.22	160.03	164.34	168.98	143.98	158.57	150.29
132.02	97.99	92.415	99.559	83.412	88.526	98.37	123.13	101.2	105.67	99.763	90.711	95.146	87.472	108.05	94.061	115.62	94.103
175.14	97.99	84.441	110.53	88.649	167.59	93.627	99.827	108.26	98.385	118.3	130.7	95.146	117.9	88.631	115.93	87.916	126.48
137.51	90.179	82.601	110.53	110.37	143.14	107.43	102.84	105.53	98.385	80.578	87.149	96.232	93.003	84.112	86.228	84.395	82.389
162.15	150.18	166.8	118.61	168.2	127.05	158.44	105.66	132.97	79.939	139.11	149.03	134.05	137.66	127.93	144.95	116.43	149.3
105.84	119.74	137.18	114.87	121.45	84.735	117.34	115.62	117.3	125.15	126.3	167.52	85.346	173.09	73.013	146.55	71.811	140.45
95.535	92.332	98.951	95.458	102.39	115.71	85.538	116.34	86.807	125.15	96.063	98.42	107.37	102.16	105.96	90.245	111.37	86.872
143.24	180.73	200.49	157.33	194.74	226.16	161.94	174.33	149.94	245.78	177.56	143.16	162.89	133.55	175.27	146.98	203.71	162.64
215.62	188.22	178.85	191.16	178.47	147.98	191.16	163.44	195.99	196.83	156.21	163.17	176.56	156.44	178.23	156.66	151.97	143.14
167.05	124.4	135.25	109.92	131.41	147.98	123.05	109.96	126.26	107.51	125.5	150.06	108.28	153.51	107.36	146.49	109.41	135.75
153.96	56.407	78.442	54.129	75.669	58.135	69.613	47.918	63.692	72.982	74.467	81.864	47.695	84.056	49.374	84.466	60.863	88.371
153.96	79.372	89.021	104.28	98.884	77.657	105.16	99.698	100.09	92.824	74.467	82.338	73.377	80.381	74.81	84.466	87.56	90.282
159.52	66.328	61.605	58.885	46.354	69.686	45.379	76.171	50.309	86.497	75.015	99.285	76.308	88.812	83.045	93.504	93.064	80.434
76.391	90.228	99.439	78.908	107.33	166.42	86.091	86.357	79.428	86.528	105.41	130.17	93.815	111.59	94.497	100.36	84.903	103.93
100.33	99.456	94.002	90.157	78.946	72.421	82.42	84.486	86.19	76.266	116.97	111.96	112.49	123.04	104.72	110.69	95.201	115.96
126.49	99.456	94.002	90.157	78.946	96.275	82.42	84.486	86.19	75.026	107.57	98.813	121.44	92.874	126.57	102.67	120.24	102.87
80.222	96.653	97.947	108.35	87.408	95.608	98.821	115.31	92.296	138.17	87.134	86.958	90.663	77.397	85.979	80.012	94.968	90.108
49.769	60.506	67.315	75.099	67.72	91.493	76.16	83.054	72.003	93.683	56.003	48.992	64.999	49.517	65.939	49.423	83.625	52.122
131.52	118	134.84	121.13	119.8	92.85	135.01	111.71	120.82	95.036	112.72	116.85	120.14	116.78	108.04	131.63	111.9	102.92
180.68	120.7	134.84	109.68	131.34	88.006	135.01	110.84	110.61	121.33	149.76	160.6	127.16	147.02	115.91	142.74	121.91	149.93
153.28	118.69	132.38	130.52	126.39	88.006	131.51	118.07	131.09	123.62	124.54	141.79	114.13	147.02	122.03	123.88	130.72	136.84
159.98	118.69	132.38	130.52	123.06	89.804	131.51	135.45	131.09	164.72	112.86	104.54	114.13	103.4	109.36	113.2	126.47	108.06
133.57	84.931	78.279	92.485	93.696	84.427	80.879	119.82	85.215	156.14	90.6	115.5	95.825	108.22	90.314	90.439	126.47	102.68
113.61	108.51	128.75	122.6	143.04	239.6	119.96	122.29	121.12	123.3	96.371	123.57	96.758	126.21	90.314	113.04	82.34	102.88
138.05	108.83	135.46	132.63	146.78	120.36	119.96	120.17	125.5	101.22	107.67	107.09	114.06	109.06	106.68	123.02	115.06	117.9
151.98	105.49	110.68	104.63	120.36	86.984	110.42	88.025	119.37	81.504	100.09	143.49	76.951	125.65	72.962	134.9	74.806	130.49
132.69	105.49	101.6	104.63	102.27	81.053	107.26	88.025	108.83	81.504	100.09	103.75	74.676	100.99	74.502	104.42	70.604	110.55
40.941	29.545	25.269	31.643	22.33	23.704	23.261	36.446	21.55	43.524	41.427	36.066	43.289	36.861	49.263	38.417	55.229	40.578
68.139	76.455	72.011	68.111	59.329	49.666	55.058	61.113	61.142	55.124	85.182	76.754	79.388	83.295	84.066	86.703	82.461	91.434
72.763	47.506	54.969	38.252	54.301	29.668	42.125	29.568	41.865	29.796	55.03	81.565	47.704	84.343	44.651	77.018	51.036	54.598
72.763	57.454	66.531	39.175	46.116	38.491	42.982	34.666	47.097	28.074	63.783	67.896	58.081	73.797	55.316	72.039	40.388	70.126
43.944	49.113	46.011	45.212	40.323	33.496	35.154	42.675	44.449	34.255	61.803	45.098	60.956	52.322	63.476	58.88	55.986	59.677
45.359	41.993	45.405	32.51	34.886	25.127	34.016	34.84	35.383	30.886	53.342	47.983	49.748	47.142	48.159	47.227	46.718	55.513
53.959	47.245	40.824	46.101	39.744	55.528	40.245	58.053	42.136	58.727	53.607	45.432	47.541	38.361	50.585	47.01	55.461	48.16
51.233	41.451	37.887	40.842	27.309	37.418	37.727	36.404	40.901	33.014	40.988	33.2	44.49	34.401	45.242	45.992	46.418	38.585
72.09	62.727	61.035	50.026	51.175	47.312	49.833	57.731	57.165	54.433	74.712	96.009	63.909	96.917	67.426	84.936	58.321	92.649
75.77	79.096	87.44	73.828	64.975	56.489	68.832	70.846	75.228	59.41	93.247	96.009	68.897	96.917	67.426	97.417	58.321	106.61
62.957	94.984	91.571	84.027	82.16	59.984	82.267	76.341	93.685	69.108	91.987	127.28	84.079	139.35	72.504	120.87	58.455	113.53
146.57	126.35	130.27	116.61	136.83	90.925	119.91	115.68	128.78	121.98	126.95	128.04	129.8	119.46	133.42	122.24	125.62	119.51
162.68	93.659	120.37	94.993	100.99	71.328	104.11	82.171	99.668	93.384	98.141	111.23	79.376	107.77	81.807	109.52	81.027	105.89
221.58	154.8	175.86	130.47	161.94	116.82	134.63	117.52	135.85	121.55	147.03	185.31	127.67	203.47	118.75	187.87	101.53	149.37
123.07	127.62	129.9	101.84	105.47	222.38	107.66	109.68	103.4	121.55	141.27	141.11	132.94	149.54	138.57	132.9	121.3	146.02
89.938	109.6	89.105	137.1	106.42	148.39	116.76	121.49	121.17	133.05	104.24	78.308	122.61	79.884	122.44	83.34	101.99	97.884
73.201	80.335	63.131	92.56	75.631	136.01	78.905	113.02	81.53	134.29	100.28	76.802	81.121	86.936	83.581	90.833	100.95	93.904
100.03	105.71	87.038	104.48	91.499	221.63	91.253	115.31	105.59	141.4	103.75	106.61	109.85	103.22	124.74	112.86	143.58	112.72
121.94	111.16	134.33	128.72	139.81	137.08	132.82	129.92	125.58	156.46	105.68	105.1	112.7	105.84	115.11	105.97	124.58	109.01
147.34	139.52	147.46	128.72	151.19	127.52	158.49	141.74	152.78	133.89	127.86	124.62	132.73	102.62	124.84	128.51	118.83	126.04
133.15	158.66	147.46	161.81	151.19	270.95	158.49	178.6	160	168	164.92	192.01	151.39	185.34	153.39	164.86	169.45	171.87
115.58	141.34	120.12	149.55	135	277.26	142.03	145.14	147.79	119.65	129.84	140.47	123.92	153.07	115.16	140.61	107.36	127.55
122.14	77.537	94.035	78.383	107.89	84.857	100.36	70.677	86.638	63.536	81.703	100.75	67.191	105.44	71.049	102.22	78.798	94.784
81.626	86.09	75.929	128.79	86.769	142.58	109.28	127.25	121.01	104.22	81.703	103.5	84.228	112.06	76.152	98.742	77.934	94.784
125.33	76.726	72.953	99.501	76.387	96.578	82.172	102.44	84.263	105.26	94.297	103.5	94.69	104.81	107.46	84.122	123.86	93.712
188.41	131.85	128.31	157.89	126.5	158.36	141.22	149.02	149.58	163.88	142.9	140.32	137.17	127.49	124.75	116.53	147.66	158.28
165.04	127.84	126.17	95.266	106.97	166.46	106.88	106.15	112.21	141.65	151.41	172.15	128.85	171.13	132.84	156.14	114.14	148.57
148.7	102.16	131.32	97.004	110.86	71.018	109.28	88.799	115.54	89.279	111.97	108.43	88.215	136.43	79.41	121.52	85.156	124.08
96.374	62.674	81.484	92.931	75.899	84.389	97.887	74.348	87.572	75.948	59.533	72.287	60.326	60.794	54.397	62.434	53.411	80.614
125.67	115.41	113.7	124.12	129.73	100.82	137.4	121.48	127.74	114.46	103.21	118.78	110.28	106.94	101.17	103.9	107.68	112.09
173.21	266.33	280.96	222.87	275.42	231.26	236.01	239.96	227.39	238.96	241.74	276.09	262.62	245.54	279.38	243.53	294.3	234.86
231.64	161.58	141.82	121.03	119.26	146.95	111.1	145.26	116.63	152.2	191.54	198.23	182.94	191.25	185.55	184.86	173.1	181.25
57.94	110.54	106.16	121.03	116.54	176.8	113.55	120.12	103.32	122.34	101.92	122.86	103.33	125.18	97.855	118.75	87.732	120
142.37	96.693	100.07	100.87	82.777	81.286	85.56	119.74	78.889	120.91	105.96	131.68	132.63	125.46	126.48	128.38	110.7	126.44
136.28	130.25	124.9	133.62	104.68	210.61	122.46	141.36	131.88	151.87	132.62	143.75	121.38	118.69	122.14	128.89	129.9	129.24
134.65	72.597	84.431	77.142	80.341	66.799	84.825	73.398	75.822	72.45	74.923	101.31	77.218	82.737	85.273	78.241	107.32	70.932
131.9	136.64	138.1	142.73	130.44	114.74	139.74	134.85	141.54	124.15	135.25	109.55	144.95	102.77	149.57	109.44	170.97	140.99
125.35	115.9	150.69	150.45	146.83	119.4	156.05	134.85	150.11	138.76	102.78	110.33	112.16	101.14	123.41	108.35	127.15	101.27
97.382	128.69	124.87	108.65	121.37	89.996	117.69	129.82	112.68	139.11	121.1	106.5	130.7	120.83	136.04	119.58	146.81	126.02
122.18	141.76	142.48	127.8	175.71	173.36	142.29	131.89	132.78	139.11	153.11	180.25	146.5	157.08	163.55	157.91	191.25	172.92
105.73	135.63	112.26	132.43	111.1	108.62	114.76	131.89	125.72	129.33	135.33	146.16	136.37	130.65	143.29	133.24	115.08	132.9
182.3	137.16	112.26	110.62	111.1	151.1	125.46	117.57	125.1	120.57	143.79	118.24	159.68	107.69	147.77	133.44	139.29	134.79
80.373	148.2	139.49	144.67	119.81	168.5	141.7	162.68	137.45	164.38	108.63	141.15	133.81	125.86	147.53	126.18	184.18	115.26
121.35	65.448	70.746	53.71	66.844	95.679	66.853	47.065	60.463	53.396	76.426	83.538	70.32	86.358	80.196	82.293	95.526	76.779
88.078	84.663	80.328	90.71	104.36	137.39	107.07	107.32	92.906	120.43	77.462	86.118	77.903	91	78.371	96.193	83.077	84.849
53.552	91.555	85.324	107.68	104.36	137.39	101.78	107.32	110.03	97.336	80.842	81.668	81.337	65.39	83.604	60.663	78.306	79.605
123.75	88.263	87.95	98.167	94.701	211.16	101.66	94.297	109.67	92.956	73.103	101.52	58.958	114.62	60.748	105.1	65.065	80.713
106.67	94.004	112.79	98.175	107.21	90.997	107.33	83.827	109.67	77.527	92.242	125.36	72.652	125.3	68.764	112.33	69.564	104.46
133.25	134.62	147.05	135.02	143.85	94.83	147.48	114.43	150.68	83.106	162.6	155.22	119.87	149.07	115.36	147.99	110.25	159.59
123.71	157.12	170.11	151.23	175.22	133.69	156.91	125.82	157.51	84.195	162.6	163.65	158.37	168.08	152.56	162.65	153.54	159.59
224.84	157.12	145.82	144.68	148.93	128.53	157.71	158.79	148.24	169.41	156.37	146.27	165.94	146.78	170.5	140.58	181.34	158
234.5	192.46	249.33	199.26	235.13	165.04	238.7	166.51	213.87	172.98	166.39	201.92	159.86	183.7	151.38	178.19	146.41	171.75
289.45	226.03	205.8	236.69	233.19	201.77	203.14	248.37	237.93	214.16	205.08	190.5	229.65	193.73	228.32	212.28	205.39	197.48
27.295	53.557	44.221	56.183	59.04	110.43	47.75	63.67	54.59	56.075	53.402	36.07	61.678	35.849	61.564	48.344	55.084	50.712
129.58	66.796	62.399	70.664	63.066	95.923	64.98	77.501	71.076	69.956	62.402	46.354	74.155	42.87	76.632	64.097	66.649	66.052
171.62	102.49	124.98	75.882	102.1	67.216	92.645	67.011	83.184	60.996	104.53	114.04	107.29	111.37	107.42	111.16	97.577	110.88
96.069	58.694	55.298	71.325	61.074	105.63	63.911	77.125	62.62	79.07	56.057	61.047	61.135	63.925	69.124	52.904	82.975	55.851
124.74	104.58	110.13	91.594	99.737	139.78	95.854	116.82	86.725	149.99	105.45	137.35	115.52	124.32	124.15	108.9	144.97	107.61
121.39	81.684	88.598	84.627	93.211	96.417	93.039	91.143	87.687	114.84	85.79	76.538	81.087	90.156	91.489	77.757	101.71	82.03
155.92	94.396	102.87	95.811	109.46	87.901	104.17	87.987	103.56	96.447	91.663	97.374	81.087	111.43	78.899	103.26	69.933	98.417
89.754	53.366	57.21	54.184	100.51	110.2	69	63.452	58.678	64.423	60.904	69.994	54.855	67.498	48.615	66.563	69.425	67.723
119.33	88.441	100.74	79.904	130.81	127.29	94.08	86.254	80.57	98.4	90.536	157.63	73.761	124.3	68.603	116.8	80.641	93.951
67.755	78.886	95.776	79.904	96.933	113.65	94.08	84.251	80.57	85.355	73.85	72.614	73.761	73.221	68.603	74.086	67.451	80.917
64.404	51.121	50.649	57.753	85.066	67.529	51.739	63.148	51.219	72.046	65.906	82.15	50.518	67.302	48.004	61.45	60.198	67.518
88.585	77.559	77.837	110.93	101.4	121.04	106.94	99.265	101.48	96.357	81.947	107.71	70.391	92.11	66.767	81.611	73.213	88.137
143.93	164.18	187.62	134.36	184.99	103.11	169.71	121.75	146.16	106.97	162.02	187.07	174.26	181.48	171.87	182.84	173.14	167.32
143.93	186.06	187.62	197.46	184.99	201.05	191.97	187.11	184.93	162.93	177.75	182.98	175.68	181.48	171.87	182.84	173.14	198.47
186.49	129.24	141.09	172.34	149.14	191.95	148.52	168.63	159.22	149.94	119.5	130.33	131.2	130.61	117.52	115.58	139.2	125.5
191.99	193.44	196.12	191.78	229.59	191.95	203.79	168.63	189.23	149.94	171.08	171.05	152.5	186.88	156.23	178.31	150.85	168.71
135.38	86.839	96.965	115.09	103.98	170.51	105.71	113.64	103.68	103.71	83.515	72.737	93.178	77.316	100.21	85.073	100.82	81.105
64.011	83.111	69.733	94.242	83.696	77.703	85.414	96.307	93.315	89.9	65.659	44.915	93.178	39.75	91.757	44.95	119.15	52.826
65.162	58.462	70.827	49.135	77.243	40.488	61.807	45.445	57.401	59.642	61.805	107.88	49.716	102.3	45.279	90.978	49.272	82.93
103.63	119.53	135.25	110.23	112.61	159.67	107.73	101.76	108.37	95.243	113.36	125.37	96.4	116.77	90.53	115.39	89.262	110.66
84.76	83.851	122.75	96.161	125.65	97.595	127.08	78.414	107.33	68.275	86.206	94.336	74.932	83.656	66.2	89.984	65.859	89.467
99.241	117.17	109.39	104.28	108.42	153.43	97.83	137.02	114.29	128.3	118.9	91.317	128.02	97.385	102.71	99.47	97.128	115.18
73.758	75.793	83.791	96.363	104.18	101.97	98.806	90.094	96.528	128.22	68.844	63.639	84.165	62.789	87.745	69.528	88.067	62.409
73.43	63.124	70.212	60.327	68.447	59.659	65.052	65.469	61.922	78.269	68.204	84.364	69.078	80.264	73.273	75.443	80.276	71.065
73.194	63.124	70.212	58.353	70.726	59.659	73.129	63.66	65.485	56.098	60.579	84.364	56.028	73.16	55.833	63.802	70.187	60.173
139.9	118.04	120.38	116.42	106.09	152.16	110.69	116.04	108.69	98.034	119.13	127.74	114.51	127.18	117.04	123.35	115.38	134.33
168.3	165.91	120.48	194.37	108.73	166.03	127.45	214.58	156.07	234.29	158.82	127.74	211.19	127.18	229.61	123.35	272.81	146.01
204.31	84.015	79.266	99.964	64.142	87.861	73.918	126.31	83.215	141.06	93.251	73.958	93.049	75.013	106.08	67.054	138.42	91.709
178.15	110.82	170.26	111.85	148.07	73.002	126.13	85.723	120.66	70.788	93.113	146.54	80.331	140.89	85.072	122.71	110.6	109.36
129.23	117.05	124.37	115	113.59	139.43	114.21	129.81	114.87	168.14	134.68	124.38	108.46	144.69	115.38	128.57	142.27	120.49
132.88	76.127	75.339	76.98	74.358	73.913	83.262	76.018	79.617	72.879	76.84	77.994	94.253	93.226	88.865	74.453	82.002	87.712
83.619	68.585	72.489	76.641	84.902	85.287	76.292	74.471	80.998	67.722	66.161	91.693	68.008	90.659	61.044	77.298	69.91	69.307
91.116	80.149	84.216	66.384	74.731	64.569	68.872	62.813	76.897	69.895	88.469	94.255	71.663	89.112	65.634	87.363	59.202	86.914
60.058	31.138	37.898	58.252	40.597	70.086	51.311	63.147	50.476	69.603	34.411	41.754	38.297	36.147	42.051	37.327	50.523	32.593
51.042	29.593	36.892	39.895	40.597	33.474	40.042	42.966	42.068	46.594	30.415	31.571	37.149	36.196	47.337	33.578	50.169	27.288
95.118	31.671	25.49	36.963	23.452	32.593	32.933	45.09	32.463	52.725	34.493	17.702	45.366	21.494	47.337	23.612	61.35	33.41
46.374	31.671	21.837	33.27	36.837	59.536	29.787	45.09	29.875	53.837	34.493	17.077	45.366	24.021	46.61	23.612	48.046	33.41
31.951	22.451	15.953	21.702	17.703	35.76	18.088	23.013	22.218	20.385	28.953	11.483	31.177	16.939	36.028	20.62	43.297	22.515
27.234	34.421	35.006	31.849	29.941	26.194	40.107	36.8	31.832	28.238	28.214	22.056	34.677	29.135	32.625	27.865	29.003	33.906
60.757	49.782	50.162	63.792	50.905	49.115	53.577	67.957	55.395	58.815	45.721	30.159	44.087	37.397	47.841	41.712	50.547	44.457
58.429	49.782	53.508	55.189	50.905	43.303	53.577	57.376	52.526	54.766	47.108	50.793	46.556	50.378	47.841	49.767	51.448	51.199
59.779	73.156	55.815	75.363	59.002	80.12	60.735	86.959	69.833	76.043	71.625	46.344	80.699	53.26	88.868	49.767	89.305	63.681
64.824	76.806	76.808	82.836	73.545	72.702	77.351	86.959	81.891	80.772	90.095	72.624	80.699	86.995	88.868	85.292	89.305	91.861
92.047	76.806	60.95	85.402	67.39	85.528	73.529	86.77	80.247	100.81	78.063	72.624	82.215	76.525	83.208	80.517	91.255	87.28
81.121	72.233	76.246	76.244	67.39	75.848	76.401	74.178	78.903	85.578	83.382	77.416	56.877	82.806	51.529	85.442	54.531	90.486
112.03	72.233	80.169	76.244	81.489	75.848	80.497	69.357	81.47	57.137	83.279	88.572	56.877	99.862	51.529	88.153	54.531	90.486
91.982	72.645	72.792	86.681	65.833	102.65	87.004	99.019	90.283	134.02	63.355	48.805	77.072	47.088	80.121	58.526	98.736	52.78
57.158	72.645	72.792	86.681	73.022	83.939	81.182	99.019	83.943	125.79	71.969	61.866	76.839	69.123	80.121	72.238	95.157	72.255
93.155	100.22	97.918	95.213	113.98	75.247	119.17	100.38	92.678	125.79	121.77	101.03	109.37	111.67	106.19	95.316	107.85	118.07
110.24	83.348	77.736	97.435	84.392	95.957	92.637	100.61	87.15	102.86	83.034	111.76	79.932	101.72	74.034	93.669	73.018	88.125
56.271	61.355	77.14	64.01	104.61	95.582	92.637	58.784	72.956	59.659	61.386	77.32	48.279	75.84	43.253	73.67	43.372	66.217
79.872	49.097	57.514	63.541	91.554	79.962	66.611	59.731	57.722	69.87	45.812	52.263	48.279	47.177	43.253	47.543	40.96	46.536
55.227	80.73	87.203	73.659	106.67	118.45	99.451	70.999	90.115	85.386	74.903	100.41	68.818	90.55	63.502	92.518	57.528	85.142
65.466	72.036	63.179	73.213	55.553	82.611	64.503	78.732	70.505	88.215	71.795	73.868	74.68	71.89	83.213	73.253	95.935	71.554
56.497	63.538	67.741	58.103	61.723	76.795	56.041	63.674	60.146	63.607	77.888	64.081	69.393	80.259	59.059	74.922	70.674	69.831
30.736	26.118	27.559	27.134	32.275	21.48	29.896	23.716	28.708	23.989	32.572	30.666	32.269	35.512	29.269	29.366	36.985	36.31
47.731	28.726	26.97	20.578	26.919	25.888	27.033	22.365	24.141	23.94	33.27	35.828	32.269	47.142	28.116	35.063	33.809	38.089
47.731	33.848	28.597	20.578	23.723	21.723	23.832	21.289	24.141	24.147	43.725	45.867	34.816	53.399	28.493	45.566	31.029	53.335
34.68	46.979	44.814	38.001	42.923	26.706	39.357	30.831	40.086	27.537	56.47	58.171	37.382	62.027	33.912	56.275	38.062	59.836
26.171	22.921	23.417	21.692	33.781	19.48	19.422	23.823	25.464	25.034	31.864	24.89	25.839	36.06	24.052	31.106	20.949	34.796
47.988	21.902	21.693	25.786	22.779	20.495	21.915	29.953	22.731	31.594	24.318	16.659	24.274	20.445	22.324	24.257	21.019	27.622
54.584	30.177	30.615	36.039	28.435	31.316	33.699	34.94	27.962	34.741	23.605	23.741	31.819	28.156	31.173	34.685	30.683	31.267
78.616	42.662	32.586	41.183	29.293	39.818	31.781	40.371	42.44	34.006	41.162	30.215	46.556	33.747	48.268	35.091	45.758	44.073
36.319	20.719	13.996	24.394	17.834	19.061	15.711	27.251	26.644	19.861	19.972	13.503	27.334	11.766	26.723	13.889	24.199	17.721
19.686	18.318	15.088	18.735	17.456	15.428	14.95	16.047	16.772	16.045	24.181	15.854	27.748	16.741	24.564	22.973	25.517	21.336
13.769	16.415	13.831	16.725	12.883	12.636	13.926	16.047	16.746	14.126	17.943	10.879	18.965	11.594	17.803	16.17	16.56	16.945
34.404	28.837	22.134	28.153	21.584	26.186	26.922	24.119	24.579	28.864	31.234	17.866	37.616	17.902	41.334	24.131	38.032	32.58
21.97	20.131	15.195	21.459	15.465	17.335	17.943	22.303	19.147	15.824	21.08	12.841	25.012	12.302	24.673	14.777	20.24	16.96
17.131	24.927	24.746	22.186	20.288	16.125	26.368	19.825	24.277	18.812	25.817	19.244	30.013	20.318	28.781	26.987	29.731	27.676
33.82	23.939	24.83	21.573	22.593	22.119	22.682	19.931	19.792	16.992	25.98	20.163	21.124	24.152	22.757	26.987	24.271	25.986
25.813	22.21	19.951	19.428	16.657	22.119	18.403	18.794	19.792	15.36	24.609	16.117	23.187	17.443	24.913	22.014	24.271	22.442
26.509	24.786	17.675	23.789	19.403	17.611	22.088	26.112	21.506	27.849	25.768	14.333	32.42	16.378	32.702	24.412	30.838	25.813
24.953	29.232	24.349	29.172	21.522	37.519	25.432	29.17	26.489	34.742	32.425	20.98	37.284	21.502	37.764	25.494	36.879	28.317
29.067	29.929	31.216	29.293	25.179	25.388	30.538	27.226	29.596	25.074	32.425	23.058	37.355	24.546	37.232	29.532	36.141	29.339
29.969	27.461	25.945	29.293	19.731	26.891	23.257	26.472	30.6	19.383	33.912	23.058	31.542	24.546	32.476	29.532	32.641	29.339
25.201	14.2	17.399	15.475	14.56	21.474	18.312	16.862	15.709	16.619	13.274	10.941	16.746	11.326	16.805	15.955	15.496	12.809
27.181	20.253	19.183	20.993	17.04	23.419	20.771	22.955	24.673	16.925	18.728	17.303	22.729	15.595	21.864	22.78	24.593	17.752
19.33	20.253	19.308	19.774	16.532	14.8	19.699	19.557	20.872	15.439	20.492	17.073	20.679	18.255	21.925	21.013	18.315	20.828
31.098	23.006	20.837	23.218	19.335	15.822	19.699	21.403	29.908	17.201	22.282	18.836	23.573	18.929	24.138	23.102	23.928	22.202
17.96	15.174	12.699	13.801	14.517	21.402	15.89	15.686	16.326	17.201	15.572	11.576	20.489	13.863	20.145	14.911	20.164	16.773
29.385	29.753	23.01	26.286	23.407	24.508	31.753	28.945	25.298	22.953	27.919	21.144	36.16	26.258	35.389	25.032	33.765	27.898
10.536	18.622	17.407	22.309	13.847	17.435	15.642	24.686	21.509	22.037	24.125	13.744	30.453	15.484	34.77	21.004	33.183	25.996
12.863	34.55	32.51	32.156	24.665	29.386	34.263	37.579	29.968	28.401	34.539	23.681	54.66	23.683	46.783	34.395	56.688	43.116
31.572	52.637	54.209	47.381	49.215	44.128	61.277	49.775	46.526	39.559	49.752	30.878	56.796	33	52.587	47.232	57.213	56.656
24.644	23.921	27.936	23.534	23.677	17.616	28.953	22.886	27.222	20.045	21.105	14.693	22.535	17.406	19.958	18.513	25.718	20.608
33.063	24.056	27.459	22.16	24.124	19.81	28.953	22.886	23.841	20.045	23.261	14.6	27.204	17.406	26.634	22.146	28.249	22.914
28.483	23.519	27.459	20.427	26.145	28.322	33.568	25.444	23.003	23.733	24.756	17.879	27.143	19.403	31.655	25.331	34.747	30.444
28.703	19.638	14.792	17.623	12.867	22.599	13.96	20.624	16.176	19.204	23.024	10.52	28.396	12.347	35.616	19.211	36.054	23.995
24.349	27.164	21.355	24.143	21.155	22.915	19.866	29.974	21.21	24.006	34.859	15.175	39.663	19.851	43.047	23.262	51.092	31.399
16.572	28.449	29.335	29.209	26.071	55.709	37.104	27.856	25.089	18.697	23.862	20.578	29.248	18.268	26.503	22.849	30.812	26.809
29.732	70.663	66.12	56.694	59.541	74.537	71.577	55.367	58.635	43.852	62.314	51.784	79.448	52.568	63.265	60.146	61.013	70.035
33.613	51.944	42.525	51.817	40.429	38.082	42.518	50.046	50.171	40.563	54.364	31.848	60.327	34.447	57.969	48.461	54.681	49.251
21.045	35.198	31.058	38.836	31.078	29.569	37.541	40.435	36.095	37.101	32.832	32.864	41.468	44.157	37.158	39.684	38.715	37.378
26.451	56.316	52.245	45.93	34.34	39.661	44.444	48.352	47.934	46.306	66.267	56.223	56.854	67.77	50.515	72.288	48.219	71.654
47.603	82.841	72.674	81.5	60.935	63.831	69.786	81.894	81.305	87.322	94.882	90.324	91.599	100.45	88.897	93.758	89.082	95.389
51.131	79.719	62.973	73.318	67.248	75.136	62.533	81.894	73.797	88.62	77.772	63.722	86.512	63.633	84.203	73.346	89.082	77.173
51.026	55.991	46.862	61.156	59.174	52.279	51.71	58.033	58.011	51.188	49.31	35.073	65.233	36.575	68.203	43.246	54.81	51.776
48.845	50.929	46.862	57.074	48.377	57.336	50.202	58.033	52.276	52.626	45.979	38.27	53.502	34.786	55.395	42.833	50.747	52
112.19	125.16	139.5	110.39	126.04	90.437	114.75	107.36	116.14	94.237	126.22	108.14	130.56	116.6	129.05	112.9	128.48	124.81
77.068	81.475	68.17	106.46	73.026	84.157	84.738	115	97.321	118.97	66.476	45.446	78.545	46.548	82.466	53.82	98.737	63.939
51.229	72.203	54.382	78.239	59.929	63.801	56.169	87.329	65.941	85.837	76.505	60.958	78.545	63.345	82.466	59.605	80.606	70.203
47.253	45.454	54.382	46.296	45.298	46.536	37.565	47.978	45.296	55.5	50.025	68.299	49.465	65.863	54.745	60.905	76.072	54.815
206.05	167.03	171.12	153.36	153.48	90.639	168.44	94.518	161.34	85.331	164.76	168.34	148.96	149.81	131.75	161.24	121.12	172.99
206.05	115.55	142.33	137.73	126.05	121.48	131.88	121.7	138.98	112.91	125.88	118.18	101.64	104.1	97.919	118.36	94.854	129.49
160.17	141.78	155.58	140.99	126.95	116.37	141.73	133.82	146.55	116.72	148.09	158.65	136.41	165	146.74	146.07	157.43	152.1
84.056	51.949	42.521	50.294	37.686	103.93	43.772	51.103	49.562	44.687	57.575	38.776	60.3	44.292	58.238	44.995	58.145	58.146
79.23	52.397	60.944	52.224	44.461	43.41	66.642	52.93	53.616	42.078	54.039	60.287	64.284	38.226	62.864	45.275	47.898	59.883
84.973	101.92	95.622	105.81	82.858	87.064	130.81	124.78	100.05	128.9	121.62	119.87	113.95	123.39	109.78	123.35	115.47	126.05
97.954	70.375	51.104	80.874	58.542	75.912	64.824	89.297	69.928	115.48	91.845	94.811	90.391	106.69	86.222	97.742	97.978	93.266
98.087	63.383	51.104	69.702	51.044	72.236	50.654	89.619	63.486	106.14	74.543	49.944	78.919	56.924	86.222	51.555	109.97	67.44
101.96	87.952	94.034	69.142	88.061	95.409	82.143	84.911	80.497	90.87	95.436	90.66	98.711	86.394	105.48	78.879	118.74	92.789
101.26	110.11	111.08	107.49	125.13	103.79	108.56	116.49	105.79	130.74	107.07	108.98	97.966	117.77	105.48	107.47	106.88	103.84
84.745	79.903	64.507	85.366	78.752	79.399	80.073	98.574	92.089	132.53	75.839	58.64	93.626	64.867	91.352	68.059	92.965	75.8
114.5	112.98	99.442	138.79	128.57	129.63	122.76	130.57	129.75	138.08	78.744	74.858	100.82	77.934	103.35	88.745	101.45	74.716
85.372	105.88	79.281	115.72	103.53	201.26	92.214	150.05	106.64	163.93	88.493	77.871	99.861	85.767	103.35	93.715	120.38	86.665
103.77	111.44	90.097	96.688	101.93	154.99	97.49	112.67	99.44	139.11	98.037	137.56	107.42	127.59	114.75	103.51	109.41	99.096
103.77	92.19	115.67	94.488	98.61	149.81	97.49	85.02	88.955	103.21	87.718	101.57	92.914	92.75	82.405	96.341	72.838	96.189
98.497	92.19	115.67	66.905	83.627	90.541	83.544	63.369	77.904	62.552	116.52	138.51	96.275	131.65	110.38	122.84	112.25	130.12
121.28	122.83	129.6	111.69	154.19	160.97	132.79	101.68	130.71	92.126	120.91	149.3	100.55	148.33	107.5	135.2	115.74	137.29
219.37	122.83	129.6	130.31	138.45	104.33	132.79	136.83	130.71	136.24	120.91	149.3	109.2	148.33	123.26	135.2	159.1	137.29
104.96	132.34	113.71	130.31	124.18	130.1	130.63	139.75	133.45	175.27	124.95	133.1	121.39	132.21	119.85	131.51	130.66	124.97
128.15	132.34	159.89	127.39	192.37	120.66	161.5	127.46	136.47	148.43	113.87	133.1	121.39	132.21	117.8	129.52	117.97	114.73
112.77	171.44	173.36	156.9	193.62	140.12	178.04	153.18	174.6	157.14	161.88	165.99	141.81	159.15	135.58	180.88	136.86	184.14
96.755	62.482	90.477	72.281	92.615	132.26	81.219	76.294	74.612	83.559	74.154	115.29	59.267	119.95	65.729	99.829	88.986	83.649
143.19	146.77	178.8	117.21	168.05	139.18	154.12	93.633	129.44	138.35	153.34	170.87	140.52	155.91	135.75	160.19	124.64	151.63
123.31	101.88	135	109.81	168.05	139.18	154.12	120.32	107.83	168.25	76.889	96.262	89.834	83.005	95.468	83.246	126.74	68.491
202.7	112.01	111.01	110.4	121.27	132.81	119.84	133.4	121.75	179.25	103.95	108.03	103.26	106.62	128.24	87.212	157.55	98.568
128.34	112.01	111.01	131.55	136.35	123.23	133.62	143.61	124.92	170.56	103.95	76.619	127.35	77.263	138.98	84.594	137.78	97.625
108.23	145.83	145.02	130.51	136.35	108.29	147.34	129.77	143.82	151.67	134.06	133.13	148.65	125.91	148.57	122.04	154.66	130.16
144.98	106.43	116.12	93.168	122.13	94.53	109.48	85.795	98.575	94.718	113.93	123.77	116.31	121.51	111	115.48	99.899	114.57
96.78	90.068	97.185	96.035	120.18	105.89	98.64	92.674	94.675	101.33	98.998	113.3	80.427	110.44	80.014	107.82	75.739	101.35
153.57	105.77	135.67	108.42	134.51	85.196	130.48	95.243	118.02	90.453	106.31	128.19	94.212	123.58	106.94	114.66	111.69	111.3
118.04	98.744	96.262	95.135	111.09	109.4	87.513	88.415	87.471	81.254	103.22	111.11	103.79	109.86	105.71	104.04	119.13	105.08
97.021	94.537	79.952	84.461	94.896	82.606	87.184	92.439	88.442	101.9	108.72	151.12	78.688	154.18	75.353	126.77	84.326	129.63
135.38	78.672	79.952	45.861	61.713	67.313	60.77	41.314	62.718	78.728	108.72	162.95	71.844	154.18	62.939	138.01	56.189	126.65
132.65	84.619	90.239	113.33	91.03	96.975	92.063	110.42	95.213	152.96	73.228	63.876	77.204	64.336	84.806	73.706	92.674	75.643
131.81	72.727	72.163	83.282	88.125	120.54	91.87	96.81	85.974	122.92	76.715	61.239	73.309	65.785	74.137	73.751	72.859	65.664
151.75	72.727	91.552	63.561	86.613	128.49	69.403	69.275	63.898	98.763	97.678	117.31	73.309	133.59	71.82	108.02	72.434	110.74
199.71	132.74	140.68	161.59	151.82	140.51	147.78	173.28	144.09	197.29	125.86	149.19	137.91	148.08	148.11	138.77	150.6	132.38
187.84	166.56	153.1	158.9	143.26	122.05	144.94	151.77	134.7	148.2	177.02	200.35	166.56	198.37	181.2	179.45	191.15	184.4
108.97	130.62	125.25	116.38	116.37	84.83	115.4	107.89	122.05	141.46	143.98	134.17	143.71	142.41	153.57	141.4	164.94	140.61
81.864	136.92	94.233	125.98	136.9	114.57	103.94	166.11	103.99	191.13	146.83	123.93	165.19	136.28	162.34	128.33	153.01	148.65
103.74	86.264	89.133	86.811	97.854	83.621	101.65	71.665	91.324	87.163	86.549	81.964	86.338	92.31	79.255	92.351	83.736	91.267
52.587	95.613	77.452	136.21	94.332	121.65	113.73	143.39	118.68	119.02	77.487	50.592	89.308	49.466	83.866	61.936	82.121	67.653
115.58	135.12	140.75	166.2	166.2	138.76	171.6	147.9	166.4	149.06	138	122.76	133.59	140.44	117.35	128.44	102.23	133.41
137.82	137.06	171.32	120.26	143.05	124.82	144.31	127.56	129.36	125.36	145.41	170.27	137.51	168.09	152.15	152.88	160.66	158.99
145.07	139.57	140.44	120.26	128.23	190.68	121.84	141.36	115.21	123.59	145.41	170.27	139.26	166.9	152.15	141.71	160.66	154.8
122.34	143.84	151.17	136.07	150.51	191.46	150.1	135.9	137.21	123.48	130.4	143.57	134.68	136.21	132.84	133.33	131.48	128.65
112.56	125.07	120.28	115.92	104.69	127.07	127.53	121.44	121.68	128.41	109.01	96.442	126.24	102.79	123.93	116.99	124.36	117.1
181.53	134.64	132.83	115.92	133.58	127.07	131.96	122.13	122.18	142.22	158.38	132.48	137.76	128	148.93	140.94	156.63	142.05
127.25	104.99	91.019	105.77	110.27	91.125	98.048	100.61	91.628	120.2	96.717	122.71	95.368	119.6	89.287	109.33	101.02	102.75
121.48	127.74	140.59	116.43	128.79	132.4	132.2	115.09	122.81	158.4	131.37	155.44	138.75	145.16	154.82	132.41	151.26	128.35
122.04	115.02	144.18	89.731	124.21	104.11	114.02	106.26	96.68	147.32	114.51	157.83	115.88	139.79	125.73	131.49	150.15	134.26
153.98	184.65	181.55	168.97	162.75	219.25	162.47	189.93	155.2	195.58	185.35	182.15	196.31	162.49	202.92	177.8	211.64	174.25
142.96	77.208	69.478	66.395	80.347	53.43	62.361	70.868	62.442	67.55	91.986	132	77.038	126.22	58.104	116.48	68.668	114.54
136.31	243.3	191.92	193.3	203.12	313.15	195.2	227.99	201.51	185.56	251.38	247.57	248.53	228.73	244.62	240.21	193.72	235.35
98.567	139.7	97.585	157.53	121.48	228.59	118.13	190.89	142.72	214.39	159.15	159.64	149.05	146.26	151.75	154.95	169.07	154.1
155.58	148.27	129.82	154.99	124.58	140.65	134.2	147.3	144.88	136.01	158.54	132.22	152.32	140.1	151.75	146.51	152.66	157.07
172.06	55.894	85.994	72.559	85.973	85.125	84.819	62.207	76.481	78.825	55.462	71.76	42.941	69.808	40.19	65.296	47.677	64.609
137.72	99.338	94.95	136.11	143.29	129.57	105.2	145.06	126.35	165.85	82.863	75.805	104.22	79.355	110.67	75.81	137.1	83.558
174.01	179.39	172.08	142.33	204.53	107.82	190.75	152.23	153.52	162.69	146.46	156.33	159.94	132.76	152.69	143.67	181.51	141.33
199.16	139.26	151.31	142.33	125.06	108.86	129.42	152.23	146.69	162.69	156.49	160.23	173.2	166.01	191.68	149.39	201.95	153.89
190.95	139.09	129.36	113.31	108.58	99.308	126.39	123	116.63	127.67	154	142.32	162.39	149.24	161.27	142.15	162.08	152.45
136.65	108.22	94.088	124.66	79.772	111.1	103.25	116.62	111.31	122.19	114.67	95.918	107.57	100.74	101.47	105.98	116.27	128.12
103.32	103.82	127.76	108.35	132.53	82.975	134.18	94.737	119.9	93.229	97.034	118.3	87.499	122.94	80.754	125.49	78.176	112.36
122.62	105.71	127.41	119.01	152.96	134.06	138.55	100.49	137.22	121.37	82.457	98.035	99.661	100.03	108.83	96.785	78.176	93.07
108.94	91.16	99.528	93.806	114.21	109.93	94.945	83.358	93.767	74.723	84.166	92.133	67.758	92.416	66.288	93.637	66.807	91.135
183.09	142.03	135.45	144.27	130.47	111.82	138.56	139.47	144.85	142.75	144.65	125.15	151.58	129.61	154.88	131.08	183.63	134.41
183.09	93.433	108.7	96.239	128.78	116.97	127.78	98.557	107.2	142.75	95.012	97.582	118.85	87.319	129.18	79.89	151.18	83.673
135.88	109.8	124	83.974	109.71	81.592	89.796	98.557	88.318	99.003	122.45	103.36	118.85	101.9	124.9	106.08	148.04	116.58
175.61	124.2	162.11	105.43	123.65	98.77	125.29	105.09	122.77	104.83	141.21	157.64	123.81	162.13	124.34	147.37	115.9	152.51
40.779	52.963	53.242	49.278	53.372	86.447	45.83	51.715	44.93	104.83	48.706	52.749	44.704	51.063	44.353	51.06	41.219	67.782
70.587	77.688	67.448	67.228	63.654	44.805	59.019	57.119	66.538	45.806	84.601	69.04	74.016	85.303	71.63	81.175	78.179	87.66
70.699	77.688	67.448	103.53	68.661	96.261	73.733	109.04	92.187	106.96	84.601	74.051	85.23	90.029	77.894	79.287	80.116	87.66
162.29	125.9	145.51	111.77	111.72	75.989	119.65	109.16	112.92	95.061	150.35	141.41	121.78	148.76	107.07	148.85	96.801	146.37
201.01	136.37	130.65	128.82	148.69	115.49	114.38	110.58	123.03	123.2	136.39	133.14	134.86	134.36	142.19	132.4	137.24	137.24
80.668	54.629	65.558	60.223	60.1	53.988	62.42	56.608	56.571	63.616	60.911	67.86	65.653	65.724	70.838	61.314	77.555	68.489
122.58	98.121	93.114	87.936	94.297	99.044	102.4	68.955	91.979	84.119	85.9	72.373	103.37	74.358	89.616	87.45	104.25	87.152
151.59	80.287	106.11	76.848	119.45	58.613	92.444	70.072	85.566	66.709	102.33	123.85	71.623	157.52	67.721	103.55	62.303	104.5
88.47	103.27	104.79	74.703	119.26	160.37	102.62	72.201	84.981	70.515	102.33	123.85	75.61	126.76	69.059	105.54	80.55	98.823
102.42	91.231	102.19	104.68	106.69	96.991	105.47	92.043	92.416	105.14	77.644	89.928	75.932	94.118	73.4	89.412	79.402	71.361
121	132.42	127.9	130.9	116.66	107.37	136.74	128.45	134.32	113.42	130.25	155.52	131.77	155.5	117.52	142.13	97.1	128.07
86.689	132.42	123.78	146.63	117.48	270.54	136.74	134.66	141.15	120.79	130.25	135.64	129.98	161.35	119.7	152.75	128.13	130.57
61.166	91	74.158	92.542	87.064	184.82	80.904	100.81	80.509	114.3	99.059	84.701	114.67	90.136	114.73	84.263	108.95	104.57
132.22	116.56	105.37	115.04	139.47	125.19	122.72	119.2	117.38	112.55	99.059	89.208	122.71	90.136	121.53	84.263	121.06	105.19
140.48	115.38	158.85	92.794	131.88	85.598	139.17	80.525	113.21	83.42	120.8	144.97	111.57	141.34	104.85	140.44	92.325	135.91
176.32	125.45	104.93	125.22	120.58	120.69	109.54	145.21	112.85	176.9	113.62	101.3	131.06	98.9	137.61	100.31	141.77	122.37
83.344	70.706	96.32	68.613	88.994	143.84	101.13	64.744	78.956	61.344	68.313	72.628	47.916	80.971	47.074	89.837	54.624	75.293
139.52	84.966	95.208	68.613	89.422	55.045	75.952	67.865	76.071	90.536	98.812	85.596	91.775	87.188	99.208	89.837	95.974	104.81
193.19	247.61	268.73	207.96	257.8	163.94	258.31	178.48	223.05	157.8	255.56	277.47	227.79	289.31	216.53	253.3	187.47	265.96
181.64	96.475	113.45	98.385	123.73	93.159	116.8	99.255	103.47	112.27	91.229	131.2	93.336	141.19	94.573	102.23	120.32	98.96
156.41	137.6	123.46	127.36	122.51	95.595	126.04	112.62	119.9	115.37	132.87	131.2	141.68	137.75	145.53	110.3	158.72	121.95
156.41	119	133.45	135.59	123.43	109.25	134.83	149.7	130.85	176.56	108.06	124.84	110.7	125.47	109.44	114.29	118	107.62
77.691	88.833	89.348	80.952	84.443	58.613	92.321	68.241	80.638	84.278	98.166	77.857	90.054	96.384	87.207	81.051	72.035	87.233
178.17	109.11	145.36	87.776	118.09	52.806	110.56	79.294	93.476	87.04	125.57	153.15	107.15	144.84	100.65	142.59	99.311	137.46
86.929	132.74	136.44	97.696	144.81	71.025	132.28	92.618	104.9	110.32	123.96	96.596	123.16	99.656	123.38	132	131.63	124.78
90.918	73.05	96.375	69.57	94.487	143.29	72.645	54.781	66.146	64.183	75.925	97.272	49.214	99.656	50.593	97.805	54.887	90.463
84.52	73.05	88.089	77.427	90.747	140.07	72.645	70.817	70.302	77.242	71.74	80.715	57.68	92.019	53.014	81.761	55.59	82.247
[truncated: 41,201 more rows]
